# Supplementary material for: Transcriptional analysis through RNA sequencing of giant cells induced by Meloidogyne graminicola in rice roots
Source: PubMed Central journal article supplement — J Exp Bot. 2013 Jul 23;64(12):3885–98. doi: 10.1093/jxb/ert219 (PMC3745741; doi:10.1093/jxb/ert219), 2013-07-23
Supplement: supp_ert219_jexbot103549_file001.pdf [file supp_ert219_jexbot103549_file001.pdf]

**Table S1.** Locus number, annotation, primer pairs and amplification efficiency of qRT-PCR analyses.

| <b>Locusnumber</b>     | <b>Annotation</b>                                                       | <b>forward</b>          | <b>reverse</b>          | <b>reaction efficiency</b> |
|------------------------|-------------------------------------------------------------------------|-------------------------|-------------------------|----------------------------|
| <b>Target genes</b>    |                                                                         |                         |                         |                            |
| LOC_Os06g29950         | MATE domain containing protein                                          | ATTGTGGGCATACCTTCAGC    | ATCCCAATTTGTGCATAGGG    | 0.85                       |
| LOC_Os12g08760         | carboxyvinyl-carboxyphosphonate phosphorylmutase                        | AGGAGGACCAAGGGTTATCG    | GGACTTGATGAGGTGGAACC    | 0.7                        |
| LOC_Os11g32650         | chalcone synthase                                                       | CAAGAGGATGTGTGACAAGTCG  | GCACATGTTGGGGTTCTCC     | 0.7                        |
| LOC_Os08g09080         | Cupin domain containing protein                                         | TGTGTTTCGATTCCCTGTGG    | AGGGTTCTGGCTGCTAAGTG    | 0.75                       |
| LOC_Os01g55240         | gibberellin 2-beta-dioxygenase                                          | ACTCGTTGCAGGTTCTGACC    | TGCAATCCTCTGTGCTAACG    | 0.9                        |
| LOC_Os11g44960         | NBS-LRR disease resistance protein                                      | GAGAGGGTCTCCAACCTTCC    | CTCCAAACCACCCAACCTCC    | 0.75                       |
| LOC_Os03g14990         | chorismate synthase 2, chloroplast precursor                            | TGTTTCAAGGGAGCATGAGG    | CATCAGCTGGTCCATGAGG     | 0.75                       |
| LOC_Os09g28690         | gibberellin receptor GID1L2                                             | GAGGGCCACGTCTACTTCC     | CTAGTTGCGGTTGATGAAGG    | 0.85                       |
| LOC_Os02g35180         | OsRR2 type-A response regulator                                         | TGGCAGGACTAGCCATGGTGATG | TGCTGCCATTGGACCATCTGTGC | 0.7                        |
| LOC_Os01g51700         | ras-related protein, putative, expressed Ras GTPase                     | GGAGGGAAAAGCAGAGTGG     | CAGACAAGAACGCACTGTCCG   | 0.8                        |
| LOC_Os02g19440         | sirohochlorin ferrochelataze, Cobalamin (vitamin B12) biosynthesis CbiX | ATCTCAATCCCCTTCCAACC    | CTCGGCAACTTGACAAAGC     | 0.7                        |
| LOC_Os03g16010         | BRASSINOSTEROID INSENSITIVE 1-associated receptor kinase 1 precursor    | TTCAGGGTGGAGCTATGTGG    | TTTATAAACCGTCCCGAAGC    | 0.7                        |
| LOC_Os02g56880         | transcriptional corepressor LEUNIG                                      | GTGTTCCACCCAAGCTATGC    | ACCTTCATGGGCTTGTATCG    | 0.7                        |
| <b>Reference genes</b> |                                                                         |                         |                         |                            |
| LOC_Os03g27010         | Expressed protein                                                       | TGTGAGCAGCTTCTCGTTTG    | TGTTGTTGCCTGTGAGATCG    | 0.7                        |
| LOC_Os07g02340         | Expressed protein                                                       | AGGAACATGGAGAAGAACAAGG  | CAGAGGTGGTGCAGATGAAA    | 0.7                        |

**Table S2.** List of transcripts that are significantly differentially expressed in 7 dai giant cells induced by *M. graminicola*. The list shows the chromosomal location and the log<sub>2</sub>FC between giant cells and control vascular cells of each transcript.

| Transcript_ID    | Description                                                                        | Chr   | Left     | Right    | Sense | ExonCount | TotalExon Length | log2FC (7daiGC_vs_control) |
|------------------|------------------------------------------------------------------------------------|-------|----------|----------|-------|-----------|------------------|----------------------------|
| LOC_Os06g29950.1 | MATE domain containing protein, expressed                                          | Chr6  | 17242871 | 17248084 | +     | 10        | 2117             | -9.94                      |
| LOC_Os06g46149.1 | serine/arginine repetitive matrix protein 1, putative, expressed                   | Chr6  | 27960874 | 27971323 | +     | 5         | 1510             | -9.71                      |
| LOC_Os06g46149.2 | serine/arginine repetitive matrix protein 1, putative, expressed                   | Chr6  | 27960869 | 27971323 | +     | 5         | 1519             | -9.71                      |
| LOC_Os12g13890.1 | retrotransposon protein, putative, unclassified, expressed                         | Chr12 | 7874180  | 7875247  | -     | 1         | 1100             | -9.65                      |
| LOC_Os12g13890.2 | retrotransposon protein, putative, unclassified, expressed                         | Chr12 | 7874180  | 7875247  | -     | 2         | 745              | -9.57                      |
| LOC_Os03g55010.1 | UDP-glucuronosyl and UDP-glucosyl transferase domain containing protein, expressed | Chr3  | 31281994 | 31284676 | +     | 2         | 1658             | -9.49                      |
| LOC_Os09g39190.1 | OsFBO22 - F-box and other domain containing protein, expressed                     | Chr9  | 22507884 | 22513289 | -     | 12        | 3171             | -9.36                      |
| LOC_Os09g39190.2 | OsFBO22 - F-box and other domain containing protein, expressed                     | Chr9  | 22507884 | 22513289 | -     | 11        | 3231             | -9.36                      |
| LOC_Os03g55030.1 | UDP-glucuronosyl and UDP-glucosyl transferase domain containing protein, expressed | Chr3  | 31294497 | 31297075 | -     | 2         | 1723             | -9.34                      |
| LOC_Os03g55030.2 | UDP-glucuronosyl and UDP-glucosyl transferase domain containing protein, expressed | Chr3  | 31294499 | 31297158 | -     | 3         | 1732             | -9.34                      |
| LOC_Os12g05880.1 | Cupin domain containing protein, expressed                                         | Chr12 | 2699175  | 2700272  | -     | 1         | 1130             | -9.25                      |
| LOC_Os04g51920.1 | protein disulfide isomerase, putative, expressed                                   | Chr4  | 30805662 | 30808467 | -     | 5         | 1592             | -9.25                      |
| LOC_Os08g30020.6 | membrane protein, putative, expressed                                              | Chr8  | 18452698 | 18456676 | +     | 8         | 1631             | -9.22                      |
| LOC_Os10g41999.1 | RALFL27 - Rapid Alkalinization Factor RALF family protein precursor, expressed     | Chr10 | 22578902 | 22583351 | +     | 3         | 1014             | -9.20                      |
| LOC_Os08g30020.8 | membrane protein, putative, expressed                                              | Chr8  | 18452698 | 18454473 | +     | 4         | 695              | -9.18                      |
| LOC_Os12g08760.1 | carboxyvinyl-carboxyphosphonate phosphorylmutase, putative, expressed              | Chr12 | 4499736  | 4503990  | +     | 7         | 1973             | -9.11                      |
| LOC_Os09g29660.1 | white-brown complex homolog protein 11, putative, expressed                        | Chr9  | 18034121 | 18039233 | +     | 8         | 2722             | -9.09                      |
| LOC_Os06g17970.1 | NBS-LRR disease resistance protein, putative, expressed                            | Chr6  | 10445052 | 10451152 | +     | 4         | 4373             | -9.00                      |
| LOC_Os01g25630.1 | NB-ARC domain containing protein, expressed                                        | Chr1  | 14526602 | 14531604 | -     | 4         | 3292             | -8.99                      |
| LOC_Os10g41980.1 | RALFL26 - Rapid Alkalinization Factor RALF family protein precursor, expressed     | Chr10 | 22575212 | 22576531 | +     | 2         | 695              | -8.80                      |
| LOC_Os03g01700.1 | expressed protein                                                                  | Chr3  | 430478   | 432878   | -     | 2         | 2370             | -8.76                      |
| LOC_Os03g16960.1 | cysteine-rich repeat secretory protein 55 precursor, putative, expressed           | Chr3  | 9425490  | 9426843  | -     | 2         | 1330             | -8.65                      |
| LOC_Os04g51920.2 | protein disulfide isomerase, putative, expressed                                   | Chr4  | 30806238 | 30808464 | -     | 2         | 928              | -8.60                      |
| LOC_Os01g08090.1 | flavonol-3-O-glycoside-7-O-glucosyltransferase 1, putative, expressed              | Chr1  | 3917918  | 3920458  | +     | 2         | 1897             | -8.58                      |
| LOC_Os01g36560.1 | auxin-induced protein 5NG4, putative, expressed                                    | Chr1  | 20287702 | 20290661 | -     | 7         | 1443             | -8.55                      |
| LOC_Os09g37330.1 | OsSAUR39 - Auxin-responsive SAUR gene family member, expressed                     | Chr9  | 21565736 | 21566560 | -     | 1         | 857              | -8.47                      |
| LOC_Os11g36200.2 | receptor-like protein kinase 2 precursor, putative, expressed                      | Chr11 | 21297839 | 21301732 | +     | 2         | 3808             | -8.43                      |
| LOC_Os11g36200.1 | receptor-like protein kinase 2 precursor, putative, expressed                      | Chr11 | 21297806 | 21301732 | +     | 1         | 3959             | -8.43                      |
| LOC_Os08g38170.3 | methyladenine glycosylase, putative, expressed                                     | Chr8  | 24186670 | 24189469 | +     | 4         | 2099             | -8.32                      |
| LOC_Os08g38170.1 | methyladenine glycosylase, putative, expressed                                     | Chr8  | 24186670 | 24189469 | +     | 5         | 1822             | -8.32                      |
| LOC_Os03g51479.3 | maf, putative, expressed                                                           | Chr3  | 29454977 | 29456651 | +     | 7         | 1260             | -8.31                      |
| LOC_Os01g15340.1 | flowering promoting factor-like 1, putative, expressed                             | Chr1  | 8586049  | 8586941  | -     | 1         | 925              | -8.31                      |
| LOC_Os01g68720.1 | keratin, type I cytoskeletal 9, putative, expressed                                | Chr1  | 39918935 | 39920664 | -     | 2         | 1560             | -8.29                      |
| LOC_Os08g38170.4 | methyladenine glycosylase, putative, expressed                                     | Chr8  | 24186670 | 24189469 | +     | 3         | 2707             | -8.27                      |
| LOC_Os08g38170.5 | methyladenine glycosylase, putative, expressed                                     | Chr8  | 24186670 | 24189469 | +     | 2         | 2761             | -8.27                      |
| LOC_Os05g47750.1 | Ser/Thr protein kinase, putative, expressed                                        | Chr5  | 27353477 | 27357619 | -     | 3         | 1472             | -8.25                      |
| LOC_Os08g44860.4 | aminopeptidase, putative, expressed                                                | Chr8  | 28173231 | 28181743 | -     | 31        | 4337             | -8.23                      |
| LOC_Os08g44860.5 | aminopeptidase, putative, expressed                                                | Chr8  | 28173231 | 28181743 | -     | 30        | 4227             | -8.22                      |
| LOC_Os08g44860.6 | aminopeptidase, putative, expressed                                                | Chr8  | 28173231 | 28181743 | -     | 29        | 4150             | -8.22                      |
| LOC_Os08g44860.8 | aminopeptidase, putative, expressed                                                | Chr8  | 28173231 | 28181743 | -     | 29        | 4184             | -8.22                      |

|                  |                                                                             |       |          |            |    |      |       |
|------------------|-----------------------------------------------------------------------------|-------|----------|------------|----|------|-------|
| LOC_Os08g44860.7 | aminopeptidase, putative, expressed                                         | Chr8  | 28173231 | 28181743 - | 29 | 4186 | -8.22 |
| LOC_Os05g50730.1 | expressed protein                                                           | Chr5  | 29077045 | 29078538 - | 2  | 1449 | -8.22 |
| LOC_Os08g44860.3 | aminopeptidase, putative, expressed                                         | Chr8  | 28173231 | 28181743 - | 32 | 4502 | -8.18 |
| LOC_Os08g44860.1 | aminopeptidase, putative, expressed                                         | Chr8  | 28173231 | 28181743 - | 32 | 4568 | -8.18 |
| LOC_Os08g44860.2 | aminopeptidase, putative, expressed                                         | Chr8  | 28173231 | 28181743 - | 32 | 4477 | -8.18 |
| LOC_Os01g74490.1 | heavy metal-associated domain containing protein, expressed                 | Chr1  | 43141841 | 43142670 + | 1  | 862  | -8.16 |
| LOC_Os11g40840.1 | receptor-like protein kinase 2 precursor, putative, expressed               | Chr11 | 24437028 | 24438326 - | 1  | 1331 | -8.16 |
| LOC_Os09g32100.1 | expressed protein                                                           | Chr9  | 19166350 | 19167844 + | 2  | 1450 | -8.12 |
| LOC_Os12g33150.1 | expressed protein                                                           | Chr12 | 20058249 | 20059540 - | 3  | 396  | -8.08 |
| LOC_Os01g71106.2 | NBS-LRR disease resistance protein, putative, expressed                     | Chr1  | 41155813 | 41160726 - | 3  | 4536 | -8.07 |
| LOC_Os06g51070.1 | no apical meristem protein, putative, expressed                             | Chr6  | 30893477 | 30894523 - | 1  | 1079 | -8.06 |
| LOC_Os11g42510.1 | tyrosine aminotransferase, putative, expressed                              | Chr11 | 25596437 | 25602418 - | 8  | 1940 | -8.03 |
| LOC_Os08g24310.1 | receptor-like protein kinase precursor, putative, expressed                 | Chr8  | 14673019 | 14679422 + | 2  | 3341 | -8.03 |
| LOC_Os12g26290.2 | alpha-DOX2, putative, expressed                                             | Chr12 | 15330146 | 15340505 - | 12 | 2796 | -8.01 |
| LOC_Os02g02780.1 | protein kinase family protein, putative, expressed                          | Chr2  | 1050786  | 1056830 -  | 16 | 2762 | -8.01 |
| LOC_Os12g26290.5 | alpha-DOX2, putative, expressed                                             | Chr12 | 15330146 | 15340505 - | 10 | 3153 | -8.01 |
| LOC_Os12g26290.3 | alpha-DOX2, putative, expressed                                             | Chr12 | 15330146 | 15340505 - | 11 | 2686 | -8.01 |
| LOC_Os12g26290.1 | alpha-DOX2, putative, expressed                                             | Chr12 | 15330146 | 15340505 - | 11 | 2698 | -8.01 |
| LOC_Os12g26290.4 | alpha-DOX2, putative, expressed                                             | Chr12 | 15330146 | 15340505 - | 10 | 2574 | -8.01 |
| LOC_Os05g47770.1 | serine/threonine-protein kinase At1g18390 precursor, putative, expressed    | Chr5  | 27360906 | 27367545 + | 5  | 2516 | -7.99 |
| LOC_Os03g51479.1 | maf, putative, expressed                                                    | Chr3  | 29455123 | 29457859 + | 7  | 2251 | -7.98 |
| LOC_Os12g12010.1 | verticillium wilt disease resistance protein precursor, putative, expressed | Chr12 | 6583346  | 6586345 +  | 1  | 3032 | -7.94 |
| LOC_Os07g46350.1 | OsSCP40 - Putative Serine Carboxypeptidase homologue, expressed             | Chr7  | 27638815 | 27643797 - | 7  | 2210 | -7.93 |
| LOC_Os05g51590.1 | N-rich protein, putative, expressed                                         | Chr5  | 29584730 | 29586168 - | 1  | 1471 | -7.91 |
| LOC_Os03g51479.2 | maf, putative, expressed                                                    | Chr3  | 29455127 | 29457859 + | 9  | 2066 | -7.91 |
| LOC_Os12g26290.6 | alpha-DOX2, putative, expressed                                             | Chr12 | 15330146 | 15340505 - | 12 | 2603 | -7.90 |
| LOC_Os03g28300.2 | protein kinase domain containing protein, expressed                         | Chr3  | 16282782 | 16290482 + | 6  | 3998 | -7.81 |
| LOC_Os05g01370.1 | polygalacturonase inhibitor precursor, putative, expressed                  | Chr5  | 227008   | 228036 +   | 1  | 1061 | -7.80 |
| LOC_Os01g11660.1 | GDSL-like lipase/acylhydrolase, putative, expressed                         | Chr1  | 6288365  | 6292303 +  | 5  | 1456 | -7.80 |
| LOC_Os02g13870.1 | aquaporin protein, putative, expressed                                      | Chr2  | 7515989  | 7519336 -  | 4  | 1836 | -7.80 |
| LOC_Os03g28300.1 | protein kinase domain containing protein, expressed                         | Chr3  | 16282710 | 16290482 + | 8  | 3506 | -7.78 |
| LOC_Os12g10220.1 | expressed protein                                                           | Chr12 | 5399052  | 5401401 +  | 2  | 654  | -7.78 |
| LOC_Os01g55240.1 | gibberellin 2-beta-dioxygenase, putative, expressed                         | Chr1  | 31795105 | 31797643 + | 3  | 1847 | -7.76 |
| LOC_Os08g30020.5 | membrane protein, putative, expressed                                       | Chr8  | 18452698 | 18457151 + | 9  | 1986 | -7.75 |
| LOC_Os07g48450.1 | no apical meristem protein, putative, expressed                             | Chr7  | 28985797 | 28988032 + | 3  | 1750 | -7.73 |
| LOC_Os07g48450.2 | no apical meristem protein, putative, expressed                             | Chr7  | 28985797 | 28988032 + | 2  | 1798 | -7.73 |
| LOC_Os07g13870.1 | OsFBX229 - F-box domain containing protein, expressed                       | Chr7  | 7938934  | 7941316 -  | 3  | 1743 | -7.71 |
| LOC_Os03g41438.1 | serpin domain containing protein, putative, expressed                       | Chr3  | 23054583 | 23068315 + | 3  | 1680 | -7.67 |
| LOC_Os07g48450.3 | no apical meristem protein, putative, expressed                             | Chr7  | 28985797 | 28988032 + | 2  | 2220 | -7.65 |
| LOC_Os01g16370.1 | NBS-LRR type disease resistance protein, putative, expressed                | Chr1  | 9293171  | 9299788 +  | 6  | 3641 | -7.62 |
| LOC_Os01g16370.2 | NBS-LRR type disease resistance protein, putative, expressed                | Chr1  | 9293171  | 9299788 +  | 5  | 3441 | -7.62 |
| LOC_Os11g44630.1 | calmodulin binding protein, putative, expressed                             | Chr11 | 26983106 | 26985704 - | 5  | 1291 | -7.54 |
| LOC_Os12g38660.1 | expressed protein                                                           | Chr12 | 23750274 | 23750582 - | 1  | 341  | -7.52 |
| LOC_Os04g13220.1 | ABC transporter family protein, putative, expressed                         | Chr4  | 7317232  | 7325788 -  | 11 | 5326 | -7.45 |
| LOC_Os09g10054.1 | disease resistance protein RPS2, putative, expressed                        | Chr9  | 5471800  | 5491310 -  | 3  | 4052 | -7.43 |

|                  |                                                                                           |       |          |            |    |      |       |
|------------------|-------------------------------------------------------------------------------------------|-------|----------|------------|----|------|-------|
| LOC_Os12g36640.2 | universal stress protein domain containing protein, putative, expressed                   | Chr12 | 22429351 | 22431795 - | 4  | 1061 | -7.40 |
| LOC_Os12g36640.1 | universal stress protein domain containing protein, putative, expressed                   | Chr12 | 22429351 | 22431800 - | 4  | 1075 | -7.40 |
| LOC_Os08g07380.1 | retrotransposon protein, putative, unclassified, expressed                                | Chr8  | 4132495  | 4143561 -  | 12 | 5718 | -7.40 |
| LOC_Os01g25720.2 | disease resistance protein RGA4, putative, expressed                                      | Chr1  | 14576587 | 14581967 - | 2  | 5352 | -7.33 |
| LOC_Os01g25720.1 | disease resistance protein RGA4, putative, expressed                                      | Chr1  | 14576587 | 14581967 - | 1  | 5413 | -7.33 |
| LOC_Os06g41740.1 | transposon protein, putative, CACTA, En/Spm sub-class, expressed                          | Chr6  | 25020457 | 25021422 - | 1  | 998  | -7.28 |
| LOC_Os11g45850.1 | WRKY61, expressed                                                                         | Chr11 | 27740142 | 27741375 + | 3  | 1067 | -7.28 |
| LOC_Os06g39120.1 | expressed protein                                                                         | Chr6  | 23232523 | 23233878 + | 2  | 1289 | -7.26 |
| LOC_Os12g38720.1 | expressed protein                                                                         | Chr12 | 23782739 | 23783531 - | 1  | 825  | -7.25 |
| LOC_Os08g30020.2 | membrane protein, putative, expressed                                                     | Chr8  | 18452699 | 18458174 + | 13 | 2505 | -7.25 |
| LOC_Os08g30020.1 | membrane protein, putative, expressed                                                     | Chr8  | 18452605 | 18458174 + | 13 | 2551 | -7.25 |
| LOC_Os08g30020.3 | membrane protein, putative, expressed                                                     | Chr8  | 18452698 | 18458174 + | 13 | 2455 | -7.25 |
| LOC_Os01g36240.1 | peroxidase precursor, putative, expressed                                                 | Chr1  | 20061961 | 20066530 + | 4  | 1594 | -7.22 |
| LOC_Os10g11889.2 | expressed protein                                                                         | Chr10 | 6597053  | 6599560 -  | 2  | 509  | -7.20 |
| LOC_Os10g11889.1 | expressed protein                                                                         | Chr10 | 6597053  | 6599557 -  | 3  | 625  | -7.20 |
| LOC_Os11g34920.1 | stripe rust resistance protein Yr10, putative, expressed                                  | Chr11 | 20461110 | 20464673 + | 4  | 3399 | -7.20 |
| LOC_Os03g63390.1 | plastocyanin-like domain containing protein, putative, expressed                          | Chr3  | 35820760 | 35821532 + | 1  | 805  | -7.20 |
| LOC_Os11g15624.3 | expressed protein                                                                         | Chr11 | 8864461  | 8867281 -  | 2  | 821  | -7.18 |
| LOC_Os04g25650.1 | cysteine-rich receptor-like protein kinase, putative, expressed                           | Chr4  | 14863453 | 14864827 - | 1  | 1407 | -7.15 |
| LOC_Os10g39980.1 | expressed protein                                                                         | Chr10 | 21417293 | 21419897 + | 3  | 2217 | -7.14 |
| LOC_Os10g41040.2 | ternary complex factor MIP1, putative, expressed                                          | Chr10 | 22039379 | 22043925 - | 10 | 3090 | -7.14 |
| LOC_Os11g39190.2 | NB-ARC domain containing protein, putative, expressed                                     | Chr11 | 23333663 | 23337423 + | 5  | 3533 | -7.14 |
| LOC_Os11g39190.3 | NB-ARC domain containing protein, putative, expressed                                     | Chr11 | 23333672 | 23337423 + | 4  | 3567 | -7.14 |
| LOC_Os11g39190.1 | NB-ARC domain containing protein, putative, expressed                                     | Chr11 | 23333672 | 23337437 + | 4  | 3615 | -7.14 |
| LOC_Os11g39190.4 | NB-ARC domain containing protein, putative, expressed                                     | Chr11 | 23333663 | 23337423 + | 3  | 3690 | -7.14 |
| LOC_Os05g37130.2 | glycosyl hydrolases family 17, putative, expressed                                        | Chr5  | 21699329 | 21702589 - | 2  | 2851 | -7.12 |
| LOC_Os05g37130.5 | glycosyl hydrolases family 17, putative, expressed                                        | Chr5  | 21699306 | 21703565 - | 3  | 2949 | -7.12 |
| LOC_Os03g21590.1 | expressed protein                                                                         | Chr3  | 12327635 | 12330577 - | 6  | 1086 | -7.12 |
| LOC_Os03g22050.4 | CAMK_KIN1/SNF1/Nim1_like.16 - CAMK includes calcium/calmodulin dependent protein kinases, | Chr3  | 12630705 | 12634427 - | 2  | 2832 | -7.10 |
| LOC_Os03g22050.2 | CAMK_KIN1/SNF1/Nim1_like.16 - CAMK includes calcium/calmodulin dependent protein kinases, | Chr3  | 12630705 | 12635182 - | 2  | 3818 | -7.10 |
| LOC_Os03g22050.1 | CAMK_KIN1/SNF1/Nim1_like.16 - CAMK includes calcium/calmodulin dependent protein kinases, | Chr3  | 12630705 | 12635182 - | 2  | 3824 | -7.10 |
| LOC_Os03g22050.3 | CAMK_KIN1/SNF1/Nim1_like.16 - CAMK includes calcium/calmodulin dependent protein kinases, | Chr3  | 12630705 | 12634427 - | 1  | 3755 | -7.08 |
| LOC_Os10g02070.1 | peroxidase precursor, putative, expressed                                                 | Chr10 | 677086   | 678882 -   | 4  | 1413 | -7.07 |
| LOC_Os05g04410.1 | peroxidase precursor, putative, expressed                                                 | Chr5  | 2027782  | 2030203 +  | 2  | 1611 | -7.01 |
| LOC_Os11g11960.1 | disease resistance protein RPM1, putative, expressed                                      | Chr11 | 6638262  | 6640922 -  | 1  | 2693 | -7.00 |
| LOC_Os05g36310.1 | zinc finger, C3HC4 type domain containing protein, expressed                              | Chr5  | 21509382 | 21510614 - | 1  | 1265 | -6.99 |
| LOC_Os05g37130.3 | glycosyl hydrolases family 17, putative, expressed                                        | Chr5  | 21699306 | 21703565 - | 4  | 1850 | -6.97 |
| LOC_Os05g37130.4 | glycosyl hydrolases family 17, putative, expressed                                        | Chr5  | 21699329 | 21703565 - | 4  | 2807 | -6.97 |
| LOC_Os05g27034.1 | transposon protein, putative, CACTA, En/Spm sub-class, expressed                          | Chr5  | 15717870 | 15721581 + | 7  | 2843 | -6.96 |
| LOC_Os03g12660.1 | cytochrome P450, putative, expressed                                                      | Chr3  | 6737549  | 6744506 +  | 8  | 2206 | -6.94 |
| LOC_Os05g37130.1 | glycosyl hydrolases family 17, putative, expressed                                        | Chr5  | 21699329 | 21703565 - | 2  | 3368 | -6.90 |
| LOC_Os01g55510.1 | dynein light chain type 1 domain containing protein, expressed                            | Chr1  | 31981931 | 31982832 + | 2  | 782  | -6.90 |
| LOC_Os04g15690.1 | DSBA-like thioredoxin domain containing protein, expressed                                | Chr4  | 8528512  | 8533183 +  | 4  | 1263 | -6.89 |
| LOC_Os06g38950.1 | ABC transporter, ATP-binding protein, putative, expressed                                 | Chr6  | 23105225 | 23113098 - | 18 | 3865 | -6.85 |
| LOC_Os04g14150.1 | dehydration response related protein, putative, expressed                                 | Chr4  | 7913767  | 7915304 +  | 3  | 1435 | -6.84 |

|                  |                                                                                           |       |          |            |    |      |       |
|------------------|-------------------------------------------------------------------------------------------|-------|----------|------------|----|------|-------|
| LOC_Os11g35040.1 | aminotransferase, classes I and II, domain containing protein, expressed                  | Chr11 | 20525547 | 20529233 - | 7  | 1830 | -6.83 |
| LOC_Os11g14570.1 | expressed protein                                                                         | Chr11 | 8198057  | 8201966 -  | 5  | 2895 | -6.82 |
| LOC_Os11g14570.2 | expressed protein                                                                         | Chr11 | 8198057  | 8201961 -  | 5  | 2886 | -6.82 |
| LOC_Os08g30020.4 | membrane protein, putative, expressed                                                     | Chr8  | 18454797 | 18458174 + | 10 | 2459 | -6.81 |
| LOC_Os01g52130.1 | sulfate transporter, putative, expressed                                                  | Chr1  | 29987911 | 29994141 + | 12 | 3256 | -6.80 |
| LOC_Os09g17152.1 | OsFBX319 - F-box domain containing protein, expressed                                     | Chr9  | 10522922 | 10524537 - | 1  | 1648 | -6.80 |
| LOC_Os11g35200.1 | retrotransposon protein, putative, unclassified, expressed                                | Chr11 | 20637623 | 20642585 - | 6  | 4302 | -6.78 |
| LOC_Os06g44010.1 | WRKY28, expressed                                                                         | Chr6  | 26509919 | 26511699 - | 3  | 1689 | -6.77 |
| LOC_Os03g56430.1 | expressed protein                                                                         | Chr3  | 32164807 | 32168533 + | 5  | 3390 | -6.77 |
| LOC_Os08g09060.1 | Cupin domain containing protein, expressed                                                | Chr8  | 5260152  | 5261299 +  | 2  | 1021 | -6.76 |
| LOC_Os03g13210.1 | peroxidase precursor, putative, expressed                                                 | Chr3  | 7128181  | 7130342 -  | 4  | 1617 | -6.73 |
| LOC_Os06g09350.1 | expressed protein                                                                         | Chr6  | 4703899  | 4704882 -  | 3  | 804  | -6.72 |
| LOC_Os07g09490.1 | ATPase, putative, expressed                                                               | Chr7  | 5009352  | 5011123 -  | 1  | 1804 | -6.71 |
| LOC_Os05g35100.1 | transposon protein, putative, CACTA, En/Spm sub-class, expressed                          | Chr5  | 20839850 | 20843090 - | 4  | 2955 | -6.70 |
| LOC_Os05g05060.1 | expressed protein                                                                         | Chr5  | 2464317  | 2465040 -  | 1  | 756  | -6.69 |
| LOC_Os11g15624.1 | expressed protein                                                                         | Chr11 | 8864471  | 8867281 -  | 3  | 930  | -6.68 |
| LOC_Os11g15624.2 | expressed protein                                                                         | Chr11 | 8864471  | 8867044 -  | 3  | 1035 | -6.68 |
| LOC_Os02g35820.2 | retrotransposon protein, putative, unclassified, expressed                                | Chr2  | 21518767 | 21523578 + | 2  | 4582 | -6.65 |
| LOC_Os02g35820.1 | retrotransposon protein, putative, unclassified, expressed                                | Chr2  | 21518767 | 21523578 + | 1  | 4844 | -6.65 |
| LOC_Os11g37774.1 | stripe rust resistance protein Yr10, putative, expressed                                  | Chr11 | 22351283 | 22356398 + | 5  | 3154 | -6.65 |
| LOC_Os10g38360.1 | glutathione S-transferase, putative, expressed                                            | Chr10 | 20498004 | 20499097 + | 2  | 1052 | -6.59 |
| LOC_Os09g39770.1 | C2 domain containing protein, putative, expressed                                         | Chr9  | 22805610 | 22807049 - | 1  | 1472 | -6.59 |
| LOC_Os09g39760.1 | pectinesterase, putative, expressed                                                       | Chr9  | 22804668 | 22807049 + | 1  | 2414 | -6.59 |
| LOC_Os01g73940.1 | expressed protein                                                                         | Chr1  | 42838969 | 42839550 + | 1  | 614  | -6.58 |
| LOC_Os11g45050.1 | NBS-LRR disease resistance protein, putative, expressed                                   | Chr11 | 27261093 | 27264194 + | 1  | 3134 | -6.57 |
| LOC_Os03g58790.1 | ATPase, putative, expressed                                                               | Chr3  | 33482034 | 33484155 + | 1  | 2154 | -6.53 |
| LOC_Os07g05620.2 | CAMK_KIN1/SNF1/Nim1_like.28 - CAMK includes calcium/calmodulin dependent protein kinases, | Chr7  | 2643540  | 2647873 -  | 14 | 2436 | -6.53 |
| LOC_Os07g05620.1 | CAMK_KIN1/SNF1/Nim1_like.28 - CAMK includes calcium/calmodulin dependent protein kinases, | Chr7  | 2643540  | 2647873 -  | 14 | 2439 | -6.53 |
| LOC_Os12g05260.1 | phytosulfokines precursor, putative, expressed                                            | Chr12 | 2338072  | 2339171 +  | 2  | 1049 | -6.50 |
| LOC_Os04g05650.1 | expressed protein                                                                         | Chr4  | 2890372  | 2891360 -  | 4  | 713  | -6.50 |
| LOC_Os10g04060.1 | powdery mildew resistance protein PM3b, putative, expressed                               | Chr10 | 1871009  | 1875535 -  | 3  | 3921 | -6.49 |
| LOC_Os11g33120.3 | respiratory burst oxidase, putative, expressed                                            | Chr11 | 19588956 | 19594951 - | 7  | 3084 | -6.47 |
| LOC_Os12g05870.1 | Cupin domain containing protein, expressed                                                | Chr12 | 2696407  | 2697214 -  | 2  | 754  | -6.42 |
| LOC_Os08g44360.1 | male sterility protein 2, putative, expressed                                             | Chr8  | 27916313 | 27922617 + | 7  | 2252 | -6.40 |
| LOC_Os04g47780.1 | transmembrane amino acid transporter protein, putative, expressed                         | Chr4  | 28341594 | 28343271 - | 1  | 1710 | -6.40 |
| LOC_Os03g43440.1 | CAMK_KIN1/SNF1/Nim1_like.17 - CAMK includes calcium/calmodulin dependent protein kinases, | Chr3  | 24226224 | 24227930 - | 1  | 1739 | -6.38 |
| LOC_Os05g15770.1 | glycosyl hydrolase, putative, expressed                                                   | Chr5  | 8902479  | 8903793 -  | 1  | 1347 | -6.37 |
| LOC_Os02g37250.1 | hypothetical protein                                                                      | Chr2  | 22509898 | 22510548 - | 2  | 274  | -6.37 |
| LOC_Os01g72834.1 | RNA recognition motif containing protein, putative, expressed                             | Chr1  | 42247696 | 42255403 + | 6  | 2781 | -6.36 |
| LOC_Os08g33479.1 | expressed protein                                                                         | Chr8  | 20883923 | 20886243 + | 2  | 1708 | -6.35 |
| LOC_Os05g06780.1 | LTPL104 - Protease inhibitor/seed storage/LTP family protein precursor, expressed         | Chr5  | 3539563  | 3540972 -  | 2  | 798  | -6.32 |
| LOC_Os07g23640.1 | retrotransposon protein, putative, Ty3-gypsy subclass, expressed                          | Chr7  | 13354097 | 13355297 - | 1  | 1233 | -6.31 |
| LOC_Os01g71114.1 | disease resistance protein RGA4, putative, expressed                                      | Chr1  | 41159307 | 41163822 - | 4  | 2225 | -6.30 |
| LOC_Os02g20640.1 | retrotransposon protein, putative, unclassified, expressed                                | Chr2  | 12161803 | 12163683 - | 5  | 1390 | -6.28 |
| LOC_Os11g33120.1 | respiratory burst oxidase, putative, expressed                                            | Chr11 | 19588956 | 19596476 - | 10 | 4002 | -6.26 |

|                  |                                                                                                 |       |          |            |    |      |       |
|------------------|-------------------------------------------------------------------------------------------------|-------|----------|------------|----|------|-------|
| LOC_Os01g19260.1 | ATPase, putative, expressed                                                                     | Chr1  | 10891810 | 10893810 + | 2  | 1991 | -6.24 |
| LOC_Os01g71820.1 | glycosyl hydrolases family 17, putative, expressed                                              | Chr1  | 41597270 | 41598692 - | 2  | 1294 | -6.24 |
| LOC_Os02g31080.1 | hydroxyproline-rich glycoprotein family protein, putative, expressed                            | Chr2  | 18575033 | 18581693 - | 11 | 2992 | -6.24 |
| LOC_Os10g31320.1 | retrotransposon protein, putative, unclassified, expressed                                      | Chr10 | 16426002 | 16426931 - | 1  | 962  | -6.22 |
| LOC_Os11g15040.2 | S-adenosyl-L-methionine%3Abenzoic acid/salicylic acid carboxyl methyltransferase, putative, exp | Chr11 | 8466832  | 8469354 +  | 4  | 1497 | -6.22 |
| LOC_Os11g15040.1 | S-adenosyl-L-methionine%3Abenzoic acid/salicylic acid carboxyl methyltransferase, putative, exp | Chr11 | 8466832  | 8469354 +  | 4  | 1502 | -6.22 |
| LOC_Os11g15040.3 | S-adenosyl-L-methionine%3Abenzoic acid/salicylic acid carboxyl methyltransferase, putative, exp | Chr11 | 8466832  | 8469354 +  | 3  | 1577 | -6.22 |
| LOC_Os11g15040.4 | S-adenosyl-L-methionine%3Abenzoic acid/salicylic acid carboxyl methyltransferase, putative, exp | Chr11 | 8466832  | 8469354 +  | 3  | 1582 | -6.22 |
| LOC_Os11g15040.5 | S-adenosyl-L-methionine%3Abenzoic acid/salicylic acid carboxyl methyltransferase, putative, exp | Chr11 | 8466832  | 8469354 +  | 2  | 1864 | -6.22 |
| LOC_Os11g41870.1 | transporter family protein, putative, expressed                                                 | Chr11 | 25175014 | 25176821 - | 2  | 1781 | -6.19 |
| LOC_Os07g17250.1 | disease resistance RPP13-like protein 1, putative, expressed                                    | Chr7  | 10173157 | 10176827 + | 1  | 3703 | -6.18 |
| LOC_Os04g39320.2 | expressed protein                                                                               | Chr4  | 23408376 | 23410250 - | 3  | 1300 | -6.18 |
| LOC_Os07g40300.1 | ZOS7-10 - C2H2 zinc finger protein, expressed                                                   | Chr7  | 24164226 | 24165041 + | 1  | 848  | -6.13 |
| LOC_Os08g36510.1 | retrotransposon protein, putative, unclassified, expressed                                      | Chr8  | 23058865 | 23060076 + | 3  | 1011 | -6.13 |
| LOC_Os02g09740.1 | STRUBBELIG-RECEPTOR FAMILY 7 precursor, putative, expressed                                     | Chr2  | 5019765  | 5028028 +  | 16 | 3416 | -6.12 |
| LOC_Os02g09740.2 | STRUBBELIG-RECEPTOR FAMILY 7 precursor, putative, expressed                                     | Chr2  | 5019765  | 5028028 +  | 16 | 3413 | -6.12 |
| LOC_Os04g44510.1 | GEM, putative, expressed                                                                        | Chr4  | 26347311 | 26348503 - | 2  | 1139 | -6.12 |
| LOC_Os12g15470.2 | OsSCP65 - Putative Serine Carboxypeptidase homologue, expressed                                 | Chr12 | 8829523  | 8834630 -  | 14 | 2476 | -6.09 |
| LOC_Os12g15470.1 | OsSCP65 - Putative Serine Carboxypeptidase homologue, expressed                                 | Chr12 | 8829523  | 8834630 -  | 14 | 2509 | -6.09 |
| LOC_Os02g57720.1 | aquaporin protein, putative, expressed                                                          | Chr2  | 35349673 | 35351454 + | 2  | 1613 | -6.08 |
| LOC_Os06g21690.1 | expressed protein                                                                               | Chr6  | 12537158 | 12538578 + | 1  | 1453 | -6.04 |
| LOC_Os04g31030.1 | nitrate-induced NOI protein, expressed                                                          | Chr4  | 18547278 | 18550982 + | 4  | 1986 | -6.03 |
| LOC_Os07g08750.1 | STE_PAK_Ste20_Slob_Wnk.1 - STE kinases include homologs to sterile 7, sterile 11 and sterile 20 | Chr7  | 4498924  | 4501918 -  | 5  | 2754 | -6.03 |
| LOC_Os12g31850.2 | ureide permease, putative, expressed                                                            | Chr12 | 19161734 | 19165297 - | 8  | 2557 | -6.00 |
| LOC_Os03g58580.1 | nodulin, putative, expressed                                                                    | Chr3  | 33360063 | 33362393 + | 1  | 2363 | -5.99 |
| LOC_Os09g25740.1 | expressed protein                                                                               | Chr9  | 15438141 | 15440358 + | 3  | 2117 | -5.98 |
| LOC_Os07g09480.1 | ATPase, putative, expressed                                                                     | Chr7  | 5003872  | 5005835 +  | 1  | 1996 | -5.97 |
| LOC_Os11g02305.1 | expressed protein                                                                               | Chr11 | 655459   | 660185 -   | 3  | 1965 | -5.95 |
| LOC_Os08g45030.1 | multidrug resistance protein, putative, expressed                                               | Chr8  | 28264266 | 28270129 + | 3  | 4714 | -5.93 |
| LOC_Os07g23340.1 | male sterility protein, putative, expressed                                                     | Chr7  | 13149738 | 13153339 - | 8  | 2000 | -5.92 |
| LOC_Os02g33820.1 | abscisic stress-ripening, putative, expressed                                                   | Chr2  | 20165589 | 20166668 - | 2  | 926  | -5.92 |
| LOC_Os03g12110.1 | homocysteine S-methyltransferase protein, putative, expressed                                   | Chr3  | 6354859  | 6357807 +  | 7  | 1653 | -5.91 |
| LOC_Os03g12110.2 | homocysteine S-methyltransferase protein, putative, expressed                                   | Chr3  | 6354859  | 6357792 +  | 6  | 1779 | -5.91 |
| LOC_Os06g07030.1 | AP2 domain containing protein, expressed                                                        | Chr6  | 3337083  | 3338612 +  | 1  | 1562 | -5.91 |
| LOC_Os11g44990.1 | NB-ARC domain containing protein, expressed                                                     | Chr11 | 27242070 | 27245161 + | 3  | 3027 | -5.91 |
| LOC_Os10g31320.2 | retrotransposon protein, putative, unclassified, expressed                                      | Chr10 | 16426002 | 16426928 - | 2  | 655  | -5.90 |
| LOC_Os05g12280.1 | clumping factor A precursor, putative, expressed                                                | Chr5  | 7049881  | 7050866 -  | 1  | 1018 | -5.89 |
| LOC_Os10g02350.1 | transmembrane 9 superfamily member, putative, expressed                                         | Chr10 | 840040   | 843859 -   | 7  | 2457 | -5.89 |
| LOC_Os04g50940.2 | peptide transporter PTR2, putative, expressed                                                   | Chr4  | 30156252 | 30159323 + | 1  | 3104 | -5.88 |
| LOC_Os06g50410.1 | DUF677 domain containing protein, putative, expressed                                           | Chr6  | 30521808 | 30523034 - | 1  | 1259 | -5.88 |
| LOC_Os08g33479.2 | expressed protein                                                                               | Chr8  | 20883923 | 20886243 + | 3  | 877  | -5.85 |
| LOC_Os11g37700.1 | pleiotropic drug resistance protein, putative, expressed                                        | Chr11 | 22272820 | 22282438 - | 20 | 5464 | -5.85 |
| LOC_Os12g01140.1 | AGC_PVPK_like_kin82y.2 - ACG kinases include homologs to PKA, PKG and PKC, expressed            | Chr12 | 75281    | 89965 +    | 23 | 4101 | -5.83 |
| LOC_Os12g01140.2 | AGC_PVPK_like_kin82y.2 - ACG kinases include homologs to PKA, PKG and PKC, expressed            | Chr12 | 75283    | 89965 +    | 22 | 4129 | -5.83 |
| LOC_Os12g01140.3 | AGC_PVPK_like_kin82y.2 - ACG kinases include homologs to PKA, PKG and PKC, expressed            | Chr12 | 75283    | 89965 +    | 21 | 4204 | -5.83 |

|                  |                                                                                         |       |          |            |    |      |       |
|------------------|-----------------------------------------------------------------------------------------|-------|----------|------------|----|------|-------|
| LOC_Os04g38860.1 | expressed protein                                                                       | Chr4  | 23097996 | 23100389 - | 7  | 1884 | -5.83 |
| LOC_Os09g30414.1 | aspartic proteinase nepenthesin-2 precursor, putative, expressed                        | Chr9  | 18521580 | 18524733 + | 2  | 2502 | -5.79 |
| LOC_Os05g17604.3 | SHR5-receptor-like kinase, putative, expressed                                          | Chr5  | 10112481 | 10126224 - | 23 | 5835 | -5.77 |
| LOC_Os03g27230.1 | phospho-2-dehydro-3-deoxyheptonate aldolase, chloroplast precursor, putative, expressed | Chr3  | 15603830 | 15608753 + | 5  | 2277 | -5.77 |
| LOC_Os06g50659.1 | UPF0496 protein 2, putative, expressed                                                  | Chr6  | 30664226 | 30664912 + | 1  | 719  | -5.76 |
| LOC_Os06g50809.1 | UPF0496 protein 2, putative, expressed                                                  | Chr6  | 30748991 | 30749677 + | 1  | 719  | -5.76 |
| LOC_Os03g16950.1 | cysteine-rich repeat secretory protein 55 precursor, putative, expressed                | Chr3  | 9421689  | 9422925 -  | 2  | 1207 | -5.75 |
| LOC_Os01g18080.1 | retrotransposon protein, putative, unclassified, expressed                              | Chr1  | 10133857 | 10135806 + | 1  | 1982 | -5.73 |
| LOC_Os11g02300.1 | CPuORF36 - conserved peptide uORF-containing transcript, expressed                      | Chr11 | 654974   | 661236 -   | 3  | 3501 | -5.72 |
| LOC_Os07g09420.1 | ATPase, putative, expressed                                                             | Chr7  | 4969373  | 4971156 +  | 1  | 1816 | -5.71 |
| LOC_Os05g17604.1 | SHR5-receptor-like kinase, putative, expressed                                          | Chr5  | 10112499 | 10126194 - | 24 | 3958 | -5.68 |
| LOC_Os06g01760.1 | ligA, putative, expressed                                                               | Chr6  | 438684   | 441553 -   | 2  | 2287 | -5.67 |
| LOC_Os12g16290.1 | isoflavone reductase, putative, expressed                                               | Chr12 | 9315228  | 9318123 -  | 1  | 2928 | -5.67 |
| LOC_Os01g74410.2 | MYB family transcription factor, putative, expressed                                    | Chr1  | 43096392 | 43097974 + | 1  | 1615 | -5.65 |
| LOC_Os01g12410.1 | receptor-like protein kinase, putative, expressed                                       | Chr1  | 6781919  | 6784207 -  | 1  | 2321 | -5.61 |
| LOC_Os11g44960.1 | NBS-LRR disease resistance protein, putative, expressed                                 | Chr11 | 27221855 | 27226087 + | 2  | 3334 | -5.61 |
| LOC_Os10g03400.2 | phosphatidylinositol transfer, putative, expressed                                      | Chr10 | 1447360  | 1451348 -  | 14 | 2449 | -5.61 |
| LOC_Os07g48870.1 | MYB family transcription factor, putative, expressed                                    | Chr7  | 29242088 | 29243628 + | 2  | 1528 | -5.61 |
| LOC_Os08g02110.1 | peroxidase precursor, putative, expressed                                               | Chr8  | 697180   | 698615 +   | 1  | 1468 | -5.60 |
| LOC_Os02g13510.1 | receptor-like protein kinase 5 precursor, putative, expressed                           | Chr2  | 7220338  | 7224509 -  | 2  | 4123 | -5.59 |
| LOC_Os05g29170.1 | expressed protein                                                                       | Chr5  | 17135217 | 17135905 + | 1  | 721  | -5.59 |
| LOC_Os04g35010.1 | helix-loop-helix DNA-binding domain containing protein, expressed                       | Chr4  | 21276704 | 21281674 + | 3  | 3267 | -5.58 |
| LOC_Os08g44370.1 | inosine-uridine preferring nucleoside hydrolase family protein, putative, expressed     | Chr8  | 27922826 | 27926814 - | 9  | 1967 | -5.58 |
| LOC_Os01g74410.1 | MYB family transcription factor, putative, expressed                                    | Chr1  | 43096401 | 43097974 + | 2  | 1427 | -5.56 |
| LOC_Os07g23660.1 | retrotransposon protein, putative, unclassified, expressed                              | Chr7  | 13366416 | 13367542 + | 1  | 1159 | -5.55 |
| LOC_Os06g13220.1 | expressed protein                                                                       | Chr6  | 7260407  | 7264016 +  | 5  | 1273 | -5.55 |
| LOC_Os06g01760.2 | ligA, putative, expressed                                                               | Chr6  | 438684   | 441170 -   | 2  | 2133 | -5.55 |
| LOC_Os03g56330.1 | expressed protein                                                                       | Chr3  | 32113257 | 32113860 + | 2  | 572  | -5.54 |
| LOC_Os04g01490.2 | zinc finger, C3HC4 type, domain containing protein, expressed                           | Chr4  | 333687   | 337087 +   | 8  | 2224 | -5.53 |
| LOC_Os02g53380.1 | expressed protein                                                                       | Chr2  | 32670668 | 32673918 - | 5  | 3009 | -5.52 |
| LOC_Os04g01490.1 | zinc finger, C3HC4 type, domain containing protein, expressed                           | Chr4  | 333972   | 337060 +   | 8  | 2248 | -5.50 |
| LOC_Os11g02300.2 | CPuORF36 - conserved peptide uORF-containing transcript, expressed                      | Chr11 | 654974   | 661236 -   | 2  | 5362 | -5.50 |
| LOC_Os12g15314.1 | staphylococcal nuclease homologue, putative, expressed                                  | Chr12 | 8726013  | 8737949 -  | 11 | 2209 | -5.46 |
| LOC_Os05g01820.1 | cytochrome b5-like Heme/Steroid binding domain containing protein, expressed            | Chr5  | 492255   | 494332 +   | 3  | 1105 | -5.45 |
| LOC_Os11g01140.3 | AGC_PVPK_like_kin82y.18 - ACG kinases include homologs to PKA, PKG and PKC, expressed   | Chr11 | 79187    | 94113 +    | 23 | 4268 | -5.44 |
| LOC_Os11g01140.1 | AGC_PVPK_like_kin82y.18 - ACG kinases include homologs to PKA, PKG and PKC, expressed   | Chr11 | 79187    | 94113 +    | 23 | 4312 | -5.44 |
| LOC_Os11g01140.2 | AGC_PVPK_like_kin82y.18 - ACG kinases include homologs to PKA, PKG and PKC, expressed   | Chr11 | 79187    | 94113 +    | 22 | 4341 | -5.44 |
| LOC_Os11g45180.1 | NBS-LRR disease resistance protein, putative, expressed                                 | Chr11 | 27342028 | 27345123 + | 1  | 3128 | -5.44 |
| LOC_Os01g64120.1 | 2Fe-2S iron-sulfur cluster binding domain containing protein, expressed                 | Chr1  | 37241155 | 37242103 + | 1  | 981  | -5.44 |
| LOC_Os07g29720.1 | expressed protein                                                                       | Chr7  | 17471134 | 17472072 - | 2  | 523  | -5.43 |
| LOC_Os11g07950.1 | expressed protein                                                                       | Chr11 | 4122400  | 4123528 -  | 1  | 1161 | -5.43 |
| LOC_Os08g24200.1 | expressed protein                                                                       | Chr8  | 14607854 | 14608128 - | 2  | 223  | -5.42 |
| LOC_Os05g37190.1 | ZOS5-08 - C2H2 zinc finger protein, expressed                                           | Chr5  | 21737275 | 21739746 + | 2  | 1900 | -5.42 |
| LOC_Os06g11210.1 | 12-oxophytodienoate reductase, putative, expressed                                      | Chr6  | 5884474  | 5886141 -  | 2  | 1592 | -5.41 |
| LOC_Os01g71810.1 | glycosyl hydrolases family 17, putative, expressed                                      | Chr1  | 41592216 | 41594985 - | 2  | 1275 | -5.38 |

|                  |                                                                       |       |          |            |    |      |       |
|------------------|-----------------------------------------------------------------------|-------|----------|------------|----|------|-------|
| LOC_Os07g03458.1 | SCP-like extracellular protein, expressed                             | Chr7  | 1385404  | 1386096 +  | 1  | 725  | -5.36 |
| LOC_Os04g45130.1 | heavy-metal-associated domain-containing protein, putative, expressed | Chr4  | 26684582 | 26685645 - | 3  | 848  | -5.35 |
| LOC_Os07g46315.1 | expressed protein                                                     | Chr7  | 27626769 | 27627785 + | 2  | 388  | -5.35 |
| LOC_Os07g03368.1 | SCP-like extracellular protein, expressed                             | Chr7  | 1352321  | 1352930 +  | 1  | 642  | -5.34 |
| LOC_Os07g03279.1 | SCP-like extracellular protein, expressed                             | Chr7  | 1319031  | 1319803 +  | 1  | 805  | -5.34 |
| LOC_Os11g37860.1 | stripe rust resistance protein Yr10, putative, expressed              | Chr11 | 22427759 | 22435407 + | 6  | 3773 | -5.32 |
| LOC_Os07g37900.1 | retrotransposon protein, putative, unclassified, expressed            | Chr7  | 22738107 | 22746356 + | 11 | 6508 | -5.31 |
| LOC_Os03g47740.1 | homeodomain protein, putative, expressed                              | Chr3  | 27057031 | 27063684 - | 7  | 3118 | -5.30 |
| LOC_Os03g01365.1 | protein phosphatase-2c, putative, expressed                           | Chr3  | 277183   | 278705 -   | 3  | 712  | -5.29 |
| LOC_Os12g02100.2 | expressed protein                                                     | Chr12 | 632636   | 638030 +   | 13 | 2210 | -5.28 |
| LOC_Os12g02100.1 | expressed protein                                                     | Chr12 | 632401   | 638030 +   | 13 | 2436 | -5.28 |
| LOC_Os07g03467.1 | SCP-like extracellular protein, expressed                             | Chr7  | 1388413  | 1389436 -  | 1  | 1056 | -5.28 |
| LOC_Os03g47740.2 | homeodomain protein, putative, expressed                              | Chr3  | 27057559 | 27063684 - | 6  | 3181 | -5.26 |
| LOC_Os03g03700.2 | MLO domain containing protein, putative, expressed                    | Chr3  | 1644670  | 1648764 -  | 13 | 3063 | -5.23 |
| LOC_Os03g03700.1 | MLO domain containing protein, putative, expressed                    | Chr3  | 1644670  | 1648764 -  | 13 | 2914 | -5.23 |
| LOC_Os01g38980.2 | calmodulin-binding protein, putative, expressed                       | Chr1  | 21900045 | 21903309 - | 7  | 2618 | -5.21 |
| LOC_Os01g38980.1 | calmodulin-binding protein, putative, expressed                       | Chr1  | 21900050 | 21903309 - | 7  | 2608 | -5.21 |
| LOC_Os04g56100.1 | one cut domain family member 3, putative, expressed                   | Chr4  | 33415314 | 33416123 - | 1  | 842  | -5.21 |
| LOC_Os03g14460.1 | transposon protein, putative, CACTA, En/Spm sub-class, expressed      | Chr3  | 7859490  | 7860115 +  | 1  | 658  | -5.21 |
| LOC_Os08g31150.1 | retrotransposon protein, putative, unclassified, expressed            | Chr8  | 19249643 | 19257180 - | 7  | 6200 | -5.18 |
| LOC_Os04g41410.1 | expressed protein                                                     | Chr4  | 24550546 | 24553400 - | 4  | 2023 | -5.16 |
| LOC_Os08g35190.1 | auxin-repressed protein, putative, expressed                          | Chr8  | 22190136 | 22191839 + | 3  | 1242 | -5.16 |
| LOC_Os10g36703.1 | CPuORF40 - conserved peptide uORF-containing transcript, expressed    | Chr10 | 19631246 | 19632264 - | 1  | 1051 | -5.16 |
| LOC_Os01g03390.1 | BBT17 - Bowman-Birk type bran trypsin inhibitor precursor, expressed  | Chr1  | 1365508  | 1366503 -  | 1  | 1028 | -5.15 |
| LOC_Os03g19420.2 | nicotianamine synthase, putative, expressed                           | Chr3  | 10926469 | 10927950 + | 1  | 1514 | -5.15 |
| LOC_Os11g11890.1 | protein kinase domain containing protein, expressed                   | Chr11 | 6596374  | 6603010 +  | 12 | 2562 | -5.15 |
| LOC_Os08g35190.3 | auxin-repressed protein, putative, expressed                          | Chr8  | 22190140 | 22191734 + | 3  | 921  | -5.14 |
| LOC_Os01g03340.1 | BBT14 - Bowman-Birk type bran trypsin inhibitor precursor, expressed  | Chr1  | 1347567  | 1348786 -  | 1  | 1252 | -5.14 |
| LOC_Os03g47740.3 | homeodomain protein, putative, expressed                              | Chr3  | 27057559 | 27062890 - | 6  | 2844 | -5.14 |
| LOC_Os01g71350.1 | glycosyl hydrolases family 17, putative, expressed                    | Chr1  | 41349731 | 41351148 + | 2  | 1338 | -5.13 |
| LOC_Os12g10330.1 | NB-ARC domain containing protein, expressed                           | Chr12 | 5469044  | 5471369 -  | 1  | 2358 | -5.13 |
| LOC_Os04g58280.2 | stem-specific protein TSJT1, putative, expressed                      | Chr4  | 34694304 | 34697202 - | 4  | 2537 | -5.12 |
| LOC_Os03g03880.1 | protein kinase, putative, expressed                                   | Chr3  | 1765300  | 1770693 +  | 5  | 2895 | -5.12 |
| LOC_Os12g44190.1 | ATPase 3, putative, expressed                                         | Chr12 | 27412212 | 27414380 - | 2  | 2137 | -5.10 |
| LOC_Os01g04350.1 | hsp20/alpha crystallin family protein, putative, expressed            | Chr1  | 1941003  | 1941953 +  | 1  | 983  | -5.08 |
| LOC_Os10g37500.1 | AAA-type ATPase family protein, putative, expressed                   | Chr10 | 20081776 | 20083719 - | 1  | 1976 | -5.08 |
| LOC_Os08g32180.1 | retrotransposon protein, putative, unclassified, expressed            | Chr8  | 19958778 | 19960391 + | 1  | 1646 | -5.08 |
| LOC_Os08g39370.1 | citrate transporter, putative, expressed                              | Chr8  | 24882925 | 24886350 + | 5  | 2692 | -5.07 |
| LOC_Os08g35190.2 | auxin-repressed protein, putative, expressed                          | Chr8  | 22190136 | 22191734 + | 2  | 1566 | -5.07 |
| LOC_Os09g38390.1 | octicosapeptide/Phox/Bem1p, putative, expressed                       | Chr9  | 22098463 | 22101177 + | 2  | 2513 | -5.04 |
| LOC_Os05g41290.1 | disease resistance RPP13-like protein 1, putative, expressed          | Chr5  | 24184447 | 24189203 + | 2  | 3845 | -4.99 |
| LOC_Os03g56250.1 | LRR receptor-like protein kinase, putative, expressed                 | Chr3  | 32043843 | 32048414 - | 4  | 2937 | -4.97 |
| LOC_Os01g02290.1 | Ser/Thr receptor-like kinase, putative, expressed                     | Chr1  | 720629   | 723317 -   | 3  | 2197 | -4.97 |
| LOC_Os01g14550.1 | pathogen-related protein, putative, expressed                         | Chr1  | 8159849  | 8161554 +  | 4  | 1170 | -4.96 |
| LOC_Os04g58280.1 | stem-specific protein TSJT1, putative, expressed                      | Chr4  | 34694304 | 34697202 - | 3  | 2716 | -4.96 |



|                  |                                                                                          |       |          |            |    |      |       |
|------------------|------------------------------------------------------------------------------------------|-------|----------|------------|----|------|-------|
| LOC_Os03g55800.1 | cytochrome P450, putative, expressed                                                     | Chr3  | 31764987 | 31766985 - | 1  | 2031 | -4.96 |
| LOC_Os03g52160.1 | regulatory protein, putative, expressed                                                  | Chr3  | 29948932 | 29951110 + | 3  | 1838 | -4.95 |
| LOC_Os06g17900.1 | disease resistance protein RPM1, putative, expressed                                     | Chr6  | 10387509 | 10390465 + | 2  | 2926 | -4.95 |
| LOC_Os01g02290.2 | Ser/Thr receptor-like kinase, putative, expressed                                        | Chr1  | 720632   | 723317 -   | 4  | 2113 | -4.94 |
| LOC_Os03g29830.1 | expressed protein                                                                        | Chr3  | 16999140 | 17002312 + | 3  | 1191 | -4.93 |
| LOC_Os05g38264.1 | expressed protein                                                                        | Chr5  | 22436430 | 22437469 - | 1  | 1072 | -4.93 |
| LOC_Os04g59150.1 | peroxidase precursor, putative, expressed                                                | Chr4  | 35187373 | 35189338 - | 3  | 1813 | -4.91 |
| LOC_Os09g34250.1 | UDP-glucuronosyl and UDP-glucosyl transferase domain containing protein, expressed       | Chr9  | 20222174 | 20224114 + | 2  | 1915 | -4.91 |
| LOC_Os06g11310.1 | plastocyanin-like domain containing protein, putative, expressed                         | Chr6  | 5930399  | 5931984 -  | 2  | 984  | -4.91 |
| LOC_Os04g59150.2 | peroxidase precursor, putative, expressed                                                | Chr4  | 35187417 | 35189187 - | 4  | 1481 | -4.90 |
| LOC_Os12g01910.1 | pentatricopeptide, putative, expressed                                                   | Chr12 | 531180   | 535127 +   | 4  | 2792 | -4.90 |
| LOC_Os02g03840.2 | expressed protein                                                                        | Chr2  | 1617326  | 1630169 +  | 8  | 9720 | -4.89 |
| LOC_Os09g39960.1 | dynamamin family protein, putative, expressed                                            | Chr9  | 22911510 | 22916787 - | 15 | 2832 | -4.86 |
| LOC_Os04g57160.1 | flavonol synthase/flavanone 3-hydroxylase, putative, expressed                           | Chr4  | 34060040 | 34063474 + | 4  | 1506 | -4.82 |
| LOC_Os04g25730.1 | transposon protein, putative, CACTA, En/Spm sub-class, expressed                         | Chr4  | 14911887 | 14915108 - | 4  | 2979 | -4.82 |
| LOC_Os02g05365.1 | expressed protein                                                                        | Chr2  | 2577378  | 2578660 +  | 3  | 450  | -4.81 |
| LOC_Os07g26520.1 | expressed protein                                                                        | Chr7  | 15281842 | 15282673 - | 3  | 375  | -4.81 |
| LOC_Os12g36110.1 | calmodulin binding protein, putative, expressed                                          | Chr12 | 22132798 | 22136895 - | 11 | 3214 | -4.80 |
| LOC_Os04g35140.1 | OsSub41 - Putative Subtilisin homologue, expressed                                       | Chr4  | 21358864 | 21362109 + | 1  | 3278 | -4.79 |
| LOC_Os10g22460.1 | expressed protein                                                                        | Chr10 | 11629655 | 11634489 - | 9  | 2258 | -4.78 |
| LOC_Os12g10740.1 | leucine-rich repeat family protein, putative, expressed                                  | Chr12 | 5765954  | 5773383 +  | 19 | 4044 | -4.78 |
| LOC_Os01g29804.3 | expressed protein                                                                        | Chr1  | 16699521 | 16700745 + | 2  | 1137 | -4.77 |
| LOC_Os06g45890.1 | MYB family transcription factor, putative, expressed                                     | Chr6  | 27777556 | 27780778 + | 5  | 1674 | -4.77 |
| LOC_Os02g54820.1 | trehalose-6-phosphate synthase, putative, expressed                                      | Chr2  | 33569263 | 33574120 + | 4  | 3792 | -4.76 |
| LOC_Os02g56280.1 | zinc finger family protein, putative, expressed                                          | Chr2  | 34439761 | 34444762 - | 2  | 3395 | -4.75 |
| LOC_Os03g52170.1 | 4-hydroxy-3-methylbut-2-enyl diphosphate reductase, putative, expressed                  | Chr3  | 29950011 | 29953906 - | 10 | 2844 | -4.74 |
| LOC_Os09g32290.1 | FAD dependent oxidoreductase domain containing protein, expressed                        | Chr9  | 19272307 | 19273270 - | 1  | 996  | -4.73 |
| LOC_Os09g32290.2 | FAD dependent oxidoreductase domain containing protein, expressed                        | Chr9  | 19272307 | 19275775 - | 2  | 1615 | -4.73 |
| LOC_Os10g39420.1 | CAMK_CAMK_like.8 - CAMK includes calcium/calmodulin dependent protein kinases, expressed | Chr10 | 21027454 | 21032225 + | 8  | 2350 | -4.71 |
| LOC_Os05g43170.1 | calreticulin precursor protein, putative, expressed                                      | Chr5  | 25054711 | 25059191 + | 14 | 2336 | -4.71 |
| LOC_Os04g52640.1 | SHR5-receptor-like kinase, putative, expressed                                           | Chr4  | 31317589 | 31328040 - | 24 | 5212 | -4.71 |
| LOC_Os04g52640.3 | SHR5-receptor-like kinase, putative, expressed                                           | Chr4  | 31317589 | 31328040 - | 24 | 5186 | -4.71 |
| LOC_Os06g41450.1 | VQ domain containing protein, putative, expressed                                        | Chr6  | 24843679 | 24844760 - | 1  | 1114 | -4.68 |
| LOC_Os07g43770.3 | expressed protein                                                                        | Chr7  | 26189243 | 26190004 - | 2  | 740  | -4.67 |
| LOC_Os01g72370.3 | helix-loop-helix DNA-binding domain containing protein, expressed                        | Chr1  | 41971444 | 41978408 - | 4  | 2821 | -4.66 |
| LOC_Os02g10190.1 | DUF1680 domain containing protein, putative, expressed                                   | Chr2  | 5339008  | 5344518 +  | 12 | 3772 | -4.65 |
| LOC_Os01g72370.1 | helix-loop-helix DNA-binding domain containing protein, expressed                        | Chr1  | 41971514 | 41978408 - | 4  | 4224 | -4.65 |
| LOC_Os09g20930.1 | expressed protein                                                                        | Chr9  | 12600633 | 12602389 + | 1  | 1789 | -4.65 |
| LOC_Os11g10710.1 | protein kinase domain containing protein, expressed                                      | Chr11 | 5873795  | 5880713 -  | 13 | 2375 | -4.64 |
| LOC_Os04g08749.1 | expressed protein                                                                        | Chr4  | 4749120  | 4752352 +  | 5  | 1812 | -4.63 |
| LOC_Os11g12240.1 | retrotransposon protein, putative, unclassified, expressed                               | Chr11 | 6827132  | 6840671 +  | 3  | 2543 | -4.59 |
| LOC_Os07g43770.2 | expressed protein                                                                        | Chr7  | 26188128 | 26190004 - | 3  | 1216 | -4.56 |
| LOC_Os03g14950.1 | PLA IIIA/PLP7, putative, expressed                                                       | Chr3  | 8152544  | 8154731 +  | 2  | 2167 | -4.55 |
| LOC_Os02g54820.3 | trehalose-6-phosphate synthase, putative, expressed                                      | Chr2  | 33569263 | 33573174 + | 2  | 3618 | -4.54 |
| LOC_Os12g08130.1 | amino acid transporter, putative, expressed                                              | Chr12 | 4144535  | 4146619 -  | 3  | 1978 | -4.54 |

|                  |                                                                                    |       |          |            |    |      |       |
|------------------|------------------------------------------------------------------------------------|-------|----------|------------|----|------|-------|
| LOC_Os03g15170.1 | retrotransposon protein, putative, unclassified, expressed                         | Chr3  | 8290926  | 8292045 +  | 2  | 1117 | -4.53 |
| LOC_Os12g42840.1 | expressed protein                                                                  | Chr12 | 26618240 | 26621780 + | 8  | 2132 | -4.52 |
| LOC_Os06g43190.2 | retrotransposon protein, putative, unclassified, expressed                         | Chr6  | 25963873 | 25967328 - | 5  | 1693 | -4.51 |
| LOC_Os01g24710.1 | jacalin-like lectin domain containing protein, expressed                           | Chr1  | 13903153 | 13904729 - | 3  | 1015 | -4.50 |
| LOC_Os02g32009.1 | expressed protein                                                                  | Chr2  | 18908678 | 18909567 + | 1  | 922  | -4.50 |
| LOC_Os01g24710.4 | jacalin-like lectin domain containing protein, expressed                           | Chr1  | 13903153 | 13904715 - | 3  | 977  | -4.50 |
| LOC_Os01g24710.3 | jacalin-like lectin domain containing protein, expressed                           | Chr1  | 13903153 | 13904474 - | 3  | 1192 | -4.49 |
| LOC_Os01g24710.2 | jacalin-like lectin domain containing protein, expressed                           | Chr1  | 13903153 | 13904490 - | 2  | 1305 | -4.49 |
| LOC_Os07g49330.1 | phospholipase C, putative, expressed                                               | Chr7  | 29545825 | 29548981 - | 7  | 2604 | -4.49 |
| LOC_Os07g42500.1 | FYVE zinc finger domain containing protein, expressed                              | Chr7  | 25435731 | 25439801 + | 5  | 2178 | -4.48 |
| LOC_Os06g43190.1 | retrotransposon protein, putative, unclassified, expressed                         | Chr6  | 25963875 | 25967411 - | 7  | 1699 | -4.48 |
| LOC_Os06g43190.3 | retrotransposon protein, putative, unclassified, expressed                         | Chr6  | 25963875 | 25967409 - | 6  | 1732 | -4.48 |
| LOC_Os04g52640.2 | SHR5-receptor-like kinase, putative, expressed                                     | Chr4  | 31317589 | 31328040 - | 23 | 5635 | -4.48 |
| LOC_Os09g26620.3 | auxin-repressed protein, putative, expressed                                       | Chr9  | 16153180 | 16155170 + | 2  | 1705 | -4.48 |
| LOC_Os09g26620.5 | auxin-repressed protein, putative, expressed                                       | Chr9  | 16153176 | 16155170 + | 3  | 1530 | -4.48 |
| LOC_Os09g26620.1 | auxin-repressed protein, putative, expressed                                       | Chr9  | 16153179 | 16155170 + | 4  | 1444 | -4.48 |
| LOC_Os09g26620.2 | auxin-repressed protein, putative, expressed                                       | Chr9  | 16153177 | 16155170 + | 4  | 1432 | -4.48 |
| LOC_Os09g26620.4 | auxin-repressed protein, putative, expressed                                       | Chr9  | 16153180 | 16155170 + | 4  | 1225 | -4.48 |
| LOC_Os01g66110.1 | methyltransferase, putative, expressed                                             | Chr1  | 38386267 | 38391780 - | 9  | 3400 | -4.47 |
| LOC_Os02g54820.2 | trehalose-6-phosphate synthase, putative, expressed                                | Chr2  | 33569263 | 33573174 + | 3  | 3250 | -4.47 |
| LOC_Os01g66110.2 | methyltransferase, putative, expressed                                             | Chr1  | 38386267 | 38391315 - | 8  | 3406 | -4.47 |
| LOC_Os04g06734.1 | expressed protein                                                                  | Chr4  | 3539703  | 3547962 +  | 8  | 1357 | -4.46 |
| LOC_Os09g30400.3 | WRKY90, expressed                                                                  | Chr9  | 18496949 | 18500579 - | 6  | 2418 | -4.44 |
| LOC_Os04g52570.1 | expressed protein                                                                  | Chr4  | 31254841 | 31257934 - | 10 | 1924 | -4.43 |
| LOC_Os12g36690.1 | mia1, putative, expressed                                                          | Chr12 | 22477070 | 22481287 - | 3  | 3354 | -4.41 |
| LOC_Os08g43180.1 | expressed protein                                                                  | Chr8  | 27306256 | 27309652 - | 1  | 3429 | -4.39 |
| LOC_Os11g39510.1 | retrotransposon protein, putative, unclassified, expressed                         | Chr11 | 23522471 | 23530564 + | 8  | 5929 | -4.38 |
| LOC_Os06g22900.1 | transposon protein, putative, CACTA, En/Spm sub-class, expressed                   | Chr6  | 13371228 | 13375234 - | 4  | 1586 | -4.37 |
| LOC_Os05g36290.1 | actin, putative, expressed                                                         | Chr5  | 21500570 | 21504248 - | 5  | 2043 | -4.37 |
| LOC_Os02g43912.1 | ceramide kinase-related, putative, expressed                                       | Chr2  | 26507822 | 26509994 - | 7  | 1115 | -4.37 |
| LOC_Os05g02420.1 | expressed protein                                                                  | Chr5  | 801087   | 803464 +   | 1  | 2410 | -4.37 |
| LOC_Os05g36360.1 | U-box domain containing protein, expressed                                         | Chr5  | 21525165 | 21526787 + | 1  | 1655 | -4.37 |
| LOC_Os07g02970.1 | expressed protein                                                                  | Chr7  | 1106836  | 1108834 +  | 1  | 2031 | -4.35 |
| LOC_Os09g31210.1 | AGC_PVPK_like_CDK8.1 - ACG kinases include homologs to PKA, PKG and PKC, expressed | Chr9  | 18769773 | 18771506 + | 1  | 1766 | -4.35 |
| LOC_Os06g48530.1 | ZOS6-09 - C2H2 zinc finger protein, expressed                                      | Chr6  | 29357512 | 29364555 - | 12 | 3002 | -4.35 |
| LOC_Os07g01720.1 | expressed protein                                                                  | Chr7  | 428798   | 431747 +   | 3  | 2724 | -4.34 |
| LOC_Os09g04160.1 | expressed protein                                                                  | Chr9  | 2181578  | 2187534 -  | 6  | 2322 | -4.33 |
| LOC_Os08g32970.1 | annexin, putative, expressed                                                       | Chr8  | 20459698 | 20461621 + | 3  | 1370 | -4.32 |
| LOC_Os01g65790.1 | pectinesterase, putative, expressed                                                | Chr1  | 38206872 | 38211799 - | 2  | 2087 | -4.31 |
| LOC_Os09g25250.1 | transposon protein, putative, CACTA, En/Spm sub-class, expressed                   | Chr9  | 15119921 | 15123015 - | 2  | 3019 | -4.30 |
| LOC_Os05g02420.2 | expressed protein                                                                  | Chr5  | 801087   | 803464 +   | 2  | 1664 | -4.30 |
| LOC_Os06g43660.3 | inorganic H%2B pyrophosphatase, putative, expressed                                | Chr6  | 26272897 | 26278666 + | 7  | 2986 | -4.28 |
| LOC_Os09g04160.2 | expressed protein                                                                  | Chr9  | 2181578  | 2186451 -  | 5  | 2841 | -4.28 |
| LOC_Os09g22510.1 | expressed protein                                                                  | Chr9  | 13580163 | 13581415 + | 1  | 1285 | -4.27 |
| LOC_Os05g04700.1 | OsRC12-6 - Hydrophobic protein LTI6B, expressed                                    | Chr5  | 2219901  | 2220462 -  | 3  | 375  | -4.27 |

|                  |                                                                                |       |          |            |    |      |       |
|------------------|--------------------------------------------------------------------------------|-------|----------|------------|----|------|-------|
| LOC_Os06g43660.1 | inorganic H <sup>2</sup> B pyrophosphatase, putative, expressed                | Chr6  | 26272897 | 26278666 + | 8  | 3455 | -4.26 |
| LOC_Os06g43660.2 | inorganic H <sup>2</sup> B pyrophosphatase, putative, expressed                | Chr6  | 26272900 | 26278666 + | 9  | 3355 | -4.26 |
| LOC_Os08g29570.1 | pleiotropic drug resistance protein 3, putative, expressed                     | Chr8  | 18128534 | 18133057 - | 14 | 3149 | -4.26 |
| LOC_Os12g42850.1 | amino acid permease, putative, expressed                                       | Chr12 | 26621059 | 26626129 - | 14 | 3151 | -4.26 |
| LOC_Os12g42850.2 | amino acid permease, putative, expressed                                       | Chr12 | 26621059 | 26626129 - | 13 | 3217 | -4.25 |
| LOC_Os10g35200.1 | katanin p80 WD40 repeat-containing subunit B1 homolog 1, putative, expressed   | Chr10 | 18798725 | 18806059 - | 18 | 3689 | -4.25 |
| LOC_Os12g42850.3 | amino acid permease, putative, expressed                                       | Chr12 | 26621059 | 26626129 - | 13 | 3211 | -4.25 |
| LOC_Os09g23590.1 | expressed protein                                                              | Chr9  | 14020264 | 14020560 + | 1  | 329  | -4.23 |
| LOC_Os09g31360.1 | expressed protein                                                              | Chr9  | 18849755 | 18853448 + | 4  | 2395 | -4.21 |
| LOC_Os06g36560.1 | inositol oxygenase, putative, expressed                                        | Chr6  | 21478408 | 21482740 + | 11 | 2068 | -4.19 |
| LOC_Os05g39520.1 | methyltransferase, putative, expressed                                         | Chr5  | 23190629 | 23195162 - | 8  | 2894 | -4.19 |
| LOC_Os06g36560.2 | inositol oxygenase, putative, expressed                                        | Chr6  | 21478408 | 21482740 + | 10 | 2117 | -4.19 |
| LOC_Os11g08370.1 | transporter, major facilitator family, putative, expressed                     | Chr11 | 4413240  | 4415870 +  | 2  | 2160 | -4.19 |
| LOC_Os12g36100.1 | kinesin-4, putative, expressed                                                 | Chr12 | 22126680 | 22133896 + | 18 | 4597 | -4.17 |
| LOC_Os12g36100.2 | kinesin-4, putative, expressed                                                 | Chr12 | 22126680 | 22133896 + | 18 | 4576 | -4.17 |
| LOC_Os01g07390.1 | zinc finger, C3HC4 type family protein, expressed                              | Chr1  | 3501094  | 3504833 +  | 8  | 2242 | -4.16 |
| LOC_Os07g04690.1 | UDP-arabinose 4-epimerase 1, putative, expressed                               | Chr7  | 2080000  | 2083532 +  | 11 | 2385 | -4.14 |
| LOC_Os07g04690.2 | UDP-arabinose 4-epimerase 1, putative, expressed                               | Chr7  | 2080296  | 2083532 +  | 11 | 2169 | -4.14 |
| LOC_Os02g47570.2 | phosphatase, putative, expressed                                               | Chr2  | 29069440 | 29071177 + | 2  | 1004 | -4.13 |
| LOC_Os02g57420.1 | protein kinase APK1A, chloroplast precursor, putative, expressed               | Chr2  | 35190393 | 35194311 - | 5  | 2170 | -4.12 |
| LOC_Os02g29530.1 | glycosyl transferase 8 domain containing protein, putative, expressed          | Chr2  | 17559217 | 17562804 - | 3  | 2145 | -4.10 |
| LOC_Os03g64170.2 | GDSL-like lipase/acylhydrolase, putative, expressed                            | Chr3  | 36256015 | 36257319 - | 1  | 1337 | -4.09 |
| LOC_Os01g42410.1 | pleiotropic drug resistance protein, putative, expressed                       | Chr1  | 24107080 | 24115143 - | 21 | 5288 | -4.08 |
| LOC_Os03g02380.2 | major facilitator superfamily domain-containing protein 5, putative, expressed | Chr3  | 842386   | 846445 +   | 6  | 2522 | -4.07 |
| LOC_Os03g02380.1 | major facilitator superfamily domain-containing protein 5, putative, expressed | Chr3  | 842386   | 846445 +   | 8  | 2402 | -4.07 |
| LOC_Os02g51860.1 | dehydration response related protein, putative, expressed                      | Chr2  | 31763015 | 31768782 - | 8  | 3309 | -4.07 |
| LOC_Os05g28420.1 | transposon protein, putative, CACTA, En/Spm sub-class, expressed               | Chr5  | 16640582 | 16643617 + | 5  | 2700 | -4.06 |
| LOC_Os04g52504.1 | adhesive/proline-rich protein, putative, expressed                             | Chr4  | 31219819 | 31221018 - | 3  | 900  | -4.05 |
| LOC_Os09g21210.1 | beta-glucan-binding protein 4, putative, expressed                             | Chr9  | 12802546 | 12805261 - | 1  | 2748 | -4.05 |
| LOC_Os03g10620.2 | hydrolase, alpha/beta fold family domain containing protein, expressed         | Chr3  | 5422148  | 5423891 +  | 2  | 1717 | -4.04 |
| LOC_Os03g51650.1 | membrane protein, putative, expressed                                          | Chr3  | 29560540 | 29566023 - | 12 | 2591 | -4.00 |
| LOC_Os08g37670.1 | plastocyanin-like domain containing protein, putative, expressed               | Chr8  | 23858677 | 23860124 - | 2  | 1023 | -4.00 |
| LOC_Os02g09770.3 | abhydrolase domain-containing protein FAM108C1, putative, expressed            | Chr2  | 5038461  | 5043329 -  | 7  | 1863 | -3.99 |
| LOC_Os01g71100.1 | expressed protein                                                              | Chr1  | 41149955 | 41154678 - | 4  | 3703 | -3.99 |
| LOC_Os02g13370.1 | expressed protein                                                              | Chr2  | 7131235  | 7133480 -  | 2  | 1768 | -3.99 |
| LOC_Os09g27700.1 | microtubule associated protein, putative, expressed                            | Chr9  | 16855316 | 16861064 - | 12 | 3101 | -3.98 |
| LOC_Os02g09770.4 | abhydrolase domain-containing protein FAM108C1, putative, expressed            | Chr2  | 5038459  | 5043329 -  | 7  | 2018 | -3.97 |
| LOC_Os09g27700.2 | microtubule associated protein, putative, expressed                            | Chr9  | 16855328 | 16861064 - | 11 | 3207 | -3.96 |
| LOC_Os03g01150.1 | palmitoyl-protein thioesterase 1 precursor, putative, expressed                | Chr3  | 106514   | 110545 +   | 12 | 1675 | -3.95 |
| LOC_Os03g01150.2 | palmitoyl-protein thioesterase 1 precursor, putative, expressed                | Chr3  | 106528   | 110545 +   | 12 | 1637 | -3.95 |
| LOC_Os01g08340.1 | zinc finger family protein, putative, expressed                                | Chr1  | 4091068  | 4094859 +  | 6  | 2348 | -3.93 |
| LOC_Os12g17090.1 | stripe rust resistance protein Yr10, putative, expressed                       | Chr12 | 9781957  | 9786758 -  | 4  | 4186 | -3.92 |
| LOC_Os12g17090.2 | stripe rust resistance protein Yr10, putative, expressed                       | Chr12 | 9781957  | 9786750 -  | 3  | 4264 | -3.92 |
| LOC_Os03g42464.1 | expressed protein                                                              | Chr3  | 23623464 | 23630649 - | 6  | 4565 | -3.91 |
| LOC_Os03g37010.2 | glycosyltransferase, putative, expressed                                       | Chr3  | 20515439 | 20518534 - | 6  | 2306 | -3.89 |

|                  |                                                                                                    |       |          |            |    |      |       |
|------------------|----------------------------------------------------------------------------------------------------|-------|----------|------------|----|------|-------|
| LOC_Os03g37010.3 | glycosyltransferase, putative, expressed                                                           | Chr3  | 20515439 | 20518534 - | 5  | 2439 | -3.89 |
| LOC_Os02g04180.1 | transposon protein, putative, CACTA, En/Spm sub-class, expressed                                   | Chr2  | 1826715  | 1829346 -  | 3  | 1383 | -3.88 |
| LOC_Os05g25640.1 | cytochrome P450, putative, expressed                                                               | Chr5  | 14899987 | 14904546 - | 3  | 1935 | -3.88 |
| LOC_Os03g37010.1 | glycosyltransferase, putative, expressed                                                           | Chr3  | 20515439 | 20519238 - | 6  | 3016 | -3.88 |
| LOC_Os10g25760.1 | transposon protein, putative, CACTA, En/Spm sub-class, expressed                                   | Chr10 | 13345429 | 13348529 - | 3  | 3078 | -3.87 |
| LOC_Os06g51290.4 | phytoene synthase, chloroplast precursor, putative, expressed                                      | Chr6  | 31051971 | 31055926 - | 6  | 2222 | -3.87 |
| LOC_Os02g38780.2 | protein phosphatase 2C containing protein, expressed                                               | Chr2  | 23432540 | 23442713 + | 18 | 3954 | -3.86 |
| LOC_Os01g40094.1 | protein phosphatase 2C, putative, expressed                                                        | Chr1  | 22617780 | 22624147 + | 4  | 2162 | -3.86 |
| LOC_Os11g37520.1 | BTBT3 - Bric-a-Brac, Tramtrack, Broad Complex BTB domain with tetratricopeptide repeats, expressed | Chr11 | 22150225 | 22155604 + | 5  | 3872 | -3.85 |
| LOC_Os11g05480.1 | transcription factor, putative, expressed                                                          | Chr11 | 2462254  | 2468733 -  | 13 | 2650 | -3.84 |
| LOC_Os03g64170.1 | GDSL-like lipase/acylhydrolase, putative, expressed                                                | Chr3  | 36256015 | 36259499 - | 2  | 1761 | -3.83 |
| LOC_Os02g09770.1 | abhydrolase domain-containing protein FAM108C1, putative, expressed                                | Chr2  | 5038904  | 5043329 -  | 6  | 1805 | -3.82 |
| LOC_Os01g48370.1 | OsFBT1 - F-box and tubby domain containing protein, expressed                                      | Chr1  | 27716188 | 27721217 - | 4  | 1651 | -3.82 |
| LOC_Os03g08070.3 | copper-transporting ATPase PAA1, putative, expressed                                               | Chr3  | 4119945  | 4127084 -  | 17 | 3833 | -3.81 |
| LOC_Os03g08070.1 | copper-transporting ATPase PAA1, putative, expressed                                               | Chr3  | 4119945  | 4126933 -  | 16 | 3592 | -3.81 |
| LOC_Os03g08070.2 | copper-transporting ATPase PAA1, putative, expressed                                               | Chr3  | 4119945  | 4126933 -  | 15 | 3644 | -3.80 |
| LOC_Os03g14800.5 | serine palmitoyltransferase 1, putative, expressed                                                 | Chr3  | 8048239  | 8052567 -  | 11 | 1895 | -3.80 |
| LOC_Os03g14800.6 | serine palmitoyltransferase 1, putative, expressed                                                 | Chr3  | 8048239  | 8052567 -  | 11 | 1939 | -3.80 |
| LOC_Os01g69920.2 | histidine kinase, putative, expressed                                                              | Chr1  | 40403715 | 40409615 - | 10 | 4473 | -3.80 |
| LOC_Os01g69920.3 | histidine kinase, putative, expressed                                                              | Chr1  | 40403715 | 40409615 - | 10 | 4504 | -3.80 |
| LOC_Os01g69920.1 | histidine kinase, putative, expressed                                                              | Chr1  | 40403715 | 40409615 - | 11 | 4434 | -3.80 |
| LOC_Os02g09770.2 | abhydrolase domain-containing protein FAM108C1, putative, expressed                                | Chr2  | 5038904  | 5043329 -  | 6  | 1761 | -3.78 |
| LOC_Os03g08390.1 | expressed protein                                                                                  | Chr3  | 4287335  | 4291864 +  | 5  | 2422 | -3.78 |
| LOC_Os07g48420.1 | expressed protein                                                                                  | Chr7  | 28956984 | 28960828 - | 6  | 1827 | -3.77 |
| LOC_Os04g32940.1 | Leucine Rich Repeat family protein, expressed                                                      | Chr4  | 19899895 | 19903657 - | 1  | 3795 | -3.76 |
| LOC_Os08g10580.1 | expressed protein                                                                                  | Chr8  | 6226272  | 6231302 +  | 7  | 2205 | -3.76 |
| LOC_Os07g48420.3 | expressed protein                                                                                  | Chr7  | 28956984 | 28960828 - | 5  | 1940 | -3.75 |
| LOC_Os11g47809.1 | metallothionein, putative, expressed                                                               | Chr11 | 28827676 | 28828513 + | 2  | 761  | -3.74 |
| LOC_Os10g30080.1 | xylosyltransferase, putative, expressed                                                            | Chr10 | 15621355 | 15624800 + | 4  | 1984 | -3.73 |
| LOC_Os01g31629.3 | expressed protein                                                                                  | Chr1  | 17309304 | 17325760 - | 7  | 1318 | -3.72 |
| LOC_Os01g31629.2 | expressed protein                                                                                  | Chr1  | 17309304 | 17325760 - | 7  | 1313 | -3.72 |
| LOC_Os10g30080.2 | xylosyltransferase, putative, expressed                                                            | Chr10 | 15621355 | 15624800 + | 4  | 1992 | -3.72 |
| LOC_Os05g11080.1 | transposon protein, putative, CACTA, En/Spm sub-class, expressed                                   | Chr5  | 6221937  | 6230511 -  | 10 | 4630 | -3.72 |
| LOC_Os02g30210.1 | OsFBK7 - F-box domain and kelch repeat containing protein, expressed                               | Chr2  | 17958496 | 17961723 - | 4  | 2278 | -3.72 |
| LOC_Os02g30210.2 | OsFBK7 - F-box domain and kelch repeat containing protein, expressed                               | Chr2  | 17958496 | 17960970 - | 4  | 2174 | -3.70 |
| LOC_Os03g14990.1 | chorismate synthase 2, chloroplast precursor, putative, expressed                                  | Chr3  | 8177749  | 8181743 -  | 13 | 2048 | -3.70 |
| LOC_Os02g15700.1 | expressed protein                                                                                  | Chr2  | 8842927  | 8844249 -  | 1  | 1355 | -3.69 |
| LOC_Os01g31629.1 | expressed protein                                                                                  | Chr1  | 17309298 | 17325760 - | 6  | 1378 | -3.68 |
| LOC_Os06g13210.2 | peptide transporter PTR2, putative, expressed                                                      | Chr6  | 7247729  | 7251058 +  | 3  | 2148 | -3.68 |
| LOC_Os10g14920.2 | integral membrane protein DUF6 containing protein, expressed                                       | Chr10 | 7810631  | 7817138 -  | 8  | 1998 | -3.68 |
| LOC_Os01g67960.1 | GPI transamidase component PIG-S-related, putative, expressed                                      | Chr1  | 39486932 | 39492099 + | 13 | 2774 | -3.66 |
| LOC_Os10g14920.7 | integral membrane protein DUF6 containing protein, expressed                                       | Chr10 | 7813323  | 7817135 -  | 6  | 2286 | -3.65 |
| LOC_Os10g14920.3 | integral membrane protein DUF6 containing protein, expressed                                       | Chr10 | 7813323  | 7817132 -  | 5  | 2331 | -3.65 |
| LOC_Os01g23640.1 | mov34/MPN/PAD-1 family protein, expressed                                                          | Chr1  | 13296332 | 13305295 + | 14 | 2458 | -3.63 |
| LOC_Os09g24900.1 | methyltransferase, putative, expressed                                                             | Chr9  | 14867362 | 14870927 + | 7  | 2702 | -3.63 |

|                   |                                                                           |       |          |          |   |    |      |       |
|-------------------|---------------------------------------------------------------------------|-------|----------|----------|---|----|------|-------|
| LOC_Os10g39540.1  | protein phosphatase 2C, putative, expressed                               | Chr10 | 21126202 | 21129813 | + | 4  | 1118 | -3.62 |
| LOC_Os05g02500.3  | dual specificity protein phosphatase, putative, expressed                 | Chr5  | 858294   | 862243   | - | 3  | 2611 | -3.60 |
| LOC_Os10g14920.1  | integral membrane protein DUF6 containing protein, expressed              | Chr10 | 7810631  | 7817138  | - | 8  | 3205 | -3.60 |
| LOC_Os10g14920.5  | integral membrane protein DUF6 containing protein, expressed              | Chr10 | 7810690  | 7817132  | - | 7  | 3188 | -3.60 |
| LOC_Os12g38760.1  | nucleotide pyrophosphatase/phosphodiesterase, putative, expressed         | Chr12 | 23810525 | 23814363 | - | 13 | 2527 | -3.60 |
| LOC_Os12g38760.2  | nucleotide pyrophosphatase/phosphodiesterase, putative, expressed         | Chr12 | 23810525 | 23814363 | - | 12 | 2608 | -3.60 |
| LOC_Os05g02500.1  | dual specificity protein phosphatase, putative, expressed                 | Chr5  | 858294   | 862759   | - | 3  | 3125 | -3.60 |
| LOC_Os05g02500.2  | dual specificity protein phosphatase, putative, expressed                 | Chr5  | 858294   | 862243   | - | 3  | 2607 | -3.57 |
| LOC_Os09g24900.2  | methyltransferase, putative, expressed                                    | Chr9  | 14867406 | 14870927 | + | 7  | 2826 | -3.56 |
| LOC_Os04g51950.1  | serine/threonine-protein kinase HT1, putative, expressed                  | Chr4  | 30825556 | 30829581 | - | 3  | 2162 | -3.55 |
| LOC_Os10g39540.3  | protein phosphatase 2C, putative, expressed                               | Chr10 | 21126328 | 21129813 | + | 4  | 1902 | -3.54 |
| LOC_Os03g55180.1  | DUF1336 domain containing protein, expressed                              | Chr3  | 31399258 | 31402343 | - | 10 | 2459 | -3.54 |
| LOC_Os07g48420.2  | expressed protein                                                         | Chr7  | 28956982 | 28960828 | - | 5  | 3105 | -3.54 |
| LOC_Os04g45070.1  | remorin, putative, expressed                                              | Chr4  | 26664682 | 26668433 | - | 5  | 1444 | -3.53 |
| LOC_Os01g70190.1  | exostosin family domain containing protein, expressed                     | Chr1  | 40626011 | 40629506 | - | 4  | 2328 | -3.52 |
| LOC_Os09g39200.1  | expressed protein                                                         | Chr9  | 22513506 | 22517201 | - | 5  | 2340 | -3.52 |
| LOC_Os08g34640.1  | receptor-like protein kinase precursor, putative, expressed               | Chr8  | 21756526 | 21762152 | - | 3  | 3904 | -3.52 |
| LOC_Os03g21720.1  | vacuolar-sorting receptor precursor, putative, expressed                  | Chr3  | 12401938 | 12408473 | + | 12 | 2959 | -3.51 |
| LOC_Os04g57560.1  | amine oxidase, flavin-containing, domain containing protein, expressed    | Chr4  | 34244247 | 34248323 | - | 10 | 2458 | -3.51 |
| LOC_Os03g44944.1  | CCR4-NOT transcription factor, putative, expressed                        | Chr3  | 25376064 | 25376720 | - | 3  | 552  | -3.51 |
| LOC_Os06g29804.2  | expressed protein                                                         | Chr6  | 17156034 | 17159871 | + | 3  | 1048 | -3.50 |
| LOC_Os05g33360.1  | transmembrane BAX inhibitor motif-containing protein, putative, expressed | Chr5  | 19588390 | 19590780 | - | 4  | 1327 | -3.50 |
| LOC_Os07g48130.3  | potassium transporter, putative, expressed                                | Chr7  | 28741520 | 28747059 | - | 10 | 3241 | -3.50 |
| LOC_Os07g48130.2  | potassium transporter, putative, expressed                                | Chr7  | 28741520 | 28745682 | - | 9  | 3210 | -3.50 |
| LOC_Os04g31340.1  | CBS domain containing membrane protein, putative, expressed               | Chr4  | 18746901 | 18752060 | - | 6  | 1920 | -3.49 |
| LOC_Os02g06920.1  | zinc finger, C3HC4 type, domain containing protein, expressed             | Chr2  | 3495208  | 3500149  | - | 9  | 2336 | -3.49 |
| LOC_Os02g06920.2  | zinc finger, C3HC4 type, domain containing protein, expressed             | Chr2  | 3495208  | 3500149  | - | 9  | 2352 | -3.49 |
| LOC_Os07g48130.1  | potassium transporter, putative, expressed                                | Chr7  | 28741518 | 28746109 | - | 10 | 3574 | -3.48 |
| LOC_Os07g48130.4  | potassium transporter, putative, expressed                                | Chr7  | 28741520 | 28746109 | - | 10 | 3602 | -3.47 |
| LOC_Os03g14370.2  | ACT domain containing protein, expressed                                  | Chr3  | 7815021  | 7817753  | + | 4  | 2062 | -3.47 |
| LOC_Os03g14370.1  | ACT domain containing protein, expressed                                  | Chr3  | 7815021  | 7817753  | + | 3  | 2247 | -3.47 |
| LOC_Os05g44170.1  | cyclic phosphodiesterase, putative, expressed                             | Chr5  | 25666144 | 25667391 | + | 3  | 1052 | -3.46 |
| LOC_Os04g51400.3  | zinc finger, C3HC4 type domain containing protein, expressed              | Chr4  | 30439467 | 30441472 | - | 4  | 1738 | -3.45 |
| LOC_Os04g51400.2  | zinc finger, C3HC4 type domain containing protein, expressed              | Chr4  | 30439467 | 30442796 | - | 5  | 1648 | -3.44 |
| LOC_Os04g51400.1  | zinc finger, C3HC4 type domain containing protein, expressed              | Chr4  | 30439467 | 30442859 | - | 5  | 1701 | -3.43 |
| LOC_Os04g51400.5  | zinc finger, C3HC4 type domain containing protein, expressed              | Chr4  | 30439474 | 30442859 | - | 4  | 1810 | -3.43 |
| LOC_Os05g09480.1  | OslAA16 - Auxin-responsive Aux/IAA gene family member, expressed          | Chr5  | 5329581  | 5331490  | + | 6  | 1591 | -3.43 |
| LOC_Os01g16080.1  | expressed protein                                                         | Chr1  | 9057835  | 9061059  | - | 4  | 1373 | -3.42 |
| LOC_Os09g20980.1  | RING-H2 finger protein, putative, expressed                               | Chr9  | 12637640 | 12639373 | + | 1  | 1766 | -3.41 |
| LOC_Os12g36730.1  | stripe rust resistance protein Yr10, putative, expressed                  | Chr12 | 22497534 | 22502497 | - | 8  | 3155 | -3.41 |
| LOC_Os01g18670.1  | MDR-like ABC transporter, putative, expressed                             | Chr1  | 10515723 | 10521282 | - | 11 | 4210 | -3.40 |
| LOC_Os05g40270.12 | expressed protein                                                         | Chr5  | 23660810 | 23662906 | + | 3  | 1847 | -3.39 |
| LOC_Os03g07180.1  | embryonic protein DC-8, putative, expressed                               | Chr3  | 3677754  | 3679971  | - | 2  | 2143 | -3.39 |
| LOC_Os03g07180.3  | embryonic protein DC-8, putative, expressed                               | Chr3  | 3677754  | 3679971  | - | 3  | 2034 | -3.39 |
| LOC_Os03g07180.2  | embryonic protein DC-8, putative, expressed                               | Chr3  | 3677867  | 3679971  | - | 3  | 2002 | -3.39 |

|                  |                                                                                           |       |          |          |   |    |      |       |
|------------------|-------------------------------------------------------------------------------------------|-------|----------|----------|---|----|------|-------|
| LOC_Os03g05630.1 | expressed protein                                                                         | Chr3  | 2811738  | 2814268  | + | 3  | 1447 | -3.36 |
| LOC_Os06g23684.1 | tyrosine aminotransferase, putative, expressed                                            | Chr6  | 13835598 | 13844081 | + | 7  | 1932 | -3.33 |
| LOC_Os06g51480.1 | expressed protein                                                                         | Chr6  | 31181596 | 31184726 | + | 6  | 1836 | -3.33 |
| LOC_Os02g45810.1 | WD domain, G-beta repeat domain containing protein, expressed                             | Chr2  | 27906289 | 27909389 | - | 2  | 1957 | -3.32 |
| LOC_Os06g51480.2 | expressed protein                                                                         | Chr6  | 31181664 | 31184726 | + | 5  | 1857 | -3.31 |
| LOC_Os04g45970.1 | glutamate dehydrogenase protein, putative, expressed                                      | Chr4  | 27233361 | 27238105 | + | 9  | 2390 | -3.30 |
| LOC_Os02g08364.1 | protein phosphatase 2C, putative, expressed                                               | Chr2  | 4449777  | 4454808  | + | 13 | 3006 | -3.30 |
| LOC_Os01g51010.2 | DUF292 domain containing protein, expressed                                               | Chr1  | 29309116 | 29312618 | + | 3  | 3444 | -3.27 |
| LOC_Os10g39540.4 | protein phosphatase 2C, putative, expressed                                               | Chr10 | 21126328 | 21130094 | + | 5  | 1755 | -3.26 |
| LOC_Os02g45810.2 | WD domain, G-beta repeat domain containing protein, expressed                             | Chr2  | 27906289 | 27909389 | - | 3  | 2071 | -3.26 |
| LOC_Os07g47350.1 | potassium transporter, putative, expressed                                                | Chr7  | 28312108 | 28316774 | - | 8  | 3059 | -3.25 |
| LOC_Os10g33730.2 | pentatricopeptide, putative, expressed                                                    | Chr10 | 17797819 | 17803223 | - | 4  | 3562 | -3.24 |
| LOC_Os01g51010.1 | DUF292 domain containing protein, expressed                                               | Chr1  | 29306448 | 29312618 | + | 7  | 4193 | -3.23 |
| LOC_Os10g36690.4 | dehydration response related protein, putative, expressed                                 | Chr10 | 19620006 | 19626243 | + | 6  | 2775 | -3.23 |
| LOC_Os03g11300.1 | expressed protein                                                                         | Chr3  | 5814166  | 5816687  | - | 6  | 1592 | -3.23 |
| LOC_Os10g36690.2 | dehydration response related protein, putative, expressed                                 | Chr10 | 19621599 | 19626243 | + | 6  | 2982 | -3.23 |
| LOC_Os10g36690.1 | dehydration response related protein, putative, expressed                                 | Chr10 | 19621599 | 19626243 | + | 6  | 2985 | -3.23 |
| LOC_Os08g35860.1 | cytokinin dehydrogenase precursor, putative, expressed                                    | Chr8  | 22616784 | 22619732 | - | 5  | 2165 | -3.22 |
| LOC_Os10g39540.2 | protein phosphatase 2C, putative, expressed                                               | Chr10 | 21126318 | 21130094 | + | 5  | 2596 | -3.21 |
| LOC_Os01g07310.4 | transporter-related, putative, expressed                                                  | Chr1  | 3446936  | 3450222  | - | 7  | 1642 | -3.21 |
| LOC_Os08g34300.1 | retrotransposon protein, putative, unclassified, expressed                                | Chr8  | 21526881 | 21531782 | + | 4  | 4468 | -3.20 |
| LOC_Os10g29620.1 | tyrosine protein kinase domain containing protein, putative, expressed                    | Chr10 | 15402600 | 15405854 | - | 5  | 1789 | -3.20 |
| LOC_Os05g49770.1 | CTP synthase, putative, expressed                                                         | Chr5  | 28551310 | 28557309 | - | 21 | 3150 | -3.19 |
| LOC_Os05g49770.2 | CTP synthase, putative, expressed                                                         | Chr5  | 28551310 | 28557309 | - | 21 | 3138 | -3.19 |
| LOC_Os10g36690.3 | dehydration response related protein, putative, expressed                                 | Chr10 | 19622252 | 19626243 | + | 6  | 2772 | -3.18 |
| LOC_Os10g37560.1 | expressed protein                                                                         | Chr10 | 20104427 | 20106957 | - | 8  | 1806 | -3.17 |
| LOC_Os05g48600.1 | glycosyltransferase family 43 protein, putative, expressed                                | Chr5  | 27860575 | 27865055 | + | 5  | 2304 | -3.17 |
| LOC_Os10g22980.3 | leucine rich repeat domain containing protein, putative, expressed                        | Chr10 | 11980934 | 11986090 | + | 5  | 2870 | -3.17 |
| LOC_Os10g22980.1 | leucine rich repeat domain containing protein, putative, expressed                        | Chr10 | 11981006 | 11986117 | + | 6  | 2778 | -3.17 |
| LOC_Os10g22980.2 | leucine rich repeat domain containing protein, putative, expressed                        | Chr10 | 11982142 | 11986090 | + | 5  | 2764 | -3.17 |
| LOC_Os10g22980.4 | leucine rich repeat domain containing protein, putative, expressed                        | Chr10 | 11982185 | 11986090 | + | 4  | 2762 | -3.17 |
| LOC_Os05g48600.2 | glycosyltransferase family 43 protein, putative, expressed                                | Chr5  | 27860628 | 27865038 | + | 6  | 2149 | -3.17 |
| LOC_Os01g53000.2 | trehalose synthase, putative, expressed                                                   | Chr1  | 30460007 | 30463589 | + | 2  | 2777 | -3.16 |
| LOC_Os03g07360.1 | expressed protein                                                                         | Chr3  | 3738779  | 3741715  | + | 2  | 2056 | -3.15 |
| LOC_Os01g07310.1 | transporter-related, putative, expressed                                                  | Chr1  | 3446936  | 3450222  | - | 8  | 1994 | -3.14 |
| LOC_Os01g43630.1 | adaptin, putative, expressed                                                              | Chr1  | 24994804 | 25002855 | + | 13 | 3104 | -3.14 |
| LOC_Os01g43630.2 | adaptin, putative, expressed                                                              | Chr1  | 24994804 | 25002855 | + | 13 | 3101 | -3.14 |
| LOC_Os08g10290.1 | SHR5-receptor-like kinase, putative, expressed                                            | Chr8  | 5980928  | 5988963  | + | 24 | 3959 | -3.13 |
| LOC_Os01g07310.3 | transporter-related, putative, expressed                                                  | Chr1  | 3446936  | 3450222  | - | 7  | 2216 | -3.13 |
| LOC_Os02g09359.1 | BRASSINOSTEROID INSENSITIVE 1-associated receptor kinase 1 precursor, putative, expressed | Chr2  | 4808234  | 4817119  | - | 4  | 1791 | -3.13 |
| LOC_Os02g39970.1 | regulatory subunit, putative, expressed                                                   | Chr2  | 24166829 | 24174245 | - | 16 | 2996 | -3.13 |
| LOC_Os02g39970.2 | regulatory subunit, putative, expressed                                                   | Chr2  | 24166829 | 24174245 | - | 16 | 3177 | -3.12 |
| LOC_Os05g25840.3 | ELMO/CED-12 family protein, putative, expressed                                           | Chr5  | 15040797 | 15044759 | + | 7  | 2732 | -3.10 |
| LOC_Os01g07310.2 | transporter-related, putative, expressed                                                  | Chr1  | 3446937  | 3450222  | - | 7  | 2204 | -3.09 |
| LOC_Os05g25840.1 | ELMO/CED-12 family protein, putative, expressed                                           | Chr5  | 15040797 | 15044759 | + | 6  | 2790 | -3.09 |

|                  |                                                                               |       |          |            |    |      |       |
|------------------|-------------------------------------------------------------------------------|-------|----------|------------|----|------|-------|
| LOC_Os12g03470.4 | alpha-N-arabinofuranosidase A, putative, expressed                            | Chr12 | 1359586  | 1366649 +  | 19 | 3304 | -3.08 |
| LOC_Os12g03470.2 | alpha-N-arabinofuranosidase A, putative, expressed                            | Chr12 | 1359586  | 1366649 +  | 18 | 3372 | -3.08 |
| LOC_Os12g03470.5 | alpha-N-arabinofuranosidase A, putative, expressed                            | Chr12 | 1359586  | 1366649 +  | 17 | 3479 | -3.07 |
| LOC_Os08g31980.1 | trehalose-6-phosphate synthase, putative, expressed                           | Chr8  | 19830328 | 19836087 - | 4  | 3417 | -3.05 |
| LOC_Os10g33720.1 | methyltransferase, putative, expressed                                        | Chr10 | 17794333 | 17799831 + | 8  | 2836 | -3.05 |
| LOC_Os10g33720.3 | methyltransferase, putative, expressed                                        | Chr10 | 17795194 | 17799831 + | 8  | 2789 | -3.05 |
| LOC_Os03g14800.3 | serine palmitoyltransferase 1, putative, expressed                            | Chr3  | 8046961  | 8052547 -  | 16 | 2589 | -3.05 |
| LOC_Os03g32590.2 | transcription initiation factor, putative, expressed                          | Chr3  | 18639911 | 18647607 - | 12 | 2719 | -3.05 |
| LOC_Os06g24704.1 | acyl-coenzyme A oxidase, putative, expressed                                  | Chr6  | 14504077 | 14512950 - | 13 | 2861 | -3.04 |
| LOC_Os03g14800.1 | serine palmitoyltransferase 1, putative, expressed                            | Chr3  | 8046989  | 8052547 -  | 14 | 2695 | -3.01 |
| LOC_Os07g37180.2 | ABC1 family domain containing protein, putative, expressed                    | Chr7  | 22269039 | 22273616 - | 5  | 2574 | -3.00 |
| LOC_Os02g54080.1 | expressed protein                                                             | Chr2  | 33124415 | 33127635 - | 6  | 1642 | -3.00 |
| LOC_Os02g54080.2 | expressed protein                                                             | Chr2  | 33124415 | 33127635 - | 6  | 1639 | -3.00 |
| LOC_Os02g39970.3 | regulatory subunit, putative, expressed                                       | Chr2  | 24168406 | 24174245 - | 12 | 2979 | -2.99 |
| LOC_Os09g36300.1 | OsLonP4 - Putative Lon protease homologue, expressed                          | Chr9  | 20945915 | 20952936 - | 17 | 3861 | -2.99 |
| LOC_Os09g36300.3 | OsLonP4 - Putative Lon protease homologue, expressed                          | Chr9  | 20945915 | 20952936 - | 16 | 3942 | -2.99 |
| LOC_Os09g36300.4 | OsLonP4 - Putative Lon protease homologue, expressed                          | Chr9  | 20945915 | 20951982 - | 16 | 3582 | -2.99 |
| LOC_Os09g36300.2 | OsLonP4 - Putative Lon protease homologue, expressed                          | Chr9  | 20945915 | 20952936 - | 16 | 3945 | -2.99 |
| LOC_Os03g09220.6 | stage II sporulation protein E, putative, expressed                           | Chr3  | 4815464  | 4820417 +  | 10 | 2121 | -2.98 |
| LOC_Os03g09220.4 | stage II sporulation protein E, putative, expressed                           | Chr3  | 4815464  | 4820417 +  | 10 | 2127 | -2.98 |
| LOC_Os04g02070.1 | expressed protein                                                             | Chr4  | 661144   | 667572 -   | 2  | 3072 | -2.95 |
| LOC_Os11g11810.1 | NBS-LRR disease resistance protein, putative, expressed                       | Chr11 | 6554514  | 6561687 +  | 3  | 4340 | -2.93 |
| LOC_Os05g45310.1 | ER lumen protein retaining receptor, putative, expressed                      | Chr5  | 26288908 | 26291990 - | 6  | 1470 | -2.92 |
| LOC_Os12g03470.3 | alpha-N-arabinofuranosidase A, putative, expressed                            | Chr12 | 1359572  | 1366649 +  | 18 | 3208 | -2.91 |
| LOC_Os12g03470.1 | alpha-N-arabinofuranosidase A, putative, expressed                            | Chr12 | 1360144  | 1366649 +  | 17 | 3194 | -2.89 |
| LOC_Os06g04070.1 | pyridoxal-dependent decarboxylase protein, putative, expressed                | Chr6  | 1674045  | 1677406 -  | 1  | 3394 | -2.83 |
| LOC_Os09g34310.1 | expressed protein                                                             | Chr9  | 20252312 | 20253027 + | 2  | 670  | -2.83 |
| LOC_Os01g56890.2 | expressed protein                                                             | Chr1  | 32855275 | 32858101 - | 3  | 1889 | -2.81 |
| LOC_Os05g48620.1 | tRNA-binding arm, putative, expressed                                         | Chr5  | 27868472 | 27877538 - | 19 | 4563 | -2.77 |
| LOC_Os03g20180.2 | ECT protein, putative, expressed                                              | Chr3  | 11402649 | 11408106 + | 8  | 3233 | -2.74 |
| LOC_Os01g62820.2 | Transcription initiation factor TFIID subunit A containing protein, expressed | Chr1  | 36385625 | 36390411 - | 8  | 2432 | -2.74 |
| LOC_Os01g62820.3 | Transcription initiation factor TFIID subunit A containing protein, expressed | Chr1  | 36385625 | 36390411 - | 8  | 2427 | -2.74 |
| LOC_Os09g28220.1 | NFKB, putative, expressed                                                     | Chr9  | 17141366 | 17143325 + | 1  | 1992 | -2.74 |
| LOC_Os01g62820.1 | Transcription initiation factor TFIID subunit A containing protein, expressed | Chr1  | 36385625 | 36390411 - | 8  | 2435 | -2.74 |
| LOC_Os03g20180.1 | ECT protein, putative, expressed                                              | Chr3  | 11402649 | 11408108 + | 7  | 4214 | -2.72 |
| LOC_Os01g28680.8 | WD domain, G-beta repeat domain containing protein, expressed                 | Chr1  | 16046682 | 16056268 + | 10 | 4388 | -2.69 |
| LOC_Os03g25140.1 | peptidyl-prolyl isomerase PASTICCINO1, putative, expressed                    | Chr3  | 14359330 | 14370739 + | 20 | 3025 | -2.65 |
| LOC_Os01g28680.9 | WD domain, G-beta repeat domain containing protein, expressed                 | Chr1  | 16046692 | 16056268 + | 11 | 4273 | -2.65 |
| LOC_Os10g31460.4 | retrotransposon protein, putative, unclassified, expressed                    | Chr10 | 16486322 | 16487160 - | 1  | 871  | -2.62 |
| LOC_Os10g31460.5 | retrotransposon protein, putative, unclassified, expressed                    | Chr10 | 16486322 | 16487160 - | 2  | 770  | -2.62 |
| LOC_Os05g06280.3 | ATKINESIN-13A/KINESIN-13A, putative, expressed                                | Chr5  | 3207517  | 3210197 +  | 5  | 2078 | -2.59 |
| LOC_Os05g41460.2 | cysteine proteinase inhibitor precursor protein, putative, expressed          | Chr5  | 24279602 | 24281856 - | 3  | 1804 | -2.58 |
| LOC_Os05g41460.1 | cysteine proteinase inhibitor precursor protein, putative, expressed          | Chr5  | 24279602 | 24281856 - | 3  | 1794 | -2.58 |
| LOC_Os04g48790.1 | rhoGAP domain containing protein, expressed                                   | Chr4  | 29106041 | 29109606 + | 5  | 1963 | -2.58 |
| LOC_Os07g19530.1 | peptidase, putative, expressed                                                | Chr7  | 11551089 | 11570302 - | 21 | 3678 | -2.57 |

|                  |                                                                        |       |          |            |    |      |       |
|------------------|------------------------------------------------------------------------|-------|----------|------------|----|------|-------|
| LOC_Os12g43950.3 | homeobox domain containing protein, expressed                          | Chr12 | 27271529 | 27276782 - | 6  | 3551 | -2.54 |
| LOC_Os06g43640.2 | Ser/Thr protein phosphatase family protein, putative, expressed        | Chr6  | 26254119 | 26259281 - | 10 | 2579 | -2.51 |
| LOC_Os06g43640.1 | Ser/Thr protein phosphatase family protein, putative, expressed        | Chr6  | 26254119 | 26259255 - | 10 | 2221 | -2.51 |
| LOC_Os06g12390.1 | galactosyltransferase family protein, putative, expressed              | Chr6  | 6715886  | 6722017 +  | 8  | 3807 | -2.49 |
| LOC_Os05g06280.2 | ATKINESIN-13A/KINESIN-13A, putative, expressed                         | Chr5  | 3203042  | 3212349 +  | 17 | 4143 | -2.49 |
| LOC_Os06g12390.2 | galactosyltransferase family protein, putative, expressed              | Chr6  | 6715886  | 6722017 +  | 9  | 3977 | -2.49 |
| LOC_Os12g43950.2 | homeobox domain containing protein, expressed                          | Chr12 | 27271529 | 27276756 - | 6  | 2894 | -2.45 |
| LOC_Os12g43950.4 | homeobox domain containing protein, expressed                          | Chr12 | 27271529 | 27276782 - | 5  | 3286 | -2.45 |
| LOC_Os12g43950.1 | homeobox domain containing protein, expressed                          | Chr12 | 27271529 | 27276782 - | 6  | 3399 | -2.43 |
| LOC_Os03g17540.1 | TBC domain containing protein, expressed                               | Chr3  | 9743501  | 9751248 +  | 19 | 4141 | -2.35 |
| LOC_Os03g17540.3 | TBC domain containing protein, expressed                               | Chr3  | 9743501  | 9751248 +  | 16 | 5017 | -2.34 |
| LOC_Os04g31320.1 | SWIB/MDM2 domain containing protein, expressed                         | Chr4  | 18735459 | 18738055 + | 3  | 1928 | -2.32 |
| LOC_Os09g34310.2 | expressed protein                                                      | Chr9  | 20252280 | 20254552 + | 3  | 693  | -2.31 |
| LOC_Os05g06280.1 | ATKINESIN-13A/KINESIN-13A, putative, expressed                         | Chr5  | 3203330  | 3214116 +  | 19 | 4192 | -2.31 |
| LOC_Os11g48060.1 | laccase-22 precursor, putative, expressed                              | Chr11 | 28973120 | 28976343 + | 6  | 2688 | -2.29 |
| LOC_Os01g15640.1 | no apical meristem protein, putative, expressed                        | Chr1  | 8792646  | 8797363 -  | 5  | 2165 | -2.28 |
| LOC_Os04g51690.1 | glycosyl hydrolase family 47 domain contain protein, expressed         | Chr4  | 30621160 | 30628372 - | 14 | 2749 | -2.23 |
| LOC_Os07g01550.1 | leucine rich repeat domain containing protein, putative, expressed     | Chr7  | 343926   | 350103 +   | 5  | 4170 | -2.22 |
| LOC_Os03g06090.1 | high-affinity nickel-transport family protein, putative, expressed     | Chr3  | 3048590  | 3051800 -  | 2  | 1443 | -2.19 |
| LOC_Os10g40640.1 | glycosyl transferase 8 domain containing protein, putative, expressed  | Chr10 | 21798920 | 21802986 + | 5  | 2534 | -2.18 |
| LOC_Os04g58140.1 | elongation factor Tu, putative, expressed                              | Chr4  | 34626345 | 34631340 - | 12 | 2875 | -2.16 |
| LOC_Os04g58140.2 | elongation factor Tu, putative, expressed                              | Chr4  | 34626374 | 34631340 - | 11 | 3374 | -2.13 |
| LOC_Os12g02260.2 | nucleotidyltransferase, putative, expressed                            | Chr12 | 707530   | 713432 -   | 8  | 3776 | -2.02 |
| LOC_Os09g00999.1 | expressed protein                                                      | Chr9  | 2874     | 5458 +     | 1  | 2617 | -1.02 |
| LOC_Os09g01000.1 | expressed protein                                                      | Chr9  | 6384     | 9310 +     | 1  | 2959 | -0.94 |
| LOC_Os05g19560.1 | retrotransposon protein, putative, Ty3-gypsy subclass, expressed       | Chr5  | 11381974 | 11389746 - | 4  | 5960 | 2.18  |
| LOC_Os03g05550.1 | expressed protein                                                      | Chr3  | 2763464  | 2764156 -  | 2  | 295  | 2.20  |
| LOC_Os08g25290.1 | expressed protein                                                      | Chr8  | 15359346 | 15361511 + | 5  | 655  | 2.30  |
| LOC_Os11g24760.1 | retrotransposon protein, putative, Ty3-gypsy subclass, expressed       | Chr11 | 14102723 | 14105728 + | 2  | 2983 | 2.32  |
| LOC_Os07g07770.1 | ribosomal protein S13p/S18e, putative, expressed                       | Chr7  | 3896681  | 3899826 +  | 3  | 333  | 2.32  |
| LOC_Os02g10370.1 | hrpN-interacting protein from Malus, putative, expressed               | Chr2  | 5464034  | 5464324 -  | 2  | 250  | 2.33  |
| LOC_Os12g15490.1 | expressed protein                                                      | Chr12 | 8846057  | 8846458 +  | 3  | 354  | 2.33  |
| LOC_Os05g45910.1 | expressed protein                                                      | Chr5  | 26605226 | 26607098 - | 3  | 408  | 2.33  |
| LOC_Os08g42240.1 | expressed protein                                                      | Chr8  | 26672686 | 26673265 - | 2  | 430  | 2.33  |
| LOC_Os08g18830.1 | zinc knuckle family protein, expressed                                 | Chr8  | 11237649 | 11242942 - | 2  | 4378 | 2.36  |
| LOC_Os12g31000.1 | pumilio-family RNA binding repeat domain containing protein, expressed | Chr12 | 18618482 | 18621147 + | 5  | 2170 | 2.36  |
| LOC_Os09g27135.1 | expressed protein                                                      | Chr9  | 16499216 | 16501586 - | 3  | 1254 | 2.43  |
| LOC_Os07g27450.1 | expressed protein                                                      | Chr7  | 15990882 | 15994107 + | 2  | 1181 | 2.43  |
| LOC_Os04g58490.1 | expressed protein                                                      | Chr4  | 34790785 | 34791388 - | 3  | 321  | 2.43  |
| LOC_Os03g24920.1 | ubiquitin family protein, putative, expressed                          | Chr3  | 14197229 | 14197575 - | 2  | 331  | 2.43  |
| LOC_Os08g32820.1 | variant latency associated nuclear antigen, putative                   | Chr8  | 20342558 | 20343583 + | 3  | 804  | 2.43  |
| LOC_Os01g11470.1 | expressed protein                                                      | Chr1  | 6182163  | 6182516 +  | 1  | 386  | 2.44  |
| LOC_Os07g16150.1 | expressed protein                                                      | Chr7  | 9405827  | 9407220 +  | 4  | 791  | 2.44  |
| LOC_Os01g18890.1 | peroxidase precursor, putative, expressed                              | Chr1  | 10679488 | 10682188 - | 2  | 832  | 2.44  |
| LOC_Os03g51459.1 | expressed protein                                                      | Chr3  | 29448143 | 29450245 - | 3  | 843  | 2.44  |



|                  |                                                                                  |       |          |          |   |    |      |      |
|------------------|----------------------------------------------------------------------------------|-------|----------|----------|---|----|------|------|
| LOC_Os02g43230.1 | expressed protein                                                                | Chr2  | 26047569 | 26048033 | + | 1  | 497  | 2.44 |
| LOC_Os11g27740.1 | retrotransposon protein, putative, Ty3-gypsy subclass, expressed                 | Chr11 | 15966421 | 15970437 | + | 9  | 2052 | 2.49 |
| LOC_Os06g47850.1 | zinc finger family protein, putative, expressed                                  | Chr6  | 28958626 | 28960418 | + | 4  | 1564 | 2.49 |
| LOC_Os08g16120.1 | disease resistance protein RPM1, putative, expressed                             | Chr8  | 9824627  | 9828471  | + | 3  | 3314 | 2.49 |
| LOC_Os08g16120.2 | disease resistance protein RPM1, putative, expressed                             | Chr8  | 9824627  | 9828471  | + | 4  | 3371 | 2.49 |
| LOC_Os02g29300.1 | expressed protein                                                                | Chr2  | 17406610 | 17411180 | - | 6  | 2265 | 2.49 |
| LOC_Os01g21170.1 | expressed protein                                                                | Chr1  | 11810685 | 11811951 | + | 1  | 1299 | 2.53 |
| LOC_Os02g24624.1 | conserved hypothetical protein                                                   | Chr2  | 14281752 | 14281964 | + | 1  | 245  | 2.53 |
| LOC_Os09g22550.1 | transposon protein, putative, unclassified                                       | Chr9  | 13603144 | 13603368 | + | 1  | 257  | 2.54 |
| LOC_Os09g31031.3 | ubiquitin family protein, putative, expressed                                    | Chr9  | 18669317 | 18671173 | + | 3  | 762  | 2.54 |
| LOC_Os06g27730.1 | retrotransposon protein, putative, unclassified, expressed                       | Chr6  | 15704876 | 15706910 | + | 3  | 798  | 2.54 |
| LOC_Os04g33560.1 | expressed protein                                                                | Chr4  | 20304563 | 20306181 | + | 2  | 992  | 2.54 |
| LOC_Os04g40750.1 | expressed protein                                                                | Chr4  | 24187919 | 24188910 | + | 2  | 916  | 2.54 |
| LOC_Os01g21500.1 | retrotransposon protein, putative, unclassified                                  | Chr1  | 12010580 | 12011810 | - | 2  | 1228 | 2.54 |
| LOC_Os03g46940.1 | expressed protein                                                                | Chr3  | 26543216 | 26543446 | - | 1  | 263  | 2.54 |
| LOC_Os03g51264.1 | expressed protein                                                                | Chr3  | 29326295 | 29326728 | - | 2  | 289  | 2.54 |
| LOC_Os12g06930.1 | expressed protein                                                                | Chr12 | 3384443  | 3384817  | - | 1  | 407  | 2.54 |
| LOC_Os07g15130.1 | expressed protein                                                                | Chr7  | 8681594  | 8682828  | + | 3  | 504  | 2.54 |
| LOC_Os06g17170.1 | retrotransposon protein, putative, unclassified                                  | Chr6  | 9953740  | 9956436  | - | 3  | 546  | 2.54 |
| LOC_Os03g52400.1 | ribosomal protein L7/L12 C-terminal domain containing protein, expressed         | Chr3  | 30080571 | 30081435 | - | 1  | 897  | 2.54 |
| LOC_Os06g28720.1 | expressed protein                                                                | Chr6  | 16352388 | 16353257 | + | 1  | 902  | 2.54 |
| LOC_Os02g18490.1 | LTPL53 - Protease inhibitor/seed storage/LTP family protein precursor, expressed | Chr2  | 10764509 | 10767402 | + | 4  | 944  | 2.54 |
| LOC_Os09g37380.1 | OsSAUR42 - Auxin-responsive SAUR gene family member, expressed                   | Chr9  | 21579912 | 21580334 | + | 1  | 455  | 2.54 |
| LOC_Os12g31770.2 | expressed protein                                                                | Chr12 | 19119314 | 19120005 | + | 2  | 528  | 2.54 |
| LOC_Os12g22760.4 | expressed protein                                                                | Chr12 | 12845190 | 12847897 | + | 5  | 1636 | 2.54 |
| LOC_Os04g40350.1 | GRF zinc finger family protein                                                   | Chr4  | 23990892 | 23991709 | - | 3  | 750  | 2.56 |
| LOC_Os04g53020.1 | GRF zinc finger family protein                                                   | Chr4  | 31575624 | 31576441 | + | 3  | 750  | 2.56 |
| LOC_Os01g45174.1 | transposon protein, putative, unclassified, expressed                            | Chr1  | 25630010 | 25636071 | - | 8  | 2434 | 2.60 |
| LOC_Os01g59540.1 | GRF zinc finger family protein                                                   | Chr1  | 34425818 | 34427049 | + | 4  | 1040 | 2.62 |
| LOC_Os01g25189.6 | delta14-sterol reductase, putative, expressed                                    | Chr1  | 14225415 | 14233656 | - | 14 | 2059 | 2.62 |
| LOC_Os01g24370.1 | retrotransposon protein, putative, unclassified                                  | Chr1  | 13740304 | 13741112 | - | 3  | 537  | 2.63 |
| LOC_Os06g28970.1 | bolA, putative, expressed                                                        | Chr6  | 16509328 | 16512902 | + | 3  | 926  | 2.63 |
| LOC_Os07g27660.1 | transposon protein, putative, Pong sub-class                                     | Chr7  | 16146315 | 16147346 | - | 2  | 1063 | 2.63 |
| LOC_Os04g09560.1 | tesmin/TSO1-like CXC domain containing protein, expressed                        | Chr4  | 5130826  | 5132553  | - | 5  | 604  | 2.63 |
| LOC_Os10g36030.1 | cytochrome b561, putative, expressed                                             | Chr10 | 19255873 | 19258067 | - | 4  | 821  | 2.63 |
| LOC_Os12g02630.1 | cytochrome P450 72A1, putative, expressed                                        | Chr12 | 910825   | 912396   | + | 3  | 1279 | 2.63 |
| LOC_Os08g15050.1 | CCT/B-box zinc finger protein, putative, expressed                               | Chr8  | 9098573  | 9099880  | + | 1  | 1340 | 2.63 |
| LOC_Os08g39270.1 | fasciclin domain containing protein, expressed                                   | Chr8  | 24818308 | 24820452 | - | 2  | 1343 | 2.63 |
| LOC_Os03g14110.1 | expressed protein                                                                | Chr3  | 7667922  | 7670731  | + | 5  | 1360 | 2.63 |
| LOC_Os06g47310.1 | plant-specific domain TIGR01627 family protein, expressed                        | Chr6  | 28679459 | 28681004 | + | 2  | 1540 | 2.63 |
| LOC_Os08g14050.1 | expressed protein                                                                | Chr8  | 8415405  | 8418565  | - | 5  | 1603 | 2.63 |
| LOC_Os02g11940.2 | sterol glucosyltransferase, putative, expressed                                  | Chr2  | 6188722  | 6193629  | + | 14 | 2055 | 2.64 |
| LOC_Os10g27080.1 | expressed protein                                                                | Chr10 | 14271508 | 14272625 | + | 3  | 849  | 2.64 |
| LOC_Os11g40030.2 | cyclin-dependent kinase inhibitor, putative, expressed                           | Chr11 | 23866060 | 23867908 | + | 4  | 921  | 2.64 |
| LOC_Os03g48160.1 | phosphomevalonate kinase, putative, expressed                                    | Chr3  | 27403359 | 27405535 | + | 8  | 1066 | 2.64 |

|                  |                                                                                             |       |          |            |   |      |      |
|------------------|---------------------------------------------------------------------------------------------|-------|----------|------------|---|------|------|
| LOC_Os03g30290.1 | expressed protein                                                                           | Chr3  | 17285861 | 17287294 + | 1 | 1466 | 2.64 |
| LOC_Os02g52870.1 | zinc finger, C3HC4 type domain containing protein, expressed                                | Chr2  | 32324316 | 32326103 + | 3 | 1501 | 2.64 |
| LOC_Os09g20579.1 | expressed protein                                                                           | Chr9  | 12397884 | 12398457 + | 1 | 606  | 2.64 |
| LOC_Os03g08710.1 | THION26 - Plant thionin family protein precursor, expressed                                 | Chr3  | 4489669  | 4490552 +  | 2 | 791  | 2.64 |
| LOC_Os03g08710.2 | THION26 - Plant thionin family protein precursor, expressed                                 | Chr3  | 4489695  | 4490552 +  | 1 | 890  | 2.64 |
| LOC_Os09g30462.1 | expressed protein                                                                           | Chr9  | 18564834 | 18565737 + | 1 | 936  | 2.64 |
| LOC_Os02g39910.1 | B4-BTB1 - Bric-a-Brac, Tramtrack, Broad Complex BTB domain with B4 subfamily conserved sequ | Chr2  | 24133183 | 24139373 - | 1 | 6223 | 2.65 |
| LOC_Os06g05050.1 | OsWAK61 - OsWAK receptor-like protein kinase, expressed                                     | Chr6  | 2229206  | 2233267 +  | 5 | 2695 | 2.67 |
| LOC_Os02g02740.1 | PPR repeat containing protein, expressed                                                    | Chr2  | 1038334  | 1039710 -  | 1 | 1409 | 2.68 |
| LOC_Os09g25960.1 | glutamate receptor, putative, expressed                                                     | Chr9  | 15588270 | 15594378 - | 5 | 2962 | 2.69 |
| LOC_Os04g51450.1 | glycosyl hydrolases family 16, putative, expressed                                          | Chr4  | 30473364 | 30475160 - | 3 | 1662 | 2.69 |
| LOC_Os03g45720.1 | glyoxalase family protein, putative, expressed                                              | Chr3  | 25801614 | 25804500 - | 3 | 825  | 2.69 |
| LOC_Os09g11110.1 | retrotransposon protein, putative, unclassified, expressed                                  | Chr9  | 6160766  | 6163707 -  | 7 | 2249 | 2.70 |
| LOC_Os12g11810.1 | retrotransposon protein, putative, Ty3-gypsy subclass, expressed                            | Chr12 | 6410324  | 6414745 -  | 2 | 4288 | 2.71 |
| LOC_Os01g39080.1 | expressed protein                                                                           | Chr1  | 21967984 | 21968571 + | 2 | 577  | 2.72 |
| LOC_Os05g16710.1 | retrotransposon protein, putative, unclassified                                             | Chr5  | 9500782  | 9502982 +  | 4 | 650  | 2.72 |
| LOC_Os02g47370.1 | transcription factor TF2, putative, expressed                                               | Chr2  | 28921176 | 28921795 - | 1 | 652  | 2.72 |
| LOC_Os08g09990.1 | expressed protein                                                                           | Chr8  | 5774033  | 5776437 -  | 5 | 823  | 2.72 |
| LOC_Os11g13420.2 | RNA binding protein, putative, expressed                                                    | Chr11 | 7346985  | 7348825 -  | 5 | 930  | 2.72 |
| LOC_Os11g12350.1 | disease resistance protein, putative, expressed                                             | Chr11 | 6896964  | 6898774 +  | 2 | 1201 | 2.72 |
| LOC_Os04g29500.1 | retrotransposon protein, putative, unclassified                                             | Chr4  | 17532216 | 17533573 - | 2 | 1229 | 2.72 |
| LOC_Os01g73920.1 | hypothetical protein                                                                        | Chr1  | 42830103 | 42830920 - | 2 | 397  | 2.72 |
| LOC_Os03g47210.1 | expressed protein                                                                           | Chr3  | 26722020 | 26722640 - | 1 | 653  | 2.72 |
| LOC_Os02g22600.1 | retrotransposon protein, putative, unclassified, expressed                                  | Chr2  | 13471767 | 13472502 + | 2 | 727  | 2.72 |
| LOC_Os12g36060.1 | expressed protein                                                                           | Chr12 | 22100818 | 22101538 + | 1 | 753  | 2.72 |
| LOC_Os03g02610.1 | glycosyl hydrolases family 16 protein, protein, expressed                                   | Chr3  | 964180   | 965338 +   | 1 | 1191 | 2.72 |
| LOC_Os01g60730.2 | RING-H2 finger protein, putative, expressed                                                 | Chr1  | 35121641 | 35122989 - | 1 | 1381 | 2.72 |
| LOC_Os10g40280.1 | expressed protein                                                                           | Chr10 | 21592730 | 21594387 + | 1 | 1690 | 2.72 |
| LOC_Os11g01990.1 | expressed protein                                                                           | Chr11 | 531013   | 532077 -   | 2 | 493  | 2.73 |
| LOC_Os02g08520.1 | peptidase, T1 family, putative, expressed                                                   | Chr2  | 4599038  | 4601200 -  | 6 | 834  | 2.73 |
| LOC_Os11g02350.1 | LTPL25 - Protease inhibitor/seed storage/LTP family protein precursor, expressed            | Chr11 | 684611   | 685626 +   | 2 | 990  | 2.73 |
| LOC_Os05g33760.1 | PPR repeat domain containing protein, putative, expressed                                   | Chr5  | 19894469 | 19899832 - | 3 | 1854 | 2.73 |
| LOC_Os07g18980.1 | expressed protein                                                                           | Chr7  | 11234053 | 11234499 + | 2 | 421  | 2.73 |
| LOC_Os07g42130.1 | expressed protein                                                                           | Chr7  | 25211174 | 25211956 + | 2 | 749  | 2.73 |
| LOC_Os10g39489.1 | retrotransposon protein, putative, unclassified, expressed                                  | Chr10 | 21086303 | 21087310 - | 2 | 937  | 2.73 |
| LOC_Os07g38000.1 | cytochrome c, putative, expressed                                                           | Chr7  | 22798819 | 22800257 - | 5 | 1125 | 2.73 |
| LOC_Os12g12650.1 | retrotransposon protein, putative, unclassified, expressed                                  | Chr12 | 6971657  | 6977754 +  | 6 | 1290 | 2.73 |
| LOC_Os04g05040.1 | transposon protein, putative, unclassified, expressed                                       | Chr4  | 2448851  | 2451024 -  | 3 | 1713 | 2.73 |
| LOC_Os02g27769.1 | 40S ribosomal protein S27, putative, expressed                                              | Chr2  | 16445789 | 16446230 + | 3 | 234  | 2.73 |
| LOC_Os02g31920.1 | expressed protein                                                                           | Chr2  | 18859234 | 18860105 + | 3 | 787  | 2.73 |
| LOC_Os10g19850.1 | expressed protein                                                                           | Chr10 | 9895838  | 9897297 -  | 2 | 913  | 2.73 |
| LOC_Os06g25520.1 | retrotransposon protein, putative, unclassified, expressed                                  | Chr6  | 14922636 | 14926141 + | 4 | 1037 | 2.73 |
| LOC_Os03g55430.1 | expressed protein                                                                           | Chr3  | 31537854 | 31538849 + | 2 | 985  | 2.73 |
| LOC_Os08g18890.1 | expressed protein                                                                           | Chr8  | 11267744 | 11268082 + | 1 | 371  | 2.73 |
| LOC_Os07g47900.1 | retrotransposon protein, putative, unclassified                                             | Chr7  | 28607602 | 28610118 - | 4 | 563  | 2.73 |

|                  |                                                                                      |       |          |            |    |      |      |
|------------------|--------------------------------------------------------------------------------------|-------|----------|------------|----|------|------|
| LOC_Os04g52580.1 | tetratricopeptide repeat domain containing protein, expressed                        | Chr4  | 31260095 | 31262441 - | 5  | 1120 | 2.74 |
| LOC_Os05g19870.1 | retrotransposon protein, putative, Ty3-gypsy subclass, expressed                     | Chr5  | 11574774 | 11581500 - | 3  | 5469 | 2.74 |
| LOC_Os02g54930.1 | expressed protein                                                                    | Chr2  | 33641472 | 33644308 + | 5  | 703  | 2.75 |
| LOC_Os04g57720.1 | OsRR6 type-A response regulator, expressed                                           | Chr4  | 34375978 | 34377357 + | 2  | 1340 | 2.75 |
| LOC_Os06g15640.1 | retrotransposon protein, putative, unclassified, expressed                           | Chr6  | 8857881  | 8863470 +  | 5  | 4267 | 2.75 |
| LOC_Os04g34420.1 | serine/threonine-protein kinase receptor precursor, putative, expressed              | Chr4  | 20843256 | 20845682 + | 1  | 2459 | 2.75 |
| LOC_Os03g14690.1 | vacuolar ATP synthase 98 kDa subunit, putative, expressed                            | Chr3  | 7982396  | 7989437 +  | 18 | 3605 | 2.75 |
| LOC_Os01g62970.2 | expressed protein                                                                    | Chr1  | 36479579 | 36484051 + | 6  | 1273 | 2.76 |
| LOC_Os12g22760.2 | expressed protein                                                                    | Chr12 | 12845190 | 12847897 + | 5  | 1820 | 2.77 |
| LOC_Os12g22760.3 | expressed protein                                                                    | Chr12 | 12845190 | 12847897 + | 6  | 1767 | 2.77 |
| LOC_Os01g01410.1 | TKL_IRAK_C-LEC.1 - TKL_IRAK_C-LEC has homology to C-type lectin receptors, expressed | Chr1  | 205710   | 209606 -   | 4  | 2617 | 2.78 |
| LOC_Os01g01410.2 | TKL_IRAK_C-LEC.1 - TKL_IRAK_C-LEC has homology to C-type lectin receptors, expressed | Chr1  | 205710   | 209606 -   | 4  | 2614 | 2.78 |
| LOC_Os05g41800.1 | ribosomal protein L11 methyltransferase-related, putative, expressed                 | Chr5  | 24480751 | 24483094 + | 7  | 1719 | 2.78 |
| LOC_Os02g11940.1 | sterol glucosyltransferase, putative, expressed                                      | Chr2  | 6188722  | 6193632 +  | 15 | 2301 | 2.78 |
| LOC_Os02g49690.1 | ACT domain-containing protein, putative, expressed                                   | Chr2  | 30364405 | 30365822 + | 3  | 1229 | 2.78 |
| LOC_Os07g38630.1 | expressed protein                                                                    | Chr7  | 23202826 | 23203312 + | 2  | 259  | 2.81 |
| LOC_Os07g26740.1 | 60S ribosomal protein L44, putative, expressed                                       | Chr7  | 15448959 | 15451104 + | 4  | 446  | 2.81 |
| LOC_Os05g25870.2 | N-dimethylguanosine tRNA methyltransferase, putative, expressed                      | Chr5  | 15054708 | 15056472 - | 4  | 946  | 2.81 |
| LOC_Os02g04325.1 | expressed protein                                                                    | Chr2  | 1905767  | 1908082 +  | 3  | 955  | 2.81 |
| LOC_Os12g02070.1 | expressed protein                                                                    | Chr12 | 616624   | 617637 -   | 3  | 676  | 2.81 |
| LOC_Os01g60730.1 | RING-H2 finger protein, putative, expressed                                          | Chr1  | 35121625 | 35122986 - | 2  | 1357 | 2.81 |
| LOC_Os01g14080.1 | lipase class 3 family protein, putative, expressed                                   | Chr1  | 7879931  | 7882632 -  | 2  | 1604 | 2.81 |
| LOC_Os08g25660.1 | transposon protein, putative, unclassified, expressed                                | Chr8  | 15611325 | 15614185 - | 5  | 1690 | 2.81 |
| LOC_Os05g20590.1 | expressed protein                                                                    | Chr5  | 12084788 | 12086334 + | 3  | 441  | 2.81 |
| LOC_Os12g19120.1 | transposon protein, putative, unclassified, expressed                                | Chr12 | 11100886 | 11102145 + | 2  | 532  | 2.81 |
| LOC_Os01g27060.1 | retrotransposon, putative, centromere-specific, expressed                            | Chr1  | 15094011 | 15096404 + | 4  | 626  | 2.81 |
| LOC_Os04g14810.1 | 3-5 exonuclease domain-containing protein, putative, expressed                       | Chr4  | 8320563  | 8321450 -  | 1  | 920  | 2.81 |
| LOC_Os05g25870.1 | N-dimethylguanosine tRNA methyltransferase, putative, expressed                      | Chr5  | 15054708 | 15056028 - | 3  | 1079 | 2.81 |
| LOC_Os05g26840.1 | permease domain containing protein, putative, expressed                              | Chr5  | 15574252 | 15576162 - | 1  | 1943 | 2.81 |
| LOC_Os03g22790.1 | beta-amylase, putative, expressed                                                    | Chr3  | 13161913 | 13164014 + | 2  | 2086 | 2.81 |
| LOC_Os02g46730.1 | expressed protein                                                                    | Chr2  | 28538658 | 28543024 + | 9  | 2119 | 2.81 |
| LOC_Os09g08480.1 | expressed protein                                                                    | Chr9  | 4426809  | 4428345 -  | 3  | 933  | 2.81 |
| LOC_Os07g02550.1 | expressed protein                                                                    | Chr7  | 918399   | 919310 -   | 1  | 944  | 2.81 |
| LOC_Os06g41240.1 | expressed protein                                                                    | Chr6  | 24680279 | 24681229 - | 1  | 983  | 2.81 |
| LOC_Os05g13580.1 | OsCML18 - Calmodulin-related calcium sensor protein, expressed                       | Chr5  | 7533633  | 7534664 -  | 1  | 1064 | 2.81 |
| LOC_Os07g38000.2 | cytochrome c, putative, expressed                                                    | Chr7  | 22798819 | 22800192 - | 4  | 1108 | 2.81 |
| LOC_Os03g12560.1 | expressed protein                                                                    | Chr3  | 6654500  | 6656681 -  | 2  | 1259 | 2.81 |
| LOC_Os07g36970.1 | transposon protein, putative, unclassified, expressed                                | Chr7  | 22131637 | 22133774 + | 4  | 1535 | 2.81 |
| LOC_Os11g09130.1 | receptor-like protein kinase 5 precursor, putative, expressed                        | Chr11 | 4860885  | 4862816 +  | 1  | 1964 | 2.81 |
| LOC_Os07g07719.1 | ribosomal protein S13p/S18e, putative, expressed                                     | Chr7  | 3883541  | 3885517 +  | 3  | 607  | 2.81 |
| LOC_Os06g38603.1 | retrotransposon protein, putative, unclassified, expressed                           | Chr6  | 22900051 | 22901169 + | 1  | 1151 | 2.81 |
| LOC_Os11g32410.1 | expressed protein                                                                    | Chr11 | 19134085 | 19137450 - | 4  | 1249 | 2.81 |
| LOC_Os02g52010.1 | phosphate-induced protein 1 conserved region domain containing protein, expressed    | Chr2  | 31840427 | 31841847 - | 1  | 1453 | 2.81 |
| LOC_Os03g48230.1 | expressed protein                                                                    | Chr3  | 27448809 | 27449258 - | 1  | 482  | 2.82 |
| LOC_Os07g10254.1 | expressed protein                                                                    | Chr7  | 5507023  | 5507723 +  | 1  | 733  | 2.82 |

|                       |                                                                                                |       |          |            |    |      |      |
|-----------------------|------------------------------------------------------------------------------------------------|-------|----------|------------|----|------|------|
| LOC_Os01g10640.1      | expressed protein                                                                              | Chr1  | 5685594  | 5686401 +  | 1  | 840  | 2.82 |
| LOC_Os05g46770.1      | expressed protein                                                                              | Chr5  | 27085232 | 27089314 + | 5  | 3395 | 2.83 |
| LOC_Os05g48650.1      | transcription factor HBP-1b, putative, expressed                                               | Chr5  | 27883503 | 27884410 - | 1  | 940  | 2.85 |
| LOC_Os05g34130.1      | expressed protein                                                                              | Chr5  | 20178223 | 20180152 - | 1  | 1962 | 2.87 |
| LOC_Os05g11540.1      | expressed protein                                                                              | Chr5  | 6529761  | 6530504 -  | 2  | 448  | 2.88 |
| LOC_Os03g11080.1      | expressed protein                                                                              | Chr3  | 5698284  | 5699187 +  | 2  | 393  | 2.88 |
| LOC_Os06g50620.1      | expressed protein                                                                              | Chr6  | 30638237 | 30639753 - | 3  | 846  | 2.88 |
| LOC_Os06g50770.1      | expressed protein                                                                              | Chr6  | 30718413 | 30719929 - | 3  | 846  | 2.88 |
| LOC_Os05g30990.1      | zinc finger protein, putative, expressed                                                       | Chr5  | 18003906 | 18007099 - | 4  | 764  | 2.89 |
| ChrSy.fgenesh.mRNA.82 | expressed protein                                                                              | ChrSy | 558985   | 561654 +   | 9  | 1431 | 2.89 |
| LOC_Os10g05730.2      | armadillo/beta-catenin repeat family protein, putative, expressed                              | Chr10 | 2887353  | 2889781 -  | 1  | 2461 | 2.89 |
| LOC_Os07g15980.1      | expressed protein                                                                              | Chr7  | 9315697  | 9316094 -  | 2  | 313  | 2.89 |
| LOC_Os03g63740.1      | NFD2, putative, expressed                                                                      | Chr3  | 35985993 | 35986962 - | 1  | 1002 | 2.89 |
| LOC_Os10g30280.1      | OsFBX386 - F-box domain containing protein, expressed                                          | Chr10 | 15730619 | 15734015 + | 5  | 1580 | 2.89 |
| LOC_Os08g02250.1      | IQ calmodulin-binding motif domain containing protein, expressed                               | Chr8  | 795184   | 797588 -   | 4  | 2288 | 2.89 |
| LOC_Os02g07330.1      | expressed protein                                                                              | Chr2  | 3772299  | 3776107 +  | 9  | 2319 | 2.89 |
| LOC_Os02g06260.1      | phytosulfokine receptor precursor, putative, expressed                                         | Chr2  | 3126962  | 3129256 -  | 1  | 2327 | 2.89 |
| LOC_Os09g36630.1      | expressed protein                                                                              | Chr9  | 21134490 | 21136832 + | 1  | 2375 | 2.89 |
| LOC_Os01g08190.5      | transcriptional corepressor LEUNIG, putative, expressed                                        | Chr1  | 3976431  | 3981736 +  | 12 | 2363 | 2.89 |
| LOC_Os01g49280.1      | zinc finger family protein, putative, expressed                                                | Chr1  | 28325361 | 28328256 - | 9  | 1906 | 2.89 |
| LOC_Os03g58230.1      | plant-specific domain TIGR01615 family protein, expressed                                      | Chr3  | 33169840 | 33172105 + | 3  | 2148 | 2.89 |
| LOC_Os05g03120.2      | retrotransposon protein, putative, unclassified, expressed                                     | Chr5  | 1240299  | 1245320 +  | 4  | 2456 | 2.89 |
| LOC_Os05g03120.3      | retrotransposon protein, putative, unclassified, expressed                                     | Chr5  | 1240299  | 1245353 +  | 4  | 2491 | 2.89 |
| LOC_Os05g03120.1      | retrotransposon protein, putative, unclassified, expressed                                     | Chr5  | 1240299  | 1245353 +  | 4  | 2494 | 2.89 |
| LOC_Os07g07990.1      | uncharacterized protein At4g06744 precursor, putative, expressed                               | Chr7  | 4029227  | 4030855 -  | 1  | 1661 | 2.89 |
| LOC_Os04g08340.1      | OsSigP3 - Putative Type I Signal Peptidase homologue%3B employs a putative Ser/Lys catalytic d | Chr4  | 4452696  | 4455350 +  | 4  | 1140 | 2.89 |
| LOC_Os02g42650.1      | expansin precursor, putative, expressed                                                        | Chr2  | 25652321 | 25659494 + | 4  | 1657 | 2.89 |
| LOC_Os09g32020.1      | ubiquitin fusion degradation protein, putative, expressed                                      | Chr9  | 19114990 | 19118017 - | 6  | 1941 | 2.89 |
| LOC_Os11g40249.3      | expressed protein                                                                              | Chr11 | 24001622 | 24008963 + | 5  | 2198 | 2.89 |
| LOC_Os11g05060.1      | expressed protein                                                                              | Chr11 | 2212491  | 2214420 -  | 3  | 429  | 2.90 |
| LOC_Os04g48020.1      | 3-hexulose-6-phosphate isomerase, putative, expressed                                          | Chr4  | 28573085 | 28573893 + | 1  | 841  | 2.90 |
| LOC_Os02g45940.1      | Core histone H2A/H2B/H3/H4 domain containing protein, putative, expressed                      | Chr2  | 27993898 | 27994741 - | 1  | 876  | 2.90 |
| LOC_Os01g25240.1      | expressed protein                                                                              | Chr1  | 14252929 | 14257384 + | 9  | 1467 | 2.92 |
| LOC_Os02g41610.1      | expressed protein                                                                              | Chr2  | 24953147 | 24960258 + | 5  | 3218 | 2.94 |
| LOC_Os05g02050.1      | mitochondrial import inner membrane translocase subunit Tim, putative, expressed               | Chr5  | 599360   | 599710 -   | 2  | 334  | 2.96 |
| LOC_Os11g07860.1      | expressed protein                                                                              | Chr11 | 4014652  | 4016954 +  | 5  | 463  | 2.96 |
| LOC_Os03g01840.1      | knotted 1-binding protein 36, putative, expressed                                              | Chr3  | 509215   | 510284 -   | 4  | 641  | 2.96 |
| LOC_Os09g32960.3      | expressed protein                                                                              | Chr9  | 19671252 | 19673501 + | 2  | 979  | 2.96 |
| LOC_Os02g35315.2      | expressed protein                                                                              | Chr2  | 21234551 | 21236111 - | 4  | 818  | 2.96 |
| LOC_Os02g35315.1      | expressed protein                                                                              | Chr2  | 21234551 | 21236111 - | 4  | 822  | 2.96 |
| LOC_Os09g17860.1      | retrotransposon protein, putative, unclassified, expressed                                     | Chr9  | 10927129 | 10927974 + | 1  | 878  | 2.96 |
| LOC_Os07g07930.1      | LTP178 - Protease inhibitor/seed storage/LTP family protein precursor, expressed               | Chr7  | 3980211  | 3981284 +  | 2  | 1038 | 2.96 |
| LOC_Os04g52090.1      | AP2 domain containing protein, expressed                                                       | Chr4  | 30939177 | 30940275 + | 1  | 1131 | 2.96 |
| LOC_Os06g04870.1      | homeobox associated leucine zipper, putative, expressed                                        | Chr6  | 2137450  | 2139101 +  | 2  | 1605 | 2.96 |
| LOC_Os10g04610.2      | OsFBX360 - F-box domain containing protein, expressed                                          | Chr10 | 2196559  | 2198967 +  | 2  | 1739 | 2.96 |

|                  |                                                                                   |       |          |            |    |      |      |
|------------------|-----------------------------------------------------------------------------------|-------|----------|------------|----|------|------|
| LOC_Os09g32610.1 | expressed protein                                                                 | Chr9  | 19458952 | 19462724 - | 5  | 2228 | 2.96 |
| LOC_Os02g46260.5 | OsSCP9 - Putative Serine Carboxypeptidase homologue, expressed                    | Chr2  | 28212066 | 28217277 + | 13 | 2394 | 2.96 |
| LOC_Os03g49820.1 | expressed protein                                                                 | Chr3  | 28371847 | 28375160 + | 5  | 943  | 2.97 |
| LOC_Os12g02880.1 | E2F-related protein, putative, expressed                                          | Chr12 | 1052828  | 1053879 +  | 2  | 1010 | 2.97 |
| LOC_Os09g10204.1 | expressed protein                                                                 | Chr9  | 5556531  | 5557872 +  | 1  | 1374 | 2.97 |
| LOC_Os04g35114.1 | receptor-like kinase, putative, expressed                                         | Chr4  | 21340765 | 21344577 + | 8  | 2058 | 2.97 |
| LOC_Os01g68650.1 | plant-specific domain TIGR01615 family protein, expressed                         | Chr1  | 39866338 | 39867460 - | 1  | 1155 | 2.97 |
| LOC_Os03g47190.1 | expressed protein                                                                 | Chr3  | 26706239 | 26708042 - | 1  | 1836 | 2.97 |
| LOC_Os02g51260.1 | retrotransposon protein, putative, unclassified, expressed                        | Chr2  | 31385511 | 31388559 - | 5  | 2734 | 2.97 |
| LOC_Os08g16790.1 | DUF593 domain containing protein, expressed                                       | Chr8  | 10269496 | 10270934 - | 1  | 1471 | 2.97 |
| LOC_Os11g03590.1 | EMB1379, putative, expressed                                                      | Chr11 | 1392723  | 1394979 +  | 6  | 1704 | 2.97 |
| LOC_Os06g12100.1 | mTERF family protein, expressed                                                   | Chr6  | 6479283  | 6480980 -  | 1  | 1730 | 2.97 |
| LOC_Os09g23860.1 | retrotransposon protein, putative, Ty3-gypsy subclass, expressed                  | Chr9  | 14226131 | 14229706 - | 5  | 2068 | 2.97 |
| LOC_Os03g02830.1 | cell cycle control protein, putative, expressed                                   | Chr3  | 1102447  | 1106646 -  | 9  | 2141 | 2.97 |
| LOC_Os02g51414.1 | expressed protein                                                                 | Chr2  | 31495093 | 31495799 - | 1  | 739  | 2.97 |
| LOC_Os04g58940.1 | expressed protein                                                                 | Chr4  | 35064007 | 35064548 - | 1  | 574  | 2.97 |
| LOC_Os08g39610.1 | expressed protein                                                                 | Chr8  | 25067870 | 25068460 - | 1  | 623  | 2.97 |
| LOC_Os06g42210.1 | expressed protein                                                                 | Chr6  | 25345433 | 25346334 - | 2  | 826  | 2.97 |
| LOC_Os11g33240.3 | citrate synthase, putative, expressed                                             | Chr11 | 19649309 | 19655980 + | 19 | 2770 | 2.98 |
| LOC_Os11g33240.2 | citrate synthase, putative, expressed                                             | Chr11 | 19649309 | 19655980 + | 20 | 2859 | 2.98 |
| LOC_Os11g33240.1 | citrate synthase, putative, expressed                                             | Chr11 | 19649309 | 19655980 + | 20 | 2873 | 2.98 |
| LOC_Os02g16880.1 | protein of unknown function DUF502 domain containing protein, expressed           | Chr2  | 9617783  | 9623835 -  | 7  | 1635 | 2.99 |
| LOC_Os04g40560.1 | WD domain, G-beta repeat domain containing protein, expressed                     | Chr4  | 24086334 | 24088075 - | 1  | 1774 | 2.99 |
| LOC_Os07g12230.1 | expressed protein                                                                 | Chr7  | 6848016  | 6853390 +  | 6  | 1575 | 3.00 |
| LOC_Os06g49110.3 | delta-aminolevulinic acid dehydratase, chloroplast precursor, putative, expressed | Chr6  | 29757045 | 29761643 - | 12 | 2637 | 3.01 |
| LOC_Os06g49110.1 | delta-aminolevulinic acid dehydratase, chloroplast precursor, putative, expressed | Chr6  | 29757045 | 29761835 - | 13 | 2614 | 3.01 |
| LOC_Os06g49110.2 | delta-aminolevulinic acid dehydratase, chloroplast precursor, putative, expressed | Chr6  | 29757045 | 29761659 - | 11 | 2709 | 3.01 |
| LOC_Os01g42170.1 | zinc knuckle family protein, expressed                                            | Chr1  | 23903468 | 23908372 - | 1  | 4937 | 3.01 |
| LOC_Os03g37090.1 | expressed protein                                                                 | Chr3  | 20558987 | 20561470 - | 4  | 560  | 3.02 |
| LOC_Os07g18720.1 | tetratricopeptide repeat containing protein, putative, expressed                  | Chr7  | 11064790 | 11076993 + | 18 | 2420 | 3.02 |
| LOC_Os03g17130.1 | bHelix-loop-helix transcription factor, putative, expressed                       | Chr3  | 9513353  | 9518158 -  | 13 | 2172 | 3.03 |
| LOC_Os06g47420.1 | transposon protein, putative, unclassified, expressed                             | Chr6  | 28726645 | 28728264 - | 2  | 867  | 3.03 |
| LOC_Os01g73024.1 | expressed protein                                                                 | Chr1  | 42369770 | 42370365 + | 1  | 628  | 3.03 |
| LOC_Os03g03360.1 | ribosomal protein L5, putative, expressed                                         | Chr3  | 1432787  | 1435347 -  | 3  | 2133 | 3.03 |
| LOC_Os12g18550.1 | expressed protein                                                                 | Chr12 | 10724195 | 10725087 + | 3  | 818  | 3.03 |
| LOC_Os01g48690.2 | ribosomal protein rpS20, putative, expressed                                      | Chr1  | 27922318 | 27924368 + | 2  | 1089 | 3.03 |
| LOC_Os01g48690.1 | ribosomal protein rpS20, putative, expressed                                      | Chr1  | 27922230 | 27924368 + | 3  | 1128 | 3.03 |
| LOC_Os06g37020.1 | expressed protein                                                                 | Chr6  | 21841186 | 21842474 + | 1  | 1321 | 3.03 |
| LOC_Os01g37570.1 | retrotransposon protein, putative, Ty3-gypsy subclass                             | Chr1  | 21003608 | 21005963 - | 3  | 1464 | 3.03 |
| LOC_Os09g30410.1 | expressed protein                                                                 | Chr9  | 18508370 | 18510789 - | 6  | 1511 | 3.03 |
| LOC_Os08g26270.1 | expressed protein                                                                 | Chr8  | 16015231 | 16015586 - | 2  | 328  | 3.04 |
| LOC_Os05g02690.1 | sensitivity to red light reduced protein 1, putative, expressed                   | Chr5  | 956022   | 957051 +   | 1  | 1062 | 3.04 |
| LOC_Os07g26750.1 | expressed protein                                                                 | Chr7  | 15451950 | 15452504 - | 1  | 587  | 3.04 |
| LOC_Os06g28890.1 | expressed protein                                                                 | Chr6  | 16481194 | 16485465 + | 2  | 766  | 3.04 |
| LOC_Os11g40630.1 | expressed protein                                                                 | Chr11 | 24250391 | 24252445 + | 4  | 965  | 3.04 |

|                       |                                                                                               |       |          |            |    |      |      |
|-----------------------|-----------------------------------------------------------------------------------------------|-------|----------|------------|----|------|------|
| LOC_Os03g50570.1      | expressed protein                                                                             | Chr3  | 28875574 | 28880854 + | 7  | 938  | 3.04 |
| LOC_Os05g23650.1      | expressed protein                                                                             | Chr5  | 13565502 | 13566559 - | 2  | 1011 | 3.04 |
| LOC_Os03g29250.1      | SPX domain-containing protein, putative, expressed                                            | Chr3  | 16645316 | 16646422 + | 2  | 1082 | 3.04 |
| LOC_Os07g42730.1      | EF hand family protein, expressed                                                             | Chr7  | 25585028 | 25586234 + | 1  | 1239 | 3.04 |
| LOC_Os06g01620.1      | scarecrow, putative, expressed                                                                | Chr6  | 365301   | 367066 +   | 1  | 1798 | 3.04 |
| LOC_Os03g11980.1      | beta-hexosaminidase precursor, putative, expressed                                            | Chr3  | 6280174  | 6282712 -  | 2  | 2498 | 3.04 |
| LOC_Os03g48840.4      | ribosomal L18p/L5e family protein, putative, expressed                                        | Chr3  | 27823064 | 27825718 + | 2  | 682  | 3.04 |
| LOC_Os03g48840.3      | ribosomal L18p/L5e family protein, putative, expressed                                        | Chr3  | 27823047 | 27825718 + | 2  | 735  | 3.04 |
| LOC_Os04g35660.1      | no apical meristem protein, putative, expressed                                               | Chr4  | 21733623 | 21734709 + | 3  | 994  | 3.04 |
| LOC_Os03g04610.1      | expressed protein                                                                             | Chr3  | 2154645  | 2155719 +  | 1  | 1107 | 3.04 |
| LOC_Os05g18500.1      | retrotransposon protein, putative, Ty3-gypsy subclass, expressed                              | Chr5  | 10694055 | 10697966 - | 4  | 1328 | 3.04 |
| LOC_Os06g13560.4      | SAM dependent carboxyl methyltransferase, putative, expressed                                 | Chr6  | 7480067  | 7482195 -  | 5  | 1498 | 3.04 |
| LOC_Os12g38550.1      | expressed protein                                                                             | Chr12 | 23670116 | 23673048 + | 4  | 1538 | 3.04 |
| LOC_Os06g13560.2      | SAM dependent carboxyl methyltransferase, putative, expressed                                 | Chr6  | 7480067  | 7482194 -  | 4  | 1651 | 3.04 |
| LOC_Os02g41954.1      | gibberellin 2-beta-dioxygenase 7, putative, expressed                                         | Chr2  | 25199386 | 25203742 - | 3  | 1653 | 3.04 |
| LOC_Os06g13560.1      | SAM dependent carboxyl methyltransferase, putative, expressed                                 | Chr6  | 7480067  | 7482194 -  | 4  | 1657 | 3.04 |
| LOC_Os06g13560.5      | SAM dependent carboxyl methyltransferase, putative, expressed                                 | Chr6  | 7480067  | 7482194 -  | 3  | 1733 | 3.04 |
| LOC_Os06g13560.3      | SAM dependent carboxyl methyltransferase, putative, expressed                                 | Chr6  | 7480067  | 7482254 -  | 3  | 1831 | 3.04 |
| LOC_Os03g63270.1      | regulatory protein, putative, expressed                                                       | Chr3  | 35753292 | 35758055 + | 3  | 2072 | 3.04 |
| LOC_Os11g14240.1      | expressed protein                                                                             | Chr11 | 7970508  | 7972670 -  | 1  | 2195 | 3.04 |
| LOC_Os04g33120.1      | retrotransposon protein, putative, unclassified, expressed                                    | Chr4  | 20049754 | 20053517 - | 5  | 2965 | 3.04 |
| LOC_Os09g15350.1      | expressed protein                                                                             | Chr9  | 9385278  | 9387636 +  | 4  | 861  | 3.04 |
| LOC_Os01g71262.1      | expressed protein                                                                             | Chr1  | 41236330 | 41238799 - | 3  | 1051 | 3.04 |
| LOC_Os01g12230.1      | peptidase C45, acyl-coenzyme A/6-aminopenicillanic acid acyl-transferase, putative, expressed | Chr1  | 6667854  | 6670442 -  | 6  | 1116 | 3.04 |
| LOC_Os03g15220.1      | DUF292 domain containing protein, expressed                                                   | Chr3  | 8327284  | 8328581 -  | 4  | 1145 | 3.04 |
| LOC_Os04g08330.1      | expressed protein                                                                             | Chr4  | 4446649  | 4446960 -  | 2  | 277  | 3.04 |
| LOC_Os01g13285.1      | expressed protein                                                                             | Chr1  | 7414865  | 7415354 -  | 2  | 474  | 3.04 |
| ChrSy.fgenesh.mRNA.75 | expressed protein                                                                             | ChrSy | 515404   | 517303 -   | 3  | 549  | 3.04 |
| LOC_Os10g05000.1      | OsFBX366 - F-box domain containing protein, expressed                                         | Chr10 | 2438829  | 2440258 +  | 2  | 914  | 3.04 |
| LOC_Os02g25680.1      | expressed protein                                                                             | Chr2  | 15033342 | 15034495 - | 3  | 1091 | 3.04 |
| LOC_Os11g30370.1      | OsSPL19 - SBP-box gene family member, expressed                                               | Chr11 | 17631609 | 17641511 - | 4  | 1454 | 3.04 |
| LOC_Os09g37430.1      | OsSAUR48 - Auxin-responsive SAUR gene family member, expressed                                | Chr9  | 21594332 | 21595017 + | 3  | 570  | 3.05 |
| LOC_Os08g42120.1      | transposon protein, putative, unclassified, expressed                                         | Chr8  | 26613290 | 26619060 - | 9  | 4665 | 3.05 |
| LOC_Os08g13420.1      | S-domain receptor-like protein kinase, putative, expressed                                    | Chr8  | 7982559  | 7985538 +  | 3  | 2610 | 3.05 |
| LOC_Os12g02820.1      | cytidyltransferase domain containing protein, expressed                                       | Chr12 | 1005447  | 1011142 -  | 9  | 2355 | 3.05 |
| LOC_Os07g47194.3      | GEX1, putative, expressed                                                                     | Chr7  | 28210040 | 28213945 - | 6  | 3192 | 3.06 |
| LOC_Os07g47194.1      | GEX1, putative, expressed                                                                     | Chr7  | 28210040 | 28213920 - | 7  | 2866 | 3.06 |
| LOC_Os04g34140.1      | U-box protein CMPG1, putative, expressed                                                      | Chr4  | 20690854 | 20692626 + | 1  | 1805 | 3.06 |
| LOC_Os11g07970.1      | OsFBW2 - F-box domain and WD40 repeat containing protein, expressed                           | Chr11 | 4134329  | 4140479 -  | 9  | 2121 | 3.06 |
| LOC_Os04g16459.1      | retrotransposon protein, putative, unclassified, expressed                                    | Chr4  | 8951060  | 8953206 -  | 2  | 1870 | 3.06 |
| LOC_Os08g32660.2      | expressed protein                                                                             | Chr8  | 20223726 | 20226599 + | 3  | 1320 | 3.06 |
| LOC_Os10g03780.1      | OsFBX351 - F-box domain containing protein, expressed                                         | Chr10 | 1707818  | 1715027 -  | 10 | 3468 | 3.06 |
| LOC_Os01g39920.1      | retrotransposon protein, putative, Ty3-gypsy subclass                                         | Chr1  | 22512220 | 22513020 + | 1  | 833  | 3.07 |
| LOC_Os05g07740.1      | receptor-like protein kinase 2 precursor, putative, expressed                                 | Chr5  | 4172714  | 4176808 +  | 2  | 4029 | 3.07 |
| LOC_Os03g51260.1      | expressed protein                                                                             | Chr3  | 29323875 | 29326368 + | 3  | 1621 | 3.07 |

|                        |                                                                        |       |          |            |    |      |      |
|------------------------|------------------------------------------------------------------------|-------|----------|------------|----|------|------|
| LOC_Os09g25310.1       | 26S proteasome non-ATPase regulatory subunit 9, putative, expressed    | Chr9  | 15153762 | 15157002 - | 5  | 1284 | 3.07 |
| LOC_Os03g01540.1       | DNA binding protein, putative, expressed                               | Chr3  | 344307   | 347004 -   | 5  | 1501 | 3.08 |
| LOC_Os10g40590.1       | oxysterol-binding protein, putative, expressed                         | Chr10 | 21749421 | 21754862 + | 10 | 3165 | 3.08 |
| LOC_Os10g05730.1       | armadillo/beta-catenin repeat family protein, putative, expressed      | Chr10 | 2885293  | 2889777 -  | 2  | 2863 | 3.09 |
| LOC_Os10g13810.1       | glycosyltransferase family 43 protein, putative, expressed             | Chr10 | 7499315  | 7503453 -  | 4  | 1903 | 3.09 |
| LOC_Os01g55770.1       | expressed protein                                                      | Chr1  | 32123247 | 32128053 - | 2  | 915  | 3.10 |
| LOC_Os11g35610.1       | hypothetical protein                                                   | Chr11 | 20884500 | 20884860 + | 2  | 253  | 3.10 |
| LOC_Os01g10000.1       | expressed protein                                                      | Chr1  | 5210468  | 5213292 -  | 3  | 489  | 3.10 |
| LOC_Os01g68890.1       | P21-Rho-binding domain containing protein, putative, expressed         | Chr1  | 40030104 | 40031429 - | 2  | 1279 | 3.10 |
| LOC_Os05g01330.1       | expressed protein                                                      | Chr5  | 207853   | 209693 -   | 3  | 654  | 3.10 |
| LOC_Os03g55720.1       | cytochrome b6f complex subunit, putative, expressed                    | Chr3  | 31725167 | 31725900 + | 1  | 766  | 3.10 |
| LOC_Os03g55720.2       | cytochrome b6f complex subunit, putative, expressed                    | Chr3  | 31725102 | 31725900 + | 2  | 780  | 3.10 |
| LOC_Os01g53910.1       | dehydrogenase, putative, expressed                                     | Chr1  | 30997985 | 30999454 - | 1  | 1502 | 3.10 |
| LOC_Os02g41800.1       | auxin response factor, putative, expressed                             | Chr2  | 25133442 | 25136111 + | 3  | 2537 | 3.10 |
| LOC_Os02g41800.2       | auxin response factor, putative, expressed                             | Chr2  | 25133442 | 25136111 + | 2  | 2654 | 3.10 |
| LOC_Os06g10740.1       | transposon protein, putative, unclassified, expressed                  | Chr6  | 5608404  | 5611437 +  | 4  | 2780 | 3.10 |
| LOC_Os01g47470.1       | serine/threonine-protein kinase, putative, expressed                   | Chr1  | 27130541 | 27134194 - | 8  | 2657 | 3.11 |
| LOC_Os06g50970.1       | expressed protein                                                      | Chr6  | 30848411 | 30850264 + | 4  | 350  | 3.11 |
| LOC_Os09g10201.1       | expressed protein                                                      | Chr9  | 5555449  | 5556367 -  | 1  | 951  | 3.11 |
| LOC_Os05g48810.1       | dnal domain containing protein, expressed                              | Chr5  | 27972291 | 27974607 - | 3  | 1720 | 3.11 |
| LOC_Os03g57190.1       | TCP family transcription factor, putative, expressed                   | Chr3  | 32614060 | 32618299 + | 2  | 1921 | 3.11 |
| LOC_Os08g10604.1       | pectinesterase, putative, expressed                                    | Chr8  | 6242159  | 6243723 -  | 5  | 1410 | 3.11 |
| LOC_Os12g03440.1       | OsFBX436 - F-box domain containing protein, expressed                  | Chr12 | 1342002  | 1344257 +  | 3  | 1813 | 3.11 |
| LOC_Os08g18780.1       | retrotransposon protein, putative, unclassified, expressed             | Chr8  | 11208040 | 11209881 + | 1  | 1874 | 3.11 |
| LOC_Os08g18840.1       | retrotransposon protein, putative, unclassified, expressed             | Chr8  | 11243813 | 11246472 + | 2  | 2248 | 3.11 |
| LOC_Os06g19380.1       | expressed protein                                                      | Chr6  | 11030395 | 11034088 - | 3  | 2466 | 3.11 |
| LOC_Os05g14040.1       | G-patch domain containing protein, expressed                           | Chr5  | 7849847  | 7850262 -  | 2  | 277  | 3.11 |
| LOC_Os12g40390.1       | expressed protein                                                      | Chr12 | 25004455 | 25007073 - | 5  | 928  | 3.11 |
| LOC_Os03g55890.1       | ternary complex factor MIP1, putative, expressed                       | Chr3  | 31825506 | 31829685 - | 12 | 2835 | 3.11 |
| LOC_Os10g19300.1       | expressed protein                                                      | Chr10 | 9828339  | 9831732 +  | 4  | 791  | 3.11 |
| LOC_Os02g25680.2       | expressed protein                                                      | Chr2  | 15029459 | 15034532 - | 3  | 1192 | 3.11 |
| LOC_Os02g37960.1       | expressed protein                                                      | Chr2  | 22941281 | 22943116 + | 1  | 1868 | 3.11 |
| LOC_Os12g30230.1       | retrotransposon protein, putative, unclassified                        | Chr12 | 18141506 | 18142836 + | 2  | 352  | 3.11 |
| LOC_Os10g35820.1       | expressed protein                                                      | Chr10 | 19152303 | 19152971 + | 1  | 701  | 3.11 |
| LOC_Os04g38880.1       | dynein light chain type 1 domain containing protein, expressed         | Chr4  | 23108124 | 23110736 - | 2  | 1171 | 3.11 |
| ChrSy.fgenes.h.mRNA.26 | expressed protein                                                      | ChrSy | 167442   | 168924 +   | 4  | 722  | 3.12 |
| LOC_Os12g38510.1       | GRF zinc finger family protein                                         | Chr12 | 23650623 | 23651467 + | 3  | 777  | 3.12 |
| LOC_Os01g74500.1       | expressed protein                                                      | Chr1  | 43143717 | 43146789 + | 11 | 1225 | 3.12 |
| LOC_Os01g74550.1       | transposon protein, putative, unclassified, expressed                  | Chr1  | 43175447 | 43179007 - | 6  | 3060 | 3.12 |
| LOC_Os01g16330.1       | OsRhmbd2 - Putative Rhomboid homologue, expressed                      | Chr1  | 9259137  | 9264342 +  | 8  | 1912 | 3.12 |
| LOC_Os06g12030.2       | glutaredoxin domain containing protein, putative, expressed            | Chr6  | 6440428  | 6447606 -  | 7  | 2906 | 3.13 |
| LOC_Os06g12030.1       | glutaredoxin domain containing protein, putative, expressed            | Chr6  | 6440413  | 6447606 -  | 7  | 2887 | 3.13 |
| LOC_Os02g57220.1       | WD domain, G-beta repeat domain containing protein, expressed          | Chr2  | 35056930 | 35062529 - | 15 | 2095 | 3.14 |
| LOC_Os02g55250.1       | BHLH transcription factor, putative, expressed                         | Chr2  | 33833909 | 33838048 + | 8  | 1648 | 3.14 |
| LOC_Os07g31130.1       | OsWAK72 - OsWAK receptor-like cytoplasmic kinase OsWAK-RLCK, expressed | Chr7  | 18416297 | 18420420 + | 3  | 2924 | 3.15 |

|                  |                                                                                  |       |          |            |    |      |      |
|------------------|----------------------------------------------------------------------------------|-------|----------|------------|----|------|------|
| LOC_Os05g32420.1 | expressed protein                                                                | Chr5  | 18919319 | 18920501 + | 1  | 1215 | 3.15 |
| LOC_Os08g06510.1 | zinc finger, C3HC4 type domain containing protein, expressed                     | Chr8  | 3686054  | 3688009 -  | 1  | 1988 | 3.16 |
| LOC_Os12g37530.2 | expressed protein                                                                | Chr12 | 23030653 | 23035532 - | 13 | 3315 | 3.16 |
| LOC_Os03g55730.3 | SSA2 - 2S albumin seed storage family protein precursor, putative, expressed     | Chr3  | 31728025 | 31732265 - | 4  | 743  | 3.16 |
| LOC_Os07g40230.1 | expressed protein                                                                | Chr7  | 24122021 | 24122503 - | 1  | 515  | 3.17 |
| LOC_Os03g25490.1 | cytochrome P450 72A1, putative, expressed                                        | Chr3  | 14559322 | 14561845 + | 5  | 1906 | 3.17 |
| LOC_Os03g25490.2 | cytochrome P450 72A1, putative, expressed                                        | Chr3  | 14559322 | 14561845 + | 5  | 1911 | 3.17 |
| LOC_Os05g35610.1 | hypothetical protein                                                             | Chr5  | 21158434 | 21159251 - | 2  | 397  | 3.17 |
| LOC_Os05g32990.1 | expressed protein                                                                | Chr5  | 19336656 | 19337633 - | 2  | 631  | 3.17 |
| LOC_Os03g44520.1 | expressed protein                                                                | Chr3  | 25061417 | 25062374 + | 1  | 990  | 3.17 |
| LOC_Os02g38029.1 | expressed protein                                                                | Chr2  | 22975504 | 22976636 - | 2  | 1078 | 3.17 |
| LOC_Os11g03240.1 | MATE efflux family protein, putative, expressed                                  | Chr11 | 1186104  | 1189696 +  | 8  | 1999 | 3.17 |
| LOC_Os02g33460.1 | transposon protein, putative, Mutator sub-class, expressed                       | Chr2  | 19895310 | 19899106 + | 3  | 2963 | 3.17 |
| LOC_Os06g17410.1 | dof zinc finger domain containing protein, putative, expressed                   | Chr6  | 10101312 | 10102739 + | 1  | 1460 | 3.17 |
| LOC_Os04g30320.1 | F-box/LRR-repeat protein 14, putative, expressed                                 | Chr4  | 18096179 | 18098734 + | 2  | 1913 | 3.17 |
| LOC_Os01g41740.1 | expressed protein                                                                | Chr1  | 23630444 | 23631237 + | 2  | 709  | 3.17 |
| LOC_Os06g08510.1 | expressed protein                                                                | Chr6  | 4201213  | 4202867 -  | 2  | 782  | 3.17 |
| LOC_Os06g25110.1 | retrotransposon protein, putative, Ty3-gypsy subclass, expressed                 | Chr6  | 14694467 | 14697918 + | 2  | 2746 | 3.17 |
| LOC_Os12g01780.1 | retrotransposon protein, putative, Ty1-copia subclass, expressed                 | Chr12 | 473751   | 477819 -   | 5  | 3631 | 3.17 |
| LOC_Os03g32170.1 | NAD dependent epimerase/dehydratase family protein, putative, expressed          | Chr3  | 18404980 | 18406843 - | 1  | 1896 | 3.17 |
| LOC_Os05g25600.1 | transposon protein, putative, unclassified, expressed                            | Chr5  | 14879436 | 14886369 + | 10 | 2695 | 3.17 |
| LOC_Os04g45280.5 | histidine triad family protein, putative, expressed                              | Chr4  | 26752194 | 26757287 - | 6  | 1205 | 3.18 |
| LOC_Os03g17100.1 | Core histone H2A/H2B/H3/H4 domain containing protein, putative, expressed        | Chr3  | 9498900  | 9499826 -  | 2  | 890  | 3.18 |
| LOC_Os12g26770.1 | retrotransposon protein, putative, Ty3-gypsy subclass, expressed                 | Chr12 | 15685076 | 15687320 + | 3  | 1005 | 3.18 |
| LOC_Os01g70930.1 | leucoanthocyanidin dioxygenase, putative, expressed                              | Chr1  | 41057016 | 41058872 - | 3  | 1529 | 3.18 |
| LOC_Os04g49230.1 | B3 DNA binding domain containing protein, expressed                              | Chr4  | 29366456 | 29368515 - | 1  | 2092 | 3.18 |
| LOC_Os12g18200.1 | endonuclease/exonuclease/phosphatase family domain containing protein, expressed | Chr12 | 10506833 | 10515806 - | 9  | 1809 | 3.18 |
| LOC_Os10g07420.1 | expressed protein                                                                | Chr10 | 3926310  | 3926756 -  | 1  | 479  | 3.18 |
| LOC_Os07g26700.1 | UPF0041 domain containing protein, putative, expressed                           | Chr7  | 15421670 | 15425213 - | 6  | 1280 | 3.18 |
| LOC_Os08g23670.1 | expressed protein                                                                | Chr8  | 14319699 | 14320501 - | 3  | 369  | 3.18 |
| LOC_Os10g01560.1 | serine/threonine-protein kinase, putative, expressed                             | Chr10 | 372226   | 375691 -   | 2  | 2470 | 3.18 |
| LOC_Os08g19830.3 | ubiquitin family protein, putative, expressed                                    | Chr8  | 11869980 | 11879530 - | 15 | 2662 | 3.18 |
| LOC_Os02g47310.1 | Cyclopropane-fatty-acyl-phospholipid synthase, putative, expressed               | Chr2  | 28893961 | 28897548 + | 6  | 1727 | 3.19 |
| LOC_Os12g18050.1 | retrotransposon protein, putative, unclassified                                  | Chr12 | 10377464 | 10380258 - | 2  | 1390 | 3.20 |
| LOC_Os07g31500.1 | leucine-rich repeat receptor protein kinase EXS precursor, putative, expressed   | Chr7  | 18688114 | 18692305 - | 2  | 4167 | 3.20 |
| LOC_Os05g25040.2 | expressed protein                                                                | Chr5  | 14489395 | 14494422 - | 4  | 1944 | 3.20 |
| LOC_Os07g09150.1 | expressed protein                                                                | Chr7  | 4774603  | 4776611 -  | 2  | 1473 | 3.20 |
| LOC_Os11g05300.1 | RING-H2 finger protein, putative, expressed                                      | Chr11 | 2345511  | 2348240 -  | 2  | 1169 | 3.21 |
| LOC_Os06g07878.1 | peptidase, T1 family, putative, expressed                                        | Chr6  | 3832012  | 3833595 +  | 1  | 1616 | 3.21 |
| LOC_Os06g27910.1 | oleosin, putative, expressed                                                     | Chr6  | 15840814 | 15842660 + | 3  | 1754 | 3.22 |
| LOC_Os02g56390.1 | transposon protein, putative, unclassified, expressed                            | Chr2  | 34521702 | 34527680 + | 11 | 5167 | 3.22 |
| LOC_Os09g35720.1 | generative cell specific-1, putative, expressed                                  | Chr9  | 20541751 | 20548192 - | 17 | 2942 | 3.22 |
| LOC_Os08g41430.1 | LRR receptor kinase, putative, expressed                                         | Chr8  | 26159872 | 26161589 + | 2  | 601  | 3.23 |
| LOC_Os09g03490.1 | carboxylic ester hydrolase, putative, expressed                                  | Chr9  | 1721391  | 1722404 +  | 3  | 495  | 3.23 |
| LOC_Os04g44650.1 | ferredoxin-thioredoxin reductase, variable chain, putative, expressed            | Chr4  | 26431378 | 26432248 - | 1  | 903  | 3.23 |



|                  |                                                                                  |       |          |            |    |      |      |
|------------------|----------------------------------------------------------------------------------|-------|----------|------------|----|------|------|
| LOC_Os09g22040.1 | expressed protein                                                                | Chr9  | 13352012 | 13354251 + | 5  | 898  | 3.23 |
| LOC_Os11g38500.1 | OsFBDUF62 - F-box and DUF domain containing protein, expressed                   | Chr11 | 22816581 | 22817823 - | 3  | 1077 | 3.23 |
| LOC_Os11g10400.2 | OsFBX419 - F-box domain containing protein, expressed                            | Chr11 | 5646730  | 5648416 -  | 3  | 1567 | 3.23 |
| LOC_Os11g38250.1 | expressed protein                                                                | Chr11 | 22658414 | 22660215 - | 2  | 1706 | 3.23 |
| LOC_Os06g10660.1 | lysM domain-containing GPI-anchored protein 1 precursor, putative, expressed     | Chr6  | 5559909  | 5563097 +  | 5  | 1752 | 3.23 |
| LOC_Os05g01256.1 | helix-loop-helix DNA-binding domain containing protein, expressed                | Chr5  | 178801   | 181635 -   | 7  | 1887 | 3.23 |
| LOC_Os05g01256.2 | helix-loop-helix DNA-binding domain containing protein, expressed                | Chr5  | 178801   | 181619 -   | 7  | 1908 | 3.23 |
| LOC_Os09g04410.1 | retrotransposon, putative, centromere-specific, expressed                        | Chr9  | 2332692  | 2335237 +  | 2  | 1909 | 3.23 |
| LOC_Os05g43680.1 | expressed protein                                                                | Chr5  | 25392863 | 25396054 - | 6  | 915  | 3.23 |
| LOC_Os06g02410.1 | expressed protein                                                                | Chr6  | 828716   | 830761 -   | 3  | 1257 | 3.23 |
| LOC_Os09g24210.1 | expressed protein                                                                | Chr9  | 14368032 | 14373669 - | 7  | 2774 | 3.23 |
| LOC_Os08g19830.1 | ubiquitin family protein, putative, expressed                                    | Chr8  | 11869980 | 11879530 - | 16 | 3084 | 3.23 |
| LOC_Os03g26820.1 | LTP152 - Protease inhibitor/seed storage/LTP family protein precursor, expressed | Chr3  | 15307615 | 15309815 + | 2  | 976  | 3.23 |
| LOC_Os12g14610.1 | cysteine-rich receptor-like protein kinase 32 precursor, putative, expressed     | Chr12 | 8341487  | 8347833 -  | 7  | 1682 | 3.23 |
| LOC_Os05g12170.2 | plant-specific domain TIGR01589 family protein, putative, expressed              | Chr5  | 6957379  | 6964189 -  | 9  | 1865 | 3.23 |
| LOC_Os05g12170.5 | plant-specific domain TIGR01589 family protein, putative, expressed              | Chr5  | 6957379  | 6964192 -  | 9  | 1878 | 3.23 |
| LOC_Os05g12170.1 | plant-specific domain TIGR01589 family protein, putative, expressed              | Chr5  | 6957379  | 6964192 -  | 9  | 1896 | 3.23 |
| LOC_Os10g20510.3 | expressed protein                                                                | Chr10 | 10337377 | 10339305 + | 1  | 1961 | 3.23 |
| LOC_Os02g18150.1 | expressed protein                                                                | Chr2  | 10540688 | 10543155 - | 1  | 2500 | 3.23 |
| LOC_Os05g12170.4 | plant-specific domain TIGR01589 family protein, putative, expressed              | Chr5  | 6957379  | 6964189 -  | 9  | 2792 | 3.23 |
| LOC_Os03g19080.2 | expressed protein                                                                | Chr3  | 10684315 | 10688955 + | 6  | 3525 | 3.23 |
| LOC_Os03g19080.1 | expressed protein                                                                | Chr3  | 10684315 | 10688955 + | 6  | 3630 | 3.23 |
| LOC_Os03g19080.3 | expressed protein                                                                | Chr3  | 10684315 | 10688955 + | 6  | 3639 | 3.23 |
| LOC_Os03g46730.3 | expressed protein                                                                | Chr3  | 26442733 | 26444293 + | 2  | 793  | 3.24 |
| LOC_Os07g05040.1 | cadmium-induced protein, putative, expressed                                     | Chr7  | 2222928  | 2224916 -  | 3  | 1078 | 3.24 |
| LOC_Os07g34570.1 | FAD dependent oxidoreductase domain containing protein, expressed                | Chr7  | 20724563 | 20726098 + | 2  | 1522 | 3.24 |
| LOC_Os07g34570.2 | FAD dependent oxidoreductase domain containing protein, expressed                | Chr7  | 20724563 | 20726085 + | 1  | 1555 | 3.24 |
| LOC_Os02g45850.1 | B3 DNA binding domain containing protein, expressed                              | Chr2  | 27932831 | 27934689 - | 1  | 1891 | 3.24 |
| LOC_Os09g20500.1 | transporter, putative, expressed                                                 | Chr9  | 12360645 | 12363883 + | 3  | 2028 | 3.24 |
| LOC_Os03g49830.1 | expressed protein                                                                | Chr3  | 28390076 | 28392181 + | 2  | 2030 | 3.24 |
| LOC_Os10g42480.1 | retrotransposon protein, putative, unclassified, expressed                       | Chr10 | 22900599 | 22903922 - | 7  | 2141 | 3.24 |
| LOC_Os03g14600.1 | transposon protein, putative, unclassified, expressed                            | Chr3  | 7924942  | 7927975 +  | 4  | 2780 | 3.24 |
| LOC_Os11g19420.1 | retrotransposon protein, putative, Ty3-gypsy subclass, expressed                 | Chr11 | 11163585 | 11168111 + | 4  | 4358 | 3.24 |
| LOC_Os05g20500.1 | retrotransposon protein, putative, Ty3-gypsy subclass, expressed                 | Chr5  | 12032084 | 12032785 - | 1  | 734  | 3.24 |
| LOC_Os01g12440.1 | AP2 domain containing protein, expressed                                         | Chr1  | 6813714  | 6815546 +  | 1  | 1865 | 3.24 |
| LOC_Os06g29800.1 | pentatricopeptide, putative, expressed                                           | Chr6  | 17142218 | 17144442 - | 1  | 2257 | 3.24 |
| LOC_Os03g52550.1 | retrotransposon protein, putative, unclassified, expressed                       | Chr3  | 30145383 | 30148308 - | 8  | 2419 | 3.24 |
| LOC_Os07g22400.1 | POLA3 - Putative DNA polymerase alpha complex subunit, expressed                 | Chr7  | 12574580 | 12579665 - | 20 | 2581 | 3.24 |
| LOC_Os07g09384.1 | expressed protein                                                                | Chr7  | 4940554  | 4944598 +  | 3  | 3445 | 3.24 |
| LOC_Os07g38150.1 | expressed protein                                                                | Chr7  | 22880416 | 22882065 - | 2  | 775  | 3.24 |
| LOC_Os01g51850.1 | expressed protein                                                                | Chr1  | 29810802 | 29812468 - | 4  | 1044 | 3.24 |
| LOC_Os05g11700.1 | PPR repeat containing protein, expressed                                         | Chr5  | 6647138  | 6648325 +  | 1  | 1220 | 3.24 |
| LOC_Os02g20490.1 | expressed protein                                                                | Chr2  | 12086017 | 12089352 + | 4  | 1447 | 3.24 |
| LOC_Os02g47620.3 | hydrolase, alpha/beta fold family domain containing protein, expressed           | Chr2  | 29098995 | 29101290 - | 5  | 1713 | 3.24 |
| LOC_Os02g47620.1 | hydrolase, alpha/beta fold family domain containing protein, expressed           | Chr2  | 29098995 | 29101290 - | 4  | 1775 | 3.24 |

|                  |                                                                                  |       |          |            |    |       |      |
|------------------|----------------------------------------------------------------------------------|-------|----------|------------|----|-------|------|
| LOC_Os02g47620.2 | hydrolase, alpha/beta fold family domain containing protein, expressed           | Chr2  | 29098995 | 29101290 - | 4  | 1777  | 3.24 |
| LOC_Os02g29210.2 | ankyrin, putative, expressed                                                     | Chr2  | 17327592 | 17335614 - | 10 | 1920  | 3.24 |
| LOC_Os02g29210.4 | ankyrin, putative, expressed                                                     | Chr2  | 17327592 | 17335614 - | 10 | 1923  | 3.24 |
| LOC_Os02g29210.1 | ankyrin, putative, expressed                                                     | Chr2  | 17327565 | 17335614 - | 10 | 1994  | 3.24 |
| LOC_Os03g08170.1 | protein kinase APK1B, chloroplast precursor, putative, expressed                 | Chr3  | 4173178  | 4179255 +  | 5  | 2167  | 3.24 |
| LOC_Os05g02850.1 | retrotransposon protein, putative, unclassified, expressed                       | Chr5  | 1030725  | 1033586 +  | 8  | 2260  | 3.24 |
| LOC_Os02g29210.3 | ankyrin, putative, expressed                                                     | Chr2  | 17327592 | 17335593 - | 9  | 2514  | 3.24 |
| LOC_Os07g26940.3 | ORM1, putative, expressed                                                        | Chr7  | 15602020 | 15604578 - | 2  | 877   | 3.24 |
| LOC_Os03g58020.1 | acetyltransferase, GNAT family, putative, expressed                              | Chr3  | 33036315 | 33037134 + | 1  | 852   | 3.24 |
| LOC_Os11g14070.1 | expressed protein                                                                | Chr11 | 7817973  | 7824131 -  | 3  | 1451  | 3.24 |
| LOC_Os02g22260.1 | fruit protein PKIW1502, putative, expressed                                      | Chr2  | 13280849 | 13292533 + | 5  | 1484  | 3.24 |
| LOC_Os04g21880.1 | expressed protein                                                                | Chr4  | 12392697 | 12394876 + | 6  | 1635  | 3.24 |
| LOC_Os02g09650.1 | AP2 domain containing protein, expressed                                         | Chr2  | 4958350  | 4959662 -  | 1  | 1345  | 3.24 |
| LOC_Os11g06800.1 | retrotransposon protein, putative, unclassified, expressed                       | Chr11 | 3330523  | 3331395 +  | 2  | 775   | 3.24 |
| LOC_Os08g44540.1 | expressed protein                                                                | Chr8  | 28009633 | 28011691 + | 4  | 1082  | 3.24 |
| LOC_Os04g45730.1 | protein kinase domain containing protein, expressed                              | Chr4  | 27058376 | 27060119 - | 2  | 1701  | 3.25 |
| LOC_Os05g49270.1 | transporter family protein, putative, expressed                                  | Chr5  | 28264881 | 28269493 + | 17 | 2545  | 3.26 |
| LOC_Os01g22480.2 | OsFBDUF4 - F-box and DUF domain containing protein, expressed                    | Chr1  | 12636380 | 12640675 - | 4  | 3085  | 3.27 |
| LOC_Os01g01689.1 | phosphatidylinositol 3- and 4-kinase family protein, expressed                   | Chr1  | 335809   | 370910 +   | 78 | 11232 | 3.27 |
| LOC_Os05g42030.1 | transposon protein, putative, unclassified, expressed                            | Chr5  | 24601986 | 24604931 - | 7  | 2063  | 3.28 |
| LOC_Os01g57540.1 | protein kinase, putative, expressed                                              | Chr1  | 33240486 | 33243618 + | 5  | 2028  | 3.29 |
| LOC_Os11g02850.1 | expressed protein                                                                | Chr11 | 961664   | 962843 +   | 2  | 301   | 3.29 |
| LOC_Os04g59050.1 | expressed protein                                                                | Chr4  | 35127294 | 35128016 + | 2  | 690   | 3.29 |
| LOC_Os09g02440.1 | DCL, chloroplast precursor, putative, expressed                                  | Chr9  | 1006780  | 1012534 -  | 3  | 871   | 3.29 |
| LOC_Os03g08080.1 | YGGT family protein, putative, expressed                                         | Chr3  | 4129653  | 4131193 +  | 3  | 1229  | 3.29 |
| LOC_Os02g20380.4 | expressed protein                                                                | Chr2  | 12011145 | 12015514 - | 7  | 1161  | 3.29 |
| LOC_Os07g28460.1 | transposon protein, putative, unclassified, expressed                            | Chr7  | 16650377 | 16657246 + | 7  | 1627  | 3.29 |
| LOC_Os04g51560.1 | WRKY68, expressed                                                                | Chr4  | 30545175 | 30546577 + | 3  | 1297  | 3.29 |
| LOC_Os02g40680.1 | mis12 protein, expressed                                                         | Chr2  | 24667251 | 24670792 + | 7  | 1332  | 3.29 |
| LOC_Os06g49640.1 | uncharacterized UPF0114 domain containing protein, expressed                     | Chr6  | 30035963 | 30037742 - | 4  | 1535  | 3.29 |
| LOC_Os06g49640.3 | uncharacterized UPF0114 domain containing protein, expressed                     | Chr6  | 30035844 | 30037729 - | 3  | 1694  | 3.29 |
| LOC_Os06g49640.4 | uncharacterized UPF0114 domain containing protein, expressed                     | Chr6  | 30035844 | 30037742 - | 3  | 1841  | 3.29 |
| LOC_Os06g49640.6 | uncharacterized UPF0114 domain containing protein, expressed                     | Chr6  | 30035844 | 30037742 - | 2  | 1878  | 3.29 |
| LOC_Os06g49640.5 | uncharacterized UPF0114 domain containing protein, expressed                     | Chr6  | 30035844 | 30037742 - | 2  | 1894  | 3.29 |
| LOC_Os01g55700.1 | NLI interacting factor-like phosphatase, putative, expressed                     | Chr1  | 32072449 | 32082488 - | 10 | 1829  | 3.29 |
| LOC_Os06g15630.1 | retrotransposon protein, putative, unclassified, expressed                       | Chr6  | 8854013  | 8855635 +  | 2  | 1624  | 3.29 |
| LOC_Os12g02680.1 | expressed protein                                                                | Chr12 | 935256   | 937422 +   | 3  | 654   | 3.29 |
| LOC_Os09g12310.1 | ubiquitin-conjugating enzyme domain containing protein, expressed                | Chr9  | 7017623  | 7020985 -  | 7  | 1772  | 3.29 |
| LOC_Os09g30230.1 | disease resistance protein RPM1, putative, expressed                             | Chr9  | 18402208 | 18404264 - | 2  | 1818  | 3.29 |
| LOC_Os06g01790.1 | expressed protein                                                                | Chr6  | 454856   | 457580 +   | 5  | 2119  | 3.29 |
| LOC_Os04g35640.1 | retrotransposon protein, putative, unclassified, expressed                       | Chr4  | 21716811 | 21719152 + | 2  | 2122  | 3.29 |
| LOC_Os01g08870.1 | expressed protein                                                                | Chr1  | 4453717  | 4454004 +  | 1  | 320   | 3.30 |
| LOC_Os08g42380.1 | mitochondrial import inner membrane translocase subunit Tim, putative, expressed | Chr8  | 26749936 | 26751013 - | 2  | 322   | 3.30 |
| LOC_Os07g13834.1 | expressed protein                                                                | Chr7  | 7923176  | 7923749 +  | 1  | 606   | 3.30 |
| LOC_Os05g32520.1 | conserved hypothetical protein                                                   | Chr5  | 19001474 | 19004176 - | 3  | 1758  | 3.30 |

|                  |                                                                                   |       |          |            |    |       |      |
|------------------|-----------------------------------------------------------------------------------|-------|----------|------------|----|-------|------|
| LOC_Os04g39080.1 | OsFBX140 - F-box domain containing protein, expressed                             | Chr4  | 23226180 | 23228272 - | 3  | 1804  | 3.30 |
| LOC_Os08g09370.1 | polyprenyl synthetase, putative, expressed                                        | Chr8  | 5435582  | 5439963 +  | 12 | 1932  | 3.30 |
| LOC_Os03g12414.1 | cyclin, putative, expressed                                                       | Chr3  | 6556387  | 6562025 -  | 9  | 2888  | 3.30 |
| LOC_Os03g12414.2 | cyclin, putative, expressed                                                       | Chr3  | 6556387  | 6562025 -  | 8  | 2931  | 3.30 |
| LOC_Os03g48840.2 | ribosomal L18p/L5e family protein, putative, expressed                            | Chr3  | 27823047 | 27825718 + | 4  | 1033  | 3.30 |
| LOC_Os01g65904.1 | expressed protein                                                                 | Chr1  | 38273297 | 38274818 + | 1  | 1554  | 3.30 |
| LOC_Os01g01689.3 | phosphatidylinositol 3- and 4-kinase family protein, expressed                    | Chr1  | 335809   | 371191 +   | 76 | 11458 | 3.30 |
| LOC_Os07g27650.1 | expressed protein                                                                 | Chr7  | 16145179 | 16145771 + | 2  | 565   | 3.30 |
| LOC_Os12g40150.1 | expressed protein                                                                 | Chr12 | 24826746 | 24828462 - | 4  | 647   | 3.30 |
| LOC_Os01g70830.1 | esterase PIR7A, putative, expressed                                               | Chr1  | 40999828 | 41000884 - | 4  | 803   | 3.30 |
| LOC_Os10g08879.3 | nucleotide-sensitive chloride conductance regulator containing protein, expressed | Chr10 | 4800430  | 4806890 +  | 3  | 1064  | 3.30 |
| LOC_Os09g35850.1 | RNA recognition motif containing protein, putative, expressed                     | Chr9  | 20629717 | 20633528 + | 6  | 1389  | 3.30 |
| LOC_Os03g15930.3 | OTU-like cysteine protease family protein, putative, expressed                    | Chr3  | 8790747  | 8795738 +  | 7  | 1398  | 3.30 |
| LOC_Os01g09740.1 | F-box/LRR-repeat protein, putative, expressed                                     | Chr1  | 5017893  | 5020150 -  | 2  | 1817  | 3.30 |
| LOC_Os02g15670.1 | expressed protein                                                                 | Chr2  | 8824994  | 8825380 +  | 1  | 419   | 3.30 |
| LOC_Os10g22180.1 | expressed protein                                                                 | Chr10 | 11464016 | 11465615 - | 5  | 637   | 3.30 |
| LOC_Os02g30760.1 | expressed protein                                                                 | Chr2  | 18327196 | 18327730 - | 1  | 567   | 3.30 |
| LOC_Os06g33520.1 | DEAD/DEAH box helicase, putative, expressed                                       | Chr6  | 19516630 | 19524702 - | 10 | 3782  | 3.30 |
| LOC_Os09g32500.1 | 60S ribosomal protein L32, putative, expressed                                    | Chr9  | 19398908 | 19401072 + | 4  | 933   | 3.31 |
| LOC_Os09g32500.2 | 60S ribosomal protein L32, putative, expressed                                    | Chr9  | 19398925 | 19401072 + | 4  | 921   | 3.31 |
| LOC_Os10g21212.1 | photosystem II 44 kDa reaction center protein, putative, expressed                | Chr10 | 10817033 | 10818454 + | 1  | 1454  | 3.31 |
| LOC_Os05g07120.2 | basic helix-loop-helix, putative, expressed                                       | Chr5  | 3756663  | 3759787 +  | 3  | 1103  | 3.32 |
| LOC_Os02g16630.1 | tryptophan biosynthesis protein trpCF, putative, expressed                        | Chr2  | 9502442  | 9505462 +  | 5  | 1879  | 3.32 |
| LOC_Os02g01550.1 | OsFBL6 - F-box domain and LRR containing protein, expressed                       | Chr2  | 311537   | 316458 -   | 5  | 2128  | 3.32 |
| LOC_Os02g01550.2 | OsFBL6 - F-box domain and LRR containing protein, expressed                       | Chr2  | 311537   | 316458 -   | 5  | 2122  | 3.32 |
| LOC_Os06g25890.1 | retrotransposon protein, putative, unclassified, expressed                        | Chr6  | 15138072 | 15143579 + | 3  | 4800  | 3.32 |
| LOC_Os01g16510.1 | expressed protein                                                                 | Chr1  | 9370599  | 9373674 +  | 5  | 1361  | 3.32 |
| LOC_Os08g18740.1 | zinc knuckle family protein, expressed                                            | Chr8  | 11187663 | 11192957 + | 2  | 5086  | 3.32 |
| LOC_Os11g17260.1 | retrotransposon protein, putative, Ty3-gypsy subclass                             | Chr11 | 9614428  | 9617361 +  | 2  | 2152  | 3.32 |
| LOC_Os05g37970.1 | universal stress protein domain containing protein, putative, expressed           | Chr5  | 22276282 | 22278729 + | 3  | 2354  | 3.33 |
| LOC_Os01g03020.1 | tRNA synthetase class I, putative, expressed                                      | Chr1  | 1145829  | 1155094 -  | 20 | 3765  | 3.33 |
| LOC_Os01g18210.1 | peptidyl-prolyl cis-trans isomerase, putative, expressed                          | Chr1  | 10193643 | 10196775 + | 6  | 1359  | 3.34 |
| LOC_Os03g14450.1 | enolase, putative, expressed                                                      | Chr3  | 7847992  | 7852823 -  | 17 | 2357  | 3.34 |
| LOC_Os11g04980.2 | acyl-CoA synthetase protein, putative, expressed                                  | Chr11 | 2131895  | 2141398 -  | 23 | 3518  | 3.34 |
| LOC_Os11g04980.1 | acyl-CoA synthetase protein, putative, expressed                                  | Chr11 | 2131895  | 2141398 -  | 23 | 3524  | 3.34 |
| LOC_Os05g28370.2 | expressed protein                                                                 | Chr5  | 16622072 | 16625788 - | 4  | 1541  | 3.35 |
| LOC_Os02g02010.1 | expressed protein                                                                 | Chr2  | 558915   | 559965 +   | 3  | 660   | 3.35 |
| LOC_Os02g03430.1 | expressed protein                                                                 | Chr2  | 1397688  | 1399034 +  | 4  | 907   | 3.35 |
| LOC_Os07g09590.1 | bHLH transcription factor, putative, expressed                                    | Chr7  | 5082119  | 5084790 -  | 6  | 963   | 3.35 |
| LOC_Os05g51440.1 | hsp20/alpha crystallin family protein, putative, expressed                        | Chr5  | 29494574 | 29495716 + | 2  | 1059  | 3.35 |
| LOC_Os09g34030.1 | expressed protein                                                                 | Chr9  | 20084418 | 20084895 + | 2  | 286   | 3.35 |
| LOC_Os06g47940.1 | nifU, putative, expressed                                                         | Chr6  | 28993796 | 28995033 + | 4  | 1047  | 3.35 |
| LOC_Os03g05410.1 | expressed protein                                                                 | Chr3  | 2667501  | 2669000 -  | 2  | 1483  | 3.35 |
| LOC_Os05g50170.2 | ATPCME, putative, expressed                                                       | Chr5  | 28746904 | 28751809 - | 12 | 1994  | 3.35 |
| LOC_Os03g01014.1 | expressed protein                                                                 | Chr3  | 13193    | 16729 +    | 9  | 2298  | 3.35 |

|                  |                                                                              |       |          |            |    |      |      |
|------------------|------------------------------------------------------------------------------|-------|----------|------------|----|------|------|
| LOC_Os09g36040.1 | rhodanese-like domain containing protein, putative, expressed                | Chr9  | 20751729 | 20754649 + | 6  | 1408 | 3.35 |
| LOC_Os09g32960.1 | expressed protein                                                            | Chr9  | 19671224 | 19673501 + | 2  | 1090 | 3.35 |
| LOC_Os04g41820.1 | transcription factor RF2a, putative, expressed                               | Chr4  | 24769903 | 24773347 - | 4  | 1538 | 3.35 |
| LOC_Os05g19000.1 | expressed protein                                                            | Chr5  | 11025510 | 11027958 + | 4  | 1898 | 3.35 |
| LOC_Os08g43140.1 | expressed protein                                                            | Chr8  | 27292449 | 27293040 + | 1  | 624  | 3.35 |
| LOC_Os02g48590.1 | expressed protein                                                            | Chr2  | 29745546 | 29747414 + | 2  | 1101 | 3.35 |
| LOC_Os01g65630.1 | expressed protein                                                            | Chr1  | 38101544 | 38102991 - | 3  | 1102 | 3.35 |
| LOC_Os01g65630.2 | expressed protein                                                            | Chr1  | 38101544 | 38102991 - | 2  | 1150 | 3.35 |
| LOC_Os03g48480.1 | thioesterase family protein, putative, expressed                             | Chr3  | 27644551 | 27647533 - | 3  | 1168 | 3.35 |
| LOC_Os03g22780.1 | DVR, putative, expressed                                                     | Chr3  | 13155800 | 13157404 - | 1  | 1637 | 3.35 |
| LOC_Os06g12360.1 | pentatricopeptide, putative, expressed                                       | Chr6  | 6696666  | 6700782 +  | 6  | 2958 | 3.35 |
| LOC_Os01g38490.1 | expressed protein                                                            | Chr1  | 21627154 | 21627998 - | 1  | 877  | 3.35 |
| LOC_Os03g46730.1 | expressed protein                                                            | Chr3  | 26442702 | 26444359 + | 2  | 825  | 3.35 |
| LOC_Os05g07120.1 | basic helix-loop-helix, putative, expressed                                  | Chr5  | 3756476  | 3759789 +  | 3  | 1152 | 3.35 |
| LOC_Os05g17970.1 | retrotransposon protein, putative, unclassified, expressed                   | Chr5  | 10327611 | 10330542 - | 8  | 2551 | 3.36 |
| LOC_Os04g49260.1 | heavy metal-associated domain containing protein, expressed                  | Chr4  | 29408862 | 29409617 - | 2  | 678  | 3.36 |
| LOC_Os10g04600.3 | OsFBX359 - F-box domain containing protein, expressed                        | Chr10 | 2191954  | 2194603 +  | 3  | 1954 | 3.36 |
| LOC_Os11g10750.1 | OsSCP48 - Putative Serine Carboxypeptidase homologue, expressed              | Chr11 | 5898648  | 5902693 -  | 10 | 2243 | 3.36 |
| LOC_Os10g04780.1 | OsFBX363 - F-box domain containing protein, expressed                        | Chr10 | 2299438  | 2300571 -  | 1  | 1166 | 3.36 |
| LOC_Os08g01274.1 | expressed protein                                                            | Chr8  | 177152   | 182546 +   | 4  | 1901 | 3.36 |
| LOC_Os01g11340.1 | cytochrome P450, putative, expressed                                         | Chr1  | 6076688  | 6078711 -  | 1  | 2056 | 3.36 |
| LOC_Os07g48340.2 | OsCML24 - Calmodulin-related calcium sensor protein, expressed               | Chr7  | 28889110 | 28890529 + | 2  | 1248 | 3.36 |
| LOC_Os12g18130.2 | expressed protein                                                            | Chr12 | 10454432 | 10458548 - | 3  | 764  | 3.36 |
| LOC_Os06g23504.1 | DTW domain containing protein, putative, expressed                           | Chr6  | 13704784 | 13716851 + | 7  | 2247 | 3.36 |
| LOC_Os02g51910.1 | cytokinin-O-glucosyltransferase 2, putative, expressed                       | Chr2  | 31791009 | 31793891 - | 2  | 2749 | 3.37 |
| LOC_Os09g38772.1 | MOSC domain-containing protein, mitochondrial precursor, putative, expressed | Chr9  | 22278292 | 22281049 + | 8  | 1544 | 3.37 |
| LOC_Os02g55910.2 | monogalactosyldiacylglycerol synthase, putative, expressed                   | Chr2  | 34223738 | 34227621 + | 7  | 2100 | 3.37 |
| LOC_Os03g38260.1 | 60S ribosomal protein L19-3, putative, expressed                             | Chr3  | 21238601 | 21240862 - | 5  | 1099 | 3.37 |
| LOC_Os01g06300.1 | transposon protein, putative, unclassified, expressed                        | Chr1  | 2991397  | 2997317 -  | 10 | 4778 | 3.38 |
| LOC_Os03g08050.1 | elongation factor Tu, putative, expressed                                    | Chr3  | 4111409  | 4113361 +  | 2  | 1408 | 3.39 |
| LOC_Os04g42451.1 | expressed protein                                                            | Chr4  | 25121049 | 25122693 - | 3  | 1350 | 3.39 |
| LOC_Os01g17065.1 | expressed protein                                                            | Chr1  | 9809343  | 9810633 -  | 2  | 443  | 3.39 |
| LOC_Os10g40960.1 | oxidoreductase, 2OG-Fe oxygenase family protein, putative, expressed         | Chr10 | 21995563 | 21997584 - | 3  | 1310 | 3.39 |
| LOC_Os01g27390.1 | glutathione S-transferase, putative, expressed                               | Chr1  | 15291669 | 15294415 + | 3  | 1021 | 3.39 |
| LOC_Os09g20010.1 | SNF1-related protein kinase regulatory subunit beta-2, putative, expressed   | Chr9  | 11985971 | 11989563 + | 4  | 916  | 3.40 |
| LOC_Os03g54084.1 | phytochrome C, putative, expressed                                           | Chr3  | 31004724 | 31009782 + | 4  | 4132 | 3.40 |
| LOC_Os12g07190.1 | CBS domain-containing protein, putative, expressed                           | Chr12 | 3531359  | 3536426 -  | 14 | 2580 | 3.40 |
| LOC_Os04g31240.1 | hydrolase, alpha/beta fold family protein, putative, expressed               | Chr4  | 18690646 | 18694747 + | 8  | 1531 | 3.40 |
| LOC_Os02g45500.1 | expressed protein                                                            | Chr2  | 27680241 | 27681375 + | 3  | 813  | 3.41 |
| LOC_Os10g36860.1 | CRS1/YhbY domain containing protein, expressed                               | Chr10 | 19747202 | 19749626 - | 2  | 1105 | 3.41 |
| LOC_Os03g22259.1 | expressed protein                                                            | Chr3  | 12764508 | 12765877 + | 1  | 1402 | 3.41 |
| LOC_Os03g38230.1 | peptidase M50 family protein, putative, expressed                            | Chr3  | 21223996 | 21225936 - | 1  | 1973 | 3.41 |
| LOC_Os04g39440.3 | ras-related protein, putative, expressed                                     | Chr4  | 23492935 | 23494783 + | 5  | 1261 | 3.41 |
| LOC_Os01g08660.1 | aquaporin protein, putative, expressed                                       | Chr1  | 4313645  | 4315834 -  | 3  | 1284 | 3.41 |
| LOC_Os06g40790.1 | MLO domain containing protein, putative, expressed                           | Chr6  | 24332453 | 24338112 - | 11 | 1648 | 3.41 |

|                  |                                                                                              |       |          |            |    |      |      |
|------------------|----------------------------------------------------------------------------------------------|-------|----------|------------|----|------|------|
| LOC_Os04g43230.1 | expressed protein                                                                            | Chr4  | 25580894 | 25583161 - | 5  | 1863 | 3.41 |
| LOC_Os04g43230.2 | expressed protein                                                                            | Chr4  | 25580894 | 25583161 - | 4  | 1906 | 3.41 |
| LOC_Os01g10130.1 | RNA-dependent RNA polymerase, putative, expressed                                            | Chr1  | 5288135  | 5293325 -  | 8  | 1965 | 3.41 |
| LOC_Os12g34100.1 | expressed protein                                                                            | Chr12 | 20641716 | 20644530 - | 1  | 2847 | 3.41 |
| LOC_Os12g42600.1 | ubiquitin carboxyl-terminal hydrolase domain containing protein, expressed                   | Chr12 | 26454955 | 26461338 + | 15 | 3061 | 3.41 |
| LOC_Os09g31438.1 | OsSPL17 - SBP-box gene family member, expressed                                              | Chr9  | 18918260 | 18921656 - | 4  | 1605 | 3.41 |
| LOC_Os05g08800.1 | DUF581 domain containing protein, expressed                                                  | Chr5  | 4837556  | 4839861 -  | 3  | 1690 | 3.41 |
| LOC_Os01g65940.2 | expressed protein                                                                            | Chr1  | 38283814 | 38286794 - | 6  | 1738 | 3.41 |
| LOC_Os09g37410.1 | OsSAUR46 - Auxin-responsive SAUR gene family member, expressed                               | Chr9  | 21590478 | 21590900 + | 1  | 455  | 3.41 |
| LOC_Os09g28580.1 | expressed protein                                                                            | Chr9  | 17390968 | 17392541 - | 3  | 662  | 3.41 |
| LOC_Os01g01980.1 | expressed protein                                                                            | Chr1  | 529367   | 530008 -   | 1  | 674  | 3.41 |
| LOC_Os04g39440.2 | ras-related protein, putative, expressed                                                     | Chr4  | 23492935 | 23495366 + | 6  | 1287 | 3.41 |
| LOC_Os03g02770.1 | expressed protein                                                                            | Chr3  | 1077384  | 1079382 -  | 2  | 1978 | 3.41 |
| LOC_Os03g02770.2 | expressed protein                                                                            | Chr3  | 1077384  | 1079382 -  | 1  | 2031 | 3.41 |
| LOC_Os01g67530.1 | AMP-binding enzyme, putative, expressed                                                      | Chr1  | 39252983 | 39256753 + | 6  | 2206 | 3.41 |
| LOC_Os12g41910.1 | BTBN25 - Bric-a-Brac, Tramtrack, Broad Complex BTB domain with non-phototropic hypocotyl 3 ↑ | Chr12 | 25977555 | 25983016 - | 5  | 2944 | 3.41 |
| LOC_Os12g41910.2 | BTBN25 - Bric-a-Brac, Tramtrack, Broad Complex BTB domain with non-phototropic hypocotyl 3 ↑ | Chr12 | 25977555 | 25983016 - | 4  | 3147 | 3.41 |
| LOC_Os10g16680.1 | retrotransposon protein, putative, unclassified                                              | Chr10 | 8317539  | 8317910 -  | 1  | 404  | 3.41 |
| LOC_Os10g23090.1 | homeobox associated leucine zipper, putative, expressed                                      | Chr10 | 12041604 | 12043235 + | 2  | 1504 | 3.41 |
| LOC_Os04g49250.1 | UDP-glucose/GDP-mannose dehydrogenase family, central domain containing protein, expressed   | Chr4  | 29391121 | 29392759 + | 1  | 1671 | 3.41 |
| LOC_Os12g40780.1 | ankyrin repeat domain-containing protein 44, putative, expressed                             | Chr12 | 25242398 | 25246789 + | 12 | 2003 | 3.41 |
| LOC_Os11g12800.1 | glycerophosphoryl diester phosphodiesterase family protein, putative, expressed              | Chr11 | 7250435  | 7254534 -  | 9  | 1734 | 3.41 |
| LOC_Os06g41480.1 | vrga1, putative, expressed                                                                   | Chr6  | 24866897 | 24871210 + | 3  | 3998 | 3.41 |
| LOC_Os04g45280.3 | histidine triad family protein, putative, expressed                                          | Chr4  | 26754330 | 26757287 - | 6  | 1191 | 3.41 |
| LOC_Os02g39280.1 | C2 domain containing protein, putative, expressed                                            | Chr2  | 23720437 | 23726180 + | 16 | 2090 | 3.41 |
| LOC_Os08g31930.1 | BRCA1 C Terminus domain containing protein, expressed                                        | Chr8  | 19796449 | 19801162 + | 7  | 2309 | 3.41 |
| LOC_Os08g03676.1 | pentatricopeptide, putative, expressed                                                       | Chr8  | 1749850  | 1752468 +  | 1  | 2651 | 3.41 |
| LOC_Os01g70260.1 | receptor-like protein kinase 2 precursor, putative, expressed                                | Chr1  | 40679577 | 40683903 + | 3  | 2811 | 3.41 |
| LOC_Os01g70260.2 | receptor-like protein kinase 2 precursor, putative, expressed                                | Chr1  | 40679577 | 40683903 + | 2  | 2931 | 3.41 |
| LOC_Os03g01720.1 | protein binding protein, putative, expressed                                                 | Chr3  | 452399   | 459305 +   | 12 | 3258 | 3.41 |
| LOC_Os02g24632.1 | photosystem II 44 kDa reaction center protein, putative, expressed                           | Chr2  | 14285072 | 14286627 - | 1  | 1588 | 3.41 |
| LOC_Os01g29740.1 | expressed protein                                                                            | Chr1  | 16659734 | 16664416 + | 3  | 891  | 3.41 |
| LOC_Os06g27760.2 | peptide methionine sulfoxide reductase msrB, putative, expressed                             | Chr6  | 15719230 | 15721373 - | 4  | 1150 | 3.41 |
| LOC_Os05g29974.1 | lipase, putative, expressed                                                                  | Chr5  | 17336715 | 17344202 + | 8  | 2518 | 3.42 |
| LOC_Os12g08725.1 | retrotransposon protein, putative, unclassified, expressed                                   | Chr12 | 4456832  | 4460433 -  | 4  | 3194 | 3.42 |
| LOC_Os05g44900.1 | expressed protein                                                                            | Chr5  | 26094627 | 26095922 + | 2  | 1265 | 3.42 |
| LOC_Os01g01560.1 | transposon protein, putative, unclassified, expressed                                        | Chr1  | 284911   | 292118 -   | 5  | 2400 | 3.42 |
| LOC_Os06g20080.1 | expressed protein                                                                            | Chr6  | 11512551 | 11512709 + | 1  | 191  | 3.42 |
| LOC_Os03g38520.1 | expressed protein                                                                            | Chr3  | 21378137 | 21382233 + | 4  | 803  | 3.42 |
| LOC_Os02g46120.2 | regulatory protein, putative, expressed                                                      | Chr2  | 28108632 | 28113427 - | 5  | 3766 | 3.42 |
| LOC_Os11g16480.2 | transposon protein, putative, unclassified, expressed                                        | Chr11 | 9115882  | 9118470 -  | 6  | 1351 | 3.43 |
| LOC_Os08g41690.1 | expressed protein                                                                            | Chr8  | 26314755 | 26317837 - | 3  | 2621 | 3.43 |
| LOC_Os07g33850.2 | ras-related protein, putative, expressed                                                     | Chr7  | 20249139 | 20253102 + | 6  | 2183 | 3.44 |
| LOC_Os03g62280.1 | expressed protein                                                                            | Chr3  | 35284998 | 35287322 + | 3  | 883  | 3.44 |
| LOC_Os03g62280.2 | expressed protein                                                                            | Chr3  | 35284998 | 35287389 + | 4  | 1426 | 3.44 |

|                  |                                                                                      |       |          |            |    |      |      |
|------------------|--------------------------------------------------------------------------------------|-------|----------|------------|----|------|------|
| LOC_Os02g16660.2 | cbxX, chromosomal, putative, expressed                                               | Chr2  | 9514333  | 9518278 -  | 7  | 2137 | 3.45 |
| LOC_Os02g16660.1 | cbxX, chromosomal, putative, expressed                                               | Chr2  | 9514333  | 9518285 -  | 7  | 2119 | 3.45 |
| LOC_Os10g19970.1 | expressed protein                                                                    | Chr10 | 10022541 | 10023354 + | 1  | 846  | 3.45 |
| LOC_Os09g05020.2 | tyrosine phosphatase family protein, putative, expressed                             | Chr9  | 2697267  | 2702745 +  | 6  | 1596 | 3.45 |
| LOC_Os05g08390.1 | expressed protein                                                                    | Chr5  | 4578891  | 4579559 -  | 1  | 701  | 3.46 |
| LOC_Os06g50460.1 | expressed protein                                                                    | Chr6  | 30555601 | 30557078 + | 3  | 771  | 3.46 |
| LOC_Os12g01540.1 | expressed protein                                                                    | Chr12 | 324731   | 328238 +   | 6  | 891  | 3.46 |
| LOC_Os03g05240.1 | retrotransposon protein, putative, unclassified, expressed                           | Chr3  | 2538820  | 2539983 +  | 1  | 1196 | 3.46 |
| LOC_Os01g10504.2 | OsMADS3 - MADS-box family gene with MIKCC type-box, expressed                        | Chr1  | 5559548  | 5568844 -  | 10 | 1754 | 3.46 |
| LOC_Os07g45120.1 | expressed protein                                                                    | Chr7  | 26934311 | 26937417 + | 1  | 3139 | 3.46 |
| LOC_Os07g22270.1 | transposon protein, putative, Ac/Ds sub-class, expressed                             | Chr7  | 12482292 | 12486838 - | 8  | 3466 | 3.46 |
| LOC_Os05g50360.1 | anaphase-promoting complex subunit 10, putative, expressed                           | Chr5  | 28854805 | 28857818 + | 6  | 1207 | 3.46 |
| LOC_Os02g19650.3 | hydrolase, alpha/beta fold family domain containing protein, expressed               | Chr2  | 11484328 | 11488304 - | 11 | 2054 | 3.46 |
| LOC_Os01g48874.1 | wax synthase, putative, expressed                                                    | Chr1  | 28032816 | 28051830 - | 7  | 2415 | 3.46 |
| LOC_Os06g11640.1 | serine/threonine-protein phosphatase 2A activator 2, putative, expressed             | Chr6  | 6171585  | 6176329 -  | 2  | 1803 | 3.46 |
| LOC_Os09g04690.1 | expressed protein                                                                    | Chr9  | 2497167  | 2497809 -  | 2  | 445  | 3.46 |
| LOC_Os09g35900.1 | expressed protein                                                                    | Chr9  | 20659712 | 20660371 + | 1  | 692  | 3.46 |
| LOC_Os06g12040.1 | mTERF family protein, expressed                                                      | Chr6  | 6452737  | 6454454 -  | 1  | 1750 | 3.46 |
| LOC_Os02g49890.1 | retrotransposon protein, putative, unclassified, expressed                           | Chr2  | 30481829 | 30484760 + | 8  | 2296 | 3.46 |
| LOC_Os12g03980.1 | expressed protein                                                                    | Chr12 | 1651422  | 1652037 -  | 2  | 253  | 3.46 |
| LOC_Os06g06420.1 | glyoxalase/bleomycin resistance protein/dioxygenase, putative, expressed             | Chr6  | 2995767  | 2997991 +  | 3  | 722  | 3.46 |
| LOC_Os01g01090.1 | retrotransposon protein, putative, unclassified, expressed                           | Chr1  | 44595    | 47526 +    | 8  | 2665 | 3.46 |
| LOC_Os01g01610.1 | IscA-like iron-sulfur assembly protein, mitochondrial precursor, putative, expressed | Chr1  | 306869   | 308842 -   | 4  | 965  | 3.46 |
| LOC_Os02g46620.1 | expressed protein                                                                    | Chr2  | 28453885 | 28454909 + | 1  | 1057 | 3.46 |
| LOC_Os08g43760.1 | carrier, putative, expressed                                                         | Chr8  | 27645208 | 27646253 + | 1  | 1078 | 3.46 |
| LOC_Os06g03980.1 | expressed protein                                                                    | Chr6  | 1613664  | 1620183 -  | 15 | 2323 | 3.46 |
| LOC_Os02g05470.1 | CCT motif family protein, expressed                                                  | Chr2  | 2638417  | 2642111 +  | 3  | 2453 | 3.46 |
| LOC_Os04g21450.1 | retrotransposon, putative, centromere-specific                                       | Chr4  | 12126676 | 12128323 - | 5  | 1480 | 3.47 |
| LOC_Os03g06680.1 | plant-specific domain TIGR01615 family protein, expressed                            | Chr3  | 3379732  | 3381772 +  | 2  | 1993 | 3.47 |
| LOC_Os01g39134.2 | EF hand family protein, putative, expressed                                          | Chr1  | 22025915 | 22027269 - | 3  | 1229 | 3.47 |
| LOC_Os08g16960.1 | retrotransposon protein, putative, unclassified                                      | Chr8  | 10383446 | 10385887 + | 2  | 1930 | 3.47 |
| LOC_Os04g44780.2 | beta-expansin precursor, putative, expressed                                         | Chr4  | 26518761 | 26522056 + | 3  | 1518 | 3.47 |
| LOC_Os04g44780.1 | beta-expansin precursor, putative, expressed                                         | Chr4  | 26517446 | 26522055 + | 4  | 1674 | 3.47 |
| LOC_Os07g10495.1 | expressed protein                                                                    | Chr7  | 5652015  | 5653854 +  | 7  | 977  | 3.47 |
| LOC_Os12g01680.1 | macrophage migration inhibitory factor, putative, expressed                          | Chr12 | 411252   | 413211 +   | 3  | 930  | 3.47 |
| LOC_Os08g07840.1 | Poll-like DNA polymerase, putative, expressed                                        | Chr8  | 4390729  | 4400757 -  | 12 | 4481 | 3.47 |
| LOC_Os11g32280.2 | acetyltransferase, GNAT family, putative, expressed                                  | Chr11 | 19076279 | 19079312 - | 4  | 695  | 3.47 |
| LOC_Os04g16762.1 | photosystem I assembly protein ycf3, putative                                        | Chr4  | 9131244  | 9133216 -  | 3  | 606  | 3.47 |
| LOC_Os08g33540.1 | ATP-dependent Clp protease adaptor protein ClpS containing protein, expressed        | Chr8  | 20945056 | 20947979 - | 3  | 1022 | 3.47 |
| LOC_Os04g45280.1 | histidine triad family protein, putative, expressed                                  | Chr4  | 26754330 | 26757287 - | 6  | 1252 | 3.47 |
| LOC_Os11g12800.3 | glycerophosphoryl diester phosphodiesterase family protein, putative, expressed      | Chr11 | 7250435  | 7254534 -  | 8  | 1797 | 3.47 |
| LOC_Os12g38180.1 | heat shock cognate 70 kDa protein 2, putative, expressed                             | Chr12 | 23442170 | 23447194 + | 2  | 3714 | 3.48 |
| LOC_Os01g07330.3 | expressed protein                                                                    | Chr1  | 3456200  | 3464954 -  | 17 | 4331 | 3.48 |
| LOC_Os10g38216.1 | photosystem I assembly protein ycf3, putative, expressed                             | Chr10 | 20469945 | 20471922 + | 3  | 606  | 3.48 |
| LOC_Os01g57966.1 | photosystem I assembly protein ycf3, putative, expressed                             | Chr1  | 33527626 | 33529604 - | 3  | 606  | 3.49 |

|                  |                                                                         |       |          |            |    |      |      |
|------------------|-------------------------------------------------------------------------|-------|----------|------------|----|------|------|
| LOC_Os08g09780.1 | expressed protein                                                       | Chr8  | 5652681  | 5655649 +  | 5  | 2239 | 3.49 |
| LOC_Os08g09780.2 | expressed protein                                                       | Chr8  | 5652681  | 5655649 +  | 4  | 2374 | 3.49 |
| LOC_Os09g27370.2 | Spc97 / Spc98 family protein, putative, expressed                       | Chr9  | 16633330 | 16636149 + | 2  | 2794 | 3.49 |
| LOC_Os04g12900.1 | glucosyltransferase, putative, expressed                                | Chr4  | 7128690  | 7130895 +  | 5  | 1174 | 3.50 |
| LOC_Os12g05370.1 | RING-H2 finger protein, putative, expressed                             | Chr12 | 2426128  | 2429786 -  | 5  | 1123 | 3.50 |
| LOC_Os04g43440.2 | NB-ARC/LRR disease resistance protein, putative, expressed              | Chr4  | 25708299 | 25712547 - | 2  | 632  | 3.51 |
| LOC_Os03g48440.1 | expressed protein                                                       | Chr3  | 27583885 | 27587124 - | 5  | 781  | 3.51 |
| LOC_Os09g14300.1 | retrotransposon protein, putative, unclassified                         | Chr9  | 8452141  | 8452900 -  | 2  | 502  | 3.51 |
| LOC_Os06g39240.2 | endothelial differentiation-related factor 1, putative, expressed       | Chr6  | 23293234 | 23294078 - | 2  | 720  | 3.51 |
| LOC_Os06g39240.1 | endothelial differentiation-related factor 1, putative, expressed       | Chr6  | 23293234 | 23294073 - | 1  | 872  | 3.51 |
| LOC_Os05g03030.1 | 50S ribosomal protein L10, chloroplast precursor, putative, expressed   | Chr5  | 1146189  | 1147106 -  | 1  | 950  | 3.51 |
| LOC_Os02g01275.1 | expressed protein                                                       | Chr2  | 152788   | 153882 +   | 1  | 1127 | 3.51 |
| LOC_Os12g11820.1 | retrotransposon protein, putative, Ty3-gypsy subclass, expressed        | Chr12 | 6415009  | 6416870 -  | 2  | 945  | 3.51 |
| LOC_Os03g05220.2 | expressed protein                                                       | Chr3  | 2530961  | 2531703 +  | 2  | 532  | 3.51 |
| LOC_Os01g19380.1 | pentatricopeptide, putative, expressed                                  | Chr1  | 10965000 | 10968073 + | 4  | 1514 | 3.51 |
| LOC_Os10g28680.1 | DUF581 domain containing protein, expressed                             | Chr10 | 14960578 | 14962880 - | 3  | 1721 | 3.51 |
| LOC_Os03g13400.1 | ZOS3-06 - C2H2 zinc finger protein, expressed                           | Chr3  | 7237162  | 7241445 -  | 3  | 1832 | 3.51 |
| LOC_Os04g44610.1 | white-brown complex homolog protein 11, putative, expressed             | Chr4  | 26395912 | 26401662 + | 10 | 3000 | 3.51 |
| LOC_Os08g05660.1 | expressed protein                                                       | Chr8  | 3022572  | 3026785 -  | 10 | 1859 | 3.51 |
| LOC_Os01g72670.3 | expressed protein                                                       | Chr1  | 42162592 | 42166462 - | 9  | 2019 | 3.51 |
| LOC_Os01g72670.1 | expressed protein                                                       | Chr1  | 42162484 | 42166462 - | 8  | 2029 | 3.51 |
| LOC_Os06g12030.3 | glutaredoxin domain containing protein, putative, expressed             | Chr6  | 6443327  | 6447392 -  | 5  | 2212 | 3.51 |
| LOC_Os01g24980.2 | naringenin,2-oxoglutarate 3-dioxygenase, putative, expressed            | Chr1  | 14079227 | 14080716 + | 3  | 1388 | 3.51 |
| LOC_Os07g26420.1 | expressed protein                                                       | Chr7  | 15184580 | 15187303 + | 6  | 1539 | 3.51 |
| LOC_Os04g20280.1 | expressed protein                                                       | Chr4  | 11335426 | 11338820 + | 10 | 1685 | 3.51 |
| LOC_Os04g20280.2 | expressed protein                                                       | Chr4  | 11335426 | 11338820 + | 9  | 1773 | 3.51 |
| LOC_Os01g24980.1 | naringenin,2-oxoglutarate 3-dioxygenase, putative, expressed            | Chr1  | 14077629 | 14080716 + | 5  | 1878 | 3.51 |
| LOC_Os07g20370.1 | retrotransposon, putative, centromere-specific, expressed               | Chr7  | 11761686 | 11767394 + | 7  | 1958 | 3.51 |
| LOC_Os07g02590.2 | expressed protein                                                       | Chr7  | 928540   | 931304 -   | 2  | 2066 | 3.51 |
| LOC_Os12g23520.1 | retrotransposon protein, putative, Ty3-gypsy subclass, expressed        | Chr12 | 13300352 | 13315559 + | 16 | 6684 | 3.51 |
| LOC_Os10g09200.1 | expressed protein                                                       | Chr10 | 4966522  | 4969996 +  | 5  | 610  | 3.51 |
| LOC_Os09g36000.1 | expressed protein                                                       | Chr9  | 20741659 | 20742774 - | 1  | 1148 | 3.51 |
| LOC_Os07g34950.1 | uncharacterized membrane protein, putative, expressed                   | Chr7  | 20936091 | 20941652 + | 6  | 1446 | 3.51 |
| LOC_Os05g18910.1 | retrotransposon protein, putative, unclassified, expressed              | Chr5  | 10978604 | 10981531 + | 7  | 2559 | 3.51 |
| LOC_Os06g36530.1 | hAT dimerisation domain-containing protein, putative, expressed         | Chr6  | 21461006 | 21463644 - | 2  | 2614 | 3.51 |
| LOC_Os09g32740.1 | ubiquitin carboxyl-terminal hydrolase family protein, expressed         | Chr9  | 19522112 | 19527787 - | 3  | 4048 | 3.51 |
| LOC_Os05g46920.1 | expressed protein                                                       | Chr5  | 27150614 | 27153839 + | 4  | 2226 | 3.52 |
| LOC_Os05g49990.1 | expressed protein                                                       | Chr5  | 28667173 | 28668899 + | 2  | 711  | 3.52 |
| LOC_Os06g03790.1 | 39S ribosomal protein L47, mitochondrial precursor, putative, expressed | Chr6  | 1512795  | 1516434 +  | 3  | 1032 | 3.52 |
| LOC_Os03g15290.1 | beclin-1, putative, expressed                                           | Chr3  | 8369347  | 8370978 +  | 1  | 1664 | 3.52 |
| LOC_Os08g16940.1 | ZOS8-01 - C2H2 zinc finger protein, expressed                           | Chr8  | 10372707 | 10374868 - | 2  | 1743 | 3.52 |
| LOC_Os03g19059.1 | anaphase-promoting complex subunit 11, putative, expressed              | Chr3  | 10672583 | 10674058 + | 2  | 1047 | 3.52 |
| LOC_Os02g05470.2 | CCT motif family protein, expressed                                     | Chr2  | 2638417  | 2642064 +  | 3  | 2444 | 3.52 |
| LOC_Os09g37040.1 | DUF630/DUF632 domains containing protein, putative, expressed           | Chr9  | 21366391 | 21370393 + | 4  | 2622 | 3.52 |
| LOC_Os01g55570.3 | expressed protein                                                       | Chr1  | 32014524 | 32016278 + | 6  | 966  | 3.52 |

|                  |                                                                                   |       |          |            |    |      |      |
|------------------|-----------------------------------------------------------------------------------|-------|----------|------------|----|------|------|
| LOC_Os05g44300.1 | plant-specific domain TIGR01615 family protein, expressed                         | Chr5  | 25776476 | 25778593 - | 3  | 1396 | 3.52 |
| LOC_Os08g26260.1 | retrotransposon protein, putative, Ty3-gypsy subclass, expressed                  | Chr8  | 16008797 | 16011637 + | 2  | 1448 | 3.52 |
| LOC_Os01g67600.1 | CXE carboxylesterase, putative, expressed                                         | Chr1  | 39296926 | 39299837 - | 2  | 1944 | 3.52 |
| LOC_Os01g56640.2 | transcription factor jumonji, putative, expressed                                 | Chr1  | 32677412 | 32681407 - | 7  | 3122 | 3.52 |
| LOC_Os01g42980.3 | ribosomal protein L22, putative, expressed                                        | Chr1  | 24480855 | 24482542 + | 4  | 947  | 3.52 |
| LOC_Os10g21020.1 | expressed protein                                                                 | Chr10 | 10653202 | 10654972 - | 3  | 949  | 3.52 |
| LOC_Os03g53740.1 | expressed protein                                                                 | Chr3  | 30809029 | 30810138 + | 3  | 997  | 3.52 |
| LOC_Os04g53010.1 | transposon protein, putative, unclassified, expressed                             | Chr4  | 31569285 | 31575203 + | 13 | 4487 | 3.52 |
| LOC_Os05g07950.1 | OsFBX160 - F-box domain containing protein, expressed                             | Chr5  | 4309096  | 4310422 -  | 4  | 632  | 3.52 |
| LOC_Os01g52650.1 | POEI44 - Pollen Ole e I allergen and extensin family protein precursor, expressed | Chr1  | 30263383 | 30264381 - | 2  | 959  | 3.52 |
| LOC_Os08g34150.1 | OsTIL-2 Temperature-induced lipocalin-2, expressed                                | Chr8  | 21407407 | 21408779 + | 2  | 1342 | 3.52 |
| LOC_Os03g03530.1 | expressed protein                                                                 | Chr3  | 1525179  | 1527103 -  | 3  | 721  | 3.52 |
| LOC_Os05g41010.1 | oxidoreductase, putative, expressed                                               | Chr5  | 24040970 | 24043906 + | 7  | 1928 | 3.53 |
| LOC_Os02g52820.1 | cold-induced protein, putative, expressed                                         | Chr2  | 32295320 | 32298691 + | 5  | 1865 | 3.53 |
| LOC_Os12g03700.1 | expressed protein                                                                 | Chr12 | 1494517  | 1495560 -  | 1  | 1076 | 3.54 |
| LOC_Os04g51800.1 | MYB protein, putative, expressed                                                  | Chr4  | 30702497 | 30710998 + | 11 | 1012 | 3.54 |
| LOC_Os04g38830.1 | transposon protein, putative, unclassified, expressed                             | Chr4  | 23088970 | 23091700 - | 2  | 2410 | 3.54 |
| LOC_Os07g02000.1 | expressed protein                                                                 | Chr7  | 607681   | 608705 +   | 3  | 858  | 3.55 |
| LOC_Os06g44374.1 | protein transport protein SEC61 subunit gamma, putative, expressed                | Chr6  | 26782832 | 26784850 - | 3  | 690  | 3.55 |
| LOC_Os07g36500.1 | Core histone H2A/H2B/H3/H4 domain containing protein, putative, expressed         | Chr7  | 21827213 | 21827867 + | 1  | 687  | 3.56 |
| LOC_Os04g59590.3 | methyltransferase, putative, expressed                                            | Chr4  | 35434964 | 35438403 + | 8  | 2392 | 3.56 |
| LOC_Os04g59590.2 | methyltransferase, putative, expressed                                            | Chr4  | 35434949 | 35438404 + | 8  | 2411 | 3.56 |
| LOC_Os12g25640.1 | SAP domain containing protein, expressed                                          | Chr12 | 14838519 | 14845431 - | 6  | 1092 | 3.56 |
| LOC_Os06g16890.1 | retrotransposon protein, putative, Ty3-gypsy subclass, expressed                  | Chr6  | 9788143  | 9794804 +  | 3  | 5448 | 3.56 |
| LOC_Os05g50170.1 | ATPCME, putative, expressed                                                       | Chr5  | 28745289 | 28751809 - | 12 | 2041 | 3.56 |
| LOC_Os02g04750.2 | cycloartenol synthase, putative, expressed                                        | Chr2  | 2161769  | 2166648 -  | 13 | 2101 | 3.56 |
| LOC_Os02g04750.1 | cycloartenol synthase, putative, expressed                                        | Chr2  | 2161769  | 2166648 -  | 13 | 2137 | 3.56 |
| LOC_Os02g04750.3 | cycloartenol synthase, putative, expressed                                        | Chr2  | 2161769  | 2166648 -  | 12 | 2153 | 3.56 |
| LOC_Os04g16742.1 | NADPH-dependent oxidoreductase, putative, expressed                               | Chr4  | 9116367  | 9118611 -  | 2  | 1597 | 3.56 |
| LOC_Os04g16854.1 | NADPH-dependent oxidoreductase, putative, expressed                               | Chr4  | 9164684  | 9166928 -  | 2  | 1597 | 3.56 |
| LOC_Os01g65620.1 | expressed protein                                                                 | Chr1  | 38098937 | 38099628 - | 1  | 724  | 3.56 |
| LOC_Os08g03860.1 | expressed protein                                                                 | Chr8  | 1840446  | 1841245 +  | 2  | 781  | 3.56 |
| LOC_Os03g03470.1 | expressed protein                                                                 | Chr3  | 1499639  | 1504242 -  | 9  | 1557 | 3.56 |
| LOC_Os05g01444.1 | polygalacturonase inhibitor precursor, putative, expressed                        | Chr5  | 256779   | 258432 +   | 1  | 1686 | 3.56 |
| LOC_Os06g05950.1 | expressed protein                                                                 | Chr6  | 2724131  | 2726538 -  | 7  | 1711 | 3.56 |
| LOC_Os05g30700.1 | expressed protein                                                                 | Chr5  | 17779880 | 17781811 + | 2  | 1797 | 3.56 |
| LOC_Os07g10730.1 | polygalacturonase, putative, expressed                                            | Chr7  | 5822834  | 5824007 +  | 3  | 882  | 3.56 |
| LOC_Os07g10880.1 | expressed protein                                                                 | Chr7  | 5944731  | 5946227 +  | 1  | 1529 | 3.56 |
| LOC_Os03g02840.4 | remorin family protein, putative, expressed                                       | Chr3  | 1109242  | 1112730 -  | 6  | 1722 | 3.56 |
| LOC_Os03g02840.1 | remorin family protein, putative, expressed                                       | Chr3  | 1109242  | 1113045 -  | 6  | 1774 | 3.56 |
| LOC_Os09g36690.1 | expressed protein                                                                 | Chr9  | 21162243 | 21163619 + | 3  | 768  | 3.56 |
| LOC_Os05g47820.2 | expressed protein                                                                 | Chr5  | 27413101 | 27414368 - | 3  | 1152 | 3.56 |
| LOC_Os01g44250.1 | CBS domain containing membrane protein, putative, expressed                       | Chr1  | 25368481 | 25371011 + | 7  | 1540 | 3.56 |
| LOC_Os10g07080.1 | expressed protein                                                                 | Chr10 | 3727965  | 3730365 +  | 2  | 1658 | 3.56 |
| LOC_Os05g47820.1 | expressed protein                                                                 | Chr5  | 27412286 | 27414407 - | 3  | 2006 | 3.56 |



|                  |                                                                       |       |          |            |    |      |      |
|------------------|-----------------------------------------------------------------------|-------|----------|------------|----|------|------|
| LOC_Os07g02590.1 | expressed protein                                                     | Chr7  | 928495   | 931304 -   | 2  | 2048 | 3.56 |
| LOC_Os10g21216.1 | uncharacterized protein ycf70, putative                               | Chr10 | 10821197 | 10821466 - | 1  | 302  | 3.56 |
| LOC_Os05g41890.1 | expressed protein                                                     | Chr5  | 24533226 | 24535879 - | 3  | 933  | 3.56 |
| LOC_Os10g16930.1 | expressed protein                                                     | Chr10 | 8462628  | 8464599 +  | 4  | 503  | 3.56 |
| LOC_Os05g49990.3 | expressed protein                                                     | Chr5  | 28667173 | 28668904 + | 3  | 794  | 3.56 |
| LOC_Os04g47900.1 | ATTIM23-2, putative, expressed                                        | Chr4  | 28479502 | 28480356 - | 1  | 887  | 3.56 |
| LOC_Os08g39170.1 | expressed protein                                                     | Chr8  | 24734910 | 24738361 - | 3  | 1950 | 3.56 |
| LOC_Os10g25020.1 | red chlorophyll catabolite reductase, putative, expressed             | Chr10 | 12879408 | 12880295 - | 3  | 606  | 3.57 |
| LOC_Os11g40570.3 | plant viral response family protein, putative, expressed              | Chr11 | 24210646 | 24214314 - | 2  | 1743 | 3.57 |
| LOC_Os11g40570.1 | plant viral response family protein, putative, expressed              | Chr11 | 24210675 | 24214593 - | 3  | 1809 | 3.57 |
| LOC_Os11g40570.2 | plant viral response family protein, putative, expressed              | Chr11 | 24210646 | 24214593 - | 3  | 1829 | 3.57 |
| LOC_Os01g43010.2 | transposon protein, putative, unclassified, expressed                 | Chr1  | 24491925 | 24497895 + | 6  | 3325 | 3.57 |
| LOC_Os11g12660.1 | transposon protein, putative, unclassified, expressed                 | Chr11 | 7133222  | 7138346 +  | 9  | 3921 | 3.57 |
| LOC_Os06g06810.1 | OsSub49 - Putative Subtilisin homologue, expressed                    | Chr6  | 3213518  | 3219042 +  | 6  | 3082 | 3.57 |
| LOC_Os09g30170.3 | F-box protein interaction domain containing protein, expressed        | Chr9  | 18360671 | 18364013 + | 4  | 2373 | 3.57 |
| LOC_Os12g18150.1 | ZOS12-04 - C2H2 zinc finger protein, expressed                        | Chr12 | 10468182 | 10478398 - | 7  | 4930 | 3.57 |
| LOC_Os11g03130.1 | E2F-related protein, putative, expressed                              | Chr11 | 1128553  | 1130425 +  | 2  | 1057 | 3.57 |
| LOC_Os07g48770.1 | serine hydrolase domain containing protein, expressed                 | Chr7  | 29195071 | 29197465 - | 6  | 1301 | 3.57 |
| LOC_Os09g28750.1 | gibberellin receptor GID1L2, putative, expressed                      | Chr9  | 17471021 | 17472213 - | 1  | 1225 | 3.57 |
| LOC_Os02g45150.2 | expressed protein                                                     | Chr2  | 27386916 | 27388941 + | 1  | 2058 | 3.57 |
| LOC_Os02g42570.1 | ferredoxin-thioredoxin reductase, variable chain, putative, expressed | Chr2  | 25589926 | 25590804 - | 1  | 911  | 3.57 |
| LOC_Os01g15390.1 | expressed protein                                                     | Chr1  | 8627820  | 8629150 +  | 2  | 1238 | 3.57 |
| LOC_Os08g18810.1 | conserved hypothetical protein                                        | Chr8  | 11219593 | 11221826 + | 2  | 2257 | 3.57 |
| LOC_Os01g70570.3 | acyltransferase, putative, expressed                                  | Chr1  | 40866509 | 40868344 - | 4  | 1247 | 3.57 |
| LOC_Os05g01950.1 | expressed protein                                                     | Chr5  | 542156   | 542984 +   | 1  | 861  | 3.57 |
| LOC_Os06g48235.1 | expressed protein                                                     | Chr6  | 29175691 | 29177070 + | 2  | 401  | 3.57 |
| LOC_Os01g72670.2 | expressed protein                                                     | Chr1  | 42162567 | 42166462 - | 8  | 1970 | 3.57 |
| LOC_Os07g25004.1 | NADPH-dependent oxidoreductase, putative, expressed                   | Chr7  | 14237700 | 14239944 + | 2  | 1597 | 3.57 |
| LOC_Os08g15248.1 | NADPH-dependent oxidoreductase, putative, expressed                   | Chr8  | 9255763  | 9258007 +  | 2  | 1597 | 3.58 |
| LOC_Os01g13280.1 | ubiquitin conjugating enzyme protein, putative, expressed             | Chr1  | 7404888  | 7409640 -  | 8  | 1977 | 3.58 |
| LOC_Os04g58870.2 | exo70 exocyst complex subunit, putative, expressed                    | Chr4  | 35016589 | 35020137 - | 12 | 2251 | 3.58 |
| LOC_Os04g58870.3 | exo70 exocyst complex subunit, putative, expressed                    | Chr4  | 35016589 | 35020151 - | 12 | 2411 | 3.58 |
| LOC_Os01g50320.1 | surp module family protein, putative, expressed                       | Chr1  | 28885409 | 28890942 + | 4  | 3138 | 3.58 |
| LOC_Os07g04850.2 | pre-mRNA-processing factor 31, putative, expressed                    | Chr7  | 2144163  | 2151799 +  | 10 | 4345 | 3.58 |
| LOC_Os08g44015.1 | growth regulator related protein, putative, expressed                 | Chr8  | 27708166 | 27712650 + | 10 | 2584 | 3.58 |
| LOC_Os08g03750.1 | expressed protein                                                     | Chr8  | 1781135  | 1785623 -  | 11 | 2095 | 3.58 |
| LOC_Os05g45590.1 | hexokinase, putative, expressed                                       | Chr5  | 26418621 | 26422556 - | 9  | 2123 | 3.58 |
| LOC_Os05g26010.1 | transposon protein, putative, unclassified, expressed                 | Chr5  | 15116613 | 15122720 + | 10 | 4691 | 3.58 |
| LOC_Os02g48122.1 | PPR repeat domain containing protein, putative, expressed             | Chr2  | 29463827 | 29465660 - | 1  | 1866 | 3.59 |
| LOC_Os05g36070.3 | signal peptide peptidase domain containing protein, expressed         | Chr5  | 21370159 | 21376605 + | 12 | 2017 | 3.59 |
| LOC_Os03g08330.1 | ZIM domain containing protein, putative, expressed                    | Chr3  | 4248884  | 4249985 +  | 1  | 1134 | 3.59 |
| LOC_Os06g08540.2 | formin-like protein 13, putative, expressed                           | Chr6  | 4224295  | 4228006 +  | 4  | 2300 | 3.59 |
| LOC_Os04g08764.1 | avr9/Cf-9 rapidly elicited protein 137, putative, expressed           | Chr4  | 4769894  | 4772045 -  | 2  | 1600 | 3.60 |
| LOC_Os05g36070.1 | signal peptide peptidase domain containing protein, expressed         | Chr5  | 21370156 | 21376605 + | 13 | 2129 | 3.60 |
| LOC_Os05g36070.2 | signal peptide peptidase domain containing protein, expressed         | Chr5  | 21370163 | 21376605 + | 12 | 2203 | 3.60 |

|                  |                                                                                            |       |          |            |    |      |      |
|------------------|--------------------------------------------------------------------------------------------|-------|----------|------------|----|------|------|
| LOC_Os12g15430.1 | expressed protein                                                                          | Chr12 | 8814472  | 8814741 -  | 1  | 302  | 3.60 |
| LOC_Os12g32790.1 | disease resistance RPP13-like protein 1, putative, expressed                               | Chr12 | 19805936 | 19809658 + | 2  | 3669 | 3.60 |
| LOC_Os10g08011.1 | expressed protein                                                                          | Chr10 | 4322914  | 4323972 -  | 1  | 1091 | 3.60 |
| LOC_Os03g08770.1 | modifier of rudimentary protein, expressed                                                 | Chr3  | 4532886  | 4536625 +  | 8  | 1482 | 3.60 |
| LOC_Os03g08770.2 | modifier of rudimentary protein, expressed                                                 | Chr3  | 4532886  | 4536625 +  | 8  | 1479 | 3.60 |
| LOC_Os08g34130.1 | mitochondrial glycoprotein, putative, expressed                                            | Chr8  | 21397699 | 21399524 + | 2  | 1158 | 3.60 |
| LOC_Os08g18730.1 | retrotransposon protein, putative, unclassified, expressed                                 | Chr8  | 11174774 | 11185712 + | 4  | 7691 | 3.61 |
| LOC_Os04g15600.1 | receptor kinase, putative, expressed                                                       | Chr4  | 8484713  | 8485997 +  | 2  | 697  | 3.61 |
| LOC_Os11g47170.1 | receptor-like protein kinase precursor, putative, expressed                                | Chr11 | 28374214 | 28374891 + | 2  | 640  | 3.61 |
| LOC_Os06g05950.3 | expressed protein                                                                          | Chr6  | 2724123  | 2726535 -  | 7  | 1711 | 3.61 |
| LOC_Os06g05950.2 | expressed protein                                                                          | Chr6  | 2724123  | 2726535 -  | 5  | 1914 | 3.61 |
| LOC_Os05g51470.1 | 2-aminoethanethiol dioxygenase, putative, expressed                                        | Chr5  | 29506977 | 29509972 + | 5  | 1815 | 3.61 |
| LOC_Os09g39230.1 | prephenate dehydratase domain containing protein, expressed                                | Chr9  | 22542184 | 22543865 + | 1  | 1714 | 3.61 |
| LOC_Os09g15350.2 | expressed protein                                                                          | Chr9  | 9385267  | 9387226 +  | 1  | 1992 | 3.61 |
| LOC_Os01g61630.1 | expressed protein                                                                          | Chr1  | 35658744 | 35661037 + | 1  | 2326 | 3.61 |
| LOC_Os04g48300.1 | hypothetical protein                                                                       | Chr4  | 28786771 | 28787582 - | 3  | 744  | 3.61 |
| LOC_Os04g48375.1 | WD domain, G-beta repeat domain containing protein, expressed                              | Chr4  | 28849267 | 28851949 + | 8  | 1204 | 3.61 |
| LOC_Os06g23560.1 | anthocyanidin 5,3-O-glucosyltransferase, putative, expressed                               | Chr6  | 13743329 | 13745442 - | 1  | 2146 | 3.61 |
| LOC_Os12g05590.1 | RCN3 Centroradialis-like1 homologous to TFL1 gene%3B contains Pfam profile PF01161%3A Phos | Chr12 | 2565213  | 2566562 -  | 4  | 1035 | 3.61 |
| LOC_Os04g39440.1 | ras-related protein, putative, expressed                                                   | Chr4  | 23493028 | 23495366 + | 5  | 1266 | 3.61 |
| LOC_Os11g09020.1 | amino acid transporter, putative, expressed                                                | Chr11 | 4799114  | 4801313 +  | 3  | 2096 | 3.61 |
| LOC_Os04g07490.1 | retrotransposon protein, putative, Ty3-gypsy subclass, expressed                           | Chr4  | 3980728  | 3984937 -  | 5  | 1705 | 3.61 |
| LOC_Os02g22260.2 | fruit protein PKIWI502, putative, expressed                                                | Chr2  | 13280881 | 13292533 + | 5  | 1804 | 3.61 |
| LOC_Os06g34830.1 | amino acid permease family protein, putative, expressed                                    | Chr6  | 20251477 | 20253967 + | 1  | 2523 | 3.61 |
| LOC_Os06g41030.1 | DUF1680 domain containing protein, putative, expressed                                     | Chr6  | 24502390 | 24507547 - | 12 | 3404 | 3.61 |
| LOC_Os02g41460.1 | DUF640 domain containing protein, putative, expressed                                      | Chr2  | 24830541 | 24832108 - | 3  | 1308 | 3.61 |
| LOC_Os02g15580.2 | cyclic nucleotide-gated ion channel 1, putative, expressed                                 | Chr2  | 8749822  | 8756041 -  | 7  | 2614 | 3.61 |
| LOC_Os01g52890.1 | expressed protein                                                                          | Chr1  | 30412827 | 30413574 - | 1  | 780  | 3.61 |
| LOC_Os11g06860.1 | expressed protein                                                                          | Chr11 | 3367561  | 3368847 -  | 1  | 1319 | 3.61 |
| LOC_Os08g40020.1 | selenium binding protein, putative, expressed                                              | Chr8  | 25344705 | 25346660 + | 2  | 1877 | 3.62 |
| LOC_Os03g60110.1 | KH domain containing protein, putative, expressed                                          | Chr3  | 34186394 | 34190839 + | 7  | 1886 | 3.62 |
| LOC_Os02g27830.1 | expressed protein                                                                          | Chr2  | 16477199 | 16484046 - | 16 | 2375 | 3.62 |
| LOC_Os02g57100.1 | expressed protein                                                                          | Chr2  | 34963624 | 34966602 - | 5  | 1396 | 3.62 |
| LOC_Os04g35560.1 | glutathione S-transferase, putative, expressed                                             | Chr4  | 21662078 | 21664360 - | 3  | 1480 | 3.62 |
| LOC_Os01g34880.1 | callose synthase, putative, expressed                                                      | Chr1  | 19258341 | 19260839 - | 5  | 1885 | 3.62 |
| LOC_Os04g09860.1 | actin, putative, expressed                                                                 | Chr4  | 5292922  | 5293600 +  | 2  | 256  | 3.62 |
| LOC_Os02g14874.2 | expressed protein                                                                          | Chr2  | 8276843  | 8278413 +  | 3  | 980  | 3.62 |
| LOC_Os06g19460.1 | expressed protein                                                                          | Chr6  | 11084748 | 11085720 + | 2  | 572  | 3.62 |
| LOC_Os06g30470.1 | expressed protein                                                                          | Chr6  | 17609797 | 17612796 + | 4  | 1560 | 3.62 |
| LOC_Os04g16896.1 | uncharacterized protein ycf68, putative                                                    | Chr4  | 9096123  | 9096524 +  | 1  | 434  | 3.62 |
| LOC_Os11g03220.1 | RNA binding protein, putative, expressed                                                   | Chr11 | 1167726  | 1170428 -  | 7  | 1430 | 3.63 |
| LOC_Os01g52270.1 | NB-ARC domain containing protein, expressed                                                | Chr1  | 30048291 | 30049986 + | 1  | 1728 | 3.63 |
| LOC_Os06g15779.1 | aluminum-activated malate transporter, putative, expressed                                 | Chr6  | 8960001  | 8964689 -  | 6  | 2266 | 3.63 |
| LOC_Os09g05080.1 | retrotransposon protein, putative, unclassified, expressed                                 | Chr9  | 2731819  | 2737327 -  | 2  | 4954 | 3.63 |
| LOC_Os03g22400.3 | ulp1 protease family protein, putative, expressed                                          | Chr3  | 12826014 | 12828278 - | 4  | 1662 | 3.63 |

|                  |                                                                                            |       |          |            |    |      |      |
|------------------|--------------------------------------------------------------------------------------------|-------|----------|------------|----|------|------|
| LOC_Os01g17070.1 | OsDegp1 - Putative Deg protease homologue, expressed                                       | Chr1  | 9816783  | 9822750 +  | 11 | 2225 | 3.63 |
| LOC_Os01g05610.1 | Core histone H2A/H2B/H3/H4 domain containing protein, putative, expressed                  | Chr1  | 2674400  | 2675373 +  | 1  | 1006 | 3.64 |
| LOC_Os03g17084.1 | Core histone H2A/H2B/H3/H4 domain containing protein, putative, expressed                  | Chr3  | 9492890  | 9497494 +  | 4  | 1382 | 3.64 |
| LOC_Os11g05080.1 | powdery mildew resistant protein 5, putative, expressed                                    | Chr11 | 2224748  | 2229065 +  | 4  | 2620 | 3.64 |
| LOC_Os07g05390.1 | expressed protein                                                                          | Chr7  | 2468568  | 2473957 -  | 6  | 3331 | 3.64 |
| LOC_Os01g11250.1 | potassium channel KAT1, putative, expressed                                                | Chr1  | 6017742  | 6022156 -  | 11 | 2604 | 3.64 |
| LOC_Os01g34860.1 | expressed protein                                                                          | Chr1  | 19245153 | 19248201 - | 3  | 2492 | 3.65 |
| LOC_Os07g28800.1 | heat shock protein DnaJ, putative, expressed                                               | Chr7  | 16863279 | 16867122 - | 7  | 1034 | 3.65 |
| LOC_Os03g22680.1 | RING finger and CHY zinc finger domain-containing protein 1, putative, expressed           | Chr3  | 13095798 | 13098245 - | 12 | 1455 | 3.65 |
| LOC_Os04g32060.1 | transposon protein, putative, unclassified, expressed                                      | Chr4  | 19228118 | 19231880 + | 7  | 2144 | 3.65 |
| LOC_Os04g32060.2 | transposon protein, putative, unclassified, expressed                                      | Chr4  | 19227268 | 19231880 + | 7  | 2694 | 3.65 |
| LOC_Os07g04850.3 | pre-mRNA-processing factor 31, putative, expressed                                         | Chr7  | 2144160  | 2151799 +  | 9  | 4879 | 3.65 |
| LOC_Os03g28140.1 | 1-phosphatidylinositol-4-phosphate 5-kinase/ zinc ion binding protein, putative, expressed | Chr3  | 16182022 | 16192749 - | 11 | 5809 | 3.65 |
| LOC_Os07g04850.1 | pre-mRNA-processing factor 31, putative, expressed                                         | Chr7  | 2144150  | 2151824 +  | 10 | 4352 | 3.65 |
| LOC_Os06g30830.1 | OsMADS76 - MADS-box family gene with M-alpha type-box, expressed                           | Chr6  | 17887762 | 17891217 - | 3  | 822  | 3.65 |
| LOC_Os01g07410.1 | growth regulator related protein, putative, expressed                                      | Chr1  | 3511835  | 3515902 +  | 8  | 2440 | 3.65 |
| LOC_Os02g26550.3 | ubiquitin carboxyl-terminal hydrolase, family 1, putative, expressed                       | Chr2  | 15584117 | 15590536 + | 5  | 3961 | 3.65 |
| LOC_Os06g19420.1 | expressed protein                                                                          | Chr6  | 11064049 | 11065140 - | 2  | 436  | 3.65 |
| LOC_Os12g26060.1 | bifunctional dihydrofolate reductase-thymidylate synthase, putative, expressed             | Chr12 | 15134407 | 15140195 + | 9  | 1698 | 3.65 |
| LOC_Os02g56950.1 | expressed protein                                                                          | Chr2  | 34907528 | 34910822 - | 9  | 2028 | 3.65 |
| LOC_Os09g38080.1 | retrotransposon protein, putative, unclassified, expressed                                 | Chr9  | 21942005 | 21945283 + | 5  | 925  | 3.66 |
| LOC_Os08g39890.1 | OsSPL14 - SBP-box gene family member, expressed                                            | Chr8  | 25274449 | 25278696 - | 3  | 1812 | 3.66 |
| LOC_Os03g03590.1 | transporter, monovalent cation%3Aproton antiporter-2 family, putative, expressed           | Chr3  | 1567982  | 1571987 -  | 10 | 1724 | 3.66 |
| LOC_Os03g03590.2 | transporter, monovalent cation%3Aproton antiporter-2 family, putative, expressed           | Chr3  | 1567982  | 1571987 -  | 10 | 1712 | 3.66 |
| LOC_Os01g61120.1 | expressed protein                                                                          | Chr1  | 35386694 | 35391613 - | 7  | 2854 | 3.66 |
| LOC_Os12g02230.1 | expressed protein                                                                          | Chr12 | 692719   | 694659 +   | 2  | 1705 | 3.66 |
| LOC_Os02g42710.1 | C2 domain containing protein, putative, expressed                                          | Chr2  | 25684044 | 25687149 + | 5  | 1023 | 3.66 |
| LOC_Os04g38920.1 | DUF593 domain containing protein, expressed                                                | Chr4  | 23128561 | 23129976 + | 1  | 1448 | 3.66 |
| LOC_Os07g34950.2 | uncharacterized membrane protein, putative, expressed                                      | Chr7  | 20936091 | 20941654 + | 5  | 1874 | 3.66 |
| LOC_Os12g10670.1 | AAA-type ATPase family protein, putative, expressed                                        | Chr12 | 5703052  | 5708208 -  | 5  | 3685 | 3.66 |
| LOC_Os09g36180.1 | glycosyl transferase family 8 protein, expressed                                           | Chr9  | 20852282 | 20860971 - | 16 | 3755 | 3.66 |
| LOC_Os06g15390.1 | acylphosphatase, putative, expressed                                                       | Chr6  | 8745256  | 8746006 -  | 1  | 783  | 3.66 |
| LOC_Os02g33290.1 | expressed protein                                                                          | Chr2  | 19781759 | 19783563 + | 3  | 896  | 3.66 |
| LOC_Os01g55570.1 | expressed protein                                                                          | Chr1  | 32014398 | 32016278 + | 6  | 1054 | 3.66 |
| LOC_Os09g35740.1 | expressed protein                                                                          | Chr9  | 20557996 | 20559164 + | 2  | 1112 | 3.66 |
| LOC_Os01g55570.4 | expressed protein                                                                          | Chr1  | 32014398 | 32016278 + | 5  | 1151 | 3.66 |
| LOC_Os05g19470.7 | expressed protein                                                                          | Chr5  | 11314334 | 11317850 + | 2  | 1226 | 3.66 |
| LOC_Os03g19452.2 | SMP-30/Gluconolactonase/LRE domain protein, putative, expressed                            | Chr3  | 10942652 | 10944194 + | 2  | 1385 | 3.66 |
| LOC_Os03g19452.1 | SMP-30/Gluconolactonase/LRE domain protein, putative, expressed                            | Chr3  | 10939118 | 10944194 + | 2  | 1619 | 3.66 |
| LOC_Os08g15170.1 | ATP synthase epsilon chain, mitochondrial, putative, expressed                             | Chr8  | 9179588  | 9180385 -  | 3  | 411  | 3.66 |
| LOC_Os03g02762.1 | PPR repeat domain containing protein, putative, expressed                                  | Chr3  | 1076131  | 1079382 +  | 1  | 3284 | 3.66 |
| LOC_Os06g47600.1 | thaumatin family domain containing protein, expressed                                      | Chr6  | 28825830 | 28827036 + | 1  | 1239 | 3.66 |
| LOC_Os02g44975.1 | expressed protein                                                                          | Chr2  | 27241443 | 27242046 - | 3  | 509  | 3.66 |
| LOC_Os06g35030.2 | RNA recognition motif containing protein, putative, expressed                              | Chr6  | 20373809 | 20374723 + | 1  | 947  | 3.67 |
| LOC_Os03g17220.1 | dirigent, putative, expressed                                                              | Chr3  | 9599365  | 9601109 +  | 1  | 1777 | 3.67 |

|                  |                                                                                      |       |          |            |    |      |      |
|------------------|--------------------------------------------------------------------------------------|-------|----------|------------|----|------|------|
| LOC_Os03g36960.1 | expressed protein                                                                    | Chr3  | 20501317 | 20501926 - | 1  | 642  | 3.67 |
| LOC_Os06g47544.1 | expressed protein                                                                    | Chr6  | 28787764 | 28788344 + | 1  | 613  | 3.67 |
| LOC_Os06g30930.1 | expressed protein                                                                    | Chr6  | 17992999 | 17995414 + | 2  | 1438 | 3.67 |
| LOC_Os02g25650.1 | expressed protein                                                                    | Chr2  | 15000604 | 15004119 - | 7  | 698  | 3.67 |
| LOC_Os06g08540.1 | formin-like protein 13, putative, expressed                                          | Chr6  | 4224295  | 4228006 +  | 3  | 2362 | 3.68 |
| LOC_Os03g14450.2 | enolase, putative, expressed                                                         | Chr3  | 7847992  | 7851031 -  | 14 | 1864 | 3.68 |
| LOC_Os05g37160.1 | tubulin/FtsZ domain containing protein, putative, expressed                          | Chr5  | 21711920 | 21715654 - | 8  | 2255 | 3.68 |
| LOC_Os12g38860.1 | transposon protein, putative, unclassified, expressed                                | Chr12 | 23885347 | 23888965 - | 6  | 2981 | 3.68 |
| LOC_Os02g06180.1 | phytosulfokine receptor precursor, putative, expressed                               | Chr2  | 3084915  | 3087074 -  | 1  | 2192 | 3.69 |
| LOC_Os03g03860.2 | expressed protein                                                                    | Chr3  | 1737565  | 1741468 -  | 5  | 3113 | 3.69 |
| LOC_Os01g42620.2 | pentatricopeptide containing protein, putative, expressed                            | Chr1  | 24242458 | 24245152 - | 1  | 2727 | 3.69 |
| LOC_Os03g61030.1 | transcription termination factor nusG family protein, expressed                      | Chr3  | 34671286 | 34674494 + | 6  | 1591 | 3.69 |
| LOC_Os10g09870.2 | HVA22, putative, expressed                                                           | Chr10 | 5340966  | 5346885 -  | 7  | 1697 | 3.69 |
| LOC_Os06g21099.1 | expressed protein                                                                    | Chr6  | 12186508 | 12190658 + | 7  | 1712 | 3.69 |
| LOC_Os12g37380.1 | RNA pseudouridine synthase, putative, expressed                                      | Chr12 | 22948365 | 22951096 - | 2  | 1733 | 3.69 |
| LOC_Os09g30170.2 | F-box protein interaction domain containing protein, expressed                       | Chr9  | 18360671 | 18364013 + | 3  | 2843 | 3.69 |
| LOC_Os08g21630.1 | RAD23 protein, putative, expressed                                                   | Chr8  | 12883719 | 12884392 - | 2  | 331  | 3.69 |
| LOC_Os08g06280.8 | LSD1 zinc finger domain containing protein, expressed                                | Chr8  | 3460710  | 3464756 -  | 7  | 1268 | 3.69 |
| LOC_Os01g60820.1 | hypothetical protein                                                                 | Chr1  | 35171646 | 35172970 - | 3  | 687  | 3.69 |
| LOC_Os11g17240.1 | retrotransposon protein, putative, Ty3-gypsy subclass, expressed                     | Chr11 | 9603423  | 9604304 -  | 1  | 914  | 3.69 |
| LOC_Os07g14240.1 | retrotransposon protein, putative, Ty3-gypsy subclass                                | Chr7  | 8115727  | 8116696 +  | 1  | 1002 | 3.69 |
| LOC_Os07g35979.1 | expressed protein                                                                    | Chr7  | 21520374 | 21522072 - | 1  | 1731 | 3.70 |
| LOC_Os02g26550.1 | ubiquitin carboxyl-terminal hydrolase, family 1, putative, expressed                 | Chr2  | 15584117 | 15590536 + | 4  | 4512 | 3.70 |
| LOC_Os06g02400.1 | OsFBO18 - F-box and other domain containing protein, expressed                       | Chr6  | 825521   | 829063 +   | 3  | 2906 | 3.70 |
| LOC_Os06g38594.1 | expressed protein                                                                    | Chr6  | 22866810 | 22867521 - | 2  | 592  | 3.70 |
| LOC_Os07g27870.1 | thioesterase family protein, putative, expressed                                     | Chr7  | 16264709 | 16266597 + | 3  | 1074 | 3.70 |
| LOC_Os01g51330.1 | expressed protein                                                                    | Chr1  | 29521077 | 29523276 - | 2  | 1556 | 3.70 |
| LOC_Os04g39440.4 | ras-related protein, putative, expressed                                             | Chr4  | 23492935 | 23495366 + | 5  | 1674 | 3.70 |
| LOC_Os07g47370.1 | pentatricopeptide, putative, expressed                                               | Chr7  | 28335316 | 28337597 - | 1  | 2314 | 3.70 |
| LOC_Os01g74600.1 | vegetative storage protein, putative, expressed                                      | Chr1  | 43196120 | 43198668 + | 1  | 2581 | 3.70 |
| LOC_Os02g24626.1 | uncharacterized protein ycf70, putative                                              | Chr2  | 14282189 | 14282458 + | 1  | 302  | 3.70 |
| LOC_Os04g16878.1 | uncharacterized protein ycf70, putative                                              | Chr4  | 9181534  | 9181803 -  | 1  | 302  | 3.70 |
| LOC_Os03g40880.1 | retrotransposon protein, putative, unclassified, expressed                           | Chr3  | 22730603 | 22732967 - | 6  | 1893 | 3.70 |
| LOC_Os01g65940.1 | expressed protein                                                                    | Chr1  | 38283278 | 38286847 - | 7  | 2101 | 3.70 |
| LOC_Os05g14500.1 | expressed protein                                                                    | Chr5  | 8195720  | 8198339 +  | 4  | 2453 | 3.70 |
| LOC_Os01g23910.1 | expressed protein                                                                    | Chr1  | 13454908 | 13455887 - | 2  | 526  | 3.70 |
| LOC_Os11g34940.1 | plastid-specific 50S ribosomal protein 6, chloroplast precursor, putative, expressed | Chr11 | 20478176 | 20478870 - | 1  | 727  | 3.71 |
| LOC_Os04g08034.3 | ZOS4-02 - C2H2 zinc finger protein, expressed                                        | Chr4  | 4274958  | 4290697 +  | 22 | 3412 | 3.71 |
| LOC_Os12g24610.1 | retrotransposon protein, putative, unclassified, expressed                           | Chr12 | 14079278 | 14084899 + | 7  | 5144 | 3.71 |
| LOC_Os01g45360.1 | membrane associated DUF588 domain containing protein, putative, expressed            | Chr1  | 25748192 | 25750466 - | 3  | 1599 | 3.71 |
| LOC_Os01g63444.2 | expressed protein                                                                    | Chr1  | 36756897 | 36759008 + | 3  | 1609 | 3.71 |
| LOC_Os05g09650.1 | ubiquinone biosynthesis protein COQ4, putative, expressed                            | Chr5  | 5450104  | 5451973 +  | 3  | 967  | 3.71 |
| LOC_Os11g13670.1 | gibberellin receptor GID1L2, putative, expressed                                     | Chr11 | 7493921  | 7495461 -  | 1  | 1573 | 3.71 |
| LOC_Os02g26550.2 | ubiquitin carboxyl-terminal hydrolase, family 1, putative, expressed                 | Chr2  | 15584117 | 15590536 + | 4  | 4544 | 3.71 |
| LOC_Os11g35360.1 | actin polymerization factor, putative, expressed                                     | Chr11 | 20729532 | 20731541 + | 4  | 886  | 3.71 |

|                  |                                                                          |       |          |          |   |    |      |      |
|------------------|--------------------------------------------------------------------------|-------|----------|----------|---|----|------|------|
| LOC_Os11g35360.2 | actin polymerization factor, putative, expressed                         | Chr11 | 20729532 | 20731541 | + | 3  | 965  | 3.71 |
| LOC_Os03g29760.2 | nuclear transcription factor Y subunit, putative, expressed              | Chr3  | 16966586 | 16970772 | + | 6  | 1947 | 3.72 |
| LOC_Os02g01970.1 | expressed protein                                                        | Chr2  | 540108   | 547449   | + | 10 | 2867 | 3.72 |
| LOC_Os04g08034.1 | ZOS4-02 - C2H2 zinc finger protein, expressed                            | Chr4  | 4274885  | 4290697  | + | 22 | 3608 | 3.72 |
| LOC_Os06g08884.1 | expressed protein                                                        | Chr6  | 4468201  | 4470899  | - | 5  | 1886 | 3.72 |
| LOC_Os07g08890.1 | disease resistance protein RPM1, putative, expressed                     | Chr7  | 4618666  | 4622813  | + | 2  | 3233 | 3.72 |
| LOC_Os02g37950.3 | transposon protein, putative, unclassified, expressed                    | Chr2  | 22934130 | 22940327 | + | 6  | 5176 | 3.72 |
| LOC_Os03g02840.2 | remorin family protein, putative, expressed                              | Chr3  | 1109243  | 1112995  | - | 6  | 2471 | 3.73 |
| LOC_Os04g18030.2 | Sec1 family transport protein, putative, expressed                       | Chr4  | 9939614  | 9956327  | - | 23 | 3511 | 3.73 |
| LOC_Os04g18030.1 | Sec1 family transport protein, putative, expressed                       | Chr4  | 9939614  | 9956327  | - | 22 | 3554 | 3.73 |
| LOC_Os04g18030.4 | Sec1 family transport protein, putative, expressed                       | Chr4  | 9939614  | 9956327  | - | 22 | 3564 | 3.73 |
| LOC_Os04g18030.3 | Sec1 family transport protein, putative, expressed                       | Chr4  | 9939540  | 9956327  | - | 24 | 3515 | 3.73 |
| LOC_Os04g46860.1 | scarecrow, putative, expressed                                           | Chr4  | 27764666 | 27767328 | + | 1  | 2695 | 3.73 |
| LOC_Os09g12730.2 | RNA recognition motif containing protein, expressed                      | Chr9  | 7293011  | 7300555  | - | 5  | 3634 | 3.73 |
| LOC_Os09g12730.1 | RNA recognition motif containing protein, expressed                      | Chr9  | 7293011  | 7300542  | - | 5  | 3614 | 3.73 |
| LOC_Os02g37950.1 | transposon protein, putative, unclassified, expressed                    | Chr2  | 22934104 | 22940104 | + | 5  | 5129 | 3.73 |
| LOC_Os12g01580.1 | MATE efflux protein, putative, expressed                                 | Chr12 | 350766   | 355106   | + | 12 | 2457 | 3.73 |
| LOC_Os12g01580.2 | MATE efflux protein, putative, expressed                                 | Chr12 | 350767   | 355106   | + | 12 | 2445 | 3.73 |
| LOC_Os04g21110.1 | phosphoribulokinase/Uridine kinase family protein, expressed             | Chr4  | 11869125 | 11887514 | + | 26 | 4235 | 3.73 |
| LOC_Os01g49020.1 | expressed protein                                                        | Chr1  | 28166404 | 28167210 | - | 2  | 760  | 3.74 |
| LOC_Os06g02240.1 | RNA recognition motif containing protein, putative, expressed            | Chr6  | 699044   | 702212   | + | 5  | 1425 | 3.74 |
| LOC_Os01g29150.1 | cytochrome P450 72A1, putative, expressed                                | Chr1  | 16325487 | 16328374 | - | 4  | 2271 | 3.74 |
| LOC_Os03g03540.1 | no apical meristem protein, putative, expressed                          | Chr3  | 1528969  | 1531624  | - | 3  | 1495 | 3.74 |
| LOC_Os08g04240.1 | cysteine-rich repeat secretory protein 55 precursor, putative, expressed | Chr8  | 2063156  | 2064909  | - | 2  | 1446 | 3.74 |
| LOC_Os02g57500.1 | expressed protein                                                        | Chr2  | 35230702 | 35233962 | - | 5  | 1783 | 3.74 |
| LOC_Os03g02840.3 | remorin family protein, putative, expressed                              | Chr3  | 1109242  | 1112995  | - | 5  | 2539 | 3.74 |
| LOC_Os06g49040.1 | Myb-like DNA-binding domain containing protein, putative, expressed      | Chr6  | 29723457 | 29727122 | + | 8  | 2193 | 3.75 |
| LOC_Os04g58630.3 | DNA mismatch repair protein MSH3, putative, expressed                    | Chr4  | 34873439 | 34877172 | - | 6  | 2367 | 3.75 |
| LOC_Os02g46810.1 | amino acid transporter, putative, expressed                              | Chr2  | 28574011 | 28574592 | - | 2  | 541  | 3.75 |
| LOC_Os11g39618.1 | expressed protein                                                        | Chr11 | 23578838 | 23580982 | + | 6  | 969  | 3.75 |
| LOC_Os01g65610.1 | expressed protein                                                        | Chr1  | 38088282 | 38094202 | + | 9  | 1930 | 3.75 |
| LOC_Os04g39280.1 | ATPOT1, putative, expressed                                              | Chr4  | 23367246 | 23372741 | - | 11 | 2934 | 3.75 |
| LOC_Os05g40790.2 | CCR4-NOT transcription factor, putative, expressed                       | Chr5  | 23916372 | 23923564 | + | 16 | 2991 | 3.75 |
| LOC_Os05g40890.2 | expressed protein                                                        | Chr5  | 23978509 | 23979761 | + | 3  | 1024 | 3.75 |
| LOC_Os11g06234.1 | expressed protein                                                        | Chr11 | 2983174  | 2984969  | + | 1  | 1828 | 3.75 |
| LOC_Os12g10320.1 | plant-specific domain TIGR01627 family protein, expressed                | Chr12 | 5455273  | 5457079  | - | 1  | 1839 | 3.75 |
| LOC_Os11g09670.1 | OsFBX409 - F-box domain containing protein, expressed                    | Chr11 | 5164432  | 5166686  | - | 5  | 1794 | 3.75 |
| LOC_Os11g09670.2 | OsFBX409 - F-box domain containing protein, expressed                    | Chr11 | 5164432  | 5166686  | - | 4  | 1879 | 3.75 |
| LOC_Os12g34390.1 | expressed protein                                                        | Chr12 | 20847972 | 20849838 | - | 4  | 1397 | 3.75 |
| LOC_Os01g11240.1 | DUF538 domain containing protein, putative, expressed                    | Chr1  | 6010736  | 6011894  | - | 1  | 1191 | 3.75 |
| LOC_Os11g31880.1 | phosphoglycerate mutase, putative, expressed                             | Chr11 | 18728970 | 18733435 | + | 2  | 1682 | 3.75 |
| LOC_Os07g09040.1 | peptidyl-prolyl cis-trans isomerase, FKBP-type, putative, expressed      | Chr7  | 4721767  | 4727024  | + | 9  | 2126 | 3.75 |
| LOC_Os07g32600.1 | glucan endo-1,3-beta-glucosidase precursor, putative, expressed          | Chr7  | 19436899 | 19442776 | + | 4  | 2059 | 3.75 |
| LOC_Os03g14850.1 | OsMADS72 - MADS-box family gene with M-alpha type-box, expressed         | Chr3  | 8096539  | 8098764  | - | 2  | 1405 | 3.75 |
| LOC_Os04g31290.1 | helix-loop-helix DNA-binding domain containing protein, expressed        | Chr4  | 18720466 | 18722735 | + | 3  | 1494 | 3.75 |

|                  |                                                                                   |       |          |            |    |      |      |
|------------------|-----------------------------------------------------------------------------------|-------|----------|------------|----|------|------|
| LOC_Os06g01710.1 | expressed protein                                                                 | Chr6  | 416531   | 420160 -   | 3  | 972  | 3.76 |
| LOC_Os09g25410.1 | expressed protein                                                                 | Chr9  | 15233373 | 15236004 + | 4  | 2122 | 3.76 |
| LOC_Os01g68970.1 | HYS1, putative, expressed                                                         | Chr1  | 40070773 | 40073764 - | 5  | 2067 | 3.76 |
| LOC_Os01g68970.3 | HYS1, putative, expressed                                                         | Chr1  | 40070773 | 40073754 - | 5  | 2087 | 3.76 |
| LOC_Os01g22480.1 | OsFBDUF4 - F-box and DUF domain containing protein, expressed                     | Chr1  | 12636443 | 12640675 - | 3  | 3946 | 3.76 |
| LOC_Os12g39320.1 | DUF221 domain containing protein, expressed                                       | Chr12 | 24191441 | 24197634 + | 10 | 2925 | 3.77 |
| LOC_Os09g28730.1 | gibberellin receptor GID1L2, putative, expressed                                  | Chr9  | 17460636 | 17462070 - | 1  | 1467 | 3.77 |
| LOC_Os07g39320.1 | homeobox domain containing protein, expressed                                     | Chr7  | 23559520 | 23560868 + | 3  | 1240 | 3.77 |
| LOC_Os01g51370.1 | expressed protein                                                                 | Chr1  | 29534964 | 29536164 - | 3  | 988  | 3.77 |
| LOC_Os02g40514.1 | h/ACA ribonucleoprotein complex subunit 3, putative, expressed                    | Chr2  | 24573390 | 24575344 - | 4  | 822  | 3.78 |
| LOC_Os02g40514.2 | h/ACA ribonucleoprotein complex subunit 3, putative, expressed                    | Chr2  | 24573390 | 24575337 - | 3  | 898  | 3.78 |
| LOC_Os06g35020.1 | expressed protein                                                                 | Chr6  | 20365071 | 20370995 + | 8  | 1000 | 3.78 |
| LOC_Os02g30240.1 | expressed protein                                                                 | Chr2  | 17981503 | 17982535 - | 1  | 1065 | 3.78 |
| LOC_Os04g15670.1 | expressed protein                                                                 | Chr4  | 8518633  | 8519259 +  | 1  | 659  | 3.78 |
| LOC_Os10g30520.1 | ras-related protein, putative, expressed                                          | Chr10 | 15869292 | 15873575 + | 8  | 1387 | 3.78 |
| LOC_Os10g02770.1 | glycosyl hydrolases family 16, putative, expressed                                | Chr10 | 1092789  | 1096966 -  | 4  | 1798 | 3.78 |
| LOC_Os04g28820.1 | retrotransposon protein, putative, unclassified, expressed                        | Chr4  | 17063617 | 17070532 - | 7  | 6473 | 3.78 |
| LOC_Os06g24711.1 | expressed protein                                                                 | Chr6  | 14515712 | 14516665 + | 1  | 986  | 3.79 |
| LOC_Os01g33020.1 | trafficking protein particle complex subunit 1, putative, expressed               | Chr1  | 18135292 | 18138335 - | 5  | 1088 | 3.79 |
| LOC_Os01g33020.2 | trafficking protein particle complex subunit 1, putative, expressed               | Chr1  | 18135288 | 18138335 - | 5  | 1089 | 3.79 |
| LOC_Os02g03270.1 | AT hook motif domain containing protein, expressed                                | Chr2  | 1313910  | 1319031 +  | 5  | 2018 | 3.79 |
| LOC_Os11g06200.1 | expressed protein                                                                 | Chr11 | 2961458  | 2965668 +  | 7  | 1112 | 3.79 |
| LOC_Os06g05530.1 | RNA recognition motif containing protein, putative, expressed                     | Chr6  | 2505622  | 2509040 -  | 6  | 1260 | 3.79 |
| LOC_Os06g05530.2 | RNA recognition motif containing protein, putative, expressed                     | Chr6  | 2505622  | 2509040 -  | 5  | 1313 | 3.79 |
| LOC_Os06g05530.3 | RNA recognition motif containing protein, putative, expressed                     | Chr6  | 2505590  | 2509040 -  | 5  | 1340 | 3.79 |
| LOC_Os02g46210.1 | DUF581 domain containing protein, expressed                                       | Chr2  | 28153272 | 28154641 - | 2  | 1284 | 3.79 |
| LOC_Os01g48650.1 | expressed protein                                                                 | Chr1  | 27888052 | 27894271 - | 8  | 1708 | 3.79 |
| LOC_Os01g57120.1 | transposon protein, putative, unclassified                                        | Chr1  | 33015925 | 33020218 - | 8  | 2917 | 3.79 |
| LOC_Os01g03950.1 | glycosyl hydrolase, family 31, putative, expressed                                | Chr1  | 1698203  | 1703090 +  | 3  | 3581 | 3.79 |
| LOC_Os06g36710.1 | transposon protein, putative, CACTA, En/Spm sub-class, expressed                  | Chr6  | 21614166 | 21617120 - | 6  | 1867 | 3.79 |
| LOC_Os11g47930.1 | alpha-hemolysin, putative, expressed                                              | Chr11 | 28901999 | 28904573 - | 6  | 723  | 3.79 |
| LOC_Os10g28350.1 | 1,2-dihydroxy-3-keto-5-methylthiopentene dioxygenase protein, putative, expressed | Chr10 | 14751950 | 14754326 - | 7  | 1167 | 3.79 |
| LOC_Os02g32930.1 | bile acid sodium symporter, putative, expressed                                   | Chr2  | 19549723 | 19556503 + | 14 | 2403 | 3.79 |
| LOC_Os10g04342.1 | stripe rust resistance protein Yr10, putative, expressed                          | Chr10 | 2044042  | 2057559 -  | 2  | 3183 | 3.79 |
| LOC_Os12g25494.2 | transposon protein, putative, unclassified, expressed                             | Chr12 | 14754305 | 14757989 - | 2  | 772  | 3.79 |
| LOC_Os11g10040.3 | mTERF family protein, expressed                                                   | Chr11 | 5372635  | 5375608 +  | 3  | 1706 | 3.79 |
| LOC_Os05g40790.1 | CCR4-NOT transcription factor, putative, expressed                                | Chr5  | 23916372 | 23923564 + | 16 | 3024 | 3.79 |
| LOC_Os11g40249.2 | expressed protein                                                                 | Chr11 | 24001622 | 24010494 + | 5  | 4725 | 3.79 |
| LOC_Os11g03050.1 | cytidyltransferase domain containing protein, expressed                           | Chr11 | 1071346  | 1076828 -  | 9  | 2159 | 3.79 |
| LOC_Os04g54740.2 | expressed protein                                                                 | Chr4  | 32552399 | 32556312 + | 3  | 653  | 3.79 |
| LOC_Os06g21680.1 | expressed protein                                                                 | Chr6  | 12513741 | 12514685 - | 2  | 715  | 3.79 |
| LOC_Os06g10100.1 | expressed protein                                                                 | Chr6  | 5143278  | 5144540 +  | 1  | 1295 | 3.79 |
| LOC_Os08g05830.4 | transaldolase, putative, expressed                                                | Chr8  | 3130322  | 3132240 -  | 6  | 1616 | 3.79 |
| LOC_Os06g12539.1 | expressed protein                                                                 | Chr6  | 6796598  | 6798469 +  | 1  | 1904 | 3.79 |
| LOC_Os11g43860.1 | sodium/calcium exchanger protein, putative, expressed                             | Chr11 | 26488372 | 26492383 - | 9  | 2303 | 3.79 |

|                  |                                                                                                       |       |          |            |    |      |      |
|------------------|-------------------------------------------------------------------------------------------------------|-------|----------|------------|----|------|------|
| LOC_Os05g41150.1 | expressed protein                                                                                     | Chr5  | 24103645 | 24106552 - | 2  | 2626 | 3.79 |
| LOC_Os03g05800.2 | expressed protein                                                                                     | Chr3  | 2898094  | 2900274 -  | 4  | 912  | 3.79 |
| LOC_Os03g10870.1 | membrane associated DUF588 domain containing protein, putative, expressed                             | Chr3  | 5586002  | 5588859 +  | 3  | 1043 | 3.79 |
| LOC_Os05g49390.1 | expressed protein                                                                                     | Chr5  | 28320165 | 28325897 - | 11 | 1690 | 3.79 |
| LOC_Os01g70410.1 | protein kinase, putative, expressed                                                                   | Chr1  | 40786166 | 40790612 - | 9  | 2610 | 3.79 |
| LOC_Os01g70410.3 | protein kinase, putative, expressed                                                                   | Chr1  | 40786166 | 40790611 - | 9  | 2687 | 3.79 |
| LOC_Os01g70410.2 | protein kinase, putative, expressed                                                                   | Chr1  | 40786166 | 40790609 - | 8  | 2726 | 3.79 |
| LOC_Os03g06350.1 | DUF623 domain containing protein, expressed                                                           | Chr3  | 3178092  | 3179590 -  | 1  | 1531 | 3.79 |
| LOC_Os07g37110.1 | nucleoside transporter, putative, expressed                                                           | Chr7  | 22236821 | 22240341 - | 12 | 2901 | 3.80 |
| LOC_Os10g30300.1 | TRM112, putative, expressed                                                                           | Chr10 | 15737581 | 15739397 + | 3  | 636  | 3.80 |
| LOC_Os03g21999.1 | expressed protein                                                                                     | Chr3  | 12606058 | 12608766 - | 3  | 1330 | 3.80 |
| LOC_Os06g25930.1 | retrotransposon protein, putative, unclassified, expressed                                            | Chr6  | 15177967 | 15180110 + | 2  | 1774 | 3.80 |
| LOC_Os05g38720.1 | Lung seven transmembrane receptor domain containing protein, putative, expressed                      | Chr5  | 22719262 | 22721316 + | 1  | 2087 | 3.80 |
| LOC_Os07g29220.1 | Cyclopropane-fatty-acyl-phospholipid synthase, putative, expressed                                    | Chr7  | 17115809 | 17120425 + | 12 | 2199 | 3.80 |
| LOC_Os03g60740.1 | expressed protein                                                                                     | Chr3  | 34526481 | 34529102 - | 7  | 1338 | 3.80 |
| LOC_Os09g36910.1 | bZIP transcription factor domain containing protein, expressed                                        | Chr9  | 21291988 | 21293452 + | 2  | 1385 | 3.80 |
| LOC_Os05g44330.4 | DJ-1 family protein, putative, expressed                                                              | Chr5  | 25796297 | 25800798 + | 5  | 1416 | 3.80 |
| LOC_Os04g16710.1 | retrotransposon protein, putative, Ty3-gypsy subclass                                                 | Chr4  | 9088838  | 9089491 -  | 1  | 686  | 3.80 |
| LOC_Os01g08310.1 | serine/threonine protein phosphatase 2A 59 kDa regulatory subunit Bgamma isoform, putative, expressed | Chr1  | 4068617  | 4070372 -  | 2  | 969  | 3.80 |
| LOC_Os09g36010.1 | expressed protein                                                                                     | Chr9  | 20743156 | 20744337 + | 2  | 1000 | 3.80 |
| LOC_Os05g43174.1 | expressed protein                                                                                     | Chr5  | 25063389 | 25064011 + | 1  | 655  | 3.80 |
| LOC_Os01g64262.1 | hydrolase, alpha/beta fold family, putative, expressed                                                | Chr1  | 37310829 | 37314736 - | 5  | 1525 | 3.80 |
| LOC_Os07g47300.1 | spoOB-associated GTP-binding protein, putative, expressed                                             | Chr7  | 28277520 | 28281063 + | 6  | 2862 | 3.80 |
| LOC_Os09g33992.2 | expressed protein                                                                                     | Chr9  | 20070523 | 20073652 - | 6  | 1710 | 3.80 |
| LOC_Os09g33992.1 | expressed protein                                                                                     | Chr9  | 20070523 | 20073652 - | 4  | 1912 | 3.80 |
| LOC_Os03g05690.1 | ZOS3-03 - C2H2 zinc finger protein, expressed                                                         | Chr3  | 2838772  | 2841691 +  | 2  | 2680 | 3.80 |
| LOC_Os12g01220.1 | expressed protein                                                                                     | Chr12 | 127749   | 133489 -   | 12 | 4004 | 3.81 |
| LOC_Os04g33700.1 | ABC transmembrane transporter domain containing protein, expressed                                    | Chr4  | 20406006 | 20410406 - | 10 | 2369 | 3.81 |
| LOC_Os01g04990.1 | mitochondrial carrier protein, putative, expressed                                                    | Chr1  | 2349919  | 2353502 -  | 7  | 1723 | 3.81 |
| LOC_Os01g04990.2 | mitochondrial carrier protein, putative, expressed                                                    | Chr1  | 2349919  | 2353502 -  | 7  | 1686 | 3.81 |
| LOC_Os08g17870.1 | reticulon domain containing protein, putative, expressed                                              | Chr8  | 10960042 | 10967308 + | 14 | 2913 | 3.81 |
| LOC_Os01g51390.1 | mitochondrial-processing peptidase subunit, mitochondrial precursor, putative, expressed              | Chr1  | 29544661 | 29548524 + | 9  | 2141 | 3.82 |
| LOC_Os01g61250.1 | methyltransferase, putative, expressed                                                                | Chr1  | 35436701 | 35441737 + | 8  | 2778 | 3.82 |
| LOC_Os01g66600.1 | rhodanese-like, putative, expressed                                                                   | Chr1  | 38684423 | 38688097 - | 4  | 1653 | 3.82 |
| LOC_Os05g33270.1 | GDSL-like lipase/acylhydrolase, putative, expressed                                                   | Chr5  | 19502924 | 19507400 + | 5  | 1914 | 3.82 |
| LOC_Os01g51020.1 | 60S ribosomal protein L28-1, putative, expressed                                                      | Chr1  | 29314183 | 29316912 + | 4  | 920  | 3.82 |
| LOC_Os08g33330.1 | protein kinase PKN/PRK1, effector, putative, expressed                                                | Chr8  | 20790427 | 20794816 + | 4  | 1777 | 3.82 |
| LOC_Os06g21068.1 | retrotransposon protein, putative, Ty3-gypsy subclass                                                 | Chr6  | 12173317 | 12175252 - | 3  | 966  | 3.82 |
| LOC_Os06g05804.1 | trafficking protein particle complex subunit 4, putative, expressed                                   | Chr6  | 2642290  | 2645168 -  | 4  | 1056 | 3.82 |
| LOC_Os06g05804.2 | trafficking protein particle complex subunit 4, putative, expressed                                   | Chr6  | 2642290  | 2645274 -  | 4  | 1139 | 3.82 |
| LOC_Os06g05804.3 | trafficking protein particle complex subunit 4, putative, expressed                                   | Chr6  | 2642290  | 2645274 -  | 4  | 1162 | 3.82 |
| LOC_Os06g05804.4 | trafficking protein particle complex subunit 4, putative, expressed                                   | Chr6  | 2642290  | 2645274 -  | 3  | 1186 | 3.82 |
| LOC_Os08g36010.1 | OsFBX295 - F-box domain containing protein, expressed                                                 | Chr8  | 22692351 | 22694354 - | 3  | 1662 | 3.82 |
| LOC_Os01g61150.1 | phox domain-containing protein, putative, expressed                                                   | Chr1  | 35396166 | 35400248 - | 5  | 2286 | 3.82 |
| LOC_Os07g05084.1 | expressed protein                                                                                     | Chr7  | 2243674  | 2245570 +  | 3  | 581  | 3.83 |

|                        |                                                                                                |       |          |          |   |    |      |      |
|------------------------|------------------------------------------------------------------------------------------------|-------|----------|----------|---|----|------|------|
| LOC_Os01g05840.2       | oxidoreductase, short chain dehydrogenase/reductase family domain containing family, expressed | Chr1  | 2800436  | 2803742  | + | 9  | 1703 | 3.83 |
| LOC_Os01g05840.1       | oxidoreductase, short chain dehydrogenase/reductase family domain containing family, expressed | Chr1  | 2800504  | 2803742  | + | 8  | 1737 | 3.83 |
| LOC_Os02g10120.1       | lipoxygenase, putative, expressed                                                              | Chr2  | 5276620  | 5282626  | - | 6  | 3416 | 3.83 |
| LOC_Os12g32380.1       | 40S ribosomal protein S29, putative, expressed                                                 | Chr12 | 19536726 | 19541133 | + | 4  | 440  | 3.83 |
| LOC_Os01g26970.4       | expressed protein                                                                              | Chr1  | 15021073 | 15023907 | - | 5  | 1172 | 3.83 |
| LOC_Os10g27470.1       | KH domain containing protein, putative, expressed                                              | Chr10 | 14487133 | 14493136 | + | 7  | 2499 | 3.83 |
| LOC_Os03g01790.1       | zinc finger, C3HC4 type domain containing protein, expressed                                   | Chr3  | 488489   | 492440   | + | 12 | 2058 | 3.83 |
| LOC_Os01g60430.1       | pentatricopeptide repeat-containing protein, putative, expressed                               | Chr1  | 34946618 | 34949027 | + | 1  | 2442 | 3.83 |
| LOC_Os03g53770.1       | RNA recognition motif containing protein, putative, expressed                                  | Chr3  | 30825413 | 30828133 | + | 8  | 1096 | 3.83 |
| LOC_Os08g35710.1       | expressed protein                                                                              | Chr8  | 22530040 | 22532479 | - | 2  | 1248 | 3.83 |
| LOC_Os04g53330.2       | RNA recognition motif containing protein, putative, expressed                                  | Chr4  | 31764133 | 31766856 | - | 5  | 1586 | 3.83 |
| LOC_Os04g53330.1       | RNA recognition motif containing protein, putative, expressed                                  | Chr4  | 31764126 | 31766854 | - | 5  | 1595 | 3.83 |
| LOC_Os03g01760.2       | exostosin family domain containing protein, expressed                                          | Chr3  | 479167   | 482008   | + | 3  | 1977 | 3.83 |
| LOC_Os03g01760.1       | exostosin family domain containing protein, expressed                                          | Chr3  | 479167   | 482008   | + | 3  | 1982 | 3.83 |
| LOC_Os06g38770.1       | expressed protein                                                                              | Chr6  | 23016236 | 23017252 | - | 4  | 589  | 3.83 |
| LOC_Os04g38770.1       | OsMADS61 - MADS-box family gene with MIKCC type-box, expressed                                 | Chr4  | 23040160 | 23041485 | + | 3  | 623  | 3.83 |
| ChrSy.fgenes.h.mRNA.74 | expressed protein                                                                              | ChrSy | 511465   | 512934   | + | 1  | 1502 | 3.83 |
| LOC_Os02g22580.1       | expressed protein                                                                              | Chr2  | 13467197 | 13467584 | - | 3  | 318  | 3.83 |
| LOC_Os08g10870.1       | hypothetical protein                                                                           | Chr8  | 6399879  | 6403752  | + | 6  | 603  | 3.83 |
| LOC_Os09g06220.1       | retrotransposon protein, putative, unclassified, expressed                                     | Chr9  | 2905168  | 2912471  | - | 11 | 2278 | 3.83 |
| LOC_Os02g58300.1       | expressed protein                                                                              | Chr2  | 35674797 | 35676431 | - | 1  | 1667 | 3.83 |
| LOC_Os03g53640.1       | expressed protein                                                                              | Chr3  | 30755791 | 30757510 | - | 3  | 1076 | 3.83 |
| LOC_Os01g46950.1       | aldose 1-epimerase, putative, expressed                                                        | Chr1  | 26791754 | 26795939 | - | 8  | 2155 | 3.83 |
| LOC_Os09g39620.1       | protein kinase family protein, putative, expressed                                             | Chr9  | 22736559 | 22741162 | + | 9  | 2865 | 3.83 |
| LOC_Os12g18800.1       | transposon protein, putative, unclassified, expressed                                          | Chr12 | 10885484 | 10888535 | - | 7  | 1916 | 3.83 |
| LOC_Os07g40700.1       | RNA methyltransferase, TrmH family protein, putative, expressed                                | Chr7  | 24389154 | 24393592 | + | 6  | 1918 | 3.83 |
| LOC_Os12g42739.1       | expressed protein                                                                              | Chr12 | 26560942 | 26562032 | - | 3  | 1004 | 3.83 |
| LOC_Os02g35700.3       | nucleoside diphosphate kinase, putative, expressed                                             | Chr2  | 21453117 | 21454141 | + | 2  | 650  | 3.83 |
| LOC_Os12g34880.1       | expressed protein                                                                              | Chr12 | 21238232 | 21239733 | - | 2  | 884  | 3.83 |
| LOC_Os03g59880.1       | expressed protein                                                                              | Chr3  | 34088936 | 34090111 | + | 2  | 1041 | 3.83 |
| LOC_Os02g51810.2       | expressed protein                                                                              | Chr2  | 31739493 | 31744666 | + | 9  | 2025 | 3.83 |
| LOC_Os06g04250.1       | phosphate-induced protein 1 conserved region domain containing protein, expressed              | Chr6  | 1789836  | 1791394  | + | 1  | 1591 | 3.84 |
| LOC_Os01g30950.1       | retrotransposon protein, putative, unclassified, expressed                                     | Chr1  | 16887541 | 16889687 | + | 2  | 1774 | 3.84 |
| LOC_Os01g29110.1       | retrotransposon protein, putative, unclassified, expressed                                     | Chr1  | 16306512 | 16309782 | - | 4  | 1865 | 3.84 |
| LOC_Os07g08420.1       | bZIP transcription factor domain containing protein, expressed                                 | Chr7  | 4322231  | 4326708  | - | 6  | 1971 | 3.84 |
| LOC_Os10g41250.1       | glycoprotein, putative, expressed                                                              | Chr10 | 22166887 | 22168850 | - | 1  | 1996 | 3.84 |
| LOC_Os09g14810.1       | retrotransposon protein, putative, unclassified, expressed                                     | Chr9  | 8819282  | 8822215  | - | 3  | 2517 | 3.84 |
| LOC_Os12g07110.1       | acyl-CoA synthetase protein, putative, expressed                                               | Chr12 | 3483864  | 3489371  | + | 12 | 3169 | 3.84 |
| LOC_Os12g07110.2       | acyl-CoA synthetase protein, putative, expressed                                               | Chr12 | 3483918  | 3489371  | + | 11 | 3891 | 3.84 |
| LOC_Os02g14874.1       | expressed protein                                                                              | Chr2  | 8276806  | 8278503  | + | 2  | 1636 | 3.84 |
| LOC_Os05g44330.3       | DJ-1 family protein, putative, expressed                                                       | Chr5  | 25796297 | 25800798 | + | 7  | 1810 | 3.84 |
| LOC_Os05g35266.1       | galactosyltransferase, putative, expressed                                                     | Chr5  | 20944786 | 20947148 | - | 7  | 2049 | 3.84 |
| LOC_Os05g35266.3       | galactosyltransferase, putative, expressed                                                     | Chr5  | 20944786 | 20947128 | - | 6  | 2100 | 3.84 |
| LOC_Os06g29650.1       | CDP-diacylglycerol--inositol 3-phosphatidyltransferase 1, putative, expressed                  | Chr6  | 17003628 | 17010230 | - | 9  | 1727 | 3.84 |
| LOC_Os06g29650.2       | CDP-diacylglycerol--inositol 3-phosphatidyltransferase 1, putative, expressed                  | Chr6  | 17003628 | 17010231 | - | 8  | 1611 | 3.84 |



|                  |                                                                           |       |          |          |   |    |      |      |
|------------------|---------------------------------------------------------------------------|-------|----------|----------|---|----|------|------|
| LOC_Os04g31690.1 | expressed protein                                                         | Chr4  | 18984846 | 18987232 | + | 5  | 712  | 3.84 |
| LOC_Os08g08100.1 | expressed protein                                                         | Chr8  | 4595778  | 4597522  | + | 4  | 956  | 3.84 |
| LOC_Os12g10720.3 | glutathione S-transferase, putative, expressed                            | Chr12 | 5756467  | 5758873  | + | 7  | 810  | 3.84 |
| LOC_Os12g34860.2 | phenylalanyl-tRNA synthetase, putative, expressed                         | Chr12 | 21220797 | 21222566 | + | 3  | 1168 | 3.84 |
| LOC_Os06g12720.1 | retrotransposon protein, putative, unclassified, expressed                | Chr6  | 6945033  | 6947818  | - | 7  | 2576 | 3.84 |
| LOC_Os06g49780.1 | expressed protein                                                         | Chr6  | 30117740 | 30118771 | + | 1  | 1064 | 3.84 |
| LOC_Os03g19010.1 | peroxisomal biogenesis factor 11, putative, expressed                     | Chr3  | 10647659 | 10648869 | + | 1  | 1243 | 3.84 |
| LOC_Os06g38760.1 | retrotransposon protein, putative, unclassified, expressed                | Chr6  | 23005341 | 23011471 | + | 5  | 3775 | 3.84 |
| LOC_Os10g09870.1 | HVA22, putative, expressed                                                | Chr10 | 5340966  | 5346885  | - | 7  | 1803 | 3.84 |
| LOC_Os10g09870.4 | HVA22, putative, expressed                                                | Chr10 | 5340966  | 5346885  | - | 7  | 1796 | 3.84 |
| LOC_Os07g41230.1 | esterase, putative, expressed                                             | Chr7  | 24699495 | 24703794 | + | 5  | 1766 | 3.85 |
| LOC_Os07g37790.1 | expressed protein                                                         | Chr7  | 22659562 | 22663678 | + | 11 | 1559 | 3.85 |
| LOC_Os10g21196.1 | chloroplast 30S ribosomal protein S16, putative, expressed                | Chr10 | 10811681 | 10812748 | - | 2  | 253  | 3.85 |
| LOC_Os05g46710.2 | expressed protein                                                         | Chr5  | 27036918 | 27039220 | - | 4  | 903  | 3.85 |
| LOC_Os06g39728.1 | cytochrome b559 subunit alpha, putative                                   | Chr6  | 23580417 | 23580668 | + | 1  | 284  | 3.85 |
| LOC_Os03g08740.2 | expressed protein                                                         | Chr3  | 4513398  | 4518535  | + | 4  | 4083 | 3.86 |
| LOC_Os08g37260.2 | expressed protein                                                         | Chr8  | 23551865 | 23556346 | - | 4  | 1751 | 3.86 |
| LOC_Os03g52720.1 | magnesium-dependent phosphatase 1, putative, expressed                    | Chr3  | 30224157 | 30226365 | - | 4  | 930  | 3.86 |
| LOC_Os05g39560.1 | metal cation transporter, putative, expressed                             | Chr5  | 23216413 | 23219283 | + | 3  | 1905 | 3.86 |
| LOC_Os06g49460.1 | Rer1 protein, putative, expressed                                         | Chr6  | 29967952 | 29970514 | + | 3  | 1325 | 3.86 |
| LOC_Os02g02800.1 | AGAP001222-PA, putative, expressed                                        | Chr2  | 1067025  | 1069448  | + | 7  | 1631 | 3.87 |
| LOC_Os02g49130.1 | expressed protein                                                         | Chr2  | 30044219 | 30047532 | - | 3  | 836  | 3.87 |
| LOC_Os01g73300.1 | VAMP-like protein YKT62, putative, expressed                              | Chr1  | 42479663 | 42483372 | - | 6  | 1312 | 3.87 |
| LOC_Os02g53680.1 | RPA1A - Putative single-stranded DNA binding complex subunit 1, expressed | Chr2  | 32832832 | 32836481 | - | 2  | 2655 | 3.87 |
| LOC_Os08g29520.1 | cytochrome b561, putative, expressed                                      | Chr8  | 18098755 | 18102913 | + | 4  | 1257 | 3.87 |
| LOC_Os05g41670.1 | ICE-like protease p20 domain containing protein, putative, expressed      | Chr5  | 24384901 | 24387468 | - | 2  | 1683 | 3.87 |
| LOC_Os04g51440.1 | villin protein, putative, expressed                                       | Chr4  | 30463864 | 30473000 | - | 23 | 4038 | 3.87 |
| LOC_Os04g51440.2 | villin protein, putative, expressed                                       | Chr4  | 30463864 | 30472877 | - | 22 | 4088 | 3.87 |
| LOC_Os03g08740.1 | expressed protein                                                         | Chr3  | 4513398  | 4518535  | + | 4  | 4141 | 3.87 |
| LOC_Os07g14100.1 | pentatricopeptide, putative, expressed                                    | Chr7  | 8043463  | 8045191  | - | 1  | 1761 | 3.87 |
| LOC_Os03g62040.1 | retrotransposon protein, putative, unclassified, expressed                | Chr3  | 35150338 | 35153150 | + | 3  | 2646 | 3.87 |
| LOC_Os01g72900.1 | abscisic stress-ripening, putative, expressed                             | Chr1  | 42281272 | 42281973 | - | 2  | 635  | 3.87 |
| LOC_Os10g24340.1 | expressed protein                                                         | Chr10 | 12473756 | 12474871 | + | 3  | 789  | 3.87 |
| LOC_Os02g33290.2 | expressed protein                                                         | Chr2  | 19781835 | 19783603 | + | 2  | 1671 | 3.87 |
| LOC_Os12g07270.1 | bile acid sodium symporter family protein, putative, expressed            | Chr12 | 3573433  | 3576997  | - | 7  | 1683 | 3.87 |
| LOC_Os03g04590.2 | ribosomal protein, putative, expressed                                    | Chr3  | 2142725  | 2143944  | + | 2  | 1157 | 3.87 |
| LOC_Os05g33320.1 | expressed protein                                                         | Chr5  | 19531187 | 19533381 | - | 2  | 976  | 3.87 |
| LOC_Os08g18760.1 | retrotransposon protein, putative, unclassified, expressed                | Chr8  | 11198143 | 11199138 | + | 1  | 1028 | 3.87 |
| LOC_Os11g10040.1 | mTERF family protein, expressed                                           | Chr11 | 5372635  | 5375530  | + | 2  | 1674 | 3.87 |
| LOC_Os04g35560.2 | glutathione S-transferase, putative, expressed                            | Chr4  | 21662078 | 21664360 | - | 2  | 2239 | 3.87 |
| LOC_Os09g29520.1 | OsWAK81 - OsWAK receptor-like cytoplasmic kinase OsWAK-RLCK, expressed    | Chr9  | 17961169 | 17962785 | - | 1  | 1649 | 3.87 |
| LOC_Os12g12664.1 | expressed protein                                                         | Chr12 | 6976909  | 6982100  | - | 6  | 1989 | 3.87 |
| LOC_Os04g48070.2 | homeobox and START domains containing protein, putative, expressed        | Chr4  | 28600698 | 28607038 | - | 9  | 3377 | 3.87 |
| LOC_Os04g48070.1 | homeobox and START domains containing protein, putative, expressed        | Chr4  | 28600698 | 28607038 | - | 9  | 3398 | 3.87 |
| LOC_Os11g43860.2 | sodium/calcium exchanger protein, putative, expressed                     | Chr11 | 26488372 | 26492229 | - | 8  | 2382 | 3.87 |

|                  |                                                                            |       |          |            |    |      |      |
|------------------|----------------------------------------------------------------------------|-------|----------|------------|----|------|------|
| LOC_Os01g02940.1 | glycosyltransferase protein, putative, expressed                           | Chr1  | 1089743  | 1093528 -  | 7  | 2847 | 3.87 |
| LOC_Os01g02940.2 | glycosyltransferase protein, putative, expressed                           | Chr1  | 1089743  | 1093528 -  | 7  | 2874 | 3.87 |
| LOC_Os03g27930.1 | RNA cap guanine-N2 methyltransferase domain containing protein, expressed  | Chr3  | 16038993 | 16045538 + | 12 | 3060 | 3.88 |
| LOC_Os05g25040.1 | expressed protein                                                          | Chr5  | 14489386 | 14490822 - | 1  | 1469 | 3.88 |
| LOC_Os05g06050.1 | N-acetylglucosaminyltransferase, putative, expressed                       | Chr5  | 3030924  | 3033213 +  | 4  | 1349 | 3.88 |
| LOC_Os05g31020.1 | eukaryotic peptide chain release factor subunit 1-1, putative, expressed   | Chr5  | 18016617 | 18020387 + | 3  | 2228 | 3.88 |
| LOC_Os06g04080.1 | glycosyl hydrolases family 17, putative, expressed                         | Chr6  | 1691885  | 1694140 +  | 2  | 1780 | 3.88 |
| LOC_Os04g06340.1 | MEGL11 - Maternally expressed gene MEG family protein precursor, expressed | Chr4  | 3310335  | 3310831 -  | 2  | 331  | 3.88 |
| LOC_Os10g10290.1 | retrotransposon protein, putative, unclassified, expressed                 | Chr10 | 5654642  | 5656625 -  | 4  | 1637 | 3.88 |
| LOC_Os08g16210.1 | expressed protein                                                          | Chr8  | 9883373  | 9884799 +  | 5  | 919  | 3.88 |
| LOC_Os08g44470.1 | expressed protein                                                          | Chr8  | 27968335 | 27970713 - | 3  | 967  | 3.88 |
| LOC_Os11g40674.1 | expressed protein                                                          | Chr11 | 24273616 | 24274255 - | 1  | 672  | 3.88 |
| LOC_Os10g30300.2 | TRM112, putative, expressed                                                | Chr10 | 15737591 | 15740779 + | 4  | 784  | 3.88 |
| LOC_Os02g21490.1 | WD domain, G-beta repeat domain containing protein, expressed              | Chr2  | 12741603 | 12746536 - | 4  | 1754 | 3.88 |
| LOC_Os12g33194.1 | expressed protein                                                          | Chr12 | 20080388 | 20083537 - | 6  | 2049 | 3.88 |
| LOC_Os03g26200.1 | methyltransferase, putative, expressed                                     | Chr3  | 14992817 | 14997413 + | 7  | 2996 | 3.89 |
| LOC_Os03g18690.1 | 26S protease regulatory subunit 4, putative, expressed                     | Chr3  | 10462452 | 10466249 + | 6  | 1931 | 3.89 |
| LOC_Os03g15930.1 | OTU-like cysteine protease family protein, putative, expressed             | Chr3  | 8790747  | 8795463 +  | 8  | 1210 | 3.89 |
| LOC_Os01g18060.1 | sugar transporter superfamily, putative, expressed                         | Chr1  | 10113381 | 10119022 - | 3  | 3183 | 3.90 |
| LOC_Os06g23430.1 | signal recognition particle 19 kDa protein, putative, expressed            | Chr6  | 13677377 | 13681849 - | 3  | 1254 | 3.90 |
| LOC_Os03g55164.1 | WRKY4, expressed                                                           | Chr3  | 31391390 | 31399050 + | 12 | 3768 | 3.90 |
| LOC_Os08g35870.2 | OsFBL48 - F-box domain and LRR containing protein, expressed               | Chr8  | 22629626 | 22633862 - | 5  | 2048 | 3.90 |
| LOC_Os08g35870.1 | OsFBL48 - F-box domain and LRR containing protein, expressed               | Chr8  | 22629627 | 22633862 - | 4  | 2094 | 3.90 |
| LOC_Os03g03020.1 | L11 domain containing ribosomal protein, putative, expressed               | Chr3  | 1232214  | 1234476 -  | 4  | 1183 | 3.90 |
| LOC_Os01g14870.1 | zinc finger matrin-type protein 5, putative, expressed                     | Chr1  | 8334519  | 8338574 +  | 5  | 1883 | 3.90 |
| LOC_Os09g32150.1 | expressed protein                                                          | Chr9  | 19185853 | 19187966 - | 3  | 1059 | 3.90 |
| LOC_Os07g43460.1 | sphingolipid C4-hydroxylase SUR2, putative, expressed                      | Chr7  | 26014754 | 26017822 - | 2  | 1845 | 3.90 |
| LOC_Os09g01970.1 | expressed protein                                                          | Chr9  | 666201   | 668787 -   | 4  | 2190 | 3.90 |
| LOC_Os12g37530.3 | expressed protein                                                          | Chr12 | 23030950 | 23035532 - | 15 | 2682 | 3.90 |
| LOC_Os02g19650.1 | hydrolase, alpha/beta fold family domain containing protein, expressed     | Chr2  | 11484330 | 11488304 - | 10 | 2046 | 3.90 |
| LOC_Os12g03160.1 | transposon protein, putative, unclassified, expressed                      | Chr12 | 1203491  | 1206222 +  | 5  | 2221 | 3.90 |
| LOC_Os01g50616.2 | phosphatidylinositol transfer, putative, expressed                         | Chr1  | 29068131 | 29072196 - | 13 | 2547 | 3.90 |
| LOC_Os08g17000.1 | expressed protein                                                          | Chr8  | 10410093 | 10411904 + | 3  | 1049 | 3.91 |
| LOC_Os01g65310.1 | DUF803 domain containing, putative, expressed                              | Chr1  | 37887605 | 37890519 + | 9  | 2155 | 3.91 |
| LOC_Os11g02760.1 | histidine triad family protein, putative, expressed                        | Chr11 | 905662   | 907831 +   | 4  | 921  | 3.91 |
| LOC_Os03g57270.1 | ubiquitin carboxyl-terminal hydrolase, family 1, putative, expressed       | Chr3  | 32662255 | 32663811 - | 1  | 1589 | 3.91 |
| LOC_Os07g03025.1 | expressed protein                                                          | Chr7  | 1140062  | 1142002 -  | 2  | 1933 | 3.91 |
| LOC_Os03g03470.3 | expressed protein                                                          | Chr3  | 1499619  | 1504242 -  | 10 | 1995 | 3.91 |
| LOC_Os12g41780.2 | glycosyl transferase family 17 protein, putative, expressed                | Chr12 | 25882977 | 25885922 + | 2  | 2197 | 3.91 |
| LOC_Os12g41780.1 | glycosyl transferase family 17 protein, putative, expressed                | Chr12 | 25882977 | 25885922 + | 2  | 2202 | 3.91 |
| LOC_Os08g41840.1 | expressed protein                                                          | Chr8  | 26422216 | 26424002 - | 5  | 1110 | 3.91 |
| LOC_Os10g09684.1 | expressed protein                                                          | Chr10 | 5236268  | 5237084 +  | 1  | 849  | 3.91 |
| LOC_Os04g54110.1 | ARK3, putative, expressed                                                  | Chr4  | 32238374 | 32242528 + | 8  | 2320 | 3.91 |
| LOC_Os04g52520.1 | APO, putative, expressed                                                   | Chr4  | 31226065 | 31229583 + | 5  | 2613 | 3.91 |
| LOC_Os10g28570.4 | expressed protein                                                          | Chr10 | 14870774 | 14872480 - | 4  | 798  | 3.91 |

|                  |                                                                                                 |       |          |            |    |      |      |
|------------------|-------------------------------------------------------------------------------------------------|-------|----------|------------|----|------|------|
| LOC_Os02g34810.1 | OsAPx8 - Thylakoid-bound Ascorbate Peroxidase encoding gene 5,8, expressed                      | Chr2  | 20868260 | 20872079 - | 12 | 2209 | 3.91 |
| LOC_Os05g01630.2 | OsFBX156 - F-box domain containing protein, expressed                                           | Chr5  | 372754   | 375683 -   | 5  | 1250 | 3.91 |
| LOC_Os11g04900.1 | glycoprotein X precursor, putative, expressed                                                   | Chr11 | 2087797  | 2089433 -  | 1  | 1669 | 3.91 |
| LOC_Os05g32544.1 | glycosyltransferase, putative, expressed                                                        | Chr5  | 19021691 | 19030855 - | 5  | 2798 | 3.91 |
| LOC_Os04g09810.1 | riboflavin biosynthesis protein ribD, putative, expressed                                       | Chr4  | 5263669  | 5266752 -  | 3  | 2433 | 3.91 |
| LOC_Os09g28590.2 | AGAP010609-PA, putative, expressed                                                              | Chr9  | 17393602 | 17395622 + | 2  | 1169 | 3.91 |
| LOC_Os03g12100.1 | retrotransposon, putative, centromere-specific, expressed                                       | Chr3  | 6352368  | 6353019 +  | 2  | 451  | 3.91 |
| LOC_Os08g01030.1 | metal cation transporter, putative, expressed                                                   | Chr8  | 18912    | 24200 -    | 13 | 1801 | 3.91 |
| LOC_Os11g25530.1 | expressed protein                                                                               | Chr11 | 14551265 | 14552547 + | 2  | 805  | 3.91 |
| LOC_Os01g12830.1 | erythronate-4-phosphate dehydrogenase domain containing protein, expressed                      | Chr1  | 7100013  | 7103266 -  | 2  | 1518 | 3.91 |
| LOC_Os08g37370.2 | mitochondrial carrier protein, putative, expressed                                              | Chr8  | 23613091 | 23614707 - | 2  | 1554 | 3.91 |
| LOC_Os08g37370.1 | mitochondrial carrier protein, putative, expressed                                              | Chr8  | 23613091 | 23614707 - | 1  | 1649 | 3.91 |
| LOC_Os09g29830.3 | helix-loop-helix DNA-binding domain containing protein, expressed                               | Chr9  | 18141444 | 18144524 + | 7  | 2363 | 3.91 |
| LOC_Os09g29830.2 | helix-loop-helix DNA-binding domain containing protein, expressed                               | Chr9  | 18141444 | 18144524 + | 7  | 2366 | 3.91 |
| LOC_Os10g12140.1 | transposon protein, putative, unclassified, expressed                                           | Chr10 | 6749505  | 6754057 +  | 8  | 3226 | 3.91 |
| LOC_Os04g56770.1 | expressed protein                                                                               | Chr4  | 33856729 | 33859059 + | 6  | 813  | 3.92 |
| LOC_Os05g49670.1 | expressed protein                                                                               | Chr5  | 28487243 | 28488214 + | 1  | 1004 | 3.92 |
| LOC_Os05g33440.1 | mTERF domain containing protein, expressed                                                      | Chr5  | 19649708 | 19651104 - | 1  | 1429 | 3.92 |
| LOC_Os03g15940.1 | OsWLM2 - LIM domain protein, putative actin-binding protein and transcription factor, expressed | Chr3  | 8797848  | 8799836 +  | 5  | 1226 | 3.92 |
| LOC_Os01g72000.1 | armadillo repeat-containing protein, putative, expressed                                        | Chr1  | 41722424 | 41726252 - | 3  | 2878 | 3.92 |
| LOC_Os04g49430.1 | ZR1 protein, putative, expressed                                                                | Chr4  | 29493928 | 29498951 + | 8  | 3382 | 3.92 |
| LOC_Os11g31650.1 | expressed protein                                                                               | Chr11 | 18509086 | 18512627 + | 2  | 832  | 3.92 |
| LOC_Os03g02710.1 | hydroxymethylglutaryl-CoA synthase, putative, expressed                                         | Chr3  | 1015290  | 1020208 +  | 12 | 2286 | 3.92 |
| LOC_Os11g47570.1 | glycosyl hydrolase, putative, expressed                                                         | Chr11 | 28748076 | 28749262 + | 1  | 1219 | 3.92 |
| LOC_Os08g06280.3 | LSD1 zinc finger domain containing protein, expressed                                           | Chr8  | 3460710  | 3463827 -  | 5  | 1389 | 3.92 |
| LOC_Os08g06280.7 | LSD1 zinc finger domain containing protein, expressed                                           | Chr8  | 3460710  | 3463786 -  | 6  | 1214 | 3.92 |
| LOC_Os09g32190.1 | tRNA-splicing endonuclease positive effector-related, putative, expressed                       | Chr9  | 19209907 | 19212642 - | 4  | 851  | 3.92 |
| LOC_Os01g48190.2 | drought induced 19 protein, putative, expressed                                                 | Chr1  | 27601505 | 27604190 + | 4  | 1454 | 3.92 |
| LOC_Os07g23200.1 | F-actin-capping protein subunit alpha, putative, expressed                                      | Chr7  | 13074438 | 13078529 - | 10 | 1685 | 3.92 |
| LOC_Os11g06290.1 | expressed protein                                                                               | Chr11 | 3019550  | 3022478 +  | 2  | 2170 | 3.93 |
| LOC_Os09g25410.2 | expressed protein                                                                               | Chr9  | 15233373 | 15236004 + | 3  | 2477 | 3.93 |
| LOC_Os01g20880.1 | OsWAK3 - OsWAK receptor-like cytoplasmic kinase OsWAK-RLCK, expressed                           | Chr1  | 11655138 | 11659895 + | 5  | 3128 | 3.93 |
| LOC_Os05g40330.1 | auxin efflux carrier component, putative, expressed                                             | Chr5  | 23697738 | 23700670 - | 11 | 2096 | 3.93 |
| LOC_Os12g01430.1 | ribosomal protein L10, putative, expressed                                                      | Chr12 | 267657   | 270166 -   | 9  | 1455 | 3.93 |
| LOC_Os02g30630.2 | thiamine pyrophosphate enzyme, C-terminal TPP binding domain containing protein, expressed      | Chr2  | 18236025 | 18238371 + | 2  | 2326 | 3.93 |
| LOC_Os08g42030.1 | peroxidase precursor, putative, expressed                                                       | Chr8  | 26546747 | 26549806 - | 3  | 1681 | 3.93 |
| LOC_Os06g50890.1 | RNA recognition motif containing protein, expressed                                             | Chr6  | 30779924 | 30783639 + | 6  | 1140 | 3.93 |
| LOC_Os08g13480.1 | expressed protein                                                                               | Chr8  | 8023047  | 8023493 +  | 1  | 479  | 3.94 |
| LOC_Os05g03174.2 | glycosyltransferase family 43 protein, putative, expressed                                      | Chr5  | 1278891  | 1285604 +  | 4  | 2143 | 3.94 |
| LOC_Os04g41980.2 | ATOZ11, putative, expressed                                                                     | Chr4  | 24875259 | 24875977 + | 2  | 684  | 3.94 |
| LOC_Os04g41980.1 | ATOZ11, putative, expressed                                                                     | Chr4  | 24874021 | 24875977 + | 3  | 732  | 3.94 |
| LOC_Os03g02920.1 | peroxidase precursor, putative, expressed                                                       | Chr3  | 1172250  | 1176258 -  | 3  | 1680 | 3.94 |
| LOC_Os01g61330.1 | ankyrin homolog precursor, putative, expressed                                                  | Chr1  | 35480043 | 35482190 - | 2  | 1630 | 3.94 |
| LOC_Os01g25300.1 | expressed protein                                                                               | Chr1  | 14290373 | 14291666 + | 1  | 1326 | 3.94 |
| LOC_Os06g25294.1 | 60S ribosomal protein L18a-1, putative, expressed                                               | Chr6  | 14809929 | 14815856 - | 4  | 1024 | 3.94 |

|                  |                                                                |       |          |            |    |      |      |
|------------------|----------------------------------------------------------------|-------|----------|------------|----|------|------|
| LOC_Os08g06600.1 | nuf2 family protein, expressed                                 | Chr8  | 3722365  | 3726246 -  | 11 | 2102 | 3.94 |
| LOC_Os05g49990.2 | expressed protein                                              | Chr5  | 28667173 | 28668904 + | 1  | 1764 | 3.95 |
| LOC_Os01g65400.2 | DNA polymerase I, putative, expressed                          | Chr1  | 37957139 | 37959001 - | 5  | 1498 | 3.95 |
| LOC_Os03g03470.4 | expressed protein                                              | Chr3  | 1499619  | 1504242 -  | 9  | 2047 | 3.95 |
| LOC_Os03g03470.2 | expressed protein                                              | Chr3  | 1499619  | 1504242 -  | 9  | 2057 | 3.95 |
| LOC_Os07g29760.1 | cysteine proteinase A494 precursor, putative, expressed        | Chr7  | 17496502 | 17498225 + | 2  | 1702 | 3.95 |
| LOC_Os01g68970.2 | HYS1, putative, expressed                                      | Chr1  | 40070752 | 40073753 - | 2  | 2967 | 3.95 |
| LOC_Os06g08032.1 | flavonol synthase/flavanone 3-hydroxylase, putative, expressed | Chr6  | 3893672  | 3895400 +  | 4  | 1425 | 3.95 |
| LOC_Os06g07932.2 | flavonol synthase/flavanone 3-hydroxylase, putative, expressed | Chr6  | 3855441  | 3857393 +  | 4  | 1649 | 3.95 |
| LOC_Os06g41040.1 | pentatricopeptide, putative, expressed                         | Chr6  | 24510255 | 24512549 - | 2  | 1816 | 3.95 |
| LOC_Os04g58860.1 | harpin-induced protein 1 domain containing protein, expressed  | Chr4  | 35010940 | 35012452 - | 1  | 1545 | 3.95 |
| LOC_Os11g10040.2 | mTERF family protein, expressed                                | Chr11 | 5372635  | 5375523 +  | 2  | 1710 | 3.95 |
| LOC_Os05g17849.1 | expressed protein                                              | Chr5  | 10266450 | 10269371 - | 3  | 1661 | 3.95 |
| LOC_Os12g27335.1 | expressed protein                                              | Chr12 | 16061381 | 16061989 + | 1  | 641  | 3.95 |
| LOC_Os05g48280.1 | expressed protein                                              | Chr5  | 27673935 | 27682474 + | 8  | 2038 | 3.95 |
| LOC_Os02g47420.3 | ATROPGEF7/ROPGEF7, putative, expressed                         | Chr2  | 28953036 | 28958823 - | 8  | 2326 | 3.95 |
| LOC_Os02g03670.1 | expressed protein                                              | Chr2  | 1531654  | 1535776 -  | 9  | 2339 | 3.95 |
| LOC_Os02g03670.7 | expressed protein                                              | Chr2  | 1531654  | 1535776 -  | 8  | 2446 | 3.95 |
| LOC_Os02g03670.6 | expressed protein                                              | Chr2  | 1531654  | 1535776 -  | 8  | 2515 | 3.95 |
| LOC_Os02g03670.5 | expressed protein                                              | Chr2  | 1531654  | 1535776 -  | 7  | 2582 | 3.95 |
| LOC_Os02g03670.3 | expressed protein                                              | Chr2  | 1531654  | 1535776 -  | 6  | 3023 | 3.95 |
| LOC_Os07g07890.1 | expressed protein                                              | Chr7  | 3957194  | 3957853 +  | 1  | 692  | 3.95 |
| LOC_Os12g04660.1 | zinc finger, C3HC4 type domain containing protein, expressed   | Chr12 | 1973806  | 1974672 -  | 1  | 899  | 3.95 |
| LOC_Os05g13380.1 | retrotransposon protein, putative, unclassified, expressed     | Chr5  | 7424685  | 7429054 -  | 5  | 2026 | 3.95 |
| LOC_Os08g04120.1 | expressed protein                                              | Chr8  | 2000177  | 2005227 -  | 13 | 2210 | 3.95 |
| LOC_Os08g38010.2 | expressed protein                                              | Chr8  | 24079677 | 24082211 + | 5  | 933  | 3.95 |
| LOC_Os08g38010.1 | expressed protein                                              | Chr8  | 24079677 | 24082211 + | 5  | 939  | 3.95 |
| LOC_Os01g74000.1 | glycerol-3-phosphate dehydrogenase, putative, expressed        | Chr1  | 42860708 | 42866652 - | 12 | 2304 | 3.95 |
| LOC_Os05g44330.5 | DJ-1 family protein, putative, expressed                       | Chr5  | 25796297 | 25803236 + | 10 | 2640 | 3.95 |
| LOC_Os05g44330.1 | DJ-1 family protein, putative, expressed                       | Chr5  | 25796297 | 25803236 + | 10 | 2655 | 3.95 |
| LOC_Os05g44330.2 | DJ-1 family protein, putative, expressed                       | Chr5  | 25796297 | 25803236 + | 9  | 2703 | 3.95 |
| LOC_Os02g53780.1 | expressed protein                                              | Chr2  | 32945659 | 32951005 + | 14 | 2558 | 3.95 |
| LOC_Os04g38310.3 | expressed protein                                              | Chr4  | 22795145 | 22798775 - | 4  | 1453 | 3.95 |
| LOC_Os04g38310.1 | expressed protein                                              | Chr4  | 22795145 | 22798778 - | 5  | 1562 | 3.95 |
| LOC_Os04g38310.2 | expressed protein                                              | Chr4  | 22795145 | 22798775 - | 4  | 1664 | 3.95 |
| LOC_Os02g10860.1 | bZIP transcription factor domain containing protein, expressed | Chr2  | 5760034  | 5763645 -  | 6  | 1275 | 3.96 |
| LOC_Os12g37530.1 | expressed protein                                              | Chr12 | 23030948 | 23035532 - | 14 | 2747 | 3.96 |
| LOC_Os02g49950.1 | spotted leaf 11, putative, expressed                           | Chr2  | 30518022 | 30522430 + | 4  | 2520 | 3.96 |
| LOC_Os03g53250.1 | expressed protein                                              | Chr3  | 30548807 | 30553733 - | 8  | 3432 | 3.96 |
| LOC_Os09g21460.1 | expressed protein                                              | Chr9  | 12975276 | 12977293 - | 3  | 847  | 3.96 |
| LOC_Os06g39912.1 | expressed protein                                              | Chr6  | 23736833 | 23737879 + | 1  | 1079 | 3.96 |
| LOC_Os02g04250.1 | glycosyltransferase, putative, expressed                       | Chr2  | 1872601  | 1874915 +  | 3  | 2238 | 3.96 |
| LOC_Os02g04250.3 | glycosyltransferase, putative, expressed                       | Chr2  | 1872660  | 1874915 +  | 2  | 2221 | 3.96 |
| LOC_Os03g18370.1 | MRH1, putative, expressed                                      | Chr3  | 10292291 | 10295670 - | 7  | 2242 | 3.96 |
| LOC_Os09g28590.1 | AGAP010609-PA, putative, expressed                             | Chr9  | 17393569 | 17395622 + | 2  | 1376 | 3.96 |

|                  |                                                                                                  |       |          |            |    |      |      |
|------------------|--------------------------------------------------------------------------------------------------|-------|----------|------------|----|------|------|
| LOC_Os03g15930.2 | OTU-like cysteine protease family protein, putative, expressed                                   | Chr3  | 8790747  | 8795544 +  | 9  | 1234 | 3.96 |
| LOC_Os06g40240.1 | retrotransposon protein, putative, unclassified, expressed                                       | Chr6  | 23967708 | 23976387 + | 11 | 5930 | 3.97 |
| LOC_Os02g20380.2 | expressed protein                                                                                | Chr2  | 12008709 | 12015514 - | 8  | 1804 | 3.97 |
| LOC_Os03g59620.1 | phospholipase, patatin family, putative, expressed                                               | Chr3  | 33941624 | 33946147 - | 4  | 3708 | 3.97 |
| LOC_Os03g62160.2 | expressed protein                                                                                | Chr3  | 35208499 | 35211351 - | 8  | 1335 | 3.97 |
| LOC_Os03g62160.1 | expressed protein                                                                                | Chr3  | 35208499 | 35211351 - | 8  | 1332 | 3.97 |
| LOC_Os08g06610.1 | mps one binder kinase activator-like 1A, putative, expressed                                     | Chr8  | 3726902  | 3727461 +  | 3  | 387  | 3.97 |
| LOC_Os06g45650.1 | OsMADS30 - MADS-box family gene with MIKCC type-box, expressed                                   | Chr6  | 27637555 | 27641578 + | 8  | 1514 | 3.97 |
| LOC_Os04g44180.1 | expressed protein                                                                                | Chr4  | 26153617 | 26157120 + | 6  | 1077 | 3.98 |
| LOC_Os01g73150.1 | expressed protein                                                                                | Chr1  | 42421671 | 42424864 - | 5  | 2314 | 3.98 |
| LOC_Os08g06415.1 | expressed protein                                                                                | Chr8  | 3594201  | 3595314 -  | 1  | 1146 | 3.98 |
| LOC_Os07g12670.1 | expressed protein                                                                                | Chr7  | 7239161  | 7241105 -  | 4  | 1355 | 3.98 |
| LOC_Os03g21000.1 | thioredoxin, putative, expressed                                                                 | Chr3  | 11919251 | 11921367 - | 4  | 1431 | 3.98 |
| LOC_Os02g18090.1 | expressed protein                                                                                | Chr2  | 10509143 | 10512248 - | 2  | 1192 | 3.98 |
| LOC_Os07g22840.1 | anaphase-promoting complex subunit 11, putative, expressed                                       | Chr7  | 12881692 | 12883433 + | 2  | 412  | 3.98 |
| LOC_Os04g35070.1 | expressed protein                                                                                | Chr4  | 21319617 | 21320638 + | 1  | 1054 | 3.98 |
| LOC_Os11g47160.1 | receptor kinase 1, putative, expressed                                                           | Chr11 | 28371257 | 28373985 + | 2  | 2593 | 3.98 |
| LOC_Os03g02890.1 | expressed protein                                                                                | Chr3  | 1137129  | 1141062 +  | 5  | 2533 | 3.98 |
| LOC_Os03g56830.1 | ad-003, putative, expressed                                                                      | Chr3  | 32379925 | 32383820 - | 10 | 2447 | 3.98 |
| LOC_Os07g39630.1 | calcium-binding protein, putative, expressed                                                     | Chr7  | 23753108 | 23760707 + | 11 | 2901 | 3.98 |
| LOC_Os02g18390.1 | expressed protein                                                                                | Chr2  | 10704299 | 10705004 - | 1  | 738  | 3.98 |
| LOC_Os02g54140.1 | hsp20/alpha crystallin family protein, putative, expressed                                       | Chr2  | 33179486 | 33180458 + | 2  | 949  | 3.98 |
| LOC_Os03g27880.1 | tetratricopeptide-like helical, putative, expressed                                              | Chr3  | 16016493 | 16018739 - | 1  | 2279 | 3.98 |
| LOC_Os11g22150.3 | retrotransposon protein, putative, unclassified, expressed                                       | Chr11 | 12703893 | 12705636 - | 2  | 557  | 3.98 |
| LOC_Os11g22150.1 | retrotransposon protein, putative, unclassified, expressed                                       | Chr11 | 12703893 | 12706770 - | 4  | 779  | 3.98 |
| LOC_Os11g22150.2 | retrotransposon protein, putative, unclassified, expressed                                       | Chr11 | 12703893 | 12706775 - | 4  | 807  | 3.98 |
| LOC_Os04g14170.1 | retrotransposon protein, putative, unclassified, expressed                                       | Chr4  | 7934960  | 7935776 +  | 1  | 849  | 3.98 |
| LOC_Os09g04720.1 | SWIB/MDM2 domain containing protein, expressed                                                   | Chr9  | 2505261  | 2508294 -  | 2  | 1268 | 3.98 |
| LOC_Os09g37590.1 | OsFBDF47 - F-box and DUF domain containing protein, expressed                                    | Chr9  | 21666707 | 21673897 + | 13 | 3296 | 3.98 |
| LOC_Os01g17170.1 | magnesium-protoporphyrin IX monomethyl ester cyclase, chloroplast precursor, putative, expressed | Chr1  | 9874326  | 9876951 +  | 5  | 2171 | 3.99 |
| LOC_Os01g17170.2 | magnesium-protoporphyrin IX monomethyl ester cyclase, chloroplast precursor, putative, expressed | Chr1  | 9874326  | 9876951 +  | 3  | 2431 | 3.99 |
| LOC_Os04g31350.1 | expressed protein                                                                                | Chr4  | 18757684 | 18758848 - | 1  | 1197 | 3.99 |
| LOC_Os08g10340.1 | OsFBX278 - F-box domain containing protein, expressed                                            | Chr8  | 6055587  | 6059017 +  | 2  | 2074 | 3.99 |
| LOC_Os02g45420.1 | AP2 domain containing protein, expressed                                                         | Chr2  | 27621211 | 27622930 + | 1  | 1752 | 3.99 |
| LOC_Os12g01210.1 | HCF152, putative, expressed                                                                      | Chr12 | 125923   | 128386 +   | 1  | 2496 | 3.99 |
| LOC_Os01g02940.3 | glycosyltransferase protein, putative, expressed                                                 | Chr1  | 1089743  | 1093528 -  | 7  | 2887 | 3.99 |
| LOC_Os01g02940.6 | glycosyltransferase protein, putative, expressed                                                 | Chr1  | 1089743  | 1093528 -  | 6  | 2901 | 3.99 |
| LOC_Os01g02940.4 | glycosyltransferase protein, putative, expressed                                                 | Chr1  | 1089743  | 1093528 -  | 6  | 2907 | 3.99 |
| LOC_Os04g57880.1 | heat shock protein DnaJ, putative, expressed                                                     | Chr4  | 34489919 | 34492725 + | 4  | 2584 | 3.99 |
| LOC_Os04g54620.1 | expressed protein                                                                                | Chr4  | 32478832 | 32479294 + | 2  | 313  | 3.99 |
| LOC_Os01g67835.1 | ompA/MotB, putative, expressed                                                                   | Chr1  | 39421336 | 39422280 + | 1  | 977  | 3.99 |
| LOC_Os08g32910.1 | expressed protein                                                                                | Chr8  | 20402026 | 20405988 + | 7  | 2257 | 3.99 |
| LOC_Os02g47420.1 | ATROPGEF7/ROPGEF7, putative, expressed                                                           | Chr2  | 28952897 | 28959125 - | 9  | 2678 | 3.99 |
| LOC_Os02g47420.2 | ATROPGEF7/ROPGEF7, putative, expressed                                                           | Chr2  | 28952897 | 28957981 - | 7  | 2709 | 3.99 |
| LOC_Os02g47420.4 | ATROPGEF7/ROPGEF7, putative, expressed                                                           | Chr2  | 28952897 | 28957973 - | 7  | 2744 | 3.99 |

|                  |                                                                                         |       |          |            |    |      |      |
|------------------|-----------------------------------------------------------------------------------------|-------|----------|------------|----|------|------|
| LOC_Os04g28260.1 | Kinesin motor domain domain containing protein, expressed                               | Chr4  | 16698985 | 16707481 + | 15 | 4120 | 3.99 |
| LOC_Os07g19274.1 | retrotransposon protein, putative, Ty3-gypsy subclass                                   | Chr7  | 11405205 | 11409903 + | 3  | 1797 | 3.99 |
| LOC_Os01g56540.1 | histone-lysine N-methyltransferase SUVR3, putative, expressed                           | Chr1  | 32594360 | 32597265 - | 4  | 1160 | 3.99 |
| LOC_Os09g29830.1 | helix-loop-helix DNA-binding domain containing protein, expressed                       | Chr9  | 18141109 | 18144524 + | 8  | 2164 | 3.99 |
| LOC_Os08g24390.1 | expressed protein                                                                       | Chr8  | 14724917 | 14732048 - | 13 | 2613 | 3.99 |
| LOC_Os08g24390.2 | expressed protein                                                                       | Chr8  | 14724917 | 14732033 - | 12 | 2649 | 3.99 |
| LOC_Os02g10430.1 | 1-5-phosphoribosyl-5-5-phosphoribosylaminomethylideneaminoimidazole-4-carboxamide isome | Chr2  | 5478698  | 5480881 -  | 4  | 1269 | 3.99 |
| LOC_Os02g47980.1 | DUF617 domain containing protein, expressed                                             | Chr2  | 29364087 | 29365510 + | 2  | 1364 | 3.99 |
| LOC_Os10g21298.1 | cytochrome b559 subunit alpha, putative                                                 | Chr10 | 10869191 | 10869442 - | 1  | 284  | 3.99 |
| LOC_Os03g06340.2 | XS domain containing protein, expressed                                                 | Chr3  | 3170103  | 3176422 +  | 3  | 1403 | 3.99 |
| LOC_Os12g38540.1 | expressed protein                                                                       | Chr12 | 23664188 | 23666614 + | 4  | 1258 | 3.99 |
| LOC_Os02g39340.2 | glycine-rich protein, putative, expressed                                               | Chr2  | 23745236 | 23747925 + | 3  | 851  | 4.00 |
| LOC_Os01g13300.1 | B3 DNA binding domain containing protein, expressed                                     | Chr1  | 7417303  | 7422624 +  | 9  | 2510 | 4.00 |
| LOC_Os08g42020.2 | zinc ion binding protein, putative, expressed                                           | Chr8  | 26543220 | 26545786 + | 2  | 2270 | 4.00 |
| LOC_Os01g08190.1 | transcriptional corepressor LEUNIG, putative, expressed                                 | Chr1  | 3976431  | 3984922 +  | 18 | 3723 | 4.00 |
| LOC_Os01g08190.3 | transcriptional corepressor LEUNIG, putative, expressed                                 | Chr1  | 3976431  | 3984922 +  | 17 | 4047 | 4.00 |
| LOC_Os01g08190.2 | transcriptional corepressor LEUNIG, putative, expressed                                 | Chr1  | 3975902  | 3984922 +  | 18 | 4246 | 4.00 |
| LOC_Os03g50480.2 | phosphoglucomutase, putative, expressed                                                 | Chr3  | 28814082 | 28820161 + | 18 | 2642 | 4.00 |
| LOC_Os03g50480.1 | phosphoglucomutase, putative, expressed                                                 | Chr3  | 28813570 | 28820161 + | 18 | 2798 | 4.00 |
| LOC_Os03g56590.1 | expressed protein                                                                       | Chr3  | 32237954 | 32240951 - | 7  | 2077 | 4.00 |
| LOC_Os08g44480.1 | 40S ribosomal protein S25, putative, expressed                                          | Chr8  | 27973018 | 27974740 + | 4  | 846  | 4.00 |
| LOC_Os06g41384.1 | zinc finger C-x8-C-x5-C-x3-H type family protein, expressed                             | Chr6  | 24808757 | 24811960 - | 3  | 1494 | 4.00 |
| LOC_Os06g41384.2 | zinc finger C-x8-C-x5-C-x3-H type family protein, expressed                             | Chr6  | 24808757 | 24811960 - | 3  | 1494 | 4.00 |
| LOC_Os08g01350.2 | transmembrane protein 18, putative, expressed                                           | Chr8  | 222483   | 225362 -   | 3  | 1287 | 4.00 |
| LOC_Os04g46079.1 | ELMO/CED-12 family protein, putative, expressed                                         | Chr4  | 27300831 | 27317008 - | 9  | 1600 | 4.01 |
| LOC_Os10g41190.1 | transporter family protein, putative, expressed                                         | Chr10 | 22124277 | 22127825 + | 3  | 2088 | 4.01 |
| LOC_Os05g43650.1 | expressed protein                                                                       | Chr5  | 25382322 | 25385633 + | 6  | 2008 | 4.01 |
| LOC_Os03g07920.1 | expressed protein                                                                       | Chr3  | 4037983  | 4039509 -  | 1  | 1559 | 4.01 |
| LOC_Os02g20380.1 | expressed protein                                                                       | Chr2  | 12008709 | 12015514 - | 7  | 1852 | 4.01 |
| LOC_Os02g20380.3 | expressed protein                                                                       | Chr2  | 12008709 | 12015514 - | 7  | 1840 | 4.01 |
| LOC_Os04g22950.1 | expressed protein                                                                       | Chr4  | 13027300 | 13028385 - | 4  | 593  | 4.01 |
| LOC_Os01g40710.1 | high light inducible protein, putative, expressed                                       | Chr1  | 23003671 | 23005010 + | 2  | 903  | 4.01 |
| LOC_Os04g37770.1 | transposon protein, putative, CACTA, En/Spm sub-class, expressed                        | Chr4  | 22452022 | 22452695 - | 1  | 706  | 4.01 |
| LOC_Os08g01350.1 | transmembrane protein 18, putative, expressed                                           | Chr8  | 222452   | 225362 -   | 4  | 1266 | 4.01 |
| LOC_Os06g23040.1 | expressed protein                                                                       | Chr6  | 13440852 | 13442506 + | 4  | 794  | 4.01 |
| LOC_Os11g08314.1 | methyltransferase, putative, expressed                                                  | Chr11 | 4380785  | 4387947 +  | 6  | 3769 | 4.01 |
| LOC_Os01g11570.1 | GDSL-like lipase/acylhydrolase, putative, expressed                                     | Chr1  | 6242495  | 6244969 -  | 5  | 1287 | 4.01 |
| LOC_Os03g55220.2 | bHelix-loop-helix transcription factor, putative, expressed                             | Chr3  | 31422049 | 31426612 + | 7  | 1703 | 4.01 |
| LOC_Os10g02814.1 | G-protein alpha subunit, putative, expressed                                            | Chr10 | 1126728  | 1130428 +  | 5  | 1836 | 4.01 |
| LOC_Os03g24830.1 | uncharacterized protein HI0077, putative, expressed                                     | Chr3  | 14147678 | 14150344 + | 2  | 1564 | 4.02 |
| LOC_Os05g33690.3 | receptor-like protein kinase precursor, putative, expressed                             | Chr5  | 19828422 | 19830859 + | 2  | 2281 | 4.02 |
| LOC_Os05g33690.1 | receptor-like protein kinase precursor, putative, expressed                             | Chr5  | 19828422 | 19830859 + | 1  | 2470 | 4.02 |
| LOC_Os07g19470.1 | uncharacterized ACR, YggU family COG1872 containing protein, expressed                  | Chr7  | 11513903 | 11518207 - | 7  | 1524 | 4.02 |
| LOC_Os07g19470.2 | uncharacterized ACR, YggU family COG1872 containing protein, expressed                  | Chr7  | 11513903 | 11518207 - | 7  | 1510 | 4.02 |
| LOC_Os06g08884.2 | expressed protein                                                                       | Chr6  | 4468201  | 4469580 -  | 2  | 1043 | 4.02 |

|                  |                                                                                            |       |          |          |   |    |      |      |
|------------------|--------------------------------------------------------------------------------------------|-------|----------|----------|---|----|------|------|
| LOC_Os10g08030.1 | retrotransposon protein, putative, Ty3-gypsy subclass                                      | Chr10 | 4351889  | 4355589  | - | 5  | 2335 | 4.02 |
| LOC_Os01g12730.1 | ras-related protein, putative, expressed                                                   | Chr1  | 7043932  | 7047559  | + | 7  | 1506 | 4.02 |
| LOC_Os08g35910.1 | expressed protein                                                                          | Chr8  | 22647366 | 22652881 | - | 8  | 2570 | 4.02 |
| LOC_Os05g40600.1 | transposon protein, putative, unclassified, expressed                                      | Chr5  | 23813758 | 23816043 | + | 3  | 1920 | 4.02 |
| LOC_Os06g10340.1 | autophagy-related protein 12, putative, expressed                                          | Chr6  | 5308992  | 5310602  | + | 5  | 442  | 4.02 |
| LOC_Os12g07050.2 | RNA polymerase II subunit A C-terminal domain phosphatase ssu72, putative, expressed       | Chr12 | 3452829  | 3454059  | - | 3  | 834  | 4.02 |
| LOC_Os01g24020.1 | expressed protein                                                                          | Chr1  | 13523472 | 13531777 | - | 3  | 765  | 4.02 |
| LOC_Os11g40760.1 | expressed protein                                                                          | Chr11 | 24382955 | 24384066 | + | 1  | 1144 | 4.02 |
| LOC_Os12g41680.1 | No apical meristem protein, putative, expressed                                            | Chr12 | 25800944 | 25806553 | + | 3  | 1628 | 4.02 |
| LOC_Os11g25240.1 | retrotransposon protein, putative, unclassified, expressed                                 | Chr11 | 14382008 | 14383757 | - | 4  | 645  | 4.02 |
| LOC_Os05g01630.3 | OsFBX156 - F-box domain containing protein, expressed                                      | Chr5  | 372760   | 375683   | - | 4  | 1384 | 4.02 |
| LOC_Os02g46660.1 | SNARE associated Golgi protein, putative, expressed                                        | Chr2  | 28478607 | 28481356 | - | 4  | 1434 | 4.02 |
| LOC_Os02g34120.1 | expressed protein                                                                          | Chr2  | 20408380 | 20411779 | - | 9  | 1608 | 4.02 |
| LOC_Os07g15500.1 | expressed protein                                                                          | Chr7  | 8994041  | 8997214  | - | 8  | 1611 | 4.02 |
| LOC_Os01g53180.1 | retrotransposon protein, putative, Ty1-copia subclass, expressed                           | Chr1  | 30554345 | 30554710 | + | 2  | 343  | 4.02 |
| LOC_Os05g49410.1 | expressed protein                                                                          | Chr5  | 28329422 | 28330698 | + | 2  | 875  | 4.02 |
| LOC_Os01g06150.1 | expressed protein                                                                          | Chr1  | 2930802  | 2932892  | + | 3  | 1137 | 4.02 |
| LOC_Os08g31000.1 | expressed protein                                                                          | Chr8  | 19139609 | 19142693 | + | 3  | 2481 | 4.02 |
| LOC_Os02g04860.1 | expressed protein                                                                          | Chr2  | 2242926  | 2246169  | - | 3  | 1333 | 4.03 |
| LOC_Os06g23684.2 | tyrosine aminotransferase, putative, expressed                                             | Chr6  | 13835593 | 13839057 | + | 4  | 1603 | 4.03 |
| LOC_Os01g08520.1 | DUF581 domain containing protein, expressed                                                | Chr1  | 4215032  | 4217547  | - | 3  | 1744 | 4.03 |
| LOC_Os04g51290.1 | expressed protein                                                                          | Chr4  | 30380539 | 30384728 | + | 8  | 2806 | 4.03 |
| LOC_Os01g55974.1 | deoxycytidylate deaminase, putative, expressed                                             | Chr1  | 32233137 | 32238980 | - | 9  | 1340 | 4.03 |
| LOC_Os01g19160.1 | protein kinase domain containing protein, expressed                                        | Chr1  | 10819351 | 10822413 | - | 3  | 1571 | 4.03 |
| LOC_Os01g19160.2 | protein kinase domain containing protein, expressed                                        | Chr1  | 10819351 | 10822413 | - | 4  | 1730 | 4.03 |
| LOC_Os08g34760.1 | expressed protein                                                                          | Chr8  | 21848889 | 21856111 | - | 7  | 3137 | 4.03 |
| LOC_Os05g23393.1 | expressed protein                                                                          | Chr5  | 13366937 | 13367660 | + | 1  | 756  | 4.03 |
| LOC_Os07g35130.1 | OsFBX240 - F-box domain containing protein, expressed                                      | Chr7  | 21041406 | 21043393 | + | 2  | 1876 | 4.03 |
| LOC_Os12g01160.1 | dehydrogenase, putative, expressed                                                         | Chr12 | 93091    | 95423    | + | 7  | 1328 | 4.03 |
| LOC_Os09g07280.1 | expressed protein                                                                          | Chr9  | 3577888  | 3580495  | + | 4  | 635  | 4.03 |
| LOC_Os11g06180.1 | nodulation-signaling pathway 2 protein, putative, expressed                                | Chr11 | 2950162  | 2952223  | + | 3  | 1515 | 4.03 |
| LOC_Os05g31744.1 | expressed protein                                                                          | Chr5  | 18489775 | 18490672 | - | 1  | 930  | 4.03 |
| LOC_Os09g10770.1 | OsTOP6B - Topoisomerase 6 subunit B, expressed                                             | Chr9  | 5874972  | 5883020  | + | 19 | 3122 | 4.03 |
| LOC_Os08g37260.1 | expressed protein                                                                          | Chr8  | 23551865 | 23556346 | - | 3  | 2088 | 4.03 |
| LOC_Os08g31120.1 | expressed protein                                                                          | Chr8  | 19220469 | 19224534 | + | 4  | 989  | 4.03 |
| LOC_Os12g34052.1 | expressed protein                                                                          | Chr12 | 20575896 | 20576480 | - | 1  | 617  | 4.03 |
| LOC_Os07g43060.1 | transcription elongation factor SPT4 homolog 1, putative, expressed                        | Chr7  | 25797879 | 25800778 | - | 5  | 942  | 4.03 |
| LOC_Os07g43060.2 | transcription elongation factor SPT4 homolog 1, putative, expressed                        | Chr7  | 25797879 | 25800778 | - | 5  | 938  | 4.03 |
| LOC_Os06g07474.2 | tetratricopeptide repeat domain containing protein, expressed                              | Chr6  | 3588217  | 3595865  | - | 15 | 2415 | 4.03 |
| LOC_Os06g07474.1 | tetratricopeptide repeat domain containing protein, expressed                              | Chr6  | 3588217  | 3595865  | - | 15 | 2404 | 4.03 |
| LOC_Os02g30630.1 | thiamine pyrophosphate enzyme, C-terminal TPP binding domain containing protein, expressed | Chr2  | 18236025 | 18238376 | + | 1  | 2384 | 4.04 |
| LOC_Os01g12730.2 | ras-related protein, putative, expressed                                                   | Chr1  | 7043936  | 7047559  | + | 6  | 1595 | 4.04 |
| LOC_Os07g49260.1 | importin subunit beta, putative, expressed                                                 | Chr7  | 29495914 | 29504033 | + | 23 | 3969 | 4.04 |
| LOC_Os04g33510.2 | expressed protein                                                                          | Chr4  | 20276155 | 20279496 | + | 7  | 1386 | 4.04 |
| LOC_Os04g33510.1 | expressed protein                                                                          | Chr4  | 20276163 | 20279496 | + | 7  | 1381 | 4.04 |

|                  |                                                                                                 |       |          |            |    |      |      |
|------------------|-------------------------------------------------------------------------------------------------|-------|----------|------------|----|------|------|
| LOC_Os05g03174.1 | glycosyltransferase family 43 protein, putative, expressed                                      | Chr5  | 1278891  | 1285604 +  | 3  | 2382 | 4.04 |
| LOC_Os07g27810.1 | fiber protein Fb34, putative, expressed                                                         | Chr7  | 16226488 | 16230771 - | 3  | 1317 | 4.04 |
| LOC_Os01g44170.1 | expressed protein                                                                               | Chr1  | 25317115 | 25323500 + | 7  | 1652 | 4.04 |
| LOC_Os06g07923.2 | expressed protein                                                                               | Chr6  | 3852139  | 3854472 +  | 2  | 584  | 4.05 |
| LOC_Os12g04750.1 | OsDegp14 - Putative Deg protease homologue, expressed                                           | Chr12 | 2017474  | 2022888 -  | 14 | 2875 | 4.05 |
| LOC_Os12g01430.2 | ribosomal protein L10, putative, expressed                                                      | Chr12 | 267657   | 270166 -   | 7  | 1712 | 4.05 |
| LOC_Os03g63010.2 | plastid terminal oxidase, putative, expressed                                                   | Chr3  | 35625601 | 35629619 + | 6  | 1710 | 4.05 |
| LOC_Os04g33885.1 | expressed protein                                                                               | Chr4  | 20528785 | 20530320 - | 1  | 1568 | 4.05 |
| LOC_Os02g48780.1 | IQ calmodulin-binding and BAG domain containing protein, putative, expressed                    | Chr2  | 29853571 | 29854458 + | 1  | 920  | 4.05 |
| LOC_Os10g28230.1 | Core histone H2A/H2B/H3/H4 domain containing protein, putative, expressed                       | Chr10 | 14678069 | 14679443 + | 2  | 1069 | 4.05 |
| LOC_Os01g39010.1 | 50S ribosomal protein, putative, expressed                                                      | Chr1  | 21933264 | 21936072 + | 3  | 964  | 4.05 |
| LOC_Os05g28470.1 | expressed protein                                                                               | Chr5  | 16665100 | 16671351 + | 6  | 2148 | 4.05 |
| LOC_Os02g37309.1 | expressed protein                                                                               | Chr2  | 22556912 | 22558163 - | 1  | 1284 | 4.05 |
| LOC_Os08g28560.1 | expressed protein                                                                               | Chr8  | 17439555 | 17443728 - | 3  | 1523 | 4.05 |
| LOC_Os09g31050.1 | cytosolic phospholipase A2 beta, putative, expressed                                            | Chr9  | 18673330 | 18674857 - | 1  | 1560 | 4.05 |
| LOC_Os09g15980.1 | expressed protein                                                                               | Chr9  | 9768935  | 9773089 +  | 4  | 1610 | 4.05 |
| LOC_Os12g10200.1 | SAM-dependent methyltransferase, putative, expressed                                            | Chr12 | 5391917  | 5394919 -  | 7  | 2246 | 4.05 |
| LOC_Os04g36730.1 | PHD finger protein, putative, expressed                                                         | Chr4  | 22189014 | 22191831 + | 5  | 1449 | 4.06 |
| LOC_Os01g55570.2 | expressed protein                                                                               | Chr1  | 32014398 | 32016274 + | 4  | 1503 | 4.06 |
| LOC_Os08g24930.1 | expressed protein                                                                               | Chr8  | 15105055 | 15109398 + | 3  | 2260 | 4.06 |
| LOC_Os01g71270.1 | eukaryotic peptide chain release factor subunit 1-1, putative, expressed                        | Chr1  | 41242467 | 41243837 + | 1  | 1403 | 4.06 |
| LOC_Os11g03680.1 | OsFBX395 - F-box domain containing protein, expressed                                           | Chr11 | 1433750  | 1435203 +  | 1  | 1486 | 4.06 |
| LOC_Os03g02570.1 | dihydrodipicolinate reductase, putative, expressed                                              | Chr3  | 950273   | 952602 -   | 9  | 1185 | 4.06 |
| LOC_Os03g29630.1 | ulp1 protease family protein, putative, expressed                                               | Chr3  | 16888876 | 16892201 + | 9  | 1482 | 4.06 |
| LOC_Os05g45820.1 | heavy metal-associated domain containing protein, expressed                                     | Chr5  | 26538000 | 26541970 - | 3  | 1593 | 4.06 |
| LOC_Os11g32390.1 | expressed protein                                                                               | Chr11 | 19128672 | 19130334 - | 4  | 473  | 4.06 |
| LOC_Os02g15750.1 | expressed protein                                                                               | Chr2  | 8873032  | 8876441 +  | 9  | 2239 | 4.06 |
| LOC_Os03g06160.1 | BTBP1 - Bric-a-Brac, Tramtrack, Broad Complex BTB domain with pentapeptide repeats, expressed   | Chr3  | 3091857  | 3095663 +  | 11 | 1887 | 4.06 |
| LOC_Os02g10430.2 | 1-5-phosphoribosyl-5-5-phosphoribosylaminomethylideneaminoimidazole-4-carboxamide isomer        | Chr2  | 5478698  | 5480881 -  | 4  | 1355 | 4.06 |
| LOC_Os07g36930.1 | expressed protein                                                                               | Chr7  | 22110787 | 22113703 + | 2  | 1670 | 4.06 |
| LOC_Os07g36230.3 | BTBN15 - Bric-a-Brac, Tramtrack, Broad Complex BTB domain with non-phototropic hypocotyl 3-like | Chr7  | 21653722 | 21657359 + | 3  | 2325 | 4.06 |
| LOC_Os02g44770.1 | uncharacterized mscS family protein, putative, expressed                                        | Chr2  | 27117991 | 27122440 + | 5  | 3535 | 4.06 |
| LOC_Os12g03270.1 | ELMO/CED-12 family protein, putative, expressed                                                 | Chr12 | 1265812  | 1269154 +  | 10 | 1641 | 4.06 |
| LOC_Os01g59950.1 | pentatricopeptide repeat-containing protein, putative, expressed                                | Chr1  | 34663998 | 34664902 - | 1  | 937  | 4.06 |
| LOC_Os06g42030.1 | potassium transporter, putative, expressed                                                      | Chr6  | 25235281 | 25242965 - | 9  | 6152 | 4.07 |
| LOC_Os11g12270.2 | expressed protein                                                                               | Chr11 | 6851207  | 6853897 +  | 5  | 1281 | 4.07 |
| LOC_Os06g21340.3 | rho GDP-dissociation inhibitor 1, putative, expressed                                           | Chr6  | 12322863 | 12325489 - | 4  | 998  | 4.07 |
| LOC_Os09g28760.1 | CXE carboxylesterase, putative, expressed                                                       | Chr9  | 17473042 | 17473491 + | 1  | 482  | 4.07 |
| LOC_Os03g31180.3 | diacylglycerol kinase 1, putative, expressed                                                    | Chr3  | 17757829 | 17761133 + | 7  | 1812 | 4.07 |
| LOC_Os08g06280.4 | LSD1 zinc finger domain containing protein, expressed                                           | Chr8  | 3460710  | 3463786 -  | 7  | 1334 | 4.07 |
| LOC_Os01g16530.1 | OsClp1 - Putative Clp protease homologue, expressed                                             | Chr1  | 9378864  | 9383183 -  | 7  | 1511 | 4.07 |
| LOC_Os03g36730.1 | OST3/OST6 family protein, putative, expressed                                                   | Chr3  | 20363507 | 20370047 - | 2  | 1545 | 4.08 |
| LOC_Os04g08034.5 | ZOS4-02 - C2H2 zinc finger protein, expressed                                                   | Chr4  | 4274958  | 4290615 +  | 19 | 2698 | 4.08 |
| LOC_Os02g51280.1 | TCP-domain protein, putative, expressed                                                         | Chr2  | 31396707 | 31399105 + | 1  | 2431 | 4.08 |
| LOC_Os01g10340.1 | expressed protein                                                                               | Chr1  | 5435443  | 5442651 -  | 11 | 1523 | 4.08 |



|                       |                                                                              |       |          |            |    |      |      |
|-----------------------|------------------------------------------------------------------------------|-------|----------|------------|----|------|------|
| LOC_Os01g58754.1      | expressed protein                                                            | Chr1  | 33960314 | 33961061 + | 1  | 780  | 4.08 |
| LOC_Os08g06280.1      | LSD1 zinc finger domain containing protein, expressed                        | Chr8  | 3460710  | 3463827 -  | 8  | 1533 | 4.08 |
| LOC_Os08g06280.2      | LSD1 zinc finger domain containing protein, expressed                        | Chr8  | 3460710  | 3463758 -  | 7  | 1530 | 4.08 |
| LOC_Os09g04240.1      | retrotransposon protein, putative, unclassified, expressed                   | Chr9  | 2237300  | 2245121 +  | 6  | 6903 | 4.08 |
| LOC_Os01g62660.1      | MYB family transcription factor, putative, expressed                         | Chr1  | 36286928 | 36289643 + | 1  | 2748 | 4.08 |
| LOC_Os08g04830.1      | expressed protein                                                            | Chr8  | 2427513  | 2431161 -  | 2  | 1911 | 4.09 |
| LOC_Os02g09670.1      | MYB protein, putative, expressed                                             | Chr2  | 4966920  | 4973686 +  | 5  | 1221 | 4.09 |
| LOC_Os06g12790.1      | ras-related protein, putative, expressed                                     | Chr6  | 6990939  | 6994556 +  | 8  | 1454 | 4.09 |
| LOC_Os03g46390.1      | ras-related protein, putative, expressed                                     | Chr3  | 26234213 | 26240763 + | 7  | 1438 | 4.09 |
| LOC_Os12g34460.2      | auxin-binding protein 4 precursor, putative, expressed                       | Chr12 | 20869417 | 20871021 + | 3  | 1211 | 4.09 |
| LOC_Os06g42020.1      | CSLA9 - cellulose synthase-like family A, expressed                          | Chr6  | 25231214 | 25235898 + | 9  | 2435 | 4.09 |
| LOC_Os04g57930.1      | thioredoxin, putative, expressed                                             | Chr4  | 34513582 | 34515350 + | 2  | 964  | 4.09 |
| LOC_Os01g50616.1      | phosphatidylinositol transfer, putative, expressed                           | Chr1  | 29066657 | 29072196 - | 15 | 3297 | 4.09 |
| LOC_Os08g33340.2      | RAD23 DNA repair protein, putative, expressed                                | Chr8  | 20796966 | 20801724 + | 11 | 1999 | 4.09 |
| LOC_Os08g33340.1      | RAD23 DNA repair protein, putative, expressed                                | Chr8  | 20796966 | 20801724 + | 11 | 2002 | 4.09 |
| ChrUn.fgenesh.mRNA.69 | expressed protein                                                            | ChrUn | 451392   | 455909 -   | 9  | 1185 | 4.09 |
| ChrUn.fgenesh.mRNA.74 | expressed protein                                                            | ChrUn | 472469   | 476986 -   | 9  | 1185 | 4.09 |
| LOC_Os06g01850.1      | ferredoxin--NADP reductase, chloroplast precursor, putative, expressed       | Chr6  | 479178   | 481669 -   | 8  | 1737 | 4.09 |
| LOC_Os01g55750.1      | TCP family transcription factor, putative, expressed                         | Chr1  | 32106832 | 32108671 - | 1  | 1872 | 4.09 |
| LOC_Os10g38020.1      | expressed protein                                                            | Chr10 | 20360947 | 20365155 + | 3  | 1969 | 4.09 |
| LOC_Os10g03540.1      | ribosomal protein L7Ae, putative, expressed                                  | Chr10 | 1530559  | 1532298 +  | 4  | 928  | 4.09 |
| LOC_Os05g19954.3      | tRNA pseudouridine synthase family protein, putative, expressed              | Chr5  | 11647790 | 11656591 - | 5  | 1074 | 4.09 |
| LOC_Os06g42540.1      | expressed protein                                                            | Chr6  | 25582962 | 25585092 + | 3  | 1093 | 4.09 |
| LOC_Os01g16060.1      | expressed protein                                                            | Chr1  | 9041580  | 9046087 -  | 3  | 3201 | 4.09 |
| LOC_Os02g07220.1      | peptidyl-prolyl cis-trans isomerase, FKBP-type, putative, expressed          | Chr2  | 3711144  | 3713440 -  | 4  | 1141 | 4.09 |
| LOC_Os01g55750.2      | TCP family transcription factor, putative, expressed                         | Chr1  | 32106832 | 32109743 - | 2  | 1711 | 4.09 |
| LOC_Os01g55750.3      | TCP family transcription factor, putative, expressed                         | Chr1  | 32106832 | 32109745 - | 2  | 1717 | 4.09 |
| LOC_Os01g52280.1      | NB-ARC domain containing protein, expressed                                  | Chr1  | 30055567 | 30057039 + | 1  | 1505 | 4.09 |
| LOC_Os11g12340.1      | disease resistance protein RPM1, putative, expressed                         | Chr11 | 6888057  | 6896357 +  | 2  | 3490 | 4.09 |
| LOC_Os05g11090.1      | thioredoxin, putative, expressed                                             | Chr5  | 6233819  | 6237913 -  | 4  | 1255 | 4.09 |
| LOC_Os03g10350.2      | NPGR1, putative, expressed                                                   | Chr3  | 5276817  | 5281556 -  | 6  | 3442 | 4.10 |
| LOC_Os04g41810.1      | expressed protein                                                            | Chr4  | 24766247 | 24769318 + | 4  | 2004 | 4.10 |
| LOC_Os07g48360.1      | helicase conserved C-terminal domain containing protein, expressed           | Chr7  | 28901448 | 28908698 + | 20 | 3833 | 4.10 |
| LOC_Os05g49220.1      | GTP-binding protein, putative, expressed                                     | Chr5  | 28243253 | 28244772 - | 5  | 1256 | 4.10 |
| LOC_Os04g52520.3      | APO, putative, expressed                                                     | Chr4  | 31226016 | 31230567 + | 8  | 2002 | 4.10 |
| LOC_Os04g52520.4      | APO, putative, expressed                                                     | Chr4  | 31226016 | 31230567 + | 8  | 2006 | 4.10 |
| LOC_Os01g72930.1      | pentatricopeptide, putative, expressed                                       | Chr1  | 42297255 | 42300253 + | 2  | 2881 | 4.10 |
| LOC_Os12g31050.1      | transposon protein, putative, CACTA, En/Spm sub-class, expressed             | Chr12 | 18660378 | 18664109 + | 8  | 2758 | 4.10 |
| LOC_Os12g31410.1      | expressed protein                                                            | Chr12 | 18893310 | 18895347 - | 2  | 760  | 4.10 |
| LOC_Os08g42210.1      | expressed protein                                                            | Chr8  | 26658479 | 26661534 + | 8  | 1363 | 4.10 |
| LOC_Os01g68010.3      | TBC domain containing protein, expressed                                     | Chr1  | 39538148 | 39541096 - | 9  | 1605 | 4.10 |
| LOC_Os09g12050.1      | retrotransposon protein, putative, unclassified, expressed                   | Chr9  | 6803261  | 6806757 +  | 6  | 1398 | 4.10 |
| LOC_Os05g31780.1      | adaptor complexes medium subunit family domain containing protein, expressed | Chr5  | 18508427 | 18512695 - | 8  | 2146 | 4.10 |
| LOC_Os07g47940.1      | expressed protein                                                            | Chr7  | 28630523 | 28631018 - | 2  | 241  | 4.10 |
| LOC_Os02g12790.1      | GATA zinc finger domain containing protein, expressed                        | Chr2  | 6705604  | 6707734 -  | 3  | 1886 | 4.11 |

|                  |                                                                                                 |       |          |            |    |      |      |
|------------------|-------------------------------------------------------------------------------------------------|-------|----------|------------|----|------|------|
| LOC_Os04g31524.1 | expressed protein                                                                               | Chr4  | 18847020 | 18850779 - | 7  | 1456 | 4.11 |
| LOC_Os01g68010.2 | TBC domain containing protein, expressed                                                        | Chr1  | 39538143 | 39541096 - | 9  | 1606 | 4.11 |
| LOC_Os01g68010.1 | TBC domain containing protein, expressed                                                        | Chr1  | 39538143 | 39541096 - | 9  | 1599 | 4.11 |
| LOC_Os01g66720.1 | NADP-dependent oxidoreductase, putative, expressed                                              | Chr1  | 38752611 | 38754970 + | 5  | 1425 | 4.11 |
| LOC_Os02g13960.1 | spotted leaf 11, putative, expressed                                                            | Chr2  | 7612541  | 7615851 +  | 1  | 3343 | 4.11 |
| LOC_Os04g52890.1 | ATBAG1, putative, expressed                                                                     | Chr4  | 31497254 | 31502769 + | 4  | 1777 | 4.11 |
| LOC_Os04g52890.2 | ATBAG1, putative, expressed                                                                     | Chr4  | 31497254 | 31502769 + | 4  | 1771 | 4.11 |
| LOC_Os09g17750.2 | oxidoreductase, short chain dehydrogenase/reductase family domain containing protein, expressed | Chr9  | 10849736 | 10853196 - | 8  | 2303 | 4.11 |
| LOC_Os04g42134.1 | enhancer of rudimentary protein, putative, expressed                                            | Chr4  | 24943121 | 24945222 - | 3  | 1556 | 4.11 |
| LOC_Os10g35870.1 | cytochrome b5-like Heme/Steroid binding domain containing protein, expressed                    | Chr10 | 19171741 | 19174055 - | 2  | 1112 | 4.11 |
| LOC_Os10g34409.1 | transposon protein, putative, CACTA, En/Spm sub-class, expressed                                | Chr10 | 18353556 | 18354435 - | 1  | 912  | 4.11 |
| LOC_Os05g43490.1 | OsFBX169 - F-box domain containing protein, expressed                                           | Chr5  | 25283108 | 25286695 - | 2  | 1971 | 4.12 |
| LOC_Os12g04900.1 | retrotransposon protein, putative, Ty3-gypsy subclass, expressed                                | Chr12 | 2107319  | 2108275 +  | 1  | 989  | 4.12 |
| LOC_Os02g54030.1 | polygalacturonase, putative, expressed                                                          | Chr2  | 33097336 | 33098858 + | 3  | 1289 | 4.12 |
| LOC_Os01g54910.1 | GTP-binding protein typA/bipA, putative, expressed                                              | Chr1  | 31575708 | 31583605 + | 19 | 3280 | 4.12 |
| LOC_Os05g49740.1 | EMB2744, putative, expressed                                                                    | Chr5  | 28534151 | 28536925 - | 1  | 2807 | 4.12 |
| LOC_Os10g07150.2 | transposon protein, putative, unclassified, expressed                                           | Chr10 | 3750178  | 3752622 -  | 3  | 932  | 4.12 |
| LOC_Os02g09670.2 | MYB protein, putative, expressed                                                                | Chr2  | 4966920  | 4972531 +  | 4  | 871  | 4.12 |
| LOC_Os08g36710.1 | expressed protein                                                                               | Chr8  | 23160967 | 23163436 - | 4  | 2073 | 4.12 |
| LOC_Os09g09320.1 | nuclear transport factor, putative, expressed                                                   | Chr9  | 4988974  | 4991687 +  | 3  | 1499 | 4.12 |
| LOC_Os09g36110.1 | OsSub59 - Putative Subtilisin homologue, expressed                                              | Chr9  | 20794456 | 20797766 + | 11 | 2662 | 4.12 |
| LOC_Os12g25720.1 | expressed protein                                                                               | Chr12 | 14912243 | 14916625 - | 4  | 1810 | 4.12 |
| LOC_Os10g18150.1 | crooked neck, putative, expressed                                                               | Chr10 | 9212937  | 9215332 -  | 1  | 2428 | 4.12 |
| LOC_Os06g01050.1 | expressed protein                                                                               | Chr6  | 33589    | 37124 +    | 5  | 613  | 4.12 |
| LOC_Os02g44480.1 | pentatricopeptide, putative, expressed                                                          | Chr2  | 26922512 | 26924209 - | 1  | 1730 | 4.12 |
| LOC_Os10g04610.1 | OsFBX360 - F-box domain containing protein, expressed                                           | Chr10 | 2196559  | 2198967 +  | 1  | 2441 | 4.12 |
| LOC_Os02g05940.1 | phytosulfokine receptor precursor, putative, expressed                                          | Chr2  | 2952131  | 2955766 -  | 1  | 3668 | 4.12 |
| LOC_Os02g46910.1 | glycosyl hydrolases family 16, putative, expressed                                              | Chr2  | 28621982 | 28624683 + | 4  | 1994 | 4.12 |
| LOC_Os08g12780.5 | chloroplast envelope membrane protein, putative, expressed                                      | Chr8  | 7571731  | 7574295 -  | 5  | 1208 | 4.12 |
| LOC_Os02g08490.1 | chaperone protein clpB 1, putative, expressed                                                   | Chr2  | 4567617  | 4573049 -  | 10 | 3633 | 4.13 |
| LOC_Os12g06060.1 | amino acid permease family protein, putative, expressed                                         | Chr12 | 2816374  | 2822877 +  | 5  | 1768 | 4.13 |
| LOC_Os02g05230.1 | retrotransposon protein, putative, unclassified, expressed                                      | Chr2  | 2506009  | 2509048 -  | 4  | 2930 | 4.13 |
| LOC_Os09g25720.1 | glycine-rich cell wall structural protein 2 precursor, putative, expressed                      | Chr9  | 15430580 | 15431378 + | 1  | 831  | 4.13 |
| LOC_Os03g10350.1 | NPGR1, putative, expressed                                                                      | Chr3  | 5276864  | 5281819 -  | 6  | 3398 | 4.13 |
| LOC_Os09g32600.1 | OsFBX334 - F-box domain containing protein, expressed                                           | Chr9  | 19454864 | 19457637 - | 5  | 1707 | 4.13 |
| LOC_Os04g47720.1 | cis-zeatin O-glucosyltransferase, putative, expressed                                           | Chr4  | 28315067 | 28316878 + | 1  | 1844 | 4.13 |
| LOC_Os12g12380.3 | transposon protein, putative, unclassified, expressed                                           | Chr12 | 6816934  | 6820419 -  | 3  | 2769 | 4.13 |
| LOC_Os01g55974.2 | deoxycytidylate deaminase, putative, expressed                                                  | Chr1  | 32233035 | 32238980 - | 10 | 1375 | 4.13 |
| LOC_Os04g07600.1 | AGAP002737-PA, putative, expressed                                                              | Chr4  | 4039853  | 4042102 +  | 2  | 2227 | 4.13 |
| LOC_Os05g39850.1 | MCM3 - Putative minichromosome maintenance MCM complex subunit 3, expressed                     | Chr5  | 23419593 | 23424596 + | 16 | 3213 | 4.13 |
| LOC_Os08g05280.1 | oxidoreductase family, NAD-binding Rossmann fold containing protein, expressed                  | Chr8  | 2756966  | 2765155 -  | 12 | 2922 | 4.13 |
| LOC_Os12g07590.1 | Protein-tyrosine phosphatase domain containing protein, expressed                               | Chr12 | 3792110  | 3797497 -  | 9  | 1835 | 4.13 |
| LOC_Os12g43000.2 | retrotransposon protein, putative, unclassified, expressed                                      | Chr12 | 26715379 | 26718178 - | 7  | 1801 | 4.13 |
| LOC_Os04g50740.1 | ara54-like RING finger protein, putative, expressed                                             | Chr4  | 30016919 | 30021073 + | 7  | 2263 | 4.13 |
| LOC_Os01g36540.1 | pentatricopeptide, putative, expressed                                                          | Chr1  | 20280855 | 20282564 + | 1  | 1742 | 4.13 |

|                  |                                                                         |       |          |            |    |      |      |
|------------------|-------------------------------------------------------------------------|-------|----------|------------|----|------|------|
| LOC_Os04g52520.2 | APO, putative, expressed                                                | Chr4  | 31226045 | 31230567 + | 8  | 2034 | 4.13 |
| LOC_Os09g32580.1 | expressed protein                                                       | Chr9  | 19445271 | 19448189 - | 5  | 2196 | 4.13 |
| LOC_Os06g21710.1 | retrotransposon protein, putative, Ty3-gypsy subclass, expressed        | Chr6  | 12549751 | 12553501 - | 4  | 1770 | 4.13 |
| LOC_Os03g50364.1 | expressed protein                                                       | Chr3  | 28744729 | 28746317 - | 3  | 1467 | 4.14 |
| LOC_Os09g36250.1 | MYB family transcription factor, putative, expressed                    | Chr9  | 20915301 | 20919808 - | 2  | 1643 | 4.14 |
| LOC_Os05g29974.2 | lipase, putative, expressed                                             | Chr5  | 17336715 | 17342967 + | 7  | 1399 | 4.14 |
| LOC_Os07g48840.2 | Ser/Thr protein phosphatase family protein, putative, expressed         | Chr7  | 29225276 | 29227666 + | 2  | 1762 | 4.14 |
| LOC_Os04g31940.1 | dnaj domain containing protein, expressed                               | Chr4  | 19130179 | 19133059 + | 1  | 2913 | 4.14 |
| LOC_Os08g42020.1 | zinc ion binding protein, putative, expressed                           | Chr8  | 26543220 | 26545477 + | 1  | 2290 | 4.14 |
| LOC_Os03g16790.3 | DHHC zinc finger domain containing protein, expressed                   | Chr3  | 9307510  | 9312680 +  | 9  | 2314 | 4.14 |
| LOC_Os07g45610.1 | retrotransposon protein, putative, Ty3-gypsy subclass, expressed        | Chr7  | 27216125 | 27226912 + | 5  | 5593 | 4.14 |
| LOC_Os06g29640.1 | retrotransposon protein, putative, unclassified, expressed              | Chr6  | 16999914 | 17000908 + | 2  | 898  | 4.15 |
| LOC_Os03g12930.1 | expressed protein                                                       | Chr3  | 6974761  | 6978108 -  | 3  | 1190 | 4.15 |
| LOC_Os03g12930.2 | expressed protein                                                       | Chr3  | 6974761  | 6978108 -  | 3  | 1156 | 4.15 |
| LOC_Os02g56440.1 | expressed protein                                                       | Chr2  | 34559238 | 34560374 - | 1  | 1169 | 4.15 |
| LOC_Os08g06280.9 | LSD1 zinc finger domain containing protein, expressed                   | Chr8  | 3460710  | 3463827 -  | 4  | 1817 | 4.15 |
| LOC_Os04g47020.3 | genetic modifier, putative, expressed                                   | Chr4  | 27868084 | 27870370 + | 3  | 1515 | 4.15 |
| LOC_Os04g47020.1 | genetic modifier, putative, expressed                                   | Chr4  | 27868084 | 27870370 + | 2  | 1560 | 4.15 |
| LOC_Os02g58550.2 | chloroplast channel forming outer membrane protein, putative, expressed | Chr2  | 35785868 | 35787820 - | 4  | 1050 | 4.15 |
| LOC_Os09g07660.1 | ELMO/CED-12 family protein, putative, expressed                         | Chr9  | 3855460  | 3862968 +  | 18 | 3159 | 4.15 |
| LOC_Os09g06570.1 | expressed protein                                                       | Chr9  | 3126602  | 3127160 -  | 1  | 591  | 4.15 |
| LOC_Os01g66630.1 | S-domain receptor-like protein kinase, putative, expressed              | Chr1  | 38699042 | 38701558 + | 4  | 1739 | 4.15 |
| LOC_Os12g32210.1 | autophagy-related protein 10, putative, expressed                       | Chr12 | 19441176 | 19447196 + | 9  | 1667 | 4.15 |
| LOC_Os11g13940.1 | NBS-LRR disease resistance protein, putative, expressed                 | Chr11 | 7712006  | 7717010 -  | 2  | 3523 | 4.15 |
| LOC_Os04g07700.1 | retrotransposon protein, putative, Ty3-gypsy subclass                   | Chr4  | 4094808  | 4095608 +  | 1  | 833  | 4.15 |
| LOC_Os04g03470.1 | retrotransposon protein, putative, unclassified, expressed              | Chr4  | 1498934  | 1504186 +  | 5  | 4621 | 4.15 |
| LOC_Os06g04190.1 | rad1, putative, expressed                                               | Chr6  | 1758960  | 1760884 -  | 7  | 1260 | 4.15 |
| LOC_Os03g53750.1 | nuclear prelamin A recognition factor, putative, expressed              | Chr3  | 30810265 | 30814716 - | 11 | 2230 | 4.15 |
| LOC_Os03g53750.2 | nuclear prelamin A recognition factor, putative, expressed              | Chr3  | 30810265 | 30814716 - | 11 | 2213 | 4.15 |
| LOC_Os04g52410.1 | OsMADS31 - MADS-box family gene with MIKCC type-box, expressed          | Chr4  | 31143100 | 31144202 + | 4  | 689  | 4.15 |
| LOC_Os03g10210.1 | homeobox domain containing protein, expressed                           | Chr3  | 5180655  | 5182185 -  | 3  | 1387 | 4.15 |
| LOC_Os08g44650.1 | expressed protein                                                       | Chr8  | 28074869 | 28077136 - | 3  | 1122 | 4.15 |
| LOC_Os09g03610.2 | flowering time control protein FCA, putative, expressed                 | Chr9  | 1790446  | 1799611 +  | 17 | 3901 | 4.15 |
| LOC_Os09g03610.4 | flowering time control protein FCA, putative, expressed                 | Chr9  | 1790600  | 1799611 +  | 18 | 3399 | 4.15 |
| LOC_Os09g03610.1 | flowering time control protein FCA, putative, expressed                 | Chr9  | 1790600  | 1799611 +  | 18 | 3377 | 4.15 |
| LOC_Os09g03610.3 | flowering time control protein FCA, putative, expressed                 | Chr9  | 1790608  | 1799611 +  | 18 | 3351 | 4.15 |
| LOC_Os11g36960.1 | dnaj domain containing protein, expressed                               | Chr11 | 21806099 | 21809530 + | 1  | 3464 | 4.16 |
| LOC_Os04g43670.1 | expressed protein                                                       | Chr4  | 25835625 | 25837777 + | 2  | 1027 | 4.16 |
| LOC_Os05g04650.1 | expressed protein                                                       | Chr5  | 2194869  | 2196468 +  | 4  | 984  | 4.16 |
| LOC_Os09g25600.1 | AP2 domain containing protein, expressed                                | Chr9  | 15364891 | 15369757 + | 7  | 2008 | 4.16 |
| LOC_Os01g19630.4 | expressed protein                                                       | Chr1  | 11129520 | 11131876 + | 3  | 1903 | 4.16 |
| LOC_Os01g65350.1 | deoxynucleoside kinase family, putative, expressed                      | Chr1  | 37914757 | 37918965 - | 5  | 2160 | 4.16 |
| LOC_Os08g18820.1 | zinc knuckle family protein, expressed                                  | Chr8  | 11223774 | 11233240 + | 2  | 7492 | 4.16 |
| LOC_Os04g28234.3 | Rf1, mitochondrial precursor, putative, expressed                       | Chr4  | 16684906 | 16693432 + | 3  | 4199 | 4.16 |
| LOC_Os05g37884.1 | 50S ribosomal protein L33, putative, expressed                          | Chr5  | 22198314 | 22199542 + | 2  | 775  | 4.16 |

|                  |                                                                           |       |          |            |    |      |      |
|------------------|---------------------------------------------------------------------------|-------|----------|------------|----|------|------|
| LOC_Os03g07310.1 | growth regulator related protein, putative, expressed                     | Chr3  | 3717384  | 3721105 -  | 8  | 2137 | 4.16 |
| LOC_Os01g72970.1 | DUF630/DUF632 domains containing protein, putative, expressed             | Chr1  | 42325823 | 42329066 + | 4  | 3048 | 4.16 |
| LOC_Os02g10160.1 | AGAP003371-PA, putative, expressed                                        | Chr2  | 5324532  | 5328301 -  | 6  | 1978 | 4.16 |
| LOC_Os03g62630.1 | ribosomal protein S6, putative, expressed                                 | Chr3  | 35444418 | 35446363 + | 2  | 1119 | 4.16 |
| LOC_Os05g36150.1 | Yip1 domain containing protein, expressed                                 | Chr5  | 21427652 | 21431594 - | 3  | 1311 | 4.16 |
| LOC_Os07g06490.1 | DNA binding protein, putative, expressed                                  | Chr7  | 3149943  | 3152648 -  | 2  | 2036 | 4.16 |
| LOC_Os01g48320.1 | transcription factor like protein, putative, expressed                    | Chr1  | 27690411 | 27692209 - | 1  | 1831 | 4.16 |
| LOC_Os03g16790.2 | DHHC zinc finger domain containing protein, expressed                     | Chr3  | 9307510  | 9312680 +  | 10 | 2412 | 4.16 |
| LOC_Os04g34110.1 | retrotransposon protein, putative, unclassified, expressed                | Chr4  | 20674053 | 20678365 + | 5  | 3067 | 4.16 |
| LOC_Os12g12380.1 | transposon protein, putative, unclassified, expressed                     | Chr12 | 6816937  | 6820419 -  | 2  | 3429 | 4.16 |
| LOC_Os10g28340.1 | heat stress transcription factor, putative, expressed                     | Chr10 | 14746825 | 14750175 - | 2  | 1746 | 4.16 |
| LOC_Os11g40110.1 | RWP-RK, putative, expressed                                               | Chr11 | 23926033 | 23929039 - | 3  | 846  | 4.16 |
| LOC_Os12g04610.1 | expressed protein                                                         | Chr12 | 1949570  | 1952621 -  | 4  | 2569 | 4.16 |
| LOC_Os08g40890.1 | spermidine synthase-related, putative, expressed                          | Chr8  | 25867085 | 25870277 - | 1  | 3225 | 4.16 |
| LOC_Os05g40950.1 | pentatricopeptide repeat-containing protein, putative, expressed          | Chr5  | 24013453 | 24014600 + | 1  | 1180 | 4.16 |
| LOC_Os08g44180.1 | expressed protein                                                         | Chr8  | 27811017 | 27814357 + | 9  | 1395 | 4.16 |
| LOC_Os08g38990.1 | WRKY30, expressed                                                         | Chr8  | 24645860 | 24649832 - | 6  | 2616 | 4.16 |
| LOC_Os04g46380.1 | expressed protein                                                         | Chr4  | 27498110 | 27498747 + | 2  | 604  | 4.16 |
| LOC_Os09g28590.3 | AGAP010609-PA, putative, expressed                                        | Chr9  | 17393569 | 17395622 + | 3  | 1224 | 4.16 |
| LOC_Os06g36490.1 | ethylene-responsive element-binding protein, putative, expressed          | Chr6  | 21431258 | 21435702 - | 4  | 1290 | 4.17 |
| LOC_Os08g27100.1 | expressed protein                                                         | Chr8  | 16559436 | 16560579 + | 3  | 888  | 4.17 |
| LOC_Os02g57510.3 | SNARE domain containing protein, putative, expressed                      | Chr2  | 35234147 | 35238028 + | 6  | 1218 | 4.17 |
| LOC_Os02g57510.4 | SNARE domain containing protein, putative, expressed                      | Chr2  | 35234126 | 35238028 + | 6  | 1232 | 4.17 |
| LOC_Os03g18970.1 | protein phosphatase protein, putative, expressed                          | Chr3  | 10621702 | 10625411 - | 7  | 2249 | 4.17 |
| LOC_Os06g05600.1 | OsFBDUF31 - F-box and DUF domain containing protein, expressed            | Chr6  | 2535324  | 2537022 +  | 1  | 1731 | 4.17 |
| LOC_Os02g57510.1 | SNARE domain containing protein, putative, expressed                      | Chr2  | 35234126 | 35238028 + | 6  | 1251 | 4.17 |
| LOC_Os02g57510.2 | SNARE domain containing protein, putative, expressed                      | Chr2  | 35234126 | 35238028 + | 6  | 1244 | 4.17 |
| LOC_Os03g49800.1 | phosphatidylinositol-4-phosphate 5-kinase, putative, expressed            | Chr3  | 28358095 | 28362611 - | 8  | 3246 | 4.17 |
| LOC_Os01g09252.1 | WD domain, G-beta repeat domain containing protein, expressed             | Chr1  | 4688108  | 4693114 +  | 6  | 2397 | 4.17 |
| LOC_Os02g50230.1 | peptidase, putative, expressed                                            | Chr2  | 30669185 | 30673105 + | 3  | 2072 | 4.17 |
| LOC_Os09g07660.2 | ELMO/CED-12 family protein, putative, expressed                           | Chr9  | 3855216  | 3862968 +  | 18 | 3265 | 4.17 |
| LOC_Os01g58035.1 | expressed protein                                                         | Chr1  | 33567103 | 33567405 + | 1  | 335  | 4.17 |
| LOC_Os08g42320.1 | expressed protein                                                         | Chr8  | 26713274 | 26716439 - | 3  | 2695 | 4.17 |
| LOC_Os02g05870.1 | expressed protein                                                         | Chr2  | 2898892  | 2903751 -  | 8  | 1733 | 4.17 |
| LOC_Os08g29660.1 | WRKY69, expressed                                                         | Chr8  | 18220041 | 18222408 + | 2  | 2338 | 4.17 |
| LOC_Os03g38745.1 | serine/arginine repetitive matrix protein 1, putative, expressed          | Chr3  | 21520109 | 21522077 - | 2  | 1460 | 4.18 |
| LOC_Os07g37270.1 | MSP domain containing protein, putative, expressed                        | Chr7  | 22333881 | 22338439 + | 7  | 1627 | 4.18 |
| LOC_Os10g39950.1 | viral A-type inclusion protein repeat containing protein, expressed       | Chr10 | 21389826 | 21399532 - | 9  | 5545 | 4.18 |
| LOC_Os02g26814.5 | UDP-N-acetylglucosamine transferase subunit ALG13, putative, expressed    | Chr2  | 15741292 | 15742976 + | 2  | 776  | 4.18 |
| LOC_Os06g23790.1 | expressed protein                                                         | Chr6  | 13900584 | 13901962 - | 3  | 1283 | 4.18 |
| LOC_Os02g38574.1 | EMB2423, putative, expressed                                              | Chr2  | 23324961 | 23326159 + | 3  | 765  | 4.18 |
| LOC_Os03g19200.1 | DNAJ heat shock N-terminal domain-containing protein, putative, expressed | Chr3  | 10772280 | 10775798 - | 3  | 3043 | 4.18 |
| LOC_Os01g51210.1 | uncharacterized protein PA4923, putative, expressed                       | Chr1  | 29437276 | 29439882 - | 7  | 1388 | 4.18 |
| LOC_Os01g16620.4 | expressed protein                                                         | Chr1  | 9431735  | 9435957 -  | 5  | 1712 | 4.18 |
| LOC_Os07g09140.1 | expressed protein                                                         | Chr7  | 4773048  | 4774450 +  | 2  | 1007 | 4.18 |

|                  |                                                                                                    |       |          |            |    |      |      |
|------------------|----------------------------------------------------------------------------------------------------|-------|----------|------------|----|------|------|
| LOC_Os07g09140.2 | expressed protein                                                                                  | Chr7  | 4773051  | 4774450 +  | 3  | 1097 | 4.18 |
| LOC_Os03g38950.1 | chloroplast post-illumination chlorophyll fluorescence increase protein, putative, expressed       | Chr3  | 21634867 | 21637243 + | 7  | 1485 | 4.18 |
| LOC_Os03g38950.2 | chloroplast post-illumination chlorophyll fluorescence increase protein, putative, expressed       | Chr3  | 21634872 | 21637243 + | 6  | 1530 | 4.18 |
| LOC_Os07g32230.2 | domain of unknown function domain containing protein, expressed                                    | Chr7  | 19162340 | 19165067 - | 4  | 1047 | 4.18 |
| LOC_Os02g50270.1 | ankyrin repeat-containing protein, putative, expressed                                             | Chr2  | 30695324 | 30698401 + | 3  | 2076 | 4.18 |
| LOC_Os01g05450.1 | expressed protein                                                                                  | Chr1  | 2573049  | 2574201 -  | 3  | 597  | 4.18 |
| LOC_Os08g30910.1 | YDG/SRA domain containing protein, expressed                                                       | Chr8  | 19085505 | 19089497 + | 2  | 3943 | 4.19 |
| LOC_Os06g23790.2 | expressed protein                                                                                  | Chr6  | 13900584 | 13901962 - | 3  | 1315 | 4.19 |
| LOC_Os06g22660.2 | EMB1303, putative, expressed                                                                       | Chr6  | 13177537 | 13181742 + | 5  | 1016 | 4.19 |
| LOC_Os06g22660.1 | EMB1303, putative, expressed                                                                       | Chr6  | 13177537 | 13181742 + | 5  | 1040 | 4.19 |
| LOC_Os05g08854.2 | expressed protein                                                                                  | Chr5  | 4886631  | 4890243 -  | 4  | 1762 | 4.19 |
| LOC_Os10g22590.1 | POEI24 - Pollen Ole e l allergen and extensin family protein precursor, expressed                  | Chr10 | 11723419 | 11726426 + | 2  | 983  | 4.19 |
| LOC_Os01g19630.2 | expressed protein                                                                                  | Chr1  | 11129520 | 11131876 + | 4  | 2027 | 4.19 |
| LOC_Os01g19630.3 | expressed protein                                                                                  | Chr1  | 11129520 | 11131876 + | 4  | 2032 | 4.19 |
| LOC_Os01g19630.1 | expressed protein                                                                                  | Chr1  | 11129421 | 11131876 + | 4  | 2096 | 4.19 |
| LOC_Os04g36640.1 | dehydration-responsive element-binding protein, putative, expressed                                | Chr4  | 21362368 | 21365387 - | 6  | 993  | 4.19 |
| LOC_Os06g05250.3 | GTP-binding protein GUF1, putative, expressed                                                      | Chr6  | 2368985  | 2372121 -  | 8  | 2143 | 4.19 |
| LOC_Os06g42660.1 | expressed protein                                                                                  | Chr6  | 25655524 | 25656230 + | 1  | 739  | 4.19 |
| LOC_Os09g36020.1 | EAP30/Vps36 family domain containing protein, expressed                                            | Chr9  | 20745079 | 20748932 - | 7  | 797  | 4.19 |
| LOC_Os01g64340.1 | expressed protein                                                                                  | Chr1  | 37352263 | 37352667 + | 1  | 437  | 4.19 |
| LOC_Os04g53550.1 | ABC transporter, ATP-binding protein, putative, expressed                                          | Chr4  | 31925655 | 31928596 - | 4  | 1070 | 4.19 |
| LOC_Os03g18360.1 | BTBT1 - Bric-a-Brac, Tramtrack, Broad Complex BTB domain with tetratricopeptide repeats, expressed | Chr3  | 10286812 | 10291004 + | 4  | 3005 | 4.19 |
| LOC_Os12g31460.1 | heat shock protein DnaJ, putative, expressed                                                       | Chr12 | 18918230 | 18920690 - | 5  | 1119 | 4.19 |
| LOC_Os01g37690.2 | sodium/calcium exchanger protein, putative, expressed                                              | Chr1  | 21072230 | 21073919 - | 5  | 1225 | 4.19 |
| LOC_Os10g33000.1 | retrotransposon protein, putative, unclassified, expressed                                         | Chr10 | 17276945 | 17279876 + | 8  | 2359 | 4.19 |
| LOC_Os11g06230.1 | expressed protein                                                                                  | Chr11 | 2978428  | 2981561 +  | 2  | 2251 | 4.19 |
| LOC_Os03g03860.3 | expressed protein                                                                                  | Chr3  | 1737298  | 1742634 -  | 6  | 4006 | 4.19 |
| LOC_Os03g03860.1 | expressed protein                                                                                  | Chr3  | 1737298  | 1742634 -  | 6  | 4021 | 4.19 |
| LOC_Os04g45180.1 | EF hand family protein, expressed                                                                  | Chr4  | 26709264 | 26712512 + | 6  | 1429 | 4.19 |
| LOC_Os04g33330.1 | expressed protein                                                                                  | Chr4  | 20187930 | 20189402 - | 3  | 853  | 4.19 |
| LOC_Os05g32640.1 | expressed protein                                                                                  | Chr5  | 19115148 | 19115597 + | 1  | 482  | 4.20 |
| LOC_Os04g17650.1 | sucrose synthase, putative, expressed                                                              | Chr4  | 9661934  | 9667057 -  | 16 | 3145 | 4.20 |
| LOC_Os01g15490.2 | phosphoadenosine phosphosulfate, putative, expressed                                               | Chr1  | 8701159  | 8708630 -  | 16 | 2787 | 4.20 |
| LOC_Os01g15490.1 | phosphoadenosine phosphosulfate, putative, expressed                                               | Chr1  | 8701159  | 8708630 -  | 16 | 2796 | 4.20 |
| LOC_Os07g05440.2 | retrotransposon protein, putative, unclassified, expressed                                         | Chr7  | 2502663  | 2507764 +  | 2  | 4684 | 4.20 |
| LOC_Os08g32120.1 | expressed protein                                                                                  | Chr8  | 19928656 | 19929307 + | 2  | 621  | 4.20 |
| LOC_Os03g22680.2 | RING finger and CHY zinc finger domain-containing protein 1, putative, expressed                   | Chr3  | 13095806 | 13098285 - | 11 | 1586 | 4.20 |
| LOC_Os04g50730.1 | RWD domain containing protein, expressed                                                           | Chr4  | 30012117 | 30016413 + | 6  | 2658 | 4.20 |
| LOC_Os06g20320.1 | peptidyl-prolyl cis-trans isomerase, FKBP-type, putative, expressed                                | Chr6  | 11676953 | 11682092 + | 13 | 2439 | 4.20 |
| LOC_Os01g09550.3 | no apical meristem protein, putative, expressed                                                    | Chr1  | 4879207  | 4885949 -  | 6  | 3209 | 4.20 |
| LOC_Os11g34690.1 | expressed protein                                                                                  | Chr11 | 20321331 | 20326421 + | 9  | 3254 | 4.20 |
| LOC_Os05g18730.1 | generative cell specific-1, putative, expressed                                                    | Chr5  | 10847748 | 10854702 - | 18 | 3063 | 4.20 |
| LOC_Os06g36210.1 | amino acid transporter, putative, expressed                                                        | Chr6  | 21208192 | 21214381 + | 3  | 2474 | 4.21 |
| LOC_Os11g01220.1 | expressed protein                                                                                  | Chr11 | 129995   | 134454 -   | 12 | 3116 | 4.21 |
| LOC_Os09g33780.1 | expressed protein                                                                                  | Chr9  | 19943524 | 19948721 + | 8  | 1908 | 4.21 |

|                  |                                                                                                |       |          |            |    |      |      |
|------------------|------------------------------------------------------------------------------------------------|-------|----------|------------|----|------|------|
| LOC_Os09g14614.1 | serine/arginine repetitive matrix protein 1, putative, expressed                               | Chr9  | 8665902  | 8667873 -  | 2  | 1463 | 4.21 |
| LOC_Os10g41190.2 | transporter family protein, putative, expressed                                                | Chr10 | 22124277 | 22127825 + | 2  | 2596 | 4.21 |
| LOC_Os03g51840.1 | PPR repeat containing protein, expressed                                                       | Chr3  | 29730344 | 29732399 + | 1  | 2088 | 4.21 |
| LOC_Os03g03334.1 | expressed protein                                                                              | Chr3  | 1427658  | 1428154 +  | 1  | 529  | 4.21 |
| LOC_Os03g64370.1 | pentatricopeptide, putative, expressed                                                         | Chr3  | 36384991 | 36386913 + | 1  | 1955 | 4.21 |
| LOC_Os03g63420.1 | OsGrx_S14 - glutaredoxin subgroup II, expressed                                                | Chr3  | 35830359 | 35832570 + | 2  | 1006 | 4.22 |
| LOC_Os01g37837.1 | seryl-tRNA synthetase, putative, expressed                                                     | Chr1  | 21175744 | 21179966 + | 10 | 2275 | 4.22 |
| LOC_Os10g33820.1 | expressed protein                                                                              | Chr10 | 17938977 | 17940533 - | 1  | 1589 | 4.22 |
| LOC_Os01g70490.1 | potassium transporter, putative, expressed                                                     | Chr1  | 40825681 | 40830301 + | 9  | 3045 | 4.22 |
| LOC_Os11g14900.3 | thiol protease SEN102 precursor, putative, expressed                                           | Chr11 | 8379377  | 8382036 -  | 5  | 1621 | 4.22 |
| LOC_Os10g27030.1 | retrotransposon protein, putative, unclassified, expressed                                     | Chr10 | 14241989 | 14244875 + | 4  | 2735 | 4.22 |
| LOC_Os12g37140.1 | retrotransposon protein, putative, Ty3-gypsy subclass, expressed                               | Chr12 | 22760485 | 22765508 + | 6  | 1188 | 4.22 |
| LOC_Os01g06450.1 | glycosyltransferase family 43 protein, putative, expressed                                     | Chr1  | 3039298  | 3041232 +  | 3  | 1746 | 4.22 |
| LOC_Os12g03601.1 | expressed protein                                                                              | Chr12 | 1445553  | 1446381 -  | 3  | 730  | 4.22 |
| LOC_Os12g10040.1 | retrotransposon protein, putative, Ty3-gypsy subclass                                          | Chr12 | 5317468  | 5321891 +  | 3  | 1110 | 4.22 |
| LOC_Os05g48260.1 | wax synthase, putative, expressed                                                              | Chr5  | 27660691 | 27664964 + | 7  | 2241 | 4.22 |
| LOC_Os06g05140.1 | pentatricopeptide, putative, expressed                                                         | Chr6  | 2282572  | 2284863 +  | 1  | 2324 | 4.22 |
| LOC_Os08g06840.1 | expressed protein                                                                              | Chr8  | 3819022  | 3820090 -  | 1  | 1101 | 4.22 |
| LOC_Os03g18170.1 | STE_MEKK_ste11_MAP3K.13 - STE kinases include homologs to sterile 7, sterile 11 and sterile 20 | Chr3  | 10184582 | 10187474 + | 4  | 1664 | 4.22 |
| LOC_Os09g10790.1 | retrotransposon protein, putative, unclassified, expressed                                     | Chr9  | 5888125  | 5890572 -  | 6  | 1905 | 4.22 |
| LOC_Os10g42240.1 | kinase, pfkB family, putative, expressed                                                       | Chr10 | 22750204 | 22753105 + | 5  | 2017 | 4.22 |
| LOC_Os10g42240.2 | kinase, pfkB family, putative, expressed                                                       | Chr10 | 22750204 | 22753105 + | 4  | 2231 | 4.22 |
| LOC_Os03g09940.1 | sulfate transporter, putative, expressed                                                       | Chr3  | 4954101  | 4959448 -  | 12 | 3061 | 4.22 |
| LOC_Os01g37837.2 | seryl-tRNA synthetase, putative, expressed                                                     | Chr1  | 21175744 | 21179966 + | 9  | 2326 | 4.22 |
| LOC_Os03g47240.1 | expressed protein                                                                              | Chr3  | 26732768 | 26735887 + | 3  | 621  | 4.22 |
| LOC_Os05g39050.1 | Core histone H2A/H2B/H3/H4 domain containing protein, putative, expressed                      | Chr5  | 22903108 | 22903946 + | 1  | 871  | 4.22 |
| LOC_Os01g56960.1 | acid phosphatase, putative, expressed                                                          | Chr1  | 32903910 | 32905663 - | 7  | 1268 | 4.22 |
| LOC_Os10g32830.1 | kinase, pfkB family, putative, expressed                                                       | Chr10 | 17186606 | 17189893 + | 12 | 1479 | 4.22 |
| LOC_Os03g22040.1 | expressed protein                                                                              | Chr3  | 12627290 | 12630390 + | 2  | 2165 | 4.22 |
| LOC_Os04g50760.1 | ara54-like RING finger protein, putative, expressed                                            | Chr4  | 30022736 | 30026167 - | 7  | 2307 | 4.22 |
| LOC_Os01g64290.1 | expressed protein                                                                              | Chr1  | 37321895 | 37323504 + | 3  | 1541 | 4.22 |
| LOC_Os09g31120.1 | pirin, putative, expressed                                                                     | Chr9  | 18707883 | 18710315 + | 4  | 1618 | 4.22 |
| LOC_Os10g05940.1 | expressed protein                                                                              | Chr10 | 2995396  | 2998062 +  | 3  | 778  | 4.22 |
| LOC_Os07g33420.1 | hydroxylase, putative, expressed                                                               | Chr7  | 19975537 | 19981363 - | 6  | 2155 | 4.22 |
| LOC_Os08g04790.1 | xylosyltransferase, putative, expressed                                                        | Chr8  | 2389729  | 2393042 +  | 4  | 1898 | 4.22 |
| LOC_Os01g59510.1 | chloroplast ribonuclease III domain protein, putative, expressed                               | Chr1  | 34412853 | 34416988 - | 5  | 2325 | 4.23 |
| LOC_Os01g04130.1 | peptidyl-tRNA hydrolase, mitochondrial precursor protein, putative, expressed                  | Chr1  | 1815769  | 1817554 -  | 4  | 575  | 4.23 |
| LOC_Os01g32350.3 | OsClp2 - Putative Clp protease homologue, expressed                                            | Chr1  | 17746363 | 17751130 + | 3  | 988  | 4.23 |
| LOC_Os08g14320.1 | zinc finger, C3HC4 type domain containing protein, expressed                                   | Chr8  | 8582061  | 8584105 +  | 4  | 1413 | 4.23 |
| LOC_Os04g57780.2 | tetratricopeptide repeat domain containing protein, expressed                                  | Chr4  | 34411231 | 34413183 - | 4  | 1277 | 4.23 |
| LOC_Os03g09260.1 | ubiquitin carboxyl-terminal hydrolase 26, putative, expressed                                  | Chr3  | 4836142  | 4838183 +  | 4  | 1383 | 4.23 |
| LOC_Os02g15220.1 | bromodomain containing protein, expressed                                                      | Chr2  | 8490392  | 8498390 +  | 5  | 3174 | 4.23 |
| LOC_Os05g45270.1 | ribosomal L9, putative, expressed                                                              | Chr5  | 26276599 | 26279411 + | 6  | 1198 | 4.23 |
| LOC_Os03g16790.1 | DHHC zinc finger domain containing protein, expressed                                          | Chr3  | 9307510  | 9312680 +  | 11 | 2346 | 4.23 |
| LOC_Os02g15220.4 | bromodomain containing protein, expressed                                                      | Chr2  | 8490618  | 8498390 +  | 4  | 3028 | 4.23 |

|                  |                                                                                     |       |          |            |    |      |      |
|------------------|-------------------------------------------------------------------------------------|-------|----------|------------|----|------|------|
| LOC_Os02g15220.2 | bromodomain containing protein, expressed                                           | Chr2  | 8490392  | 8498390 +  | 5  | 3178 | 4.23 |
| LOC_Os11g02860.1 | expressed protein                                                                   | Chr11 | 969861   | 970384 -   | 2  | 547  | 4.24 |
| LOC_Os04g52540.1 | retrotransposon protein, putative, unclassified, expressed                          | Chr4  | 31239185 | 31243433 + | 3  | 3574 | 4.24 |
| LOC_Os01g67560.1 | Divergent PAP2 family domain containing protein, expressed                          | Chr1  | 39266781 | 39269619 - | 5  | 1331 | 4.24 |
| LOC_Os08g04300.1 | fringe-related protein, putative, expressed                                         | Chr8  | 2108300  | 2112134 +  | 3  | 2511 | 4.24 |
| LOC_Os02g08530.1 | protein kinase family protein, putative, expressed                                  | Chr2  | 4604012  | 4607666 -  | 10 | 2431 | 4.25 |
| LOC_Os01g22670.1 | fruit bromelain precursor, putative, expressed                                      | Chr1  | 12745130 | 12747081 - | 2  | 1927 | 4.25 |
| LOC_Os05g03630.1 | dnaJ domain containing protein, expressed                                           | Chr5  | 1553433  | 1557251 +  | 3  | 1453 | 4.25 |
| LOC_Os05g32270.2 | AP2 domain containing protein, expressed                                            | Chr5  | 18813472 | 18817699 + | 8  | 1542 | 4.25 |
| LOC_Os05g25890.1 | expressed protein                                                                   | Chr5  | 15061485 | 15066256 + | 1  | 4804 | 4.25 |
| LOC_Os09g19890.2 | expressed protein                                                                   | Chr9  | 11904341 | 11908232 + | 3  | 2339 | 4.25 |
| LOC_Os07g32910.1 | transposon protein, putative, unclassified, expressed                               | Chr7  | 19674068 | 19680433 - | 10 | 5250 | 4.25 |
| LOC_Os01g59620.1 | histone-lysine N-methyltransferase, H3 lysine-9 specific SUVH1, putative, expressed | Chr1  | 34480551 | 34484984 + | 3  | 3041 | 4.25 |
| LOC_Os07g04150.1 | stress-induced protein, putative, expressed                                         | Chr7  | 1770641  | 1772559 -  | 2  | 1900 | 4.25 |
| LOC_Os01g26020.1 | expressed protein                                                                   | Chr1  | 14752089 | 14754630 + | 3  | 1087 | 4.25 |
| LOC_Os04g25540.1 | ribosomal protein L27, putative, expressed                                          | Chr4  | 14804703 | 14805724 + | 3  | 799  | 4.25 |
| LOC_Os02g03730.1 | SWIB/MDM2 domain containing protein, expressed                                      | Chr2  | 1563393  | 1565446 -  | 2  | 956  | 4.25 |
| LOC_Os04g43440.1 | NB-ARC/LRR disease resistance protein, putative, expressed                          | Chr4  | 25708299 | 25712533 - | 3  | 2973 | 4.25 |
| LOC_Os09g20240.2 | DUF581 domain containing protein, expressed                                         | Chr9  | 12126818 | 12128189 + | 2  | 967  | 4.25 |
| LOC_Os05g19470.6 | expressed protein                                                                   | Chr5  | 11314399 | 11319175 + | 4  | 811  | 4.25 |
| LOC_Os05g19470.3 | expressed protein                                                                   | Chr5  | 11314367 | 11319175 + | 5  | 969  | 4.25 |
| LOC_Os01g61560.1 | phosphatidate cytidyltransferase, putative, expressed                               | Chr1  | 35601031 | 35604029 - | 6  | 1370 | 4.25 |
| LOC_Os01g37670.1 | OsFBX15 - F-box domain containing protein, expressed                                | Chr1  | 21068507 | 21070217 + | 1  | 1743 | 4.25 |
| LOC_Os02g27490.1 | bile acid sodium symporter family protein, putative, expressed                      | Chr2  | 16265380 | 16268835 + | 6  | 2195 | 4.25 |
| LOC_Os01g37090.1 | expressed protein                                                                   | Chr1  | 20700553 | 20703076 + | 3  | 677  | 4.25 |
| LOC_Os08g13330.1 | retrotransposon protein, putative, Ty1-copia subclass, expressed                    | Chr8  | 7920977  | 7924531 -  | 4  | 719  | 4.25 |
| LOC_Os03g31880.1 | SHORT-ROOT, putative, expressed                                                     | Chr3  | 18238256 | 18240730 - | 1  | 2507 | 4.25 |
| LOC_Os09g28100.1 | OsRhmbd15 - Putative Rhomboid homologue, expressed                                  | Chr9  | 17059795 | 17062359 + | 9  | 1866 | 4.25 |
| LOC_Os02g19410.1 | expressed protein                                                                   | Chr2  | 11335415 | 11337708 - | 3  | 1754 | 4.26 |
| LOC_Os07g33420.4 | hydroxylase, putative, expressed                                                    | Chr7  | 19975530 | 19981364 - | 6  | 2234 | 4.26 |
| LOC_Os07g33420.2 | hydroxylase, putative, expressed                                                    | Chr7  | 19975530 | 19981364 - | 7  | 2271 | 4.26 |
| LOC_Os07g33420.3 | hydroxylase, putative, expressed                                                    | Chr7  | 19975530 | 19981363 - | 6  | 2309 | 4.26 |
| LOC_Os01g37690.1 | sodium/calcium exchanger protein, putative, expressed                               | Chr1  | 21071370 | 21076730 - | 9  | 2386 | 4.26 |
| LOC_Os04g45600.1 | NDH-M H PLASTOQUINONE DEHY, putative, expressed                                     | Chr4  | 26977405 | 26978791 + | 2  | 1297 | 4.26 |
| LOC_Os06g06960.1 | S-locus-like receptor protein kinase, putative, expressed                           | Chr6  | 3305184  | 3307861 -  | 1  | 2710 | 4.26 |
| LOC_Os08g38990.3 | WRKY30, expressed                                                                   | Chr8  | 24645860 | 24649085 - | 5  | 2662 | 4.26 |
| LOC_Os05g43240.3 | jacalin-like lectin domain containing protein, expressed                            | Chr5  | 25159955 | 25163447 + | 6  | 2395 | 4.26 |
| LOC_Os04g54740.3 | expressed protein                                                                   | Chr4  | 32552399 | 32556341 + | 3  | 753  | 4.26 |
| LOC_Os07g49240.1 | MRH1, putative, expressed                                                           | Chr7  | 29484521 | 29487438 + | 6  | 2290 | 4.26 |
| LOC_Os10g22560.3 | peptide transporter PTR2, putative, expressed                                       | Chr10 | 11691142 | 11695039 - | 6  | 2435 | 4.26 |
| LOC_Os06g20440.1 | transposon protein, putative, CACTA, En/Spm sub-class, expressed                    | Chr6  | 11742656 | 11746429 - | 9  | 1554 | 4.26 |
| LOC_Os04g46460.2 | amino acid kinase, putative, expressed                                              | Chr4  | 27563230 | 27564681 + | 1  | 1484 | 4.26 |
| LOC_Os11g46960.1 | receptor-like protein kinase precursor, putative, expressed                         | Chr11 | 28224334 | 28228388 + | 2  | 1243 | 4.26 |
| LOC_Os05g25950.1 | cyclin, putative, expressed                                                         | Chr5  | 15084915 | 15086150 + | 1  | 1268 | 4.26 |
| LOC_Os09g15320.2 | ubiquitin-conjugating enzyme, putative, expressed                                   | Chr9  | 9357955  | 9362416 +  | 6  | 1159 | 4.26 |

|                  |                                                                                  |       |          |            |    |      |      |
|------------------|----------------------------------------------------------------------------------|-------|----------|------------|----|------|------|
| LOC_Os09g15320.1 | ubiquitin-conjugating enzyme, putative, expressed                                | Chr9  | 9357985  | 9362416 +  | 6  | 1126 | 4.26 |
| LOC_Os06g34650.1 | zinc finger, C3HC4 type domain containing protein, expressed                     | Chr6  | 20143793 | 20144666 + | 1  | 906  | 4.26 |
| LOC_Os07g31310.1 | PPR repeat domain containing protein, putative, expressed                        | Chr7  | 18536372 | 18541354 - | 3  | 3943 | 4.26 |
| LOC_Os01g66600.2 | rhodanese-like, putative, expressed                                              | Chr1  | 38685221 | 38688097 - | 3  | 1373 | 4.27 |
| LOC_Os10g25320.3 | initiation factor 2 subunit family domain containing protein, expressed          | Chr10 | 13091456 | 13096704 - | 9  | 1616 | 4.27 |
| LOC_Os10g25320.2 | initiation factor 2 subunit family domain containing protein, expressed          | Chr10 | 13091456 | 13096750 - | 9  | 1666 | 4.27 |
| LOC_Os03g10755.1 | expressed protein                                                                | Chr3  | 5491325  | 5494424 -  | 5  | 1124 | 4.27 |
| LOC_Os07g43020.1 | TRM112, putative, expressed                                                      | Chr7  | 25774436 | 25775340 - | 1  | 937  | 4.27 |
| LOC_Os08g09670.1 | F-box/LRR-repeat protein 22, putative, expressed                                 | Chr8  | 5584228  | 5587025 -  | 2  | 1340 | 4.27 |
| LOC_Os01g49830.1 | B3 DNA binding domain containing protein, expressed                              | Chr1  | 28619484 | 28621118 - | 1  | 1667 | 4.27 |
| LOC_Os04g49610.1 | expressed protein                                                                | Chr4  | 29583835 | 29585675 - | 5  | 1279 | 4.27 |
| LOC_Os05g32330.1 | endonuclease/exonuclease/phosphatase family domain containing protein, expressed | Chr5  | 18845942 | 18849942 - | 10 | 1888 | 4.27 |
| LOC_Os01g51210.2 | uncharacterized protein PA4923, putative, expressed                              | Chr1  | 29437276 | 29439881 - | 6  | 1456 | 4.28 |
| LOC_Os02g40490.1 | expressed protein                                                                | Chr2  | 24560176 | 24563246 + | 4  | 575  | 4.28 |
| LOC_Os08g34380.2 | receptor-like kinase, putative, expressed                                        | Chr8  | 21578024 | 21583634 - | 9  | 2565 | 4.28 |
| LOC_Os08g34380.1 | receptor-like kinase, putative, expressed                                        | Chr8  | 21578024 | 21583634 - | 11 | 3184 | 4.28 |
| LOC_Os06g23430.2 | signal recognition particle 19 kDa protein, putative, expressed                  | Chr6  | 13677506 | 13681875 - | 4  | 1044 | 4.28 |
| LOC_Os08g30830.1 | transposon protein, putative, unclassified, expressed                            | Chr8  | 19033958 | 19035156 + | 3  | 798  | 4.28 |
| LOC_Os03g45344.1 | expressed protein                                                                | Chr3  | 25601289 | 25603942 - | 3  | 1095 | 4.28 |
| LOC_Os02g27490.2 | bile acid sodium symporter family protein, putative, expressed                   | Chr2  | 16265380 | 16268088 + | 5  | 1964 | 4.28 |
| LOC_Os03g16350.1 | DNA binding protein, putative, expressed                                         | Chr3  | 9022590  | 9023976 +  | 1  | 1419 | 4.28 |
| LOC_Os11g14900.5 | thiol protease SEN102 precursor, putative, expressed                             | Chr11 | 8379342  | 8382033 -  | 5  | 1665 | 4.28 |
| LOC_Os11g14900.1 | thiol protease SEN102 precursor, putative, expressed                             | Chr11 | 8379342  | 8382015 -  | 5  | 1666 | 4.28 |
| LOC_Os11g14900.2 | thiol protease SEN102 precursor, putative, expressed                             | Chr11 | 8379342  | 8382036 -  | 5  | 1671 | 4.28 |
| LOC_Os11g14900.4 | thiol protease SEN102 precursor, putative, expressed                             | Chr11 | 8379342  | 8382036 -  | 5  | 1680 | 4.28 |
| LOC_Os04g24160.1 | expressed protein                                                                | Chr4  | 13815784 | 13817011 - | 2  | 736  | 4.28 |
| LOC_Os04g30790.1 | expressed protein                                                                | Chr4  | 18407325 | 18410401 - | 9  | 1818 | 4.28 |
| LOC_Os05g50640.1 | transposon protein, putative, unclassified, expressed                            | Chr5  | 29028867 | 29032785 + | 2  | 2919 | 4.28 |
| LOC_Os10g39810.1 | fatty acid hydroxylase, putative, expressed                                      | Chr10 | 21308453 | 21311416 + | 5  | 1478 | 4.28 |
| LOC_Os12g34510.1 | Core histone H2A/H2B/H3/H4 domain containing protein, putative, expressed        | Chr12 | 20888185 | 20889121 - | 2  | 903  | 4.28 |
| LOC_Os01g16340.1 | expressed protein                                                                | Chr1  | 9264978  | 9268482 +  | 6  | 1396 | 4.28 |
| LOC_Os04g32920.4 | potassium transporter, putative, expressed                                       | Chr4  | 19887940 | 19892492 + | 8  | 3348 | 4.28 |
| LOC_Os03g49140.1 | ABC1 protein At2g40090 precursor, putative, expressed                            | Chr3  | 27989293 | 27991227 - | 3  | 1018 | 4.28 |
| LOC_Os03g05800.3 | expressed protein                                                                | Chr3  | 2899130  | 2900290 -  | 2  | 953  | 4.28 |
| LOC_Os02g18810.2 | pentatricopeptide, putative, expressed                                           | Chr2  | 10960622 | 10968060 + | 5  | 1527 | 4.28 |
| LOC_Os03g64250.2 | expressed protein                                                                | Chr3  | 36295246 | 36297531 + | 6  | 1692 | 4.28 |
| LOC_Os01g37280.3 | expressed protein                                                                | Chr1  | 20816985 | 20820446 + | 4  | 2956 | 4.28 |
| LOC_Os02g26814.3 | UDP-N-acetylglucosamine transferase subunit ALG13, putative, expressed           | Chr2  | 15740129 | 15742974 + | 4  | 987  | 4.28 |
| LOC_Os02g26814.2 | UDP-N-acetylglucosamine transferase subunit ALG13, putative, expressed           | Chr2  | 15740126 | 15742974 + | 4  | 974  | 4.28 |
| LOC_Os04g40180.1 | expressed protein                                                                | Chr4  | 23912883 | 23915214 + | 2  | 1144 | 4.28 |
| LOC_Os01g10600.1 | aquaporin protein, putative, expressed                                           | Chr1  | 5663323  | 5668903 -  | 7  | 1334 | 4.28 |
| LOC_Os07g49280.1 | PMR5, putative, expressed                                                        | Chr7  | 29511567 | 29516375 - | 4  | 2891 | 4.28 |
| LOC_Os05g43240.1 | jacalin-like lectin domain containing protein, expressed                         | Chr5  | 25158992 | 25163447 + | 8  | 2692 | 4.29 |
| LOC_Os05g43240.2 | jacalin-like lectin domain containing protein, expressed                         | Chr5  | 25158986 | 25163447 + | 7  | 2755 | 4.29 |
| LOC_Os07g30830.1 | SNF7 family protein, putative, expressed                                         | Chr7  | 18250957 | 18253283 + | 3  | 756  | 4.29 |



|                  |                                                                                                 |       |          |            |   |      |      |
|------------------|-------------------------------------------------------------------------------------------------|-------|----------|------------|---|------|------|
| LOC_Os07g30830.2 | SNF7 family protein, putative, expressed                                                        | Chr7  | 18250922 | 18253311 + | 3 | 824  | 4.29 |
| LOC_Os01g02070.1 | invertase/pectin methylesterase inhibitor family protein, putative, expressed                   | Chr1  | 585963   | 586445 +   | 1 | 515  | 4.29 |
| LOC_Os02g01480.1 | nucleic acid binding protein, putative, expressed                                               | Chr2  | 274428   | 277257 +   | 8 | 1446 | 4.29 |
| LOC_Os03g36540.1 | magnesium-chelatase subunit chlI, chloroplast precursor, putative, expressed                    | Chr3  | 20247674 | 20250146 - | 3 | 2375 | 4.29 |
| LOC_Os03g36540.2 | magnesium-chelatase subunit chlI, chloroplast precursor, putative, expressed                    | Chr3  | 20247674 | 20250146 - | 4 | 2300 | 4.29 |
| LOC_Os01g55020.5 | expressed protein                                                                               | Chr1  | 31635593 | 31638430 + | 3 | 769  | 4.29 |
| LOC_Os01g55020.2 | expressed protein                                                                               | Chr1  | 31635593 | 31638430 + | 4 | 837  | 4.29 |
| LOC_Os04g33470.2 | Ser/Thr protein phosphatase family protein, putative, expressed                                 | Chr4  | 20245217 | 20249961 - | 5 | 1284 | 4.29 |
| LOC_Os04g41450.1 | TGF-beta receptor, type I/II extracellular region, putative, expressed                          | Chr4  | 24560986 | 24566456 - | 6 | 3024 | 4.29 |
| LOC_Os06g04580.1 | transcription factor TFIIIF, putative, expressed                                                | Chr6  | 1990029  | 1993736 +  | 7 | 1519 | 4.29 |
| LOC_Os07g48280.3 | expressed protein                                                                               | Chr7  | 28848874 | 28852330 - | 2 | 2790 | 4.29 |
| LOC_Os07g48280.1 | expressed protein                                                                               | Chr7  | 28848822 | 28852330 - | 3 | 2773 | 4.29 |
| LOC_Os05g32810.1 | expressed protein                                                                               | Chr5  | 19217189 | 19218684 - | 3 | 1423 | 4.29 |
| LOC_Os04g03990.1 | 3-5 exonuclease domain-containing protein, putative, expressed                                  | Chr4  | 1835462  | 1839603 -  | 7 | 1450 | 4.29 |
| LOC_Os11g03670.1 | Mpv17 / PMP22 family domain containing protein, expressed                                       | Chr11 | 1429206  | 1432727 -  | 8 | 1684 | 4.29 |
| LOC_Os01g70090.1 | enoyl-CoA hydratase/isomerase family protein, putative, expressed                               | Chr1  | 40563530 | 40566440 + | 2 | 1542 | 4.29 |
| LOC_Os08g18720.1 | retrotransposon protein, putative, unclassified                                                 | Chr8  | 11173403 | 11174632 + | 2 | 1021 | 4.29 |
| LOC_Os12g04790.1 | expressed protein                                                                               | Chr12 | 2042903  | 2045476 +  | 3 | 1270 | 4.29 |
| LOC_Os05g32190.1 | tungus CG8253-PA, putative, expressed                                                           | Chr5  | 18769040 | 18772114 - | 6 | 1078 | 4.29 |
| LOC_Os01g11880.1 | DJ-1 family protein, putative, expressed                                                        | Chr1  | 6432336  | 6436086 +  | 7 | 2382 | 4.29 |
| LOC_Os07g12490.1 | KH domain containing protein, putative, expressed                                               | Chr7  | 7120719  | 7126458 +  | 7 | 1704 | 4.30 |
| LOC_Os01g16180.4 | MT-A70 domain containing protein, expressed                                                     | Chr1  | 9159606  | 9165693 +  | 8 | 4318 | 4.30 |
| LOC_Os01g47110.1 | expressed protein                                                                               | Chr1  | 26916205 | 26916570 + | 1 | 398  | 4.30 |
| LOC_Os10g42180.1 | aluminum-activated malate transporter, putative, expressed                                      | Chr10 | 22682272 | 22685028 - | 6 | 2375 | 4.30 |
| LOC_Os01g16180.3 | MT-A70 domain containing protein, expressed                                                     | Chr1  | 9159606  | 9165693 +  | 8 | 4358 | 4.30 |
| LOC_Os07g03060.1 | expressed protein                                                                               | Chr7  | 1159806  | 1163372 +  | 2 | 2948 | 4.30 |
| LOC_Os03g64250.6 | expressed protein                                                                               | Chr3  | 36295246 | 36299447 + | 7 | 2347 | 4.30 |
| LOC_Os08g42470.1 | BEE 1, putative, expressed                                                                      | Chr8  | 26841064 | 26843299 - | 8 | 1622 | 4.30 |
| LOC_Os03g15380.1 | expressed protein                                                                               | Chr3  | 8413175  | 8415066 +  | 3 | 1095 | 4.30 |
| LOC_Os09g20240.1 | DUF581 domain containing protein, expressed                                                     | Chr9  | 12126822 | 12128189 + | 2 | 1350 | 4.30 |
| LOC_Os09g38310.1 | pentatricopeptide, putative, expressed                                                          | Chr9  | 22036957 | 22040688 - | 4 | 3058 | 4.31 |
| LOC_Os09g09320.2 | nuclear transport factor, putative, expressed                                                   | Chr9  | 4988972  | 4990544 +  | 2 | 892  | 4.31 |
| LOC_Os05g24150.1 | tetratricopeptide-like helical, putative, expressed                                             | Chr5  | 13929176 | 13932703 - | 5 | 2464 | 4.31 |
| LOC_Os06g08290.1 | MYB family transcription factor, putative, expressed                                            | Chr6  | 4015962  | 4019327 +  | 5 | 1911 | 4.31 |
| LOC_Os01g72670.4 | expressed protein                                                                               | Chr1  | 42163534 | 42166462 - | 7 | 1933 | 4.31 |
| LOC_Os04g30790.2 | expressed protein                                                                               | Chr4  | 18407323 | 18410401 - | 7 | 1940 | 4.31 |
| LOC_Os12g30590.1 | disease resistance protein RGA2, putative, expressed                                            | Chr12 | 18369705 | 18373748 + | 2 | 3478 | 4.31 |
| LOC_Os04g38420.1 | oxidoreductase, short chain dehydrogenase/reductase family domain containing protein, expressed | Chr4  | 22837855 | 22840529 - | 3 | 1385 | 4.31 |
| LOC_Os04g14690.1 | flavin-containing monooxygenase family protein, putative, expressed                             | Chr4  | 8243687  | 8249942 -  | 5 | 2016 | 4.31 |
| LOC_Os05g43800.1 | expressed protein                                                                               | Chr5  | 25464179 | 25466433 - | 2 | 2160 | 4.31 |
| LOC_Os03g15530.1 | expressed protein                                                                               | Chr3  | 8530910  | 8533071 -  | 1 | 2194 | 4.31 |
| LOC_Os10g11240.1 | expressed protein                                                                               | Chr10 | 6233625  | 6236688 -  | 5 | 988  | 4.31 |
| LOC_Os02g43340.1 | hydrolase, alpha/beta fold family domain containing protein, expressed                          | Chr2  | 26146594 | 26151338 - | 9 | 1921 | 4.31 |
| LOC_Os02g43340.2 | hydrolase, alpha/beta fold family domain containing protein, expressed                          | Chr2  | 26146598 | 26151390 - | 8 | 2052 | 4.31 |
| LOC_Os04g34330.1 | serine/threonine-protein kinase receptor precursor, putative, expressed                         | Chr4  | 20790085 | 20792481 + | 1 | 2429 | 4.31 |

|                  |                                                                                                |       |          |            |    |      |      |
|------------------|------------------------------------------------------------------------------------------------|-------|----------|------------|----|------|------|
| LOC_Os06g51530.1 | ribosomal protein L29, putative, expressed                                                     | Chr6  | 31223501 | 31226586 - | 8  | 1128 | 4.31 |
| LOC_Os04g32920.3 | potassium transporter, putative, expressed                                                     | Chr4  | 19886674 | 19892492 + | 9  | 3357 | 4.31 |
| LOC_Os04g32920.5 | potassium transporter, putative, expressed                                                     | Chr4  | 19886676 | 19892492 + | 9  | 3370 | 4.31 |
| LOC_Os04g32920.1 | potassium transporter, putative, expressed                                                     | Chr4  | 19886676 | 19892492 + | 9  | 3382 | 4.31 |
| LOC_Os04g32920.2 | potassium transporter, putative, expressed                                                     | Chr4  | 19886676 | 19892492 + | 9  | 3462 | 4.31 |
| LOC_Os10g41390.1 | protein kinase domain containing protein, expressed                                            | Chr10 | 22247749 | 22253378 + | 15 | 3837 | 4.31 |
| LOC_Os01g04550.1 | expressed protein                                                                              | Chr1  | 2036118  | 2038198 +  | 3  | 1833 | 4.31 |
| LOC_Os12g06910.1 | nucleolar protein family 6, putative, expressed                                                | Chr12 | 3360716  | 3369213 +  | 24 | 4179 | 4.31 |
| LOC_Os11g16540.1 | tetratricopeptide repeat domain containing protein, expressed                                  | Chr11 | 9156589  | 9173338 -  | 18 | 3690 | 4.31 |
| LOC_Os01g69830.1 | OsSPL2 - SBP-box gene family member, expressed                                                 | Chr1  | 40331733 | 40335718 + | 3  | 2079 | 4.31 |
| LOC_Os05g30250.2 | Os5bglu19 - beta-glucosidase homologue, similar to G. max isohydroxyurate hydrolase, expressed | Chr5  | 17530143 | 17534646 + | 12 | 2569 | 4.31 |
| LOC_Os03g48840.1 | ribosomal L18p/L5e family protein, putative, expressed                                         | Chr3  | 27823028 | 27825718 + | 1  | 2723 | 4.31 |
| LOC_Os02g26814.1 | UDP-N-acetylglucosamine transferase subunit ALG13, putative, expressed                         | Chr2  | 15740124 | 15742974 + | 4  | 996  | 4.31 |
| LOC_Os02g12870.6 | expressed protein                                                                              | Chr2  | 6790686  | 6795165 +  | 8  | 1719 | 4.31 |
| LOC_Os05g11090.2 | thioredoxin, putative, expressed                                                               | Chr5  | 6233819  | 6237524 -  | 3  | 1599 | 4.31 |
| LOC_Os03g62070.1 | hydrolase, putative, expressed                                                                 | Chr3  | 35164707 | 35169032 + | 5  | 1962 | 4.31 |
| LOC_Os03g64250.5 | expressed protein                                                                              | Chr3  | 36295246 | 36299447 + | 6  | 2441 | 4.31 |
| LOC_Os01g07212.1 | staphylococcal nuclease homologue, putative, expressed                                         | Chr1  | 3401288  | 3407358 +  | 11 | 2015 | 4.32 |
| LOC_Os02g56219.1 | acetyltransferase, GNAT family, putative, expressed                                            | Chr2  | 34382284 | 34388181 + | 3  | 1384 | 4.32 |
| LOC_Os02g22650.2 | glycosyltransferase, putative, expressed                                                       | Chr2  | 13495411 | 13498723 + | 3  | 2847 | 4.32 |
| LOC_Os02g22650.1 | glycosyltransferase, putative, expressed                                                       | Chr2  | 13495411 | 13498723 + | 3  | 2850 | 4.32 |
| LOC_Os12g06910.2 | nucleolar protein family 6, putative, expressed                                                | Chr12 | 3360716  | 3369240 +  | 23 | 4247 | 4.32 |
| LOC_Os02g26814.4 | UDP-N-acetylglucosamine transferase subunit ALG13, putative, expressed                         | Chr2  | 15740129 | 15742974 + | 4  | 954  | 4.32 |
| LOC_Os07g12490.2 | KH domain containing protein, putative, expressed                                              | Chr7  | 7120954  | 7126458 +  | 6  | 1597 | 4.32 |
| LOC_Os08g13060.1 | MBTB22 - Bric-a-Brac, Tramtrack, Broad Complex BTB domain with Mepirin and TRAF Homology I     | Chr8  | 7756666  | 7758169 -  | 1  | 1536 | 4.32 |
| LOC_Os12g17070.1 | radical SAM enzyme, putative, expressed                                                        | Chr12 | 9766670  | 9772331 -  | 2  | 3663 | 4.32 |
| LOC_Os09g29780.2 | expressed protein                                                                              | Chr9  | 18098663 | 18100425 - | 2  | 946  | 4.32 |
| LOC_Os11g37560.1 | expressed protein                                                                              | Chr11 | 22175492 | 22178883 - | 4  | 2204 | 4.32 |
| LOC_Os11g37560.2 | expressed protein                                                                              | Chr11 | 22175492 | 22178883 - | 4  | 2198 | 4.32 |
| LOC_Os04g23040.1 | expressed protein                                                                              | Chr4  | 13086288 | 13089005 - | 5  | 1320 | 4.32 |
| LOC_Os01g58400.1 | zinc finger C3HC4 type family protein, putative, expressed                                     | Chr1  | 33740650 | 33745858 - | 10 | 2352 | 4.33 |
| LOC_Os01g58400.2 | zinc finger C3HC4 type family protein, putative, expressed                                     | Chr1  | 33740650 | 33745858 - | 10 | 2319 | 4.33 |
| LOC_Os02g57620.1 | Citrate transporter protein, putative, expressed                                               | Chr2  | 35286785 | 35290716 + | 3  | 2711 | 4.33 |
| LOC_Os01g05440.1 | XH domain containing protein, expressed                                                        | Chr1  | 2570072  | 2571997 -  | 4  | 1364 | 4.33 |
| LOC_Os09g33470.1 | mitochondrial carrier protein, putative, expressed                                             | Chr9  | 19728409 | 19735541 - | 12 | 1798 | 4.33 |
| LOC_Os03g07226.1 | thioredoxin, putative, expressed                                                               | Chr3  | 3694441  | 3698200 -  | 5  | 1330 | 4.33 |
| LOC_Os04g36800.1 | 3-oxoacyl-synthase, putative, expressed                                                        | Chr4  | 22216909 | 22221345 - | 7  | 2159 | 4.33 |
| LOC_Os05g48950.1 | expressed protein                                                                              | Chr5  | 28077381 | 28078527 + | 2  | 1119 | 4.33 |
| LOC_Os09g04995.1 | expressed protein                                                                              | Chr9  | 2688913  | 2691284 -  | 2  | 1936 | 4.33 |
| LOC_Os07g40770.1 | myosin heavy chain-related, putative, expressed                                                | Chr7  | 24429187 | 24433536 - | 7  | 1841 | 4.33 |
| LOC_Os06g44150.1 | CorA-like magnesium transporter protein, putative, expressed                                   | Chr6  | 26635632 | 26639757 - | 5  | 1859 | 4.33 |
| LOC_Os08g05190.1 | retrotransposon protein, putative, Ty3-gypsy subclass                                          | Chr8  | 2706529  | 2707326 -  | 1  | 830  | 4.34 |
| LOC_Os11g24590.1 | transposon protein, putative, Pong sub-class, expressed                                        | Chr11 | 14038902 | 14042499 + | 3  | 2210 | 4.34 |
| LOC_Os08g05340.1 | expressed protein                                                                              | Chr8  | 2808273  | 2813026 +  | 10 | 3218 | 4.34 |
| LOC_Os07g31690.1 | retrotransposon protein, putative, unclassified, expressed                                     | Chr7  | 18814660 | 18818135 + | 3  | 2582 | 4.34 |

|                  |                                                                       |       |          |            |    |      |      |
|------------------|-----------------------------------------------------------------------|-------|----------|------------|----|------|------|
| LOC_Os05g08854.1 | expressed protein                                                     | Chr5  | 4886631  | 4890243 -  | 5  | 1912 | 4.34 |
| LOC_Os09g20579.2 | expressed protein                                                     | Chr9  | 12397884 | 12399092 + | 1  | 1241 | 4.34 |
| LOC_Os07g12710.1 | GIY-YIG catalytic domain containing protein, putative, expressed      | Chr7  | 7258614  | 7260429 -  | 4  | 1574 | 4.34 |
| LOC_Os06g01470.1 | AGAP000326-PA, putative, expressed                                    | Chr6  | 282348   | 284950 +   | 2  | 1911 | 4.34 |
| LOC_Os05g35260.1 | PB1 domain containing protein, expressed                              | Chr5  | 20939551 | 20942220 + | 4  | 2012 | 4.34 |
| LOC_Os05g35260.2 | PB1 domain containing protein, expressed                              | Chr5  | 20939551 | 20942220 + | 3  | 2063 | 4.34 |
| LOC_Os04g44550.2 | CHCH domain containing protein, expressed                             | Chr4  | 26372025 | 26375186 + | 3  | 865  | 4.34 |
| LOC_Os02g53780.2 | expressed protein                                                     | Chr2  | 32945680 | 32951005 + | 13 | 3040 | 4.34 |
| LOC_Os08g31030.1 | HOTHEAD precursor, putative, expressed                                | Chr8  | 19157179 | 19161852 - | 6  | 2364 | 4.34 |
| LOC_Os04g21500.1 | retrotransposon protein, putative, Ty3-gypsy subclass, expressed      | Chr4  | 12155013 | 12160308 + | 2  | 4915 | 4.34 |
| LOC_Os09g01620.2 | RNA pseudouridine synthase, putative, expressed                       | Chr9  | 437172   | 443033 +   | 10 | 2003 | 4.34 |
| LOC_Os09g01620.1 | RNA pseudouridine synthase, putative, expressed                       | Chr9  | 437172   | 443033 +   | 10 | 2022 | 4.34 |
| LOC_Os02g31924.1 | expressed protein                                                     | Chr2  | 18861405 | 18862005 + | 1  | 633  | 4.34 |
| LOC_Os01g61560.3 | phosphatidate cytidyltransferase, putative, expressed                 | Chr1  | 35601031 | 35604029 - | 6  | 1429 | 4.34 |
| LOC_Os12g26875.1 | expressed protein                                                     | Chr12 | 15753988 | 15754746 - | 1  | 791  | 4.34 |
| LOC_Os05g01630.1 | OsFBX156 - F-box domain containing protein, expressed                 | Chr5  | 372787   | 375683 -   | 5  | 2320 | 4.34 |
| LOC_Os05g06680.1 | expressed protein                                                     | Chr5  | 3463349  | 3468755 -  | 4  | 2267 | 4.34 |
| LOC_Os05g06680.2 | expressed protein                                                     | Chr5  | 3463349  | 3468755 -  | 4  | 2273 | 4.34 |
| LOC_Os01g37280.2 | expressed protein                                                     | Chr1  | 20816985 | 20820446 + | 3  | 3347 | 4.34 |
| LOC_Os01g37280.1 | expressed protein                                                     | Chr1  | 20816955 | 20820446 + | 3  | 3384 | 4.34 |
| LOC_Os12g08240.1 | expressed protein                                                     | Chr12 | 4203828  | 4206452 -  | 4  | 920  | 4.34 |
| LOC_Os01g03810.1 | expressed protein                                                     | Chr1  | 1597486  | 1598510 -  | 1  | 1057 | 4.34 |
| LOC_Os01g63220.1 | kinase, pfkB family, putative, expressed                              | Chr1  | 36640943 | 36643202 + | 2  | 1936 | 4.34 |
| LOC_Os01g09750.2 | RNA methyltransferase protein, putative, expressed                    | Chr1  | 5022051  | 5025704 -  | 9  | 2107 | 4.35 |
| LOC_Os04g54330.2 | acetyltransferase, GNAT family, putative, expressed                   | Chr4  | 32340668 | 32342426 - | 1  | 1791 | 4.35 |
| LOC_Os03g10450.2 | Sua5/YciO/YrdC/YwIC family protein, putative, expressed               | Chr3  | 5320785  | 5323970 -  | 5  | 1909 | 4.35 |
| LOC_Os01g59890.1 | pentatricopeptide, putative, expressed                                | Chr1  | 34636151 | 34639624 + | 3  | 2572 | 4.35 |
| LOC_Os10g07150.1 | transposon protein, putative, unclassified, expressed                 | Chr10 | 3750178  | 3752622 -  | 2  | 2077 | 4.35 |
| LOC_Os01g16180.2 | MT-A70 domain containing protein, expressed                           | Chr1  | 9159765  | 9165687 +  | 7  | 4463 | 4.35 |
| LOC_Os02g17460.1 | tesmin/TSO1-like CXC domain containing protein, expressed             | Chr2  | 10042478 | 10049191 - | 9  | 2117 | 4.35 |
| LOC_Os01g22510.1 | cyclase/dehydrase family protein, expressed                           | Chr1  | 12650540 | 12654393 + | 7  | 1357 | 4.35 |
| LOC_Os08g18079.1 | expressed protein                                                     | Chr8  | 11074054 | 11078779 + | 5  | 2713 | 4.35 |
| LOC_Os09g33950.1 | ferredoxin 1-like isoform 1, putative, expressed                      | Chr9  | 20039465 | 20040401 - | 1  | 969  | 4.35 |
| LOC_Os05g38360.1 | DHHC zinc finger domain containing protein, expressed                 | Chr5  | 22488569 | 22492094 + | 8  | 1695 | 4.35 |
| LOC_Os03g56830.2 | ad-003, putative, expressed                                           | Chr3  | 32381178 | 32383791 - | 8  | 1492 | 4.35 |
| LOC_Os03g37950.1 | proteasome subunit, putative, expressed                               | Chr3  | 21078343 | 21080791 + | 2  | 1707 | 4.36 |
| LOC_Os12g40910.1 | expressed protein                                                     | Chr12 | 25328178 | 25328713 - | 2  | 457  | 4.36 |
| LOC_Os04g36050.1 | cleft lip and palate transmembrane protein 1, putative, expressed     | Chr4  | 21989516 | 21995087 - | 12 | 2738 | 4.36 |
| LOC_Os01g34100.1 | expressed protein                                                     | Chr1  | 18780600 | 18781392 + | 1  | 825  | 4.36 |
| LOC_Os02g47170.1 | expressed protein                                                     | Chr2  | 28795583 | 28800686 - | 4  | 3719 | 4.36 |
| LOC_Os03g39432.2 | CPuORF31 - conserved peptide uORF-containing transcript, expressed    | Chr3  | 21912140 | 21913786 + | 2  | 1591 | 4.36 |
| LOC_Os02g04460.1 | ribosomal protein L3, putative, expressed                             | Chr2  | 1972935  | 1974663 -  | 2  | 1060 | 4.36 |
| LOC_Os06g10730.1 | expressed protein                                                     | Chr6  | 5601748  | 5604984 +  | 2  | 1518 | 4.36 |
| LOC_Os03g24040.1 | seven in absentia protein family domain containing protein, expressed | Chr3  | 13633729 | 13637491 - | 4  | 1621 | 4.36 |
| LOC_Os05g46710.1 | expressed protein                                                     | Chr5  | 27036918 | 27039084 - | 4  | 1236 | 4.36 |

|                  |                                                                                             |       |          |            |    |      |      |
|------------------|---------------------------------------------------------------------------------------------|-------|----------|------------|----|------|------|
| LOC_Os08g03670.2 | galactosyltransferase family protein, putative, expressed                                   | Chr8  | 1744665  | 1748184 +  | 6  | 2041 | 4.36 |
| LOC_Os04g49110.1 | GRAS family transcription factor domain containing protein, expressed                       | Chr4  | 29275026 | 29277269 - | 1  | 2276 | 4.36 |
| LOC_Os05g38360.2 | DHHC zinc finger domain containing protein, expressed                                       | Chr5  | 22488533 | 22492117 + | 7  | 1822 | 4.36 |
| LOC_Os05g31480.1 | methyltransferase, putative, expressed                                                      | Chr5  | 18313409 | 18318440 - | 8  | 2618 | 4.37 |
| LOC_Os01g71599.1 | expressed protein                                                                           | Chr1  | 41480531 | 41482391 - | 4  | 554  | 4.37 |
| LOC_Os08g28080.1 | coatamer subunit delta, putative, expressed                                                 | Chr8  | 17122122 | 17132608 - | 16 | 3026 | 4.37 |
| LOC_Os11g38030.1 | CDK5RAP1, putative, expressed                                                               | Chr11 | 22561543 | 22565402 - | 3  | 2412 | 4.37 |
| LOC_Os09g32800.1 | peptidase, T1 family, putative, expressed                                                   | Chr9  | 19562275 | 19565838 + | 7  | 1387 | 4.37 |
| LOC_Os02g47320.1 | vacuolar ATPase G subunit, putative, expressed                                              | Chr2  | 28898090 | 28900862 - | 5  | 1219 | 4.37 |
| LOC_Os08g28830.1 | pentatricopeptide, putative, expressed                                                      | Chr8  | 17628667 | 17631205 + | 1  | 2571 | 4.37 |
| LOC_Os11g41910.1 | GTP-binding protein, putative, expressed                                                    | Chr11 | 25212874 | 25216758 + | 8  | 1626 | 4.37 |
| LOC_Os11g29690.1 | oxidoreductase, 2OG-Fe oxygenase family protein, putative, expressed                        | Chr11 | 17208164 | 17210164 + | 5  | 1034 | 4.37 |
| LOC_Os09g38755.1 | E3 ubiquitin-protein ligase HERC2, putative, expressed                                      | Chr9  | 22269102 | 22272680 + | 6  | 2115 | 4.37 |
| LOC_Os01g58630.1 | pentatricopeptide repeat, putative, expressed                                               | Chr1  | 33893707 | 33895999 + | 2  | 2241 | 4.37 |
| LOC_Os03g52430.1 | mitochondrial carrier protein, putative, expressed                                          | Chr3  | 30085441 | 30090107 - | 11 | 1793 | 4.37 |
| LOC_Os03g61040.1 | GIL1, putative, expressed                                                                   | Chr3  | 34674983 | 34676923 - | 1  | 1973 | 4.37 |
| LOC_Os07g34980.1 | TKL_IRAK_DUF26-lh.9 - DUF26 kinases have homology to DUF26 containing loci, expressed       | Chr7  | 20958620 | 20962387 + | 7  | 2201 | 4.37 |
| LOC_Os07g09950.1 | OsFBX222 - F-box domain containing protein, expressed                                       | Chr7  | 5303491  | 5304753 -  | 1  | 1295 | 4.37 |
| LOC_Os05g25400.1 | RNA binding protein, putative, expressed                                                    | Chr5  | 14770503 | 14773117 + | 7  | 1544 | 4.37 |
| LOC_Os03g55950.2 | H-BTB1 - Bric-a-Brac, Tramtrack, Broad Complex BTB domain with H family conserved sequence, | Chr3  | 31853872 | 31857850 + | 4  | 2714 | 4.37 |
| LOC_Os09g17850.1 | acetyltransferase type B catalytic subunit, putative, expressed                             | Chr9  | 10922338 | 10926994 + | 10 | 2152 | 4.37 |
| LOC_Os01g53450.2 | aminotransferase, classes I and II, domain containing protein, expressed                    | Chr1  | 30712157 | 30717688 + | 12 | 3853 | 4.37 |
| LOC_Os12g37440.1 | conserved hypothetical protein                                                              | Chr12 | 22980342 | 22982338 - | 2  | 1252 | 4.37 |
| LOC_Os01g16180.1 | MT-A70 domain containing protein, expressed                                                 | Chr1  | 9159606  | 9165693 +  | 6  | 5243 | 4.37 |
| LOC_Os05g31480.2 | methyltransferase, putative, expressed                                                      | Chr5  | 18313409 | 18318440 - | 7  | 2673 | 4.37 |
| LOC_Os01g72520.1 | phosphoesterase family protein, putative, expressed                                         | Chr1  | 42063181 | 42067788 - | 4  | 2083 | 4.37 |
| LOC_Os01g68010.4 | TBC domain containing protein, expressed                                                    | Chr1  | 39539150 | 39541096 - | 5  | 1015 | 4.37 |
| LOC_Os02g40860.1 | CK1_CaseinKinase_1.5 - CK1 includes the casein kinase 1 kinases, expressed                  | Chr2  | 24766807 | 24772750 + | 14 | 2852 | 4.37 |
| LOC_Os01g10630.1 | expressed protein                                                                           | Chr1  | 5675585  | 5679551 -  | 6  | 1833 | 4.38 |
| LOC_Os01g10630.2 | expressed protein                                                                           | Chr1  | 5675585  | 5679551 -  | 6  | 2153 | 4.38 |
| LOC_Os03g06340.1 | XS domain containing protein, expressed                                                     | Chr3  | 3170103  | 3176437 +  | 3  | 1812 | 4.38 |
| LOC_Os06g49080.1 | zinc finger C-x8-C-x5-C-x3-H type family protein, expressed                                 | Chr6  | 29738880 | 29742503 + | 11 | 2186 | 4.38 |
| LOC_Os03g44230.1 | transmembrane amino acid transporter protein, putative, expressed                           | Chr3  | 24850172 | 24854377 - | 8  | 2542 | 4.38 |
| LOC_Os09g23360.2 | expressed protein                                                                           | Chr9  | 13880626 | 13883902 - | 4  | 2514 | 4.38 |
| LOC_Os09g23360.1 | expressed protein                                                                           | Chr9  | 13880626 | 13883902 - | 5  | 2335 | 4.38 |
| LOC_Os05g38360.3 | DHHC zinc finger domain containing protein, expressed                                       | Chr5  | 22488569 | 22492195 + | 8  | 1801 | 4.38 |
| LOC_Os09g19890.1 | expressed protein                                                                           | Chr9  | 11904357 | 11908232 + | 3  | 2748 | 4.38 |
| LOC_Os05g35060.1 | DUF803 domain containing, putative, expressed                                               | Chr5  | 20807057 | 20811318 - | 9  | 2425 | 4.39 |
| LOC_Os09g09370.1 | BTBN18 - Bric-a-Brac, Tramtrack, Broad Complex BTB domain with non-phototropic hypocotyl 3  | Chr9  | 5021748  | 5029479 -  | 7  | 2688 | 4.39 |
| LOC_Os01g70980.1 | expressed protein                                                                           | Chr1  | 41085901 | 41088168 - | 3  | 1137 | 4.39 |
| LOC_Os06g50370.1 | zinc finger, C3HC4 type, domain containing protein, expressed                               | Chr6  | 30492760 | 30496151 + | 5  | 1691 | 4.39 |
| LOC_Os07g49010.1 | TOPBP1B - Similar to DNA replication protein TOPBP1 from, expressed                         | Chr7  | 29342988 | 29350836 - | 10 | 4915 | 4.39 |
| LOC_Os01g26039.1 | expressed protein                                                                           | Chr1  | 14754773 | 14764507 - | 13 | 2960 | 4.39 |
| LOC_Os05g32270.1 | AP2 domain containing protein, expressed                                                    | Chr5  | 18812390 | 18817699 + | 9  | 1772 | 4.39 |
| LOC_Os07g19470.3 | uncharacterized ACR, YggU family COG1872 containing protein, expressed                      | Chr7  | 11513903 | 11516720 - | 6  | 1591 | 4.39 |

|                  |                                                                                                  |       |          |            |    |      |      |
|------------------|--------------------------------------------------------------------------------------------------|-------|----------|------------|----|------|------|
| LOC_Os09g05030.2 | armadillo/beta-catenin-like repeat family protein, expressed                                     | Chr9  | 2703211  | 2707348 -  | 2  | 2317 | 4.39 |
| LOC_Os12g03290.1 | AP2 domain containing protein, expressed                                                         | Chr12 | 1269561  | 1274766 -  | 6  | 1767 | 4.39 |
| LOC_Os07g48840.1 | Ser/Thr protein phosphatase family protein, putative, expressed                                  | Chr7  | 29225276 | 29228504 + | 3  | 2087 | 4.39 |
| LOC_Os07g48840.3 | Ser/Thr protein phosphatase family protein, putative, expressed                                  | Chr7  | 29225276 | 29228504 + | 3  | 2201 | 4.39 |
| LOC_Os01g74330.1 | pectinacylesterase domain containing protein, expressed                                          | Chr1  | 43066680 | 43070166 - | 10 | 1840 | 4.39 |
| LOC_Os03g37950.3 | proteasome subunit, putative, expressed                                                          | Chr3  | 21078321 | 21080790 + | 2  | 2011 | 4.39 |
| LOC_Os03g37950.2 | proteasome subunit, putative, expressed                                                          | Chr3  | 21078321 | 21080791 + | 2  | 1880 | 4.39 |
| LOC_Os02g48480.1 | expressed protein                                                                                | Chr2  | 29677821 | 29678633 + | 1  | 845  | 4.39 |
| LOC_Os02g24636.1 | expressed protein                                                                                | Chr2  | 14287886 | 14288188 - | 1  | 335  | 4.39 |
| LOC_Os10g41692.1 | expressed protein                                                                                | Chr10 | 22447469 | 22447771 - | 1  | 335  | 4.39 |
| LOC_Os07g46730.1 | PPR repeat domain containing protein, putative, expressed                                        | Chr7  | 27929310 | 27932769 - | 2  | 3033 | 4.39 |
| LOC_Os08g36570.1 | F-box protein, putative, expressed                                                               | Chr8  | 23077540 | 23079365 - | 3  | 1711 | 4.40 |
| LOC_Os01g55974.3 | deoxycytidylate deaminase, putative, expressed                                                   | Chr1  | 32233137 | 32235404 - | 3  | 1988 | 4.40 |
| LOC_Os11g40030.1 | cyclin-dependent kinase inhibitor, putative, expressed                                           | Chr11 | 23866045 | 23867666 + | 3  | 1338 | 4.40 |
| LOC_Os01g36940.1 | OsFBX13 - F-box domain containing protein, expressed                                             | Chr1  | 20595192 | 20598852 + | 3  | 1401 | 4.40 |
| LOC_Os01g24180.1 | retrotransposon protein, putative, unclassified                                                  | Chr1  | 13626406 | 13630428 + | 3  | 2079 | 4.40 |
| LOC_Os08g03290.2 | glyceraldehyde-3-phosphate dehydrogenase, putative, expressed                                    | Chr8  | 1525436  | 1529228 +  | 11 | 2012 | 4.40 |
| LOC_Os02g06030.1 | phytosulfokine receptor precursor, putative, expressed                                           | Chr2  | 3005602  | 3007978 -  | 1  | 2409 | 4.40 |
| LOC_Os08g03290.1 | glyceraldehyde-3-phosphate dehydrogenase, putative, expressed                                    | Chr8  | 1525295  | 1529228 +  | 12 | 2052 | 4.40 |
| LOC_Os08g03290.3 | glyceraldehyde-3-phosphate dehydrogenase, putative, expressed                                    | Chr8  | 1525330  | 1529228 +  | 11 | 2272 | 4.40 |
| LOC_Os05g05550.1 | expressed protein                                                                                | Chr5  | 2755047  | 2761436 -  | 3  | 692  | 4.40 |
| LOC_Os01g64820.1 | POLA1 - Putative DNA polymerase alpha catalytic subunit, expressed                               | Chr1  | 37625795 | 37636034 - | 31 | 5958 | 4.40 |
| LOC_Os05g30860.1 | expressed protein                                                                                | Chr5  | 17914212 | 17917811 - | 3  | 2567 | 4.40 |
| LOC_Os02g49150.5 | RNA polymerase Rpb4, putative, expressed                                                         | Chr2  | 30054264 | 30058543 - | 6  | 1075 | 4.40 |
| LOC_Os05g19470.1 | expressed protein                                                                                | Chr5  | 11314372 | 11319936 + | 6  | 1177 | 4.40 |
| LOC_Os03g63990.1 | transposon protein, putative, unclassified, expressed                                            | Chr3  | 36165994 | 36171502 + | 9  | 4467 | 4.40 |
| LOC_Os01g03660.2 | MYB family transcription factor, putative, expressed                                             | Chr1  | 1508235  | 1512752 +  | 10 | 2103 | 4.40 |
| LOC_Os04g40140.2 | expressed protein                                                                                | Chr4  | 23885498 | 23889561 - | 6  | 1738 | 4.40 |
| LOC_Os04g40140.1 | expressed protein                                                                                | Chr4  | 23885498 | 23887923 - | 5  | 1753 | 4.40 |
| LOC_Os01g63220.3 | kinase, pfkB family, putative, expressed                                                         | Chr1  | 36640943 | 36646487 + | 3  | 2221 | 4.40 |
| LOC_Os11g02310.1 | pentatricopeptide, putative, expressed                                                           | Chr11 | 671757   | 675572 +   | 4  | 3659 | 4.40 |
| LOC_Os01g65260.1 | amidophosphoribosyltransferase, chloroplast precursor, putative, expressed                       | Chr1  | 37866113 | 37868060 - | 1  | 1980 | 4.40 |
| LOC_Os07g12910.2 | PHD finger protein, putative, expressed                                                          | Chr7  | 7415667  | 7418059 -  | 4  | 811  | 4.40 |
| LOC_Os07g12910.4 | PHD finger protein, putative, expressed                                                          | Chr7  | 7415665  | 7418059 -  | 4  | 818  | 4.40 |
| LOC_Os01g70850.1 | esterase, putative, expressed                                                                    | Chr1  | 41004288 | 41006137 - | 3  | 1235 | 4.40 |
| LOC_Os05g04850.2 | RNA recognition motif containing protein, putative, expressed                                    | Chr5  | 2331059  | 2333054 +  | 2  | 871  | 4.40 |
| LOC_Os01g62230.1 | Core histone H2A/H2B/H3/H4 domain containing protein, putative, expressed                        | Chr1  | 36013832 | 36014697 - | 1  | 898  | 4.40 |
| LOC_Os12g03710.1 | RNA recognition motif containing protein, putative, expressed                                    | Chr12 | 1497364  | 1499413 +  | 2  | 1407 | 4.41 |
| LOC_Os09g33670.1 | zinc finger, C3HC4 type domain containing protein, expressed                                     | Chr9  | 19878388 | 19882206 + | 6  | 1944 | 4.41 |
| LOC_Os01g60050.1 | HEAT, putative, expressed                                                                        | Chr1  | 34731210 | 34735202 - | 9  | 1458 | 4.41 |
| LOC_Os03g56840.1 | GTP-binding protein, putative, expressed                                                         | Chr3  | 32384812 | 32388231 - | 11 | 2100 | 4.41 |
| LOC_Os05g15890.1 | SNF2 family N-terminal domain containing protein, expressed                                      | Chr5  | 8966122  | 8973309 -  | 8  | 3400 | 4.41 |
| LOC_Os05g15890.3 | SNF2 family N-terminal domain containing protein, expressed                                      | Chr5  | 8966122  | 8973309 -  | 8  | 3400 | 4.41 |
| LOC_Os05g15890.2 | SNF2 family N-terminal domain containing protein, expressed                                      | Chr5  | 8966122  | 8973309 -  | 8  | 3405 | 4.41 |
| LOC_Os03g55950.3 | H-BTB1 - Bric-a-Brac, Tramtrack, Broad Complex BTB domain with H family conserved sequence, Chr3 | Chr3  | 31853917 | 31857850 + | 4  | 2565 | 4.41 |

|                  |                                                                                             |       |          |            |    |      |      |
|------------------|---------------------------------------------------------------------------------------------|-------|----------|------------|----|------|------|
| LOC_Os02g57280.1 | CBS domain containing membrane protein, putative, expressed                                 | Chr2  | 35092340 | 35094315 + | 5  | 1689 | 4.41 |
| LOC_Os02g57280.4 | CBS domain containing membrane protein, putative, expressed                                 | Chr2  | 35092340 | 35094315 + | 5  | 1731 | 4.41 |
| LOC_Os02g57280.6 | CBS domain containing membrane protein, putative, expressed                                 | Chr2  | 35092340 | 35094315 + | 4  | 1747 | 4.41 |
| LOC_Os02g57280.5 | CBS domain containing membrane protein, putative, expressed                                 | Chr2  | 35092340 | 35094315 + | 4  | 1789 | 4.41 |
| LOC_Os02g57280.7 | CBS domain containing membrane protein, putative, expressed                                 | Chr2  | 35092340 | 35094315 + | 3  | 1847 | 4.41 |
| LOC_Os02g58460.1 | beta-catenin-like protein 1, putative, expressed                                            | Chr2  | 35747230 | 35751292 - | 8  | 2167 | 4.41 |
| LOC_Os07g43740.1 | zinc finger, C3HC4 type domain containing protein, expressed                                | Chr7  | 26173595 | 26174386 + | 1  | 824  | 4.41 |
| LOC_Os03g56840.2 | GTP-binding protein, putative, expressed                                                    | Chr3  | 32384812 | 32388231 - | 10 | 2148 | 4.41 |
| LOC_Os12g35340.1 | OsGrx_C11 - glutaredoxin subgroup III, expressed                                            | Chr12 | 21480112 | 21481075 + | 1  | 996  | 4.41 |
| LOC_Os05g45730.1 | ubiquinone oxidoreductase, putative, expressed                                              | Chr5  | 26494486 | 26497211 + | 2  | 1214 | 4.42 |
| LOC_Os11g08940.1 | RNA polymerases N 8 kDa subunit, putative, expressed                                        | Chr11 | 4732019  | 4734044 +  | 4  | 377  | 4.42 |
| LOC_Os01g06920.1 | resistance protein SIVe1 precursor, putative, expressed                                     | Chr1  | 3282976  | 3286357 +  | 1  | 3414 | 4.42 |
| LOC_Os05g32330.2 | endonuclease/exonuclease/phosphatase family domain containing protein, expressed            | Chr5  | 18845942 | 18849942 - | 9  | 2348 | 4.42 |
| LOC_Os07g27950.1 | RING zinc finger protein, putative, expressed                                               | Chr7  | 16302993 | 16307559 + | 5  | 1853 | 4.42 |
| LOC_Os07g27950.2 | RING zinc finger protein, putative, expressed                                               | Chr7  | 16302993 | 16307559 + | 5  | 1850 | 4.42 |
| LOC_Os01g56360.1 | wax synthase, putative, expressed                                                           | Chr1  | 32475143 | 32479148 - | 7  | 2218 | 4.42 |
| LOC_Os01g55500.4 | nucleobase-ascorbate transporter, putative, expressed                                       | Chr1  | 31975992 | 31979416 + | 12 | 2309 | 4.42 |
| LOC_Os01g58280.1 | OsSub8 - Putative Subtilisin homologue, expressed                                           | Chr1  | 33684778 | 33688225 + | 10 | 2636 | 4.42 |
| LOC_Os08g41890.2 | microtubule associated protein, putative, expressed                                         | Chr8  | 26448418 | 26452961 + | 10 | 2595 | 4.42 |
| LOC_Os08g41890.1 | microtubule associated protein, putative, expressed                                         | Chr8  | 26448418 | 26452961 + | 11 | 2544 | 4.42 |
| LOC_Os09g12300.1 | serine/threonine-protein kinase NAK, putative, expressed                                    | Chr9  | 7015998  | 7016707 -  | 2  | 589  | 4.42 |
| LOC_Os01g65986.1 | DUF803 domain containing, putative, expressed                                               | Chr1  | 38299999 | 38305642 + | 9  | 2109 | 4.42 |
| LOC_Os01g58620.1 | expressed protein                                                                           | Chr1  | 33890098 | 33891727 - | 1  | 1662 | 4.43 |
| LOC_Os08g05360.1 | transposon protein, putative, unclassified, expressed                                       | Chr8  | 2822433  | 2830063 +  | 12 | 5685 | 4.43 |
| LOC_Os12g31240.1 | retrotransposon protein, putative, Ty3-gypsy subclass                                       | Chr12 | 18810731 | 18812591 + | 2  | 945  | 4.43 |
| LOC_Os07g34520.3 | isocitrate lyase, putative, expressed                                                       | Chr7  | 20691054 | 20693694 - | 2  | 2624 | 4.43 |
| LOC_Os07g34520.1 | isocitrate lyase, putative, expressed                                                       | Chr7  | 20691054 | 20693694 - | 3  | 2519 | 4.43 |
| LOC_Os07g34520.2 | isocitrate lyase, putative, expressed                                                       | Chr7  | 20691054 | 20693521 - | 2  | 2395 | 4.43 |
| LOC_Os07g05790.1 | retrotransposon protein, putative, unclassified, expressed                                  | Chr7  | 2786582  | 2788423 +  | 1  | 1874 | 4.43 |
| LOC_Os04g56290.2 | aldose 1-epimerase, putative, expressed                                                     | Chr4  | 33557307 | 33563979 + | 9  | 2930 | 4.43 |
| LOC_Os05g43760.1 | TCP family transcription factor, putative, expressed                                        | Chr5  | 25436354 | 25438703 + | 2  | 1713 | 4.43 |
| LOC_Os04g44550.1 | CHCH domain containing protein, expressed                                                   | Chr4  | 26372046 | 26375186 + | 4  | 1002 | 4.43 |
| LOC_Os06g09780.1 | retrotransposon protein, putative, unclassified                                             | Chr6  | 4979155  | 4980996 -  | 2  | 1675 | 4.43 |
| LOC_Os04g07760.1 | retrotransposon protein, putative, unclassified, expressed                                  | Chr4  | 4124355  | 4133318 +  | 9  | 3321 | 4.43 |
| LOC_Os02g54940.1 | expressed protein                                                                           | Chr2  | 33650679 | 33651357 + | 2  | 487  | 4.43 |
| LOC_Os02g18784.1 | expressed protein                                                                           | Chr2  | 10947696 | 10948612 - | 1  | 949  | 4.43 |
| LOC_Os03g18990.1 | expressed protein                                                                           | Chr3  | 10643568 | 10645277 + | 5  | 1042 | 4.43 |
| LOC_Os02g19629.1 | expressed protein                                                                           | Chr2  | 11473863 | 11474785 - | 2  | 884  | 4.43 |
| LOC_Os04g49060.1 | H-BTB3 - Bric-a-Brac, Tramtrack, Broad Complex BTB domain with H family conserved sequence, | Chr4  | 29247374 | 29249631 + | 2  | 2238 | 4.43 |
| LOC_Os03g29170.2 | sterol-4-alpha-carboxylate 3-dehydrogenase, decarboxylating, putative, expressed            | Chr3  | 16571965 | 16577763 + | 10 | 2572 | 4.43 |
| LOC_Os03g29170.1 | sterol-4-alpha-carboxylate 3-dehydrogenase, decarboxylating, putative, expressed            | Chr3  | 16571944 | 16577834 + | 12 | 2526 | 4.43 |
| LOC_Os10g35980.1 | tetraspanin family protein, putative, expressed                                             | Chr10 | 19230258 | 19233195 - | 11 | 1528 | 4.43 |
| LOC_Os08g23470.1 | B3 DNA binding domain containing protein, expressed                                         | Chr8  | 14209891 | 14213318 - | 3  | 2274 | 4.43 |
| LOC_Os06g21340.2 | rho GDP-dissociation inhibitor 1, putative, expressed                                       | Chr6  | 12322948 | 12326083 - | 4  | 1451 | 4.43 |
| LOC_Os08g27010.1 | APE1, putative, expressed                                                                   | Chr8  | 16506115 | 16510326 + | 9  | 1628 | 4.43 |

|                  |                                                                          |       |          |          |   |    |      |      |
|------------------|--------------------------------------------------------------------------|-------|----------|----------|---|----|------|------|
| LOC_Os01g03050.1 | fruit protein PKIWI502, putative, expressed                              | Chr1  | 1165737  | 1168415  | + | 5  | 1654 | 4.43 |
| LOC_Os08g38220.1 | dof zinc finger domain containing protein, putative, expressed           | Chr8  | 24232676 | 24233972 | + | 1  | 1329 | 4.43 |
| LOC_Os06g13580.1 | expressed protein                                                        | Chr6  | 7498331  | 7500517  | - | 8  | 1270 | 4.44 |
| LOC_Os02g32615.1 | expressed protein                                                        | Chr2  | 19332473 | 19333623 | - | 1  | 1183 | 4.44 |
| LOC_Os03g37240.1 | retrotransposon protein, putative, unclassified, expressed               | Chr3  | 20638709 | 20641638 | + | 8  | 2498 | 4.44 |
| LOC_Os06g41060.1 | helix-loop-helix DNA-binding, putative, expressed                        | Chr6  | 24522165 | 24527832 | - | 6  | 1271 | 4.44 |
| LOC_Os05g27350.1 | expressed protein                                                        | Chr5  | 15894885 | 15896386 | - | 1  | 1534 | 4.44 |
| LOC_Os06g12050.1 | mTERF family protein, expressed                                          | Chr6  | 6458283  | 6459567  | - | 2  | 1311 | 4.44 |
| LOC_Os04g03740.1 | expressed protein                                                        | Chr4  | 1652403  | 1653677  | + | 2  | 1268 | 4.44 |
| LOC_Os07g13534.1 | expressed protein                                                        | Chr7  | 7749266  | 7751782  | - | 2  | 761  | 4.44 |
| LOC_Os05g23700.1 | DNA-binding storekeeper protein-related, putative, expressed             | Chr5  | 13606399 | 13607791 | + | 1  | 1425 | 4.44 |
| LOC_Os06g45130.1 | expressed protein                                                        | Chr6  | 27294148 | 27295054 | + | 2  | 268  | 4.44 |
| LOC_Os04g41990.1 | autophagy-related protein 10, putative, expressed                        | Chr4  | 24876009 | 24877897 | - | 5  | 1242 | 4.44 |
| LOC_Os02g22060.1 | expressed protein                                                        | Chr2  | 13119915 | 13127569 | - | 8  | 2194 | 4.45 |
| LOC_Os11g05110.2 | pyruvate kinase, putative, expressed                                     | Chr11 | 2239210  | 2243604  | - | 17 | 2776 | 4.45 |
| LOC_Os11g05110.1 | pyruvate kinase, putative, expressed                                     | Chr11 | 2239210  | 2243499  | - | 16 | 2717 | 4.45 |
| LOC_Os11g05110.3 | pyruvate kinase, putative, expressed                                     | Chr11 | 2239210  | 2243499  | - | 16 | 2712 | 4.45 |
| LOC_Os01g19850.1 | amino acid permease family protein, putative, expressed                  | Chr1  | 11254144 | 11261684 | - | 12 | 2775 | 4.45 |
| LOC_Os02g52620.1 | expressed protein                                                        | Chr2  | 32189251 | 32190146 | + | 1  | 928  | 4.45 |
| LOC_Os04g28470.1 | retrotransposon protein, putative, unclassified, expressed               | Chr4  | 16860380 | 16862551 | + | 2  | 2126 | 4.45 |
| LOC_Os07g44770.1 | expressed protein                                                        | Chr7  | 26719123 | 26722212 | - | 13 | 2414 | 4.45 |
| LOC_Os12g03594.1 | OsFBX437 - F-box domain containing protein, expressed                    | Chr12 | 1436996  | 1445090  | + | 4  | 2959 | 4.45 |
| LOC_Os02g45270.1 | expressed protein                                                        | Chr2  | 27502723 | 27503874 | - | 1  | 1184 | 4.45 |
| LOC_Os04g57330.1 | expressed protein                                                        | Chr4  | 34127975 | 34131164 | - | 5  | 1488 | 4.45 |
| LOC_Os02g47060.1 | WRKY66, expressed                                                        | Chr2  | 28726783 | 28730933 | + | 3  | 1728 | 4.45 |
| LOC_Os06g20354.1 | PPR repeat domain containing protein, putative, expressed                | Chr6  | 11693031 | 11695278 | + | 3  | 1588 | 4.45 |
| LOC_Os10g35230.1 | Rf1, mitochondrial precursor, putative, expressed                        | Chr10 | 18823675 | 18825328 | - | 1  | 1686 | 4.45 |
| LOC_Os01g03040.1 | expressed protein                                                        | Chr1  | 1160152  | 1164635  | - | 4  | 1177 | 4.45 |
| LOC_Os01g47200.1 | retrotransposon protein, putative, unclassified, expressed               | Chr1  | 26975615 | 26978104 | + | 3  | 1745 | 4.45 |
| LOC_Os01g08690.1 | holocarboxylase synthetase, putative, expressed                          | Chr1  | 4326578  | 4328863  | + | 3  | 1431 | 4.45 |
| LOC_Os02g37020.1 | expressed protein                                                        | Chr2  | 22355174 | 22362057 | + | 5  | 2494 | 4.45 |
| LOC_Os11g14180.1 | expressed protein                                                        | Chr11 | 7931610  | 7935798  | + | 4  | 2839 | 4.45 |
| LOC_Os01g36840.3 | ATP-binding region, ATPase-like domain containing protein, expressed     | Chr1  | 20495221 | 20501766 | - | 12 | 2519 | 4.45 |
| LOC_Os12g41770.1 | expressed protein                                                        | Chr12 | 25877950 | 25878380 | - | 1  | 463  | 4.45 |
| LOC_Os05g19040.1 | prefoldin, putative, expressed                                           | Chr5  | 11049078 | 11052426 | - | 2  | 1318 | 4.45 |
| LOC_Os01g65090.1 | aminotransferase, classes I and II, domain containing protein, expressed | Chr1  | 37779509 | 37782884 | + | 10 | 2016 | 4.45 |
| LOC_Os01g65090.2 | aminotransferase, classes I and II, domain containing protein, expressed | Chr1  | 37779618 | 37782884 | + | 10 | 1868 | 4.45 |
| LOC_Os05g51800.1 | peptidyl-tRNA hydrolase, mitochondrial precursor, putative, expressed    | Chr5  | 29742839 | 29745605 | + | 8  | 721  | 4.45 |
| LOC_Os06g36400.1 | HAD superfamily phosphatase, putative, expressed                         | Chr6  | 21374013 | 21377313 | - | 3  | 1305 | 4.45 |
| LOC_Os04g57650.1 | expressed protein                                                        | Chr4  | 34321350 | 34324747 | - | 6  | 1196 | 4.45 |
| LOC_Os10g42110.1 | protein kinase family protein, putative, expressed                       | Chr10 | 22650009 | 22654267 | + | 10 | 2593 | 4.45 |
| LOC_Os06g09170.2 | zinc ion binding protein, putative, expressed                            | Chr6  | 4612249  | 4615532  | + | 5  | 1756 | 4.45 |
| LOC_Os11g05160.1 | DNA binding protein, putative, expressed                                 | Chr11 | 2271006  | 2274083  | + | 5  | 1800 | 4.45 |
| LOC_Os03g38010.1 | nuf2 family protein, expressed                                           | Chr3  | 21102128 | 21106012 | - | 11 | 2165 | 4.46 |
| LOC_Os04g40140.3 | expressed protein                                                        | Chr4  | 23885590 | 23889226 | - | 6  | 2148 | 4.46 |

|                  |                                                                           |       |          |            |    |      |      |
|------------------|---------------------------------------------------------------------------|-------|----------|------------|----|------|------|
| LOC_Os09g14614.2 | serine/arginine repetitive matrix protein 1, putative, expressed          | Chr9  | 8665792  | 8667873 -  | 2  | 1578 | 4.46 |
| LOC_Os12g02050.1 | expressed protein                                                         | Chr12 | 610165   | 612434 +   | 4  | 1136 | 4.46 |
| LOC_Os02g33020.1 | SOUL heme-binding protein, putative, expressed                            | Chr2  | 19632434 | 19635251 + | 7  | 1272 | 4.46 |
| LOC_Os11g34130.1 | expressed protein                                                         | Chr11 | 19985660 | 19989101 + | 11 | 2575 | 4.46 |
| LOC_Os10g24020.2 | transposon protein, putative, unclassified, expressed                     | Chr10 | 12307922 | 12311609 - | 6  | 3171 | 4.46 |
| LOC_Os10g24020.1 | transposon protein, putative, unclassified, expressed                     | Chr10 | 12307922 | 12311609 - | 5  | 3449 | 4.46 |
| LOC_Os05g08210.1 | retrotransposon, putative, centromere-specific                            | Chr5  | 4472601  | 4473927 -  | 3  | 690  | 4.46 |
| LOC_Os05g30410.1 | PHF5-like protein domain containing protein, expressed                    | Chr5  | 17627044 | 17627376 - | 1  | 365  | 4.46 |
| LOC_Os06g21340.1 | rho GDP-dissociation inhibitor 1, putative, expressed                     | Chr6  | 12322863 | 12326083 - | 5  | 1461 | 4.46 |
| LOC_Os04g51380.1 | protein-S-isoprenylcysteine O-methyltransferase. tax, putative, expressed | Chr4  | 30428188 | 30431745 + | 5  | 1450 | 4.46 |
| LOC_Os09g39570.1 | beta-amylase, putative, expressed                                         | Chr9  | 22713280 | 22717110 + | 9  | 3006 | 4.46 |
| LOC_Os04g44590.5 | expressed protein                                                         | Chr4  | 26387566 | 26391274 + | 3  | 825  | 4.46 |
| LOC_Os03g10890.1 | zinc finger, C3HC4 type domain containing protein, expressed              | Chr3  | 5593820  | 5596016 +  | 2  | 1369 | 4.46 |
| LOC_Os02g22084.2 | expressed protein                                                         | Chr2  | 13137869 | 13141343 + | 4  | 2036 | 4.46 |
| LOC_Os01g09550.4 | no apical meristem protein, putative, expressed                           | Chr1  | 4879207  | 4885949 -  | 4  | 5843 | 4.46 |
| LOC_Os03g19000.1 | peroxisomal biogenesis factor 11, putative, expressed                     | Chr3  | 10645800 | 10646902 + | 1  | 1135 | 4.46 |
| LOC_Os01g52780.1 | HVA22, putative, expressed                                                | Chr1  | 30363062 | 30370212 - | 9  | 4737 | 4.47 |
| LOC_Os01g59980.1 | zinc finger family protein, putative, expressed                           | Chr1  | 34677991 | 34682230 + | 4  | 3374 | 4.47 |
| LOC_Os07g49390.1 | P-protein, putative, expressed                                            | Chr7  | 29579789 | 29583150 - | 12 | 1939 | 4.47 |
| LOC_Os02g14860.1 | prefoldin subunit, putative, expressed                                    | Chr2  | 8262546  | 8265723 +  | 5  | 1020 | 4.47 |
| LOC_Os12g07830.1 | OsAPx5 - Stromal Ascorbate Peroxidase encoding gene 5,8, expressed        | Chr12 | 3960512  | 3964001 -  | 11 | 1678 | 4.47 |
| LOC_Os07g46240.1 | choline transporter-related, putative, expressed                          | Chr7  | 27590441 | 27594192 - | 5  | 2511 | 4.47 |
| LOC_Os01g18100.1 | OsRhmbd3 - Putative Rhomboid homologue, expressed                         | Chr1  | 10137215 | 10140159 - | 2  | 2020 | 4.47 |
| LOC_Os03g21290.1 | retrotransposon protein, putative, Ty3-gypsy subclass, expressed          | Chr3  | 12176602 | 12182782 - | 6  | 3759 | 4.47 |
| LOC_Os03g11990.2 | bolA, putative, expressed                                                 | Chr3  | 6282854  | 6284348 +  | 3  | 693  | 4.47 |
| LOC_Os06g44280.1 | retrotransposon protein, putative, Ty3-gypsy subclass, expressed          | Chr6  | 26714866 | 26717570 + | 3  | 2342 | 4.47 |
| LOC_Os07g08770.1 | YGGT family protein, putative, expressed                                  | Chr7  | 4509152  | 4513785 -  | 2  | 1158 | 4.47 |
| LOC_Os02g42540.1 | expressed protein                                                         | Chr2  | 25576772 | 25579174 + | 6  | 1150 | 4.47 |
| LOC_Os05g04160.1 | pentatricopeptide containing protein, putative, expressed                 | Chr5  | 1864582  | 1866495 +  | 1  | 1946 | 4.47 |
| LOC_Os01g57840.1 | expressed protein                                                         | Chr1  | 33448306 | 33449348 + | 2  | 983  | 4.47 |
| LOC_Os07g05440.1 | retrotransposon protein, putative, unclassified, expressed                | Chr7  | 2502663  | 2507764 +  | 1  | 5134 | 4.47 |
| LOC_Os01g61890.4 | AT hook motif family protein, expressed                                   | Chr1  | 35816630 | 35820868 - | 3  | 2295 | 4.47 |
| LOC_Os03g38330.1 | disease resistance RPP13-like protein 1, putative, expressed              | Chr3  | 21268409 | 21272412 + | 3  | 3602 | 4.48 |
| LOC_Os02g40420.1 | expressed protein                                                         | Chr2  | 24482990 | 24487434 - | 7  | 2336 | 4.48 |
| LOC_Os02g17280.1 | gamma-secretase subunit APH-1B, putative, expressed                       | Chr2  | 9902629  | 9907888 +  | 6  | 1319 | 4.48 |
| LOC_Os02g52650.1 | chlorophyll A-B binding protein, putative, expressed                      | Chr2  | 32199522 | 32201722 - | 6  | 1351 | 4.48 |
| LOC_Os10g25220.1 | SAP domain containing protein, expressed                                  | Chr10 | 13018505 | 13023203 - | 10 | 2826 | 4.48 |
| LOC_Os01g71690.3 | recA protein, expressed                                                   | Chr1  | 41539690 | 41545870 - | 9  | 2874 | 4.48 |
| LOC_Os01g71690.2 | recA protein, expressed                                                   | Chr1  | 41539700 | 41545870 - | 10 | 3102 | 4.48 |
| LOC_Os02g52130.4 | OsFBX61 - F-box domain containing protein, expressed                      | Chr2  | 31908532 | 31911652 + | 4  | 1795 | 4.48 |
| LOC_Os02g52130.5 | OsFBX61 - F-box domain containing protein, expressed                      | Chr2  | 31908532 | 31911652 + | 4  | 1800 | 4.48 |
| LOC_Os08g09740.1 | OsFBX274 - F-box domain containing protein, expressed                     | Chr8  | 5628896  | 5632266 +  | 5  | 2402 | 4.48 |
| LOC_Os02g54280.1 | retrotransposon protein, putative, unclassified, expressed                | Chr2  | 33279514 | 33295107 - | 23 | 6627 | 4.48 |
| LOC_Os01g08540.1 | DNA mismatch repair protein MSH6-2, putative, expressed                   | Chr1  | 4234514  | 4244531 -  | 17 | 4603 | 4.48 |
| LOC_Os09g27140.2 | expressed protein                                                         | Chr9  | 16503937 | 16508819 - | 5  | 1511 | 4.48 |



|                  |                                                                                     |       |          |            |    |      |      |
|------------------|-------------------------------------------------------------------------------------|-------|----------|------------|----|------|------|
| LOC_Os08g09910.1 | OsFBX276 - F-box domain containing protein, expressed                               | Chr8  | 5720452  | 5723821 +  | 5  | 1996 | 4.48 |
| LOC_Os08g03590.1 | expressed protein                                                                   | Chr8  | 1677840  | 1680335 +  | 5  | 1010 | 4.48 |
| LOC_Os01g65350.2 | deoxynucleoside kinase family, putative, expressed                                  | Chr1  | 37914761 | 37918998 - | 4  | 3325 | 4.48 |
| LOC_Os09g05020.1 | tyrosine phosphatase family protein, putative, expressed                            | Chr9  | 2697267  | 2702668 +  | 5  | 1589 | 4.48 |
| LOC_Os03g21390.1 | expressed protein                                                                   | Chr3  | 12232168 | 12232877 + | 2  | 400  | 4.48 |
| LOC_Os11g36410.1 | NBS-LRR type disease resistance protein, putative, expressed                        | Chr11 | 21468751 | 21472160 - | 2  | 3198 | 4.48 |
| LOC_Os05g50290.1 | hhH-GPD superfamily base excision DNA repair protein, putative, expressed           | Chr5  | 28826577 | 28828063 + | 1  | 1519 | 4.48 |
| LOC_Os07g43510.1 | 40S ribosomal protein S9, putative, expressed                                       | Chr7  | 26036088 | 26039317 - | 3  | 1089 | 4.48 |
| LOC_Os05g48860.1 | interferon-induced guanylate-binding protein 2, putative, expressed                 | Chr5  | 28009513 | 28010606 - | 3  | 956  | 4.48 |
| LOC_Os02g57990.3 | methionine adenosyltransferase regulatory beta subunit-related, putative, expressed | Chr2  | 35507155 | 35510879 + | 5  | 1242 | 4.48 |
| LOC_Os01g72710.1 | expressed protein                                                                   | Chr1  | 42190284 | 42194070 + | 8  | 2115 | 4.48 |
| LOC_Os04g15820.1 | expressed protein                                                                   | Chr4  | 8588650  | 8594339 +  | 12 | 3583 | 4.48 |
| LOC_Os09g27830.3 | OsPDIL2-3 protein disulfide isomerase PDIL2-3, expressed                            | Chr9  | 16930987 | 16935178 + | 7  | 1679 | 4.48 |
| LOC_Os02g19040.1 | GDLS-like lipase/acylhydrolase, putative, expressed                                 | Chr2  | 11116177 | 11120334 + | 5  | 1730 | 4.48 |
| LOC_Os05g33590.1 | cytochrome P450, putative, expressed                                                | Chr5  | 19742291 | 19744851 - | 4  | 1944 | 4.48 |
| LOC_Os07g45370.1 | expressed protein                                                                   | Chr7  | 27058608 | 27062284 - | 2  | 3061 | 4.48 |
| LOC_Os05g18850.1 | endoribonuclease Dicer, putative, expressed                                         | Chr5  | 10945615 | 10947989 + | 3  | 1064 | 4.48 |
| LOC_Os02g53720.2 | phytosulfokine receptor precursor, putative, expressed                              | Chr2  | 32887125 | 32889742 + | 4  | 1736 | 4.48 |
| LOC_Os02g53720.1 | phytosulfokine receptor precursor, putative, expressed                              | Chr2  | 32886843 | 32889742 + | 6  | 1900 | 4.48 |
| LOC_Os01g70850.2 | esterase, putative, expressed                                                       | Chr1  | 41004305 | 41006137 - | 2  | 1407 | 4.48 |
| LOC_Os10g22370.1 | retrotransposon protein, putative, unclassified, expressed                          | Chr10 | 11571002 | 11576569 - | 5  | 2902 | 4.48 |
| LOC_Os11g45750.2 | WRKY125, expressed                                                                  | Chr11 | 27683640 | 27690288 - | 5  | 4419 | 4.48 |
| LOC_Os02g43594.1 | MSP domain containing protein, putative, expressed                                  | Chr2  | 26311268 | 26316050 - | 7  | 1288 | 4.49 |
| LOC_Os02g43594.3 | MSP domain containing protein, putative, expressed                                  | Chr2  | 26309385 | 26316050 - | 8  | 1226 | 4.49 |
| LOC_Os02g19170.3 | expressed protein                                                                   | Chr2  | 11180103 | 11183158 + | 2  | 2588 | 4.49 |
| LOC_Os08g41910.1 | Sua5/YciO/YrdC/YwC family protein, putative, expressed                              | Chr8  | 26464491 | 26467802 + | 9  | 1463 | 4.49 |
| LOC_Os06g40560.1 | 26S protease regulatory subunit S10B, putative, expressed                           | Chr6  | 24182506 | 24186597 + | 10 | 2051 | 4.49 |
| LOC_Os09g36760.1 | DUF630/DUF632 domains containing protein, putative, expressed                       | Chr9  | 21208855 | 21213168 + | 4  | 2469 | 4.50 |
| LOC_Os01g44090.1 | X8 domain containing protein, expressed                                             | Chr1  | 25271543 | 25273512 + | 4  | 1567 | 4.50 |
| LOC_Os06g34570.1 | retrotransposon protein, putative, unclassified, expressed                          | Chr6  | 20106008 | 20112107 + | 6  | 2169 | 4.50 |
| LOC_Os10g28340.3 | heat stress transcription factor, putative, expressed                               | Chr10 | 14746101 | 14750175 - | 5  | 2255 | 4.50 |
| LOC_Os10g28340.5 | heat stress transcription factor, putative, expressed                               | Chr10 | 14746101 | 14750175 - | 4  | 2130 | 4.50 |
| LOC_Os11g05180.1 | expressed protein                                                                   | Chr11 | 2278719  | 2279569 +  | 2  | 737  | 4.50 |
| LOC_Os08g35948.2 | expressed protein                                                                   | Chr8  | 22670558 | 22675587 - | 4  | 1604 | 4.50 |
| LOC_Os05g11730.1 | CGMC_GSK.7 - CGMC includes CDA, MAPK, GSK3, and CLKC kinases, expressed             | Chr5  | 6657481  | 6661493 -  | 12 | 2247 | 4.50 |
| LOC_Os04g52361.1 | ribosomal protein S17, putative, expressed                                          | Chr4  | 31105992 | 31107930 + | 6  | 987  | 4.50 |
| LOC_Os01g21240.1 | MLA6 protein, putative, expressed                                                   | Chr1  | 11855552 | 11858974 + | 3  | 2718 | 4.50 |
| LOC_Os02g21520.1 | chalcone isomerase 3, putative, expressed                                           | Chr2  | 12765282 | 12772122 + | 5  | 1379 | 4.50 |
| LOC_Os06g05630.1 | GDLS-like lipase/acylhydrolase, putative, expressed                                 | Chr6  | 2546752  | 2549257 +  | 5  | 1864 | 4.50 |
| LOC_Os06g05630.2 | GDLS-like lipase/acylhydrolase, putative, expressed                                 | Chr6  | 2546752  | 2549257 +  | 4  | 1932 | 4.50 |
| LOC_Os03g61120.1 | anthranilate synthase component I-1, chloroplast precursor, putative, expressed     | Chr3  | 34715396 | 34721075 - | 11 | 2663 | 4.50 |
| LOC_Os03g08140.2 | tubulin--tyrosine ligase-like protein 12, putative, expressed                       | Chr3  | 4150736  | 4157416 +  | 14 | 3415 | 4.50 |
| LOC_Os03g08140.1 | tubulin--tyrosine ligase-like protein 12, putative, expressed                       | Chr3  | 4150750  | 4157419 +  | 15 | 3371 | 4.50 |
| LOC_Os06g15410.1 | angel, putative, expressed                                                          | Chr6  | 8754366  | 8757478 -  | 8  | 1159 | 4.50 |
| LOC_Os02g02480.2 | basic helix-loop-helix DND-binding domain containing protein, expressed             | Chr2  | 876783   | 878615 -   | 4  | 959  | 4.50 |

|                  |                                                                                     |       |          |          |   |    |      |      |
|------------------|-------------------------------------------------------------------------------------|-------|----------|----------|---|----|------|------|
| LOC_Os01g06640.3 | basic helix-loop-helix, putative, expressed                                         | Chr1  | 3128992  | 3130722  | + | 2  | 1674 | 4.50 |
| LOC_Os05g38490.1 | growth regulator related protein, putative, expressed                               | Chr5  | 22580337 | 22586442 | + | 11 | 2044 | 4.50 |
| LOC_Os01g50980.1 | cullin, putative, expressed                                                         | Chr1  | 29290326 | 29295442 | + | 15 | 2523 | 4.50 |
| LOC_Os06g49940.1 | retrotransposon protein, putative, unclassified, expressed                          | Chr6  | 30234847 | 30236214 | - | 1  | 1400 | 4.51 |
| LOC_Os02g57990.2 | methionine adenosyltransferase regulatory beta subunit-related, putative, expressed | Chr2  | 35507155 | 35510879 | + | 6  | 1345 | 4.51 |
| LOC_Os07g47470.1 | pentatricopeptide, putative, expressed                                              | Chr7  | 28373368 | 28375023 | - | 1  | 1688 | 4.51 |
| LOC_Os01g15530.1 | tetratricopeptide-like helical, putative, expressed                                 | Chr1  | 8732427  | 8734486  | + | 1  | 2092 | 4.51 |
| LOC_Os02g19850.1 | hAT dimerisation domain-containing protein, putative, expressed                     | Chr2  | 11663436 | 11668036 | - | 4  | 2820 | 4.51 |
| LOC_Os07g39920.1 | formin, putative, expressed                                                         | Chr7  | 23944536 | 23950464 | + | 4  | 2951 | 4.51 |
| LOC_Os06g48930.1 | expressed protein                                                                   | Chr6  | 29620476 | 29622473 | - | 2  | 1574 | 4.51 |
| LOC_Os01g59880.1 | inositol-1, 4, 5-trisphosphate 5-phosphatase, putative, expressed                   | Chr1  | 34629359 | 34635205 | - | 9  | 3663 | 4.51 |
| LOC_Os12g41860.1 | START domain containing protein, expressed                                          | Chr12 | 25920639 | 25927353 | - | 18 | 3730 | 4.51 |
| LOC_Os03g56960.1 | PPR repeat domain containing protein, putative, expressed                           | Chr3  | 32440882 | 32443979 | - | 3  | 2926 | 4.51 |
| LOC_Os03g57420.1 | ML domain protein, putative, expressed                                              | Chr3  | 32739717 | 32742759 | + | 4  | 1346 | 4.51 |
| LOC_Os10g22170.2 | expressed protein                                                                   | Chr10 | 11460289 | 11464253 | + | 8  | 1952 | 4.51 |
| LOC_Os10g22170.1 | expressed protein                                                                   | Chr10 | 11460316 | 11464253 | + | 8  | 1921 | 4.51 |
| LOC_Os01g61890.1 | AT hook motif family protein, expressed                                             | Chr1  | 35817467 | 35820860 | - | 2  | 1513 | 4.51 |
| LOC_Os03g55970.1 | uncharacterized protein ycf44, putative, expressed                                  | Chr3  | 31860449 | 31863401 | - | 8  | 2510 | 4.51 |
| LOC_Os04g40340.1 | expressed protein                                                                   | Chr4  | 23984033 | 23987369 | - | 8  | 989  | 4.51 |
| LOC_Os01g61900.1 | CCT motif family protein, expressed                                                 | Chr1  | 35827134 | 35828772 | - | 3  | 1547 | 4.51 |
| LOC_Os02g43594.2 | MSP domain containing protein, putative, expressed                                  | Chr2  | 26311268 | 26316083 | - | 7  | 1381 | 4.51 |
| LOC_Os07g40470.1 | expressed protein                                                                   | Chr7  | 24250056 | 24251465 | + | 1  | 1442 | 4.51 |
| LOC_Os08g02840.1 | ribosome, putative, expressed                                                       | Chr8  | 1192971  | 1194666  | + | 2  | 877  | 4.51 |
| LOC_Os01g58780.1 | zinc finger, C3HC4 type domain containing protein, expressed                        | Chr1  | 33968738 | 33970811 | + | 2  | 1576 | 4.52 |
| LOC_Os10g01840.1 | hypothetical protein                                                                | Chr10 | 540892   | 542632   | + | 3  | 627  | 4.52 |
| LOC_Os08g41730.1 | peptidase, T1 family, putative, expressed                                           | Chr8  | 26342315 | 26344539 | + | 6  | 1294 | 4.52 |
| LOC_Os03g48610.1 | galactosyltransferase family protein, putative, expressed                           | Chr3  | 27715478 | 27720176 | - | 7  | 2081 | 4.52 |
| LOC_Os07g12560.2 | OsFBX224 - F-box domain containing protein, expressed                               | Chr7  | 7165536  | 7167725  | - | 2  | 2043 | 4.52 |
| LOC_Os12g29280.1 | disease resistance protein RGA3, putative, expressed                                | Chr12 | 17354834 | 17357230 | + | 1  | 2429 | 4.52 |
| LOC_Os11g38930.1 | tRNA-splicing endonuclease subunit Sen2, putative, expressed                        | Chr11 | 23176604 | 23178856 | + | 2  | 1199 | 4.52 |
| LOC_Os04g49310.1 | tRNA-splicing endonuclease positive effector-related, putative, expressed           | Chr4  | 29431008 | 29434383 | - | 6  | 2569 | 4.52 |
| LOC_Os01g56850.1 | expressed protein                                                                   | Chr1  | 32835841 | 32838252 | + | 2  | 2346 | 4.52 |
| LOC_Os06g47770.1 | expressed protein                                                                   | Chr6  | 28910275 | 28914944 | - | 12 | 2866 | 4.52 |
| LOC_Os01g51030.1 | expressed protein                                                                   | Chr1  | 29317540 | 29318159 | + | 1  | 652  | 4.52 |
| LOC_Os12g04860.2 | DTW domain containing protein, putative, expressed                                  | Chr12 | 2087518  | 2090631  | - | 2  | 1950 | 4.52 |
| LOC_Os12g42640.1 | retrotransposon protein, putative, Ty3-gypsy subclass, expressed                    | Chr12 | 26500867 | 26504567 | - | 6  | 1839 | 4.53 |
| LOC_Os02g12510.1 | expressed protein                                                                   | Chr2  | 6541264  | 6543574  | + | 4  | 1271 | 4.53 |
| LOC_Os01g70310.1 | inducer of CBF expression 2, putative, expressed                                    | Chr1  | 40714145 | 40717179 | - | 5  | 1721 | 4.53 |
| LOC_Os01g70310.2 | inducer of CBF expression 2, putative, expressed                                    | Chr1  | 40714145 | 40717179 | - | 4  | 1721 | 4.53 |
| LOC_Os04g32470.1 | expressed protein                                                                   | Chr4  | 19479792 | 19484470 | - | 2  | 1117 | 4.53 |
| LOC_Os07g10860.1 | expressed protein                                                                   | Chr7  | 5931013  | 5939269  | + | 10 | 1439 | 4.53 |
| LOC_Os11g39540.1 | 14-3-3 protein, putative, expressed                                                 | Chr11 | 23553560 | 23558464 | - | 7  | 917  | 4.53 |
| LOC_Os09g29780.1 | expressed protein                                                                   | Chr9  | 18096794 | 18100425 | - | 3  | 835  | 4.53 |
| LOC_Os03g17520.1 | CDP-alcohol phosphatidyltransferase, putative, expressed                            | Chr3  | 9733146  | 9737565  | - | 7  | 1837 | 4.53 |
| LOC_Os01g40120.1 | expressed protein                                                                   | Chr1  | 22632889 | 22637560 | - | 7  | 1565 | 4.53 |

|                  |                                                                                                |       |          |            |    |      |      |
|------------------|------------------------------------------------------------------------------------------------|-------|----------|------------|----|------|------|
| LOC_Os11g26890.1 | expressed protein                                                                              | Chr11 | 15447175 | 15450155 - | 3  | 1576 | 4.53 |
| LOC_Os05g43450.1 | transcription initiation factor IIF beta subunit, putative, expressed                          | Chr5  | 25260665 | 25263726 - | 6  | 1505 | 4.53 |
| LOC_Os03g20850.1 | exostosin family domain containing protein, expressed                                          | Chr3  | 11805189 | 11807807 + | 2  | 2000 | 4.53 |
| LOC_Os03g02544.1 | expressed protein                                                                              | Chr3  | 939338   | 939908 +   | 1  | 603  | 4.53 |
| LOC_Os05g48320.2 | 60S ribosomal protein L37a, putative, expressed                                                | Chr5  | 27699747 | 27701354 + | 3  | 778  | 4.53 |
| LOC_Os03g06730.1 | plant protein of unknown function domain containing protein, expressed                         | Chr3  | 3424904  | 3426962 +  | 2  | 2047 | 4.53 |
| LOC_Os03g40170.1 | zinc finger, C3HC4 type domain containing protein, expressed                                   | Chr3  | 22332262 | 22335094 + | 5  | 1642 | 4.53 |
| LOC_Os09g01680.1 | DNA repair protein RAD51 homolog 4, putative, expressed                                        | Chr9  | 485012   | 490816 -   | 9  | 1509 | 4.53 |
| LOC_Os08g29370.1 | peptidyl-prolyl cis-trans isomerase, chloroplast precursor, putative, expressed                | Chr8  | 18020117 | 18023998 + | 7  | 1840 | 4.53 |
| LOC_Os08g29370.2 | peptidyl-prolyl cis-trans isomerase, chloroplast precursor, putative, expressed                | Chr8  | 18020081 | 18023998 + | 7  | 1873 | 4.53 |
| LOC_Os10g06760.1 | receptor-like protein kinase precursor, putative, expressed                                    | Chr10 | 3514904  | 3518648 +  | 2  | 3722 | 4.53 |
| LOC_Os12g38850.1 | DUF1336 domain containing protein, expressed                                                   | Chr12 | 23879858 | 23884982 + | 10 | 3066 | 4.53 |
| LOC_Os12g38850.3 | DUF1336 domain containing protein, expressed                                                   | Chr12 | 23879858 | 23884977 + | 11 | 2698 | 4.53 |
| LOC_Os12g38850.2 | DUF1336 domain containing protein, expressed                                                   | Chr12 | 23879858 | 23884977 + | 11 | 2588 | 4.53 |
| LOC_Os03g46260.1 | DUF581 domain containing protein, expressed                                                    | Chr3  | 26152125 | 26155504 - | 3  | 1849 | 4.53 |
| LOC_Os01g03660.3 | MYB family transcription factor, putative, expressed                                           | Chr1  | 1508235  | 1510980 +  | 8  | 1826 | 4.53 |
| LOC_Os01g66360.1 | 2-C-methyl-D-erythritol 4-phosphate cytidylyltransferase, putative, expressed                  | Chr1  | 38541818 | 38546204 + | 12 | 2026 | 4.53 |
| LOC_Os03g08400.1 | retrotransposon protein, putative, unclassified, expressed                                     | Chr3  | 4293140  | 4297457 -  | 11 | 2647 | 4.53 |
| LOC_Os12g05410.1 | G10 protein, putative, expressed                                                               | Chr12 | 2449160  | 2451525 +  | 4  | 907  | 4.53 |
| LOC_Os12g05410.2 | G10 protein, putative, expressed                                                               | Chr12 | 2449160  | 2451525 +  | 4  | 903  | 4.53 |
| LOC_Os06g39680.1 | transposon protein, putative, unclassified, expressed                                          | Chr6  | 23556493 | 23559285 + | 2  | 2755 | 4.53 |
| LOC_Os04g51380.2 | protein-S-isoprenylcysteine O-methyltransferase. tax, putative, expressed                      | Chr4  | 30428216 | 30431745 + | 6  | 1539 | 4.54 |
| LOC_Os12g04860.1 | DTW domain containing protein, putative, expressed                                             | Chr12 | 2087516  | 2090631 -  | 1  | 3148 | 4.54 |
| LOC_Os09g14614.3 | serine/arginine repetitive matrix protein 1, putative, expressed                               | Chr9  | 8665792  | 8667873 -  | 2  | 1767 | 4.54 |
| LOC_Os07g10030.1 | expressed protein                                                                              | Chr7  | 5348906  | 5353630 -  | 11 | 2090 | 4.54 |
| LOC_Os02g44730.1 | tetracycline transporter protein, putative, expressed                                          | Chr2  | 27103466 | 27106378 + | 10 | 2178 | 4.54 |
| LOC_Os05g43582.1 | tRNA methyltran, putative, expressed                                                           | Chr5  | 25346734 | 25349386 + | 6  | 1713 | 4.54 |
| LOC_Os03g55120.1 | plastocyanin-like domain containing protein, putative, expressed                               | Chr3  | 31359355 | 31360474 - | 2  | 1049 | 4.54 |
| LOC_Os07g12560.1 | OsFBX224 - F-box domain containing protein, expressed                                          | Chr7  | 7165536  | 7167725 -  | 1  | 2222 | 4.54 |
| LOC_Os08g39600.1 | RNA methyltransferase, TrmH family protein, putative, expressed                                | Chr8  | 25064640 | 25066853 - | 6  | 1035 | 4.54 |
| LOC_Os11g04600.1 | BTBA5 - Bric-a-Brac, Tramtrack, Broad Complex BTB domain with Ankyrin repeat region, expressed | Chr11 | 1951555  | 1954600 +  | 2  | 2142 | 4.55 |
| LOC_Os04g38026.1 | transporter family protein, putative, expressed                                                | Chr4  | 22627207 | 22633284 - | 3  | 2886 | 4.55 |
| LOC_Os06g04810.1 | leucine rich repeat protein, putative, expressed                                               | Chr6  | 2095566  | 2098813 -  | 1  | 3280 | 4.55 |
| LOC_Os11g44310.1 | calmodulin binding protein, putative, expressed                                                | Chr11 | 26777812 | 26783973 + | 9  | 2600 | 4.55 |
| LOC_Os02g01710.4 | peptidase family C78 domain containing protein, expressed                                      | Chr2  | 391819   | 394223 +   | 6  | 1846 | 4.55 |
| LOC_Os12g35630.3 | elongation factor TS family protein, expressed                                                 | Chr12 | 21660651 | 21664125 + | 2  | 2817 | 4.55 |
| LOC_Os12g11930.1 | disease resistance protein SlVe2 precursor, putative, expressed                                | Chr12 | 6506509  | 6509781 +  | 1  | 3305 | 4.55 |
| LOC_Os12g34400.1 | expressed protein                                                                              | Chr12 | 20850016 | 20851258 + | 4  | 1004 | 4.55 |
| LOC_Os07g38460.1 | expressed protein                                                                              | Chr7  | 23106246 | 23108163 + | 2  | 1885 | 4.55 |
| LOC_Os07g13810.1 | cytokinin-N-glucosyltransferase 1, putative, expressed                                         | Chr7  | 7911925  | 7913775 +  | 2  | 1822 | 4.55 |
| LOC_Os11g07020.6 | fructose-bisphosphate aldolase isozyme, putative, expressed                                    | Chr11 | 3488553  | 3491659 -  | 4  | 1214 | 4.55 |
| LOC_Os03g57580.1 | expressed protein                                                                              | Chr3  | 32829131 | 32832506 - | 3  | 2575 | 4.55 |
| LOC_Os11g06650.1 | transcription elongation factor protein, putative, expressed                                   | Chr11 | 3233711  | 3236546 -  | 9  | 1663 | 4.55 |
| LOC_Os11g26890.2 | expressed protein                                                                              | Chr11 | 15447175 | 15450089 - | 3  | 1722 | 4.55 |
| LOC_Os01g65640.1 | expressed protein                                                                              | Chr1  | 38106331 | 38107815 + | 1  | 1517 | 4.55 |

|                  |                                                                             |       |          |            |    |      |      |
|------------------|-----------------------------------------------------------------------------|-------|----------|------------|----|------|------|
| LOC_Os01g08370.1 | symbiosis-related disease resistance protein, putative, expressed           | Chr1  | 4106828  | 4108541 +  | 1  | 1746 | 4.55 |
| LOC_Os05g50980.1 | SET domain containing protein, expressed                                    | Chr5  | 29251632 | 29255944 + | 11 | 2188 | 4.55 |
| LOC_Os01g25600.2 | tetratricopeptide repeat domain containing protein, expressed               | Chr1  | 14507658 | 14513133 - | 7  | 2388 | 4.55 |
| LOC_Os03g40170.2 | zinc finger, C3HC4 type domain containing protein, expressed                | Chr3  | 22332262 | 22335094 + | 4  | 1770 | 4.55 |
| LOC_Os02g52130.2 | OsFBX61 - F-box domain containing protein, expressed                        | Chr2  | 31908532 | 31911652 + | 4  | 2123 | 4.55 |
| LOC_Os02g52130.3 | OsFBX61 - F-box domain containing protein, expressed                        | Chr2  | 31908532 | 31911652 + | 3  | 2292 | 4.55 |
| LOC_Os02g34990.2 | ACT domain containing protein, putative, expressed                          | Chr2  | 20985923 | 20994251 + | 9  | 2678 | 4.55 |
| LOC_Os11g34060.1 | retrotransposon, putative, centromere-specific, expressed                   | Chr11 | 19910516 | 19912154 + | 2  | 304  | 4.55 |
| LOC_Os05g19470.2 | expressed protein                                                           | Chr5  | 11314409 | 11319996 + | 5  | 1259 | 4.55 |
| LOC_Os04g33200.2 | heparan-alpha-glucosaminide N-acetyltransferase, putative, expressed        | Chr4  | 20083916 | 20086861 - | 12 | 1889 | 4.55 |
| LOC_Os04g33200.1 | heparan-alpha-glucosaminide N-acetyltransferase, putative, expressed        | Chr4  | 20083916 | 20091821 - | 13 | 2226 | 4.55 |
| LOC_Os01g53560.1 | phosphoesterase, putative, expressed                                        | Chr1  | 30753219 | 30761219 + | 14 | 2382 | 4.55 |
| LOC_Os09g01680.3 | DNA repair protein RAD51 homolog 4, putative, expressed                     | Chr9  | 485012   | 490816 -   | 9  | 1526 | 4.55 |
| LOC_Os05g04890.1 | expressed protein                                                           | Chr5  | 2351573  | 2354876 -  | 5  | 2767 | 4.55 |
| LOC_Os05g39374.3 | expressed protein                                                           | Chr5  | 23096724 | 23097842 + | 3  | 1010 | 4.56 |
| LOC_Os04g20200.1 | expressed protein                                                           | Chr4  | 11258169 | 11261439 + | 5  | 968  | 4.56 |
| LOC_Os06g45340.1 | peptidyl-prolyl cis-trans isomerase, FKBP-type, putative, expressed         | Chr6  | 27402362 | 27403768 - | 4  | 1137 | 4.56 |
| LOC_Os06g45340.3 | peptidyl-prolyl cis-trans isomerase, FKBP-type, putative, expressed         | Chr6  | 27402362 | 27403746 - | 3  | 1187 | 4.56 |
| LOC_Os06g45340.2 | peptidyl-prolyl cis-trans isomerase, FKBP-type, putative, expressed         | Chr6  | 27402362 | 27403746 - | 3  | 1223 | 4.56 |
| LOC_Os08g40680.1 | glycosyl hydrolase, putative, expressed                                     | Chr8  | 25758851 | 25759949 - | 1  | 1131 | 4.56 |
| LOC_Os01g54040.2 | ATP-dependent protease La, putative, expressed                              | Chr1  | 31083055 | 31088007 - | 10 | 2197 | 4.56 |
| LOC_Os01g28540.2 | stress regulated protein, putative, expressed                               | Chr1  | 15975324 | 15980624 + | 6  | 1480 | 4.56 |
| LOC_Os02g50280.1 | pentatricopeptide, putative, expressed                                      | Chr2  | 30698990 | 30701615 + | 1  | 2658 | 4.56 |
| LOC_Os01g54030.1 | NADP-dependent malic enzyme, putative, expressed                            | Chr1  | 31076571 | 31081377 + | 19 | 2789 | 4.56 |
| LOC_Os02g31890.1 | ZOS2-08 - C2H2 zinc finger protein, expressed                               | Chr2  | 18839194 | 18842419 - | 3  | 1575 | 4.56 |
| LOC_Os04g56290.1 | aldose 1-epimerase, putative, expressed                                     | Chr4  | 33557307 | 33563979 + | 9  | 2502 | 4.56 |
| LOC_Os03g11310.1 | PPR repeat domain containing protein, putative, expressed                   | Chr3  | 5817877  | 5820748 +  | 2  | 2177 | 4.56 |
| LOC_Os03g41120.1 | expressed protein                                                           | Chr3  | 22856683 | 22861392 - | 3  | 1355 | 4.56 |
| LOC_Os09g17680.1 | NAD kinase, putative, expressed                                             | Chr9  | 10810135 | 10812498 - | 5  | 1422 | 4.56 |
| LOC_Os08g37480.2 | mediator of RNA polymerase II transcription subunit 22, putative, expressed | Chr8  | 23744513 | 23747027 - | 3  | 1066 | 4.56 |
| LOC_Os01g64680.1 | bolA, putative, expressed                                                   | Chr1  | 37526134 | 37526646 - | 3  | 381  | 4.56 |
| LOC_Os08g38910.1 | caffeoyl-CoA O-methyltransferase, putative, expressed                       | Chr8  | 24592945 | 24597553 - | 5  | 1697 | 4.56 |
| LOC_Os08g38910.2 | caffeoyl-CoA O-methyltransferase, putative, expressed                       | Chr8  | 24592945 | 24594866 - | 4  | 1619 | 4.56 |
| LOC_Os05g50160.1 | DUF617 domain containing protein, expressed                                 | Chr5  | 28743375 | 28744604 - | 1  | 1262 | 4.56 |
| LOC_Os11g29350.1 | ELMO/CED-12 family protein, putative, expressed                             | Chr11 | 17028206 | 17032606 + | 9  | 1667 | 4.57 |
| LOC_Os11g29350.2 | ELMO/CED-12 family protein, putative, expressed                             | Chr11 | 17030037 | 17032606 + | 9  | 1438 | 4.57 |
| LOC_Os08g39120.1 | expressed protein                                                           | Chr8  | 24712425 | 24715665 + | 2  | 2446 | 4.57 |
| LOC_Os10g06630.1 | peptidyl-prolyl cis-trans isomerase, putative, expressed                    | Chr10 | 3438472  | 3439486 +  | 1  | 1047 | 4.57 |
| LOC_Os02g10590.2 | peptidyl-prolyl cis-trans isomerase, FKBP-type, putative, expressed         | Chr2  | 5568324  | 5569801 -  | 6  | 986  | 4.57 |
| LOC_Os07g06990.2 | expressed protein                                                           | Chr7  | 3444957  | 3446867 +  | 1  | 1943 | 4.57 |
| LOC_Os07g06990.1 | expressed protein                                                           | Chr7  | 3444957  | 3446867 +  | 2  | 1111 | 4.57 |
| LOC_Os02g34960.1 | pentatricopeptide, putative, expressed                                      | Chr2  | 20966831 | 20969333 + | 1  | 2535 | 4.57 |
| LOC_Os02g26560.1 | expressed protein                                                           | Chr2  | 15594984 | 15598135 + | 2  | 3120 | 4.57 |
| LOC_Os03g37690.1 | retrotransposon protein, putative, unclassified                             | Chr3  | 20901689 | 20902867 + | 3  | 732  | 4.57 |
| LOC_Os09g31270.1 | polygalacturonase, putative, expressed                                      | Chr9  | 18801144 | 18803450 - | 3  | 1826 | 4.57 |

|                  |                                                                                  |       |          |          |   |    |      |      |
|------------------|----------------------------------------------------------------------------------|-------|----------|----------|---|----|------|------|
| LOC_Os07g36260.1 | transposon protein, putative, Pong sub-class, expressed                          | Chr7  | 21674947 | 21677377 | - | 5  | 1828 | 4.57 |
| LOC_Os03g46490.1 | 40S ribosomal protein S21, putative, expressed                                   | Chr3  | 26308552 | 26312894 | - | 4  | 746  | 4.57 |
| LOC_Os08g38910.3 | caffeoyl-CoA O-methyltransferase, putative, expressed                            | Chr8  | 24592945 | 24594866 | - | 3  | 1819 | 4.57 |
| LOC_Os08g38910.4 | caffeoyl-CoA O-methyltransferase, putative, expressed                            | Chr8  | 24592945 | 24594495 | - | 2  | 1531 | 4.57 |
| LOC_Os01g58690.3 | endonuclease/exonuclease/phosphatase family domain containing protein, expressed | Chr1  | 33926531 | 33929814 | + | 8  | 1620 | 4.58 |
| LOC_Os04g44210.1 | expressed protein                                                                | Chr4  | 26168609 | 26173905 | - | 9  | 2268 | 4.58 |
| LOC_Os01g47330.1 | ribosomal protein L7/L12 C-terminal domain containing protein, expressed         | Chr1  | 27041791 | 27042669 | + | 1  | 911  | 4.58 |
| LOC_Os03g17760.1 | RNA recognition motif containing protein, putative, expressed                    | Chr3  | 9878025  | 9880930  | - | 6  | 1788 | 4.58 |
| LOC_Os05g44020.1 | acetyltransferase, GNAT family, putative, expressed                              | Chr5  | 25608292 | 25609196 | + | 1  | 937  | 4.58 |
| LOC_Os06g04920.2 | zinc finger family protein, putative, expressed                                  | Chr6  | 2162622  | 2169683  | - | 4  | 1476 | 4.58 |
| LOC_Os07g09450.1 | heat shock protein DnaJ, putative, expressed                                     | Chr7  | 4977967  | 4981656  | - | 3  | 937  | 4.58 |
| LOC_Os01g70960.2 | cytochrome c1-1, heme protein, mitochondrial precursor, putative, expressed      | Chr1  | 41074429 | 41079281 | + | 7  | 2885 | 4.58 |
| LOC_Os06g41410.1 | expressed protein                                                                | Chr6  | 24819853 | 24830207 | + | 4  | 1013 | 4.58 |
| LOC_Os06g07932.1 | flavonol synthase/flavanone 3-hydroxylase, putative, expressed                   | Chr6  | 3854646  | 3857393  | + | 6  | 1871 | 4.58 |
| LOC_Os02g03440.1 | LSM domain containing protein, expressed                                         | Chr2  | 1399613  | 1401222  | - | 6  | 618  | 4.58 |
| LOC_Os02g35890.1 | expressed protein                                                                | Chr2  | 21561848 | 21563276 | - | 3  | 858  | 4.58 |
| LOC_Os04g53370.1 | acyltransferase, putative, expressed                                             | Chr4  | 31786589 | 31788246 | + | 5  | 1417 | 4.58 |
| LOC_Os08g02540.1 | adenylate kinase, putative, expressed                                            | Chr8  | 1046937  | 1050009  | + | 4  | 1418 | 4.58 |
| LOC_Os01g26174.1 | OsWAK5 - OsWAK receptor-like protein kinase, expressed                           | Chr1  | 14825144 | 14828267 | + | 3  | 2274 | 4.58 |
| LOC_Os11g05860.1 | harpin-induced protein 1 domain containing protein, expressed                    | Chr11 | 2738389  | 2739467  | - | 1  | 1111 | 4.58 |
| LOC_Os07g09625.1 | expressed protein                                                                | Chr7  | 5113934  | 5115785  | - | 2  | 1107 | 4.58 |
| LOC_Os05g40150.1 | RGH2B, putative, expressed                                                       | Chr5  | 23580975 | 23585400 | - | 3  | 3771 | 4.58 |
| LOC_Os12g17070.2 | radical SAM enzyme, putative, expressed                                          | Chr12 | 9766670  | 9772331  | - | 3  | 2158 | 4.58 |
| LOC_Os07g09800.1 | expressed protein                                                                | Chr7  | 5216004  | 5217096  | - | 1  | 1125 | 4.58 |
| LOC_Os08g19105.1 | expressed protein                                                                | Chr8  | 11399711 | 11402862 | - | 5  | 1286 | 4.59 |
| LOC_Os09g21689.1 | expressed protein                                                                | Chr9  | 13140485 | 13147163 | - | 5  | 1445 | 4.59 |
| LOC_Os01g34430.1 | expressed protein                                                                | Chr1  | 18979441 | 18989543 | + | 12 | 1787 | 4.59 |
| LOC_Os05g23670.1 | transcription factor jumonji, putative, expressed                                | Chr5  | 13573857 | 13579655 | - | 11 | 3774 | 4.59 |
| LOC_Os03g56000.1 | PHLOEM 2-LIKE A10, putative, expressed                                           | Chr3  | 31874975 | 31876571 | + | 1  | 1629 | 4.59 |
| LOC_Os01g44050.1 | siroheme synthase, putative, expressed                                           | Chr1  | 25234661 | 25238165 | + | 6  | 2148 | 4.59 |
| LOC_Os01g10080.2 | expressed protein                                                                | Chr1  | 5258256  | 5261017  | + | 4  | 1311 | 4.59 |
| LOC_Os02g51070.1 | starch synthase, putative, expressed                                             | Chr2  | 31232888 | 31238210 | - | 8  | 3460 | 4.59 |
| LOC_Os08g35948.1 | expressed protein                                                                | Chr8  | 22670558 | 22675587 | - | 4  | 1688 | 4.59 |
| LOC_Os08g31460.1 | GTPase of unknown function domain containing protein, putative, expressed        | Chr8  | 19456437 | 19460442 | + | 10 | 2423 | 4.59 |
| LOC_Os03g49600.3 | Os3bglu7 - beta-glucosidase, exo-beta-glucanase, expressed                       | Chr3  | 28240290 | 28245347 | - | 11 | 2429 | 4.59 |
| LOC_Os03g49600.2 | Os3bglu7 - beta-glucosidase, exo-beta-glucanase, expressed                       | Chr3  | 28240285 | 28245347 | - | 11 | 2443 | 4.59 |
| LOC_Os03g49600.1 | Os3bglu7 - beta-glucosidase, exo-beta-glucanase, expressed                       | Chr3  | 28240285 | 28245347 | - | 11 | 2447 | 4.59 |
| LOC_Os03g49600.5 | Os3bglu7 - beta-glucosidase, exo-beta-glucanase, expressed                       | Chr3  | 28240285 | 28245347 | - | 10 | 2554 | 4.59 |
| LOC_Os02g53384.1 | expressed protein                                                                | Chr2  | 32678757 | 32681169 | + | 4  | 2274 | 4.59 |
| LOC_Os01g55960.1 | pentatricopeptide, putative, expressed                                           | Chr1  | 32231125 | 32232573 | - | 1  | 1481 | 4.60 |
| LOC_Os06g12790.3 | ras-related protein, putative, expressed                                         | Chr6  | 6990939  | 6994556  | + | 6  | 2965 | 4.60 |
| LOC_Os01g56860.1 | WD domain, G-beta repeat domain containing protein, expressed                    | Chr1  | 32838523 | 32842473 | - | 12 | 2203 | 4.60 |
| LOC_Os01g59800.3 | EAP30/Vps36 family domain containing protein, expressed                          | Chr1  | 34585608 | 34587173 | - | 2  | 1395 | 4.60 |
| LOC_Os02g58170.1 | transposon protein, putative, unclassified, expressed                            | Chr2  | 35595613 | 35603610 | + | 13 | 2996 | 4.60 |
| LOC_Os12g10720.1 | glutathione S-transferase, putative, expressed                                   | Chr12 | 5756436  | 5760088  | + | 10 | 1608 | 4.60 |

|                  |                                                                                    |       |          |            |    |      |      |
|------------------|------------------------------------------------------------------------------------|-------|----------|------------|----|------|------|
| LOC_Os12g10720.2 | glutathione S-transferase, putative, expressed                                     | Chr12 | 5756436  | 5760088 +  | 10 | 1616 | 4.60 |
| LOC_Os06g47834.2 | expressed protein                                                                  | Chr6  | 28952913 | 28953456 + | 1  | 576  | 4.60 |
| LOC_Os06g47834.1 | expressed protein                                                                  | Chr6  | 28950823 | 28953456 + | 2  | 632  | 4.60 |
| LOC_Os07g02110.1 | expressed protein                                                                  | Chr7  | 667744   | 669217 +   | 2  | 865  | 4.60 |
| LOC_Os02g52130.1 | OsFBX61 - F-box domain containing protein, expressed                               | Chr2  | 31908532 | 31911697 + | 4  | 2173 | 4.60 |
| LOC_Os09g15639.1 | expressed protein                                                                  | Chr9  | 9544294  | 9546480 +  | 2  | 1731 | 4.60 |
| LOC_Os01g47650.1 | vacuolar protein sorting-associated protein 16, putative, expressed                | Chr1  | 27257381 | 27266486 + | 15 | 3527 | 4.60 |
| LOC_Os12g42760.1 | type IIB DNA topoisomerase, putative, expressed                                    | Chr12 | 26577956 | 26581040 + | 3  | 2178 | 4.60 |
| LOC_Os08g38990.2 | WRKY30, expressed                                                                  | Chr8  | 24645880 | 24649829 - | 8  | 2864 | 4.60 |
| LOC_Os08g38990.4 | WRKY30, expressed                                                                  | Chr8  | 24645860 | 24649860 - | 8  | 2915 | 4.60 |
| LOC_Os01g62260.1 | thaumatin, putative, expressed                                                     | Chr1  | 36029785 | 36030969 - | 1  | 1217 | 4.60 |
| LOC_Os04g39970.1 | vacuolar sorting protein 9 domain-containing protein, putative, expressed          | Chr4  | 23790789 | 23792871 - | 2  | 1193 | 4.60 |
| LOC_Os03g50620.1 | ATP binding protein, putative, expressed                                           | Chr3  | 28901044 | 28906929 + | 9  | 1806 | 4.60 |
| LOC_Os03g02110.1 | WD domain, G-beta repeat domain containing protein, expressed                      | Chr3  | 674687   | 681881 +   | 20 | 5491 | 4.60 |
| LOC_Os03g02110.2 | WD domain, G-beta repeat domain containing protein, expressed                      | Chr3  | 674687   | 681881 +   | 20 | 5486 | 4.60 |
| LOC_Os01g33784.1 | lipase family protein, putative, expressed                                         | Chr1  | 18595126 | 18597589 + | 5  | 1693 | 4.61 |
| LOC_Os08g09300.2 | expressed protein                                                                  | Chr8  | 5395453  | 5398851 +  | 5  | 945  | 4.61 |
| LOC_Os01g07250.1 | saposin-like type B, region 1 family protein, putative, expressed                  | Chr1  | 3422011  | 3425559 +  | 6  | 1913 | 4.61 |
| LOC_Os08g37840.1 | phosphate-induced protein 1 conserved region domain containing protein, expressed  | Chr8  | 23969345 | 23970659 - | 1  | 1347 | 4.61 |
| LOC_Os05g47890.1 | WD domain, G-beta repeat domain containing protein, expressed                      | Chr5  | 27459362 | 27461864 - | 2  | 1476 | 4.61 |
| LOC_Os01g28540.1 | stress regulated protein, putative, expressed                                      | Chr1  | 15975324 | 15980624 + | 7  | 1539 | 4.61 |
| LOC_Os03g49600.4 | Os3bglu7 - beta-glucosidase, exo-beta-glucanase, expressed                         | Chr3  | 28240285 | 28245347 - | 9  | 2587 | 4.61 |
| LOC_Os03g46400.1 | UDP-glucuronosyl and UDP-glucosyl transferase domain containing protein, expressed | Chr3  | 26237169 | 26239446 - | 1  | 2310 | 4.61 |
| LOC_Os04g49540.1 | expressed protein                                                                  | Chr4  | 29541427 | 29544700 - | 4  | 2139 | 4.61 |
| LOC_Os11g45750.1 | WRKY125, expressed                                                                 | Chr11 | 27683753 | 27695070 - | 5  | 4981 | 4.61 |
| LOC_Os03g15240.1 | expressed protein                                                                  | Chr3  | 8337593  | 8339497 +  | 3  | 375  | 4.61 |
| LOC_Os02g44740.1 | expressed protein                                                                  | Chr2  | 27105464 | 27110709 - | 3  | 1821 | 4.61 |
| LOC_Os02g54870.1 | expressed protein                                                                  | Chr2  | 33604348 | 33606002 + | 2  | 1597 | 4.62 |
| LOC_Os12g43000.1 | retrotransposon protein, putative, unclassified, expressed                         | Chr12 | 26714543 | 26718178 - | 7  | 2884 | 4.62 |
| LOC_Os11g42430.1 | transporter family protein, putative, expressed                                    | Chr11 | 25536945 | 25540452 - | 17 | 2400 | 4.62 |
| LOC_Os02g53150.1 | expressed protein                                                                  | Chr2  | 32535375 | 32536898 - | 1  | 1556 | 4.62 |
| LOC_Os06g30420.1 | PPR repeat domain containing protein, putative, expressed                          | Chr6  | 17576997 | 17578925 - | 1  | 1961 | 4.62 |
| LOC_Os05g19470.5 | expressed protein                                                                  | Chr5  | 11314659 | 11319175 + | 5  | 1182 | 4.62 |
| LOC_Os05g45870.1 | OsFBL25 - F-box domain and LRR containing protein, expressed                       | Chr5  | 26575670 | 26578440 + | 4  | 2203 | 4.62 |
| LOC_Os01g45520.1 | D-mannose binding lectin family protein, expressed                                 | Chr1  | 25836151 | 25839983 + | 3  | 2328 | 4.62 |
| LOC_Os10g07400.2 | disease resistance RPP13-like protein 1, putative, expressed                       | Chr10 | 3908102  | 3912672 -  | 3  | 3330 | 4.62 |
| LOC_Os04g16450.1 | aquaporin protein, putative, expressed                                             | Chr4  | 8948206  | 8950028 -  | 3  | 1725 | 4.62 |
| LOC_Os04g51809.2 | expressed protein                                                                  | Chr4  | 30716167 | 30722227 + | 3  | 1881 | 4.62 |
| LOC_Os02g19629.2 | expressed protein                                                                  | Chr2  | 11470576 | 11474785 - | 3  | 813  | 4.62 |
| LOC_Os11g07960.1 | transferase family protein, putative, expressed                                    | Chr11 | 4128529  | 4130571 -  | 2  | 1560 | 4.62 |
| LOC_Os01g62890.1 | prenylated rab acceptor, putative, expressed                                       | Chr1  | 36420024 | 36422893 - | 8  | 1482 | 4.62 |
| LOC_Os01g62890.2 | prenylated rab acceptor, putative, expressed                                       | Chr1  | 36420027 | 36422893 - | 7  | 1523 | 4.62 |
| LOC_Os05g31330.1 | retrotransposon protein, putative, unclassified, expressed                         | Chr5  | 18209847 | 18211697 - | 1  | 1883 | 4.62 |
| LOC_Os03g19350.1 | OsLonP1 - Putative Lon protease homologue, expressed                               | Chr3  | 10887716 | 10898989 - | 18 | 3541 | 4.62 |
| LOC_Os04g26330.1 | expressed protein                                                                  | Chr4  | 15350426 | 15352064 - | 2  | 397  | 4.62 |

|                  |                                                                                     |       |          |            |    |      |      |
|------------------|-------------------------------------------------------------------------------------|-------|----------|------------|----|------|------|
| LOC_Os12g22760.1 | expressed protein                                                                   | Chr12 | 12845194 | 12851765 + | 10 | 2766 | 4.62 |
| LOC_Os02g54000.1 | mRNA cap guanine-N7 methyltransferase 2, putative, expressed                        | Chr2  | 33073135 | 33077179 + | 12 | 2283 | 4.62 |
| LOC_Os10g13800.1 | ufm1-conjugating enzyme 1, putative, expressed                                      | Chr10 | 7496087  | 7498986 +  | 3  | 1652 | 4.62 |
| LOC_Os02g52130.7 | OsFBX61 - F-box domain containing protein, expressed                                | Chr2  | 31908532 | 31911652 + | 3  | 2182 | 4.62 |
| LOC_Os02g52130.8 | OsFBX61 - F-box domain containing protein, expressed                                | Chr2  | 31908532 | 31911652 + | 3  | 2187 | 4.62 |
| LOC_Os02g52130.6 | OsFBX61 - F-box domain containing protein, expressed                                | Chr2  | 31908532 | 31911652 + | 3  | 2217 | 4.62 |
| LOC_Os02g52130.9 | OsFBX61 - F-box domain containing protein, expressed                                | Chr2  | 31908532 | 31911652 + | 2  | 2351 | 4.62 |
| LOC_Os04g32590.1 | transcription factor, putative, expressed                                           | Chr4  | 19613118 | 19615783 - | 3  | 1086 | 4.63 |
| LOC_Os06g04920.1 | zinc finger family protein, putative, expressed                                     | Chr6  | 2162737  | 2169683 -  | 5  | 1464 | 4.63 |
| LOC_Os06g47250.1 | DUF292 domain containing protein, expressed                                         | Chr6  | 28644140 | 28648820 - | 7  | 2507 | 4.63 |
| LOC_Os02g39350.1 | eukaryotic translation initiation factor 2A, putative, expressed                    | Chr2  | 23749032 | 23753236 - | 13 | 2532 | 4.63 |
| LOC_Os01g04900.1 | peptidase M50 family protein, putative, expressed                                   | Chr1  | 2266281  | 2271051 -  | 13 | 2470 | 4.63 |
| LOC_Os05g39374.2 | expressed protein                                                                   | Chr5  | 23096724 | 23097842 + | 2  | 1075 | 4.63 |
| LOC_Os05g39374.1 | expressed protein                                                                   | Chr5  | 23096724 | 23097842 + | 1  | 1151 | 4.63 |
| LOC_Os10g42090.1 | AGAP003819-PA, putative, expressed                                                  | Chr10 | 22636085 | 22640106 + | 6  | 1106 | 4.63 |
| LOC_Os02g39290.2 | TRAF-type zinc finger family protein, expressed                                     | Chr2  | 23726238 | 23729125 - | 2  | 714  | 4.63 |
| LOC_Os11g01340.3 | omega-3 fatty acid desaturase, chloroplast precursor, putative, expressed           | Chr11 | 199733   | 203904 -   | 8  | 2103 | 4.63 |
| LOC_Os11g01340.2 | omega-3 fatty acid desaturase, chloroplast precursor, putative, expressed           | Chr11 | 199733   | 203904 -   | 8  | 2107 | 4.63 |
| LOC_Os11g01340.4 | omega-3 fatty acid desaturase, chloroplast precursor, putative, expressed           | Chr11 | 199733   | 203904 -   | 7  | 2155 | 4.63 |
| LOC_Os02g57990.1 | methionine adenosyltransferase regulatory beta subunit-related, putative, expressed | Chr2  | 35507155 | 35510880 + | 6  | 1435 | 4.63 |
| LOC_Os01g47810.1 | S-locus-like receptor protein kinase, putative, expressed                           | Chr1  | 27366317 | 27368704 - | 1  | 2420 | 4.63 |
| LOC_Os02g57740.1 | expressed protein                                                                   | Chr2  | 35355316 | 35357125 + | 6  | 1104 | 4.63 |
| LOC_Os01g63220.2 | kinase, pfkB family, putative, expressed                                            | Chr1  | 36640943 | 36647156 + | 4  | 2486 | 4.63 |
| LOC_Os02g52390.1 | M16 domain containing zinc peptidase, putative, expressed                           | Chr2  | 32062238 | 32070456 + | 19 | 5294 | 4.63 |
| LOC_Os07g33050.1 | expressed protein                                                                   | Chr7  | 19740385 | 19742856 - | 4  | 2332 | 4.63 |
| LOC_Os08g16830.1 | retrotransposon protein, putative, SINE subclass, expressed                         | Chr8  | 10294174 | 10295184 - | 2  | 926  | 4.63 |
| LOC_Os02g50100.1 | SET domain-containing protein, putative, expressed                                  | Chr2  | 30593495 | 30596223 + | 5  | 1885 | 4.63 |
| LOC_Os01g03720.1 | MYB family transcription factor, putative, expressed                                | Chr1  | 1549229  | 1551011 -  | 3  | 1685 | 4.64 |
| LOC_Os08g21700.1 | DCL, chloroplast precursor, putative, expressed                                     | Chr8  | 13000764 | 13005578 - | 3  | 979  | 4.64 |
| LOC_Os11g38920.2 | HVA22, putative, expressed                                                          | Chr11 | 23171897 | 23176348 + | 6  | 1675 | 4.64 |
| LOC_Os01g68440.3 | expressed protein                                                                   | Chr1  | 39775467 | 39776787 + | 5  | 982  | 4.64 |
| LOC_Os12g40770.1 | ankyrin-1, putative, expressed                                                      | Chr12 | 25236011 | 25240748 + | 11 | 2165 | 4.64 |
| LOC_Os12g29520.3 | auxin response factor, putative, expressed                                          | Chr12 | 17571537 | 17577896 - | 15 | 4099 | 4.64 |
| LOC_Os12g29520.4 | auxin response factor, putative, expressed                                          | Chr12 | 17571537 | 17577896 - | 15 | 4099 | 4.64 |
| LOC_Os12g29520.1 | auxin response factor, putative, expressed                                          | Chr12 | 17571537 | 17577896 - | 15 | 4102 | 4.64 |
| LOC_Os12g29520.2 | auxin response factor, putative, expressed                                          | Chr12 | 17571537 | 17577896 - | 15 | 4119 | 4.64 |
| LOC_Os12g29520.5 | auxin response factor, putative, expressed                                          | Chr12 | 17571537 | 17577896 - | 14 | 4149 | 4.64 |
| LOC_Os11g43960.1 | mitochondrial carrier protein, putative, expressed                                  | Chr11 | 26549874 | 26552470 + | 3  | 1705 | 4.64 |
| LOC_Os07g05960.1 | expressed protein                                                                   | Chr7  | 2883039  | 2892647 -  | 28 | 5279 | 4.64 |
| LOC_Os01g61410.3 | NADH-ubiquinone oxidoreductase, mitochondrial precursor, putative, expressed        | Chr1  | 35508867 | 35512813 + | 7  | 1863 | 4.64 |
| LOC_Os10g42090.2 | AGAP003819-PA, putative, expressed                                                  | Chr10 | 22636085 | 22640106 + | 4  | 1974 | 4.64 |
| LOC_Os05g26660.1 | NADH-ubiquinone oxidoreductase, mitochondrial precursor, putative, expressed        | Chr5  | 15482300 | 15488221 - | 10 | 2514 | 4.64 |
| LOC_Os11g39350.2 | expressed protein                                                                   | Chr11 | 23421717 | 23426690 - | 3  | 2480 | 4.64 |
| LOC_Os12g16410.2 | isoflavone reductase, putative, expressed                                           | Chr12 | 9398428  | 9400411 -  | 2  | 1006 | 4.64 |
| LOC_Os03g04490.1 | cyclin-dependent kinase inhibitor, putative, expressed                              | Chr3  | 2088673  | 2091770 +  | 3  | 1257 | 4.64 |

|                  |                                                                                     |       |          |            |    |      |      |
|------------------|-------------------------------------------------------------------------------------|-------|----------|------------|----|------|------|
| LOC_Os07g01890.1 | expressed protein                                                                   | Chr7  | 535602   | 538037 -   | 4  | 2150 | 4.64 |
| LOC_Os07g36260.2 | transposon protein, putative, Pong sub-class, expressed                             | Chr7  | 21674777 | 21678256 - | 5  | 2254 | 4.64 |
| LOC_Os07g01890.2 | expressed protein                                                                   | Chr7  | 535602   | 538317 -   | 3  | 2584 | 4.64 |
| LOC_Os10g35030.2 | IAP100, putative, expressed                                                         | Chr10 | 18687523 | 18693653 - | 11 | 2803 | 4.64 |
| LOC_Os11g35740.1 | retrotransposon protein, putative, Ty1-copia subclass, expressed                    | Chr11 | 20979819 | 20984348 - | 4  | 3323 | 4.64 |
| LOC_Os05g01230.1 | zinc finger, C3HC4 type domain containing protein, expressed                        | Chr5  | 155313   | 160214 +   | 9  | 3110 | 4.64 |
| LOC_Os12g06620.1 | deoxyhypusine hydroxylase, putative, expressed                                      | Chr12 | 3208470  | 3211798 -  | 8  | 1891 | 4.65 |
| LOC_Os04g29350.1 | retrotransposon protein, putative, unclassified, expressed                          | Chr4  | 17425173 | 17437135 - | 14 | 4486 | 4.65 |
| LOC_Os04g45821.1 | expressed protein                                                                   | Chr4  | 27133034 | 27135595 + | 4  | 1262 | 4.65 |
| LOC_Os01g66230.1 | csAtPR5, putative, expressed                                                        | Chr1  | 38471695 | 38475218 - | 3  | 1981 | 4.65 |
| LOC_Os04g39270.1 | indole-3-glycerol phosphate synthase, chloroplast precursor, putative, expressed    | Chr4  | 23362168 | 23365712 - | 10 | 1893 | 4.65 |
| LOC_Os03g18830.2 | programmed cell death protein 2, putative, expressed                                | Chr3  | 10552724 | 10556172 - | 10 | 1930 | 4.65 |
| LOC_Os06g45380.1 | vacuolar-sorting receptor precursor, putative, expressed                            | Chr6  | 27433318 | 27441148 + | 14 | 3364 | 4.65 |
| LOC_Os01g17020.1 | glycosyl hydrolases family 17 protein, putative, expressed                          | Chr1  | 9750080  | 9753770 +  | 3  | 1303 | 4.65 |
| LOC_Os08g15460.2 | preprotein translocase subunit secY, putative, expressed                            | Chr8  | 9405688  | 9411734 +  | 8  | 2485 | 4.65 |
| LOC_Os05g13300.1 | helicase, putative, expressed                                                       | Chr5  | 7367166  | 7374483 -  | 11 | 3695 | 4.65 |
| LOC_Os01g20740.1 | retrotransposon protein, putative, unclassified, expressed                          | Chr1  | 11549976 | 11552644 - | 2  | 2365 | 4.65 |
| LOC_Os10g35750.1 | pentatricopeptide, putative, expressed                                              | Chr10 | 19108875 | 19111044 + | 2  | 2142 | 4.65 |
| LOC_Os04g33060.1 | NAD dependent epimerase/dehydratase family protein, putative, expressed             | Chr4  | 20015750 | 20019634 + | 7  | 1643 | 4.65 |
| LOC_Os09g38720.1 | mTERF domain containing protein, expressed                                          | Chr9  | 22255999 | 22259924 + | 10 | 2324 | 4.65 |
| LOC_Os01g21960.1 | serine/threonine-protein kinase, putative, expressed                                | Chr1  | 12326486 | 12331776 + | 8  | 2644 | 4.65 |
| LOC_Os11g43900.1 | translationally-controlled tumor protein, putative, expressed                       | Chr11 | 26510871 | 26513134 - | 5  | 1139 | 4.65 |
| LOC_Os11g43900.2 | translationally-controlled tumor protein, putative, expressed                       | Chr11 | 26510871 | 26513134 - | 4  | 1297 | 4.65 |
| LOC_Os05g15360.6 | expressed protein                                                                   | Chr5  | 8691776  | 8696460 -  | 2  | 4666 | 4.65 |
| LOC_Os02g57990.4 | methionine adenosyltransferase regulatory beta subunit-related, putative, expressed | Chr2  | 35507155 | 35510879 + | 6  | 1565 | 4.65 |
| LOC_Os02g58580.4 | cation efflux family protein, putative, expressed                                   | Chr2  | 35807045 | 35812446 + | 9  | 1742 | 4.65 |
| LOC_Os02g58580.1 | cation efflux family protein, putative, expressed                                   | Chr2  | 35807045 | 35812446 + | 9  | 1720 | 4.65 |
| LOC_Os02g58580.2 | cation efflux family protein, putative, expressed                                   | Chr2  | 35807045 | 35812446 + | 10 | 1677 | 4.65 |
| LOC_Os01g16550.1 | expressed protein                                                                   | Chr1  | 9394361  | 9396460 -  | 3  | 357  | 4.65 |
| LOC_Os11g19720.1 | recA protein, putative, expressed                                                   | Chr11 | 11361743 | 11368591 - | 8  | 2078 | 4.65 |
| LOC_Os01g54740.1 | transposon protein, putative, unclassified, expressed                               | Chr1  | 31497674 | 31498418 + | 1  | 777  | 4.65 |
| LOC_Os11g43600.1 | peptide chain release factor protein, putative, expressed                           | Chr11 | 26306075 | 26310454 + | 15 | 2133 | 4.66 |
| LOC_Os05g31040.1 | cytokinin dehydrogenase precursor, putative, expressed                              | Chr5  | 18033251 | 18035399 + | 5  | 1963 | 4.66 |
| LOC_Os02g22084.1 | expressed protein                                                                   | Chr2  | 13137869 | 13141343 + | 3  | 2585 | 4.66 |
| LOC_Os07g48810.2 | parvulin-type peptidyl prolyl cis/trans isomerase, putative, expressed              | Chr7  | 29209563 | 29212778 + | 7  | 1463 | 4.66 |
| LOC_Os02g48190.1 | expressed protein                                                                   | Chr2  | 29502650 | 29506701 - | 2  | 2452 | 4.66 |
| LOC_Os04g25570.1 | protein phosphatase 2C, putative, expressed                                         | Chr4  | 14821182 | 14826775 - | 5  | 2213 | 4.66 |
| LOC_Os05g31780.2 | adaptor complexes medium subunit family domain containing protein, expressed        | Chr5  | 18508440 | 18512695 - | 8  | 2124 | 4.66 |
| LOC_Os03g58930.1 | expressed protein                                                                   | Chr3  | 33553558 | 33556161 + | 5  | 859  | 4.66 |
| LOC_Os06g15820.1 | NHL repeat-containing protein, putative, expressed                                  | Chr6  | 8977312  | 8981633 -  | 7  | 2384 | 4.66 |
| LOC_Os03g30092.1 | expressed protein                                                                   | Chr3  | 17172464 | 17174192 - | 3  | 727  | 4.66 |
| LOC_Os01g49060.1 | prenyltransferase, putative, expressed                                              | Chr1  | 28187853 | 28193358 + | 11 | 2313 | 4.66 |
| LOC_Os04g30180.1 | F-box/LRR-repeat protein 14, putative, expressed                                    | Chr4  | 18012199 | 18015102 + | 2  | 2255 | 4.67 |
| LOC_Os07g38370.1 | expressed protein                                                                   | Chr7  | 23058569 | 23059595 - | 1  | 1059 | 4.67 |
| LOC_Os07g33224.1 | BNR/Asp-box repeat family protein, putative, expressed                              | Chr7  | 19856175 | 19857873 + | 7  | 1340 | 4.67 |



|                  |                                                                                              |       |          |            |    |      |      |
|------------------|----------------------------------------------------------------------------------------------|-------|----------|------------|----|------|------|
| LOC_Os01g28690.1 | nucleoporin autopeptidase domain containing protein, expressed                               | Chr1  | 16061947 | 16067662 + | 8  | 2400 | 4.67 |
| LOC_Os10g35030.3 | IAP100, putative, expressed                                                                  | Chr10 | 18687523 | 18693653 - | 11 | 2780 | 4.67 |
| LOC_Os10g35030.1 | IAP100, putative, expressed                                                                  | Chr10 | 18687523 | 18693653 - | 11 | 2813 | 4.67 |
| LOC_Os02g05730.1 | protein kinase domain containing protein, expressed                                          | Chr2  | 2816880  | 2824133 -  | 12 | 3329 | 4.67 |
| LOC_Os11g39350.1 | expressed protein                                                                            | Chr11 | 23421717 | 23426690 - | 4  | 2660 | 4.67 |
| LOC_Os09g09490.1 | disease resistance protein RPM1, putative, expressed                                         | Chr9  | 5108210  | 5112958 +  | 4  | 3277 | 4.67 |
| LOC_Os02g45700.2 | fringe-related protein, putative, expressed                                                  | Chr2  | 27803398 | 27805631 - | 2  | 2166 | 4.67 |
| LOC_Os01g49060.2 | prenyltransferase, putative, expressed                                                       | Chr1  | 28187863 | 28193349 + | 11 | 2307 | 4.67 |
| LOC_Os08g10630.1 | metal cation transporter, putative, expressed                                                | Chr8  | 6267823  | 6270905 +  | 3  | 1819 | 4.67 |
| LOC_Os02g16709.1 | peptidase, putative, expressed                                                               | Chr2  | 9544161  | 9550627 +  | 6  | 1633 | 4.67 |
| LOC_Os10g40324.1 | expressed protein                                                                            | Chr10 | 21601595 | 21613523 + | 12 | 5035 | 4.67 |
| LOC_Os01g39890.1 | transposon protein, putative, unclassified, expressed                                        | Chr1  | 22494356 | 22500816 - | 4  | 3032 | 4.67 |
| LOC_Os08g03120.1 | retrotransposon protein, putative, Ty3-gypsy subclass, expressed                             | Chr8  | 1420754  | 1427323 +  | 5  | 2683 | 4.67 |
| LOC_Os05g27304.1 | peptide transporter PTR2, putative, expressed                                                | Chr5  | 15866239 | 15873589 + | 3  | 2279 | 4.67 |
| LOC_Os01g66890.3 | BTBZ1 - Bric-a-Brac, Tramtrack, and Broad Complex BTB domain with TAZ zinc finger and Calmod | Chr1  | 38843725 | 38846536 + | 6  | 1697 | 4.67 |
| LOC_Os07g20544.3 | aspartokinase, chloroplast precursor, putative, expressed                                    | Chr7  | 11867784 | 11874242 - | 7  | 1350 | 4.67 |
| LOC_Os03g03650.1 | POLD2 - Putative DNA polymerase delta complex subunit, expressed                             | Chr3  | 1612325  | 1616443 -  | 14 | 2433 | 4.67 |
| LOC_Os03g25050.1 | chaperonin, putative, expressed                                                              | Chr3  | 14298390 | 14301345 - | 3  | 767  | 4.67 |
| LOC_Os01g58610.1 | phosphoglycerate kinase protein, putative, expressed                                         | Chr1  | 33884920 | 33887413 + | 5  | 1318 | 4.68 |
| LOC_Os03g55870.1 | membrane associated DUF588 domain containing protein, putative, expressed                    | Chr3  | 31802310 | 31804183 + | 3  | 1559 | 4.68 |
| LOC_Os03g55870.2 | membrane associated DUF588 domain containing protein, putative, expressed                    | Chr3  | 31802310 | 31804152 + | 2  | 1604 | 4.68 |
| LOC_Os12g42970.1 | GATA zinc finger domain containing protein, expressed                                        | Chr12 | 26693519 | 26696516 + | 2  | 1520 | 4.68 |
| LOC_Os03g48390.1 | expressed protein                                                                            | Chr3  | 27552157 | 27554236 + | 2  | 328  | 4.68 |
| LOC_Os10g41240.2 | dual specificity protein phosphatase, putative, expressed                                    | Chr10 | 22161905 | 22165064 - | 5  | 1548 | 4.68 |
| LOC_Os10g20230.1 | expressed protein                                                                            | Chr10 | 10162871 | 10165082 + | 2  | 2168 | 4.68 |
| LOC_Os06g33370.1 | expressed protein                                                                            | Chr6  | 19438625 | 19441380 - | 2  | 1347 | 4.68 |
| LOC_Os04g38850.1 | expressed protein                                                                            | Chr4  | 23094207 | 23095901 - | 3  | 954  | 4.68 |
| LOC_Os12g14126.1 | retrotransposon protein, putative, Ty1-copia subclass, expressed                             | Chr12 | 8015779  | 8019944 +  | 1  | 4198 | 4.68 |
| LOC_Os01g14070.1 | 60S ribosomal protein L18a-1, putative, expressed                                            | Chr1  | 7876233  | 7878802 +  | 4  | 878  | 4.68 |
| LOC_Os01g08760.1 | choline/ethanolamine kinase, putative, expressed                                             | Chr1  | 4395154  | 4397000 +  | 7  | 1277 | 4.68 |
| LOC_Os01g08814.1 | expressed protein                                                                            | Chr1  | 4423892  | 4426884 -  | 5  | 1283 | 4.69 |
| LOC_Os01g08814.3 | expressed protein                                                                            | Chr1  | 4423892  | 4426884 -  | 5  | 1283 | 4.69 |
| LOC_Os01g08814.2 | expressed protein                                                                            | Chr1  | 4423892  | 4426884 -  | 5  | 1278 | 4.69 |
| LOC_Os01g49060.3 | prenyltransferase, putative, expressed                                                       | Chr1  | 28187863 | 28193349 + | 10 | 2364 | 4.69 |
| LOC_Os11g18044.1 | peptide transporter PTR2, putative, expressed                                                | Chr11 | 10133345 | 10144004 + | 5  | 2383 | 4.69 |
| LOC_Os02g28720.1 | spotted leaf 11, putative, expressed                                                         | Chr2  | 16981477 | 16985654 - | 2  | 1944 | 4.69 |
| LOC_Os04g38750.1 | plastid-specific 30S ribosomal protein 3, chloroplast precursor, putative, expressed         | Chr4  | 23027339 | 23029083 + | 2  | 965  | 4.69 |
| LOC_Os06g08550.1 | BTBN14 - Bric-a-Brac, Tramtrack, Broad Complex BTB domain with non-phototropic hypocotyl 3   | Chr6  | 4229184  | 4233157 -  | 4  | 2493 | 4.69 |
| LOC_Os08g45070.1 | expressed protein                                                                            | Chr8  | 28293562 | 28293927 + | 1  | 398  | 4.69 |
| LOC_Os01g28690.2 | nucleoporin autopeptidase domain containing protein, expressed                               | Chr1  | 16062021 | 16067662 + | 8  | 2521 | 4.69 |
| LOC_Os01g63830.1 | dehydrodolichyl diphosphate synthase, putative, expressed                                    | Chr1  | 37034026 | 37036018 - | 4  | 1685 | 4.69 |
| LOC_Os01g04710.1 | aspartic proteinase, putative, expressed                                                     | Chr1  | 2120381  | 2122366 +  | 1  | 2018 | 4.69 |
| LOC_Os07g47700.1 | NAD dependent epimerase/dehydratase family domain containing protein, expressed              | Chr7  | 28494715 | 28498126 + | 5  | 2095 | 4.69 |
| LOC_Os01g70720.1 | expressed protein                                                                            | Chr1  | 40937817 | 40941018 - | 3  | 3109 | 4.69 |
| LOC_Os01g70720.2 | expressed protein                                                                            | Chr1  | 40937817 | 40941018 - | 4  | 3029 | 4.69 |

|                  |                                                                                                       |       |          |          |   |    |      |      |
|------------------|-------------------------------------------------------------------------------------------------------|-------|----------|----------|---|----|------|------|
| LOC_Os01g58690.2 | endonuclease/exonuclease/phosphatase family domain containing protein, expressed                      | Chr1  | 33926609 | 33929814 | + | 8  | 1643 | 4.69 |
| LOC_Os02g57280.8 | CBS domain containing membrane protein, putative, expressed                                           | Chr2  | 35092340 | 35094315 | + | 2  | 1923 | 4.69 |
| LOC_Os02g45700.1 | fringe-related protein, putative, expressed                                                           | Chr2  | 27803398 | 27805631 | - | 2  | 2189 | 4.69 |
| LOC_Os07g48810.1 | parvulin-type peptidyl prolyl cis/trans isomerase, putative, expressed                                | Chr7  | 29209556 | 29212778 | + | 8  | 1625 | 4.69 |
| LOC_Os06g42430.2 | expressed protein                                                                                     | Chr6  | 25498385 | 25501058 | + | 3  | 954  | 4.69 |
| LOC_Os06g42430.3 | expressed protein                                                                                     | Chr6  | 25498418 | 25501058 | + | 3  | 947  | 4.69 |
| LOC_Os03g26970.1 | peptidase, T1 family, putative, expressed                                                             | Chr3  | 15420148 | 15424724 | + | 11 | 1650 | 4.69 |
| LOC_Os03g58390.1 | zinc finger, C3HC4 type domain containing protein, expressed                                          | Chr3  | 33267192 | 33272302 | + | 7  | 2004 | 4.69 |
| LOC_Os12g33230.1 | OsFBL60 - F-box domain and LRR containing protein, expressed                                          | Chr12 | 20100274 | 20103255 | + | 3  | 2273 | 4.69 |
| LOC_Os01g42050.1 | DNL zinc finger domain containing protein, putative, expressed                                        | Chr1  | 23840853 | 23843547 | - | 4  | 677  | 4.69 |
| LOC_Os03g03080.1 | expressed protein                                                                                     | Chr3  | 1276308  | 1276989  | + | 2  | 394  | 4.69 |
| LOC_Os11g11770.1 | disease resistance protein RPM1, putative, expressed                                                  | Chr11 | 6532861  | 6535926  | - | 1  | 3098 | 4.69 |
| LOC_Os06g44410.1 | histidine kinase, putative, expressed                                                                 | Chr6  | 26807861 | 26813600 | + | 12 | 3408 | 4.69 |
| LOC_Os03g05225.1 | expressed protein                                                                                     | Chr3  | 2534162  | 2535545  | + | 5  | 829  | 4.70 |
| LOC_Os09g33910.1 | CAMK_CAMK_like.39 - CAMK includes calcium/calmodulin dependent protein kinases, expressed             | Chr9  | 20015571 | 20019391 | - | 8  | 2444 | 4.70 |
| LOC_Os01g05640.1 | receptor-like protein kinase 5 precursor, putative, expressed                                         | Chr1  | 2688623  | 2692186  | - | 3  | 3403 | 4.70 |
| LOC_Os04g18200.1 | dihydrodipicolinate synthase, chloroplast precursor, putative, expressed                              | Chr4  | 10061764 | 10065209 | + | 3  | 1721 | 4.70 |
| LOC_Os10g31930.1 | shugoshin-1, putative, expressed                                                                      | Chr10 | 16766843 | 16769298 | + | 8  | 1970 | 4.70 |
| LOC_Os02g58490.1 | PINHEAD, putative, expressed                                                                          | Chr2  | 35761133 | 35768407 | - | 23 | 4383 | 4.70 |
| LOC_Os09g36976.1 | trafficking protein particle complex subunit, putative, expressed                                     | Chr9  | 21330727 | 21332728 | - | 5  | 904  | 4.70 |
| LOC_Os06g37070.1 | expressed protein                                                                                     | Chr6  | 21883125 | 21884995 | + | 3  | 325  | 4.70 |
| LOC_Os10g03600.2 | OsFBX343 - F-box domain containing protein, expressed                                                 | Chr10 | 1556748  | 1560612  | + | 3  | 2119 | 4.70 |
| LOC_Os10g20230.2 | expressed protein                                                                                     | Chr10 | 10162871 | 10165035 | + | 1  | 2197 | 4.70 |
| LOC_Os04g59380.1 | ZOS4-14 - C2H2 zinc finger protein, expressed                                                         | Chr4  | 35297598 | 35300349 | + | 2  | 1954 | 4.70 |
| LOC_Os12g13295.1 | expressed protein                                                                                     | Chr12 | 7409322  | 7411885  | + | 4  | 1680 | 4.70 |
| LOC_Os05g43820.1 | ras-related protein, putative, expressed                                                              | Chr5  | 25474799 | 25477027 | + | 8  | 1407 | 4.70 |
| LOC_Os01g62750.1 | expressed protein                                                                                     | Chr1  | 36325683 | 36336561 | - | 13 | 1839 | 4.70 |
| LOC_Os07g09890.1 | hexokinase, putative, expressed                                                                       | Chr7  | 5256320  | 5259795  | + | 9  | 2291 | 4.71 |
| LOC_Os07g41580.1 | histone-like transcription factor and archaeal histone, putative, expressed                           | Chr7  | 24921007 | 24921998 | - | 1  | 1024 | 4.71 |
| LOC_Os09g07614.1 | expressed protein                                                                                     | Chr9  | 3826022  | 3827027  | - | 2  | 969  | 4.71 |
| LOC_Os03g34280.1 | expressed protein                                                                                     | Chr3  | 19511670 | 19515607 | + | 3  | 1137 | 4.71 |
| LOC_Os10g37630.1 | UBX domain-containing protein, putative, expressed                                                    | Chr10 | 20135405 | 20139758 | - | 4  | 1897 | 4.71 |
| LOC_Os02g10600.1 | OsFBA1 - F-box and FBA domain containing protein, expressed                                           | Chr2  | 5573182  | 5578016  | + | 2  | 3590 | 4.71 |
| LOC_Os08g06630.3 | RNA polymerase sigma factor, putative, expressed                                                      | Chr8  | 3732515  | 3734637  | + | 4  | 1659 | 4.71 |
| LOC_Os05g49170.1 | cold acclimation protein WCOR413, putative, expressed                                                 | Chr5  | 28213808 | 28216045 | - | 6  | 1272 | 4.71 |
| LOC_Os07g12520.1 | zinc ion binding protein, putative, expressed                                                         | Chr7  | 7145539  | 7149827  | + | 6  | 3098 | 4.71 |
| LOC_Os03g50210.1 | DUF292 domain containing protein, expressed                                                           | Chr3  | 28631644 | 28633378 | + | 3  | 1604 | 4.71 |
| LOC_Os08g37130.1 | oxidoreductase, short chain dehydrogenase/reductase family domain containing protein, expressed       | Chr8  | 23463933 | 23468392 | + | 5  | 1608 | 4.71 |
| LOC_Os01g58690.1 | endonuclease/exonuclease/phosphatase family domain containing protein, expressed                      | Chr1  | 33926601 | 33929805 | + | 8  | 1646 | 4.71 |
| LOC_Os01g66180.1 | cytochrome c, putative, expressed                                                                     | Chr1  | 38443627 | 38446431 | + | 3  | 803  | 4.71 |
| LOC_Os07g28400.1 | CDGSH iron sulfur domain-containing protein 1, putative, expressed                                    | Chr7  | 16599911 | 16602036 | - | 2  | 875  | 4.71 |
| LOC_Os06g05870.1 | dual specificity protein phosphatase, putative, expressed                                             | Chr6  | 2685192  | 2688219  | + | 6  | 1070 | 4.72 |
| LOC_Os03g55950.1 | H-BTB1 - Bric-a-Brac, Tramtrack, Broad Complex BTB domain with H family conserved sequence, expressed | Chr3  | 31853932 | 31857938 | + | 5  | 2574 | 4.72 |
| LOC_Os03g55950.4 | H-BTB1 - Bric-a-Brac, Tramtrack, Broad Complex BTB domain with H family conserved sequence, expressed | Chr3  | 31853872 | 31857850 | + | 5  | 2506 | 4.72 |
| LOC_Os05g22894.1 | expressed protein                                                                                     | Chr5  | 13006264 | 13010183 | + | 4  | 2418 | 4.72 |

|                  |                                                                                              |       |          |            |    |      |      |
|------------------|----------------------------------------------------------------------------------------------|-------|----------|------------|----|------|------|
| LOC_Os12g19090.1 | metalloprotease ATP23, putative, expressed                                                   | Chr12 | 11081124 | 11083634 - | 5  | 1171 | 4.72 |
| LOC_Os02g32110.1 | exostosin family domain containing protein, expressed                                        | Chr2  | 18972815 | 18976369 - | 4  | 1901 | 4.72 |
| LOC_Os05g07280.1 | expressed protein                                                                            | Chr5  | 3856578  | 3859257 -  | 1  | 2712 | 4.72 |
| LOC_Os03g58520.1 | green ripe-like, putative, expressed                                                         | Chr3  | 33325003 | 33327288 + | 3  | 1243 | 4.72 |
| LOC_Os02g19804.1 | Zinc finger C-x8-C-x5-C-x3-H type domain containing protein, expressed                       | Chr2  | 11578489 | 11583591 + | 2  | 1574 | 4.73 |
| LOC_Os02g18840.1 | phosphatidylinositol 3- and 4-kinase family protein, putative, expressed                     | Chr2  | 10994203 | 10997638 - | 5  | 2852 | 4.73 |
| LOC_Os11g20490.1 | expressed protein                                                                            | Chr11 | 11870410 | 11873501 - | 4  | 431  | 4.73 |
| LOC_Os01g53630.1 | ulp1 protease family protein, putative, expressed                                            | Chr1  | 30788730 | 30796556 - | 12 | 2344 | 4.73 |
| LOC_Os08g09950.1 | acyl-desaturase, chloroplast precursor, putative, expressed                                  | Chr8  | 5751669  | 5753747 -  | 2  | 1837 | 4.73 |
| LOC_Os03g57580.3 | expressed protein                                                                            | Chr3  | 32829131 | 32832506 - | 4  | 1971 | 4.73 |
| LOC_Os08g16030.1 | expressed protein                                                                            | Chr8  | 9780201  | 9781984 +  | 2  | 953  | 4.73 |
| LOC_Os04g23849.1 | expressed protein                                                                            | Chr4  | 13618723 | 13625051 - | 5  | 1178 | 4.73 |
| LOC_Os03g06990.1 | oxidoreductase, putative, expressed                                                          | Chr3  | 3566777  | 3568821 +  | 7  | 1058 | 4.73 |
| LOC_Os08g43360.3 | RNA recognition motif containing protein, putative, expressed                                | Chr8  | 27397948 | 27402221 + | 7  | 2621 | 4.73 |
| LOC_Os01g69030.1 | sucrose-phosphate synthase, putative, expressed                                              | Chr1  | 40101404 | 40107116 - | 13 | 4155 | 4.73 |
| LOC_Os01g69030.3 | sucrose-phosphate synthase, putative, expressed                                              | Chr1  | 40101404 | 40107104 - | 12 | 4185 | 4.73 |
| LOC_Os01g69030.4 | sucrose-phosphate synthase, putative, expressed                                              | Chr1  | 40101404 | 40107186 - | 13 | 4187 | 4.73 |
| LOC_Os01g69030.2 | sucrose-phosphate synthase, putative, expressed                                              | Chr1  | 40101404 | 40107186 - | 13 | 4221 | 4.73 |
| LOC_Os06g20410.1 | BAH domain containing protein, expressed                                                     | Chr6  | 11725804 | 11734594 - | 6  | 2919 | 4.73 |
| LOC_Os01g53190.1 | expressed protein                                                                            | Chr1  | 30555330 | 30557784 + | 5  | 682  | 4.73 |
| LOC_Os07g42490.1 | sucrose synthase, putative, expressed                                                        | Chr7  | 25429639 | 25435182 + | 16 | 3332 | 4.73 |
| LOC_Os07g42490.2 | sucrose synthase, putative, expressed                                                        | Chr7  | 25429639 | 25435177 + | 16 | 3468 | 4.73 |
| LOC_Os10g03669.2 | expressed protein                                                                            | Chr10 | 1642417  | 1644857 -  | 5  | 2070 | 4.74 |
| LOC_Os03g60910.1 | PPR repeat domain containing protein, putative, expressed                                    | Chr3  | 34609761 | 34614454 - | 5  | 3622 | 4.74 |
| LOC_Os05g43470.1 | outer membrane protein, OMP85 family, putative, expressed                                    | Chr5  | 25267900 | 25272219 - | 11 | 2129 | 4.74 |
| LOC_Os05g32350.1 | zinc finger, C3HC4 type domain containing protein, expressed                                 | Chr5  | 18862637 | 18867284 + | 6  | 2505 | 4.74 |
| LOC_Os08g25280.1 | pentatricopeptide, putative, expressed                                                       | Chr8  | 15354219 | 15357294 + | 1  | 3108 | 4.74 |
| LOC_Os04g40190.1 | circumsporozoite protein, putative, expressed                                                | Chr4  | 23915728 | 23917015 - | 1  | 1320 | 4.74 |
| LOC_Os01g66890.1 | BTBZ1 - Bric-a-Brac, Tramtrack, and Broad Complex BTB domain with TAZ zinc finger and Calmod | Chr1  | 38843725 | 38846536 + | 6  | 1732 | 4.74 |
| LOC_Os04g54820.2 | programmed cell death 2 C-terminal domain-containing protein, putative, expressed            | Chr4  | 32600309 | 32603388 + | 6  | 2225 | 4.74 |
| LOC_Os12g38620.3 | bromodomain associated family protein, expressed                                             | Chr12 | 23725985 | 23729784 - | 3  | 2240 | 4.74 |
| LOC_Os02g07900.1 | ANTH/ENTH domain containing protein, putative, expressed                                     | Chr2  | 4135897  | 4140415 -  | 15 | 2587 | 4.74 |
| LOC_Os02g42350.2 | nitrilase, putative, expressed                                                               | Chr2  | 25465734 | 25468567 + | 3  | 1005 | 4.75 |
| LOC_Os03g07110.1 | calmodulin-binding protein, putative, expressed                                              | Chr3  | 3630773  | 3635525 -  | 11 | 3286 | 4.75 |
| LOC_Os01g07100.1 | expressed protein                                                                            | Chr1  | 3336408  | 3342886 +  | 11 | 1339 | 4.75 |
| LOC_Os07g19550.1 | expressed protein                                                                            | Chr7  | 11585100 | 11585594 - | 2  | 382  | 4.75 |
| LOC_Os03g62950.1 | expressed protein                                                                            | Chr3  | 35606522 | 35607866 - | 2  | 1247 | 4.75 |
| LOC_Os06g30250.1 | expressed protein                                                                            | Chr6  | 17454251 | 17455479 + | 1  | 1261 | 4.75 |
| LOC_Os05g08110.1 | early light-induced protein, chloroplast precursor, putative, expressed                      | Chr5  | 4415782  | 4416721 -  | 1  | 972  | 4.75 |
| LOC_Os03g42230.1 | B3 DNA binding domain containing protein, expressed                                          | Chr3  | 23491995 | 23496324 + | 7  | 2908 | 4.75 |
| LOC_Os06g08140.1 | protein phosphatase 2C, putative, expressed                                                  | Chr6  | 3947926  | 3952251 -  | 4  | 1875 | 4.75 |
| LOC_Os01g54380.1 | PPR repeat domain containing protein, putative, expressed                                    | Chr1  | 31286182 | 31288094 - | 1  | 1945 | 4.75 |
| LOC_Os11g02270.1 | expressed protein                                                                            | Chr11 | 646980   | 649082 +   | 2  | 1704 | 4.75 |
| LOC_Os01g34190.1 | G-patch domain containing protein, expressed                                                 | Chr1  | 18847970 | 18851815 + | 3  | 1627 | 4.75 |
| LOC_Os03g58610.1 | expressed protein                                                                            | Chr3  | 33384953 | 33387239 - | 2  | 2124 | 4.75 |

|                  |                                                                                       |       |          |            |    |      |      |
|------------------|---------------------------------------------------------------------------------------|-------|----------|------------|----|------|------|
| LOC_Os12g42250.1 | ZOS12-10 - C2H2 zinc finger protein, expressed                                        | Chr12 | 26210779 | 26211896 - | 1  | 1150 | 4.75 |
| LOC_Os04g02910.1 | membrane related protein CP5, putative, expressed                                     | Chr4  | 1148798  | 1152219 -  | 6  | 2393 | 4.75 |
| LOC_Os01g16040.1 | mitochondrial carrier protein, putative, expressed                                    | Chr1  | 9024897  | 9028876 -  | 10 | 2349 | 4.75 |
| LOC_Os09g07730.1 | expressed protein                                                                     | Chr9  | 3898437  | 3900416 -  | 1  | 2012 | 4.75 |
| LOC_Os06g08790.1 | ORC1 - Putative origin recognition complex subunit 1, expressed                       | Chr6  | 4393376  | 4401129 +  | 17 | 3382 | 4.75 |
| LOC_Os09g36460.1 | zinc RING finger protein, putative, expressed                                         | Chr9  | 21038114 | 21041643 + | 7  | 1602 | 4.76 |
| LOC_Os10g07400.1 | disease resistance RPP13-like protein 1, putative, expressed                          | Chr10 | 3908102  | 3912672 -  | 2  | 4459 | 4.76 |
| LOC_Os01g05080.2 | thylakoid lumenal protein, putative, expressed                                        | Chr1  | 2383530  | 2385638 -  | 5  | 1542 | 4.76 |
| LOC_Os09g25380.1 | kinesin motor protein-related, putative, expressed                                    | Chr9  | 15208405 | 15215467 - | 12 | 2250 | 4.76 |
| LOC_Os02g13170.1 | mitochondrial carrier protein, putative, expressed                                    | Chr2  | 7016805  | 7024341 +  | 15 | 2527 | 4.76 |
| LOC_Os02g56170.1 | inositol-1-monophosphatase, putative, expressed                                       | Chr2  | 34362301 | 34365534 - | 3  | 2415 | 4.76 |
| LOC_Os05g04914.1 | expressed protein                                                                     | Chr5  | 2363742  | 2371823 -  | 5  | 2983 | 4.76 |
| LOC_Os09g30150.2 | AGC_PVPK_like_kin82y.16 - ACG kinases include homologs to PKA, PKG and PKC, expressed | Chr9  | 18340159 | 18343614 + | 3  | 2270 | 4.76 |
| LOC_Os11g40450.1 | retrotransposon protein, putative, Ty1-copia subclass, expressed                      | Chr11 | 24120143 | 24132640 - | 16 | 7853 | 4.76 |
| LOC_Os04g02910.4 | membrane related protein CP5, putative, expressed                                     | Chr4  | 1148798  | 1152219 -  | 5  | 2445 | 4.76 |
| LOC_Os12g38620.1 | bromodomain associated family protein, expressed                                      | Chr12 | 23725967 | 23729784 - | 2  | 2302 | 4.76 |
| LOC_Os09g11510.1 | phosphoglycerate mutase, putative, expressed                                          | Chr9  | 6434549  | 6438925 -  | 5  | 1379 | 4.76 |
| LOC_Os04g54080.1 | serine/threonine-protein kinase receptor precursor, putative, expressed               | Chr4  | 32229075 | 32233640 - | 10 | 2819 | 4.76 |
| LOC_Os07g44200.1 | transcription regulator, putative, expressed                                          | Chr7  | 26412890 | 26414532 + | 2  | 1528 | 4.76 |
| LOC_Os02g05900.1 | ternary complex factor MIP1, putative, expressed                                      | Chr2  | 2928922  | 2932227 +  | 8  | 2166 | 4.76 |
| LOC_Os09g17770.1 | retrotransposon protein, putative, unclassified, expressed                            | Chr9  | 10872551 | 10878008 - | 9  | 1626 | 4.76 |
| LOC_Os09g16780.1 | expressed protein                                                                     | Chr9  | 10260562 | 10262221 - | 7  | 1367 | 4.76 |
| LOC_Os08g43360.2 | RNA recognition motif containing protein, putative, expressed                         | Chr8  | 27397948 | 27402221 + | 6  | 2683 | 4.76 |
| LOC_Os04g35864.1 | DDT domain-containing protein, putative, expressed                                    | Chr4  | 21856902 | 21858308 - | 3  | 864  | 4.76 |
| LOC_Os11g06220.2 | expressed protein                                                                     | Chr11 | 2971164  | 2974447 +  | 1  | 3316 | 4.76 |
| LOC_Os04g46180.2 | AGC_PVPK_like_kin82y.11 - ACG kinases include homologs to PKA, PKG and PKC, expressed | Chr4  | 27353813 | 27357800 + | 4  | 3110 | 4.76 |
| LOC_Os04g46180.1 | AGC_PVPK_like_kin82y.11 - ACG kinases include homologs to PKA, PKG and PKC, expressed | Chr4  | 27353820 | 27357800 + | 4  | 3154 | 4.76 |
| LOC_Os10g34320.1 | ribosomal L18p/L5e family protein, expressed                                          | Chr10 | 18301438 | 18304771 - | 2  | 2306 | 4.76 |
| LOC_Os07g30240.1 | mutS family domain IV containing protein, expressed                                   | Chr7  | 17870625 | 17880163 + | 19 | 2585 | 4.76 |
| LOC_Os11g04440.1 | expressed protein                                                                     | Chr11 | 1849546  | 1853976 -  | 3  | 950  | 4.77 |
| LOC_Os03g45180.1 | expressed protein                                                                     | Chr3  | 25512136 | 25517263 - | 10 | 2420 | 4.77 |
| LOC_Os03g45180.2 | expressed protein                                                                     | Chr3  | 25512212 | 25517280 - | 9  | 2400 | 4.77 |
| LOC_Os12g39790.1 | expressed protein                                                                     | Chr12 | 24569213 | 24573439 + | 7  | 1091 | 4.77 |
| LOC_Os02g30790.1 | SAR DNA-binding protein-like, putative, expressed                                     | Chr2  | 18343563 | 18347106 - | 7  | 1722 | 4.77 |
| LOC_Os01g03840.1 | ZOS1-02 - C2H2 zinc finger protein, expressed                                         | Chr1  | 1625159  | 1626771 +  | 4  | 1117 | 4.77 |
| LOC_Os01g19140.2 | O-sialoglycoprotein endopeptidase, putative, expressed                                | Chr1  | 10816704 | 10818530 - | 6  | 916  | 4.77 |
| LOC_Os05g46380.1 | OsFBX174 - F-box domain containing protein, expressed                                 | Chr5  | 26884955 | 26887331 + | 1  | 2409 | 4.77 |
| LOC_Os11g14010.1 | PHD finger protein, putative, expressed                                               | Chr11 | 7776646  | 7784194 -  | 5  | 1450 | 4.78 |
| LOC_Os11g14010.2 | PHD finger protein, putative, expressed                                               | Chr11 | 7776646  | 7783855 -  | 4  | 1264 | 4.78 |
| LOC_Os03g15810.1 | AAA-type ATPase family protein, putative, expressed                                   | Chr3  | 8720361  | 8728030 -  | 24 | 3777 | 4.78 |
| LOC_Os01g64330.1 | retrotransposon protein, putative, unclassified, expressed                            | Chr1  | 37349392 | 37352086 - | 1  | 2727 | 4.78 |
| LOC_Os08g34050.1 | phosphofructokinase, putative, expressed                                              | Chr8  | 21324969 | 21328749 - | 13 | 2024 | 4.78 |
| LOC_Os01g09750.1 | RNA methyltransferase protein, putative, expressed                                    | Chr1  | 5021088  | 5025720 -  | 10 | 2658 | 4.78 |
| LOC_Os09g32130.1 | expressed protein                                                                     | Chr9  | 19180036 | 19183143 + | 5  | 1438 | 4.78 |
| LOC_Os02g44890.2 | RNA-binding region RNP-1, putative, expressed                                         | Chr2  | 27188019 | 27191898 - | 4  | 1242 | 4.78 |

|                  |                                                                       |       |          |          |   |    |      |      |
|------------------|-----------------------------------------------------------------------|-------|----------|----------|---|----|------|------|
| LOC_Os02g44890.1 | RNA-binding region RNP-1, putative, expressed                         | Chr2  | 27188019 | 27191898 | - | 5  | 1397 | 4.78 |
| LOC_Os08g43360.1 | RNA recognition motif containing protein, putative, expressed         | Chr8  | 27397948 | 27402221 | + | 5  | 3129 | 4.78 |
| LOC_Os09g31490.1 | reductase, putative, expressed                                        | Chr9  | 18994539 | 18998420 | - | 6  | 1537 | 4.78 |
| LOC_Os07g12330.2 | tryptophan/tyrosine permease family protein, putative, expressed      | Chr7  | 6954563  | 6959635  | + | 3  | 2304 | 4.78 |
| LOC_Os01g28744.1 | retrotransposon protein, putative, unclassified, expressed            | Chr1  | 16101903 | 16104780 | - | 4  | 916  | 4.79 |
| LOC_Os06g43140.1 | GA16396-PA, putative, expressed                                       | Chr6  | 25932429 | 25935032 | + | 7  | 1127 | 4.79 |
| LOC_Os01g12400.2 | S-locus lectin protein kinase family protein, putative, expressed     | Chr1  | 6774200  | 6777805  | - | 3  | 2788 | 4.79 |
| LOC_Os11g39568.1 | expressed protein                                                     | Chr11 | 23578838 | 23581592 | + | 6  | 1579 | 4.79 |
| LOC_Os12g37160.2 | expressed protein                                                     | Chr12 | 22783377 | 22785775 | - | 4  | 2069 | 4.79 |
| LOC_Os10g28340.2 | heat stress transcription factor, putative, expressed                 | Chr10 | 14746103 | 14750175 | - | 5  | 2469 | 4.79 |
| LOC_Os08g02680.3 | expressed protein                                                     | Chr8  | 1116925  | 1119641  | - | 2  | 2386 | 4.79 |
| LOC_Os04g44210.3 | expressed protein                                                     | Chr4  | 26168609 | 26173022 | - | 7  | 2446 | 4.79 |
| LOC_Os03g10450.1 | Sua5/YciO/YrdC/YwIc family protein, putative, expressed               | Chr3  | 5321334  | 5323969  | - | 5  | 1402 | 4.79 |
| LOC_Os04g49960.1 | glycosyl transferase, group 1 domain containing protein, expressed    | Chr4  | 29803050 | 29806037 | + | 8  | 1866 | 4.79 |
| LOC_Os12g41962.2 | nucleolar protein NOP5, putative, expressed                           | Chr12 | 26021767 | 26026117 | + | 7  | 2974 | 4.79 |
| LOC_Os04g51166.1 | expressed protein                                                     | Chr4  | 30294784 | 30297419 | - | 5  | 1444 | 4.79 |
| LOC_Os11g09474.1 | OsFBX400 - F-box domain containing protein, expressed                 | Chr11 | 5080262  | 5088495  | - | 10 | 3284 | 4.79 |
| LOC_Os02g10590.1 | peptidyl-prolyl cis-trans isomerase, FKBP-type, putative, expressed   | Chr2  | 5567952  | 5569801  | - | 8  | 1136 | 4.79 |
| LOC_Os12g41962.1 | nucleolar protein NOP5, putative, expressed                           | Chr12 | 26021767 | 26026117 | + | 6  | 3020 | 4.79 |
| LOC_Os04g35540.1 | amino acid permease family protein, putative, expressed               | Chr4  | 21637782 | 21642647 | + | 6  | 2259 | 4.80 |
| LOC_Os04g58590.1 | RNA recognition motif containing protein, putative, expressed         | Chr4  | 34832040 | 34837343 | - | 3  | 3515 | 4.80 |
| LOC_Os02g47010.1 | secretory carrier-associated membrane protein, putative, expressed    | Chr2  | 28696678 | 28700851 | + | 12 | 2123 | 4.80 |
| LOC_Os01g03490.1 | heavy-metal-associated domain-containing protein, putative, expressed | Chr1  | 1404155  | 1407187  | + | 3  | 2525 | 4.80 |
| LOC_Os06g05630.3 | GDSL-like lipase/acylhydrolase, putative, expressed                   | Chr6  | 2546688  | 2549257  | + | 4  | 1987 | 4.80 |
| LOC_Os01g59970.1 | expressed protein                                                     | Chr1  | 34674484 | 34676185 | - | 3  | 928  | 4.80 |
| LOC_Os08g20420.2 | MGD2, putative, expressed                                             | Chr8  | 12266091 | 12268184 | + | 7  | 1572 | 4.80 |
| LOC_Os04g22860.1 | protein phosphatase 1 regulatory subunit 11, putative, expressed      | Chr4  | 12953499 | 12954725 | + | 2  | 910  | 4.80 |
| LOC_Os01g72960.1 | expressed protein                                                     | Chr1  | 42315264 | 42317679 | + | 2  | 856  | 4.80 |
| LOC_Os12g31810.1 | cyclin, putative, expressed                                           | Chr12 | 19138380 | 19143545 | - | 12 | 2459 | 4.80 |
| LOC_Os05g28860.2 | 3%27-5%27 exonuclease, putative, expressed                            | Chr5  | 16918923 | 16923919 | + | 8  | 1983 | 4.80 |
| LOC_Os02g37109.1 | vegetative cell wall protein gp1 precursor, putative, expressed       | Chr2  | 22433562 | 22434731 | + | 1  | 1202 | 4.80 |
| LOC_Os02g37109.2 | vegetative cell wall protein gp1 precursor, putative, expressed       | Chr2  | 22433574 | 22434731 | + | 2  | 1169 | 4.80 |
| LOC_Os05g44570.1 | histidine-containing phosphotransfer protein, putative, expressed     | Chr5  | 25927984 | 25931525 | - | 6  | 1239 | 4.80 |
| LOC_Os12g02550.1 | expressed protein                                                     | Chr12 | 876293   | 877652   | - | 1  | 1392 | 4.80 |
| LOC_Os03g07750.1 | expressed protein                                                     | Chr3  | 3936680  | 3940818  | - | 6  | 2732 | 4.80 |
| LOC_Os03g21270.3 | expressed protein                                                     | Chr3  | 12151051 | 12157603 | - | 5  | 2562 | 4.80 |
| LOC_Os11g38990.3 | peptidyl-prolyl cis-trans isomerase, putative, expressed              | Chr11 | 23212467 | 23216933 | + | 8  | 2136 | 4.80 |
| LOC_Os07g38110.1 | tic20, putative, expressed                                            | Chr7  | 22851356 | 22853917 | - | 3  | 1395 | 4.81 |
| LOC_Os02g03420.1 | pentatricopeptide repeat-containing protein, putative, expressed      | Chr2  | 1394865  | 1397141  | + | 1  | 2309 | 4.81 |
| LOC_Os12g34320.1 | S-locus-like receptor protein kinase, putative, expressed             | Chr12 | 20801349 | 20805537 | + | 3  | 3211 | 4.81 |
| LOC_Os06g40860.1 | pentatricopeptide, putative, expressed                                | Chr6  | 24369835 | 24372848 | - | 2  | 2490 | 4.81 |
| LOC_Os11g40420.1 | expressed protein                                                     | Chr11 | 24096099 | 24100831 | - | 7  | 3027 | 4.81 |
| LOC_Os09g33555.1 | expressed protein                                                     | Chr9  | 19788719 | 19789621 | + | 2  | 810  | 4.81 |
| LOC_Os10g03669.1 | expressed protein                                                     | Chr10 | 1642335  | 1646902  | - | 5  | 4197 | 4.81 |
| LOC_Os03g09060.1 | prenyltransferase, putative, expressed                                | Chr3  | 4697225  | 4700186  | - | 10 | 2199 | 4.81 |

|                  |                                                                                                |       |          |            |    |      |      |
|------------------|------------------------------------------------------------------------------------------------|-------|----------|------------|----|------|------|
| LOC_Os04g56730.1 | repressor of RNA polymerase III transcription MAF1, putative, expressed                        | Chr4  | 33828929 | 33832541 - | 11 | 1633 | 4.81 |
| LOC_Os01g10020.1 | ectonucleotide pyrophosphatase/phosphodiesterase family member 1, putative, expressed          | Chr1  | 5218542  | 5220398 +  | 1  | 1889 | 4.81 |
| LOC_Os10g10400.1 | expressed protein                                                                              | Chr10 | 5714332  | 5716013 -  | 3  | 459  | 4.81 |
| LOC_Os09g23720.1 | expressed protein                                                                              | Chr9  | 14095779 | 14099966 + | 9  | 1904 | 4.81 |
| LOC_Os01g68010.5 | TBC domain containing protein, expressed                                                       | Chr1  | 39539150 | 39541096 - | 3  | 1425 | 4.81 |
| LOC_Os01g12830.2 | erythronate-4-phosphate dehydrogenase domain containing protein, expressed                     | Chr1  | 7100982  | 7103266 -  | 2  | 1475 | 4.81 |
| LOC_Os10g35370.1 | oxidoreductase, short chain dehydrogenase/reductase family domain containing family, expressed | Chr10 | 18900290 | 18904022 + | 4  | 1893 | 4.81 |
| LOC_Os02g55570.1 | shugoshin-1, putative, expressed                                                               | Chr2  | 34030829 | 34034442 - | 16 | 2485 | 4.81 |
| LOC_Os11g32490.1 | expressed protein                                                                              | Chr11 | 19175149 | 19179728 - | 15 | 2390 | 4.81 |
| LOC_Os12g42060.3 | OsWAK128b - OsWAK receptor-like protein kinase, expressed                                      | Chr12 | 26087069 | 26088874 + | 2  | 1248 | 4.81 |
| LOC_Os06g40590.1 | expressed protein                                                                              | Chr6  | 24198169 | 24206081 - | 14 | 3515 | 4.81 |
| LOC_Os04g40190.2 | circumsporozoite protein, putative, expressed                                                  | Chr4  | 23915728 | 23917010 - | 2  | 1238 | 4.82 |
| LOC_Os02g57370.1 | DHHC zinc finger domain containing protein, expressed                                          | Chr2  | 35155661 | 35158722 + | 7  | 1510 | 4.82 |
| LOC_Os05g05330.1 | expressed protein                                                                              | Chr5  | 2625971  | 2630241 -  | 11 | 1987 | 4.82 |
| LOC_Os03g50430.1 | zinc finger family protein, putative, expressed                                                | Chr3  | 28774588 | 28777248 + | 6  | 1952 | 4.82 |
| LOC_Os03g11990.3 | bolA, putative, expressed                                                                      | Chr3  | 6282856  | 6284385 +  | 2  | 811  | 4.82 |
| LOC_Os03g11990.1 | bolA, putative, expressed                                                                      | Chr3  | 6282854  | 6284385 +  | 2  | 819  | 4.82 |
| LOC_Os11g02090.1 | expressed protein                                                                              | Chr11 | 566237   | 568625 +   | 4  | 1057 | 4.82 |
| LOC_Os11g02090.2 | expressed protein                                                                              | Chr11 | 566237   | 568625 +   | 4  | 1076 | 4.82 |
| LOC_Os01g36610.1 | expressed protein                                                                              | Chr1  | 20314316 | 20316106 + | 1  | 1823 | 4.82 |
| LOC_Os07g07070.1 | anthranilate phosphoribosyltransferase, putative, expressed                                    | Chr7  | 3485498  | 3489389 -  | 1  | 3924 | 4.82 |
| LOC_Os04g56730.3 | repressor of RNA polymerase III transcription MAF1, putative, expressed                        | Chr4  | 33828929 | 33832541 - | 11 | 1656 | 4.82 |
| LOC_Os11g09110.1 | receptor-like protein kinase 5 precursor, putative, expressed                                  | Chr11 | 4851055  | 4852938 -  | 1  | 1916 | 4.82 |
| LOC_Os02g43480.1 | expressed protein                                                                              | Chr2  | 26243664 | 26246240 - | 6  | 1431 | 4.82 |
| LOC_Os09g32860.1 | OsFBX335 - F-box domain containing protein, expressed                                          | Chr9  | 19589542 | 19592781 + | 6  | 1683 | 4.82 |
| LOC_Os09g32860.2 | OsFBX335 - F-box domain containing protein, expressed                                          | Chr9  | 19589542 | 19592781 + | 6  | 1692 | 4.82 |
| LOC_Os05g05530.2 | expressed protein                                                                              | Chr5  | 2748324  | 2749973 -  | 3  | 1080 | 4.82 |
| LOC_Os03g19780.1 | expressed protein                                                                              | Chr3  | 11133135 | 11134225 + | 1  | 1123 | 4.82 |
| LOC_Os02g38386.1 | NBS-LRR disease resistance protein, putative, expressed                                        | Chr2  | 23209694 | 23210456 + | 1  | 795  | 4.82 |
| LOC_Os07g45210.1 | expressed protein                                                                              | Chr7  | 26984201 | 26988333 + | 8  | 1677 | 4.82 |
| LOC_Os04g40050.1 | ribonuclease H2 subunit B, putative, expressed                                                 | Chr4  | 23843544 | 23847934 + | 10 | 1721 | 4.82 |
| LOC_Os04g33330.2 | expressed protein                                                                              | Chr4  | 20186829 | 20189403 - | 2  | 2052 | 4.82 |
| LOC_Os07g41660.1 | expressed protein                                                                              | Chr7  | 24965965 | 24968299 - | 3  | 801  | 4.82 |
| LOC_Os01g73060.1 | expressed protein                                                                              | Chr1  | 42388274 | 42390062 - | 2  | 1414 | 4.82 |
| LOC_Os02g51810.1 | expressed protein                                                                              | Chr2  | 31739493 | 31747386 + | 13 | 2698 | 4.82 |
| LOC_Os08g34160.1 | CAF1 family ribonuclease containing protein, putative, expressed                               | Chr8  | 21411152 | 21416150 + | 7  | 1877 | 4.83 |
| LOC_Os04g40980.1 | Divergent PAP2 family domain containing protein, expressed                                     | Chr4  | 24321375 | 24325746 + | 5  | 1270 | 4.83 |
| LOC_Os12g29760.2 | oxidoreductase, aldo/keto reductase family protein, putative, expressed                        | Chr12 | 17788672 | 17791111 - | 5  | 1491 | 4.83 |
| LOC_Os12g29760.1 | oxidoreductase, aldo/keto reductase family protein, putative, expressed                        | Chr12 | 17788672 | 17791111 - | 5  | 1502 | 4.83 |
| LOC_Os02g39880.1 | expressed protein                                                                              | Chr2  | 24095854 | 24097712 + | 2  | 772  | 4.83 |
| LOC_Os02g14520.1 | transposon protein, putative, CACTA, En/Spm sub-class, expressed                               | Chr2  | 7998422  | 8001879 -  | 5  | 3100 | 4.83 |
| LOC_Os01g50820.1 | transporter, major facilitator family, putative, expressed                                     | Chr1  | 29188850 | 29190965 + | 1  | 2148 | 4.83 |
| LOC_Os01g53294.1 | respiratory burst oxidase protein B, putative, expressed                                       | Chr1  | 30622671 | 30634405 + | 14 | 3230 | 4.83 |
| LOC_Os12g04720.1 | expressed protein                                                                              | Chr12 | 2010205  | 2011804 -  | 2  | 1265 | 4.84 |
| LOC_Os12g04720.2 | expressed protein                                                                              | Chr12 | 2010205  | 2011804 -  | 2  | 1479 | 4.84 |

|                  |                                                                                    |       |          |            |    |      |      |
|------------------|------------------------------------------------------------------------------------|-------|----------|------------|----|------|------|
| LOC_Os06g08750.1 | integral membrane transporter family protein, putative, expressed                  | Chr6  | 4379795  | 4383418 -  | 5  | 2473 | 4.84 |
| LOC_Os02g42960.1 | thylakoid luminal protein, putative, expressed                                     | Chr2  | 25855532 | 25859143 + | 6  | 1498 | 4.84 |
| LOC_Os08g40850.1 | mitochondrial carrier protein, putative, expressed                                 | Chr8  | 25848628 | 25853121 - | 5  | 1878 | 4.84 |
| LOC_Os07g15430.1 | expressed protein                                                                  | Chr7  | 8926122  | 8928964 +  | 2  | 1898 | 4.84 |
| LOC_Os01g07880.1 | transcription factor HY5, putative, expressed                                      | Chr1  | 3811149  | 3812069 -  | 3  | 849  | 4.84 |
| LOC_Os03g27320.4 | steroid binding protein, putative, expressed                                       | Chr3  | 15648901 | 15651034 + | 5  | 1197 | 4.84 |
| LOC_Os03g07110.3 | calmodulin-binding protein, putative, expressed                                    | Chr3  | 3631135  | 3635525 -  | 10 | 2694 | 4.84 |
| LOC_Os11g32500.1 | rubredoxin family protein, putative, expressed                                     | Chr11 | 19180541 | 19182360 - | 4  | 1162 | 4.84 |
| LOC_Os02g05610.1 | ZOS2-03 - C2H2 zinc finger protein, expressed                                      | Chr2  | 2728848  | 2734454 +  | 12 | 2903 | 4.84 |
| LOC_Os01g67520.1 | VTC2, putative, expressed                                                          | Chr1  | 39244417 | 39247128 + | 7  | 2039 | 4.84 |
| LOC_Os01g67520.3 | VTC2, putative, expressed                                                          | Chr1  | 39244417 | 39247128 + | 6  | 2124 | 4.84 |
| LOC_Os08g32130.2 | heat shock protein DnaJ, putative, expressed                                       | Chr8  | 19937056 | 19940521 + | 5  | 1749 | 4.84 |
| LOC_Os02g06754.1 | expressed protein                                                                  | Chr2  | 3408024  | 3409076 +  | 3  | 919  | 4.84 |
| LOC_Os05g43820.3 | ras-related protein, putative, expressed                                           | Chr5  | 25474799 | 25477947 + | 9  | 1405 | 4.84 |
| LOC_Os06g13100.3 | CREG1 precursor, putative, expressed                                               | Chr6  | 7189601  | 7191441 -  | 3  | 904  | 4.84 |
| LOC_Os02g07110.1 | OsSAUR6 - Auxin-responsive SAUR gene family member, expressed                      | Chr2  | 3655348  | 3656185 +  | 1  | 870  | 4.85 |
| LOC_Os03g60350.1 | leaf senescence related protein, putative, expressed                               | Chr3  | 34320193 | 34325381 - | 6  | 2544 | 4.85 |
| LOC_Os08g28200.1 | expressed protein                                                                  | Chr8  | 17211715 | 17213207 + | 3  | 931  | 4.85 |
| LOC_Os08g39694.2 | cytochrome P450, putative, expressed                                               | Chr8  | 25131585 | 25134371 + | 1  | 2819 | 4.85 |
| LOC_Os02g50240.2 | glutamine synthetase, catalytic domain containing protein, expressed               | Chr2  | 30674776 | 30677476 - | 9  | 1741 | 4.85 |
| LOC_Os01g55690.1 | glutelin, putative, expressed                                                      | Chr1  | 32076732 | 32078743 + | 4  | 1865 | 4.85 |
| LOC_Os11g36679.1 | zinc knuckle domain containing protein, expressed                                  | Chr11 | 21654011 | 21657690 + | 9  | 1619 | 4.85 |
| LOC_Os01g65580.2 | mitotic checkpoint family protein, putative, expressed                             | Chr1  | 38064439 | 38071692 + | 18 | 3198 | 4.85 |
| LOC_Os02g50240.1 | glutamine synthetase, catalytic domain containing protein, expressed               | Chr2  | 30674776 | 30678659 - | 11 | 2096 | 4.85 |
| LOC_Os05g07764.2 | carboxyl-terminal proteinase, putative, expressed                                  | Chr5  | 4179894  | 4185986 -  | 8  | 2313 | 4.85 |
| LOC_Os05g22930.1 | CAAX amino terminal protease family protein, putative, expressed                   | Chr5  | 13057100 | 13060306 - | 8  | 1474 | 4.85 |
| LOC_Os05g24000.1 | expressed protein                                                                  | Chr5  | 13823200 | 13828651 - | 7  | 1548 | 4.85 |
| LOC_Os05g24000.2 | expressed protein                                                                  | Chr5  | 13823207 | 13828651 - | 7  | 1538 | 4.85 |
| LOC_Os07g09690.1 | galactosyltransferase family protein, putative, expressed                          | Chr7  | 5151366  | 5155561 -  | 7  | 2956 | 4.85 |
| LOC_Os05g50654.1 | mitochondrial import receptor subunit TOM7-1, putative, expressed                  | Chr5  | 29035416 | 29036227 + | 1  | 844  | 4.85 |
| LOC_Os07g35335.1 | expressed protein                                                                  | Chr7  | 21144789 | 21145980 - | 1  | 1224 | 4.85 |
| LOC_Os01g40420.2 | CBS domain containing membrane protein, putative, expressed                        | Chr1  | 22820220 | 22823182 - | 4  | 2760 | 4.85 |
| LOC_Os07g11850.1 | transposon protein, putative, CACTA, En/Spm sub-class                              | Chr7  | 6554301  | 6556876 +  | 6  | 963  | 4.85 |
| LOC_Os03g45770.2 | expressed protein                                                                  | Chr3  | 25850658 | 25858176 - | 13 | 3280 | 4.85 |
| LOC_Os03g45770.1 | expressed protein                                                                  | Chr3  | 25850658 | 25858176 - | 14 | 3204 | 4.85 |
| LOC_Os01g65580.1 | mitotic checkpoint family protein, putative, expressed                             | Chr1  | 38064439 | 38071692 + | 16 | 3319 | 4.86 |
| LOC_Os01g33420.1 | glycosyl hydrolase family protein 27, putative, expressed                          | Chr1  | 18394242 | 18401699 - | 14 | 2748 | 4.86 |
| LOC_Os01g62210.2 | 50S ribosomal protein L17, putative, expressed                                     | Chr1  | 36007366 | 36008846 + | 4  | 550  | 4.86 |
| LOC_Os03g55050.1 | UDP-glucuronosyl and UDP-glucosyl transferase domain containing protein, expressed | Chr3  | 31302708 | 31305227 + | 2  | 2486 | 4.86 |
| LOC_Os05g50410.1 | Rad21 / Rec8 like protein, putative, expressed                                     | Chr5  | 28889622 | 28896919 + | 20 | 2776 | 4.86 |
| LOC_Os01g55500.1 | nucleobase-ascorbate transporter, putative, expressed                              | Chr1  | 31975992 | 31980079 + | 14 | 2611 | 4.86 |
| LOC_Os01g55500.2 | nucleobase-ascorbate transporter, putative, expressed                              | Chr1  | 31975992 | 31980079 + | 13 | 2674 | 4.86 |
| LOC_Os01g55500.3 | nucleobase-ascorbate transporter, putative, expressed                              | Chr1  | 31975992 | 31980079 + | 13 | 2677 | 4.86 |
| LOC_Os06g05250.2 | GTP-binding protein GUF1, putative, expressed                                      | Chr6  | 2367069  | 2372121 -  | 11 | 2553 | 4.86 |
| LOC_Os12g12170.1 | cytochrome b5-like Heme/Steroid binding domain containing protein, expressed       | Chr12 | 6677657  | 6679930 +  | 3  | 1199 | 4.86 |

|                  |                                                                                    |       |          |            |    |      |      |
|------------------|------------------------------------------------------------------------------------|-------|----------|------------|----|------|------|
| LOC_Os12g12170.2 | cytochrome b5-like Heme/Steroid binding domain containing protein, expressed       | Chr12 | 6677657  | 6679930 +  | 4  | 1129 | 4.86 |
| LOC_Os02g57150.1 | tubulin-specific chaperone A, putative, expressed                                  | Chr2  | 35002742 | 35004795 + | 4  | 823  | 4.86 |
| LOC_Os04g46460.1 | amino acid kinase, putative, expressed                                             | Chr4  | 27563230 | 27566584 + | 2  | 1883 | 4.86 |
| LOC_Os02g45110.1 | MT-A70 domain containing protein, expressed                                        | Chr2  | 27360417 | 27365800 + | 7  | 2773 | 4.86 |
| LOC_Os12g01916.1 | double-stranded RNA binding motif containing protein, expressed                    | Chr12 | 535869   | 540349 -   | 4  | 1968 | 4.86 |
| LOC_Os09g27060.1 | SNF2 family N-terminal domain containing protein, expressed                        | Chr9  | 16461604 | 16467627 - | 15 | 3567 | 4.86 |
| LOC_Os01g65580.3 | mitotic checkpoint family protein, putative, expressed                             | Chr1  | 38064439 | 38071696 + | 17 | 3262 | 4.86 |
| LOC_Os01g67520.2 | VTC2, putative, expressed                                                          | Chr1  | 39244417 | 39247231 + | 5  | 2601 | 4.86 |
| LOC_Os06g06410.2 | rRNA-processing protein FCF, putative, expressed                                   | Chr6  | 2992045  | 2995594 -  | 9  | 1508 | 4.86 |
| LOC_Os01g01040.4 | expressed protein                                                                  | Chr1  | 16292    | 18304 +    | 3  | 1620 | 4.86 |
| LOC_Os06g08670.1 | glutathione peroxidase, putative, expressed                                        | Chr6  | 4321607  | 4325283 +  | 6  | 1433 | 4.86 |
| LOC_Os03g55570.1 | upstream activation factor subunit spp27, putative, expressed                      | Chr3  | 31622869 | 31630121 + | 6  | 1598 | 4.86 |
| LOC_Os07g40460.2 | prefoldin, putative, expressed                                                     | Chr7  | 24244101 | 24245440 + | 3  | 725  | 4.87 |
| LOC_Os03g07270.1 | glycine-rich cell wall protein, putative, expressed                                | Chr3  | 3707180  | 3708517 +  | 1  | 1370 | 4.87 |
| LOC_Os05g18750.1 | ribosomal protein L25, putative, expressed                                         | Chr5  | 10865366 | 10869233 + | 3  | 1117 | 4.87 |
| LOC_Os07g44299.1 | pentatricopeptide, putative, expressed                                             | Chr7  | 26468910 | 26470733 - | 1  | 1856 | 4.87 |
| LOC_Os02g43920.1 | cell division cycle protein 23, putative, expressed                                | Chr2  | 26511108 | 26515845 + | 4  | 3179 | 4.87 |
| LOC_Os11g34650.1 | expressed protein                                                                  | Chr11 | 20278037 | 20281449 - | 5  | 679  | 4.87 |
| LOC_Os03g55380.1 | oxidoreductase, putative, expressed                                                | Chr3  | 31503703 | 31507753 + | 8  | 1672 | 4.87 |
| LOC_Os07g45210.2 | expressed protein                                                                  | Chr7  | 26984185 | 26988352 + | 6  | 2514 | 4.87 |
| LOC_Os06g09170.1 | zinc ion binding protein, putative, expressed                                      | Chr6  | 4612249  | 4615892 +  | 6  | 2038 | 4.87 |
| LOC_Os05g07764.1 | carboxyl-terminal proteinase, putative, expressed                                  | Chr5  | 4179894  | 4185777 -  | 7  | 2185 | 4.87 |
| LOC_Os02g43710.1 | enoyl-CoA hydratase/isomerase family protein, putative, expressed                  | Chr2  | 26381932 | 26385683 + | 8  | 1309 | 4.87 |
| LOC_Os06g22380.1 | expressed protein                                                                  | Chr6  | 12990974 | 13000940 - | 11 | 3013 | 4.87 |
| LOC_Os05g05480.1 | OsDegp6 - Putative Deg protease homologue, expressed                               | Chr5  | 2725695  | 2733753 +  | 21 | 2997 | 4.87 |
| LOC_Os05g28950.1 | CAAX amino terminal protease family protein, putative, expressed                   | Chr5  | 16972939 | 16975972 + | 8  | 1676 | 4.87 |
| LOC_Os06g01400.1 | glycyl-tRNA synthetase 2, chloroplast/mitochondrial precursor, putative, expressed | Chr6  | 233787   | 244624 +   | 34 | 4595 | 4.87 |
| LOC_Os08g07960.1 | mitotic checkpoint protein, putative, expressed                                    | Chr8  | 4496679  | 4502242 -  | 12 | 2140 | 4.87 |
| LOC_Os08g07960.2 | mitotic checkpoint protein, putative, expressed                                    | Chr8  | 4496679  | 4502242 -  | 12 | 2134 | 4.87 |
| LOC_Os10g31910.1 | pectate lyase precursor, putative, expressed                                       | Chr10 | 16755564 | 16760878 - | 4  | 1915 | 4.87 |
| LOC_Os05g27100.1 | expressed protein                                                                  | Chr5  | 15770497 | 15773664 - | 3  | 1051 | 4.87 |
| LOC_Os08g28030.1 | retrotransposon protein, putative, Ty1-copia subclass, expressed                   | Chr8  | 17074831 | 17077208 - | 1  | 2410 | 4.87 |
| LOC_Os12g42044.2 | OsWAK127b - OsWAK short gene, expressed                                            | Chr12 | 26081667 | 26086831 - | 5  | 2465 | 4.87 |
| LOC_Os12g42044.3 | OsWAK127b - OsWAK short gene, expressed                                            | Chr12 | 26081703 | 26086841 - | 5  | 2439 | 4.87 |
| LOC_Os01g70160.1 | zinc finger, C3HC4 type domain containing protein, expressed                       | Chr1  | 40607531 | 40610341 + | 5  | 1303 | 4.87 |
| LOC_Os02g16670.1 | ATP-binding domain-containing protein, putative, expressed                         | Chr2  | 9523632  | 9531798 +  | 11 | 2455 | 4.87 |
| LOC_Os02g13310.1 | homeobox domain containing protein, expressed                                      | Chr2  | 7096950  | 7100609 +  | 5  | 2728 | 4.87 |
| LOC_Os08g37390.1 | cyclin, putative, expressed                                                        | Chr8  | 23648009 | 23651153 + | 6  | 2151 | 4.88 |
| LOC_Os03g10650.1 | cyclin, putative, expressed                                                        | Chr3  | 5441739  | 5444255 -  | 5  | 2212 | 4.88 |
| LOC_Os02g24134.2 | Sec1 family transport protein, putative, expressed                                 | Chr2  | 13977609 | 13987430 - | 13 | 2797 | 4.88 |
| LOC_Os02g24134.1 | Sec1 family transport protein, putative, expressed                                 | Chr2  | 13977609 | 13987430 - | 13 | 2732 | 4.88 |
| LOC_Os05g05480.2 | OsDegp6 - Putative Deg protease homologue, expressed                               | Chr5  | 2725695  | 2733731 +  | 21 | 2979 | 4.88 |
| LOC_Os10g40740.1 | helix-loop-helix DNA-binding domain containing protein, expressed                  | Chr10 | 21863008 | 21867667 - | 5  | 2098 | 4.88 |
| LOC_Os04g39950.1 | expressed protein                                                                  | Chr4  | 23785508 | 23787991 - | 2  | 2259 | 4.88 |
| LOC_Os04g44830.1 | thioredoxin, putative, expressed                                                   | Chr4  | 26540458 | 26542966 - | 2  | 1039 | 4.88 |



|                  |                                                                                       |       |          |            |    |      |      |
|------------------|---------------------------------------------------------------------------------------|-------|----------|------------|----|------|------|
| LOC_Os08g39960.2 | 3-oxoacyl-reductase, chloroplast precursor, putative, expressed                       | Chr8  | 25319022 | 25320721 - | 4  | 1042 | 4.88 |
| LOC_Os01g41870.1 | protein kinase, putative, expressed                                                   | Chr1  | 23727761 | 23733080 + | 10 | 3213 | 4.88 |
| LOC_Os06g04610.1 | ribosome-binding factor A, chloroplast precursor, putative, expressed                 | Chr6  | 2009996  | 2015659 +  | 6  | 4197 | 4.88 |
| LOC_Os03g02450.1 | pyridoxamine 5%27-phosphate oxidase family protein, putative, expressed               | Chr3  | 878838   | 881507 +   | 8  | 1466 | 4.88 |
| LOC_Os02g58080.1 | transporter, major facilitator family, putative, expressed                            | Chr2  | 35548813 | 35553460 + | 14 | 2867 | 4.88 |
| LOC_Os12g05000.1 | expressed protein                                                                     | Chr12 | 2171592  | 2174960 +  | 7  | 1362 | 4.88 |
| LOC_Os03g08370.1 | transposon protein, putative, unclassified, expressed                                 | Chr3  | 4272870  | 4277474 +  | 5  | 3269 | 4.88 |
| LOC_Os09g30105.1 | expressed protein                                                                     | Chr9  | 18301264 | 18304037 - | 6  | 1143 | 4.88 |
| LOC_Os03g27780.1 | protein phosphatase protein, putative, expressed                                      | Chr3  | 15932524 | 15936871 + | 9  | 2810 | 4.88 |
| LOC_Os12g09280.2 | RNA polymerase subunit, putative, expressed                                           | Chr12 | 4860192  | 4861931 -  | 3  | 646  | 4.88 |
| LOC_Os12g09280.1 | RNA polymerase subunit, putative, expressed                                           | Chr12 | 4860236  | 4863168 -  | 4  | 825  | 4.88 |
| LOC_Os10g02980.1 | formin, putative, expressed                                                           | Chr10 | 1234067  | 1241772 +  | 15 | 2284 | 4.88 |
| LOC_Os03g63910.1 | PPR repeat domain containing protein, putative, expressed                             | Chr3  | 36107251 | 36110942 + | 3  | 2889 | 4.89 |
| LOC_Os04g56720.1 | RCC2, putative, expressed                                                             | Chr4  | 33822411 | 33828795 + | 16 | 2727 | 4.89 |
| LOC_Os07g02250.1 | expressed protein                                                                     | Chr7  | 722836   | 726496 -   | 3  | 1002 | 4.89 |
| LOC_Os11g11780.1 | cysteine-rich receptor-like protein kinase 21 precursor, putative, expressed          | Chr11 | 6539074  | 6541690 +  | 7  | 1487 | 4.89 |
| LOC_Os03g64050.1 | receptor protein kinase, putative, expressed                                          | Chr3  | 36189259 | 36190656 + | 1  | 1430 | 4.89 |
| LOC_Os12g32374.1 | histone deacetylase 6, putative, expressed                                            | Chr12 | 19531927 | 19534814 - | 4  | 909  | 4.89 |
| LOC_Os01g05080.1 | thylakoid lumenal protein, putative, expressed                                        | Chr1  | 2383530  | 2385638 -  | 6  | 1191 | 4.89 |
| LOC_Os06g49185.1 | expressed protein                                                                     | Chr6  | 29802051 | 29803832 - | 1  | 1814 | 4.89 |
| LOC_Os05g45340.1 | ATP binding protein, putative, expressed                                              | Chr5  | 26300407 | 26305695 + | 6  | 3431 | 4.89 |
| LOC_Os07g46430.2 | expressed protein                                                                     | Chr7  | 27701512 | 27705190 - | 8  | 1698 | 4.89 |
| LOC_Os02g56354.1 | transposon protein, putative, unclassified, expressed                                 | Chr2  | 34492560 | 34498117 - | 5  | 2038 | 4.90 |
| LOC_Os01g17050.1 | VQ domain containing protein, putative, expressed                                     | Chr1  | 9770015  | 9771037 -  | 1  | 1055 | 4.90 |
| LOC_Os10g37640.1 | HIT zinc finger domain containing protein, expressed                                  | Chr10 | 20140647 | 20144863 - | 5  | 1761 | 4.90 |
| LOC_Os10g37640.2 | HIT zinc finger domain containing protein, expressed                                  | Chr10 | 20140647 | 20144863 - | 4  | 1806 | 4.90 |
| LOC_Os02g15970.3 | alpha-hemolysin, putative, expressed                                                  | Chr2  | 9053964  | 9056393 -  | 5  | 723  | 4.90 |
| LOC_Os07g35004.1 | TKL_IRAK_DUF26-la.4 - DUF26 kinases have homology to DUF26 containing loci, expressed | Chr7  | 20969981 | 20975950 + | 7  | 2548 | 4.90 |
| LOC_Os02g06400.1 | growth regulator related protein, putative, expressed                                 | Chr2  | 3197141  | 3203168 +  | 11 | 2446 | 4.90 |
| LOC_Os01g41870.2 | protein kinase, putative, expressed                                                   | Chr1  | 23728942 | 23733077 + | 9  | 2979 | 4.90 |
| LOC_Os11g10330.1 | OsFBX416 - F-box domain containing protein, expressed                                 | Chr11 | 5611244  | 5615084 -  | 5  | 1984 | 4.90 |
| LOC_Os03g14030.1 | thaumatin, putative, expressed                                                        | Chr3  | 7610990  | 7614083 -  | 3  | 2279 | 4.90 |
| LOC_Os06g06410.1 | rRNA-processing protein FCF, putative, expressed                                      | Chr6  | 2992046  | 2995594 -  | 8  | 1574 | 4.90 |
| LOC_Os04g59330.1 | expressed protein                                                                     | Chr4  | 35277603 | 35279154 + | 2  | 1529 | 4.90 |
| LOC_Os10g43050.1 | OsClp11 - Putative Clp protease homologue, expressed                                  | Chr10 | 23190115 | 23192319 + | 2  | 1354 | 4.90 |
| LOC_Os02g46910.2 | glycosyl hydrolases family 16, putative, expressed                                    | Chr2  | 28621982 | 28624673 + | 3  | 2553 | 4.90 |
| LOC_Os12g40450.1 | biotin--protein ligase, putative, expressed                                           | Chr12 | 25029774 | 25032330 - | 4  | 1789 | 4.90 |
| LOC_Os10g20250.1 | membrane associated DUF588 domain containing protein, putative, expressed             | Chr10 | 10174522 | 10177326 - | 3  | 1239 | 4.90 |
| LOC_Os04g37720.1 | pentatricopeptide, putative, expressed                                                | Chr4  | 22432173 | 22434744 + | 2  | 1490 | 4.90 |
| LOC_Os07g39390.1 | retrotransposon protein, putative, unclassified, expressed                            | Chr7  | 23596302 | 23598324 - | 1  | 2055 | 4.90 |
| LOC_Os01g45900.1 | OsFBX20 - F-box domain containing protein, expressed                                  | Chr1  | 26075030 | 26077134 + | 2  | 2008 | 4.90 |
| LOC_Os01g50622.4 | DNA-binding protein DSP1, putative, expressed                                         | Chr1  | 29072766 | 29076344 - | 10 | 1895 | 4.90 |
| LOC_Os01g50622.1 | DNA-binding protein DSP1, putative, expressed                                         | Chr1  | 29072766 | 29076344 - | 11 | 1726 | 4.90 |
| LOC_Os03g52640.2 | expressed protein                                                                     | Chr3  | 30188190 | 30191568 - | 9  | 1770 | 4.91 |
| LOC_Os03g52640.1 | expressed protein                                                                     | Chr3  | 30188188 | 30191568 - | 9  | 1785 | 4.91 |

|                  |                                                                                                |       |          |            |    |      |      |
|------------------|------------------------------------------------------------------------------------------------|-------|----------|------------|----|------|------|
| LOC_Os10g37600.1 | expressed protein                                                                              | Chr10 | 20114942 | 20116804 + | 1  | 1895 | 4.91 |
| LOC_Os01g70920.4 | cullin-1, putative, expressed                                                                  | Chr1  | 41052348 | 41053949 + | 3  | 634  | 4.91 |
| LOC_Os01g66940.1 | kinase, pfkB family, putative, expressed                                                       | Chr1  | 38884741 | 38887723 - | 4  | 1921 | 4.91 |
| LOC_Os09g28000.1 | OsSigP6 - Putative Type I Signal Peptidase homologue%3B employs a putative Ser/Lys catalytic d | Chr9  | 17003030 | 17005694 - | 6  | 2067 | 4.91 |
| LOC_Os02g04230.3 | CGMC_MAPKCMGC_2.7 - CGMC includes CDA, MAPK, GSK3, and CLKC kinases, expressed                 | Chr2  | 1850954  | 1858237 -  | 11 | 2373 | 4.91 |
| LOC_Os08g30980.1 | expressed protein                                                                              | Chr8  | 19124432 | 19127727 + | 5  | 913  | 4.91 |
| LOC_Os03g48190.2 | expressed protein                                                                              | Chr3  | 27431824 | 27436602 - | 3  | 1777 | 4.91 |
| LOC_Os05g50410.2 | Rad21 / Rec8 like protein, putative, expressed                                                 | Chr5  | 28889622 | 28896998 + | 21 | 3021 | 4.91 |
| LOC_Os08g38010.3 | expressed protein                                                                              | Chr8  | 24079623 | 24082996 + | 4  | 2276 | 4.91 |
| LOC_Os10g42760.1 | PPR repeat domain containing protein, putative, expressed                                      | Chr10 | 23069756 | 23071683 - | 1  | 1960 | 4.91 |
| LOC_Os05g28950.3 | CAAX amino terminal protease family protein, putative, expressed                               | Chr5  | 16972939 | 16975972 + | 8  | 1753 | 4.91 |
| LOC_Os05g41750.1 | RecF/RecN/SMC N terminal domain containing protein, expressed                                  | Chr5  | 24423072 | 24426490 + | 13 | 2221 | 4.91 |
| LOC_Os06g18830.1 | AGC_PVPK_like_kin82y.13 - ACG kinases include homologs to PKA, PKG and PKC, expressed          | Chr6  | 10690487 | 10694167 - | 3  | 2515 | 4.91 |
| LOC_Os01g52710.1 | glycosyl transferase 8 domain containing protein, putative, expressed                          | Chr1  | 30311221 | 30315924 + | 6  | 2686 | 4.91 |
| LOC_Os01g50622.2 | DNA-binding protein DSP1, putative, expressed                                                  | Chr1  | 29072766 | 29076344 - | 11 | 1752 | 4.91 |
| LOC_Os09g28690.1 | gibberellin receptor GID1L2, putative, expressed                                               | Chr9  | 17447933 | 17449592 - | 1  | 1692 | 4.91 |
| LOC_Os10g35370.2 | oxidoreductase, short chain dehydrogenase/reductase family domain containing family, expressed | Chr10 | 18900302 | 18904022 + | 3  | 3047 | 4.91 |
| LOC_Os03g51880.1 | GA15368-PA, putative, expressed                                                                | Chr3  | 29745634 | 29747861 - | 3  | 1450 | 4.91 |
| LOC_Os08g43540.1 | peptidase, T1 family, putative, expressed                                                      | Chr8  | 27533250 | 27537106 + | 3  | 1597 | 4.92 |
| LOC_Os12g35640.1 | OsAPRL6 adenosine 5%27-phosphosulfate reductase-like OsAPRL6, expressed                        | Chr12 | 21666234 | 21669379 - | 4  | 1571 | 4.92 |
| LOC_Os03g58890.1 | oxidoreductase, putative, expressed                                                            | Chr3  | 33522519 | 33524525 - | 7  | 1386 | 4.92 |
| LOC_Os03g58890.2 | oxidoreductase, putative, expressed                                                            | Chr3  | 33522519 | 33524525 - | 7  | 1392 | 4.92 |
| LOC_Os12g17830.1 | expressed protein                                                                              | Chr12 | 10208671 | 10211169 - | 4  | 1032 | 4.92 |
| LOC_Os05g50490.3 | X8 domain containing protein, expressed                                                        | Chr5  | 28950837 | 28952754 - | 4  | 1377 | 4.92 |
| LOC_Os05g50490.1 | X8 domain containing protein, expressed                                                        | Chr5  | 28950838 | 28952754 - | 4  | 1343 | 4.92 |
| LOC_Os05g50490.2 | X8 domain containing protein, expressed                                                        | Chr5  | 28950837 | 28952754 - | 4  | 1338 | 4.92 |
| LOC_Os08g31130.1 | integral membrane protein DUF6 containing protein, expressed                                   | Chr8  | 19222064 | 19227521 - | 7  | 1617 | 4.92 |
| LOC_Os02g35840.1 | expressed protein                                                                              | Chr2  | 21529602 | 21532808 - | 2  | 1884 | 4.92 |
| LOC_Os07g46430.1 | expressed protein                                                                              | Chr7  | 27701580 | 27705190 - | 7  | 1674 | 4.92 |
| LOC_Os02g10950.1 | expressed protein                                                                              | Chr2  | 5816586  | 5819181 -  | 2  | 915  | 4.92 |
| LOC_Os05g34160.1 | mTERF domain containing protein, expressed                                                     | Chr5  | 20196728 | 20198598 + | 1  | 1903 | 4.92 |
| LOC_Os11g04490.1 | astaxanthin synthase KC28, putative, expressed                                                 | Chr11 | 1879360  | 1881945 +  | 9  | 1359 | 4.92 |
| LOC_Os03g27780.2 | protein phosphatase protein, putative, expressed                                               | Chr3  | 15932524 | 15936871 + | 8  | 2862 | 4.92 |
| LOC_Os03g07110.2 | calmodulin-binding protein, putative, expressed                                                | Chr3  | 3631135  | 3635525 -  | 11 | 2776 | 4.92 |
| LOC_Os10g03600.1 | OsFBX343 - F-box domain containing protein, expressed                                          | Chr10 | 1556748  | 1559927 +  | 2  | 1844 | 4.92 |
| LOC_Os02g26940.1 | vegetative storage protein, putative, expressed                                                | Chr2  | 15821478 | 15825977 - | 3  | 3477 | 4.93 |
| LOC_Os02g04230.2 | CGMC_MAPKCMGC_2.7 - CGMC includes CDA, MAPK, GSK3, and CLKC kinases, expressed                 | Chr2  | 1850954  | 1855166 -  | 11 | 2356 | 4.93 |
| LOC_Os03g53390.1 | expressed protein                                                                              | Chr3  | 30632873 | 30636506 + | 5  | 1234 | 4.93 |
| LOC_Os03g12050.1 | expressed protein                                                                              | Chr3  | 6321973  | 6324032 -  | 1  | 2092 | 4.93 |
| LOC_Os01g69220.1 | exostosin family domain containing protein, expressed                                          | Chr1  | 40230199 | 40233220 + | 4  | 2097 | 4.93 |
| LOC_Os11g23880.4 | expressed protein                                                                              | Chr11 | 13521325 | 13526265 + | 6  | 1766 | 4.93 |
| LOC_Os09g32940.4 | expressed protein                                                                              | Chr9  | 19630609 | 19632137 + | 4  | 1224 | 4.93 |
| LOC_Os10g35760.1 | pentatricopeptide, putative, expressed                                                         | Chr10 | 19112196 | 19114289 + | 2  | 2070 | 4.93 |
| LOC_Os10g34730.1 | GEM, putative, expressed                                                                       | Chr10 | 18545043 | 18546241 - | 4  | 1009 | 4.93 |
| LOC_Os11g23880.2 | expressed protein                                                                              | Chr11 | 13521342 | 13526257 + | 6  | 1761 | 4.93 |

|                  |                                                                                           |       |          |            |    |      |      |
|------------------|-------------------------------------------------------------------------------------------|-------|----------|------------|----|------|------|
| LOC_Os12g16680.1 | expressed protein                                                                         | Chr12 | 9555641  | 9557963 +  | 6  | 567  | 4.93 |
| LOC_Os04g49590.1 | regulatory protein, putative, expressed                                                   | Chr4  | 29577953 | 29581134 - | 4  | 1911 | 4.93 |
| LOC_Os02g25230.1 | expressed protein                                                                         | Chr2  | 14680969 | 14684808 + | 1  | 3872 | 4.93 |
| LOC_Os03g60890.1 | calmodulin binding protein, putative, expressed                                           | Chr3  | 34602552 | 34605732 - | 7  | 2050 | 4.93 |
| LOC_Os02g10380.1 | Regulator of chromosome condensation domain containing protein, expressed                 | Chr2  | 5465521  | 5468118 -  | 4  | 1465 | 4.93 |
| LOC_Os01g29680.1 | retrotransposon protein, putative, Ty1-copia subclass, expressed                          | Chr1  | 16630029 | 16632800 - | 4  | 2045 | 4.93 |
| LOC_Os12g13174.1 | expressed protein                                                                         | Chr12 | 7340876  | 7344834 -  | 1  | 3991 | 4.93 |
| LOC_Os04g41530.1 | serine/threonine-protein kinase GCN2, putative, expressed                                 | Chr4  | 24631230 | 24635840 + | 12 | 1695 | 4.93 |
| LOC_Os04g31950.1 | LSM domain containing protein, expressed                                                  | Chr4  | 19134251 | 19139588 - | 3  | 772  | 4.93 |
| LOC_Os06g51400.1 | expressed protein                                                                         | Chr6  | 31132833 | 31136056 + | 6  | 1698 | 4.93 |
| LOC_Os03g48920.1 | DUF1517 domain containing protein, putative, expressed                                    | Chr3  | 27854761 | 27858506 + | 6  | 1636 | 4.93 |
| LOC_Os01g50622.3 | DNA-binding protein DSP1, putative, expressed                                             | Chr1  | 29072766 | 29076344 - | 10 | 1808 | 4.93 |
| LOC_Os05g39840.1 | expressed protein                                                                         | Chr5  | 23416415 | 23419341 + | 2  | 2138 | 4.94 |
| LOC_Os07g33350.2 | hsp20/alpha crystallin family protein, putative, expressed                                | Chr7  | 19935493 | 19936422 + | 2  | 909  | 4.94 |
| LOC_Os07g33350.1 | hsp20/alpha crystallin family protein, putative, expressed                                | Chr7  | 19935493 | 19936423 + | 1  | 963  | 4.94 |
| LOC_Os07g32340.3 | retrotransposon protein, putative, unclassified, expressed                                | Chr7  | 19223928 | 19230480 + | 6  | 3110 | 4.94 |
| LOC_Os07g32340.1 | retrotransposon protein, putative, unclassified, expressed                                | Chr7  | 19223928 | 19230480 + | 6  | 3071 | 4.94 |
| LOC_Os07g32340.2 | retrotransposon protein, putative, unclassified, expressed                                | Chr7  | 19223928 | 19230480 + | 6  | 3067 | 4.94 |
| LOC_Os05g20954.4 | retrotransposon protein, putative, unclassified, expressed                                | Chr5  | 12324846 | 12327690 + | 3  | 686  | 4.94 |
| LOC_Os02g18450.1 | GTP-binding protein typA/bipA, putative, expressed                                        | Chr2  | 10739451 | 10747502 + | 14 | 3316 | 4.94 |
| LOC_Os01g66230.2 | csAtPR5, putative, expressed                                                              | Chr1  | 38469633 | 38475218 - | 6  | 3275 | 4.94 |
| LOC_Os07g08880.4 | ES43 protein, putative, expressed                                                         | Chr7  | 4606679  | 4609665 +  | 2  | 764  | 4.94 |
| LOC_Os10g36710.1 | CAMK_CAMK_like.40 - CAMK includes calcium/calmodulin dependent protein kinases, expressed | Chr10 | 19640792 | 19645948 + | 11 | 2435 | 4.94 |
| LOC_Os05g15720.1 | expressed protein                                                                         | Chr5  | 8879120  | 8886570 +  | 13 | 4057 | 4.94 |
| LOC_Os12g29500.1 | expressed protein                                                                         | Chr12 | 17537308 | 17539450 - | 4  | 773  | 4.94 |
| LOC_Os01g10250.1 | hydrolase, alpha/beta fold family domain containing protein, expressed                    | Chr1  | 5389733  | 5394414 -  | 7  | 1814 | 4.94 |
| LOC_Os07g36760.1 | retrotransposon protein, putative, Ty3-gypsy subclass, expressed                          | Chr7  | 22024801 | 22027091 - | 3  | 1116 | 4.94 |
| LOC_Os02g02120.1 | OsWAK11 - OsWAK receptor-like protein kinase, expressed                                   | Chr2  | 627342   | 630655 -   | 3  | 2954 | 4.94 |
| LOC_Os04g39130.1 | expressed protein                                                                         | Chr4  | 23272614 | 23275363 + | 4  | 1400 | 4.94 |
| LOC_Os01g71300.3 | S-formylglutathione hydrolase, putative, expressed                                        | Chr1  | 41251226 | 41268578 + | 4  | 1218 | 4.94 |
| LOC_Os08g02680.2 | expressed protein                                                                         | Chr8  | 1116925  | 1119641 -  | 2  | 1144 | 4.94 |
| LOC_Os04g52820.1 | expressed protein                                                                         | Chr4  | 31448546 | 31452514 + | 9  | 1143 | 4.94 |
| LOC_Os06g47830.1 | RPA2C - Putative single-stranded DNA binding complex subunit 2, expressed                 | Chr6  | 28946879 | 28950601 - | 10 | 2002 | 4.94 |
| LOC_Os02g26960.1 | expressed protein                                                                         | Chr2  | 15829250 | 15833220 - | 2  | 1346 | 4.95 |
| LOC_Os08g45140.1 | OsGrx_S12 - glutaredoxin subgroup I, expressed                                            | Chr8  | 28343297 | 28345543 + | 5  | 976  | 4.95 |
| LOC_Os09g10840.2 | transcription factor, putative, expressed                                                 | Chr9  | 5918077  | 5929775 +  | 11 | 2445 | 4.95 |
| LOC_Os09g10840.1 | transcription factor, putative, expressed                                                 | Chr9  | 5918077  | 5929775 +  | 11 | 2421 | 4.95 |
| LOC_Os02g21660.2 | L1P family of ribosomal proteins domain containing protein, expressed                     | Chr2  | 12869461 | 12872471 + | 5  | 1338 | 4.95 |
| LOC_Os02g21660.1 | L1P family of ribosomal proteins domain containing protein, expressed                     | Chr2  | 12869461 | 12872472 + | 6  | 1264 | 4.95 |
| LOC_Os02g07840.2 | bZIP transcription factor domain containing protein, expressed                            | Chr2  | 4109810  | 4112884 +  | 6  | 1545 | 4.95 |
| LOC_Os02g07840.1 | bZIP transcription factor domain containing protein, expressed                            | Chr2  | 4109770  | 4112884 +  | 6  | 1588 | 4.95 |
| LOC_Os07g48520.3 | gamete-specific hydroxyproline-rich glycoprotein a2, putative, expressed                  | Chr7  | 29024590 | 29029437 + | 3  | 3602 | 4.95 |
| LOC_Os03g07340.1 | ribosomal L18p/L5e family protein, putative, expressed                                    | Chr3  | 3727762  | 3729070 -  | 3  | 1015 | 4.95 |
| LOC_Os12g02970.1 | RNA binding protein, putative, expressed                                                  | Chr12 | 1098580  | 1101299 -  | 7  | 1667 | 4.95 |
| LOC_Os10g03750.1 | OsFBX349 - F-box domain containing protein, expressed                                     | Chr10 | 1694920  | 1697854 -  | 4  | 2014 | 4.95 |

|                  |                                                                                                 |       |          |            |    |      |      |
|------------------|-------------------------------------------------------------------------------------------------|-------|----------|------------|----|------|------|
| LOC_Os02g21660.3 | L1P family of ribosomal proteins domain containing protein, expressed                           | Chr2  | 12869461 | 12872471 + | 5  | 1638 | 4.95 |
| LOC_Os07g41310.1 | COBRA, putative, expressed                                                                      | Chr7  | 24751588 | 24755397 + | 6  | 2180 | 4.95 |
| LOC_Os11g02620.1 | BTBN21 - Bric-a-Brac, Tramtrack, Broad Complex BTB domain with non-phototropic hypocotyl 3      | Chr11 | 827666   | 831854 -   | 4  | 2137 | 4.95 |
| LOC_Os01g55310.1 | haloacid dehalogenase-like hydrolase domain-containing protein 1A, putative, expressed          | Chr1  | 31836495 | 31839636 - | 9  | 1293 | 4.95 |
| LOC_Os05g19270.1 | MSH-like DNA mismatch repair protein, putative, expressed                                       | Chr5  | 11189415 | 11198075 + | 13 | 3807 | 4.95 |
| LOC_Os04g47660.1 | retrotransposon protein, putative, unclassified, expressed                                      | Chr4  | 28280837 | 28282961 + | 2  | 1354 | 4.95 |
| LOC_Os09g23250.1 | expressed protein                                                                               | Chr9  | 13798351 | 13801104 + | 6  | 1185 | 4.95 |
| LOC_Os02g58620.1 | pentatricopeptide, putative, expressed                                                          | Chr2  | 35822996 | 35829631 + | 11 | 3851 | 4.95 |
| LOC_Os01g59060.1 | 50S ribosomal protein, putative, expressed                                                      | Chr1  | 34133777 | 34135646 - | 2  | 820  | 4.95 |
| LOC_Os03g39432.1 | CPuORF31 - conserved peptide uORF-containing transcript, expressed                              | Chr3  | 21910225 | 21913786 + | 3  | 2124 | 4.95 |
| LOC_Os08g38890.1 | expressed protein                                                                               | Chr8  | 24581314 | 24583718 - | 2  | 1829 | 4.96 |
| LOC_Os04g22870.1 | rpp14 family protein, expressed                                                                 | Chr4  | 12955765 | 12959917 - | 4  | 1316 | 4.96 |
| LOC_Os12g05750.1 | eukaryotic aspartyl protease domain containing protein, expressed                               | Chr12 | 2650651  | 2651769 -  | 1  | 1151 | 4.96 |
| LOC_Os05g44610.1 | expressed protein                                                                               | Chr5  | 25952719 | 25955835 + | 1  | 3149 | 4.96 |
| LOC_Os07g30250.1 | RFT1, putative, expressed                                                                       | Chr7  | 17881007 | 17887821 - | 12 | 3590 | 4.96 |
| LOC_Os02g47230.1 | Disease resistance/zinc finger/chromosome condensation-like region protein, putative, expressed | Chr2  | 28826708 | 28833632 - | 7  | 2354 | 4.96 |
| LOC_Os02g47230.2 | Disease resistance/zinc finger/chromosome condensation-like region protein, putative, expressed | Chr2  | 28826708 | 28833632 - | 7  | 2498 | 4.96 |
| LOC_Os06g38680.1 | expressed protein                                                                               | Chr6  | 22967816 | 22971851 - | 2  | 3959 | 4.96 |
| LOC_Os05g05580.1 | expressed protein                                                                               | Chr5  | 2767332  | 2775704 -  | 16 | 2491 | 4.96 |
| LOC_Os01g62070.1 | cation efflux family protein, putative, expressed                                               | Chr1  | 35917401 | 35921969 - | 6  | 1968 | 4.96 |
| LOC_Os02g44360.1 | scarecrow transcription factor family protein, putative, expressed                              | Chr2  | 26841585 | 26844331 + | 1  | 2779 | 4.96 |
| LOC_Os09g28000.2 | OsSigP6 - Putative Type I Signal Peptidase homologue%3B employs a putative Ser/Lys catalytic d  | Chr9  | 17003030 | 17005694 - | 5  | 2150 | 4.96 |
| LOC_Os01g27520.2 | tRNA synthetases class II domain containing protein, expressed                                  | Chr1  | 15356779 | 15360684 - | 6  | 2288 | 4.96 |
| LOC_Os11g14525.1 | expressed protein                                                                               | Chr11 | 8158799  | 8159473 -  | 1  | 707  | 4.96 |
| LOC_Os07g38620.1 | pyridoxamine 5%27-phosphate oxidase family protein, putative, expressed                         | Chr7  | 23194203 | 23199120 - | 11 | 1921 | 4.97 |
| LOC_Os07g45780.1 | expressed protein                                                                               | Chr7  | 27330316 | 27333500 + | 6  | 2334 | 4.97 |
| LOC_Os03g48170.1 | 5-AMP-activated protein kinase-related, putative, expressed                                     | Chr3  | 27408274 | 27413242 + | 9  | 2355 | 4.97 |
| LOC_Os01g24090.1 | TPR repeat, putative, expressed                                                                 | Chr1  | 13582036 | 13584917 - | 8  | 1488 | 4.97 |
| LOC_Os01g24090.2 | TPR repeat, putative, expressed                                                                 | Chr1  | 13582036 | 13584917 - | 5  | 1701 | 4.97 |
| LOC_Os05g20914.2 | expressed protein                                                                               | Chr5  | 12293920 | 12297797 + | 6  | 1373 | 4.97 |
| LOC_Os03g52130.1 | expressed protein                                                                               | Chr3  | 29931355 | 29932698 + | 3  | 811  | 4.97 |
| LOC_Os03g57569.2 | expressed protein                                                                               | Chr3  | 32824996 | 32828545 - | 2  | 1962 | 4.97 |
| LOC_Os10g39170.1 | peroxidase precursor, putative, expressed                                                       | Chr10 | 20900132 | 20902342 + | 3  | 1530 | 4.97 |
| LOC_Os08g40100.1 | expressed protein                                                                               | Chr8  | 25385363 | 25387275 - | 2  | 849  | 4.97 |
| LOC_Os03g55760.1 | MYB family transcription factor, putative, expressed                                            | Chr3  | 31749469 | 31755282 + | 6  | 1720 | 4.97 |
| LOC_Os01g54210.1 | GATA zinc finger domain containing protein, expressed                                           | Chr1  | 31180196 | 31182456 - | 2  | 1815 | 4.97 |
| LOC_Os03g61580.1 | expressed protein                                                                               | Chr3  | 34918614 | 34922707 + | 6  | 2074 | 4.97 |
| LOC_Os06g27540.1 | retrotransposon protein, putative, unclassified, expressed                                      | Chr6  | 15589924 | 15594920 + | 7  | 3434 | 4.97 |
| LOC_Os01g15970.1 | expressed protein                                                                               | Chr1  | 8986253  | 8987398 +  | 3  | 1015 | 4.97 |
| LOC_Os02g42370.1 | receptor-like protein kinase 2 precursor, putative, expressed                                   | Chr2  | 25488084 | 25491732 + | 3  | 3467 | 4.97 |
| LOC_Os05g01300.1 | expressed protein                                                                               | Chr5  | 195354   | 197342 -   | 2  | 1487 | 4.97 |
| LOC_Os11g43510.1 | lipase precursor, putative, expressed                                                           | Chr11 | 26263726 | 26267156 + | 10 | 1751 | 4.97 |
| LOC_Os12g17830.2 | expressed protein                                                                               | Chr12 | 10208632 | 10211165 - | 3  | 1245 | 4.97 |
| LOC_Os05g20954.3 | retrotransposon protein, putative, unclassified, expressed                                      | Chr5  | 12324846 | 12327690 + | 4  | 903  | 4.97 |
| LOC_Os08g39960.1 | 3-oxoacyl-reductase, chloroplast precursor, putative, expressed                                 | Chr8  | 25319026 | 25320721 - | 3  | 1112 | 4.97 |

|                   |                                                                                |       |          |            |    |      |      |
|-------------------|--------------------------------------------------------------------------------|-------|----------|------------|----|------|------|
| LOC_Os02g03620.1  | seven in absentia protein family domain containing protein, expressed          | Chr2  | 1481233  | 1485113 -  | 4  | 1544 | 4.97 |
| LOC_Os02g38210.1  | elongation factor Tu, putative, expressed                                      | Chr2  | 23111937 | 23113929 + | 1  | 2025 | 4.97 |
| LOC_Os09g19160.1  | serine/threonine-protein kinase, putative, expressed                           | Chr9  | 11449827 | 11458902 + | 11 | 2329 | 4.97 |
| LOC_Os01g48010.1  | expressed protein                                                              | Chr1  | 27482806 | 27486965 + | 2  | 1809 | 4.97 |
| LOC_Os05g38850.1  | MCM8 - Putative minichromosome maintenance MCM family subunit 8, expressed     | Chr5  | 22789273 | 22797554 + | 14 | 2704 | 4.97 |
| LOC_Os03g60200.1  | pentatricopeptide, putative, expressed                                         | Chr3  | 34238474 | 34241647 + | 2  | 3149 | 4.98 |
| LOC_Os12g03540.1  | WD domain, G-beta repeat domain containing protein, expressed                  | Chr12 | 1405136  | 1409433 -  | 15 | 2270 | 4.98 |
| LOC_Os04g40870.1  | alveolar soft part sarcoma chromosome region, candidate 1, putative, expressed | Chr4  | 24253308 | 24257461 + | 8  | 1541 | 4.98 |
| LOC_Os05g10590.2  | expressed protein                                                              | Chr5  | 5763773  | 5767497 +  | 4  | 1254 | 4.98 |
| LOC_Os11g45809.1  | expressed protein                                                              | Chr11 | 27717452 | 27721100 + | 3  | 2843 | 4.98 |
| LOC_Os04g41300.1  | ribosome recycling factor, putative, expressed                                 | Chr4  | 24505544 | 24508402 - | 8  | 1450 | 4.98 |
| LOC_Os05g38460.1  | MYB family transcription factor, putative, expressed                           | Chr5  | 22553303 | 22561067 - | 9  | 2769 | 4.98 |
| LOC_Os06g50860.1  | hydrolase, acting on carbon-nitrogen, putative, expressed                      | Chr6  | 30770702 | 30773820 - | 7  | 2032 | 4.99 |
| LOC_Os06g50860.2  | hydrolase, acting on carbon-nitrogen, putative, expressed                      | Chr6  | 30770702 | 30773813 - | 6  | 2084 | 4.99 |
| LOC_Os03g18830.1  | programmed cell death protein 2, putative, expressed                           | Chr3  | 10551741 | 10556172 - | 11 | 2278 | 4.99 |
| LOC_Os12g37160.1  | expressed protein                                                              | Chr12 | 22783377 | 22785769 - | 4  | 2131 | 4.99 |
| LOC_Os04g56970.2  | tubulin/FtsZ domain containing protein, putative, expressed                    | Chr4  | 33963664 | 33966745 - | 6  | 1921 | 4.99 |
| LOC_Os04g56970.1  | tubulin/FtsZ domain containing protein, putative, expressed                    | Chr4  | 33963664 | 33966744 - | 6  | 1926 | 4.99 |
| LOC_Os03g31310.4  | circadian clock coupling factor-related, putative, expressed                   | Chr3  | 17842767 | 17844363 - | 2  | 1329 | 4.99 |
| LOC_Os08g27824.1  | NOL1/NOP2/sun family protein, putative, expressed                              | Chr8  | 16946485 | 16959993 - | 12 | 2679 | 4.99 |
| LOC_Os02g10090.1  | expressed protein                                                              | Chr2  | 5254080  | 5257596 -  | 6  | 2550 | 4.99 |
| LOC_Os02g10090.2  | expressed protein                                                              | Chr2  | 5254199  | 5257596 -  | 5  | 2501 | 4.99 |
| LOC_Os07g48520.1  | gamete-specific hydroxyproline-rich glycoprotein a2, putative, expressed       | Chr7  | 29024590 | 29029437 + | 3  | 4688 | 4.99 |
| LOC_Os03g48600.8  | domain of unknown function DUF966 domain containing protein, expressed         | Chr3  | 27705346 | 27709641 - | 7  | 2469 | 4.99 |
| LOC_Os03g48600.11 | domain of unknown function DUF966 domain containing protein, expressed         | Chr3  | 27705346 | 27709695 - | 8  | 2474 | 4.99 |
| LOC_Os03g48600.9  | domain of unknown function DUF966 domain containing protein, expressed         | Chr3  | 27705346 | 27709706 - | 8  | 2529 | 4.99 |
| LOC_Os03g48600.5  | domain of unknown function DUF966 domain containing protein, expressed         | Chr3  | 27705346 | 27710498 - | 8  | 2670 | 4.99 |
| LOC_Os08g36170.1  | cytokinesis negative regulator RCP1, putative, expressed                       | Chr8  | 22808465 | 22814436 + | 2  | 1704 | 4.99 |
| LOC_Os05g20954.2  | retrotransposon protein, putative, unclassified, expressed                     | Chr5  | 12324846 | 12327690 + | 4  | 960  | 4.99 |
| LOC_Os01g56890.3  | expressed protein                                                              | Chr1  | 32856951 | 32858097 - | 2  | 1137 | 4.99 |
| LOC_Os02g44550.1  | NADP-dependent malic enzyme, putative, expressed                               | Chr2  | 26988678 | 26993990 - | 7  | 4106 | 4.99 |
| LOC_Os02g53180.2  | 1-aminocyclopropane-1-carboxylate oxidase protein, putative, expressed         | Chr2  | 32558636 | 32562705 + | 3  | 3253 | 4.99 |
| LOC_Os11g04990.2  | expressed protein                                                              | Chr11 | 2145222  | 2146761 +  | 5  | 809  | 4.99 |
| LOC_Os08g39580.1  | zinc knuckle family protein, expressed                                         | Chr8  | 25043265 | 25047377 - | 3  | 3924 | 5.00 |
| LOC_Os11g03530.2  | ELMO/CED-12 family protein, putative, expressed                                | Chr11 | 1360742  | 1364120 +  | 9  | 1585 | 5.00 |
| LOC_Os11g03530.3  | ELMO/CED-12 family protein, putative, expressed                                | Chr11 | 1360723  | 1364120 +  | 12 | 1921 | 5.00 |
| LOC_Os11g03530.1  | ELMO/CED-12 family protein, putative, expressed                                | Chr11 | 1360723  | 1364127 +  | 12 | 1933 | 5.00 |
| LOC_Os02g14890.1  | expressed protein                                                              | Chr2  | 8292472  | 8293263 +  | 1  | 824  | 5.00 |
| LOC_Os07g38110.2  | tic20, putative, expressed                                                     | Chr7  | 22851356 | 22853915 - | 3  | 1422 | 5.00 |
| LOC_Os04g02510.1  | ZOS4-01 - C2H2 zinc finger protein, expressed                                  | Chr4  | 913866   | 917650 +   | 3  | 1828 | 5.00 |
| LOC_Os04g30450.1  | DUF803 domain containing, putative, expressed                                  | Chr4  | 18190661 | 18193887 + | 8  | 1576 | 5.00 |
| LOC_Os04g24430.1  | sucrose synthase, putative, expressed                                          | Chr4  | 14008245 | 14013440 + | 17 | 3388 | 5.00 |
| LOC_Os12g32210.2  | autophagy-related protein 10, putative, expressed                              | Chr12 | 19440718 | 19443701 + | 9  | 1777 | 5.00 |
| LOC_Os02g04230.1  | CGMC_MAPKCMGC_2.7 - CGMC includes CDA, MAPK, GSK3, and CLKC kinases, expressed | Chr2  | 1850954  | 1857067 -  | 11 | 2456 | 5.00 |
| LOC_Os06g09820.1  | cupin superfamily protein, putative, expressed                                 | Chr6  | 5002237  | 5004824 -  | 3  | 1090 | 5.00 |

|                  |                                                                                                |       |          |            |    |      |      |
|------------------|------------------------------------------------------------------------------------------------|-------|----------|------------|----|------|------|
| LOC_Os04g14730.1 | expressed protein                                                                              | Chr4  | 8274727  | 8275182 -  | 1  | 488  | 5.00 |
| LOC_Os12g31790.1 | expressed protein                                                                              | Chr12 | 19126131 | 19129712 - | 3  | 826  | 5.00 |
| LOC_Os11g06880.1 | acyl-CoA synthetase, putative, expressed                                                       | Chr11 | 3374944  | 3377966 +  | 7  | 1767 | 5.00 |
| LOC_Os03g50470.2 | expressed protein                                                                              | Chr3  | 28804844 | 28810296 - | 5  | 1685 | 5.01 |
| LOC_Os01g10250.3 | hydrolase, alpha/beta fold family domain containing protein, expressed                         | Chr1  | 5389733  | 5394414 -  | 5  | 2470 | 5.01 |
| LOC_Os05g48050.1 | ribosomal protein L7/L12 C-terminal domain containing protein, expressed                       | Chr5  | 27546982 | 27548785 - | 2  | 1268 | 5.01 |
| LOC_Os02g49820.1 | RNA recognition motif family protein, expressed                                                | Chr2  | 30444896 | 30448425 + | 9  | 2234 | 5.01 |
| LOC_Os04g32710.1 | 40S ribosomal protein S27, putative, expressed                                                 | Chr4  | 19712823 | 19714034 + | 3  | 234  | 5.01 |
| LOC_Os03g53900.4 | universal stress protein domain containing protein, putative, expressed                        | Chr3  | 30901299 | 30903033 - | 4  | 1574 | 5.01 |
| LOC_Os03g53900.3 | universal stress protein domain containing protein, putative, expressed                        | Chr3  | 30901299 | 30903033 - | 4  | 1577 | 5.01 |
| LOC_Os03g53900.2 | universal stress protein domain containing protein, putative, expressed                        | Chr3  | 30901299 | 30903035 - | 4  | 1585 | 5.01 |
| LOC_Os03g53900.1 | universal stress protein domain containing protein, putative, expressed                        | Chr3  | 30901299 | 30903033 - | 4  | 1586 | 5.01 |
| LOC_Os03g53900.5 | universal stress protein domain containing protein, putative, expressed                        | Chr3  | 30901299 | 30903033 - | 3  | 1662 | 5.01 |
| LOC_Os10g41800.1 | expressed protein                                                                              | Chr10 | 22497865 | 22499262 - | 1  | 1430 | 5.01 |
| LOC_Os01g21610.1 | uncharacterized aarF domain-containing protein kinase 4, putative, expressed                   | Chr1  | 12108869 | 12110717 + | 3  | 1443 | 5.01 |
| LOC_Os05g30250.1 | Os5bglu19 - beta-glucosidase homologue, similar to G. max isohydroxyurate hydrolase, expressed | Chr5  | 17530143 | 17534646 + | 13 | 2673 | 5.01 |
| LOC_Os03g18960.1 | calmodulin binding protein, putative, expressed                                                | Chr3  | 10617883 | 10620525 + | 8  | 1783 | 5.01 |
| LOC_Os11g23880.1 | expressed protein                                                                              | Chr11 | 13521342 | 13526257 + | 5  | 2371 | 5.01 |
| LOC_Os07g38290.1 | plastocyanin-like domain containing protein, putative, expressed                               | Chr7  | 22996769 | 23001763 - | 4  | 1120 | 5.01 |
| LOC_Os06g03820.1 | expressed protein                                                                              | Chr6  | 1530110  | 1531686 +  | 1  | 1609 | 5.01 |
| LOC_Os06g08400.2 | LIM domain-containing protein, putative, expressed                                             | Chr6  | 4093254  | 4100890 +  | 12 | 2890 | 5.01 |
| LOC_Os01g70240.2 | expressed protein                                                                              | Chr1  | 40668623 | 40671873 - | 3  | 843  | 5.01 |
| LOC_Os01g70240.1 | expressed protein                                                                              | Chr1  | 40668623 | 40671874 - | 3  | 847  | 5.01 |
| LOC_Os09g27140.1 | expressed protein                                                                              | Chr9  | 16505340 | 16508819 - | 4  | 1246 | 5.01 |
| LOC_Os07g01710.1 | phytosulfokine receptor precursor, putative, expressed                                         | Chr7  | 424870   | 428523 +   | 1  | 3686 | 5.01 |
| LOC_Os10g42720.1 | acyltransferase, putative, expressed                                                           | Chr10 | 23044693 | 23050740 + | 14 | 2495 | 5.01 |
| LOC_Os01g36020.1 | retrotransposon protein, putative, unclassified, expressed                                     | Chr1  | 19929043 | 19931949 - | 8  | 2314 | 5.01 |
| LOC_Os03g31180.1 | diacylglycerol kinase 1, putative, expressed                                                   | Chr3  | 17754818 | 17761133 + | 8  | 3175 | 5.02 |
| LOC_Os03g30580.1 | expressed protein                                                                              | Chr3  | 17453197 | 17456931 - | 5  | 1820 | 5.02 |
| LOC_Os04g01160.1 | zinc finger family protein, putative, expressed                                                | Chr4  | 121631   | 125374 -   | 2  | 2702 | 5.02 |
| LOC_Os03g42350.1 | ankyrin, putative, expressed                                                                   | Chr3  | 23556180 | 23562967 + | 11 | 2147 | 5.02 |
| LOC_Os10g31940.1 | inosine triphosphate pyrophosphatase, putative, expressed                                      | Chr10 | 16768464 | 16771729 - | 7  | 1695 | 5.02 |
| LOC_Os01g15850.1 | expressed protein                                                                              | Chr1  | 8925072  | 8929646 +  | 7  | 1783 | 5.02 |
| LOC_Os05g27820.1 | patellin protein, putative, expressed                                                          | Chr5  | 16216524 | 16220140 + | 4  | 1788 | 5.02 |
| LOC_Os06g15370.1 | peptide transporter PTR2, putative, expressed                                                  | Chr6  | 8739431  | 8744022 +  | 4  | 2127 | 5.02 |
| LOC_Os04g56760.1 | PHF5-like protein domain containing protein, expressed                                         | Chr4  | 33854398 | 33856555 - | 2  | 953  | 5.02 |
| LOC_Os03g59200.1 | expressed protein                                                                              | Chr3  | 33711473 | 33713619 + | 1  | 2179 | 5.02 |
| LOC_Os09g27900.1 | plastidic glucose transporter 1, putative, expressed                                           | Chr9  | 16963593 | 16965490 + | 6  | 927  | 5.02 |
| LOC_Os02g09530.1 | expressed protein                                                                              | Chr2  | 4908802  | 4910881 -  | 6  | 840  | 5.02 |
| LOC_Os04g57390.1 | acyl-protein thioesterase, putative, expressed                                                 | Chr4  | 34153188 | 34154953 - | 6  | 1148 | 5.02 |
| LOC_Os01g01780.1 | exostosin family protein, putative, expressed                                                  | Chr1  | 412579   | 415830 +   | 7  | 2308 | 5.03 |
| LOC_Os10g34790.1 | terpene synthase, putative, expressed                                                          | Chr10 | 18573539 | 18575856 - | 4  | 1369 | 5.03 |
| LOC_Os03g48600.6 | domain of unknown function DUF966 domain containing protein, expressed                         | Chr3  | 27705346 | 27709776 - | 8  | 2599 | 5.03 |
| LOC_Os08g08592.1 | expressed protein                                                                              | Chr8  | 4971046  | 4973854 -  | 5  | 2385 | 5.03 |
| LOC_Os08g08592.2 | expressed protein                                                                              | Chr8  | 4971046  | 4973854 -  | 5  | 2389 | 5.03 |

|                  |                                                                                               |       |          |            |    |      |      |
|------------------|-----------------------------------------------------------------------------------------------|-------|----------|------------|----|------|------|
| LOC_Os08g08592.3 | expressed protein                                                                             | Chr8  | 4971046  | 4973854 -  | 4  | 2450 | 5.03 |
| LOC_Os04g22720.1 | expressed protein                                                                             | Chr4  | 12875227 | 12882818 + | 9  | 2128 | 5.03 |
| LOC_Os10g41400.2 | peptide methionine sulfoxide reductase, putative, expressed                                   | Chr10 | 22254774 | 22256429 + | 1  | 1688 | 5.03 |
| LOC_Os02g48680.1 | expressed protein                                                                             | Chr2  | 29800719 | 29801815 + | 1  | 1129 | 5.03 |
| LOC_Os08g40590.1 | oxysterol-binding protein, putative, expressed                                                | Chr8  | 25694808 | 25699639 + | 6  | 1969 | 5.03 |
| LOC_Os01g58550.2 | methyladenine glycosylase, putative, expressed                                                | Chr1  | 33837388 | 33838996 + | 4  | 1448 | 5.03 |
| LOC_Os01g52530.1 | phosphoribosyl transferase, putative, expressed                                               | Chr1  | 30180581 | 30184477 + | 7  | 1860 | 5.03 |
| LOC_Os05g01460.5 | STIP1 homology and U box-containing protein 1, putative, expressed                            | Chr5  | 264430   | 266445 -   | 5  | 1459 | 5.03 |
| LOC_Os02g02470.1 | oxidoreductase, short chain dehydrogenase/reductase family domain containing protein, expres: | Chr2  | 870724   | 876616 +   | 8  | 2784 | 5.03 |
| LOC_Os01g27520.1 | tRNA synthetases class II domain containing protein, expressed                                | Chr1  | 15356779 | 15360684 - | 6  | 2313 | 5.03 |
| LOC_Os03g43900.2 | phosphatidylinositol N-acetylglucosaminyltransferase subunit P, putative, expressed           | Chr3  | 24630153 | 24634783 - | 7  | 1566 | 5.03 |
| LOC_Os03g31290.1 | membrane-anchored ubiquitin-fold protein, putative, expressed                                 | Chr3  | 17824178 | 17827706 + | 4  | 973  | 5.03 |
| LOC_Os03g31290.2 | membrane-anchored ubiquitin-fold protein, putative, expressed                                 | Chr3  | 17824178 | 17827704 + | 4  | 968  | 5.03 |
| LOC_Os07g12890.1 | metal cation transporter, putative, expressed                                                 | Chr7  | 7394515  | 7397715 +  | 3  | 1548 | 5.04 |
| LOC_Os07g12890.2 | metal cation transporter, putative, expressed                                                 | Chr7  | 7394486  | 7397715 +  | 4  | 1510 | 5.04 |
| LOC_Os04g04010.1 | expressed protein                                                                             | Chr4  | 1848746  | 1851594 -  | 3  | 1943 | 5.04 |
| LOC_Os04g59620.1 | SNF2 family N-terminal domain containing protein, expressed                                   | Chr4  | 35445920 | 35451211 - | 16 | 2878 | 5.04 |
| LOC_Os02g31874.1 | DUF803 domain containing, putative, expressed                                                 | Chr2  | 18827025 | 18831745 - | 14 | 2353 | 5.04 |
| LOC_Os02g31874.2 | DUF803 domain containing, putative, expressed                                                 | Chr2  | 18827025 | 18831745 - | 14 | 2341 | 5.04 |
| LOC_Os09g19570.1 | AGAP009532-PA, putative, expressed                                                            | Chr9  | 11707235 | 11710473 + | 8  | 1626 | 5.04 |
| LOC_Os12g03094.1 | expressed protein                                                                             | Chr12 | 1170641  | 1172382 +  | 1  | 1774 | 5.04 |
| LOC_Os05g36350.1 | pentatricopeptide, putative, expressed                                                        | Chr5  | 21518063 | 21519885 - | 1  | 1855 | 5.04 |
| LOC_Os02g20870.1 | SNI1, putative, expressed                                                                     | Chr2  | 12339729 | 12348543 - | 16 | 2714 | 5.04 |
| LOC_Os03g06900.1 | DNA topoisomerase 3 protein, putative, expressed                                              | Chr3  | 3489869  | 3500130 -  | 21 | 3159 | 5.04 |
| LOC_Os08g17610.1 | expressed protein                                                                             | Chr8  | 10767792 | 10771223 + | 4  | 1530 | 5.04 |
| LOC_Os10g35570.1 | expressed protein                                                                             | Chr10 | 19028120 | 19033623 + | 12 | 2175 | 5.04 |
| LOC_Os01g25600.1 | tetratricopeptide repeat domain containing protein, expressed                                 | Chr1  | 14506673 | 14513164 - | 9  | 2007 | 5.04 |
| LOC_Os10g05690.1 | transmembrane amino acid transporter protein, putative, expressed                             | Chr10 | 2849596  | 2855809 -  | 5  | 2289 | 5.04 |
| LOC_Os05g18950.1 | pentatricopeptide, putative, expressed                                                        | Chr5  | 11000428 | 11002159 + | 1  | 1764 | 5.04 |
| LOC_Os05g27930.1 | AP2 domain containing protein, expressed                                                      | Chr5  | 16296914 | 16300385 - | 2  | 1786 | 5.04 |
| LOC_Os10g27300.1 | expressed protein                                                                             | Chr10 | 14403026 | 14407182 + | 6  | 2979 | 5.04 |
| LOC_Os07g46540.1 | condensin complex subunit 1, putative, expressed                                              | Chr7  | 27791106 | 27799497 - | 17 | 5124 | 5.04 |
| LOC_Os02g55260.1 | DEAD-box ATP-dependent RNA helicase, putative, expressed                                      | Chr2  | 33838658 | 33843647 - | 10 | 2689 | 5.04 |
| LOC_Os02g55260.2 | DEAD-box ATP-dependent RNA helicase, putative, expressed                                      | Chr2  | 33838663 | 33843632 - | 10 | 2693 | 5.04 |
| LOC_Os05g01460.3 | STIP1 homology and U box-containing protein 1, putative, expressed                            | Chr5  | 264430   | 266445 -   | 4  | 1499 | 5.05 |
| LOC_Os08g09750.1 | OsFBL44 - F-box domain and LRR containing protein, expressed                                  | Chr8  | 5633346  | 5636364 +  | 5  | 2246 | 5.05 |
| LOC_Os07g33780.1 | pleiotropic drug resistance protein 5, putative, expressed                                    | Chr7  | 20214025 | 20218702 + | 8  | 2227 | 5.05 |
| LOC_Os04g58580.1 | phosphomannomutase, putative, expressed                                                       | Chr4  | 34828250 | 34831282 + | 11 | 1666 | 5.05 |
| LOC_Os06g14400.1 | 1-aminocyclopropane-1-carboxylate oxidase homolog 4, putative, expressed                      | Chr6  | 8038363  | 8041831 -  | 2  | 1562 | 5.05 |
| LOC_Os01g54890.1 | ethylene-responsive transcription factor 2, putative, expressed                               | Chr1  | 31567891 | 31568741 + | 2  | 778  | 5.05 |
| LOC_Os03g14710.1 | protein kinase, putative, expressed                                                           | Chr3  | 7998159  | 8000334 +  | 2  | 2107 | 5.05 |
| LOC_Os04g58580.2 | phosphomannomutase, putative, expressed                                                       | Chr4  | 34828250 | 34831279 + | 10 | 1840 | 5.05 |
| LOC_Os06g33330.1 | powdery mildew resistant protein 5, putative, expressed                                       | Chr6  | 19415169 | 19418493 + | 3  | 2057 | 5.05 |
| LOC_Os07g05870.1 | expressed protein                                                                             | Chr7  | 2819026  | 2822945 -  | 5  | 1541 | 5.05 |
| LOC_Os02g02580.1 | expressed protein                                                                             | Chr2  | 934586   | 937786 -   | 4  | 1698 | 5.05 |

|                  |                                                                                 |       |          |            |    |      |      |
|------------------|---------------------------------------------------------------------------------|-------|----------|------------|----|------|------|
| LOC_Os04g14204.1 | expressed protein                                                               | Chr4  | 7961018  | 7964447 -  | 4  | 1502 | 5.05 |
| LOC_Os04g14204.2 | expressed protein                                                               | Chr4  | 7961018  | 7964447 -  | 4  | 1502 | 5.05 |
| LOC_Os04g14204.3 | expressed protein                                                               | Chr4  | 7961018  | 7964447 -  | 4  | 1502 | 5.05 |
| LOC_Os02g02690.1 | expressed protein                                                               | Chr2  | 1008399  | 1011875 -  | 13 | 2038 | 5.05 |
| LOC_Os03g15840.1 | glycosyl transferase, group 1 domain containing protein, expressed              | Chr3  | 8737120  | 8741197 +  | 11 | 2410 | 5.05 |
| LOC_Os04g58690.1 | tRNA-specific adenosine deaminase 1, putative, expressed                        | Chr4  | 34892934 | 34895965 + | 9  | 1868 | 5.05 |
| LOC_Os07g36250.2 | peptide chain release factor protein, putative, expressed                       | Chr7  | 21668220 | 21671895 - | 7  | 1918 | 5.05 |
| LOC_Os07g36250.1 | peptide chain release factor protein, putative, expressed                       | Chr7  | 21668220 | 21671905 - | 7  | 1998 | 5.05 |
| LOC_Os07g36250.3 | peptide chain release factor protein, putative, expressed                       | Chr7  | 21668220 | 21671905 - | 7  | 2014 | 5.05 |
| LOC_Os03g54890.2 | ribosomal protein L13, putative, expressed                                      | Chr3  | 31203316 | 31205407 + | 5  | 1151 | 5.05 |
| LOC_Os01g35850.1 | Ras family domain containing protein, expressed                                 | Chr1  | 19851671 | 19854265 - | 8  | 1281 | 5.05 |
| LOC_Os03g51930.1 | expressed protein                                                               | Chr3  | 29789349 | 29791210 - | 4  | 1125 | 5.05 |
| LOC_Os05g48330.1 | aspartyl protease family protein, putative, expressed                           | Chr5  | 27701967 | 27705542 - | 2  | 2050 | 5.05 |
| LOC_Os08g34480.1 | splicing factor 3B subunit 5, putative, expressed                               | Chr8  | 21633732 | 21635115 - | 4  | 362  | 5.05 |
| LOC_Os10g33730.1 | pentatricopeptide, putative, expressed                                          | Chr10 | 17800146 | 17803223 - | 1  | 3110 | 5.05 |
| LOC_Os03g20410.1 | aquaporin SIP2-1, putative, expressed                                           | Chr3  | 11546447 | 11549084 - | 3  | 1275 | 5.05 |
| LOC_Os08g31940.1 | expressed protein                                                               | Chr8  | 19804132 | 19808804 + | 2  | 1811 | 5.05 |
| LOC_Os01g26290.1 | expressed protein                                                               | Chr1  | 14901174 | 14903208 + | 4  | 590  | 5.05 |
| LOC_Os02g30310.2 | ThiF family domain containing protein, putative, expressed                      | Chr2  | 18039129 | 18049883 + | 13 | 2150 | 5.06 |
| LOC_Os01g46040.1 | bromodomain domain containing protein, expressed                                | Chr1  | 26173185 | 26177230 - | 2  | 1223 | 5.06 |
| LOC_Os01g16250.1 | expressed protein                                                               | Chr1  | 9201354  | 9204450 +  | 3  | 852  | 5.06 |
| LOC_Os04g52340.1 | expressed protein                                                               | Chr4  | 31098474 | 31103030 - | 11 | 2000 | 5.06 |
| LOC_Os06g01840.2 | nodulin, putative, expressed                                                    | Chr6  | 477098   | 479491 +   | 6  | 2005 | 5.06 |
| LOC_Os06g01840.1 | nodulin, putative, expressed                                                    | Chr6  | 477098   | 479491 +   | 6  | 2010 | 5.06 |
| LOC_Os08g09300.1 | expressed protein                                                               | Chr8  | 5395453  | 5397528 +  | 3  | 1230 | 5.06 |
| LOC_Os02g25020.1 | DNA binding protein, putative, expressed                                        | Chr2  | 14507847 | 14509480 + | 1  | 1666 | 5.06 |
| LOC_Os02g30310.1 | ThiF family domain containing protein, putative, expressed                      | Chr2  | 18039080 | 18049883 + | 14 | 2291 | 5.06 |
| LOC_Os03g27950.2 | Ser/Thr protein phosphatase family protein, putative, expressed                 | Chr3  | 16051260 | 16058325 + | 13 | 2489 | 5.06 |
| LOC_Os08g34550.1 | RING-H2 finger protein, putative, expressed                                     | Chr8  | 21700152 | 21702495 + | 1  | 2376 | 5.06 |
| LOC_Os08g40590.2 | oxysterol-binding protein, putative, expressed                                  | Chr8  | 25696445 | 25699639 + | 5  | 1750 | 5.06 |
| LOC_Os05g48340.1 | proteasome-related, putative, expressed                                         | Chr5  | 27712350 | 27717899 + | 17 | 2696 | 5.06 |
| LOC_Os04g02354.1 | expressed protein                                                               | Chr4  | 835447   | 837343 +   | 2  | 706  | 5.06 |
| LOC_Os01g07590.1 | universal stress protein domain containing protein, putative, expressed         | Chr1  | 3645587  | 3650362 +  | 10 | 1697 | 5.06 |
| LOC_Os07g07900.1 | expressed protein                                                               | Chr7  | 3957966  | 3960638 -  | 2  | 1741 | 5.06 |
| LOC_Os06g12280.1 | glycosyl transferase 8 domain containing protein, putative, expressed           | Chr6  | 6605479  | 6608454 -  | 2  | 1980 | 5.06 |
| LOC_Os02g07350.1 | inositol-1-monophosphatase, putative, expressed                                 | Chr2  | 3792680  | 3796762 -  | 10 | 1658 | 5.06 |
| LOC_Os11g06670.1 | expressed protein                                                               | Chr11 | 3246517  | 3249930 +  | 8  | 1965 | 5.06 |
| LOC_Os11g31760.1 | transposon protein, putative, unclassified, expressed                           | Chr11 | 18628655 | 18635481 - | 11 | 5210 | 5.07 |
| LOC_Os09g11850.1 | ulp1 protease family, C-terminal catalytic domain containing protein, expressed | Chr9  | 6643023  | 6646354 -  | 12 | 2406 | 5.07 |
| LOC_Os09g21802.1 | expressed protein                                                               | Chr9  | 13209614 | 13211693 - | 3  | 2002 | 5.07 |
| LOC_Os07g47970.1 | expressed protein                                                               | Chr7  | 28653858 | 28656014 + | 1  | 2189 | 5.07 |
| LOC_Os03g53980.1 | expressed protein                                                               | Chr3  | 30949716 | 30950765 + | 4  | 821  | 5.07 |
| LOC_Os03g53980.2 | expressed protein                                                               | Chr3  | 30949716 | 30950766 + | 5  | 773  | 5.07 |
| LOC_Os02g50600.1 | glycosyl transferase 8 domain containing protein, putative, expressed           | Chr2  | 30899534 | 30901300 - | 1  | 1799 | 5.07 |
| LOC_Os01g52864.2 | transmembrane protein, putative, expressed                                      | Chr1  | 30398944 | 30405920 + | 5  | 1865 | 5.07 |



|                  |                                                                                    |       |          |            |    |      |      |
|------------------|------------------------------------------------------------------------------------|-------|----------|------------|----|------|------|
| LOC_Os01g52864.1 | transmembrane protein, putative, expressed                                         | Chr1  | 30398944 | 30405920 + | 5  | 1868 | 5.07 |
| LOC_Os01g52864.4 | transmembrane protein, putative, expressed                                         | Chr1  | 30398944 | 30405920 + | 5  | 1870 | 5.07 |
| LOC_Os06g46120.1 | expressed protein                                                                  | Chr6  | 27953690 | 27956183 - | 4  | 653  | 5.07 |
| LOC_Os04g52410.2 | OsMADS31 - MADS-box family gene with MIKCC type-box, expressed                     | Chr4  | 31143083 | 31144886 + | 7  | 1014 | 5.07 |
| LOC_Os01g61180.1 | exo70 exocyst complex subunit domain containing protein, expressed                 | Chr1  | 35409290 | 35411747 + | 1  | 2490 | 5.07 |
| LOC_Os10g33910.1 | mitochondrial import inner membrane translocase subunit Tim16, putative, expressed | Chr10 | 18006943 | 18009746 + | 4  | 945  | 5.07 |
| LOC_Os01g47420.3 | pterin-4-alpha-carbinolamine dehydratase, putative, expressed                      | Chr1  | 27097261 | 27100314 + | 5  | 885  | 5.07 |
| LOC_Os05g35070.1 | DUF630/DUF632 domains containing protein, putative, expressed                      | Chr5  | 20816584 | 20820780 - | 4  | 3185 | 5.07 |
| LOC_Os05g27930.2 | AP2 domain containing protein, expressed                                           | Chr5  | 16296925 | 16300379 - | 3  | 1857 | 5.07 |
| LOC_Os05g27930.4 | AP2 domain containing protein, expressed                                           | Chr5  | 16296914 | 16300385 - | 3  | 1871 | 5.07 |
| LOC_Os01g37280.7 | expressed protein                                                                  | Chr1  | 20816985 | 20820446 + | 4  | 1392 | 5.07 |
| LOC_Os01g37280.6 | expressed protein                                                                  | Chr1  | 20816955 | 20820446 + | 5  | 1341 | 5.07 |
| LOC_Os01g37280.5 | expressed protein                                                                  | Chr1  | 20816955 | 20820446 + | 5  | 1334 | 5.07 |
| LOC_Os01g37280.8 | expressed protein                                                                  | Chr1  | 20816985 | 20820446 + | 5  | 1322 | 5.07 |
| LOC_Os01g37280.4 | expressed protein                                                                  | Chr1  | 20816985 | 20820446 + | 5  | 1308 | 5.07 |
| LOC_Os01g72250.1 | uridine 5-monophosphate synthase, putative, expressed                              | Chr1  | 41892678 | 41896242 + | 6  | 1902 | 5.07 |
| LOC_Os03g48920.2 | DUF1517 domain containing protein, putative, expressed                             | Chr3  | 27854800 | 27857397 + | 4  | 1420 | 5.07 |
| LOC_Os05g46520.1 | polygalacturonase, putative, expressed                                             | Chr5  | 26943380 | 26945869 + | 9  | 1844 | 5.07 |
| LOC_Os05g48340.3 | proteasome-related, putative, expressed                                            | Chr5  | 27712350 | 27717899 + | 16 | 2899 | 5.07 |
| LOC_Os02g54060.2 | chaperonin, putative, expressed                                                    | Chr2  | 33114780 | 33117303 - | 4  | 1060 | 5.07 |
| LOC_Os05g48340.2 | proteasome-related, putative, expressed                                            | Chr5  | 27712350 | 27717899 + | 16 | 2753 | 5.07 |
| LOC_Os06g09090.3 | glutamate receptor 2.8 precursor, putative, expressed                              | Chr6  | 4571088  | 4574927 -  | 5  | 2158 | 5.07 |
| LOC_Os06g09090.2 | glutamate receptor 2.8 precursor, putative, expressed                              | Chr6  | 4571088  | 4574911 -  | 6  | 2243 | 5.07 |
| LOC_Os02g47280.2 | growth-regulating factor, putative, expressed                                      | Chr2  | 28863173 | 28866997 - | 5  | 1784 | 5.07 |
| LOC_Os02g47280.1 | growth-regulating factor, putative, expressed                                      | Chr2  | 28863173 | 28866997 - | 4  | 1849 | 5.07 |
| LOC_Os04g44560.1 | expressed protein                                                                  | Chr4  | 26375704 | 26380073 + | 6  | 1856 | 5.07 |
| LOC_Os01g52260.1 | serine acetyltransferase protein, putative, expressed                              | Chr1  | 30042527 | 30043938 + | 1  | 1444 | 5.07 |
| LOC_Os12g42060.2 | OsWAK128b - OsWAK receptor-like protein kinase, expressed                          | Chr12 | 26087463 | 26088874 + | 1  | 1444 | 5.07 |
| LOC_Os02g12654.2 | expressed protein                                                                  | Chr2  | 6608061  | 6611040 +  | 2  | 1688 | 5.07 |
| LOC_Os01g40570.1 | outer mitochondrial membrane porin, putative, expressed                            | Chr1  | 22908180 | 22910687 - | 6  | 1530 | 5.07 |
| LOC_Os02g49570.1 | OsProtIV1 - Putative Protease IV homologue%3B Domain 2 is a SPH, expressed         | Chr2  | 30297164 | 30306169 - | 13 | 2894 | 5.08 |
| LOC_Os10g37190.1 | protein kinase domain containing protein, expressed                                | Chr10 | 19899083 | 19900928 - | 2  | 1797 | 5.08 |
| LOC_Os04g05050.1 | pectate lyase precursor, putative, expressed                                       | Chr4  | 2480533  | 2485914 +  | 7  | 2290 | 5.08 |
| LOC_Os04g05050.2 | pectate lyase precursor, putative, expressed                                       | Chr4  | 2483098  | 2485914 +  | 4  | 2281 | 5.08 |
| LOC_Os12g08170.1 | 2-oxo acid dehydrogenases acyltransferase domain containing protein, expressed     | Chr12 | 4171977  | 4176907 -  | 6  | 2037 | 5.08 |
| LOC_Os12g44130.1 | expressed protein                                                                  | Chr12 | 27374585 | 27377742 + | 1  | 3190 | 5.08 |
| LOC_Os06g09090.1 | glutamate receptor 2.8 precursor, putative, expressed                              | Chr6  | 4571088  | 4574911 -  | 5  | 2177 | 5.08 |
| LOC_Os06g09090.4 | glutamate receptor 2.8 precursor, putative, expressed                              | Chr6  | 4571088  | 4574911 -  | 6  | 2278 | 5.08 |
| LOC_Os06g41910.1 | expressed protein                                                                  | Chr6  | 25145626 | 25148023 + | 2  | 1985 | 5.08 |
| LOC_Os02g13520.1 | OsIAA7 - Auxin-responsive Aux/IAA gene family member, expressed                    | Chr2  | 7245015  | 7248672 -  | 6  | 1725 | 5.08 |
| LOC_Os03g27950.1 | Ser/Thr protein phosphatase family protein, putative, expressed                    | Chr3  | 16051260 | 16058325 + | 13 | 2582 | 5.08 |
| LOC_Os05g32980.1 | expressed protein                                                                  | Chr5  | 19334024 | 19334424 + | 2  | 364  | 5.08 |
| LOC_Os04g50860.1 | expressed protein                                                                  | Chr4  | 30077624 | 30080399 - | 3  | 1547 | 5.08 |
| LOC_Os01g37510.1 | peptide deformylase, putative, expressed                                           | Chr1  | 20953958 | 20955515 - | 4  | 1300 | 5.08 |
| LOC_Os08g33700.1 | pentatricopeptide, putative, expressed                                             | Chr8  | 21043003 | 21047252 + | 3  | 3490 | 5.08 |

|                  |                                                                                          |       |          |            |    |      |      |
|------------------|------------------------------------------------------------------------------------------|-------|----------|------------|----|------|------|
| LOC_Os02g06290.2 | rhodanese-like domain containing protein, putative, expressed                            | Chr2  | 3142294  | 3144660 +  | 5  | 1464 | 5.08 |
| LOC_Os02g06290.1 | rhodanese-like domain containing protein, putative, expressed                            | Chr2  | 3141992  | 3144660 +  | 7  | 1577 | 5.08 |
| LOC_Os11g17280.1 | expressed protein                                                                        | Chr11 | 9621240  | 9626529 -  | 4  | 4646 | 5.08 |
| LOC_Os03g57900.1 | zinc finger A20 and AN1 domain-containing stress-associated protein, putative, expressed | Chr3  | 32982032 | 32982969 - | 1  | 970  | 5.08 |
| LOC_Os05g49650.2 | expressed protein                                                                        | Chr5  | 28480921 | 28482905 - | 2  | 775  | 5.08 |
| LOC_Os01g56400.1 | ABC transporter, ATP-binding protein, putative, expressed                                | Chr1  | 32513693 | 32517028 - | 5  | 1198 | 5.08 |
| LOC_Os08g02400.1 | 40S ribosomal protein S13, putative, expressed                                           | Chr8  | 956309   | 958681 -   | 5  | 1029 | 5.09 |
| LOC_Os01g47420.1 | pterin-4-alpha-carbinolamine dehydratase, putative, expressed                            | Chr1  | 27095458 | 27100314 + | 7  | 1193 | 5.09 |
| LOC_Os01g43230.3 | expressed protein                                                                        | Chr1  | 24695828 | 24697913 - | 4  | 959  | 5.09 |
| LOC_Os01g43230.2 | expressed protein                                                                        | Chr1  | 24695760 | 24697913 - | 4  | 1030 | 5.09 |
| LOC_Os12g43664.1 | FGGY family of carbohydrate kinases, putative, expressed                                 | Chr12 | 27128006 | 27131959 - | 11 | 2641 | 5.09 |
| LOC_Os11g01869.1 | double-stranded RNA binding motif containing protein, expressed                          | Chr11 | 457104   | 461678 -   | 4  | 2048 | 5.09 |
| LOC_Os11g01869.2 | double-stranded RNA binding motif containing protein, expressed                          | Chr11 | 457117   | 461678 -   | 5  | 1981 | 5.09 |
| LOC_Os02g58550.1 | chloroplast channel forming outer membrane protein, putative, expressed                  | Chr2  | 35784842 | 35787820 - | 5  | 1088 | 5.09 |
| LOC_Os03g11110.1 | zinc finger family protein, putative, expressed                                          | Chr3  | 5710186  | 5715012 -  | 9  | 2769 | 5.09 |
| LOC_Os11g37060.1 | OsFBDUF52 - F-box and DUF domain containing protein, expressed                           | Chr11 | 21881616 | 21882979 + | 1  | 1396 | 5.09 |
| LOC_Os04g57150.1 | tafazzin, putative, expressed                                                            | Chr4  | 34054300 | 34058149 - | 5  | 1406 | 5.09 |
| LOC_Os04g57150.2 | tafazzin, putative, expressed                                                            | Chr4  | 34054300 | 34058149 - | 5  | 1396 | 5.09 |
| LOC_Os12g02960.1 | glutathione S-transferase, putative, expressed                                           | Chr12 | 1097476  | 1098454 +  | 2  | 975  | 5.09 |
| LOC_Os04g46050.1 | Alg9-like mannosyltransferase protein, putative, expressed                               | Chr4  | 27275215 | 27282749 - | 20 | 2721 | 5.09 |
| LOC_Os05g28950.2 | CAAX amino terminal protease family protein, putative, expressed                         | Chr5  | 16972939 | 16975971 + | 7  | 1844 | 5.09 |
| LOC_Os12g08830.1 | thylakoid luminal 29.8 kDa protein, putative, expressed                                  | Chr12 | 4555855  | 4558043 -  | 5  | 1509 | 5.09 |
| LOC_Os12g08830.2 | thylakoid luminal 29.8 kDa protein, putative, expressed                                  | Chr12 | 4555855  | 4558043 -  | 5  | 1513 | 5.09 |
| LOC_Os06g01230.2 | no apical meristem protein, putative, expressed                                          | Chr6  | 153391   | 156618 -   | 5  | 2468 | 5.09 |
| LOC_Os06g01230.1 | no apical meristem protein, putative, expressed                                          | Chr6  | 153391   | 156618 -   | 6  | 2399 | 5.09 |
| LOC_Os01g49180.1 | ATP dependent DNA ligase family protein, putative, expressed                             | Chr1  | 28261415 | 28273067 - | 21 | 5040 | 5.09 |
| LOC_Os01g47420.2 | pterin-4-alpha-carbinolamine dehydratase, putative, expressed                            | Chr1  | 27095458 | 27100314 + | 6  | 1279 | 5.09 |
| LOC_Os03g11380.3 | SNARE domain containing protein, putative, expressed                                     | Chr3  | 5860717  | 5863891 +  | 6  | 1509 | 5.09 |
| LOC_Os04g08180.1 | expressed protein                                                                        | Chr4  | 4349134  | 4352198 +  | 6  | 795  | 5.09 |
| LOC_Os04g51570.1 | tyrosine phosphatase, putative, expressed                                                | Chr4  | 30550961 | 30552136 + | 2  | 864  | 5.09 |
| LOC_Os02g26614.1 | retrotransposon protein, putative, unclassified, expressed                               | Chr2  | 15621008 | 15629984 + | 12 | 3381 | 5.09 |
| LOC_Os09g06970.1 | transport protein particle component, Bet3, domain containing protein, expressed         | Chr9  | 3369499  | 3376004 +  | 4  | 1272 | 5.10 |
| LOC_Os08g03450.1 | ribosomal protein L37, putative, expressed                                               | Chr8  | 1619214  | 1621401 +  | 4  | 662  | 5.10 |
| LOC_Os04g40940.2 | mitotic spindle checkpoint protein MAD2, putative, expressed                             | Chr4  | 24301441 | 24303182 - | 5  | 1455 | 5.10 |
| LOC_Os04g40940.1 | mitotic spindle checkpoint protein MAD2, putative, expressed                             | Chr4  | 24301441 | 24303171 - | 6  | 1316 | 5.10 |
| LOC_Os02g55010.1 | expressed protein                                                                        | Chr2  | 33700414 | 33706335 + | 7  | 3996 | 5.10 |
| LOC_Os11g32780.1 | expressed protein                                                                        | Chr11 | 19362542 | 19366156 + | 3  | 1235 | 5.10 |
| LOC_Os01g52050.1 | systemin receptor SR160 precursor, putative, expressed                                   | Chr1  | 29927543 | 29931487 - | 1  | 3977 | 5.10 |
| LOC_Os01g65650.1 | receptor-like protein kinase HAIKU2 precursor, putative, expressed                       | Chr1  | 38112066 | 38118720 + | 3  | 4206 | 5.10 |
| LOC_Os03g63470.1 | retrotransposon protein, putative, unclassified, expressed                               | Chr3  | 35855445 | 35860549 + | 7  | 2425 | 5.10 |
| LOC_Os12g37850.1 | expressed protein                                                                        | Chr12 | 23256397 | 23258478 - | 5  | 589  | 5.10 |
| LOC_Os09g06970.3 | transport protein particle component, Bet3, domain containing protein, expressed         | Chr9  | 3369503  | 3376004 +  | 3  | 1310 | 5.10 |
| LOC_Os07g29750.1 | glycosyl hydrolases family 16, putative, expressed                                       | Chr7  | 17490699 | 17493026 + | 4  | 1768 | 5.10 |
| LOC_Os05g35720.1 | transmembrane protein 18, putative, expressed                                            | Chr5  | 21205865 | 21207702 + | 4  | 989  | 5.10 |
| LOC_Os08g30260.1 | retrotransposon protein, putative, unclassified, expressed                               | Chr8  | 18598676 | 18601822 + | 9  | 1617 | 5.10 |

|                  |                                                                                           |       |          |            |    |      |      |
|------------------|-------------------------------------------------------------------------------------------|-------|----------|------------|----|------|------|
| LOC_Os01g70300.3 | aspartokinase 3, chloroplast precursor, putative, expressed                               | Chr1  | 40709993 | 40712960 - | 9  | 1690 | 5.10 |
| LOC_Os04g40050.2 | ribonuclease H2 subunit B, putative, expressed                                            | Chr4  | 23843544 | 23847934 + | 8  | 2797 | 5.10 |
| LOC_Os01g45390.2 | HD domain containing protein 2, putative, expressed                                       | Chr1  | 25762489 | 25766525 + | 8  | 1547 | 5.10 |
| LOC_Os02g32540.1 | ubiquitin carboxyl-terminal hydrolase, family 1, putative, expressed                      | Chr2  | 19260158 | 19262201 + | 2  | 1718 | 5.10 |
| LOC_Os01g09410.1 | expressed protein                                                                         | Chr1  | 4791837  | 4795348 +  | 5  | 1740 | 5.10 |
| LOC_Os08g34740.1 | SGT1 protein, putative, expressed                                                         | Chr8  | 21835042 | 21840598 - | 5  | 2830 | 5.10 |
| LOC_Os03g48190.1 | expressed protein                                                                         | Chr3  | 27431844 | 27436602 - | 4  | 1870 | 5.10 |
| LOC_Os05g51190.2 | protein kinase family protein, putative, expressed                                        | Chr5  | 29359930 | 29364139 - | 7  | 3480 | 5.10 |
| LOC_Os03g40310.1 | RNA recognition motif containing protein, putative, expressed                             | Chr3  | 22413557 | 22418672 - | 3  | 1133 | 5.10 |
| LOC_Os06g29370.1 | expressed protein                                                                         | Chr6  | 16791220 | 16793141 + | 2  | 619  | 5.11 |
| LOC_Os03g57569.1 | expressed protein                                                                         | Chr3  | 32826350 | 32828545 - | 1  | 2228 | 5.11 |
| LOC_Os08g41850.1 | expressed protein                                                                         | Chr8  | 26430703 | 26432939 - | 3  | 987  | 5.11 |
| LOC_Os10g35940.1 | folylpolyglutamate synthetase, putative, expressed                                        | Chr10 | 19201521 | 19206783 - | 15 | 2612 | 5.11 |
| LOC_Os10g39930.1 | cytochrome P450 97B2, putative, expressed                                                 | Chr10 | 21368384 | 21373100 + | 10 | 2195 | 5.11 |
| LOC_Os03g40180.2 | 60S ribosomal protein L15, putative, expressed                                            | Chr3  | 22336536 | 22338317 - | 3  | 1241 | 5.11 |
| LOC_Os03g40180.1 | 60S ribosomal protein L15, putative, expressed                                            | Chr3  | 22336536 | 22338324 - | 4  | 1170 | 5.11 |
| LOC_Os04g58055.1 | expressed protein                                                                         | Chr4  | 34579362 | 34579978 - | 1  | 649  | 5.11 |
| LOC_Os01g15120.1 | hydrolase, alpha/beta fold family domain containing protein, expressed                    | Chr1  | 8486472  | 8489700 +  | 3  | 1448 | 5.11 |
| LOC_Os09g02300.1 | expressed protein                                                                         | Chr9  | 937054   | 938291 -   | 1  | 1270 | 5.11 |
| LOC_Os07g02950.1 | expressed protein                                                                         | Chr7  | 1096376  | 1101697 -  | 11 | 3019 | 5.11 |
| LOC_Os03g03570.2 | leucine-rich repeat transmembrane protein kinase, putative, expressed                     | Chr3  | 1562044  | 1566906 +  | 3  | 4476 | 5.11 |
| LOC_Os09g25865.1 | expressed protein                                                                         | Chr9  | 15502457 | 15508094 + | 6  | 1550 | 5.11 |
| LOC_Os11g32480.1 | TPR repeat region family protein, expressed                                               | Chr11 | 19172888 | 19174968 + | 4  | 1029 | 5.11 |
| LOC_Os03g54890.1 | ribosomal protein L13, putative, expressed                                                | Chr3  | 31203316 | 31205407 + | 4  | 1194 | 5.11 |
| LOC_Os01g09670.1 | pollen-specific protein SF21, putative, expressed                                         | Chr1  | 4982142  | 4985143 -  | 11 | 1872 | 5.11 |
| LOC_Os02g09590.1 | ribosome, putative, expressed                                                             | Chr2  | 4936410  | 4937806 -  | 2  | 912  | 5.11 |
| LOC_Os03g54890.3 | ribosomal protein L13, putative, expressed                                                | Chr3  | 31203316 | 31205407 + | 3  | 1260 | 5.11 |
| LOC_Os02g02770.1 | PPR repeat domain containing protein, putative, expressed                                 | Chr2  | 1047595  | 1050120 -  | 2  | 2490 | 5.11 |
| LOC_Os04g47912.1 | expressed protein                                                                         | Chr4  | 28489410 | 28494426 - | 4  | 3991 | 5.11 |
| LOC_Os04g47912.2 | expressed protein                                                                         | Chr4  | 28489410 | 28494426 - | 4  | 3999 | 5.11 |
| LOC_Os08g16610.1 | Rad21 / Rec8 like protein, putative, expressed                                            | Chr8  | 10160231 | 10165699 + | 11 | 3208 | 5.12 |
| LOC_Os02g46460.1 | peptide transporter PTR2, putative, expressed                                             | Chr2  | 28312589 | 28316198 - | 5  | 2507 | 5.12 |
| LOC_Os02g46460.2 | peptide transporter PTR2, putative, expressed                                             | Chr2  | 28312589 | 28316198 - | 4  | 2673 | 5.12 |
| LOC_Os01g32864.1 | retrotransposon protein, putative, unclassified, expressed                                | Chr1  | 18033722 | 18036566 - | 4  | 961  | 5.12 |
| LOC_Os08g23320.1 | para-hydroxybenzoate--polyprenyltransferase, mitochondrial precursor, putative, expressed | Chr8  | 14078934 | 14082484 - | 9  | 2576 | 5.12 |
| LOC_Os01g42620.1 | pentatricopeptide containing protein, putative, expressed                                 | Chr1  | 24239930 | 24245230 - | 4  | 3705 | 5.12 |
| LOC_Os05g49650.1 | expressed protein                                                                         | Chr5  | 28480921 | 28482905 - | 3  | 825  | 5.12 |
| LOC_Os06g27790.1 | pentatricopeptide, putative, expressed                                                    | Chr6  | 15733745 | 15737718 + | 3  | 2907 | 5.12 |
| LOC_Os10g04770.1 | expressed protein                                                                         | Chr10 | 2289182  | 2292768 -  | 3  | 1068 | 5.12 |
| LOC_Os03g52940.1 | expressed protein                                                                         | Chr3  | 30368953 | 30369800 + | 1  | 880  | 5.12 |
| LOC_Os01g64300.1 | DUF584 domain containing protein, putative, expressed                                     | Chr1  | 37323884 | 37324908 + | 1  | 1057 | 5.12 |
| LOC_Os01g55020.4 | expressed protein                                                                         | Chr1  | 31635565 | 31638417 + | 3  | 980  | 5.12 |
| LOC_Os07g08460.1 | OslAA24 - Auxin-responsive Aux/IAA gene family member, expressed                          | Chr7  | 4355211  | 4356575 -  | 3  | 1262 | 5.12 |
| LOC_Os07g08460.2 | OslAA24 - Auxin-responsive Aux/IAA gene family member, expressed                          | Chr7  | 4355211  | 4356575 -  | 2  | 1342 | 5.12 |
| LOC_Os06g10750.1 | integral membrane protein DUF6 containing protein, expressed                              | Chr6  | 5613999  | 5617153 +  | 5  | 1934 | 5.12 |

|                  |                                                                                          |       |          |            |    |      |      |
|------------------|------------------------------------------------------------------------------------------|-------|----------|------------|----|------|------|
| LOC_Os02g38020.2 | inorganic phosphate transporter 2-1, chloroplast precursor, putative, expressed          | Chr2  | 22971563 | 22975296 + | 3  | 2516 | 5.12 |
| LOC_Os02g38020.1 | inorganic phosphate transporter 2-1, chloroplast precursor, putative, expressed          | Chr2  | 22971563 | 22975296 + | 3  | 2705 | 5.12 |
| LOC_Os09g35980.2 | expressed protein                                                                        | Chr9  | 20731589 | 20734728 - | 4  | 2768 | 5.12 |
| LOC_Os03g29184.1 | expressed protein                                                                        | Chr3  | 16586519 | 16587292 - | 1  | 806  | 5.12 |
| LOC_Os03g51550.3 | WD repeat-containing protein 5, putative, expressed                                      | Chr3  | 29486017 | 29490549 + | 3  | 1556 | 5.12 |
| LOC_Os07g02350.1 | casein kinase II subunit alpha-2, putative, expressed                                    | Chr7  | 799478   | 805187 -   | 10 | 1952 | 5.13 |
| LOC_Os03g11380.1 | SNARE domain containing protein, putative, expressed                                     | Chr3  | 5860717  | 5863894 +  | 6  | 1518 | 5.13 |
| LOC_Os06g47900.2 | expressed protein                                                                        | Chr6  | 28977492 | 28978790 + | 3  | 1005 | 5.13 |
| LOC_Os02g45250.1 | homeobox and START domains containing protein, putative, expressed                       | Chr2  | 27487865 | 27494914 - | 9  | 3725 | 5.13 |
| LOC_Os06g50350.1 | expressed protein                                                                        | Chr6  | 30479410 | 30480798 + | 2  | 682  | 5.13 |
| LOC_Os12g37640.3 | xaa-Pro aminopeptidase, putative, expressed                                              | Chr12 | 23106121 | 23111532 + | 12 | 2456 | 5.13 |
| LOC_Os12g37640.1 | xaa-Pro aminopeptidase, putative, expressed                                              | Chr12 | 23106121 | 23111532 + | 13 | 2403 | 5.13 |
| LOC_Os12g37640.4 | xaa-Pro aminopeptidase, putative, expressed                                              | Chr12 | 23106121 | 23111532 + | 13 | 2375 | 5.13 |
| LOC_Os09g14510.3 | peroxin-3 family protein, putative, expressed                                            | Chr9  | 8585970  | 8589949 +  | 6  | 1989 | 5.13 |
| LOC_Os09g14510.1 | peroxin-3 family protein, putative, expressed                                            | Chr9  | 8585970  | 8589949 +  | 7  | 1918 | 5.13 |
| LOC_Os09g14510.2 | peroxin-3 family protein, putative, expressed                                            | Chr9  | 8586239  | 8589949 +  | 6  | 1754 | 5.13 |
| LOC_Os12g31450.1 | plastid division regulator MinE, putative, expressed                                     | Chr12 | 18913254 | 18915691 - | 2  | 1143 | 5.13 |
| LOC_Os03g30920.1 | OsFBX95 - F-box domain containing protein, expressed                                     | Chr3  | 17611344 | 17613660 + | 2  | 1308 | 5.13 |
| LOC_Os03g13750.2 | erwinia induced protein 2, putative, expressed                                           | Chr3  | 7446001  | 7449611 -  | 4  | 932  | 5.13 |
| LOC_Os02g37856.1 | expressed protein                                                                        | Chr2  | 22872113 | 22880241 - | 19 | 2692 | 5.13 |
| LOC_Os05g36184.1 | expressed protein                                                                        | Chr5  | 21451508 | 21455835 - | 3  | 813  | 5.13 |
| LOC_Os12g13660.1 | expressed protein                                                                        | Chr12 | 7678707  | 7686107 -  | 7  | 4620 | 5.13 |
| LOC_Os01g34060.1 | MYB family transcription factor, putative, expressed                                     | Chr1  | 18755268 | 18756900 + | 2  | 1576 | 5.13 |
| LOC_Os05g33514.2 | expressed protein                                                                        | Chr5  | 19684770 | 19686823 - | 4  | 741  | 5.13 |
| LOC_Os04g01590.1 | arginase, putative, expressed                                                            | Chr4  | 396481   | 400947 +   | 6  | 1801 | 5.13 |
| LOC_Os01g52864.3 | transmembrane protein, putative, expressed                                               | Chr1  | 30398944 | 30405920 + | 6  | 1994 | 5.13 |
| LOC_Os07g15680.1 | phospholipase D, putative, expressed                                                     | Chr7  | 9105495  | 9112919 -  | 12 | 3662 | 5.13 |
| LOC_Os10g21360.1 | N-dimethylguanosine tRNA methyltransferase, putative, expressed                          | Chr10 | 10932181 | 10939475 + | 13 | 2738 | 5.13 |
| LOC_Os06g45050.1 | clathrin assembly protein, putative, expressed                                           | Chr6  | 27257457 | 27261082 + | 14 | 2044 | 5.14 |
| LOC_Os10g05530.3 | OsFBX372 - F-box domain containing protein, expressed                                    | Chr10 | 2737043  | 2741865 -  | 3  | 1782 | 5.14 |
| LOC_Os10g05530.2 | OsFBX372 - F-box domain containing protein, expressed                                    | Chr10 | 2737043  | 2741865 -  | 3  | 1794 | 5.14 |
| LOC_Os07g28790.1 | PAP fibrillin family domain containing protein, expressed                                | Chr7  | 16857192 | 16862643 + | 11 | 1879 | 5.14 |
| LOC_Os05g49920.1 | pentatricopeptide, putative, expressed                                                   | Chr5  | 28633062 | 28635805 + | 1  | 2776 | 5.14 |
| LOC_Os03g18130.2 | asparagine synthetase, putative, expressed                                               | Chr3  | 10119873 | 10123725 - | 12 | 2885 | 5.14 |
| LOC_Os12g03816.1 | OsCML3 - Calmodulin-related calcium sensor protein, expressed                            | Chr12 | 1559859  | 1561568 -  | 3  | 1477 | 5.14 |
| LOC_Os05g11260.2 | expressed protein                                                                        | Chr5  | 6358099  | 6362407 -  | 15 | 2495 | 5.14 |
| LOC_Os05g44916.1 | mitochondrial-processing peptidase subunit, mitochondrial precursor, putative, expressed | Chr5  | 26101219 | 26106271 + | 13 | 2441 | 5.14 |
| LOC_Os10g21360.2 | N-dimethylguanosine tRNA methyltransferase, putative, expressed                          | Chr10 | 10932181 | 10939475 + | 12 | 2788 | 5.14 |
| LOC_Os05g08970.1 | SSRP1-like FACT complex subunit, putative, expressed                                     | Chr5  | 4965425  | 4971029 +  | 16 | 2997 | 5.14 |
| LOC_Os01g54240.1 | nucleoporin, putative, expressed                                                         | Chr1  | 31203443 | 31211275 + | 18 | 3242 | 5.15 |
| LOC_Os03g17690.2 | OsAPx1 - Cytosolic Ascorbate Peroxidase encoding gene 1-8, expressed                     | Chr3  | 9843327  | 9846747 +  | 8  | 1510 | 5.15 |
| LOC_Os03g17690.1 | OsAPx1 - Cytosolic Ascorbate Peroxidase encoding gene 1-8, expressed                     | Chr3  | 9843327  | 9846747 +  | 9  | 1447 | 5.15 |
| LOC_Os03g11380.2 | SNARE domain containing protein, putative, expressed                                     | Chr3  | 5860717  | 5863894 +  | 6  | 1807 | 5.15 |
| LOC_Os06g39040.1 | dehydrogenase/reductase SDR family member 12, putative, expressed                        | Chr6  | 23181234 | 23184507 + | 10 | 1747 | 5.15 |
| LOC_Os04g46050.3 | Alg9-like mannosyltransferase protein, putative, expressed                               | Chr4  | 27275215 | 27282769 - | 21 | 2808 | 5.15 |

|                  |                                                                                                 |       |          |            |    |      |      |
|------------------|-------------------------------------------------------------------------------------------------|-------|----------|------------|----|------|------|
| LOC_Os04g46050.2 | Alg9-like mannosyltransferase protein, putative, expressed                                      | Chr4  | 27275215 | 27282769 - | 21 | 2817 | 5.15 |
| LOC_Os06g42540.2 | expressed protein                                                                               | Chr6  | 25583151 | 25585089 + | 3  | 1759 | 5.15 |
| LOC_Os02g58580.5 | cation efflux family protein, putative, expressed                                               | Chr2  | 35810519 | 35812446 + | 7  | 1318 | 5.15 |
| LOC_Os07g27960.1 | thioesterase family protein, putative, expressed                                                | Chr7  | 16306862 | 16309642 - | 3  | 1567 | 5.15 |
| LOC_Os01g46500.4 | OsFBX21 - F-box domain containing protein, expressed                                            | Chr1  | 26449051 | 26452875 + | 3  | 2262 | 5.15 |
| LOC_Os10g33800.3 | lactate/malate dehydrogenase, putative, expressed                                               | Chr10 | 17913818 | 17917850 + | 6  | 1775 | 5.15 |
| LOC_Os01g62420.3 | triosephosphate isomerase, cytosolic, putative, expressed                                       | Chr1  | 36129310 | 36131617 + | 6  | 1045 | 5.15 |
| LOC_Os10g33800.1 | lactate/malate dehydrogenase, putative, expressed                                               | Chr10 | 17913818 | 17917850 + | 7  | 1712 | 5.15 |
| LOC_Os10g33800.2 | lactate/malate dehydrogenase, putative, expressed                                               | Chr10 | 17913818 | 17917848 + | 6  | 1804 | 5.15 |
| LOC_Os01g48920.1 | beclin-1, putative, expressed                                                                   | Chr1  | 28070679 | 28076428 - | 10 | 2474 | 5.15 |
| LOC_Os01g64090.1 | L1P family of ribosomal proteins domain containing protein, expressed                           | Chr1  | 37231748 | 37234375 + | 6  | 909  | 5.16 |
| LOC_Os05g34550.1 | MLO domain containing protein, putative, expressed                                              | Chr5  | 20484912 | 20490183 - | 13 | 2534 | 5.16 |
| LOC_Os05g34550.2 | MLO domain containing protein, putative, expressed                                              | Chr5  | 20484912 | 20490183 - | 13 | 2542 | 5.16 |
| LOC_Os02g54060.1 | chaperonin, putative, expressed                                                                 | Chr2  | 33114780 | 33117303 - | 5  | 1272 | 5.16 |
| LOC_Os05g44916.2 | mitochondrial-processing peptidase subunit, mitochondrial precursor, putative, expressed        | Chr5  | 26101976 | 26106425 + | 12 | 2611 | 5.16 |
| LOC_Os05g20520.1 | retrotransposon protein, putative, Ty3-gypsy subclass                                           | Chr5  | 12045112 | 12047043 - | 3  | 966  | 5.16 |
| LOC_Os04g57230.2 | regulatory protein RecX family protein, putative, expressed                                     | Chr4  | 34091668 | 34095411 + | 7  | 1878 | 5.16 |
| LOC_Os04g57230.1 | regulatory protein RecX family protein, putative, expressed                                     | Chr4  | 34091609 | 34095419 + | 7  | 1948 | 5.16 |
| LOC_Os04g01990.1 | pentatricopeptide domain containing protein, putative, expressed                                | Chr4  | 613779   | 616346 -   | 1  | 2600 | 5.16 |
| LOC_Os01g59570.1 | senescence-induced receptor-like serine/threonine-protein kinase precursor, putative, expressed | Chr1  | 34445743 | 34454439 - | 12 | 3555 | 5.16 |
| LOC_Os06g03514.2 | expressed protein                                                                               | Chr6  | 1354174  | 1359048 +  | 2  | 633  | 5.16 |
| LOC_Os07g25430.1 | photosystem I reaction center subunit IV A, chloroplast precursor, putative, expressed          | Chr7  | 14533304 | 14534386 + | 3  | 939  | 5.16 |
| LOC_Os12g20310.2 | sarcoma antigen NY-SAR-91, putative, expressed                                                  | Chr12 | 11862854 | 11865895 + | 5  | 1127 | 5.16 |
| LOC_Os04g49440.1 | RNA recognition motif containing protein, putative, expressed                                   | Chr4  | 29499367 | 29500598 + | 3  | 1035 | 5.16 |
| LOC_Os02g02490.1 | phytosulfokine receptor precursor, putative, expressed                                          | Chr2  | 884018   | 888245 +   | 1  | 4260 | 5.17 |
| LOC_Os08g23140.1 | expressed protein                                                                               | Chr8  | 13943831 | 13950707 + | 12 | 1659 | 5.17 |
| LOC_Os05g33600.1 | cytochrome P450 72A1, putative, expressed                                                       | Chr5  | 19756222 | 19758913 - | 4  | 2046 | 5.17 |
| LOC_Os07g14310.1 | expressed protein                                                                               | Chr7  | 8160534  | 8165041 -  | 6  | 2014 | 5.17 |
| LOC_Os12g32470.1 | expressed protein                                                                               | Chr12 | 19596995 | 19602217 + | 8  | 2249 | 5.17 |
| LOC_Os02g51080.1 | FAD binding domain containing protein, expressed                                                | Chr2  | 31246225 | 31248818 + | 3  | 1941 | 5.17 |
| LOC_Os04g48050.1 | RING zinc finger protein, putative, expressed                                                   | Chr4  | 28591949 | 28595747 - | 5  | 1925 | 5.17 |
| LOC_Os11g10480.1 | dehydrogenase, putative, expressed                                                              | Chr11 | 5712641  | 5716288 -  | 10 | 2217 | 5.17 |
| LOC_Os07g12330.3 | tryptophan/tyrosine permease family protein, putative, expressed                                | Chr7  | 6954563  | 6958006 +  | 2  | 2034 | 5.17 |
| LOC_Os07g23110.1 | poly synthetase 1, putative, expressed                                                          | Chr7  | 13026440 | 13037161 + | 20 | 3976 | 5.17 |
| LOC_Os11g11950.1 | disease resistance protein RPM1, putative, expressed                                            | Chr11 | 6631958  | 6634662 -  | 3  | 2421 | 5.17 |
| LOC_Os04g49954.1 | expressed protein                                                                               | Chr4  | 29798220 | 29801756 + | 2  | 754  | 5.17 |
| LOC_Os07g37760.2 | lysine ketoglutarate reductase trans-splicing related 1, putative, expressed                    | Chr7  | 22648343 | 22654350 - | 15 | 2114 | 5.17 |
| LOC_Os04g49610.2 | expressed protein                                                                               | Chr4  | 29583835 | 29585675 - | 5  | 1191 | 5.17 |
| LOC_Os09g24640.1 | pentatricopeptide, putative, expressed                                                          | Chr9  | 14666229 | 14667809 + | 1  | 1613 | 5.17 |
| LOC_Os06g02100.1 | OsFBX181 - F-box domain containing protein, expressed                                           | Chr6  | 623462   | 626095 -   | 2  | 1804 | 5.17 |
| LOC_Os03g31180.2 | diacylglycerol kinase 1, putative, expressed                                                    | Chr3  | 17754817 | 17761094 + | 7  | 3833 | 5.18 |
| LOC_Os06g05250.1 | GTP-binding protein GUF1, putative, expressed                                                   | Chr6  | 2366602  | 2372121 -  | 12 | 2964 | 5.18 |
| LOC_Os01g68240.1 | expressed protein                                                                               | Chr1  | 39657943 | 39660633 + | 3  | 546  | 5.18 |
| LOC_Os09g25570.1 | aspartic proteinase, putative, expressed                                                        | Chr9  | 15344637 | 15347123 + | 2  | 1961 | 5.18 |
| LOC_Os01g65440.1 | universal stress protein domain containing protein, putative, expressed                         | Chr1  | 37982849 | 37985710 + | 3  | 1179 | 5.18 |

|                  |                                                                              |       |          |            |    |      |      |
|------------------|------------------------------------------------------------------------------|-------|----------|------------|----|------|------|
| LOC_Os01g57410.1 | pentatricopeptide repeat domain containing protein, putative, expressed      | Chr1  | 33182589 | 33186141 + | 3  | 2696 | 5.18 |
| LOC_Os12g37740.1 | resistance protein LR10, putative, expressed                                 | Chr12 | 23167074 | 23171951 - | 3  | 3519 | 5.18 |
| LOC_Os01g33764.1 | expressed protein                                                            | Chr1  | 18587725 | 18588823 - | 3  | 561  | 5.18 |
| LOC_Os02g57870.1 | expressed protein                                                            | Chr2  | 35433662 | 35435868 - | 4  | 1879 | 5.18 |
| LOC_Os01g70300.1 | aspartokinase 3, chloroplast precursor, putative, expressed                  | Chr1  | 40708640 | 40712960 - | 13 | 2471 | 5.18 |
| LOC_Os09g39474.1 | expressed protein                                                            | Chr9  | 22688076 | 22689610 + | 3  | 893  | 5.18 |
| LOC_Os11g10400.1 | OsFBX419 - F-box domain containing protein, expressed                        | Chr11 | 5645601  | 5648416 -  | 4  | 2000 | 5.18 |
| LOC_Os01g57440.1 | DNA repair metallo-beta-lactamase, putative, expressed                       | Chr1  | 33195328 | 33197885 - | 4  | 1478 | 5.18 |
| LOC_Os09g38690.2 | transporter family protein, putative, expressed                              | Chr9  | 22239399 | 22243494 + | 6  | 2039 | 5.19 |
| LOC_Os03g36480.1 | retrotransposon protein, putative, Ty3-gypsy subclass, expressed             | Chr3  | 20204904 | 20206947 - | 3  | 1224 | 5.19 |
| LOC_Os07g30150.1 | phosphoribosyl transferase, putative, expressed                              | Chr7  | 17787745 | 17801445 - | 6  | 1372 | 5.19 |
| LOC_Os12g43840.1 | ankyrin repeat domain-containing protein, putative, expressed                | Chr12 | 27213496 | 27219059 - | 12 | 2227 | 5.19 |
| LOC_Os05g49040.1 | expressed protein                                                            | Chr5  | 28122980 | 28124806 + | 4  | 1644 | 5.19 |
| LOC_Os11g13420.3 | RNA binding protein, putative, expressed                                     | Chr11 | 7346265  | 7348297 -  | 6  | 1248 | 5.19 |
| LOC_Os07g37760.1 | lysine ketoglutarate reductase trans-splicing related 1, putative, expressed | Chr7  | 22648343 | 22654350 - | 16 | 2246 | 5.19 |
| LOC_Os06g36150.1 | retrotransposon, putative, centromere-specific, expressed                    | Chr6  | 21157841 | 21158453 + | 1  | 645  | 5.19 |
| LOC_Os08g09920.2 | OsFBX277 - F-box domain containing protein, expressed                        | Chr8  | 5728025  | 5729689 +  | 1  | 1697 | 5.19 |
| LOC_Os08g41500.1 | ubiquitin-associated protein, putative, expressed                            | Chr8  | 26214402 | 26219244 + | 12 | 1732 | 5.19 |
| LOC_Os09g38690.4 | transporter family protein, putative, expressed                              | Chr9  | 22239440 | 22243486 + | 6  | 2068 | 5.19 |
| LOC_Os09g38690.3 | transporter family protein, putative, expressed                              | Chr9  | 22239440 | 22243494 + | 6  | 2057 | 5.19 |
| LOC_Os09g38690.1 | transporter family protein, putative, expressed                              | Chr9  | 22239440 | 22243494 + | 6  | 2053 | 5.19 |
| LOC_Os02g02590.1 | PPR repeat domain containing protein, putative, expressed                    | Chr2  | 938314   | 941308 -   | 2  | 2003 | 5.19 |
| LOC_Os04g44710.2 | double-stranded RNA binding motif containing protein, expressed              | Chr4  | 26484115 | 26494586 + | 18 | 4129 | 5.19 |
| LOC_Os01g70300.2 | aspartokinase 3, chloroplast precursor, putative, expressed                  | Chr1  | 40708640 | 40712960 - | 12 | 2524 | 5.19 |
| LOC_Os09g30210.1 | expressed protein                                                            | Chr9  | 18387472 | 18391685 + | 3  | 2201 | 5.20 |
| LOC_Os03g55330.1 | ankyrin repeat domain containing protein, putative, expressed                | Chr3  | 31476238 | 31480062 - | 2  | 1559 | 5.20 |
| LOC_Os05g23960.1 | pentatricopeptide, putative, expressed                                       | Chr5  | 13795200 | 13798252 - | 3  | 2655 | 5.20 |
| LOC_Os07g39980.1 | GA22009-PA, putative, expressed                                              | Chr7  | 23985274 | 23989956 + | 7  | 1759 | 5.20 |
| LOC_Os06g02120.2 | PPR repeat domain containing protein, putative, expressed                    | Chr6  | 631190   | 633783 -   | 3  | 2403 | 5.20 |
| LOC_Os06g03514.1 | expressed protein                                                            | Chr6  | 1356118  | 1359046 +  | 2  | 658  | 5.20 |
| LOC_Os12g02790.1 | expressed protein                                                            | Chr12 | 986410   | 987157 +   | 1  | 780  | 5.20 |
| LOC_Os01g50930.2 | expressed protein                                                            | Chr1  | 29240064 | 29246877 - | 3  | 943  | 5.20 |
| LOC_Os10g40060.4 | protein kinase, putative, expressed                                          | Chr10 | 21454034 | 21459741 - | 8  | 2640 | 5.20 |
| LOC_Os12g43840.2 | ankyrin repeat domain-containing protein, putative, expressed                | Chr12 | 27213378 | 27219059 - | 13 | 2292 | 5.20 |
| LOC_Os04g57020.1 | expressed protein                                                            | Chr4  | 33986389 | 33989932 + | 8  | 1934 | 5.20 |
| LOC_Os04g57020.3 | expressed protein                                                            | Chr4  | 33986389 | 33989932 + | 7  | 2020 | 5.20 |
| LOC_Os02g57080.2 | serine/threonine-protein kinase, putative, expressed                         | Chr2  | 34944973 | 34952003 - | 8  | 2997 | 5.20 |
| LOC_Os04g57020.2 | expressed protein                                                            | Chr4  | 33986389 | 33989694 + | 7  | 1764 | 5.20 |
| LOC_Os12g41210.1 | tesmin/TSO1-like CXC domain containing protein, expressed                    | Chr12 | 25553542 | 25557389 - | 6  | 1669 | 5.20 |
| LOC_Os04g45960.1 | OsSub42 - Putative Subtilisin homologue, expressed                           | Chr4  | 27222615 | 27226399 + | 8  | 3225 | 5.20 |
| LOC_Os05g19974.1 | endonuclease/exonuclease/phosphatase family protein, putative, expressed     | Chr5  | 11671479 | 11681136 + | 7  | 1736 | 5.20 |
| LOC_Os05g44590.3 | ATP-dependent protease La, putative, expressed                               | Chr5  | 25942435 | 25947920 + | 10 | 2437 | 5.21 |
| LOC_Os05g44590.4 | ATP-dependent protease La, putative, expressed                               | Chr5  | 25942431 | 25947920 + | 10 | 2353 | 5.21 |
| LOC_Os01g05670.1 | 3-oxo-5-alpha-steroid 4-dehydrogenase, putative, expressed                   | Chr1  | 2707498  | 2711428 -  | 4  | 1571 | 5.21 |
| LOC_Os11g20689.1 | exosome complex exonuclease, putative, expressed                             | Chr11 | 11980473 | 11988054 + | 7  | 1543 | 5.21 |

|                  |                                                                            |       |          |            |    |      |      |
|------------------|----------------------------------------------------------------------------|-------|----------|------------|----|------|------|
| LOC_Os06g05640.1 | expressed protein                                                          | Chr6  | 2551069  | 2554991 -  | 5  | 2014 | 5.21 |
| LOC_Os10g40060.1 | protein kinase, putative, expressed                                        | Chr10 | 21454034 | 21459779 - | 8  | 2718 | 5.21 |
| LOC_Os01g72090.1 | phycoerythrobilin ferredoxin oxidoreductase, putative, expressed           | Chr1  | 41822269 | 41825087 - | 8  | 1475 | 5.21 |
| LOC_Os05g19974.2 | endonuclease/exonuclease/phosphatase family protein, putative, expressed   | Chr5  | 11671479 | 11681136 + | 7  | 1736 | 5.21 |
| LOC_Os03g13560.1 | hydroxyproline-rich glycoprotein family protein, putative, expressed       | Chr3  | 7329103  | 7335053 -  | 8  | 3104 | 5.21 |
| LOC_Os04g44710.1 | double-stranded RNA binding motif containing protein, expressed            | Chr4  | 26484115 | 26494586 + | 17 | 4212 | 5.21 |
| LOC_Os04g32310.1 | serine/threonine-protein kinase NAK, putative, expressed                   | Chr4  | 19365855 | 19371154 + | 5  | 2237 | 5.21 |
| LOC_Os02g02810.1 | expressed protein                                                          | Chr2  | 1069017  | 1072090 -  | 7  | 1394 | 5.21 |
| LOC_Os01g59340.3 | dihydropyrimidinase, putative, expressed                                   | Chr1  | 34295651 | 34307049 + | 17 | 3446 | 5.21 |
| LOC_Os01g68030.1 | expressed protein                                                          | Chr1  | 39549164 | 39550832 - | 2  | 535  | 5.21 |
| LOC_Os05g44380.1 | MPPN domain containing protein, expressed                                  | Chr5  | 25820352 | 25822805 - | 3  | 1789 | 5.21 |
| LOC_Os04g33470.1 | Ser/Thr protein phosphatase family protein, putative, expressed            | Chr4  | 20245221 | 20249961 - | 4  | 1488 | 5.21 |
| LOC_Os04g58690.3 | tRNA-specific adenosine deaminase 1, putative, expressed                   | Chr4  | 34892934 | 34895949 + | 8  | 1806 | 5.21 |
| LOC_Os02g26300.1 | expressed protein                                                          | Chr2  | 15447211 | 15451795 + | 4  | 2651 | 5.21 |
| LOC_Os02g04330.2 | 5-AMP-activated protein kinase beta-1 subunit-related, putative, expressed | Chr2  | 1908973  | 1912809 +  | 10 | 1670 | 5.21 |
| LOC_Os05g44590.2 | ATP-dependent protease La, putative, expressed                             | Chr5  | 25942431 | 25947920 + | 10 | 2453 | 5.22 |
| LOC_Os08g12740.2 | disease resistance protein RGA3, putative, expressed                       | Chr8  | 7545583  | 7551989 -  | 3  | 3159 | 5.22 |
| LOC_Os04g33760.1 | DUF584 domain containing protein, putative, expressed                      | Chr4  | 20443290 | 20444654 + | 1  | 1397 | 5.22 |
| LOC_Os01g56510.2 | periplasmic beta-glucosidase precursor, putative, expressed                | Chr1  | 32580710 | 32586143 - | 12 | 3059 | 5.22 |
| LOC_Os01g56510.5 | periplasmic beta-glucosidase precursor, putative, expressed                | Chr1  | 32580710 | 32586143 - | 11 | 2936 | 5.22 |
| LOC_Os01g56510.3 | periplasmic beta-glucosidase precursor, putative, expressed                | Chr1  | 32580710 | 32586143 - | 11 | 2926 | 5.22 |
| LOC_Os01g56510.4 | periplasmic beta-glucosidase precursor, putative, expressed                | Chr1  | 32580710 | 32586143 - | 11 | 2890 | 5.22 |
| LOC_Os03g63300.1 | NLI interacting factor-like phosphatase, putative, expressed               | Chr3  | 35772622 | 35777460 - | 7  | 2249 | 5.22 |
| LOC_Os01g72090.2 | phycoerythrobilin ferredoxin oxidoreductase, putative, expressed           | Chr1  | 41822269 | 41825087 - | 7  | 1528 | 5.22 |
| LOC_Os02g51540.1 | eukaryotic aspartyl protease domain containing protein, expressed          | Chr2  | 31564796 | 31571963 + | 10 | 3779 | 5.22 |
| LOC_Os12g04590.2 | zinc finger, C3HC4 type domain containing protein, expressed               | Chr12 | 1938983  | 1941122 -  | 3  | 1687 | 5.22 |
| LOC_Os09g32250.2 | DNA repair ATPase-related, putative, expressed                             | Chr9  | 19244915 | 19249815 + | 14 | 2158 | 5.22 |
| LOC_Os01g34930.1 | callose synthase, putative, expressed                                      | Chr1  | 19303350 | 19306036 - | 5  | 2126 | 5.22 |
| LOC_Os11g04990.1 | expressed protein                                                          | Chr11 | 2145222  | 2148114 +  | 7  | 1225 | 5.22 |
| LOC_Os12g04940.1 | splicing factor, putative, expressed                                       | Chr12 | 2128576  | 2135182 -  | 10 | 1931 | 5.22 |
| LOC_Os02g38410.1 | ubiquitin family protein, putative, expressed                              | Chr2  | 23228772 | 23230852 + | 2  | 1083 | 5.22 |
| LOC_Os02g57080.1 | serine/threonine-protein kinase, putative, expressed                       | Chr2  | 34944973 | 34952009 - | 8  | 3465 | 5.22 |
| LOC_Os05g03200.1 | expressed protein                                                          | Chr5  | 1295616  | 1298612 -  | 7  | 1600 | 5.23 |
| LOC_Os06g49450.2 | expressed protein                                                          | Chr6  | 29961036 | 29967295 + | 13 | 2027 | 5.23 |
| LOC_Os06g49450.1 | expressed protein                                                          | Chr6  | 29961036 | 29967295 + | 13 | 2033 | 5.23 |
| LOC_Os01g66440.1 | expressed protein                                                          | Chr1  | 38574115 | 38580107 + | 7  | 1265 | 5.23 |
| LOC_Os06g14470.1 | RNA recognition motif containing protein, putative, expressed              | Chr6  | 8129423  | 8134491 -  | 7  | 1665 | 5.23 |
| LOC_Os01g72350.2 | amidohydrolase, putative, expressed                                        | Chr1  | 41964126 | 41970144 + | 16 | 2890 | 5.23 |
| LOC_Os08g12780.1 | chloroplast envelope membrane protein, putative, expressed                 | Chr8  | 7568532  | 7574295 -  | 10 | 2332 | 5.23 |
| LOC_Os04g58690.2 | tRNA-specific adenosine deaminase 1, putative, expressed                   | Chr4  | 34892934 | 34895949 + | 8  | 1876 | 5.23 |
| LOC_Os04g58690.6 | tRNA-specific adenosine deaminase 1, putative, expressed                   | Chr4  | 34892934 | 34895965 + | 8  | 1953 | 5.23 |
| LOC_Os04g58690.5 | tRNA-specific adenosine deaminase 1, putative, expressed                   | Chr4  | 34892934 | 34895949 + | 6  | 2021 | 5.23 |
| LOC_Os02g57870.2 | expressed protein                                                          | Chr2  | 35433595 | 35435847 - | 3  | 1969 | 5.23 |
| LOC_Os02g04330.1 | 5-AMP-activated protein kinase beta-1 subunit-related, putative, expressed | Chr2  | 1908981  | 1912809 +  | 9  | 1723 | 5.23 |
| LOC_Os06g38980.1 | polyadenylate-binding protein, putative, expressed                         | Chr6  | 23135703 | 23141103 - | 7  | 3345 | 5.23 |

|                  |                                                                                       |       |          |            |    |      |      |
|------------------|---------------------------------------------------------------------------------------|-------|----------|------------|----|------|------|
| LOC_Os03g56670.2 | photosystem I reaction center subunit III, chloroplast precursor, putative, expressed | Chr3  | 32272930 | 32274174 - | 2  | 1197 | 5.23 |
| LOC_Os03g56670.1 | photosystem I reaction center subunit III, chloroplast precursor, putative, expressed | Chr3  | 32272930 | 32274174 - | 2  | 1202 | 5.23 |
| LOC_Os08g01120.1 | sulfate transporter, putative, expressed                                              | Chr8  | 86335    | 88510 +    | 1  | 2208 | 5.23 |
| LOC_Os12g41830.1 | Methyltransferase small domain containing protein, expressed                          | Chr12 | 25911188 | 25914643 - | 4  | 1804 | 5.23 |
| LOC_Os07g12330.1 | tryptophan/tyrosine permease family protein, putative, expressed                      | Chr7  | 6953280  | 6959635 +  | 5  | 3011 | 5.23 |
| LOC_Os04g58030.1 | expressed protein                                                                     | Chr4  | 34564384 | 34566060 - | 3  | 1573 | 5.23 |
| LOC_Os09g34120.1 | expressed protein                                                                     | Chr9  | 20145579 | 20146567 + | 2  | 968  | 5.23 |
| LOC_Os02g01350.1 | expressed protein                                                                     | Chr2  | 187478   | 192123 -   | 6  | 2655 | 5.23 |
| LOC_Os06g51400.3 | expressed protein                                                                     | Chr6  | 31132833 | 31136051 + | 6  | 1620 | 5.23 |
| LOC_Os01g72350.1 | amidohydrolase, putative, expressed                                                   | Chr1  | 41964126 | 41970144 + | 16 | 2930 | 5.24 |
| LOC_Os06g45820.3 | OsFtsH2 FtsH protease, homologue of AtFtsH2/8, expressed                              | Chr6  | 27724577 | 27728259 - | 5  | 2551 | 5.24 |
| LOC_Os07g19070.1 | prefoldin, putative, expressed                                                        | Chr7  | 11287871 | 11292049 - | 3  | 1340 | 5.24 |
| LOC_Os08g12740.1 | disease resistance protein RGA3, putative, expressed                                  | Chr8  | 7539941  | 7551975 -  | 5  | 3424 | 5.24 |
| LOC_Os08g30370.1 | expressed protein                                                                     | Chr8  | 18685902 | 18686547 - | 1  | 678  | 5.24 |
| LOC_Os10g33700.2 | PPR repeat containing protein, expressed                                              | Chr10 | 17773192 | 17776920 - | 3  | 2822 | 5.24 |
| LOC_Os10g33700.1 | PPR repeat containing protein, expressed                                              | Chr10 | 17773192 | 17776920 - | 2  | 2866 | 5.24 |
| LOC_Os08g33540.2 | ATP-dependent Clp protease adaptor protein ClpS containing protein, expressed         | Chr8  | 20945056 | 20947376 - | 3  | 928  | 5.24 |
| LOC_Os08g05710.1 | ABC transporter, ATP-binding protein, putative, expressed                             | Chr8  | 3061866  | 3067858 +  | 10 | 4049 | 5.24 |
| LOC_Os07g05190.1 | leucine-rich repeat family protein, putative, expressed                               | Chr7  | 2313396  | 2319009 -  | 4  | 4258 | 5.24 |
| LOC_Os06g01810.1 | expressed protein                                                                     | Chr6  | 465680   | 468425 -   | 5  | 1428 | 5.24 |
| LOC_Os05g47830.1 | expressed protein                                                                     | Chr5  | 27417896 | 27419073 + | 3  | 1091 | 5.24 |
| LOC_Os11g03780.1 | alpha-N-arabinofuranosidase, putative, expressed                                      | Chr11 | 1484073  | 1492358 +  | 18 | 3591 | 5.24 |
| LOC_Os01g15490.3 | phosphoadenosine phosphosulfate, putative, expressed                                  | Chr1  | 8702510  | 8708630 -  | 13 | 2413 | 5.24 |
| LOC_Os04g52850.1 | OTU-like cysteine protease family protein, putative, expressed                        | Chr4  | 31474374 | 31477433 + | 2  | 1512 | 5.24 |
| LOC_Os06g14530.1 | expressed protein                                                                     | Chr6  | 8176676  | 8177827 +  | 2  | 1120 | 5.24 |
| LOC_Os03g24890.2 | RNA recognition motif containing protein, putative, expressed                         | Chr3  | 14176397 | 14179394 + | 5  | 1117 | 5.24 |
| LOC_Os01g10830.1 | carnitine racemase like protein, putative, expressed                                  | Chr1  | 5773300  | 5774192 +  | 1  | 925  | 5.24 |
| LOC_Os09g02360.1 | cyclin, putative, expressed                                                           | Chr9  | 969662   | 971670 -   | 3  | 1931 | 5.24 |
| LOC_Os09g23084.1 | endoglucanase, putative, expressed                                                    | Chr9  | 13631678 | 13640847 - | 3  | 2376 | 5.25 |
| LOC_Os06g45820.2 | OsFtsH2 FtsH protease, homologue of AtFtsH2/8, expressed                              | Chr6  | 27724565 | 27728316 - | 6  | 2309 | 5.25 |
| LOC_Os01g52730.1 | DUF584 domain containing protein, putative, expressed                                 | Chr1  | 30322749 | 30325085 - | 1  | 2369 | 5.25 |
| LOC_Os02g51100.1 | arsenical pump-driving ATPase, putative, expressed                                    | Chr2  | 31252558 | 31255964 - | 10 | 2021 | 5.25 |
| LOC_Os02g03720.1 | expressed protein                                                                     | Chr2  | 1560693  | 1563343 +  | 7  | 1608 | 5.25 |
| LOC_Os04g47670.2 | expressed protein                                                                     | Chr4  | 28284070 | 28285205 + | 3  | 885  | 5.25 |
| LOC_Os09g24490.1 | basic helix-loop-helix family protein, putative, expressed                            | Chr9  | 14583473 | 14586345 - | 2  | 1653 | 5.25 |
| LOC_Os07g46490.1 | phosphatidylinositol-4-phosphate 5-kinase, putative, expressed                        | Chr7  | 27752721 | 27757305 - | 8  | 3463 | 5.25 |
| LOC_Os03g02450.2 | pyridoxamine 5%27-phosphate oxidase family protein, putative, expressed               | Chr3  | 878838   | 880702 +   | 7  | 1147 | 5.25 |
| LOC_Os08g06885.1 | expressed protein                                                                     | Chr8  | 3844468  | 3845152 +  | 1  | 717  | 5.25 |
| LOC_Os02g07210.1 | OTU-like cysteine protease family protein, putative, expressed                        | Chr2  | 3705886  | 3709904 -  | 10 | 1425 | 5.25 |
| LOC_Os02g07210.2 | OTU-like cysteine protease family protein, putative, expressed                        | Chr2  | 3705886  | 3709904 -  | 10 | 1453 | 5.25 |
| LOC_Os02g07210.3 | OTU-like cysteine protease family protein, putative, expressed                        | Chr2  | 3705886  | 3709904 -  | 10 | 1454 | 5.25 |
| LOC_Os02g07210.4 | OTU-like cysteine protease family protein, putative, expressed                        | Chr2  | 3705886  | 3709904 -  | 10 | 1482 | 5.25 |
| LOC_Os08g42290.1 | expressed protein                                                                     | Chr8  | 26696844 | 26699355 + | 5  | 996  | 5.25 |
| LOC_Os06g03200.1 | expressed protein                                                                     | Chr6  | 1206453  | 1208951 -  | 6  | 693  | 5.25 |
| LOC_Os02g45770.1 | OsMADS6 - MADS-box family gene with MIKCC type-box, expressed                         | Chr2  | 27875979 | 27884079 + | 8  | 1522 | 5.25 |



|                  |                                                                                  |       |          |            |    |      |      |
|------------------|----------------------------------------------------------------------------------|-------|----------|------------|----|------|------|
| LOC_Os04g39100.1 | peroxidase precursor, putative, expressed                                        | Chr4  | 23235806 | 23237196 - | 1  | 1423 | 5.25 |
| LOC_Os02g05600.1 | expressed protein                                                                | Chr2  | 2722136  | 2725218 +  | 4  | 1842 | 5.25 |
| LOC_Os02g14290.2 | scramblase, putative, expressed                                                  | Chr2  | 7845989  | 7852177 -  | 10 | 1388 | 5.25 |
| LOC_Os02g40900.1 | RNA recognition motif containing protein, putative, expressed                    | Chr2  | 24783195 | 24786565 - | 6  | 1459 | 5.25 |
| LOC_Os08g10620.1 | expressed protein                                                                | Chr8  | 6255910  | 6258099 +  | 3  | 705  | 5.25 |
| LOC_Os06g15550.1 | ubiquitin carboxyl-terminal hydrolase, family 1, putative, expressed             | Chr6  | 8821962  | 8823143 +  | 1  | 1214 | 5.25 |
| LOC_Os08g27580.4 | expressed protein                                                                | Chr8  | 16811699 | 16814094 + | 4  | 1592 | 5.25 |
| LOC_Os01g24940.1 | poly synthetase 2-A, putative, expressed                                         | Chr1  | 14047801 | 14054910 + | 18 | 2902 | 5.25 |
| LOC_Os12g35630.1 | elongation factor TS family protein, expressed                                   | Chr12 | 21660651 | 21666897 + | 4  | 4640 | 5.25 |
| LOC_Os02g55920.1 | expressed protein                                                                | Chr2  | 34229961 | 34231496 - | 1  | 1568 | 5.25 |
| LOC_Os06g45820.4 | OsFtsH2 FtsH protease, homologue of AtFtsH2/8, expressed                         | Chr6  | 27724577 | 27728259 - | 5  | 2621 | 5.25 |
| LOC_Os06g45820.1 | OsFtsH2 FtsH protease, homologue of AtFtsH2/8, expressed                         | Chr6  | 27724565 | 27728316 - | 5  | 2694 | 5.25 |
| LOC_Os03g13750.1 | erwinia induced protein 2, putative, expressed                                   | Chr3  | 7445990  | 7449611 -  | 5  | 1071 | 5.25 |
| LOC_Os04g47130.1 | expressed protein                                                                | Chr4  | 27990856 | 27992387 - | 2  | 959  | 5.25 |
| LOC_Os11g24630.1 | magnesium-dependent phosphatase 1, putative, expressed                           | Chr11 | 14048521 | 14052484 - | 4  | 1031 | 5.25 |
| LOC_Os04g49130.1 | ubiquitin-conjugating enzyme, putative, expressed                                | Chr4  | 29289184 | 29292229 - | 5  | 1074 | 5.25 |
| LOC_Os04g49130.2 | ubiquitin-conjugating enzyme, putative, expressed                                | Chr4  | 29289185 | 29292229 - | 5  | 1114 | 5.25 |
| LOC_Os10g06610.1 | expressed protein                                                                | Chr10 | 3424100  | 3432510 +  | 7  | 3184 | 5.26 |
| LOC_Os08g09950.2 | acyl-desaturase, chloroplast precursor, putative, expressed                      | Chr8  | 5751422  | 5753747 -  | 2  | 2075 | 5.26 |
| LOC_Os09g35980.1 | expressed protein                                                                | Chr9  | 20731589 | 20734724 - | 2  | 3033 | 5.26 |
| LOC_Os08g38740.1 | glycosyl transferase 8 domain containing protein, putative, expressed            | Chr8  | 24495188 | 24499079 + | 9  | 2784 | 5.26 |
| LOC_Os09g06560.1 | WD domain, G-beta repeat domain containing protein, expressed                    | Chr9  | 3118920  | 3125244 +  | 12 | 4682 | 5.26 |
| LOC_Os02g22290.1 | retrotransposon protein, putative, Ty3-gypsy subclass, expressed                 | Chr2  | 13318073 | 13323010 + | 3  | 1074 | 5.26 |
| LOC_Os09g15340.1 | hydrolase, NUDIX family, domain containing protein, expressed                    | Chr9  | 9379745  | 9383838 -  | 9  | 1724 | 5.26 |
| LOC_Os08g02140.2 | STIP1 homology and U box-containing protein 1, putative, expressed               | Chr8  | 715589   | 720171 +   | 7  | 1517 | 5.26 |
| LOC_Os09g37570.1 | OsFBX340 - F-box domain containing protein, expressed                            | Chr9  | 21653048 | 21655333 + | 3  | 1807 | 5.26 |
| LOC_Os11g10434.1 | expressed protein                                                                | Chr11 | 5680101  | 5684035 -  | 4  | 1853 | 5.26 |
| LOC_Os08g12780.4 | chloroplast envelope membrane protein, putative, expressed                       | Chr8  | 7568532  | 7573950 -  | 9  | 2506 | 5.26 |
| LOC_Os12g14140.1 | expressed protein                                                                | Chr12 | 8025152  | 8027413 +  | 1  | 2294 | 5.26 |
| LOC_Os01g51890.1 | endonuclease/exonuclease/phosphatase family domain containing protein, expressed | Chr1  | 29830122 | 29836238 + | 10 | 3007 | 5.26 |
| LOC_Os10g11022.1 | expressed protein                                                                | Chr10 | 6098673  | 6099210 -  | 1  | 570  | 5.26 |
| LOC_Os03g51550.1 | WD repeat-containing protein 5, putative, expressed                              | Chr3  | 29486017 | 29490549 + | 3  | 1507 | 5.26 |
| LOC_Os01g02170.1 | expressed protein                                                                | Chr1  | 635325   | 639309 -   | 1  | 4017 | 5.26 |
| LOC_Os07g38930.5 | glucan endo-1,3-beta-glucosidase precursor, putative, expressed                  | Chr7  | 23344858 | 23348726 + | 5  | 2231 | 5.26 |
| LOC_Os12g19530.1 | ATP-binding region, ATPase-like domain-containing protein, putative, expressed   | Chr12 | 11349808 | 11357236 + | 10 | 2642 | 5.26 |
| LOC_Os08g02140.3 | STIP1 homology and U box-containing protein 1, putative, expressed               | Chr8  | 715589   | 720189 +   | 6  | 1588 | 5.26 |
| LOC_Os05g08010.1 | OsFBX161 - F-box domain containing protein, expressed                            | Chr5  | 4329718  | 4331343 -  | 2  | 1609 | 5.26 |
| LOC_Os02g44102.1 | remorin C-terminal domain containing protein, putative, expressed                | Chr2  | 26625020 | 26627870 - | 6  | 1881 | 5.27 |
| LOC_Os09g37710.1 | NIN, putative, expressed                                                         | Chr9  | 21735440 | 21740633 + | 5  | 3681 | 5.27 |
| LOC_Os08g20420.1 | MGD2, putative, expressed                                                        | Chr8  | 12266091 | 12269671 + | 8  | 1752 | 5.27 |
| LOC_Os05g43690.1 | glucan endo-1,3-beta-glucosidase-like protein 3 precursor, putative, expressed   | Chr5  | 25399241 | 25401867 + | 3  | 1593 | 5.27 |
| LOC_Os04g47270.1 | amine oxidase, putative, expressed                                               | Chr4  | 28067096 | 28070371 - | 2  | 3014 | 5.27 |
| LOC_Os02g14290.1 | scramblase, putative, expressed                                                  | Chr2  | 7845554  | 7852177 -  | 11 | 1723 | 5.27 |
| LOC_Os06g37440.1 | elongation factor 1-gamma, putative, expressed                                   | Chr6  | 22135546 | 22139442 - | 8  | 2087 | 5.27 |
| LOC_Os09g37710.2 | NIN, putative, expressed                                                         | Chr9  | 21735485 | 21740632 + | 6  | 3769 | 5.27 |

|                  |                                                                                    |       |          |            |    |      |      |
|------------------|------------------------------------------------------------------------------------|-------|----------|------------|----|------|------|
| LOC_Os03g55920.1 | hydrolase, acting on carbon-nitrogen, putative, expressed                          | Chr3  | 31840138 | 31844491 - | 6  | 2250 | 5.27 |
| LOC_Os11g40390.1 | expressed protein                                                                  | Chr11 | 24077702 | 24082156 - | 2  | 4291 | 5.27 |
| LOC_Os07g08050.1 | expressed protein                                                                  | Chr7  | 4077504  | 4085522 +  | 14 | 3797 | 5.27 |
| LOC_Os04g20474.4 | UDP-glucuronosyl and UDP-glucosyl transferase domain containing protein, expressed | Chr4  | 11450567 | 11455776 + | 2  | 4149 | 5.27 |
| LOC_Os08g03880.1 | retrotransposon protein, putative, unclassified, expressed                         | Chr8  | 1848413  | 1853016 +  | 1  | 4636 | 5.27 |
| LOC_Os03g43750.1 | retrotransposon, putative, centromere-specific, expressed                          | Chr3  | 24466603 | 24473610 + | 3  | 2909 | 5.27 |
| LOC_Os07g14650.2 | expressed protein                                                                  | Chr7  | 8352084  | 8354955 +  | 3  | 1180 | 5.28 |
| LOC_Os07g14650.1 | expressed protein                                                                  | Chr7  | 8352084  | 8354955 +  | 2  | 1048 | 5.28 |
| LOC_Os06g02120.3 | PPR repeat domain containing protein, putative, expressed                          | Chr6  | 630809   | 633783 -   | 5  | 2650 | 5.28 |
| LOC_Os01g01970.2 | expressed protein                                                                  | Chr1  | 524579   | 528002 -   | 4  | 1217 | 5.28 |
| LOC_Os01g01970.1 | expressed protein                                                                  | Chr1  | 524579   | 527952 -   | 4  | 1279 | 5.28 |
| LOC_Os01g34610.2 | expressed protein                                                                  | Chr1  | 19079248 | 19082074 + | 4  | 1419 | 5.28 |
| LOC_Os01g55860.1 | expressed protein                                                                  | Chr1  | 32167881 | 32171343 + | 7  | 1960 | 5.28 |
| LOC_Os02g47180.2 | WD repeat-containing protein, putative, expressed                                  | Chr2  | 28802793 | 28805992 + | 7  | 2821 | 5.28 |
| LOC_Os02g47180.1 | WD repeat-containing protein, putative, expressed                                  | Chr2  | 28802793 | 28805992 + | 7  | 2879 | 5.28 |
| LOC_Os09g31380.1 | jmjC domain-containing protein 5, putative, expressed                              | Chr9  | 18863285 | 18867497 - | 7  | 1421 | 5.28 |
| LOC_Os10g40700.1 | expansin precursor, putative, expressed                                            | Chr10 | 21830151 | 21831694 - | 3  | 1364 | 5.28 |
| LOC_Os12g31820.1 | phosphoserine phosphatase, chloroplast precursor, putative, expressed              | Chr12 | 19147384 | 19150955 - | 8  | 1608 | 5.28 |
| LOC_Os05g19380.1 | pentatricopeptide, putative, expressed                                             | Chr5  | 11253553 | 11256636 - | 1  | 3116 | 5.28 |
| LOC_Os11g12650.1 | PHD-finger domain containing protein, putative, expressed                          | Chr11 | 7125124  | 7128857 -  | 5  | 2483 | 5.28 |
| LOC_Os07g37230.1 | inositol-1-monophosphatase, putative, expressed                                    | Chr7  | 22309414 | 22313591 - | 9  | 1864 | 5.28 |
| LOC_Os03g01230.2 | DNA-directed RNA polymerase II subunit RPB9, putative, expressed                   | Chr3  | 148181   | 149057 +   | 3  | 829  | 5.28 |
| LOC_Os03g01230.1 | DNA-directed RNA polymerase II subunit RPB9, putative, expressed                   | Chr3  | 148183   | 149057 +   | 2  | 861  | 5.28 |
| LOC_Os03g31310.3 | circadian clock coupling factor-related, putative, expressed                       | Chr3  | 17842093 | 17844363 - | 3  | 1519 | 5.28 |
| LOC_Os01g53450.1 | aminotransferase, classes I and II, domain containing protein, expressed           | Chr1  | 30714010 | 30717688 + | 11 | 2053 | 5.28 |
| LOC_Os06g02200.1 | pentatricopeptide, putative, expressed                                             | Chr6  | 676126   | 678878 +   | 2  | 2706 | 5.28 |
| LOC_Os08g27580.5 | expressed protein                                                                  | Chr8  | 16811699 | 16814183 + | 3  | 1731 | 5.28 |
| LOC_Os05g02040.1 | RPA1C - Putative single-stranded DNA binding complex subunit 1, expressed          | Chr5  | 593356   | 598068 +   | 2  | 3473 | 5.28 |
| LOC_Os09g38100.1 | phosphate carrier protein, mitochondrial precursor, putative, expressed            | Chr9  | 21949091 | 21952517 - | 6  | 1861 | 5.29 |
| LOC_Os11g40200.1 | expressed protein                                                                  | Chr11 | 23976787 | 23979856 + | 2  | 1409 | 5.29 |
| LOC_Os02g38790.1 | expressed protein                                                                  | Chr2  | 23444066 | 23448837 - | 6  | 1608 | 5.29 |
| LOC_Os08g04810.1 | serine esterase family protein, putative, expressed                                | Chr8  | 2412054  | 2418681 -  | 10 | 2088 | 5.29 |
| LOC_Os08g05830.1 | transaldolase, putative, expressed                                                 | Chr8  | 3128285  | 3132239 -  | 13 | 2117 | 5.29 |
| LOC_Os02g47000.1 | expressed protein                                                                  | Chr2  | 28694688 | 28696453 - | 3  | 959  | 5.29 |
| LOC_Os07g10110.1 | expressed protein                                                                  | Chr7  | 5418766  | 5426572 -  | 7  | 3192 | 5.29 |
| LOC_Os07g37250.1 | THYLAKOID FORMATION1, chloroplast precursor, putative, expressed                   | Chr7  | 22319007 | 22323191 - | 5  | 1507 | 5.29 |
| LOC_Os07g42170.1 | 60S ribosomal protein, putative, expressed                                         | Chr7  | 25236661 | 25237462 - | 1  | 834  | 5.29 |
| LOC_Os07g41080.1 | hydrolase, alpha/beta fold family domain containing protein, expressed             | Chr7  | 24575162 | 24584259 - | 15 | 2583 | 5.29 |
| LOC_Os06g08110.1 | nodulin, putative, expressed                                                       | Chr6  | 3934027  | 3937229 -  | 3  | 2220 | 5.29 |
| LOC_Os03g60100.1 | 50S ribosomal protein L17, putative, expressed                                     | Chr3  | 34174773 | 34176702 + | 3  | 1070 | 5.29 |
| LOC_Os06g47930.1 | expressed protein                                                                  | Chr6  | 28988077 | 28990335 - | 3  | 1709 | 5.29 |
| LOC_Os01g01380.1 | expressed protein                                                                  | Chr1  | 191036   | 196287 +   | 6  | 3674 | 5.29 |
| LOC_Os01g02139.1 | expressed protein                                                                  | Chr1  | 624087   | 624613 +   | 1  | 559  | 5.29 |
| LOC_Os12g19530.2 | ATP-binding region, ATPase-like domain-containing protein, putative, expressed     | Chr12 | 11349808 | 11357236 + | 10 | 2727 | 5.29 |
| LOC_Os03g36419.2 | expressed protein                                                                  | Chr3  | 20183314 | 20187928 - | 6  | 1950 | 5.29 |

|                  |                                                                                         |       |          |            |    |      |      |
|------------------|-----------------------------------------------------------------------------------------|-------|----------|------------|----|------|------|
| LOC_Os01g10250.2 | hydrolase, alpha/beta fold family domain containing protein, expressed                  | Chr1  | 5389733  | 5393868 -  | 6  | 2838 | 5.30 |
| LOC_Os04g28040.1 | expressed protein                                                                       | Chr4  | 16553185 | 16559358 + | 10 | 2667 | 5.30 |
| LOC_Os10g22960.1 | hydrolase protein, putative, expressed                                                  | Chr10 | 11947165 | 11951353 + | 5  | 1730 | 5.30 |
| LOC_Os10g22960.2 | hydrolase protein, putative, expressed                                                  | Chr10 | 11947165 | 11951353 + | 5  | 1734 | 5.30 |
| LOC_Os12g04590.1 | zinc finger, C3HC4 type domain containing protein, expressed                            | Chr12 | 1939516  | 1941122 -  | 2  | 1558 | 5.30 |
| LOC_Os02g10780.1 | SPX domain containing protein, putative, expressed                                      | Chr2  | 5706636  | 5709127 +  | 3  | 1391 | 5.30 |
| LOC_Os06g37690.1 | S-locus-like receptor protein kinase, putative, expressed                               | Chr6  | 22331486 | 22333906 + | 1  | 2453 | 5.30 |
| LOC_Os04g25560.1 | OsSCP23 - Putative Serine Carboxypeptidase homologue, expressed                         | Chr4  | 14813270 | 14819280 - | 15 | 2581 | 5.30 |
| LOC_Os07g35610.1 | kelch repeat-containing protein, putative, expressed                                    | Chr7  | 21315434 | 21320392 - | 11 | 2584 | 5.30 |
| LOC_Os04g25560.2 | OsSCP23 - Putative Serine Carboxypeptidase homologue, expressed                         | Chr4  | 14813274 | 14819280 - | 14 | 2786 | 5.30 |
| LOC_Os04g32600.1 | expressed protein                                                                       | Chr4  | 19627290 | 19629858 + | 4  | 885  | 5.30 |
| LOC_Os07g05700.1 | expressed protein                                                                       | Chr7  | 2722024  | 2723459 -  | 3  | 483  | 5.30 |
| LOC_Os03g43910.1 | expressed protein                                                                       | Chr3  | 24638171 | 24641470 - | 3  | 838  | 5.30 |
| LOC_Os07g13969.1 | expressed protein                                                                       | Chr7  | 7982501  | 7983595 +  | 1  | 1127 | 5.30 |
| LOC_Os07g43160.1 | uncharacterized glycosyl hydrolase Rv2006/MT2062, putative, expressed                   | Chr7  | 25867212 | 25871233 + | 11 | 1870 | 5.30 |
| LOC_Os02g51164.1 | expressed protein                                                                       | Chr2  | 31306334 | 31307787 + | 2  | 1309 | 5.30 |
| LOC_Os05g30420.1 | expressed protein                                                                       | Chr5  | 17630980 | 17633380 - | 3  | 1111 | 5.30 |
| LOC_Os01g68200.1 | expressed protein                                                                       | Chr1  | 39638781 | 39641275 + | 5  | 1075 | 5.30 |
| LOC_Os08g07290.2 | HEAT repeat family protein, putative, expressed                                         | Chr8  | 4069808  | 4076114 -  | 4  | 5218 | 5.30 |
| LOC_Os11g07870.1 | DEAD/DEAH box helicase domain containing protein, expressed                             | Chr11 | 4021698  | 4034044 +  | 22 | 5171 | 5.30 |
| LOC_Os01g01030.1 | monocopper oxidase, putative, expressed                                                 | Chr1  | 12648    | 15915 +    | 5  | 2624 | 5.30 |
| LOC_Os05g38640.1 | Core histone H2A/H2B/H3/H4 domain containing protein, putative, expressed               | Chr5  | 22656825 | 22658034 - | 2  | 1198 | 5.30 |
| LOC_Os10g39930.2 | cytochrome P450 97B2, putative, expressed                                               | Chr10 | 21368384 | 21373363 - | 11 | 2421 | 5.30 |
| LOC_Os01g10010.1 | prenylated rab acceptor, putative, expressed                                            | Chr1  | 5213932  | 5216703 -  | 2  | 1186 | 5.30 |
| LOC_Os10g33640.1 | AGC_AGC_other_NDRh_TRCd.3 - ACG kinases include homologs to PKA, PKG and PKC, expressed | Chr10 | 17732596 | 17735799 + | 12 | 1971 | 5.31 |
| LOC_Os08g45040.3 | zinc finger protein 593, putative, expressed                                            | Chr8  | 28272060 | 28273937 - | 2  | 751  | 5.31 |
| LOC_Os10g06710.1 | amidase, putative, expressed                                                            | Chr10 | 3472158  | 3475187 +  | 6  | 1833 | 5.31 |
| LOC_Os06g45380.2 | vacuolar-sorting receptor precursor, putative, expressed                                | Chr6  | 27435593 | 27441148 + | 13 | 2609 | 5.31 |
| LOC_Os04g33970.1 | 2-Cys peroxiredoxin BAS1, chloroplast precursor, putative, expressed                    | Chr4  | 20559966 | 20564907 + | 7  | 1615 | 5.31 |
| LOC_Os01g42140.2 | expressed protein                                                                       | Chr1  | 23886843 | 23888187 - | 2  | 980  | 5.31 |
| LOC_Os01g42140.1 | expressed protein                                                                       | Chr1  | 23886843 | 23888222 - | 1  | 1412 | 5.31 |
| LOC_Os04g49860.1 | DNA2 - Putative DNA replication helicase 2 protein, expressed                           | Chr4  | 29719544 | 29729743 + | 33 | 4920 | 5.31 |
| LOC_Os05g38880.1 | expressed protein                                                                       | Chr5  | 22807363 | 22807937 - | 1  | 607  | 5.31 |
| LOC_Os08g45040.1 | zinc finger protein 593, putative, expressed                                            | Chr8  | 28272060 | 28274506 - | 3  | 1018 | 5.31 |
| LOC_Os08g45040.2 | zinc finger protein 593, putative, expressed                                            | Chr8  | 28272060 | 28274506 - | 3  | 987  | 5.31 |
| LOC_Os11g39209.1 | expressed protein                                                                       | Chr11 | 23346654 | 23348579 + | 1  | 1958 | 5.31 |
| LOC_Os08g41090.1 | peroxidase precursor, putative, expressed                                               | Chr8  | 25971764 | 25974968 - | 11 | 1850 | 5.31 |
| LOC_Os04g59560.1 | tubulin folding cofactor B, putative, expressed                                         | Chr4  | 35422986 | 35426837 - | 8  | 1477 | 5.31 |
| LOC_Os01g47400.2 | OsMan01 - Endo-Beta-Mannanase, expressed                                                | Chr1  | 27081818 | 27085680 + | 5  | 1836 | 5.31 |
| LOC_Os01g47400.1 | OsMan01 - Endo-Beta-Mannanase, expressed                                                | Chr1  | 27081806 | 27085681 + | 4  | 1904 | 5.31 |
| LOC_Os03g11874.1 | expressed protein                                                                       | Chr3  | 6218055  | 6225078 -  | 5  | 1380 | 5.31 |
| LOC_Os05g12380.1 | expressed protein                                                                       | Chr5  | 7123870  | 7127152 +  | 3  | 1446 | 5.31 |
| LOC_Os09g26160.2 | glutamate receptor, putative, expressed                                                 | Chr9  | 15766741 | 15770861 + | 4  | 3128 | 5.31 |
| LOC_Os07g12160.1 | KHG/KDPG aldolase, putative, expressed                                                  | Chr7  | 6803406  | 6806860 +  | 9  | 1983 | 5.31 |
| LOC_Os12g42380.1 | expressed protein                                                                       | Chr12 | 26339462 | 26340045 - | 2  | 532  | 5.31 |

|                  |                                                                                             |       |          |            |    |      |      |
|------------------|---------------------------------------------------------------------------------------------|-------|----------|------------|----|------|------|
| LOC_Os01g17320.1 | PPR repeat domain containing protein, putative, expressed                                   | Chr1  | 9962629  | 9966966 +  | 3  | 2361 | 5.31 |
| LOC_Os01g47620.1 | expressed protein                                                                           | Chr1  | 27243443 | 27246045 - | 3  | 1263 | 5.31 |
| LOC_Os12g12664.2 | expressed protein                                                                           | Chr12 | 6976909  | 6982100 -  | 4  | 3638 | 5.32 |
| LOC_Os01g31610.1 | tyrosyl-tRNA synthetase, putative, expressed                                                | Chr1  | 17301967 | 17303723 + | 1  | 1789 | 5.32 |
| LOC_Os03g51680.2 | fanconi anemia L, putative, expressed                                                       | Chr3  | 29592966 | 29595799 - | 10 | 1778 | 5.32 |
| LOC_Os03g51680.1 | fanconi anemia L, putative, expressed                                                       | Chr3  | 29592966 | 29595799 - | 9  | 1873 | 5.32 |
| LOC_Os02g47000.2 | expressed protein                                                                           | Chr2  | 28694688 | 28696453 - | 2  | 1187 | 5.32 |
| LOC_Os07g28470.1 | coiled-coil domain-containing protein 111, putative, expressed                              | Chr7  | 16660287 | 16669984 + | 16 | 3109 | 5.32 |
| LOC_Os06g46030.1 | DUF640 domain containing protein, putative, expressed                                       | Chr6  | 27904549 | 27906635 - | 2  | 1529 | 5.32 |
| LOC_Os09g36240.1 | deoxyribodipyrimidine photolyase family protein, expressed                                  | Chr9  | 20897579 | 20903515 + | 16 | 3131 | 5.32 |
| LOC_Os07g30220.1 | expressed protein                                                                           | Chr7  | 17851168 | 17854470 - | 5  | 1372 | 5.32 |
| LOC_Os04g20474.3 | UDP-glucuronosyl and UDP-glucosyl transferase domain containing protein, expressed          | Chr4  | 11451370 | 11455776 + | 2  | 3907 | 5.32 |
| LOC_Os04g20474.2 | UDP-glucuronosyl and UDP-glucosyl transferase domain containing protein, expressed          | Chr4  | 11450567 | 11455776 + | 3  | 4277 | 5.32 |
| LOC_Os03g63074.1 | Ser/Thr protein phosphatase family protein, expressed                                       | Chr3  | 35659830 | 35666982 - | 10 | 4209 | 5.32 |
| LOC_Os11g05180.3 | expressed protein                                                                           | Chr11 | 2278748  | 2281615 +  | 4  | 1909 | 5.32 |
| LOC_Os02g51700.1 | expressed protein                                                                           | Chr2  | 31673144 | 31675290 + | 3  | 1112 | 5.32 |
| LOC_Os03g55620.3 | CAMK_CAMK_like_Aur_like.2 - CAMK includes calcium/calmodulin depeudent protein kinases, exp | Chr3  | 31674568 | 31678720 + | 7  | 1763 | 5.32 |
| LOC_Os09g32250.1 | DNA repair ATPase-related, putative, expressed                                              | Chr9  | 19244915 | 19250324 + | 15 | 2384 | 5.32 |
| LOC_Os03g64020.2 | expressed protein                                                                           | Chr3  | 36180582 | 36183152 - | 8  | 1808 | 5.32 |
| LOC_Os08g38610.1 | pentatricopeptide, putative, expressed                                                      | Chr8  | 24402186 | 24406138 + | 5  | 2029 | 5.32 |
| LOC_Os10g34390.1 | expressed protein                                                                           | Chr10 | 18332850 | 18339978 - | 8  | 4513 | 5.32 |
| LOC_Os08g01700.1 | basic helix-loop-helix family protein, putative, expressed                                  | Chr8  | 418808   | 420578 -   | 1  | 1803 | 5.32 |
| LOC_Os01g24140.1 | transposon protein, putative, CACTA, En/Spm sub-class, expressed                            | Chr1  | 13612430 | 13615028 + | 3  | 2406 | 5.32 |
| LOC_Os04g51490.1 | retrotransposon protein, putative, unclassified, expressed                                  | Chr4  | 30499106 | 30503422 - | 11 | 2503 | 5.32 |
| LOC_Os04g20474.1 | UDP-glucuronosyl and UDP-glucosyl transferase domain containing protein, expressed          | Chr4  | 11450567 | 11455777 + | 4  | 4441 | 5.33 |
| LOC_Os09g15800.1 | tetratricopeptide-like helical, putative, expressed                                         | Chr9  | 9647717  | 9650347 -  | 2  | 2332 | 5.33 |
| LOC_Os11g15640.1 | expressed protein                                                                           | Chr11 | 8871823  | 8873938 -  | 3  | 1989 | 5.33 |
| LOC_Os03g10360.1 | SURF1, putative, expressed                                                                  | Chr3  | 5283453  | 5286844 -  | 6  | 1684 | 5.33 |
| LOC_Os01g60330.1 | inactive receptor kinase At2g26730 precursor, putative, expressed                           | Chr1  | 34899156 | 34901733 + | 2  | 2294 | 5.33 |
| LOC_Os01g63710.2 | CDC6 - Putative DNA replication initiation protein, expressed                               | Chr1  | 36952783 | 36956735 + | 16 | 2547 | 5.33 |
| LOC_Os07g36950.1 | expressed protein                                                                           | Chr7  | 22125139 | 22127924 + | 1  | 2818 | 5.33 |
| LOC_Os03g12810.1 | maf, putative, expressed                                                                    | Chr3  | 6871765  | 6875398 -  | 9  | 1294 | 5.33 |
| LOC_Os01g58580.1 | ICE-like protease p20 domain containing protein, putative, expressed                        | Chr1  | 33869142 | 33871840 + | 2  | 1714 | 5.33 |
| LOC_Os08g14660.1 | SET domain containing protein, expressed                                                    | Chr8  | 8811774  | 8816699 -  | 11 | 2763 | 5.33 |
| LOC_Os01g34630.1 | retrotransposon protein, putative, Ty1-copia subclass, expressed                            | Chr1  | 19095517 | 19100157 - | 7  | 2613 | 5.33 |
| LOC_Os03g08640.1 | ORC2 - Putative origin recognition complex subunit 2, expressed                             | Chr3  | 4446710  | 4449163 -  | 7  | 1670 | 5.34 |
| LOC_Os03g08640.2 | ORC2 - Putative origin recognition complex subunit 2, expressed                             | Chr3  | 4446710  | 4449163 -  | 6  | 1713 | 5.34 |
| LOC_Os11g26030.1 | GTPase of unknown function domain containing protein, putative, expressed                   | Chr11 | 14883702 | 14890574 + | 8  | 1820 | 5.34 |
| LOC_Os11g06680.1 | expressed protein                                                                           | Chr11 | 3250276  | 3254508 -  | 4  | 3146 | 5.34 |
| LOC_Os04g31040.3 | violaxanthin de-epoxidase, putative, expressed                                              | Chr4  | 18551243 | 18553801 - | 5  | 2137 | 5.34 |
| LOC_Os04g31040.1 | violaxanthin de-epoxidase, putative, expressed                                              | Chr4  | 18551238 | 18553801 - | 6  | 2069 | 5.34 |
| LOC_Os07g32170.2 | OsSPL13 - SBP-box gene family member, expressed                                             | Chr7  | 19099964 | 19103294 - | 3  | 1262 | 5.34 |
| LOC_Os12g42064.1 | OsWAK129c - OsWAK receptor-like protein kinase, expressed                                   | Chr12 | 26093271 | 26097944 - | 2  | 3033 | 5.34 |
| LOC_Os01g67040.2 | OsRhmbd5 - Putative Rhomboid homologue, expressed                                           | Chr1  | 38928641 | 38930051 + | 2  | 1382 | 5.34 |
| LOC_Os01g67040.1 | OsRhmbd5 - Putative Rhomboid homologue, expressed                                           | Chr1  | 38928602 | 38930270 + | 1  | 1701 | 5.34 |

|                  |                                                                                            |       |          |          |   |    |      |      |
|------------------|--------------------------------------------------------------------------------------------|-------|----------|----------|---|----|------|------|
| LOC_Os05g46200.2 | beta-galactosidase 8 precursor, putative, expressed                                        | Chr5  | 26795517 | 26801505 | - | 16 | 3120 | 5.34 |
| LOC_Os07g12630.1 | transcription elongation factor protein, putative, expressed                               | Chr7  | 7224593  | 7228243  | - | 2  | 1590 | 5.34 |
| LOC_Os02g38490.2 | expressed protein                                                                          | Chr2  | 23272523 | 23273306 | + | 3  | 647  | 5.34 |
| LOC_Os02g38490.3 | expressed protein                                                                          | Chr2  | 23272547 | 23273306 | + | 2  | 717  | 5.34 |
| LOC_Os06g16140.1 | expressed protein                                                                          | Chr6  | 9186472  | 9189863  | + | 1  | 3424 | 5.34 |
| LOC_Os10g41730.1 | expressed protein                                                                          | Chr10 | 22464360 | 22466552 | + | 6  | 1246 | 5.34 |
| LOC_Os05g38270.1 | regulator of chromosome condensation, putative, expressed                                  | Chr5  | 22440563 | 22445332 | - | 11 | 2171 | 5.34 |
| LOC_Os05g38270.2 | regulator of chromosome condensation, putative, expressed                                  | Chr5  | 22440564 | 22445332 | - | 11 | 2155 | 5.34 |
| LOC_Os05g18790.1 | formyl transferase, putative, expressed                                                    | Chr5  | 10914251 | 10916007 | + | 5  | 865  | 5.34 |
| LOC_Os08g23180.1 | fasciclin-like arabinogalactan protein 8 precursor, putative, expressed                    | Chr8  | 13985040 | 13988220 | - | 2  | 2007 | 5.34 |
| LOC_Os12g12380.2 | transposon protein, putative, unclassified, expressed                                      | Chr12 | 6815253  | 6820419  | - | 4  | 3337 | 5.34 |
| LOC_Os09g26999.3 | keratin-associated protein 5-4, putative, expressed                                        | Chr9  | 16412084 | 16415862 | + | 4  | 2251 | 5.34 |
| LOC_Os05g02010.4 | expressed protein                                                                          | Chr5  | 575187   | 576881   | + | 6  | 1237 | 5.34 |
| LOC_Os05g02010.1 | expressed protein                                                                          | Chr5  | 574774   | 576866   | + | 7  | 1428 | 5.34 |
| LOC_Os05g02010.2 | expressed protein                                                                          | Chr5  | 574774   | 576866   | + | 7  | 1433 | 5.34 |
| LOC_Os05g28170.2 | expressed protein                                                                          | Chr5  | 16468040 | 16472774 | - | 2  | 4680 | 5.34 |
| LOC_Os08g19540.1 | retrotransposon protein, putative, unclassified, expressed                                 | Chr8  | 11682363 | 11686428 | - | 3  | 3993 | 5.34 |
| LOC_Os02g51290.2 | HVA22, putative, expressed                                                                 | Chr2  | 31407145 | 31409129 | + | 4  | 900  | 5.35 |
| LOC_Os06g14470.2 | RNA recognition motif containing protein, putative, expressed                              | Chr6  | 8129423  | 8134491  | - | 5  | 2203 | 5.35 |
| LOC_Os09g29825.1 | pentatricopeptide, putative, expressed                                                     | Chr9  | 18135734 | 18136435 | + | 1  | 734  | 5.35 |
| LOC_Os07g07646.1 | expressed protein                                                                          | Chr7  | 3830511  | 3833279  | + | 2  | 1202 | 5.35 |
| LOC_Os05g32850.2 | CBS domain containing protein, expressed                                                   | Chr5  | 19232846 | 19238640 | + | 12 | 2066 | 5.35 |
| LOC_Os07g19030.1 | tic22-like family domain containing protein, expressed                                     | Chr7  | 11268894 | 11273492 | + | 7  | 1326 | 5.35 |
| LOC_Os08g38092.1 | abhydrolase domain-containing protein FAM108C1, putative, expressed                        | Chr8  | 24129928 | 24134716 | - | 6  | 1821 | 5.35 |
| LOC_Os04g32760.1 | retrotransposon protein, putative, unclassified, expressed                                 | Chr4  | 19760808 | 19762008 | + | 1  | 1233 | 5.35 |
| LOC_Os03g55620.2 | CAMK_CAMK_like_Aur_like.2 - CAMK includes calcium/calmodulin depedent protein kinases, exp | Chr3  | 31674568 | 31678720 | + | 8  | 1879 | 5.35 |
| LOC_Os02g01020.2 | expressed protein                                                                          | Chr2  | 10568    | 13896    | - | 3  | 3214 | 5.35 |
| LOC_Os07g32170.1 | OsSPL13 - SBP-box gene family member, expressed                                            | Chr7  | 19099675 | 19103294 | - | 2  | 1707 | 5.35 |
| LOC_Os06g05190.1 | BRCA1 C Terminus domain containing protein, expressed                                      | Chr6  | 2329883  | 2334474  | + | 8  | 1635 | 5.35 |
| LOC_Os02g39990.1 | expressed protein                                                                          | Chr2  | 24178332 | 24181293 | - | 4  | 1404 | 5.35 |
| LOC_Os04g20990.1 | tRNA-dihydrouridine synthase, putative, expressed                                          | Chr4  | 11801164 | 11814990 | - | 12 | 2095 | 5.35 |
| LOC_Os02g38490.1 | expressed protein                                                                          | Chr2  | 23272523 | 23273346 | + | 3  | 682  | 5.35 |
| LOC_Os11g34140.1 | expressed protein                                                                          | Chr11 | 19988429 | 19991058 | - | 2  | 2094 | 5.35 |
| LOC_Os09g39594.1 | expressed protein                                                                          | Chr9  | 22727637 | 22729200 | + | 3  | 851  | 5.35 |
| LOC_Os03g27340.2 | expressed protein                                                                          | Chr3  | 15658785 | 15661409 | - | 6  | 1985 | 5.35 |
| LOC_Os04g58210.1 | N-acetylglucosaminyl-phosphatidylinositol de-N-acetylase, putative, expressed              | Chr4  | 34664936 | 34668707 | + | 9  | 1725 | 5.36 |
| LOC_Os02g45820.1 | mitochondrial import inner membrane translocase subunit Tim, putative, expressed           | Chr2  | 27909552 | 27912067 | - | 2  | 789  | 5.36 |
| LOC_Os01g62850.1 | membrane associated DUF588 domain containing protein, putative, expressed                  | Chr1  | 36398958 | 36401777 | - | 3  | 954  | 5.36 |
| LOC_Os02g12870.5 | expressed protein                                                                          | Chr2  | 6793140  | 6795165  | + | 7  | 1129 | 5.36 |
| LOC_Os01g41030.1 | ribosomal protein L25, putative, expressed                                                 | Chr1  | 23234635 | 23237672 | - | 3  | 1552 | 5.36 |
| LOC_Os01g48020.1 | S-locus-like receptor protein kinase, putative, expressed                                  | Chr1  | 27484134 | 27486470 | - | 1  | 2369 | 5.36 |
| LOC_Os08g05600.1 | aquaporin protein, putative, expressed                                                     | Chr8  | 2997031  | 2998457  | + | 4  | 965  | 5.36 |
| LOC_Os03g50130.1 | microsomal glutathione S-transferase 3, putative, expressed                                | Chr3  | 28594359 | 28596342 | - | 4  | 1059 | 5.36 |
| LOC_Os03g50130.2 | microsomal glutathione S-transferase 3, putative, expressed                                | Chr3  | 28594359 | 28596340 | - | 3  | 1111 | 5.36 |
| LOC_Os12g37580.1 | ABC transporter, ATP-binding protein, putative, expressed                                  | Chr12 | 23071911 | 23077729 | + | 12 | 3900 | 5.36 |

|                  |                                                                                                 |       |          |            |    |      |      |
|------------------|-------------------------------------------------------------------------------------------------|-------|----------|------------|----|------|------|
| LOC_Os12g43130.1 | phytoene synthase, chloroplast precursor, putative, expressed                                   | Chr12 | 26780487 | 26783598 - | 6  | 1710 | 5.36 |
| LOC_Os01g70430.1 | oxidoreductase, short chain dehydrogenase/reductase family domain containing protein, expressed | Chr1  | 40794124 | 40796977 - | 3  | 2356 | 5.36 |
| LOC_Os05g38670.1 | cation efflux family protein, putative, expressed                                               | Chr5  | 22670927 | 22674637 + | 8  | 1513 | 5.36 |
| LOC_Os01g67160.1 | cyclin-dependent kinase B1-1, putative, expressed                                               | Chr1  | 38981302 | 38984078 - | 7  | 1378 | 5.36 |
| LOC_Os02g02550.1 | peptidyl-prolyl cis-trans isomerase, FKBP-type, putative, expressed                             | Chr2  | 924454   | 926632 +   | 7  | 1614 | 5.37 |
| LOC_Os03g03420.1 | expressed protein                                                                               | Chr3  | 1463499  | 1466923 -  | 4  | 855  | 5.37 |
| LOC_Os03g03420.2 | expressed protein                                                                               | Chr3  | 1463499  | 1466923 -  | 3  | 910  | 5.37 |
| LOC_Os08g18770.1 | retrotransposon protein, putative, unclassified, expressed                                      | Chr8  | 11201775 | 11206648 - | 3  | 3405 | 5.37 |
| LOC_Os03g10070.1 | transcription initiation factor IIB, putative, expressed                                        | Chr3  | 5082306  | 5085039 -  | 3  | 2018 | 5.37 |
| LOC_Os10g35940.2 | folylpolyglutamate synthetase, putative, expressed                                              | Chr10 | 19201521 | 19206783 - | 14 | 2910 | 5.37 |
| LOC_Os05g49050.1 | CobW/P47K family protein, putative, expressed                                                   | Chr5  | 28125211 | 28128402 + | 7  | 1769 | 5.37 |
| LOC_Os01g42120.1 | expressed protein                                                                               | Chr1  | 23881900 | 23884206 + | 5  | 785  | 5.37 |
| LOC_Os07g20470.1 | retrotransposon protein, putative, Ty3-gypsy subclass                                           | Chr7  | 11820910 | 11822261 - | 2  | 871  | 5.37 |
| LOC_Os07g01290.1 | transposon protein, putative, unclassified, expressed                                           | Chr7  | 178548   | 181537 +   | 5  | 2620 | 5.37 |
| LOC_Os05g49410.2 | expressed protein                                                                               | Chr5  | 28329371 | 28330711 + | 1  | 1373 | 5.37 |
| LOC_Os06g15620.1 | GASR7 - Gibberellin-regulated GASA/GAST/Snakin family protein precursor, expressed              | Chr6  | 8847702  | 8848847 -  | 2  | 1106 | 5.37 |
| LOC_Os12g29560.1 | DHHC zinc finger domain containing protein, expressed                                           | Chr12 | 17619415 | 17623995 + | 11 | 2075 | 5.37 |
| LOC_Os01g74250.1 | plant-specific domain TIGR01615 family protein, expressed                                       | Chr1  | 43016926 | 43019127 + | 3  | 1660 | 5.37 |
| LOC_Os03g02590.3 | peroxisomal biogenesis factor 11, putative, expressed                                           | Chr3  | 956806   | 960249 -   | 8  | 2751 | 5.37 |
| LOC_Os03g02590.2 | peroxisomal biogenesis factor 11, putative, expressed                                           | Chr3  | 956806   | 960245 -   | 8  | 2823 | 5.37 |
| LOC_Os09g13880.1 | SWIM zinc finger family protein, putative, expressed                                            | Chr9  | 8165969  | 8169058 -  | 5  | 2799 | 5.37 |
| LOC_Os10g25140.1 | aminotransferase, classes I and II, domain containing protein, expressed                        | Chr10 | 12977397 | 12982478 + | 15 | 2225 | 5.37 |
| LOC_Os03g05220.3 | expressed protein                                                                               | Chr3  | 2530961  | 2532705 +  | 4  | 1027 | 5.37 |
| LOC_Os07g07230.2 | protein kinase, putative, expressed                                                             | Chr7  | 3583172  | 3588394 +  | 9  | 3870 | 5.37 |
| LOC_Os02g45650.1 | peptidase, putative, expressed                                                                  | Chr2  | 27764559 | 27770785 + | 14 | 2332 | 5.37 |
| LOC_Os01g04200.1 | metallo-beta-lactamase family protein, putative, expressed                                      | Chr1  | 1849834  | 1856303 +  | 13 | 2418 | 5.37 |
| LOC_Os05g41160.1 | expressed protein                                                                               | Chr5  | 24107391 | 24110147 - | 5  | 1129 | 5.37 |
| LOC_Os06g04130.2 | lung seven transmembrane domain containing protein, putative, expressed                         | Chr6  | 1725313  | 1729996 -  | 2  | 2037 | 5.37 |
| LOC_Os05g01590.1 | heat shock protein DnaJ, putative, expressed                                                    | Chr5  | 351640   | 354043 +   | 6  | 1196 | 5.38 |
| LOC_Os04g55040.2 | vacuolar ATP synthase subunit D 1, putative, expressed                                          | Chr4  | 32732598 | 32733949 + | 1  | 1384 | 5.38 |
| LOC_Os12g07500.1 | csAtPR5, putative, expressed                                                                    | Chr12 | 3723611  | 3726842 -  | 3  | 1560 | 5.38 |
| LOC_Os04g47370.2 | coiled-coil domain-containing protein 124, putative, expressed                                  | Chr4  | 28114866 | 28117519 + | 4  | 1229 | 5.38 |
| LOC_Os05g47510.1 | pentatricopeptide, putative, expressed                                                          | Chr5  | 27219015 | 27220337 + | 1  | 1355 | 5.38 |
| LOC_Os02g05770.1 | expressed protein                                                                               | Chr2  | 2838179  | 2842549 +  | 5  | 2134 | 5.38 |
| LOC_Os02g05770.2 | expressed protein                                                                               | Chr2  | 2838179  | 2842549 +  | 5  | 2110 | 5.38 |
| LOC_Os12g15460.1 | pentatricopeptide, putative, expressed                                                          | Chr12 | 8823315  | 8827128 -  | 3  | 3450 | 5.38 |
| LOC_Os12g01350.1 | csAtPR5, putative, expressed                                                                    | Chr12 | 204476   | 207191 +   | 3  | 1379 | 5.38 |
| LOC_Os02g55090.1 | expressed protein                                                                               | Chr2  | 33738591 | 33742250 - | 4  | 2225 | 5.38 |
| LOC_Os12g37390.1 | expressed protein                                                                               | Chr12 | 22951705 | 22953983 + | 3  | 1145 | 5.38 |
| LOC_Os06g48600.1 | macrophage migration inhibitory factor, putative, expressed                                     | Chr6  | 29402705 | 29403741 - | 3  | 805  | 5.38 |
| LOC_Os03g13240.1 | peptide transporter, putative, expressed                                                        | Chr3  | 7139072  | 7143558 -  | 5  | 2302 | 5.38 |
| LOC_Os03g08870.1 | expressed protein                                                                               | Chr3  | 4596019  | 4598260 +  | 4  | 935  | 5.38 |
| LOC_Os03g26791.1 | expressed protein                                                                               | Chr3  | 15295332 | 15297907 - | 2  | 602  | 5.38 |
| LOC_Os08g03870.2 | 2-aminoethanethiol dioxygenase, putative, expressed                                             | Chr8  | 1843879  | 1846218 +  | 6  | 1479 | 5.38 |
| LOC_Os08g03870.1 | 2-aminoethanethiol dioxygenase, putative, expressed                                             | Chr8  | 1843879  | 1846218 +  | 6  | 1488 | 5.38 |

|                   |                                                                         |       |          |          |   |    |      |      |
|-------------------|-------------------------------------------------------------------------|-------|----------|----------|---|----|------|------|
| LOC_Os04g42290.1  | methyladenine glycosylase, putative, expressed                          | Chr4  | 25017214 | 25020556 | + | 5  | 2043 | 5.38 |
| LOC_Os10g43040.1  | ankyrin repeat domain-containing protein 28, putative, expressed        | Chr10 | 23186413 | 23189553 | + | 2  | 1192 | 5.38 |
| LOC_Os04g46930.1  | serine racemase, putative, expressed                                    | Chr4  | 27823815 | 27826571 | - | 7  | 1573 | 5.38 |
| LOC_Os04g46930.2  | serine racemase, putative, expressed                                    | Chr4  | 27823815 | 27826597 | - | 7  | 1728 | 5.38 |
| LOC_Os06g13215.1  | growth regulator related protein, putative, expressed                   | Chr6  | 7256821  | 7259221  | + | 3  | 1517 | 5.38 |
| LOC_Os02g13580.1  | kinesin motor domain containing protein, expressed                      | Chr2  | 7281235  | 7285696  | - | 13 | 3410 | 5.39 |
| LOC_Os02g39600.1  | outer envelope protein, putative, expressed                             | Chr2  | 23894659 | 23898830 | - | 6  | 1667 | 5.39 |
| LOC_Os01g46500.3  | OsFBX21 - F-box domain containing protein, expressed                    | Chr1  | 26449051 | 26452875 | + | 4  | 2855 | 5.39 |
| LOC_Os01g46500.2  | OsFBX21 - F-box domain containing protein, expressed                    | Chr1  | 26449051 | 26452875 | + | 4  | 2862 | 5.39 |
| LOC_Os01g46500.1  | OsFBX21 - F-box domain containing protein, expressed                    | Chr1  | 26449051 | 26452875 | + | 4  | 2878 | 5.39 |
| LOC_Os02g43170.1  | B-box zinc finger family protein, putative, expressed                   | Chr2  | 26027785 | 26029489 | + | 3  | 1295 | 5.39 |
| LOC_Os02g43170.2  | B-box zinc finger family protein, putative, expressed                   | Chr2  | 26027785 | 26029493 | + | 2  | 1674 | 5.39 |
| LOC_Os04g50208.1  | phosphoenolpyruvate carboxykinase, putative, expressed                  | Chr4  | 29969234 | 29972696 | - | 10 | 1951 | 5.39 |
| LOC_Os12g06740.2  | OsFBX440 - F-box domain containing protein, expressed                   | Chr12 | 3280331  | 3282393  | + | 2  | 1718 | 5.39 |
| LOC_Os06g12060.1  | mTERF family protein, expressed                                         | Chr6  | 6461154  | 6465270  | - | 4  | 3073 | 5.39 |
| LOC_Os09g31220.1  | expressed protein                                                       | Chr9  | 18779539 | 18782063 | - | 4  | 1215 | 5.39 |
| LOC_Os09g31220.12 | expressed protein                                                       | Chr9  | 18779534 | 18782063 | - | 4  | 1228 | 5.39 |
| LOC_Os05g35380.1  | universal stress protein domain containing protein, putative, expressed | Chr5  | 21006683 | 21009694 | - | 3  | 1241 | 5.39 |
| LOC_Os04g53200.1  | exonuclease, putative, expressed                                        | Chr4  | 31678907 | 31683944 | - | 6  | 1698 | 5.39 |
| LOC_Os12g06250.1  | expressed protein                                                       | Chr12 | 2970928  | 2974160  | + | 2  | 2989 | 5.39 |
| LOC_Os02g02910.1  | expressed protein                                                       | Chr2  | 1126021  | 1132613  | - | 14 | 2928 | 5.39 |
| LOC_Os02g02910.2  | expressed protein                                                       | Chr2  | 1126021  | 1132616  | - | 14 | 2928 | 5.39 |
| LOC_Os02g02910.3  | expressed protein                                                       | Chr2  | 1126060  | 1132613  | - | 14 | 2891 | 5.39 |
| LOC_Os03g44420.1  | tubulin/FtsZ domain containing protein, putative, expressed             | Chr3  | 24996576 | 25000965 | + | 8  | 2460 | 5.39 |
| LOC_Os03g13240.2  | peptide transporter, putative, expressed                                | Chr3  | 7139072  | 7143520  | - | 5  | 2275 | 5.39 |
| LOC_Os01g63050.1  | expressed protein                                                       | Chr1  | 36527672 | 36530221 | + | 5  | 2342 | 5.39 |
| LOC_Os12g41760.1  | expressed protein                                                       | Chr12 | 25873568 | 25875554 | - | 3  | 618  | 5.40 |
| LOC_Os01g04910.1  | TP53RK-binding protein, putative, expressed                             | Chr1  | 2271163  | 2273757  | + | 7  | 1281 | 5.40 |
| LOC_Os02g51790.1  | ribosomal protein L29, putative, expressed                              | Chr2  | 31719721 | 31722499 | + | 2  | 1902 | 5.40 |
| LOC_Os10g42730.1  | expressed protein                                                       | Chr10 | 23055146 | 23057066 | + | 2  | 1189 | 5.40 |
| LOC_Os10g42730.3  | expressed protein                                                       | Chr10 | 23055146 | 23057066 | + | 2  | 1189 | 5.40 |
| LOC_Os10g42500.1  | PAP fibrillin family domain containing protein, expressed               | Chr10 | 22920519 | 22923454 | + | 3  | 1888 | 5.40 |
| LOC_Os03g04470.1  | expressed protein                                                       | Chr3  | 2073418  | 2075029  | + | 5  | 1378 | 5.40 |
| LOC_Os03g63250.2  | brefeldin A-sensitive Golgi protein-like, putative, expressed           | Chr3  | 35737258 | 35741607 | - | 9  | 2434 | 5.40 |
| LOC_Os05g02010.3  | expressed protein                                                       | Chr5  | 574774   | 576881   | + | 6  | 1608 | 5.40 |
| LOC_Os04g48310.1  | RING-H2 finger protein, putative, expressed                             | Chr4  | 28788484 | 28791208 | + | 3  | 1404 | 5.40 |
| LOC_Os04g57920.1  | OsFBX154 - F-box domain containing protein, expressed                   | Chr4  | 34505717 | 34513336 | - | 16 | 4392 | 5.40 |
| LOC_Os11g42850.1  | expressed protein                                                       | Chr11 | 25806201 | 25810387 | - | 7  | 1608 | 5.40 |
| LOC_Os01g36229.1  | expressed protein                                                       | Chr1  | 20041617 | 20044744 | + | 4  | 1458 | 5.40 |
| LOC_Os12g10540.3  | OsMADS13 - MADS-box family gene with MIKCC type-box, expressed          | Chr12 | 5586131  | 5590285  | + | 7  | 1411 | 5.40 |
| LOC_Os05g11750.1  | protein kinase, putative, expressed                                     | Chr5  | 6666498  | 6671971  | - | 6  | 1867 | 5.40 |
| LOC_Os12g08670.1  | C2 domain containing protein, expressed                                 | Chr12 | 4397152  | 4400640  | + | 5  | 2467 | 5.40 |
| LOC_Os12g19350.2  | expressed protein                                                       | Chr12 | 11218610 | 11232984 | - | 3  | 698  | 5.40 |
| LOC_Os02g10690.2  | targeting protein for Xklp2, putative, expressed                        | Chr2  | 5623352  | 5627373  | + | 8  | 1980 | 5.41 |
| LOC_Os02g10690.1  | targeting protein for Xklp2, putative, expressed                        | Chr2  | 5623352  | 5627373  | + | 8  | 1996 | 5.41 |

|                  |                                                                                                 |       |          |            |    |      |      |
|------------------|-------------------------------------------------------------------------------------------------|-------|----------|------------|----|------|------|
| LOC_Os01g02100.3 | transposon protein, putative, unclassified, expressed                                           | Chr1  | 598580   | 601472 +   | 4  | 2532 | 5.41 |
| LOC_Os08g06430.1 | mitochondrial NADH-ubiquinone oxidoreductase, putative, expressed                               | Chr8  | 3613350  | 3615878 +  | 3  | 833  | 5.41 |
| LOC_Os10g41696.1 | photosystem II reaction center protein K precursor, putative, expressed                         | Chr10 | 22448848 | 22449231 - | 1  | 416  | 5.41 |
| LOC_Os03g64020.1 | expressed protein                                                                               | Chr3  | 36180583 | 36183152 - | 7  | 1865 | 5.41 |
| LOC_Os06g07210.1 | ribonucleoside-diphosphate reductase large subunit, putative, expressed                         | Chr6  | 3449667  | 3454768 -  | 17 | 3701 | 5.41 |
| LOC_Os03g41280.1 | expressed protein                                                                               | Chr3  | 22947541 | 22950581 + | 3  | 2924 | 5.41 |
| LOC_Os09g17750.1 | oxidoreductase, short chain dehydrogenase/reductase family domain containing protein, expressed | Chr9  | 10849736 | 10853196 - | 9  | 1926 | 5.41 |
| LOC_Os03g51010.1 | hydrolase, alpha/beta fold family domain containing protein, expressed                          | Chr3  | 29150120 | 29153687 - | 7  | 2088 | 5.41 |
| LOC_Os01g09310.1 | EMB1895, putative, expressed                                                                    | Chr1  | 4734012  | 4737606 -  | 5  | 3413 | 5.41 |
| LOC_Os08g06630.1 | RNA polymerase sigma factor, putative, expressed                                                | Chr8  | 3732441  | 3736521 +  | 9  | 2823 | 5.41 |
| LOC_Os09g14880.1 | transposon protein, putative, Pong sub-class, expressed                                         | Chr9  | 8879454  | 8883845 -  | 4  | 2399 | 5.41 |
| LOC_Os03g14334.2 | expressed protein                                                                               | Chr3  | 7800190  | 7801862 +  | 2  | 1118 | 5.41 |
| LOC_Os07g07230.1 | protein kinase, putative, expressed                                                             | Chr7  | 3583270  | 3588394 +  | 8  | 3861 | 5.41 |
| LOC_Os11g42850.2 | expressed protein                                                                               | Chr11 | 25806201 | 25810387 - | 7  | 1793 | 5.41 |
| LOC_Os03g08680.1 | pentatricopeptide, putative, expressed                                                          | Chr3  | 4472456  | 4476109 -  | 6  | 2076 | 5.42 |
| LOC_Os03g44660.1 | cytosolic 5-nucleotidase III, putative, expressed                                               | Chr3  | 25142513 | 25146393 + | 9  | 1822 | 5.42 |
| LOC_Os12g10540.2 | OsMADS13 - MADS-box family gene with MIKCC type-box, expressed                                  | Chr12 | 5584593  | 5590285 +  | 8  | 1619 | 5.42 |
| LOC_Os08g35930.1 | OsFBL50 - F-box domain and LRR containing protein, expressed                                    | Chr8  | 22656289 | 22659552 - | 5  | 2689 | 5.42 |
| LOC_Os08g35930.2 | OsFBL50 - F-box domain and LRR containing protein, expressed                                    | Chr8  | 22656289 | 22659552 - | 4  | 2749 | 5.42 |
| LOC_Os07g25590.1 | decarboxylase, putative, expressed                                                              | Chr7  | 14669735 | 14676409 + | 12 | 1794 | 5.42 |
| LOC_Os04g43040.3 | expressed protein                                                                               | Chr4  | 25468673 | 25471556 - | 7  | 1317 | 5.42 |
| LOC_Os09g17870.1 | cytidyltransferase domain containing protein, expressed                                         | Chr9  | 10928396 | 10930718 - | 7  | 1922 | 5.42 |
| LOC_Os11g05180.2 | expressed protein                                                                               | Chr11 | 2278737  | 2281615 +  | 3  | 2620 | 5.42 |
| LOC_Os02g48600.1 | expressed protein                                                                               | Chr2  | 29752383 | 29753853 + | 2  | 1228 | 5.42 |
| LOC_Os04g51320.1 | transcription factor TF2, putative, expressed                                                   | Chr4  | 30393182 | 30395776 - | 2  | 1217 | 5.42 |
| LOC_Os07g11010.1 | protein Kinase-associated protein phosphatase, putative, expressed                              | Chr7  | 6051251  | 6060515 +  | 13 | 2874 | 5.42 |
| LOC_Os01g63710.1 | CDC6 - Putative DNA replication initiation protein, expressed                                   | Chr1  | 36952584 | 36956727 + | 17 | 2707 | 5.42 |
| LOC_Os03g15870.1 | ribosomal protein L4, putative, expressed                                                       | Chr3  | 8753551  | 8756023 +  | 2  | 1377 | 5.42 |
| LOC_Os01g02100.2 | transposon protein, putative, unclassified, expressed                                           | Chr1  | 598685   | 601472 +   | 3  | 2502 | 5.42 |
| LOC_Os01g02100.1 | transposon protein, putative, unclassified, expressed                                           | Chr1  | 598290   | 601472 +   | 4  | 2702 | 5.42 |
| LOC_Os06g44460.1 | D-3-phosphoglycerate dehydrogenase, chloroplast precursor, putative, expressed                  | Chr6  | 26854885 | 26858586 - | 5  | 2246 | 5.42 |
| LOC_Os07g42760.1 | expressed protein                                                                               | Chr7  | 25611925 | 25616379 - | 8  | 2259 | 5.42 |
| LOC_Os03g36830.1 | expressed protein                                                                               | Chr3  | 20444173 | 20447271 - | 2  | 2925 | 5.42 |
| LOC_Os04g42500.1 | trafficking protein particle complex subunit, putative, expressed                               | Chr4  | 25150360 | 25152873 + | 7  | 887  | 5.42 |
| LOC_Os02g05950.1 | phytosulfokine receptor precursor, putative, expressed                                          | Chr2  | 2958769  | 2962177 -  | 1  | 3441 | 5.42 |
| LOC_Os01g71256.1 | expressed protein                                                                               | Chr1  | 41230854 | 41235660 - | 7  | 2700 | 5.42 |
| LOC_Os06g39624.2 | transposon protein, putative, Pong sub-class, expressed                                         | Chr6  | 23521936 | 23526719 + | 4  | 2067 | 5.42 |
| LOC_Os01g47040.1 | C2 domain containing protein, putative, expressed                                               | Chr1  | 26862081 | 26863434 + | 1  | 1386 | 5.42 |
| LOC_Os11g36450.1 | OsFBO15 - F-box and other domain containing protein, expressed                                  | Chr11 | 21490562 | 21493404 - | 2  | 2093 | 5.42 |
| LOC_Os12g44040.2 | transposon protein, putative, unclassified, expressed                                           | Chr12 | 27313227 | 27316327 + | 4  | 2409 | 5.42 |
| LOC_Os12g44040.1 | transposon protein, putative, unclassified, expressed                                           | Chr12 | 27313227 | 27316327 + | 5  | 2308 | 5.42 |
| LOC_Os02g56190.1 | expressed protein                                                                               | Chr2  | 34370041 | 34372049 - | 4  | 949  | 5.42 |
| LOC_Os04g50208.2 | phosphoenolpyruvate carboxykinase, putative, expressed                                          | Chr4  | 29969234 | 29972696 - | 9  | 2227 | 5.42 |
| LOC_Os02g17970.1 | AGC_PKA/PKG_like.1 - ACG kinases include homologs to PKA, PKG and PKC, expressed                | Chr2  | 10420650 | 10428036 + | 15 | 4506 | 5.42 |
| LOC_Os09g32526.1 | peptidyl-prolyl cis-trans isomerase, FKBP-type, putative, expressed                             | Chr9  | 19415322 | 19418029 - | 6  | 1073 | 5.43 |



|                  |                                                                           |       |          |            |    |      |      |
|------------------|---------------------------------------------------------------------------|-------|----------|------------|----|------|------|
| LOC_Os03g18410.1 | DNA-directed RNA polymerase subunit, putative, expressed                  | Chr3  | 10320222 | 10324857 - | 9  | 1912 | 5.43 |
| LOC_Os01g04200.4 | metallo-beta-lactamase family protein, putative, expressed                | Chr1  | 1849837  | 1855978 +  | 11 | 2540 | 5.43 |
| LOC_Os01g27160.1 | cullin, putative, expressed                                               | Chr1  | 15146084 | 15152518 + | 18 | 3456 | 5.43 |
| LOC_Os12g10540.5 | OsMADS13 - MADS-box family gene with MIKCC type-box, expressed            | Chr12 | 5584790  | 5590285 +  | 9  | 1479 | 5.43 |
| LOC_Os12g10540.4 | OsMADS13 - MADS-box family gene with MIKCC type-box, expressed            | Chr12 | 5584775  | 5590285 +  | 8  | 1483 | 5.43 |
| LOC_Os09g31220.3 | expressed protein                                                         | Chr9  | 18779539 | 18782063 - | 4  | 1247 | 5.43 |
| LOC_Os04g43040.2 | expressed protein                                                         | Chr4  | 25468673 | 25471556 - | 6  | 1375 | 5.43 |
| LOC_Os10g33874.1 | PPR repeat domain containing protein, putative, expressed                 | Chr10 | 17980294 | 17985456 + | 8  | 3517 | 5.43 |
| LOC_Os05g41190.1 | expressed protein                                                         | Chr5  | 24127105 | 24128452 - | 3  | 1276 | 5.43 |
| LOC_Os05g41190.2 | expressed protein                                                         | Chr5  | 24127105 | 24128432 - | 2  | 1300 | 5.43 |
| LOC_Os01g54370.1 | dihydropyrimidinase, putative, expressed                                  | Chr1  | 31283686 | 31287268 + | 7  | 2548 | 5.43 |
| LOC_Os07g11010.2 | protein Kinase-associated protein phosphatase, putative, expressed        | Chr7  | 6052567  | 6060515 +  | 13 | 2799 | 5.43 |
| LOC_Os12g27994.1 | expressed protein                                                         | Chr12 | 16500199 | 16504887 - | 2  | 1671 | 5.44 |
| LOC_Os06g33980.2 | tRNA-splicing endonuclease subunit Sen2, putative, expressed              | Chr6  | 19783163 | 19785258 - | 2  | 1578 | 5.44 |
| LOC_Os01g56230.3 | transmembrane protein 56, putative, expressed                             | Chr1  | 32381210 | 32385675 - | 8  | 1669 | 5.44 |
| LOC_Os08g41850.2 | expressed protein                                                         | Chr8  | 26430707 | 26433051 - | 2  | 1675 | 5.44 |
| LOC_Os01g14020.2 | expressed protein                                                         | Chr1  | 7852645  | 7855760 +  | 5  | 1073 | 5.44 |
| LOC_Os03g62720.2 | exosome complex exonuclease, putative, expressed                          | Chr3  | 35494058 | 35497784 + | 7  | 1546 | 5.44 |
| LOC_Os12g01530.3 | ferritin-1, chloroplast precursor, putative, expressed                    | Chr12 | 320214   | 323719 -   | 5  | 1482 | 5.44 |
| LOC_Os06g20310.4 | expressed protein                                                         | Chr6  | 11669578 | 11673430 - | 6  | 3085 | 5.44 |
| LOC_Os02g05810.2 | expressed protein                                                         | Chr2  | 2865054  | 2869033 +  | 4  | 3735 | 5.44 |
| LOC_Os04g37470.1 | oxidoreductase, aldo/keto reductase family protein, putative, expressed   | Chr4  | 22316817 | 22319418 + | 4  | 1130 | 5.44 |
| LOC_Os05g46140.1 | expressed protein                                                         | Chr5  | 26761834 | 26764812 - | 8  | 1224 | 5.44 |
| LOC_Os08g40190.1 | expressed protein                                                         | Chr8  | 25434400 | 25436334 + | 3  | 927  | 5.44 |
| LOC_Os02g39290.1 | TRAF-type zinc finger family protein, expressed                           | Chr2  | 23726236 | 23729128 - | 3  | 1697 | 5.44 |
| LOC_Os03g18120.1 | proteins of unknown function domain containing protein, expressed         | Chr3  | 10116219 | 10120924 + | 6  | 2311 | 5.44 |
| LOC_Os09g32526.2 | peptidyl-prolyl cis-trans isomerase, FKBP-type, putative, expressed       | Chr9  | 19415322 | 19418029 - | 5  | 1144 | 5.44 |
| LOC_Os12g08820.1 | growth regulator related protein, putative, expressed                     | Chr12 | 4551091  | 4556276 +  | 12 | 2393 | 5.44 |
| LOC_Os10g38910.1 | expressed protein                                                         | Chr10 | 20729297 | 20731000 - | 1  | 1736 | 5.44 |
| LOC_Os02g05810.1 | expressed protein                                                         | Chr2  | 2865048  | 2869033 +  | 3  | 3801 | 5.44 |
| LOC_Os03g27320.1 | steroid binding protein, putative, expressed                              | Chr3  | 15648901 | 15652157 + | 6  | 1541 | 5.44 |
| LOC_Os12g27994.2 | expressed protein                                                         | Chr12 | 16500199 | 16507888 - | 2  | 1574 | 5.44 |
| LOC_Os05g49250.2 | hhH-GPD superfamily base excision DNA repair protein, putative, expressed | Chr5  | 28251313 | 28256758 - | 7  | 3352 | 5.44 |
| LOC_Os02g58030.1 | leucine-rich repeat-containing protein 40, putative, expressed            | Chr2  | 35526587 | 35533091 - | 21 | 2983 | 5.44 |
| LOC_Os09g17870.2 | cytidyltransferase domain containing protein, expressed                   | Chr9  | 10928396 | 10930718 - | 7  | 1915 | 5.44 |
| LOC_Os04g52030.1 | zinc finger domain, LSD1 subclass family protein, expressed               | Chr4  | 30904539 | 30907663 - | 7  | 2043 | 5.44 |
| LOC_Os02g13640.1 | protein phosphatase 1 regulatory subunit SDS22, putative, expressed       | Chr2  | 7316388  | 7319489 +  | 6  | 1837 | 5.45 |
| LOC_Os03g36110.1 | expressed protein                                                         | Chr3  | 20030272 | 20033711 - | 8  | 2435 | 5.45 |
| LOC_Os03g36110.2 | expressed protein                                                         | Chr3  | 20030272 | 20033711 - | 7  | 2498 | 5.45 |
| LOC_Os03g27320.5 | steroid binding protein, putative, expressed                              | Chr3  | 15648901 | 15652157 + | 5  | 1627 | 5.45 |
| LOC_Os02g10320.1 | 3-oxoacyl-synthase, putative, expressed                                   | Chr2  | 5422121  | 5424926 -  | 11 | 1646 | 5.45 |
| LOC_Os02g02424.2 | ZOS2-02 - C2H2 zinc finger protein, expressed                             | Chr2  | 853767   | 859880 -   | 7  | 3169 | 5.45 |
| LOC_Os09g01680.2 | DNA repair protein RAD51 homolog 4, putative, expressed                   | Chr9  | 485012   | 490813 -   | 7  | 3032 | 5.45 |
| LOC_Os05g48150.1 | transposon protein, putative, unclassified, expressed                     | Chr5  | 27602412 | 27605498 + | 3  | 2129 | 5.45 |
| LOC_Os03g14040.2 | expressed protein                                                         | Chr3  | 7615918  | 7618902 +  | 7  | 1211 | 5.45 |

|                  |                                                                                          |       |          |            |    |      |      |
|------------------|------------------------------------------------------------------------------------------|-------|----------|------------|----|------|------|
| LOC_Os06g44880.1 | type II intron maturase protein, putative, expressed                                     | Chr6  | 27126260 | 27130156 - | 5  | 2806 | 5.45 |
| LOC_Os03g04590.1 | ribosomal protein, putative, expressed                                                   | Chr3  | 2142725  | 2145526 +  | 4  | 865  | 5.45 |
| LOC_Os04g45860.1 | transposon protein, putative, unclassified, expressed                                    | Chr4  | 27154339 | 27158799 - | 8  | 2793 | 5.45 |
| LOC_Os01g52851.1 | expressed protein                                                                        | Chr1  | 30392739 | 30395472 + | 4  | 1088 | 5.45 |
| LOC_Os12g16690.1 | zinc finger, C3HC4 type domain containing protein, expressed                             | Chr12 | 9565764  | 9570986 +  | 6  | 3586 | 5.45 |
| LOC_Os01g74460.1 | vacuolar fusion protein MON1 homolog A, putative, expressed                              | Chr1  | 43120081 | 43125721 - | 14 | 2729 | 5.45 |
| LOC_Os04g47370.1 | coiled-coil domain-containing protein 124, putative, expressed                           | Chr4  | 28114866 | 28117522 + | 4  | 1631 | 5.45 |
| LOC_Os03g56850.1 | pentatricopeptide, putative, expressed                                                   | Chr3  | 32388963 | 32392220 + | 2  | 2703 | 5.45 |
| LOC_Os03g16740.1 | protein kinase APK1A, chloroplast precursor, putative, expressed                         | Chr3  | 9269491  | 9273582 -  | 6  | 2738 | 5.45 |
| LOC_Os03g16740.2 | protein kinase APK1A, chloroplast precursor, putative, expressed                         | Chr3  | 9269491  | 9273580 -  | 6  | 2730 | 5.45 |
| LOC_Os04g38980.1 | pentatricopeptide, putative, expressed                                                   | Chr4  | 23153801 | 23158503 - | 5  | 2947 | 5.45 |
| LOC_Os09g31300.2 | helix-loop-helix DNA-binding domain containing protein, expressed                        | Chr9  | 18814008 | 18817017 + | 5  | 2266 | 5.45 |
| LOC_Os09g31300.1 | helix-loop-helix DNA-binding domain containing protein, expressed                        | Chr9  | 18814008 | 18817017 + | 5  | 2272 | 5.45 |
| LOC_Os12g09670.1 | expressed protein                                                                        | Chr12 | 5103729  | 5107187 -  | 3  | 1466 | 5.45 |
| LOC_Os12g01530.1 | ferritin-1, chloroplast precursor, putative, expressed                                   | Chr12 | 320214   | 323923 -   | 8  | 1998 | 5.45 |
| LOC_Os12g01530.2 | ferritin-1, chloroplast precursor, putative, expressed                                   | Chr12 | 320214   | 323923 -   | 8  | 1974 | 5.45 |
| LOC_Os04g46160.1 | expressed protein                                                                        | Chr4  | 27341410 | 27343657 - | 5  | 882  | 5.46 |
| LOC_Os04g49490.1 | protein phosphatase 2C, putative, expressed                                              | Chr4  | 29515047 | 29518435 - | 4  | 2956 | 5.46 |
| LOC_Os12g34098.1 | hypothetical protein                                                                     | Chr12 | 20635380 | 20635838 + | 1  | 491  | 5.46 |
| LOC_Os02g58120.1 | oxidoreductase/ transition metal ion binding protein, putative, expressed                | Chr2  | 35567720 | 35570416 - | 8  | 1409 | 5.46 |
| LOC_Os03g27320.3 | steroid binding protein, putative, expressed                                             | Chr3  | 15648901 | 15652157 + | 6  | 1466 | 5.46 |
| LOC_Os01g74460.2 | vacuolar fusion protein MON1 homolog A, putative, expressed                              | Chr1  | 43120081 | 43125721 - | 13 | 2780 | 5.46 |
| LOC_Os08g07290.1 | HEAT repeat family protein, putative, expressed                                          | Chr8  | 4069808  | 4077663 -  | 5  | 6679 | 5.46 |
| LOC_Os01g47690.2 | metallo-beta-lactamase family protein, putative, expressed                               | Chr1  | 27275111 | 27278560 - | 7  | 1609 | 5.46 |
| LOC_Os08g14330.1 | aldose 1-epimerase, putative, expressed                                                  | Chr8  | 8589037  | 8594478 -  | 9  | 2110 | 5.46 |
| LOC_Os03g02980.2 | CAMK_CAMK_like_ULKh_APgy.1 - CAMK includes calcium/calmodulin depeudent protein kinases, | Chr3  | 1211679  | 1217861 +  | 13 | 2761 | 5.46 |
| LOC_Os01g56510.1 | periplasmic beta-glucosidase precursor, putative, expressed                              | Chr1  | 32580710 | 32586143 - | 13 | 2867 | 5.46 |
| LOC_Os10g35730.1 | pentatricopeptide repeat domain containing protein, putative, expressed                  | Chr10 | 19104084 | 19105750 + | 2  | 1623 | 5.46 |
| LOC_Os03g02690.1 | dihydrodipicolinate reductase, putative, expressed                                       | Chr3  | 1004394  | 1007269 +  | 10 | 1790 | 5.46 |
| LOC_Os12g37590.1 | prefoldin, putative, expressed                                                           | Chr12 | 23079981 | 23084575 + | 6  | 1203 | 5.46 |
| LOC_Os04g21890.1 | disease resistance protein RPM1, putative, expressed                                     | Chr4  | 12396117 | 12398915 + | 1  | 2831 | 5.46 |
| LOC_Os03g02590.4 | peroxisomal biogenesis factor 11, putative, expressed                                    | Chr3  | 956806   | 960245 -   | 7  | 3020 | 5.46 |
| LOC_Os03g04590.3 | ribosomal protein, putative, expressed                                                   | Chr3  | 2142725  | 2145526 +  | 4  | 996  | 5.46 |
| LOC_Os02g51119.2 | expressed protein                                                                        | Chr2  | 31273211 | 31284049 - | 10 | 3014 | 5.46 |
| LOC_Os05g27920.1 | phox domain-containing protein, putative, expressed                                      | Chr5  | 16289244 | 16296693 + | 5  | 2450 | 5.46 |
| LOC_Os06g20310.1 | expressed protein                                                                        | Chr6  | 11670344 | 11673430 - | 5  | 2369 | 5.46 |
| LOC_Os06g20310.3 | expressed protein                                                                        | Chr6  | 11669579 | 11673430 - | 5  | 3131 | 5.46 |
| LOC_Os06g20310.2 | expressed protein                                                                        | Chr6  | 11669579 | 11673430 - | 5  | 3149 | 5.46 |
| LOC_Os09g28489.1 | expressed protein                                                                        | Chr9  | 17326916 | 17328680 - | 1  | 1797 | 5.46 |
| LOC_Os01g70940.3 | potassium transporter, putative, expressed                                               | Chr1  | 41061091 | 41067527 + | 9  | 3966 | 5.46 |
| LOC_Os01g70940.2 | potassium transporter, putative, expressed                                               | Chr1  | 41061091 | 41067527 + | 11 | 3853 | 5.46 |
| LOC_Os01g70940.1 | potassium transporter, putative, expressed                                               | Chr1  | 41061091 | 41067527 + | 10 | 3781 | 5.46 |
| LOC_Os01g74010.2 | cyclase/dehydrase family protein, expressed                                              | Chr1  | 42870524 | 42872686 - | 5  | 1464 | 5.47 |
| LOC_Os03g05812.4 | expressed protein                                                                        | Chr3  | 2908989  | 2912672 +  | 8  | 2461 | 5.47 |
| LOC_Os01g57250.1 | expressed protein                                                                        | Chr1  | 33082077 | 33083412 + | 1  | 1368 | 5.47 |

|                  |                                                                        |       |          |            |    |      |      |
|------------------|------------------------------------------------------------------------|-------|----------|------------|----|------|------|
| LOC_Os06g27590.1 | expressed protein                                                      | Chr6  | 15611975 | 15612817 - | 2  | 730  | 5.47 |
| LOC_Os04g38914.1 | expressed protein                                                      | Chr4  | 23125233 | 23126052 - | 2  | 771  | 5.47 |
| LOC_Os03g36419.1 | expressed protein                                                      | Chr3  | 20185455 | 20187928 - | 5  | 1442 | 5.47 |
| LOC_Os08g08200.2 | mRNA cap guanine-N7 methyltransferase 1, putative, expressed           | Chr8  | 4676287  | 4680501 -  | 13 | 2006 | 5.47 |
| LOC_Os08g08200.1 | mRNA cap guanine-N7 methyltransferase 1, putative, expressed           | Chr8  | 4676286  | 4680501 -  | 13 | 1950 | 5.47 |
| LOC_Os03g56220.1 | stress-induced protein, putative, expressed                            | Chr3  | 32027891 | 32029915 - | 1  | 2057 | 5.47 |
| LOC_Os04g44590.2 | expressed protein                                                      | Chr4  | 26387544 | 26388693 + | 3  | 780  | 5.47 |
| LOC_Os12g34900.3 | expressed protein                                                      | Chr12 | 21247569 | 21250227 + | 5  | 1285 | 5.47 |
| LOC_Os01g43220.1 | chitinase domain-containing protein 1 precursor, putative, expressed   | Chr1  | 24691392 | 24697071 + | 7  | 2663 | 5.47 |
| LOC_Os09g27860.1 | expressed protein                                                      | Chr9  | 16945130 | 16948035 - | 2  | 1303 | 5.47 |
| LOC_Os05g05530.3 | expressed protein                                                      | Chr5  | 2748324  | 2749685 -  | 2  | 1071 | 5.47 |
| LOC_Os03g49230.1 | acetyltransferase, GNAT family, putative, expressed                    | Chr3  | 28039346 | 28042378 - | 6  | 1151 | 5.47 |
| LOC_Os03g14540.1 | UDP-glucuronate 4-epimerase, putative, expressed                       | Chr3  | 7889242  | 7891358 +  | 1  | 2149 | 5.47 |
| LOC_Os01g74010.1 | cyclase/dehydrase family protein, expressed                            | Chr1  | 42870524 | 42872686 - | 5  | 1500 | 5.47 |
| LOC_Os04g48260.1 | zinc RING finger protein, putative, expressed                          | Chr4  | 28744397 | 28747883 + | 7  | 1528 | 5.47 |
| LOC_Os01g64190.1 | expressed protein                                                      | Chr1  | 37278991 | 37280491 - | 1  | 1533 | 5.47 |
| LOC_Os08g16470.1 | expressed protein                                                      | Chr8  | 10085483 | 10087943 - | 3  | 528  | 5.47 |
| LOC_Os08g44230.1 | zinc finger family protein, putative, expressed                        | Chr8  | 27842259 | 27847633 + | 9  | 3063 | 5.48 |
| LOC_Os06g08860.1 | transporter family protein, putative, expressed                        | Chr6  | 4443021  | 4446510 -  | 7  | 1567 | 5.48 |
| LOC_Os03g02690.2 | dihydrodipicolinate reductase, putative, expressed                     | Chr3  | 1004299  | 1007269 +  | 11 | 1796 | 5.48 |
| LOC_Os04g43040.1 | expressed protein                                                      | Chr4  | 25468585 | 25471556 - | 6  | 1466 | 5.48 |
| LOC_Os03g62720.1 | exosome complex exonuclease, putative, expressed                       | Chr3  | 35494074 | 35497784 + | 7  | 1569 | 5.48 |
| LOC_Os02g03610.1 | ADP-ribosylation factor, putative, expressed                           | Chr2  | 1476335  | 1480287 +  | 7  | 1424 | 5.48 |
| LOC_Os08g27580.1 | expressed protein                                                      | Chr8  | 16811699 | 16814914 + | 4  | 1469 | 5.48 |
| LOC_Os03g40690.1 | PPR repeat containing protein, expressed                               | Chr3  | 22624156 | 22628484 + | 4  | 3241 | 5.48 |
| LOC_Os08g37115.1 | expressed protein                                                      | Chr8  | 23450391 | 23452993 + | 2  | 1905 | 5.48 |
| LOC_Os12g38480.2 | expressed protein                                                      | Chr12 | 23617086 | 23624084 + | 7  | 2809 | 5.48 |
| LOC_Os04g41560.2 | B-box zinc finger family protein, putative, expressed                  | Chr4  | 24647901 | 24649396 - | 3  | 1368 | 5.48 |
| LOC_Os04g41560.4 | B-box zinc finger family protein, putative, expressed                  | Chr4  | 24647901 | 24649396 - | 2  | 1431 | 5.48 |
| LOC_Os12g37690.1 | MYB family transcription factor, putative, expressed                   | Chr12 | 23135056 | 23137352 - | 3  | 1400 | 5.48 |
| LOC_Os05g44390.1 | peptidyl-tRNA hydrolase, putative, expressed                           | Chr5  | 25823704 | 25826801 - | 9  | 1554 | 5.48 |
| LOC_Os08g05830.2 | transaldolase, putative, expressed                                     | Chr8  | 3128300  | 3132237 -  | 10 | 2977 | 5.48 |
| LOC_Os08g05830.3 | transaldolase, putative, expressed                                     | Chr8  | 3128285  | 3132235 -  | 10 | 2990 | 5.48 |
| LOC_Os04g53510.1 | OsFBL20 - F-box domain and LRR containing protein, expressed           | Chr4  | 31875725 | 31879749 - | 5  | 2473 | 5.48 |
| LOC_Os03g15560.1 | wibg, putative, expressed                                              | Chr3  | 8568445  | 8572063 +  | 4  | 1571 | 5.48 |
| LOC_Os11g31110.1 | expressed protein                                                      | Chr11 | 18106956 | 18113191 - | 8  | 2401 | 5.48 |
| LOC_Os04g50020.1 | heavy-metal-associated domain-containing protein, putative, expressed  | Chr4  | 29827863 | 29828919 + | 4  | 875  | 5.48 |
| LOC_Os04g49620.1 | DUF581 domain containing protein, expressed                            | Chr4  | 29588213 | 29590515 - | 2  | 1181 | 5.49 |
| LOC_Os09g32780.1 | transposon protein, putative, unclassified, expressed                  | Chr9  | 19555482 | 19560222 + | 9  | 4129 | 5.49 |
| LOC_Os03g48600.1 | domain of unknown function DUF966 domain containing protein, expressed | Chr3  | 27705346 | 27710255 - | 9  | 2786 | 5.49 |
| LOC_Os06g04040.3 | WD domain, G-beta repeat domain containing protein, expressed          | Chr6  | 1648595  | 1651506 +  | 7  | 1434 | 5.49 |
| LOC_Os01g65200.1 | proton-dependent oligopeptide transport, putative, expressed           | Chr1  | 37834177 | 37836926 + | 5  | 2132 | 5.49 |
| LOC_Os01g65200.3 | proton-dependent oligopeptide transport, putative, expressed           | Chr1  | 37834177 | 37836926 + | 4  | 2200 | 5.49 |
| LOC_Os01g65200.2 | proton-dependent oligopeptide transport, putative, expressed           | Chr1  | 37834177 | 37836926 + | 3  | 2250 | 5.49 |
| LOC_Os05g32710.1 | Alpha amylase, catalytic domain containing protein, expressed          | Chr5  | 19154970 | 19157600 - | 1  | 2663 | 5.49 |

|                   |                                                                                           |       |          |            |    |      |      |
|-------------------|-------------------------------------------------------------------------------------------|-------|----------|------------|----|------|------|
| LOC_Os10g07340.1  | expressed protein                                                                         | Chr10 | 3868240  | 3871296 +  | 1  | 3089 | 5.49 |
| LOC_Os11g06680.2  | expressed protein                                                                         | Chr11 | 3250101  | 3254509 -  | 3  | 3384 | 5.49 |
| LOC_Os11g07020.1  | fructose-bisphosphate aldolase isozyme, putative, expressed                               | Chr11 | 3488553  | 3491659 -  | 6  | 1949 | 5.49 |
| LOC_Os11g07020.4  | fructose-bisphosphate aldolase isozyme, putative, expressed                               | Chr11 | 3488553  | 3491659 -  | 6  | 1930 | 5.49 |
| LOC_Os11g07020.5  | fructose-bisphosphate aldolase isozyme, putative, expressed                               | Chr11 | 3488553  | 3491659 -  | 5  | 2018 | 5.49 |
| LOC_Os11g07020.7  | fructose-bisphosphate aldolase isozyme, putative, expressed                               | Chr11 | 3488553  | 3491659 -  | 5  | 2093 | 5.49 |
| LOC_Os06g33980.1  | tRNA-splicing endonuclease subunit Sen2, putative, expressed                              | Chr6  | 19783163 | 19785258 - | 3  | 1642 | 5.49 |
| LOC_Os06g42164.1  | expressed protein                                                                         | Chr6  | 25315703 | 25316474 + | 1  | 804  | 5.49 |
| LOC_Os09g10760.1  | RNA recognition motif containing protein, putative, expressed                             | Chr9  | 5870961  | 5873202 -  | 4  | 1302 | 5.49 |
| LOC_Os04g48170.1  | cytochrome P450, putative, expressed                                                      | Chr4  | 28672747 | 28677225 - | 9  | 2473 | 5.49 |
| LOC_Os03g02690.3  | dihydrodipicolinate reductase, putative, expressed                                        | Chr3  | 1004299  | 1007269 +  | 11 | 1815 | 5.49 |
| LOC_Os07g07060.1  | prolyl-tRNA synthetase, putative, expressed                                               | Chr7  | 3483093  | 3486794 +  | 9  | 2655 | 5.49 |
| LOC_Os02g02020.1  | pentatricopeptide, putative, expressed                                                    | Chr2  | 561823   | 564487 -   | 1  | 2697 | 5.49 |
| LOC_Os07g16130.1  | acetyltransferase, GNAT family, putative, expressed                                       | Chr7  | 9395365  | 9397527 +  | 4  | 1247 | 5.49 |
| LOC_Os12g25630.1  | sulfite oxidase, putative, expressed                                                      | Chr12 | 14827312 | 14830607 - | 12 | 2050 | 5.49 |
| LOC_Os02g37834.1  | expressed protein                                                                         | Chr2  | 22835797 | 22837146 + | 3  | 780  | 5.49 |
| LOC_Os07g48720.2  | MAG2, putative, expressed                                                                 | Chr7  | 29173992 | 29178326 + | 3  | 3129 | 5.49 |
| LOC_Os11g07124.1  | EFR, putative, expressed                                                                  | Chr11 | 3548134  | 3552354 +  | 6  | 3291 | 5.49 |
| LOC_Os06g36840.1  | cysteine synthase, putative, expressed                                                    | Chr6  | 21700478 | 21703430 - | 7  | 1745 | 5.49 |
| LOC_Os05g33020.1  | preprotein translocase subunit secY, putative, expressed                                  | Chr5  | 19346026 | 19353385 - | 13 | 3015 | 5.49 |
| LOC_Os02g40450.1  | DEAD/DEAH box helicase domain containing protein, expressed                               | Chr2  | 24518227 | 24527233 + | 26 | 4778 | 5.49 |
| LOC_Os07g28090.1  | ABC transporter, ATP-binding protein, putative, expressed                                 | Chr7  | 16375059 | 16387446 + | 16 | 3304 | 5.49 |
| LOC_Os07g39090.1  | pentatricopeptide repeat domain containing protein, putative, expressed                   | Chr7  | 23425405 | 23430886 - | 6  | 3228 | 5.49 |
| LOC_Os03g27320.2  | steroid binding protein, putative, expressed                                              | Chr3  | 15648901 | 15652157 + | 6  | 1481 | 5.50 |
| LOC_Os01g69090.1  | CBS domain-containing protein, putative, expressed                                        | Chr1  | 40153160 | 40157182 - | 2  | 1617 | 5.50 |
| LOC_Os08g44520.1  | peptidyl-prolyl cis-trans isomerase, putative, expressed                                  | Chr8  | 27999765 | 28003568 - | 6  | 1083 | 5.50 |
| LOC_Os05g15180.1  | expressed protein                                                                         | Chr5  | 8616501  | 8618486 -  | 5  | 904  | 5.50 |
| LOC_Os05g15180.2  | expressed protein                                                                         | Chr5  | 8616501  | 8618486 -  | 5  | 908  | 5.50 |
| LOC_Os08g44520.2  | peptidyl-prolyl cis-trans isomerase, putative, expressed                                  | Chr8  | 27999765 | 28002348 - | 6  | 1131 | 5.50 |
| LOC_Os03g48600.12 | domain of unknown function DUF966 domain containing protein, expressed                    | Chr3  | 27705346 | 27710255 - | 8  | 2676 | 5.50 |
| LOC_Os03g48600.3  | domain of unknown function DUF966 domain containing protein, expressed                    | Chr3  | 27705346 | 27710255 - | 8  | 2679 | 5.50 |
| LOC_Os03g48600.7  | domain of unknown function DUF966 domain containing protein, expressed                    | Chr3  | 27705346 | 27710255 - | 8  | 2682 | 5.50 |
| LOC_Os03g48600.2  | domain of unknown function DUF966 domain containing protein, expressed                    | Chr3  | 27705346 | 27710255 - | 9  | 2838 | 5.50 |
| LOC_Os01g48760.1  | THAP domain-containing protein 4, putative, expressed                                     | Chr1  | 27961739 | 27965444 + | 4  | 945  | 5.50 |
| LOC_Os01g48760.2  | THAP domain-containing protein 4, putative, expressed                                     | Chr1  | 27961739 | 27965444 + | 4  | 936  | 5.50 |
| LOC_Os08g44520.3  | peptidyl-prolyl cis-trans isomerase, putative, expressed                                  | Chr8  | 27999765 | 28002389 - | 6  | 1136 | 5.50 |
| LOC_Os03g02980.1  | CAMK_CAMK_like_ULKh_APGy.1 - CAMK includes calcium/calmodulin dependent protein kinases,  | Chr3  | 1211681  | 1217861 +  | 11 | 2751 | 5.50 |
| LOC_Os05g39870.1  | CAMK_KIN1/SNF1/Nim1_like.24 - CAMK includes calcium/calmodulin dependent protein kinases, | Chr5  | 23429486 | 23434020 - | 7  | 2168 | 5.50 |
| LOC_Os05g01460.1  | STIP1 homology and U box-containing protein 1, putative, expressed                        | Chr5  | 263725   | 266445 -   | 8  | 1549 | 5.50 |
| LOC_Os08g27580.2  | expressed protein                                                                         | Chr8  | 16811699 | 16814914 + | 4  | 1510 | 5.50 |
| LOC_Os02g02880.1  | expressed protein                                                                         | Chr2  | 1106242  | 1111999 -  | 8  | 2387 | 5.50 |
| LOC_Os09g39640.1  | protein kinase, putative, expressed                                                       | Chr9  | 22747357 | 22752211 + | 8  | 2892 | 5.51 |
| LOC_Os12g31470.1  | retrotransposon protein, putative, unclassified, expressed                                | Chr12 | 18922804 | 18931492 + | 11 | 6961 | 5.51 |
| LOC_Os07g14540.1  | vesicle-associated membrane protein, putative, expressed                                  | Chr7  | 8287836  | 8291216 +  | 5  | 1406 | 5.51 |
| LOC_Os10g07160.1  | retrotransposon, putative, centromere-specific, expressed                                 | Chr10 | 3755107  | 3762605 -  | 11 | 2404 | 5.51 |

|                  |                                                                                           |       |          |            |    |      |      |
|------------------|-------------------------------------------------------------------------------------------|-------|----------|------------|----|------|------|
| LOC_Os04g39410.1 | pentatricopeptide, putative, expressed                                                    | Chr4  | 23457977 | 23461347 - | 1  | 3403 | 5.51 |
| LOC_Os04g45750.1 | expressed protein                                                                         | Chr4  | 27077367 | 27080595 - | 3  | 3095 | 5.51 |
| LOC_Os04g45750.2 | expressed protein                                                                         | Chr4  | 27077367 | 27080595 - | 2  | 3181 | 5.51 |
| LOC_Os03g12000.1 | DEAD-box ATP-dependent RNA helicase, putative, expressed                                  | Chr3  | 6286011  | 6288451 -  | 2  | 2194 | 5.51 |
| LOC_Os01g08650.2 | expressed protein                                                                         | Chr1  | 4306882  | 4309935 +  | 2  | 1789 | 5.51 |
| LOC_Os01g08650.1 | expressed protein                                                                         | Chr1  | 4306882  | 4309963 +  | 2  | 1819 | 5.51 |
| LOC_Os05g08560.1 | transposon protein, putative, unclassified, expressed                                     | Chr5  | 4669106  | 4672385 -  | 2  | 2142 | 5.51 |
| LOC_Os05g04070.1 | expressed protein                                                                         | Chr5  | 1830739  | 1833326 -  | 8  | 1455 | 5.51 |
| LOC_Os05g11064.1 | expressed protein                                                                         | Chr5  | 6198378  | 6200860 -  | 2  | 2116 | 5.51 |
| LOC_Os04g59340.1 | RNA-binding region RNP-1, putative, expressed                                             | Chr4  | 35280662 | 35282692 + | 3  | 1601 | 5.51 |
| LOC_Os10g26690.1 | structural constituent of ribosome, putative, expressed                                   | Chr10 | 13937442 | 13939572 - | 3  | 929  | 5.51 |
| LOC_Os02g03540.1 | phosphoribosyl transferase, putative, expressed                                           | Chr2  | 1437433  | 1441125 -  | 9  | 1744 | 5.51 |
| LOC_Os05g38990.1 | CCT motif family protein, expressed                                                       | Chr5  | 22874242 | 22875817 - | 3  | 1475 | 5.51 |
| LOC_Os05g43130.1 | brix domain-containing protein 1, putative, expressed                                     | Chr5  | 25041530 | 25043493 - | 4  | 1746 | 5.51 |
| LOC_Os01g68790.4 | RNA recognition motif containing protein, putative, expressed                             | Chr1  | 39954529 | 39956523 + | 5  | 1146 | 5.51 |
| LOC_Os09g01690.1 | expressed protein                                                                         | Chr9  | 490930   | 493986 +   | 3  | 1130 | 5.51 |
| LOC_Os08g32130.1 | heat shock protein DnaJ, putative, expressed                                              | Chr8  | 19937095 | 19940521 + | 5  | 1698 | 5.51 |
| LOC_Os02g26850.1 | rRNA-processing protein FCF, putative, expressed                                          | Chr2  | 15762105 | 15765880 - | 5  | 1567 | 5.52 |
| LOC_Os09g01690.2 | expressed protein                                                                         | Chr9  | 490930   | 493986 +   | 3  | 1148 | 5.52 |
| LOC_Os06g22810.1 | TKL_IRAK_CrRLK1L-1.14 - The CrRLK1L-1 subfamily has homology to the CrRLK1L homolog, expe | Chr6  | 13297087 | 13301279 + | 2  | 3257 | 5.52 |
| LOC_Os01g17150.1 | plastid-specific 50S ribosomal protein 5, chloroplast precursor, putative, expressed      | Chr1  | 9859350  | 9860764 +  | 2  | 779  | 5.52 |
| LOC_Os03g22450.1 | auxin response factor 75, putative, expressed                                             | Chr3  | 12865228 | 12869292 - | 9  | 1951 | 5.52 |
| LOC_Os04g58640.1 | cleavage and polyadenylation specificity factor subunit 5, putative, expressed            | Chr4  | 34877801 | 34881638 - | 7  | 1535 | 5.52 |
| LOC_Os03g51930.2 | expressed protein                                                                         | Chr3  | 29788461 | 29791210 - | 5  | 1338 | 5.52 |
| LOC_Os10g41220.1 | protein kinase family protein, putative, expressed                                        | Chr10 | 22136928 | 22141736 + | 10 | 3231 | 5.52 |
| LOC_Os09g13940.5 | AP2 domain containing protein, expressed                                                  | Chr9  | 8201686  | 8202666 -  | 2  | 580  | 5.52 |
| LOC_Os09g24710.3 | alpha/beta hydrolase fold, putative, expressed                                            | Chr9  | 14711584 | 14716558 + | 5  | 1271 | 5.52 |
| LOC_Os12g42960.1 | expressed protein                                                                         | Chr12 | 26686790 | 26689406 - | 3  | 2207 | 5.52 |
| LOC_Os01g54020.1 | tRNA synthetase, putative, expressed                                                      | Chr1  | 31070191 | 31076279 - | 15 | 2056 | 5.52 |
| LOC_Os01g54020.2 | tRNA synthetase, putative, expressed                                                      | Chr1  | 31070166 | 31076279 - | 15 | 2063 | 5.52 |
| LOC_Os06g26340.3 | CGMC_MAPKCMGC_2.10 - CGMC includes CDA, MAPK, GSK3, and CLKC kinases, expressed           | Chr6  | 15417039 | 15423582 - | 5  | 1848 | 5.52 |
| LOC_Os01g50032.1 | expressed protein                                                                         | Chr1  | 28740236 | 28744474 + | 13 | 2009 | 5.52 |
| LOC_Os03g15180.1 | PH domain containing protein, expressed                                                   | Chr3  | 8294689  | 8306264 -  | 21 | 2778 | 5.52 |
| LOC_Os01g02040.2 | retrotransposon protein, putative, unclassified, expressed                                | Chr1  | 554960   | 558015 -   | 6  | 2800 | 5.52 |
| LOC_Os10g35150.2 | expressed protein                                                                         | Chr10 | 18754181 | 18758096 - | 6  | 1536 | 5.52 |
| LOC_Os04g40300.1 | transglutaminase, putative, expressed                                                     | Chr4  | 23960070 | 23963329 - | 4  | 2039 | 5.52 |
| LOC_Os03g02640.1 | methylthioribose kinase, putative, expressed                                              | Chr3  | 974604   | 978415 +   | 9  | 1626 | 5.52 |
| LOC_Os06g23370.1 | expressed protein                                                                         | Chr6  | 13635895 | 13640070 - | 4  | 3324 | 5.52 |
| LOC_Os01g66590.3 | DUF260 domain containing protein, putative, expressed                                     | Chr1  | 38676217 | 38678410 + | 3  | 1529 | 5.53 |
| LOC_Os12g31490.1 | expressed protein                                                                         | Chr12 | 18938714 | 18943800 - | 6  | 1729 | 5.53 |
| LOC_Os06g06940.1 | S-locus-like receptor protein kinase, putative, expressed                                 | Chr6  | 3294197  | 3296358 -  | 2  | 2143 | 5.53 |
| LOC_Os05g49300.1 | iron-sulfur cluster assembly enzyme ISCU, mitochondrial precursor, putative, expressed    | Chr5  | 28289829 | 28293272 + | 3  | 1073 | 5.53 |
| LOC_Os02g03690.1 | beta-amylase, putative, expressed                                                         | Chr2  | 1539488  | 1548149 +  | 11 | 2758 | 5.53 |
| LOC_Os06g11320.2 | peptidyl-prolyl cis-trans isomerase CYP40, putative, expressed                            | Chr6  | 5933789  | 5939505 -  | 9  | 2064 | 5.53 |
| LOC_Os06g11320.1 | peptidyl-prolyl cis-trans isomerase CYP40, putative, expressed                            | Chr6  | 5933788  | 5939645 -  | 10 | 2153 | 5.53 |

|                  |                                                                                            |       |          |            |    |      |      |
|------------------|--------------------------------------------------------------------------------------------|-------|----------|------------|----|------|------|
| LOC_Os03g51530.1 | expressed protein                                                                          | Chr3  | 29479234 | 29479886 + | 1  | 685  | 5.53 |
| LOC_Os05g36920.1 | histone deacetylase, putative, expressed                                                   | Chr5  | 21562265 | 21565602 - | 4  | 1778 | 5.53 |
| LOC_Os05g46140.2 | expressed protein                                                                          | Chr5  | 26761777 | 26764812 - | 8  | 1370 | 5.53 |
| LOC_Os02g04120.1 | cytidyltransferase domain containing protein, expressed                                    | Chr2  | 1793652  | 1797589 +  | 6  | 1594 | 5.53 |
| LOC_Os03g53000.1 | XRCC4, putative, expressed                                                                 | Chr3  | 30395653 | 30398414 + | 4  | 1314 | 5.53 |
| LOC_Os10g33710.1 | expressed protein                                                                          | Chr10 | 17778502 | 17793342 + | 32 | 5229 | 5.53 |
| LOC_Os05g32680.1 | PAC, putative, expressed                                                                   | Chr5  | 19130324 | 19135942 + | 7  | 1904 | 5.54 |
| LOC_Os03g10820.1 | expressed protein                                                                          | Chr3  | 5547033  | 5551372 -  | 6  | 2017 | 5.54 |
| LOC_Os02g35144.1 | zinc finger, C3HC4 type domain containing protein, expressed                               | Chr2  | 21104634 | 21108056 - | 3  | 1984 | 5.54 |
| LOC_Os04g54790.1 | ELMO/CED-12 family protein, putative, expressed                                            | Chr4  | 32574405 | 32581684 + | 21 | 3270 | 5.54 |
| LOC_Os06g11410.1 | cyclin, putative, expressed                                                                | Chr6  | 6019597  | 6021853 +  | 6  | 1772 | 5.54 |
| LOC_Os06g11410.2 | cyclin, putative, expressed                                                                | Chr6  | 6019597  | 6021861 +  | 5  | 1858 | 5.54 |
| LOC_Os03g06370.2 | PPR repeat domain containing protein, putative, expressed                                  | Chr3  | 3186782  | 3190051 +  | 3  | 2382 | 5.54 |
| LOC_Os03g06370.1 | PPR repeat domain containing protein, putative, expressed                                  | Chr3  | 3186739  | 3190051 +  | 3  | 2428 | 5.54 |
| LOC_Os10g41380.1 | expressed protein                                                                          | Chr10 | 22244074 | 22247190 + | 7  | 1524 | 5.54 |
| LOC_Os06g14060.1 | MBTB10 - Bric-a-Brac, Tramtrack, Broad Complex BTB domain with Meprin and TRAF Homology I  | Chr6  | 7841699  | 7844795 -  | 2  | 2014 | 5.54 |
| LOC_Os06g14060.2 | MBTB10 - Bric-a-Brac, Tramtrack, Broad Complex BTB domain with Meprin and TRAF Homology I  | Chr6  | 7841699  | 7844834 -  | 2  | 2057 | 5.54 |
| LOC_Os04g57154.1 | expressed protein                                                                          | Chr4  | 34059026 | 34064139 - | 3  | 2833 | 5.54 |
| LOC_Os02g05920.1 | phytosulfokine receptor precursor, putative, expressed                                     | Chr2  | 2938046  | 2941648 -  | 1  | 3635 | 5.54 |
| LOC_Os03g34280.2 | expressed protein                                                                          | Chr3  | 19511670 | 19513644 + | 2  | 1092 | 5.54 |
| LOC_Os08g42110.1 | expressed protein                                                                          | Chr8  | 26606691 | 26609538 + | 8  | 1325 | 5.54 |
| LOC_Os02g07870.1 | ATP synthase, putative, expressed                                                          | Chr2  | 4119976  | 4127542 +  | 19 | 3108 | 5.54 |
| LOC_Os12g41140.2 | expressed protein                                                                          | Chr12 | 25487498 | 25492725 - | 6  | 1939 | 5.54 |
| LOC_Os12g41140.3 | expressed protein                                                                          | Chr12 | 25487498 | 25493744 - | 7  | 2265 | 5.54 |
| LOC_Os12g41140.1 | expressed protein                                                                          | Chr12 | 25487500 | 25493744 - | 7  | 2266 | 5.54 |
| LOC_Os09g20010.2 | SNF1-related protein kinase regulatory subunit beta-2, putative, expressed                 | Chr9  | 11985974 | 11989543 + | 3  | 3116 | 5.55 |
| LOC_Os11g42790.1 | transporter, monovalent cation%3Aproton antiporter-2 family, putative, expressed           | Chr11 | 25768465 | 25772569 - | 13 | 2778 | 5.55 |
| LOC_Os04g35610.1 | pentatricopeptide, putative, expressed                                                     | Chr4  | 21703600 | 21705657 - | 1  | 2090 | 5.55 |
| LOC_Os12g42930.1 | expressed protein                                                                          | Chr12 | 26674664 | 26678353 - | 7  | 2546 | 5.55 |
| LOC_Os01g43980.1 | retrotransposon protein, putative, unclassified, expressed                                 | Chr1  | 25203326 | 25210615 + | 8  | 4579 | 5.55 |
| LOC_Os03g23900.1 | expressed protein                                                                          | Chr3  | 13566187 | 13567605 - | 1  | 1451 | 5.55 |
| LOC_Os04g08320.1 | YIF1B, putative, expressed                                                                 | Chr4  | 4441881  | 4444004 -  | 5  | 1509 | 5.55 |
| LOC_Os03g43900.1 | phosphatidylinositol N-acetylglucosaminyltransferase subunit P, putative, expressed        | Chr3  | 24631419 | 24634783 - | 5  | 2559 | 5.55 |
| LOC_Os03g06760.1 | exocyst complex component 6, putative, expressed                                           | Chr3  | 3435736  | 3439544 +  | 2  | 2953 | 5.55 |
| LOC_Os05g34480.2 | expressed protein                                                                          | Chr5  | 20442727 | 20445098 + | 4  | 976  | 5.55 |
| LOC_Os03g42280.1 | B3 DNA binding domain containing protein, expressed                                        | Chr3  | 23523560 | 23528315 + | 5  | 3575 | 5.55 |
| LOC_Os04g55420.1 | leucine-rich repeat family protein, putative, expressed                                    | Chr4  | 32963272 | 32967004 + | 4  | 3561 | 5.55 |
| LOC_Os09g39580.1 | calmodulin-binding heat-shock protein, putative, expressed                                 | Chr9  | 22716054 | 22719930 - | 3  | 3350 | 5.56 |
| LOC_Os01g13390.1 | expressed protein                                                                          | Chr1  | 7457835  | 7459959 +  | 3  | 1178 | 5.56 |
| LOC_Os03g40670.1 | glycerophosphoryl diester phosphodiesterase family protein, putative, expressed            | Chr3  | 22615886 | 22619553 + | 8  | 1848 | 5.56 |
| LOC_Os01g66180.2 | cytochrome c, putative, expressed                                                          | Chr1  | 38443627 | 38445718 + | 3  | 492  | 5.56 |
| LOC_Os05g42270.1 | acyltransferase, putative, expressed                                                       | Chr5  | 24724324 | 24727260 + | 4  | 1677 | 5.56 |
| LOC_Os06g42800.1 | STRUBBELIG-RECEPTOR FAMILY 8 precursor, putative, expressed                                | Chr6  | 25727513 | 25733221 - | 16 | 3356 | 5.56 |
| LOC_Os03g55620.1 | CAMK_CAMK_like_Aur_like.2 - CAMK includes calcium/calmodulin dependent protein kinases, ex | Chr3  | 31674568 | 31678720 + | 5  | 2609 | 5.56 |
| LOC_Os11g17610.1 | expressed protein                                                                          | Chr11 | 9815907  | 9820235 -  | 11 | 1743 | 5.56 |

|                  |                                                                                           |       |          |          |   |    |      |      |
|------------------|-------------------------------------------------------------------------------------------|-------|----------|----------|---|----|------|------|
| LOC_Os05g27930.3 | AP2 domain containing protein, expressed                                                  | Chr5  | 16296914 | 16299840 | - | 2  | 2120 | 5.56 |
| LOC_Os02g49980.1 | ADP-ribosylation factor, putative, expressed                                              | Chr2  | 30533421 | 30536379 | - | 6  | 1154 | 5.56 |
| LOC_Os06g39870.1 | 26S protease regulatory subunit 8, putative, expressed                                    | Chr6  | 23685179 | 23688296 | + | 7  | 1942 | 5.57 |
| LOC_Os05g51060.1 | DNA ligase, putative, expressed                                                           | Chr5  | 29300928 | 29304267 | - | 9  | 1459 | 5.57 |
| LOC_Os03g14130.1 | POEI1 - Pollen Ole e l allergen and extensin family protein precursor, expressed          | Chr3  | 7675743  | 7677125  | - | 2  | 1081 | 5.57 |
| LOC_Os10g41380.2 | expressed protein                                                                         | Chr10 | 22244018 | 22247157 | + | 6  | 1962 | 5.57 |
| LOC_Os01g07110.1 | BRCA2 repeat family protein, expressed                                                    | Chr1  | 3345203  | 3355066  | - | 29 | 5478 | 5.57 |
| LOC_Os10g30870.1 | expressed protein                                                                         | Chr10 | 16096316 | 16098550 | - | 1  | 2267 | 5.57 |
| LOC_Os09g30150.3 | AGC_PVPK_like_kin82y.16 - ACG kinases include homologs to PKA, PKG and PKC, expressed     | Chr9  | 18340474 | 18343614 | + | 3  | 2409 | 5.57 |
| LOC_Os09g30150.1 | AGC_PVPK_like_kin82y.16 - ACG kinases include homologs to PKA, PKG and PKC, expressed     | Chr9  | 18339634 | 18343614 | + | 3  | 2559 | 5.57 |
| LOC_Os10g26520.1 | protein kinase domain containing protein, expressed                                       | Chr10 | 13823476 | 13829535 | + | 6  | 2506 | 5.57 |
| LOC_Os02g27440.2 | DNA topoisomerase 1, putative, expressed                                                  | Chr2  | 16172700 | 16180337 | + | 14 | 3691 | 5.57 |
| LOC_Os05g30900.1 | lipase precursor, putative, expressed                                                     | Chr5  | 17941947 | 17945667 | - | 10 | 2223 | 5.57 |
| LOC_Os11g39670.2 | seryl-tRNA synthetase, putative, expressed                                                | Chr11 | 23628182 | 23632584 | + | 10 | 2656 | 5.57 |
| LOC_Os12g14420.1 | retrotransposon protein, putative, Ty3-gypsy subclass                                     | Chr12 | 8216993  | 8221417  | + | 4  | 3806 | 5.57 |
| LOC_Os03g51890.1 | expressed protein                                                                         | Chr3  | 29749327 | 29755851 | - | 9  | 1365 | 5.57 |
| LOC_Os07g07900.2 | expressed protein                                                                         | Chr7  | 3957966  | 3960638  | - | 1  | 2705 | 5.57 |
| LOC_Os02g27440.4 | DNA topoisomerase 1, putative, expressed                                                  | Chr2  | 16172700 | 16180337 | + | 11 | 4035 | 5.57 |
| LOC_Os05g05740.1 | proline synthetase co-transcribed bacterial homolog protein, putative, expressed          | Chr5  | 2862676  | 2865765  | - | 7  | 1199 | 5.57 |
| LOC_Os03g02480.1 | inner membrane protein, putative, expressed                                               | Chr3  | 906156   | 909933   | + | 10 | 1867 | 5.57 |
| LOC_Os01g62500.1 | OsFtsH3 FtsH protease, homologue of AtFtsH3/10, expressed                                 | Chr1  | 36182449 | 36187998 | - | 8  | 3155 | 5.58 |
| LOC_Os01g14020.1 | expressed protein                                                                         | Chr1  | 7852645  | 7855833  | + | 4  | 1203 | 5.58 |
| LOC_Os04g52074.1 | expressed protein                                                                         | Chr4  | 30927631 | 30934100 | + | 10 | 3626 | 5.58 |
| LOC_Os04g11440.1 | F-box protein interaction domain containing protein, expressed                            | Chr4  | 6255954  | 6258351  | - | 2  | 1704 | 5.58 |
| LOC_Os11g06220.1 | expressed protein                                                                         | Chr11 | 2971115  | 2974447  | + | 2  | 2271 | 5.58 |
| LOC_Os03g47780.1 | WD repeat-containing protein, putative, expressed                                         | Chr3  | 27120029 | 27123813 | + | 11 | 1758 | 5.58 |
| LOC_Os03g47780.2 | WD repeat-containing protein, putative, expressed                                         | Chr3  | 27120029 | 27123813 | + | 11 | 1772 | 5.58 |
| LOC_Os06g20879.2 | expressed protein                                                                         | Chr6  | 12062651 | 12065347 | + | 4  | 2187 | 5.58 |
| LOC_Os10g28040.1 | histone acetyltransferase GCN5, putative, expressed                                       | Chr10 | 14549109 | 14555547 | - | 13 | 2357 | 5.58 |
| LOC_Os01g54590.1 | ras-related protein, putative, expressed                                                  | Chr1  | 31403786 | 31407261 | + | 2  | 1120 | 5.58 |
| LOC_Os03g17140.1 | expressed protein                                                                         | Chr3  | 9519883  | 9521111  | - | 1  | 1261 | 5.58 |
| LOC_Os05g44560.1 | kinesin motor domain containing protein, expressed                                        | Chr5  | 25918485 | 25926076 | - | 21 | 3984 | 5.58 |
| LOC_Os05g34920.1 | expressed protein                                                                         | Chr5  | 20748871 | 20752903 | + | 5  | 2193 | 5.58 |
| LOC_Os07g01140.1 | MBTB12 - Bric-a-Brac, Tramtrack, Broad Complex BTB domain with Meprip and TRAF Homology I | Chr7  | 82397    | 85934    | - | 4  | 1905 | 5.58 |
| LOC_Os03g61630.2 | WD domain, G-beta repeat domain containing protein, expressed                             | Chr3  | 34939266 | 34941366 | + | 2  | 1475 | 5.58 |
| LOC_Os03g61630.1 | WD domain, G-beta repeat domain containing protein, expressed                             | Chr3  | 34939258 | 34941366 | + | 2  | 1488 | 5.58 |
| LOC_Os03g63074.2 | Ser/Thr protein phosphatase family protein, expressed                                     | Chr3  | 35659820 | 35666982 | - | 9  | 4465 | 5.58 |
| LOC_Os03g06710.1 | PPR repeat domain containing protein, putative, expressed                                 | Chr3  | 3407989  | 3413958  | + | 3  | 3229 | 5.59 |
| LOC_Os11g47800.1 | spoOB-associated GTP-binding protein, putative, expressed                                 | Chr11 | 28820765 | 28824245 | + | 5  | 2146 | 5.59 |
| LOC_Os02g49980.2 | ADP-ribosylation factor, putative, expressed                                              | Chr2  | 30533422 | 30536376 | - | 6  | 1172 | 5.59 |
| LOC_Os03g14040.1 | expressed protein                                                                         | Chr3  | 7615918  | 7618928  | + | 6  | 1288 | 5.59 |
| LOC_Os03g14040.3 | expressed protein                                                                         | Chr3  | 7615918  | 7618928  | + | 5  | 1347 | 5.59 |
| LOC_Os07g38830.2 | hydrolase, alpha/beta fold family domain containing protein, expressed                    | Chr7  | 23293347 | 23296803 | + | 9  | 1863 | 5.59 |
| LOC_Os11g05010.2 | heavy-metal-associated domain-containing protein, putative, expressed                     | Chr11 | 2168203  | 2171238  | + | 4  | 2390 | 5.59 |
| LOC_Os03g08800.1 | CutA, chloroplast precursor, putative, expressed                                          | Chr3  | 4543317  | 4544646  | - | 5  | 502  | 5.59 |

|                  |                                                                       |       |          |          |   |    |      |      |
|------------------|-----------------------------------------------------------------------|-------|----------|----------|---|----|------|------|
| LOC_Os05g32590.1 | methyltransferase, putative, expressed                                | Chr5  | 19081004 | 19083368 | + | 8  | 1654 | 5.59 |
| LOC_Os03g62720.3 | exosome complex exonuclease, putative, expressed                      | Chr3  | 35494059 | 35497784 | + | 6  | 1880 | 5.59 |
| LOC_Os03g17710.2 | splicing factor, arginine/serine-rich, putative, expressed            | Chr3  | 9852711  | 9856043  | - | 7  | 1666 | 5.59 |
| LOC_Os03g17710.1 | splicing factor, arginine/serine-rich, putative, expressed            | Chr3  | 9852712  | 9856043  | - | 7  | 1680 | 5.59 |
| LOC_Os04g50700.1 | pathogenesis-related Bet v I family protein, putative, expressed      | Chr4  | 30001482 | 30002546 | + | 2  | 729  | 5.59 |
| LOC_Os04g12540.1 | receptor-like protein kinase, putative, expressed                     | Chr4  | 6939046  | 6942716  | - | 3  | 3129 | 5.59 |
| LOC_Os10g30640.1 | translin, putative, expressed                                         | Chr10 | 15946256 | 15950087 | + | 7  | 1339 | 5.59 |
| LOC_Os02g46520.1 | hydrolase, putative, expressed                                        | Chr2  | 28362823 | 28366935 | + | 10 | 2067 | 5.59 |
| LOC_Os04g54380.1 | aluminum resistance protein, putative, expressed                      | Chr4  | 32359202 | 32362652 | - | 12 | 2409 | 5.59 |
| LOC_Os02g36570.1 | ABC1 family domain containing protein, putative, expressed            | Chr2  | 22077489 | 22085283 | + | 20 | 3498 | 5.59 |
| LOC_Os06g13660.1 | alanyl-tRNA synthetase, putative, expressed                           | Chr6  | 7574978  | 7581553  | + | 12 | 3801 | 5.59 |
| LOC_Os07g48720.1 | MAG2, putative, expressed                                             | Chr7  | 29173992 | 29178326 | + | 4  | 3274 | 5.59 |
| LOC_Os08g35939.1 | expressed protein                                                     | Chr8  | 22660571 | 22670001 | - | 4  | 1872 | 5.59 |
| LOC_Os05g49130.2 | 16S rRNA processing protein RimM containing protein, expressed        | Chr5  | 28183127 | 28188697 | + | 7  | 2976 | 5.59 |
| LOC_Os10g25600.1 | expressed protein                                                     | Chr10 | 13265745 | 13269501 | + | 8  | 1142 | 5.59 |
| LOC_Os02g50640.1 | HEAT repeat family protein, putative, expressed                       | Chr2  | 30930066 | 30934291 | - | 5  | 2825 | 5.59 |
| LOC_Os11g09160.2 | B3 DNA binding domain containing protein, expressed                   | Chr11 | 4894638  | 4901214  | - | 5  | 1671 | 5.59 |
| LOC_Os01g39600.1 | expressed protein                                                     | Chr1  | 22337346 | 22341478 | - | 4  | 3033 | 5.60 |
| LOC_Os02g11030.3 | 50S ribosomal protein L19, chloroplast precursor, putative, expressed | Chr2  | 5906973  | 5909620  | - | 5  | 1187 | 5.60 |
| LOC_Os03g08680.2 | pentatricopeptide, putative, expressed                                | Chr3  | 4470565  | 4476109  | - | 7  | 2108 | 5.60 |
| LOC_Os03g05220.1 | expressed protein                                                     | Chr3  | 2531043  | 2532705  | + | 6  | 967  | 5.60 |
| LOC_Os05g37450.1 | starch binding domain containing protein, putative, expressed         | Chr5  | 21914659 | 21917380 | - | 5  | 2039 | 5.60 |
| LOC_Os05g48150.2 | transposon protein, putative, unclassified, expressed                 | Chr5  | 27602412 | 27605462 | + | 2  | 2639 | 5.60 |
| LOC_Os02g19170.2 | expressed protein                                                     | Chr2  | 11180089 | 11182664 | + | 1  | 2608 | 5.60 |
| LOC_Os02g19170.1 | expressed protein                                                     | Chr2  | 11180083 | 11182664 | + | 2  | 2573 | 5.60 |
| LOC_Os10g31790.1 | ubiquitin family protein, putative, expressed                         | Chr10 | 16665814 | 16673464 | - | 10 | 1843 | 5.60 |
| LOC_Os10g31790.2 | ubiquitin family protein, putative, expressed                         | Chr10 | 16665814 | 16673163 | - | 9  | 1617 | 5.60 |
| LOC_Os09g12720.2 | zinc finger, C3HC4 type domain containing protein, expressed          | Chr9  | 7277192  | 7281256  | - | 3  | 1969 | 5.60 |
| LOC_Os09g12720.1 | zinc finger, C3HC4 type domain containing protein, expressed          | Chr9  | 7277192  | 7282393  | - | 3  | 2342 | 5.60 |
| LOC_Os03g11960.4 | copper/zinc superoxide dismutase, putative, expressed                 | Chr3  | 6273706  | 6275369  | - | 4  | 570  | 5.60 |
| LOC_Os07g48720.3 | MAG2, putative, expressed                                             | Chr7  | 29173992 | 29178470 | + | 4  | 3471 | 5.60 |
| LOC_Os11g05010.1 | heavy-metal-associated domain-containing protein, putative, expressed | Chr11 | 2168333  | 2171238  | + | 4  | 2544 | 5.60 |
| LOC_Os03g42280.2 | B3 DNA binding domain containing protein, expressed                   | Chr3  | 23523494 | 23528315 | + | 4  | 4085 | 5.60 |
| LOC_Os03g24020.1 | ribosomal protein L6, putative, expressed                             | Chr3  | 13627561 | 13630342 | - | 3  | 1152 | 5.60 |
| LOC_Os11g07912.1 | MLO domain containing protein, putative, expressed                    | Chr11 | 4086132  | 4090752  | + | 15 | 2663 | 5.60 |
| LOC_Os02g12660.1 | protein kinase domain containing protein, putative, expressed         | Chr2  | 6609371  | 6614191  | - | 8  | 3249 | 5.60 |
| LOC_Os02g11030.1 | 50S ribosomal protein L19, chloroplast precursor, putative, expressed | Chr2  | 5906973  | 5909620  | - | 6  | 1399 | 5.61 |
| LOC_Os11g39670.1 | seryl-tRNA synthetase, putative, expressed                            | Chr11 | 23628182 | 23632588 | + | 10 | 2653 | 5.61 |
| LOC_Os09g28810.1 | RNA recognition motif containing protein, putative, expressed         | Chr9  | 17499163 | 17503056 | + | 6  | 1557 | 5.61 |
| LOC_Os01g05010.1 | mitochondrial glycoprotein, putative, expressed                       | Chr1  | 2357769  | 2360444  | - | 3  | 1280 | 5.61 |
| LOC_Os04g44590.3 | expressed protein                                                     | Chr4  | 26387544 | 26391345 | + | 5  | 878  | 5.61 |
| LOC_Os03g17340.1 | expressed protein                                                     | Chr3  | 9646750  | 9651687  | - | 9  | 2899 | 5.61 |
| LOC_Os03g05812.1 | expressed protein                                                     | Chr3  | 2907108  | 2912670  | + | 10 | 3932 | 5.61 |
| LOC_Os03g21090.1 | auxin-independent growth promoter protein, putative, expressed        | Chr3  | 12008191 | 12012504 | - | 10 | 2269 | 5.61 |
| LOC_Os12g34890.1 | acyl carrier protein, putative, expressed                             | Chr12 | 21240387 | 21243423 | - | 4  | 1002 | 5.61 |



|                  |                                                                                            |       |          |            |    |      |      |
|------------------|--------------------------------------------------------------------------------------------|-------|----------|------------|----|------|------|
| LOC_Os01g56230.5 | transmembrane protein 56, putative, expressed                                              | Chr1  | 32381210 | 32385694 - | 9  | 1736 | 5.61 |
| LOC_Os03g31320.2 | RING zinc finger protein-like, putative, expressed                                         | Chr3  | 17850489 | 17853739 - | 2  | 1582 | 5.61 |
| LOC_Os03g26000.1 | expressed protein                                                                          | Chr3  | 14899827 | 14906973 + | 12 | 4529 | 5.61 |
| LOC_Os06g08910.2 | glutamate receptor 2.8 precursor, putative, expressed                                      | Chr6  | 4489429  | 4493878 -  | 6  | 2606 | 5.61 |
| LOC_Os02g11030.2 | 50S ribosomal protein L19, chloroplast precursor, putative, expressed                      | Chr2  | 5906973  | 5909620 -  | 5  | 1447 | 5.61 |
| LOC_Os12g39380.1 | BTBN24 - Bric-a-Brac, Tramtrack, Broad Complex BTB domain with non-phototropic hypocotyl 3 | Chr12 | 24218359 | 24224963 - | 5  | 3233 | 5.61 |
| LOC_Os01g42470.2 | acetyltransferase, GNAT family, putative, expressed                                        | Chr1  | 24145843 | 24149003 + | 4  | 1144 | 5.61 |
| LOC_Os02g05199.6 | expressed protein                                                                          | Chr2  | 2486465  | 2488965 +  | 4  | 2260 | 5.62 |
| LOC_Os02g14980.1 | calcium-binding EF hand family protein, putative, expressed                                | Chr2  | 8358769  | 8362960 +  | 7  | 2593 | 5.62 |
| LOC_Os02g14980.2 | calcium-binding EF hand family protein, putative, expressed                                | Chr2  | 8359318  | 8362959 +  | 6  | 2602 | 5.62 |
| LOC_Os11g05010.3 | heavy-metal-associated domain-containing protein, putative, expressed                      | Chr11 | 2168337  | 2171238 +  | 3  | 2637 | 5.62 |
| LOC_Os05g51450.1 | OsClp8 - Putative Clp protease homologue, expressed                                        | Chr5  | 29495797 | 29499479 - | 9  | 1965 | 5.62 |
| LOC_Os06g40630.1 | SFT2, putative, expressed                                                                  | Chr6  | 24223752 | 24226794 + | 4  | 1318 | 5.62 |
| LOC_Os12g01290.1 | ulp1 protease family protein, putative, expressed                                          | Chr12 | 165073   | 169377 +   | 8  | 2545 | 5.62 |
| LOC_Os05g38160.1 | prenylated rab acceptor, putative, expressed                                               | Chr5  | 22384138 | 22387807 + | 8  | 1456 | 5.62 |
| LOC_Os03g48090.1 | WD domain, G-beta repeat domain containing protein, expressed                              | Chr3  | 27347078 | 27351216 - | 11 | 2137 | 5.62 |
| LOC_Os03g31320.1 | RING zinc finger protein-like, putative, expressed                                         | Chr3  | 17850489 | 17853697 - | 3  | 1693 | 5.62 |
| LOC_Os02g02110.1 | Alg9-like mannosyltransferase protein, putative, expressed                                 | Chr2  | 623174   | 628425 +   | 8  | 2833 | 5.62 |
| LOC_Os01g42470.1 | acetyltransferase, GNAT family, putative, expressed                                        | Chr1  | 24145843 | 24149002 + | 3  | 1177 | 5.62 |
| LOC_Os06g12530.1 | CS domain containing protein, putative, expressed                                          | Chr6  | 6794150  | 6796570 +  | 6  | 1475 | 5.62 |
| LOC_Os02g54490.1 | nucleotide binding protein, putative, expressed                                            | Chr2  | 33364263 | 33370987 + | 19 | 2963 | 5.63 |
| LOC_Os05g32120.1 | alpha 1,3-xylosyltransferase, putative, expressed                                          | Chr5  | 18728868 | 18731335 + | 4  | 1187 | 5.63 |
| LOC_Os04g32090.1 | expressed protein                                                                          | Chr4  | 19240380 | 19245971 - | 9  | 3038 | 5.63 |
| LOC_Os06g20879.1 | expressed protein                                                                          | Chr6  | 12062651 | 12065299 + | 2  | 2531 | 5.63 |
| LOC_Os03g05812.3 | expressed protein                                                                          | Chr3  | 2907108  | 2912672 +  | 11 | 3726 | 5.63 |
| LOC_Os03g62250.1 | zinc finger, C3HC4 type domain containing protein, expressed                               | Chr3  | 35256091 | 35264427 - | 16 | 2624 | 5.63 |
| LOC_Os03g63090.1 | actin-related protein 2/3 complex subunit 4, putative, expressed                           | Chr3  | 35669657 | 35672795 + | 8  | 1580 | 5.63 |
| LOC_Os07g03070.1 | tetratricopeptide repeat containing protein, putative, expressed                           | Chr7  | 1165793  | 1169606 +  | 6  | 1956 | 5.63 |
| LOC_Os04g01740.1 | heat shock protein, putative, expressed                                                    | Chr4  | 483241   | 486065 +   | 3  | 2680 | 5.63 |
| LOC_Os01g08550.1 | aminoacyl-tRNA synthetase, putative, expressed                                             | Chr1  | 4245417  | 4249851 -  | 11 | 2320 | 5.63 |
| LOC_Os03g19510.1 | OsClp4 - Putative Clp protease homologue, expressed                                        | Chr3  | 10966698 | 10969826 - | 9  | 1638 | 5.63 |
| LOC_Os05g11140.3 | CK1_CaseinKinase_1a.5 - CK1 includes the casein kinase 1 kinases, expressed                | Chr5  | 6272686  | 6282566 -  | 17 | 3133 | 5.63 |
| LOC_Os05g11140.1 | CK1_CaseinKinase_1a.5 - CK1 includes the casein kinase 1 kinases, expressed                | Chr5  | 6272686  | 6282566 -  | 16 | 3052 | 5.63 |
| LOC_Os06g48200.1 | glycosyl hydrolases family 16, putative, expressed                                         | Chr6  | 29156425 | 29157883 - | 3  | 1390 | 5.63 |
| LOC_Os05g22670.1 | transcription factor IIA large subunit, putative, expressed                                | Chr5  | 12865904 | 12872403 + | 11 | 2084 | 5.63 |
| LOC_Os01g73430.1 | RNA polymerase IV largest subunit, putative, expressed                                     | Chr1  | 42549843 | 42556862 - | 18 | 5289 | 5.63 |
| LOC_Os01g56230.1 | transmembrane protein 56, putative, expressed                                              | Chr1  | 32381210 | 32385675 - | 9  | 1756 | 5.63 |
| LOC_Os01g56230.2 | transmembrane protein 56, putative, expressed                                              | Chr1  | 32381210 | 32385675 - | 9  | 1761 | 5.63 |
| LOC_Os01g61690.1 | OsSCP5 - Putative Serine Carboxypeptidase homologue, expressed                             | Chr1  | 35688056 | 35691686 - | 9  | 2552 | 5.63 |
| LOC_Os04g57320.2 | immutans protein, putative, expressed                                                      | Chr4  | 34122822 | 34125914 - | 7  | 2095 | 5.63 |
| LOC_Os04g57320.1 | immutans protein, putative, expressed                                                      | Chr4  | 34122822 | 34125935 - | 9  | 1973 | 5.63 |
| LOC_Os03g62690.1 | pentatricopeptide, putative, expressed                                                     | Chr3  | 35474093 | 35479956 + | 14 | 4370 | 5.63 |
| LOC_Os02g56014.1 | 40S ribosomal protein S30, putative, expressed                                             | Chr2  | 34295821 | 34296468 - | 2  | 601  | 5.63 |
| LOC_Os01g62860.1 | oxidoreductase, aldo/keto reductase family protein, putative, expressed                    | Chr1  | 36403442 | 36407380 + | 7  | 1604 | 5.64 |
| LOC_Os04g57190.1 | ubiquitin carboxyl-terminal hydrolase, family 1, putative, expressed                       | Chr4  | 34074001 | 34077291 - | 9  | 1443 | 5.64 |

|                  |                                                                                             |       |          |          |   |    |      |      |
|------------------|---------------------------------------------------------------------------------------------|-------|----------|----------|---|----|------|------|
| LOC_Os07g47260.1 | H-BTB7 - Bric-a-Brac, Tramtrack, Broad Complex BTB domain with H family conserved sequence, | Chr7  | 28247341 | 28249707 | + | 1  | 2399 | 5.64 |
| LOC_Os12g33210.1 | OsFBL59 - F-box domain and LRR containing protein, expressed                                | Chr12 | 20084212 | 20088112 | + | 3  | 2865 | 5.64 |
| LOC_Os08g02670.1 | ATP binding protein, putative, expressed                                                    | Chr8  | 1111277  | 1115786  | + | 6  | 3076 | 5.64 |
| LOC_Os01g42510.2 | expressed protein                                                                           | Chr1  | 24168245 | 24171441 | - | 5  | 830  | 5.64 |
| LOC_Os02g35000.1 | chaperone protein dnaJ 10, putative, expressed                                              | Chr2  | 20994336 | 20997195 | - | 10 | 2189 | 5.64 |
| LOC_Os02g45590.1 | PPR repeat domain containing protein, putative, expressed                                   | Chr2  | 27735847 | 27740939 | - | 6  | 2562 | 5.64 |
| LOC_Os05g16640.1 | DUF630/DUF632 domains containing protein, putative, expressed                               | Chr5  | 9438726  | 9443681  | + | 6  | 3031 | 5.64 |
| LOC_Os08g27040.1 | lipid phosphatase protein, putative, expressed                                              | Chr8  | 16519419 | 16523966 | - | 9  | 1992 | 5.64 |
| LOC_Os01g56230.4 | transmembrane protein 56, putative, expressed                                               | Chr1  | 32381210 | 32385675 | - | 8  | 1814 | 5.64 |
| LOC_Os03g16870.1 | expressed protein                                                                           | Chr3  | 9373153  | 9375798  | - | 9  | 1858 | 5.64 |
| LOC_Os11g04230.1 | transcription initiation factor, putative, expressed                                        | Chr11 | 1739120  | 1741886  | + | 7  | 1227 | 5.64 |
| LOC_Os12g31830.1 | nitrilase, putative, expressed                                                              | Chr12 | 19151192 | 19156207 | + | 9  | 1887 | 5.64 |
| LOC_Os07g03130.1 | PDV2, putative, expressed                                                                   | Chr7  | 1199188  | 1201376  | - | 2  | 1291 | 5.64 |
| LOC_Os03g38500.1 | expressed protein                                                                           | Chr3  | 21371243 | 21375804 | + | 4  | 792  | 5.64 |
| LOC_Os06g40960.1 | ZOS6-05 - C2H2 zinc finger protein, expressed                                               | Chr6  | 24453131 | 24456495 | + | 2  | 2023 | 5.65 |
| LOC_Os01g02040.1 | retrotransposon protein, putative, unclassified, expressed                                  | Chr1  | 554022   | 558015   | - | 8  | 3341 | 5.65 |
| LOC_Os02g27440.3 | DNA topoisomerase 1, putative, expressed                                                    | Chr2  | 16172700 | 16180337 | + | 12 | 4503 | 5.65 |
| LOC_Os05g08440.1 | OsFBX163 - F-box domain containing protein, expressed                                       | Chr5  | 4610870  | 4612756  | + | 2  | 1863 | 5.65 |
| LOC_Os01g68490.1 | tetratricopeptide-like helical, putative, expressed                                         | Chr1  | 39794226 | 39799341 | - | 3  | 4136 | 5.65 |
| LOC_Os03g20460.2 | guanylate kinase, putative, expressed                                                       | Chr3  | 11595454 | 11599057 | + | 3  | 1539 | 5.65 |
| LOC_Os03g20460.1 | guanylate kinase, putative, expressed                                                       | Chr3  | 11595453 | 11599060 | + | 4  | 1475 | 5.65 |
| LOC_Os11g40090.1 | A49-like RNA polymerase I associated factor family protein, expressed                       | Chr11 | 23909865 | 23913312 | + | 4  | 1931 | 5.65 |
| LOC_Os01g05105.1 | expressed protein                                                                           | Chr1  | 2393480  | 2398292  | + | 1  | 4845 | 5.65 |
| LOC_Os02g10740.1 | calcium-binding mitochondrial carrier CBG00135, putative, expressed                         | Chr2  | 5663004  | 5668429  | - | 5  | 3086 | 5.65 |
| LOC_Os05g15160.1 | phosphate/phosphate translocator, putative, expressed                                       | Chr5  | 8600456  | 8609826  | + | 12 | 2063 | 5.65 |
| LOC_Os04g03980.1 | flavin monooxygenase, putative, expressed                                                   | Chr4  | 1813950  | 1816073  | - | 2  | 2093 | 5.65 |
| LOC_Os08g29170.1 | dehydrogenase, putative, expressed                                                          | Chr8  | 17855514 | 17857688 | - | 4  | 2005 | 5.65 |
| LOC_Os03g52320.2 | GRF-interacting factor 1, putative, expressed                                               | Chr3  | 30045079 | 30047237 | - | 4  | 1345 | 5.65 |
| LOC_Os11g21920.1 | transposon protein, putative, CACTA, En/Spm sub-class                                       | Chr11 | 12580306 | 12580692 | - | 1  | 419  | 5.65 |
| LOC_Os03g40260.1 | Regulator of chromosome condensation domain containing protein, expressed                   | Chr3  | 22372924 | 22380193 | + | 9  | 2382 | 5.65 |
| LOC_Os02g42910.1 | expressed protein                                                                           | Chr2  | 25805953 | 25813565 | - | 10 | 5876 | 5.65 |
| LOC_Os06g45590.1 | glyceraldehyde-3-phosphate dehydrogenase, putative, expressed                               | Chr6  | 27601120 | 27605337 | - | 14 | 2199 | 5.65 |
| LOC_Os08g38270.1 | fasciclin domain containing protein, expressed                                              | Chr8  | 24252684 | 24253935 | + | 1  | 1284 | 5.65 |
| LOC_Os01g54040.1 | ATP-dependent protease La, putative, expressed                                              | Chr1  | 31078609 | 31088007 | - | 11 | 2629 | 5.65 |
| LOC_Os02g02890.1 | peptidyl-prolyl cis-trans isomerase, putative, expressed                                    | Chr2  | 1116059  | 1117136  | + | 1  | 1110 | 5.66 |
| LOC_Os03g62690.2 | pentatricopeptide, putative, expressed                                                      | Chr3  | 35474092 | 35479977 | + | 11 | 5003 | 5.66 |
| LOC_Os10g28640.1 | RIO1 family protein, expressed                                                              | Chr10 | 14925735 | 14929778 | + | 7  | 2669 | 5.66 |
| LOC_Os06g13720.1 | dehydrogenase E1 component domain containing protein, expressed                             | Chr6  | 7602364  | 7605812  | + | 8  | 1947 | 5.66 |
| LOC_Os11g40090.2 | A49-like RNA polymerase I associated factor family protein, expressed                       | Chr11 | 23909865 | 23913312 | + | 4  | 1964 | 5.66 |
| LOC_Os08g29615.1 | expressed protein                                                                           | Chr8  | 18168729 | 18172239 | + | 3  | 2704 | 5.66 |
| LOC_Os02g21580.1 | PPR repeat containing protein, expressed                                                    | Chr2  | 12815514 | 12817130 | - | 2  | 1642 | 5.66 |
| LOC_Os01g57410.3 | pentatricopeptide repeat domain containing protein, putative, expressed                     | Chr1  | 33182589 | 33186170 | + | 3  | 3112 | 5.66 |
| LOC_Os03g58830.1 | BEE 1, putative, expressed                                                                  | Chr3  | 33500880 | 33505048 | - | 6  | 1474 | 5.66 |
| LOC_Os03g61280.1 | OsMan05 - Endo-Beta-Mannanase, expressed                                                    | Chr3  | 34798312 | 34800854 | + | 3  | 2452 | 5.66 |
| LOC_Os11g02630.1 | expressed protein                                                                           | Chr11 | 837783   | 839909   | - | 1  | 2159 | 5.66 |

|                  |                                                                             |       |          |            |    |      |      |
|------------------|-----------------------------------------------------------------------------|-------|----------|------------|----|------|------|
| LOC_Os01g68510.1 | peptide transporter PTR2, putative, expressed                               | Chr1  | 39810303 | 39815206 + | 4  | 2445 | 5.66 |
| LOC_Os07g42880.1 | PPR repeat containing protein, expressed                                    | Chr7  | 25672201 | 25674075 + | 1  | 1907 | 5.66 |
| LOC_Os02g05199.2 | expressed protein                                                           | Chr2  | 2486465  | 2488967 +  | 3  | 2243 | 5.66 |
| LOC_Os02g05199.4 | expressed protein                                                           | Chr2  | 2486465  | 2488967 +  | 4  | 2192 | 5.66 |
| LOC_Os04g57790.1 | ubiquinone biosynthesis protein COQ4, putative, expressed                   | Chr4  | 34413441 | 34415644 + | 3  | 1282 | 5.66 |
| LOC_Os12g07800.1 | S-locus-like receptor protein kinase, putative, expressed                   | Chr12 | 3938882  | 3943936 +  | 3  | 2860 | 5.66 |
| LOC_Os12g01570.1 | nodulin, putative, expressed                                                | Chr12 | 345084   | 349145 +   | 3  | 1851 | 5.67 |
| LOC_Os11g01594.1 | expressed protein                                                           | Chr11 | 345960   | 347658 -   | 3  | 968  | 5.67 |
| LOC_Os01g07540.1 | G-patch domain containing protein, expressed                                | Chr1  | 3610392  | 3615764 +  | 10 | 1881 | 5.67 |
| LOC_Os05g36090.1 | zinc finger DHHC domain-containing protein, putative, expressed             | Chr5  | 21388694 | 21392697 + | 5  | 2127 | 5.67 |
| LOC_Os01g54040.3 | ATP-dependent protease La, putative, expressed                              | Chr1  | 31078609 | 31088007 - | 12 | 2783 | 5.67 |
| LOC_Os09g31220.6 | expressed protein                                                           | Chr9  | 18779539 | 18782063 - | 5  | 1300 | 5.67 |
| LOC_Os01g65830.1 | acyl-desaturase, chloroplast precursor, putative, expressed                 | Chr1  | 38224419 | 38226031 + | 2  | 1591 | 5.67 |
| LOC_Os08g10410.1 | expressed protein                                                           | Chr8  | 6112375  | 6115664 -  | 6  | 1766 | 5.67 |
| LOC_Os02g44970.1 | expressed protein                                                           | Chr2  | 27238657 | 27240720 - | 1  | 2096 | 5.67 |
| LOC_Os05g34290.1 | glutathione gamma-glutamylcysteinyltransferase 1, putative, expressed       | Chr5  | 20302077 | 20304710 + | 5  | 1599 | 5.67 |
| LOC_Os03g56320.2 | expressed protein                                                           | Chr3  | 32107038 | 32109990 + | 7  | 2086 | 5.67 |
| LOC_Os02g03060.1 | cyclin-dependent kinase A-2, putative, expressed                            | Chr2  | 1207635  | 1211226 +  | 7  | 1698 | 5.67 |
| LOC_Os03g14400.1 | cytochrome P450, putative, expressed                                        | Chr3  | 7831876  | 7833791 -  | 2  | 1851 | 5.67 |
| LOC_Os05g03050.1 | DNA repair protein Rad51, putative, expressed                               | Chr5  | 1186090  | 1190655 -  | 12 | 1826 | 5.67 |
| LOC_Os06g49450.3 | expressed protein                                                           | Chr6  | 29961036 | 29967489 + | 10 | 2487 | 5.67 |
| LOC_Os01g54540.2 | ribosomal protein L13, putative, expressed                                  | Chr1  | 31367015 | 31369416 + | 4  | 1200 | 5.67 |
| LOC_Os07g38830.1 | hydrolase, alpha/beta fold family domain containing protein, expressed      | Chr7  | 23293331 | 23296804 + | 9  | 1931 | 5.67 |
| LOC_Os03g09090.1 | expressed protein                                                           | Chr3  | 4720645  | 4724099 -  | 8  | 2088 | 5.67 |
| LOC_Os02g57380.1 | thioredoxin, putative, expressed                                            | Chr2  | 35158955 | 35161544 + | 5  | 1470 | 5.67 |
| LOC_Os06g30710.2 | DGCR14, putative, expressed                                                 | Chr6  | 17812058 | 17815614 + | 2  | 1949 | 5.67 |
| LOC_Os12g41230.1 | tesmin/TSO1-like CXC domain containing protein, expressed                   | Chr12 | 25561750 | 25569052 - | 11 | 3427 | 5.67 |
| LOC_Os12g41230.2 | tesmin/TSO1-like CXC domain containing protein, expressed                   | Chr12 | 25561750 | 25569052 - | 11 | 3453 | 5.67 |
| LOC_Os12g41230.3 | tesmin/TSO1-like CXC domain containing protein, expressed                   | Chr12 | 25561750 | 25569052 - | 10 | 3497 | 5.67 |
| LOC_Os05g49130.1 | 16S rRNA processing protein RimM containing protein, expressed              | Chr5  | 28183127 | 28188697 + | 6  | 3424 | 5.67 |
| LOC_Os09g30466.1 | nuclear ribonuclease Z, putative, expressed                                 | Chr9  | 18565965 | 18569125 - | 8  | 1703 | 5.68 |
| LOC_Os02g05199.3 | expressed protein                                                           | Chr2  | 2486465  | 2488967 +  | 4  | 2309 | 5.68 |
| LOC_Os02g05199.1 | expressed protein                                                           | Chr2  | 2486465  | 2488967 +  | 4  | 2312 | 5.68 |
| LOC_Os12g02950.1 | EMB2748, putative, expressed                                                | Chr12 | 1093738  | 1096564 -  | 7  | 1538 | 5.68 |
| LOC_Os12g02385.1 | outer membrane protein, OMP85 family, putative, expressed                   | Chr12 | 780039   | 783513 -   | 8  | 2552 | 5.68 |
| LOC_Os07g39460.1 | transposon protein, putative, unclassified, expressed                       | Chr7  | 23633878 | 23643200 - | 13 | 3623 | 5.68 |
| LOC_Os03g47990.1 | OB-fold nucleic acid binding domain containing protein, putative, expressed | Chr3  | 27283074 | 27286338 + | 4  | 1184 | 5.68 |
| LOC_Os01g69060.1 | hydrolase, alpha/beta fold family domain containing protein, expressed      | Chr1  | 40133062 | 40138351 + | 15 | 2341 | 5.68 |
| LOC_Os07g38940.1 | ubiquitin-conjugating enzyme, putative, expressed                           | Chr7  | 23349422 | 23352488 + | 4  | 1057 | 5.68 |
| LOC_Os03g23920.1 | expressed protein                                                           | Chr3  | 13575806 | 13577233 - | 1  | 1460 | 5.68 |
| LOC_Os04g48140.1 | methyltransferase, putative, expressed                                      | Chr4  | 28645797 | 28649459 - | 7  | 1985 | 5.68 |
| LOC_Os01g07280.1 | disease resistance protein, putative, expressed                             | Chr1  | 3431606  | 3435618 -  | 5  | 3112 | 5.68 |
| LOC_Os02g53120.1 | Peptidase family C50, putative, expressed                                   | Chr2  | 32499211 | 32507151 - | 12 | 4110 | 5.68 |
| LOC_Os02g03060.2 | cyclin-dependent kinase A-2, putative, expressed                            | Chr2  | 1207635  | 1211226 +  | 6  | 1775 | 5.68 |
| LOC_Os04g33810.1 | RNA recognition motif containing protein, putative, expressed               | Chr4  | 20484158 | 20485720 + | 4  | 1133 | 5.68 |

|                  |                                                                                             |       |          |          |   |    |      |      |
|------------------|---------------------------------------------------------------------------------------------|-------|----------|----------|---|----|------|------|
| LOC_Os01g54540.1 | ribosomal protein L13, putative, expressed                                                  | Chr1  | 31367015 | 31369416 | + | 4  | 1215 | 5.68 |
| LOC_Os02g05199.5 | expressed protein                                                                           | Chr2  | 2486465  | 2488967  | + | 2  | 2414 | 5.68 |
| LOC_Os12g04260.1 | astaxanthin synthase KC28, putative, expressed                                              | Chr12 | 1802706  | 1807516  | + | 13 | 2092 | 5.68 |
| LOC_Os01g53060.1 | peroxisomal membrane protein, putative, expressed                                           | Chr1  | 30488174 | 30490501 | + | 6  | 1480 | 5.68 |
| LOC_Os05g01460.2 | STIP1 homology and U box-containing protein 1, putative, expressed                          | Chr5  | 263744   | 266445   | - | 5  | 1787 | 5.68 |
| LOC_Os09g20910.1 | expressed protein                                                                           | Chr9  | 12582819 | 12590857 | - | 16 | 3914 | 5.68 |
| LOC_Os03g11210.1 | DUF538 domain containing protein, putative, expressed                                       | Chr3  | 5769927  | 5772647  | + | 3  | 1177 | 5.69 |
| LOC_Os11g16430.1 | diphthamide biosynthesis protein, putative, expressed                                       | Chr11 | 9089498  | 9095181  | + | 11 | 2330 | 5.69 |
| LOC_Os04g47680.1 | Ser/Thr-rich protein T10 in DGCR region, putative, expressed                                | Chr4  | 28290100 | 28292275 | + | 4  | 1462 | 5.69 |
| LOC_Os01g19140.1 | O-sialoglycoprotein endopeptidase, putative, expressed                                      | Chr1  | 10813997 | 10818530 | - | 10 | 1625 | 5.69 |
| LOC_Os10g21198.1 | photosystem II reaction center protein K precursor, putative, expressed                     | Chr10 | 10814227 | 10814412 | + | 1  | 218  | 5.69 |
| LOC_Os01g39020.1 | HSF-type DNA-binding domain containing protein, expressed                                   | Chr1  | 21938865 | 21941839 | + | 2  | 1633 | 5.69 |
| LOC_Os10g35290.1 | DNA-directed RNA polymerase I subunit RPA2, putative, expressed                             | Chr10 | 18857786 | 18867383 | - | 24 | 4211 | 5.69 |
| LOC_Os12g43930.1 | zinc finger, C3HC4 type domain containing protein, expressed                                | Chr12 | 27263719 | 27265922 | + | 2  | 1291 | 5.69 |
| LOC_Os04g42880.1 | WD domain, G-beta repeat domain containing protein, expressed                               | Chr4  | 25374638 | 25376829 | + | 2  | 1619 | 5.69 |
| LOC_Os04g57190.3 | ubiquitin carboxyl-terminal hydrolase, family 1, putative, expressed                        | Chr4  | 34074001 | 34077291 | - | 8  | 1584 | 5.69 |
| LOC_Os07g46300.1 | expressed protein                                                                           | Chr7  | 27620767 | 27623656 | + | 3  | 2738 | 5.69 |
| LOC_Os10g34030.1 | zinc finger, C3HC4 type domain containing protein, expressed                                | Chr10 | 18150496 | 18156384 | - | 11 | 1367 | 5.69 |
| LOC_Os03g56320.1 | expressed protein                                                                           | Chr3  | 32107038 | 32109990 | + | 6  | 2133 | 5.69 |
| LOC_Os01g12660.1 | AAA-type ATPase family protein, putative, expressed                                         | Chr1  | 6970861  | 6976710  | - | 15 | 3447 | 5.69 |
| LOC_Os05g43820.2 | ras-related protein, putative, expressed                                                    | Chr5  | 25474799 | 25478182 | + | 6  | 2834 | 5.69 |
| LOC_Os08g40420.1 | ternary complex factor MIP1, putative, expressed                                            | Chr8  | 25584780 | 25590222 | + | 12 | 3977 | 5.69 |
| LOC_Os01g55120.1 | expressed protein                                                                           | Chr1  | 31718042 | 31719808 | - | 1  | 1799 | 5.69 |
| LOC_Os07g23720.1 | B4-BTB4 - Bric-a-Brac, Tramtrack, Broad Complex BTB domain with B4 subfamily conserved sequ | Chr7  | 13384446 | 13386049 | + | 1  | 1636 | 5.69 |
| LOC_Os01g51754.2 | alpha-amylase precursor, putative, expressed                                                | Chr1  | 29760719 | 29770037 | + | 11 | 4622 | 5.69 |
| LOC_Os02g56040.1 | chaperone protein dnaJ, putative, expressed                                                 | Chr2  | 34300624 | 34307729 | - | 11 | 2418 | 5.69 |
| LOC_Os09g30100.2 | NOL1/NOP2/sun family protein, putative, expressed                                           | Chr9  | 18293017 | 18300990 | + | 19 | 2374 | 5.70 |
| LOC_Os01g53060.2 | peroxisomal membrane protein, putative, expressed                                           | Chr1  | 30488184 | 30490499 | + | 5  | 1648 | 5.70 |
| LOC_Os06g48610.1 | CCT motif family protein, expressed                                                         | Chr6  | 29407744 | 29412038 | + | 3  | 3232 | 5.70 |
| LOC_Os05g44590.5 | ATP-dependent protease La, putative, expressed                                              | Chr5  | 25942431 | 25946904 | + | 8  | 2219 | 5.70 |
| LOC_Os09g15170.1 | nucleobase-ascorbate transporter, putative, expressed                                       | Chr9  | 9206558  | 9211740  | + | 14 | 2992 | 5.70 |
| LOC_Os05g24140.1 | tetracycline transporter-like protein 1, putative, expressed                                | Chr5  | 13927672 | 13929113 | + | 6  | 1057 | 5.70 |
| LOC_Os10g40824.1 | expressed protein                                                                           | Chr10 | 21953518 | 21955536 | + | 1  | 2051 | 5.70 |
| LOC_Os08g40420.2 | ternary complex factor MIP1, putative, expressed                                            | Chr8  | 25584780 | 25590222 | + | 11 | 4096 | 5.70 |
| LOC_Os02g58230.1 | C2 domain containing protein, putative, expressed                                           | Chr2  | 35643004 | 35647999 | - | 8  | 2651 | 5.70 |
| LOC_Os02g58230.2 | C2 domain containing protein, putative, expressed                                           | Chr2  | 35643004 | 35648165 | - | 8  | 1902 | 5.70 |
| LOC_Os04g31820.1 | expressed protein                                                                           | Chr4  | 19061844 | 19062053 | - | 1  | 242  | 5.70 |
| LOC_Os04g30420.1 | dehydrogenase, putative, expressed                                                          | Chr4  | 18168723 | 18172037 | + | 4  | 1554 | 5.70 |
| LOC_Os03g63670.1 | expressed protein                                                                           | Chr3  | 35964861 | 35968404 | - | 2  | 3509 | 5.70 |
| LOC_Os03g63670.2 | expressed protein                                                                           | Chr3  | 35964865 | 35968404 | - | 2  | 3509 | 5.70 |
| LOC_Os11g06370.1 | expressed protein                                                                           | Chr11 | 3063521  | 3066036  | - | 2  | 1582 | 5.70 |
| LOC_Os01g34610.1 | expressed protein                                                                           | Chr1  | 19079248 | 19083485 | + | 6  | 2050 | 5.70 |
| LOC_Os07g32590.1 | peptidase, M24 family protein, putative, expressed                                          | Chr7  | 19427900 | 19432234 | + | 11 | 1949 | 5.70 |
| LOC_Os06g10140.1 | expressed protein                                                                           | Chr6  | 5186447  | 5188307  | - | 3  | 1702 | 5.71 |
| LOC_Os03g14030.2 | thaumatin, putative, expressed                                                              | Chr3  | 7612483  | 7614083  | - | 2  | 1557 | 5.71 |

|                  |                                                                                                 |       |          |            |    |      |      |
|------------------|-------------------------------------------------------------------------------------------------|-------|----------|------------|----|------|------|
| LOC_Os06g46540.1 | cell division cycle protein 23, putative, expressed                                             | Chr6  | 28256523 | 28260340 + | 6  | 2092 | 5.71 |
| LOC_Os05g01710.1 | transcription initiation factor IIA gamma chain, putative, expressed                            | Chr5  | 437013   | 443270 +   | 4  | 1064 | 5.71 |
| LOC_Os05g01710.2 | transcription initiation factor IIA gamma chain, putative, expressed                            | Chr5  | 437013   | 443270 +   | 4  | 972  | 5.71 |
| LOC_Os05g01710.3 | transcription initiation factor IIA gamma chain, putative, expressed                            | Chr5  | 437010   | 443270 +   | 4  | 970  | 5.71 |
| LOC_Os06g33530.1 | protein phosphatase 2C, putative, expressed                                                     | Chr6  | 19526780 | 19529692 - | 7  | 1557 | 5.71 |
| LOC_Os01g57410.2 | pentatricopeptide repeat domain containing protein, putative, expressed                         | Chr1  | 33182589 | 33186170 + | 2  | 3205 | 5.71 |
| LOC_Os03g61570.2 | expressed protein                                                                               | Chr3  | 34913404 | 34914861 + | 3  | 1336 | 5.71 |
| LOC_Os03g61570.1 | expressed protein                                                                               | Chr3  | 34913404 | 34914861 + | 1  | 1490 | 5.71 |
| LOC_Os04g02140.1 | transposon protein, putative, CACTA, En/Spm sub-class, expressed                                | Chr4  | 706797   | 711491 -   | 14 | 2406 | 5.71 |
| LOC_Os08g25390.2 | bifunctional aspartokinase/homoserine dehydrogenase, chloroplast precursor, putative, expressed | Chr8  | 15441219 | 15450607 - | 16 | 3235 | 5.71 |
| LOC_Os12g43590.1 | FAD dependent oxidoreductase domain containing protein, expressed                               | Chr12 | 27051917 | 27056972 - | 16 | 2810 | 5.71 |
| LOC_Os07g08880.2 | ES43 protein, putative, expressed                                                               | Chr7  | 4606679  | 4614598 +  | 5  | 1376 | 5.71 |
| LOC_Os07g08880.1 | ES43 protein, putative, expressed                                                               | Chr7  | 4606679  | 4614599 +  | 5  | 1380 | 5.71 |
| LOC_Os07g08880.3 | ES43 protein, putative, expressed                                                               | Chr7  | 4606679  | 4614599 +  | 5  | 1361 | 5.71 |
| LOC_Os06g44540.1 | HOTHEAD precursor, putative, expressed                                                          | Chr6  | 26904391 | 26908175 + | 5  | 2371 | 5.71 |
| LOC_Os07g29290.1 | expansin precursor, putative, expressed                                                         | Chr7  | 17161995 | 17165698 - | 5  | 1775 | 5.71 |
| LOC_Os12g32670.1 | CC-NBS-LRR resistance protein, putative, expressed                                              | Chr12 | 19716108 | 19719992 - | 2  | 3466 | 5.71 |
| LOC_Os04g53630.1 | pentatricopeptide, putative, expressed                                                          | Chr4  | 31966462 | 31968300 + | 2  | 1744 | 5.71 |
| LOC_Os08g02360.1 | exosome complex exonuclease, putative, expressed                                                | Chr8  | 936009   | 940477 -   | 7  | 1369 | 5.71 |
| LOC_Os02g44740.2 | expressed protein                                                                               | Chr2  | 27106888 | 27110709 - | 2  | 3241 | 5.71 |
| LOC_Os05g44210.1 | trehalose-6-phosphate synthase, putative, expressed                                             | Chr5  | 25713720 | 25720299 + | 16 | 3271 | 5.71 |
| LOC_Os02g01520.1 | IQ calmodulin-binding motif family protein, putative, expressed                                 | Chr2  | 299744   | 302823 +   | 3  | 2013 | 5.71 |
| LOC_Os10g40060.2 | protein kinase, putative, expressed                                                             | Chr10 | 21454034 | 21459741 - | 7  | 2555 | 5.71 |
| LOC_Os09g27610.1 | expressed protein                                                                               | Chr9  | 16781152 | 16784471 + | 12 | 1548 | 5.71 |
| LOC_Os02g35720.1 | signal peptidase complex subunit 2, putative, expressed                                         | Chr2  | 21462176 | 21464520 - | 4  | 1081 | 5.71 |
| LOC_Os06g43800.1 | methyltransferase domain containing protein, putative, expressed                                | Chr6  | 26375956 | 26379227 - | 7  | 1895 | 5.71 |
| LOC_Os06g43800.2 | methyltransferase domain containing protein, putative, expressed                                | Chr6  | 26375956 | 26379227 - | 6  | 2028 | 5.71 |
| LOC_Os08g44620.1 | zinc-binding protein, putative, expressed                                                       | Chr8  | 28059345 | 28061198 - | 3  | 1634 | 5.72 |
| LOC_Os01g62870.2 | oxidoreductase, aldo/keto reductase family protein, putative, expressed                         | Chr1  | 36412130 | 36414610 + | 4  | 1163 | 5.72 |
| LOC_Os06g43610.1 | formamidopyrimidine-DNA glycosylase, putative, expressed                                        | Chr6  | 26229857 | 26232885 - | 10 | 2027 | 5.72 |
| LOC_Os06g46380.1 | rab geranylgeranyl transferase like protein, putative, expressed                                | Chr6  | 28143872 | 28148384 + | 8  | 2759 | 5.72 |
| LOC_Os01g45070.2 | peptide deformylase, putative, expressed                                                        | Chr1  | 25586543 | 25589162 - | 5  | 1047 | 5.72 |
| LOC_Os09g35910.1 | homeobox associated leucine zipper, putative, expressed                                         | Chr9  | 20671754 | 20673282 + | 2  | 1499 | 5.72 |
| LOC_Os09g35920.2 | mediator of RNA polymerase II transcription subunit 10, putative, expressed                     | Chr9  | 20673834 | 20678640 - | 7  | 2614 | 5.72 |
| LOC_Os05g28840.1 | expressed protein                                                                               | Chr5  | 16908946 | 16910083 - | 1  | 1170 | 5.72 |
| LOC_Os02g06360.1 | uncharacterized protein CPn_0526/CP_0226/CPj0526/CpB0547, putative, expressed                   | Chr2  | 3179477  | 3182791 +  | 3  | 1577 | 5.72 |
| LOC_Os02g47350.1 | oxidoreductase, short chain dehydrogenase/reductase family, putative, expressed                 | Chr2  | 28914744 | 28916890 + | 3  | 1614 | 5.72 |
| LOC_Os02g33560.1 | expressed protein                                                                               | Chr2  | 19962597 | 19967923 - | 5  | 1809 | 5.72 |
| LOC_Os08g34340.1 | DUF593 domain containing protein, expressed                                                     | Chr8  | 21551910 | 21558589 + | 11 | 3994 | 5.72 |
| LOC_Os04g02910.3 | membrane related protein CP5, putative, expressed                                               | Chr4  | 1148798  | 1151427 -  | 5  | 1670 | 5.72 |
| LOC_Os04g29424.1 | retrotransposon protein, putative, LINE subclass, expressed                                     | Chr4  | 17491799 | 17496211 - | 8  | 1792 | 5.72 |
| LOC_Os01g34970.2 | MDR-like ABC transporter, putative, expressed                                                   | Chr1  | 19352055 | 19359549 + | 10 | 3801 | 5.72 |
| LOC_Os04g59580.1 | zinc finger, C3HC4 type domain containing protein, expressed                                    | Chr4  | 35430341 | 35432837 - | 3  | 1726 | 5.72 |
| LOC_Os07g09460.1 | expressed protein                                                                               | Chr7  | 4988153  | 4998441 +  | 4  | 896  | 5.72 |
| LOC_Os10g17990.1 | phosphatidate cytidyltransferase, putative, expressed                                           | Chr10 | 9120533  | 9126526 -  | 12 | 2257 | 5.72 |

|                  |                                                                      |       |          |          |   |    |      |      |
|------------------|----------------------------------------------------------------------|-------|----------|----------|---|----|------|------|
| LOC_Os10g40060.3 | protein kinase, putative, expressed                                  | Chr10 | 21454034 | 21458842 | - | 7  | 2724 | 5.72 |
| LOC_Os04g59400.1 | expressed protein                                                    | Chr4  | 35317094 | 35324442 | + | 3  | 4008 | 5.73 |
| LOC_Os04g57780.1 | tetratricopeptide repeat domain containing protein, expressed        | Chr4  | 34410425 | 34413187 | - | 5  | 1222 | 5.73 |
| LOC_Os12g42070.1 | OsWAK129b - OsWAK receptor-like protein kinase, expressed            | Chr12 | 26093652 | 26097726 | + | 6  | 3017 | 5.73 |
| LOC_Os01g32880.1 | AP-3 complex subunit delta, putative, expressed                      | Chr1  | 18051517 | 18054939 | + | 1  | 3455 | 5.73 |
| LOC_Os03g29740.1 | LSM domain containing protein, expressed                             | Chr3  | 16941146 | 16943327 | + | 4  | 613  | 5.73 |
| LOC_Os04g56800.1 | peptidyl-prolyl cis-trans isomerase, putative, expressed             | Chr4  | 33873455 | 33876112 | - | 3  | 801  | 5.73 |
| LOC_Os03g46640.1 | deoxyuridine 5-triphosphate nucleotidohydrolase, putative, expressed | Chr3  | 26396243 | 26397459 | - | 3  | 1129 | 5.73 |
| LOC_Os03g22400.1 | ulp1 protease family protein, putative, expressed                    | Chr3  | 12823585 | 12828278 | - | 9  | 2304 | 5.73 |
| LOC_Os03g49750.1 | protein kinase family protein, putative, expressed                   | Chr3  | 28314271 | 28319959 | + | 6  | 3181 | 5.73 |
| LOC_Os01g48280.2 | ubiquitin-conjugating enzyme, putative, expressed                    | Chr1  | 27668390 | 27669768 | - | 4  | 1079 | 5.73 |
| LOC_Os07g10530.1 | carboxyl-terminal peptidase, putative, expressed                     | Chr7  | 5682011  | 5685298  | + | 7  | 2069 | 5.73 |
| LOC_Os03g10110.1 | cupin domain containing protein, expressed                           | Chr3  | 5116235  | 5119702  | + | 5  | 3143 | 5.73 |
| LOC_Os01g70390.1 | expressed protein                                                    | Chr1  | 40780344 | 40784885 | + | 16 | 2774 | 5.73 |
| LOC_Os08g32570.1 | expressed protein                                                    | Chr8  | 20171194 | 20174672 | + | 3  | 2802 | 5.73 |
| LOC_Os06g43250.1 | expressed protein                                                    | Chr6  | 25990413 | 25993227 | + | 10 | 1566 | 5.73 |
| LOC_Os07g01114.1 | expressed protein                                                    | Chr7  | 66665    | 67808    | - | 2  | 1121 | 5.73 |
| LOC_Os02g47744.4 | MYB family transcription factor, putative, expressed                 | Chr2  | 29190345 | 29195573 | + | 3  | 869  | 5.73 |
| LOC_Os06g30710.3 | DGCR14, putative, expressed                                          | Chr6  | 17812058 | 17816172 | + | 2  | 2189 | 5.74 |
| LOC_Os11g37070.2 | expressed protein                                                    | Chr11 | 21883168 | 21888749 | - | 2  | 1681 | 5.74 |
| LOC_Os04g36630.1 | expressed protein                                                    | Chr4  | 22095006 | 22097462 | - | 2  | 1644 | 5.74 |
| LOC_Os03g05806.1 | pseudouridine synthase family protein, putative, expressed           | Chr3  | 2901596  | 2906614  | + | 8  | 3502 | 5.74 |
| LOC_Os03g22400.2 | ulp1 protease family protein, putative, expressed                    | Chr3  | 12823585 | 12828278 | - | 8  | 2531 | 5.74 |
| LOC_Os02g42300.1 | expressed protein                                                    | Chr2  | 25435053 | 25439436 | + | 4  | 3131 | 5.74 |
| LOC_Os09g28610.1 | protein transport protein, putative, expressed                       | Chr9  | 17405811 | 17413209 | + | 14 | 3088 | 5.74 |
| LOC_Os02g42314.2 | ubiquitin-conjugating enzyme, putative, expressed                    | Chr2  | 25450214 | 25454110 | - | 6  | 1182 | 5.74 |
| LOC_Os05g51190.5 | protein kinase family protein, putative, expressed                   | Chr5  | 29359911 | 29364121 | - | 8  | 3518 | 5.74 |
| LOC_Os05g51190.4 | protein kinase family protein, putative, expressed                   | Chr5  | 29359911 | 29364695 | - | 8  | 3598 | 5.74 |
| LOC_Os05g51190.3 | protein kinase family protein, putative, expressed                   | Chr5  | 29359911 | 29364139 | - | 6  | 3864 | 5.74 |
| LOC_Os03g60610.2 | SEC14 cytosolic factor family protein, putative, expressed           | Chr3  | 34439354 | 34444433 | - | 7  | 2678 | 5.74 |
| LOC_Os03g60610.1 | SEC14 cytosolic factor family protein, putative, expressed           | Chr3  | 34439354 | 34444441 | - | 7  | 2641 | 5.74 |
| LOC_Os03g60610.3 | SEC14 cytosolic factor family protein, putative, expressed           | Chr3  | 34439354 | 34444433 | - | 7  | 2637 | 5.74 |
| LOC_Os12g31640.2 | vacuolar protein sorting-associated protein 26, putative, expressed  | Chr12 | 19055878 | 19060976 | + | 10 | 1679 | 5.74 |
| LOC_Os02g42850.2 | MYB family transcription factor, putative, expressed                 | Chr2  | 25759839 | 25763028 | + | 3  | 1554 | 5.74 |
| LOC_Os02g42850.1 | MYB family transcription factor, putative, expressed                 | Chr2  | 25759840 | 25763028 | + | 2  | 1864 | 5.74 |
| LOC_Os06g17390.1 | auxin-independent growth promoter protein, putative, expressed       | Chr6  | 10082202 | 10087094 | - | 8  | 3328 | 5.74 |
| LOC_Os07g40940.1 | X8 domain containing protein, expressed                              | Chr7  | 24505166 | 24508963 | + | 4  | 1691 | 5.74 |
| LOC_Os04g35300.1 | SLL1 protein, putative, expressed                                    | Chr4  | 21466485 | 21468612 | - | 2  | 781  | 5.74 |
| LOC_Os01g70330.1 | prefoldin subunit family protein, expressed                          | Chr1  | 40739077 | 40743760 | + | 11 | 2184 | 5.74 |
| LOC_Os01g70330.2 | prefoldin subunit family protein, expressed                          | Chr1  | 40739117 | 40743760 | + | 11 | 2134 | 5.74 |
| LOC_Os06g08910.1 | glutamate receptor 2.8 precursor, putative, expressed                | Chr6  | 4490176  | 4493909  | - | 5  | 2150 | 5.75 |
| LOC_Os09g20430.1 | SCO1 protein homolog, mitochondrial precursor, putative, expressed   | Chr9  | 12289592 | 12294955 | - | 8  | 1843 | 5.75 |
| LOC_Os12g21930.2 | PPR repeat containing protein, expressed                             | Chr12 | 12349459 | 12352302 | + | 2  | 1946 | 5.75 |
| LOC_Os12g06070.1 | expressed protein                                                    | Chr12 | 2830044  | 2831936  | + | 1  | 1925 | 5.75 |
| LOC_Os03g53300.2 | expressed protein                                                    | Chr3  | 30593564 | 30596059 | + | 7  | 1398 | 5.75 |

|                  |                                                                                     |       |          |            |    |      |      |
|------------------|-------------------------------------------------------------------------------------|-------|----------|------------|----|------|------|
| LOC_Os01g01070.3 | expressed protein                                                                   | Chr1  | 29818    | 33943 +    | 13 | 1785 | 5.75 |
| LOC_Os08g03430.1 | extracellular ligand-gated ion channel, putative, expressed                         | Chr8  | 1606299  | 1609518 +  | 4  | 2065 | 5.75 |
| LOC_Os05g45830.1 | expressed protein                                                                   | Chr5  | 26544658 | 26552137 - | 11 | 3410 | 5.75 |
| LOC_Os07g10690.6 | NLI interacting factor-like phosphatase, putative, expressed                        | Chr7  | 5805379  | 5810527 +  | 7  | 2055 | 5.75 |
| LOC_Os07g10690.7 | NLI interacting factor-like phosphatase, putative, expressed                        | Chr7  | 5805373  | 5810527 +  | 7  | 2037 | 5.75 |
| LOC_Os09g33580.2 | BEE 1, putative, expressed                                                          | Chr9  | 19812623 | 19815196 - | 8  | 1715 | 5.75 |
| LOC_Os09g33580.1 | BEE 1, putative, expressed                                                          | Chr9  | 19812678 | 19815196 - | 8  | 1657 | 5.75 |
| LOC_Os02g09340.1 | expressed protein                                                                   | Chr2  | 4802880  | 4806459 -  | 2  | 3079 | 5.75 |
| LOC_Os06g33320.1 | extra-large G-protein-related, putative, expressed                                  | Chr6  | 19401016 | 19406760 + | 5  | 3288 | 5.75 |
| LOC_Os02g37910.1 | expressed protein                                                                   | Chr2  | 22910959 | 22915808 - | 9  | 2250 | 5.75 |
| LOC_Os07g19540.1 | expressed protein                                                                   | Chr7  | 11582843 | 11584816 + | 5  | 911  | 5.75 |
| LOC_Os01g42510.1 | expressed protein                                                                   | Chr1  | 24168245 | 24171441 - | 5  | 921  | 5.75 |
| LOC_Os06g08910.3 | glutamate receptor 2.8 precursor, putative, expressed                               | Chr6  | 4490176  | 4493930 -  | 5  | 2206 | 5.75 |
| LOC_Os05g33644.1 | inosine-uridine preferring nucleoside hydrolase family protein, putative, expressed | Chr5  | 19794800 | 19805637 - | 13 | 3116 | 5.75 |
| LOC_Os02g39410.1 | protein phosphatase 2C, putative, expressed                                         | Chr2  | 23776248 | 23782298 - | 10 | 2575 | 5.75 |
| LOC_Os04g12480.1 | pumilio-family RNA binding repeat containing protein, expressed                     | Chr4  | 6902844  | 6909634 -  | 10 | 2769 | 5.75 |
| LOC_Os12g21930.1 | PPR repeat containing protein, expressed                                            | Chr12 | 12349459 | 12352410 + | 3  | 2012 | 5.75 |
| LOC_Os04g41910.2 | RNA recognition motif containing protein, putative, expressed                       | Chr4  | 24834401 | 24839155 + | 12 | 1990 | 5.75 |
| LOC_Os10g21890.2 | glycosyl transferase family 8, putative, expressed                                  | Chr10 | 11250924 | 11255589 + | 9  | 2950 | 5.76 |
| LOC_Os08g20680.1 | expressed protein                                                                   | Chr8  | 12430023 | 12431050 - | 1  | 1060 | 5.76 |
| LOC_Os03g60880.2 | nucleobase-ascorbate transporter, putative, expressed                               | Chr3  | 34597393 | 34601212 - | 15 | 2497 | 5.76 |
| LOC_Os03g53300.1 | expressed protein                                                                   | Chr3  | 30593465 | 30596059 + | 7  | 1416 | 5.76 |
| LOC_Os08g15060.1 | ATP binding protein, putative, expressed                                            | Chr8  | 9101238  | 9105746 -  | 11 | 2894 | 5.76 |
| LOC_Os07g20150.1 | expressed protein                                                                   | Chr7  | 11632040 | 11636658 - | 14 | 2015 | 5.76 |
| LOC_Os06g03970.1 | receptor-like protein kinase 5 precursor, putative, expressed                       | Chr6  | 1605460  | 1612409 +  | 26 | 4628 | 5.76 |
| LOC_Os08g40580.2 | methyltransferase domain containing protein, expressed                              | Chr8  | 25687727 | 25690627 - | 9  | 1258 | 5.76 |
| LOC_Os03g60810.1 | lectin-like receptor kinase, putative, expressed                                    | Chr3  | 34544837 | 34548110 - | 1  | 3306 | 5.76 |
| LOC_Os10g42170.1 | GTPase of unknown function domain containing protein, putative, expressed           | Chr10 | 22680086 | 22682202 + | 8  | 1371 | 5.76 |
| LOC_Os01g70460.2 | expressed protein                                                                   | Chr1  | 40807102 | 40808500 + | 4  | 896  | 5.76 |
| LOC_Os07g48850.2 | PPR repeat containing protein, expressed                                            | Chr7  | 29227754 | 29232760 - | 4  | 3634 | 5.76 |
| LOC_Os02g21630.1 | SEC14 cytosolic factor family protein, putative, expressed                          | Chr2  | 12846471 | 12851443 + | 7  | 1813 | 5.76 |
| LOC_Os11g25920.1 | transcription factor-related, putative, expressed                                   | Chr11 | 14785152 | 14789879 + | 9  | 1731 | 5.76 |
| LOC_Os03g59580.1 | hydrolase, NUDIX family, domain containing protein, expressed                       | Chr3  | 33916812 | 33921098 - | 4  | 1198 | 5.76 |
| LOC_Os03g10340.1 | 40S ribosomal protein S3a, putative, expressed                                      | Chr3  | 5274923  | 5278012 +  | 6  | 2106 | 5.76 |
| LOC_Os01g70950.1 | spermatogenesis-associated protein 20 precursor, putative, expressed                | Chr1  | 41066583 | 41070764 - | 7  | 2861 | 5.76 |
| LOC_Os01g70950.2 | spermatogenesis-associated protein 20 precursor, putative, expressed                | Chr1  | 41066583 | 41070764 - | 7  | 2883 | 5.76 |
| LOC_Os11g01530.2 | ferritin-1, chloroplast precursor, putative, expressed                              | Chr11 | 305062   | 307728 -   | 7  | 1547 | 5.76 |
| LOC_Os04g30910.1 | SAM domain family protein, expressed                                                | Chr4  | 18468228 | 18473269 + | 5  | 1353 | 5.77 |
| LOC_Os08g03420.2 | kelch repeat protein, putative, expressed                                           | Chr8  | 1600716  | 1604906 +  | 8  | 2244 | 5.77 |
| LOC_Os08g03420.1 | kelch repeat protein, putative, expressed                                           | Chr8  | 1600716  | 1604906 +  | 8  | 2253 | 5.77 |
| LOC_Os08g03420.4 | kelch repeat protein, putative, expressed                                           | Chr8  | 1600716  | 1604906 +  | 7  | 2284 | 5.77 |
| LOC_Os09g35890.1 | kinesin motor domain containing protein, expressed                                  | Chr9  | 20654707 | 20659187 + | 14 | 3447 | 5.77 |
| LOC_Os07g29780.2 | ATROPGEF7/ROPGEF7, putative, expressed                                              | Chr7  | 17505866 | 17508816 - | 8  | 2396 | 5.77 |
| LOC_Os03g10500.1 | adenylyl-sulfate kinase, putative, expressed                                        | Chr3  | 5341101  | 5347082 -  | 7  | 1599 | 5.77 |
| LOC_Os03g49485.1 | expressed protein                                                                   | Chr3  | 28163600 | 28164465 - | 1  | 898  | 5.77 |

|                  |                                                                            |       |          |          |   |    |      |      |
|------------------|----------------------------------------------------------------------------|-------|----------|----------|---|----|------|------|
| LOC_Os02g43010.1 | vacuolar-processing enzyme precursor, putative, expressed                  | Chr2  | 25890441 | 25895244 | - | 9  | 2218 | 5.77 |
| LOC_Os01g42720.1 | expressed protein                                                          | Chr1  | 24300144 | 24301233 | + | 4  | 903  | 5.77 |
| LOC_Os01g68790.2 | RNA recognition motif containing protein, putative, expressed              | Chr1  | 39954529 | 39956523 | + | 5  | 1316 | 5.77 |
| LOC_Os05g43970.1 | heat- and acid-stable phosphoprotein, putative, expressed                  | Chr5  | 25582055 | 25586620 | + | 7  | 1610 | 5.77 |
| LOC_Os12g40920.1 | bZIP transcription factor domain containing protein, expressed             | Chr12 | 25330650 | 25336551 | + | 6  | 1604 | 5.77 |
| LOC_Os10g21890.1 | glycosyl transferase family 8, putative, expressed                         | Chr10 | 11250877 | 11255589 | + | 10 | 3100 | 5.77 |
| LOC_Os01g54424.1 | expressed protein                                                          | Chr1  | 31313396 | 31317560 | - | 4  | 1649 | 5.77 |
| LOC_Os09g30100.1 | NOL1/NOP2/sun family protein, putative, expressed                          | Chr9  | 18293017 | 18300993 | + | 21 | 2536 | 5.77 |
| LOC_Os12g21930.3 | PPR repeat containing protein, expressed                                   | Chr12 | 12349459 | 12353649 | + | 3  | 2219 | 5.77 |
| LOC_Os02g49320.1 | sucrase-related, putative, expressed                                       | Chr2  | 30139655 | 30143452 | - | 5  | 1870 | 5.77 |
| LOC_Os01g68790.3 | RNA recognition motif containing protein, putative, expressed              | Chr1  | 39954529 | 39956684 | + | 5  | 1293 | 5.77 |
| LOC_Os02g16450.1 | expressed protein                                                          | Chr2  | 9390823  | 9393829  | - | 2  | 2082 | 5.77 |
| LOC_Os02g42374.3 | e2f-associated phosphoprotein, putative, expressed                         | Chr2  | 25493119 | 25494117 | + | 1  | 1031 | 5.77 |
| LOC_Os01g51754.1 | alpha-amylase precursor, putative, expressed                               | Chr1  | 29760719 | 29770037 | + | 11 | 4760 | 5.77 |
| LOC_Os03g61330.1 | fumarylacetoacetase, putative, expressed                                   | Chr3  | 34817125 | 34820371 | - | 8  | 1365 | 5.78 |
| LOC_Os09g36130.1 | expressed protein                                                          | Chr9  | 20799135 | 20802933 | - | 12 | 1906 | 5.78 |
| LOC_Os04g44590.1 | expressed protein                                                          | Chr4  | 26387544 | 26391274 | + | 4  | 1063 | 5.78 |
| LOC_Os07g38610.1 | UAA transporter family domain containing protein, expressed                | Chr7  | 23187292 | 23192344 | - | 15 | 2308 | 5.78 |
| LOC_Os07g06440.1 | deoxyribonuclease tatD, putative, expressed                                | Chr7  | 3118815  | 3122518  | + | 12 | 1623 | 5.78 |
| LOC_Os09g35890.2 | kinesin motor domain containing protein, expressed                         | Chr9  | 20654707 | 20659187 | + | 13 | 3545 | 5.78 |
| LOC_Os01g02770.1 | resistance-related receptor-like kinase, putative, expressed               | Chr1  | 961681   | 965151   | + | 3  | 2088 | 5.78 |
| LOC_Os09g11240.1 | expressed protein                                                          | Chr9  | 6243180  | 6245977  | + | 2  | 1016 | 5.78 |
| LOC_Os02g43010.2 | vacuolar-processing enzyme precursor, putative, expressed                  | Chr2  | 25890445 | 25895244 | - | 8  | 2327 | 5.78 |
| LOC_Os08g27030.2 | lipid phosphatase protein, putative, expressed                             | Chr8  | 16513732 | 16517661 | - | 8  | 1624 | 5.78 |
| LOC_Os08g27030.1 | lipid phosphatase protein, putative, expressed                             | Chr8  | 16513726 | 16517896 | - | 9  | 1728 | 5.78 |
| LOC_Os01g26920.2 | expressed protein                                                          | Chr1  | 14993201 | 14998107 | - | 9  | 1643 | 5.78 |
| LOC_Os07g13980.1 | glucose-1-phosphate adenylyltransferase large subunit, putative, expressed | Chr7  | 7982501  | 7989283  | - | 16 | 3265 | 5.78 |
| LOC_Os03g34040.2 | ribosomal protein, putative, expressed                                     | Chr3  | 19412908 | 19417098 | - | 3  | 1392 | 5.78 |
| LOC_Os06g28740.1 | expressed protein                                                          | Chr6  | 16363079 | 16366463 | - | 7  | 1463 | 5.78 |
| LOC_Os09g02284.1 | DNA-directed RNA polymerase subunit, putative, expressed                   | Chr9  | 927068   | 934087   | + | 3  | 1841 | 5.78 |
| LOC_Os03g21020.1 | RNA recognition motif containing protein, putative, expressed              | Chr3  | 11924468 | 11929717 | - | 12 | 2183 | 5.78 |
| LOC_Os12g40920.4 | bZIP transcription factor domain containing protein, expressed             | Chr12 | 25332774 | 25336474 | + | 6  | 2067 | 5.78 |
| LOC_Os12g40920.3 | bZIP transcription factor domain containing protein, expressed             | Chr12 | 25332774 | 25336474 | + | 5  | 2344 | 5.78 |
| LOC_Os04g33050.1 | HIRAN domain containing protein, putative, expressed                       | Chr4  | 20009913 | 20015529 | + | 12 | 3672 | 5.78 |
| LOC_Os11g01530.1 | ferritin-1, chloroplast precursor, putative, expressed                     | Chr11 | 304967   | 307931   | - | 8  | 1752 | 5.78 |
| LOC_Os04g59320.1 | protein kinase domain containing protein, expressed                        | Chr4  | 35270952 | 35276805 | + | 9  | 3044 | 5.78 |
| LOC_Os06g07960.1 | cystathionine gamma-synthase, putative, expressed                          | Chr6  | 3823413  | 3827346  | + | 11 | 1738 | 5.78 |
| LOC_Os09g14680.1 | expressed protein                                                          | Chr9  | 8710149  | 8716892  | - | 8  | 1994 | 5.78 |
| LOC_Os01g07420.1 | hydrolase, alpha/beta fold family protein, putative, expressed             | Chr1  | 3516658  | 3519175  | - | 4  | 1647 | 5.78 |
| LOC_Os11g35060.1 | agenet domain containing protein, expressed                                | Chr11 | 20540287 | 20544620 | + | 6  | 2580 | 5.79 |
| LOC_Os03g59240.1 | carboxyl-terminal peptidase, putative, expressed                           | Chr3  | 33731404 | 33735208 | + | 7  | 2277 | 5.79 |
| LOC_Os06g07860.1 | cystathionine gamma-synthase, putative, expressed                          | Chr6  | 3823021  | 3827411  | + | 12 | 2138 | 5.79 |
| LOC_Os09g26580.1 | expressed protein                                                          | Chr9  | 16097465 | 16102821 | + | 10 | 2699 | 5.79 |
| LOC_Os09g38980.1 | T-complex protein, putative, expressed                                     | Chr9  | 22382924 | 22387028 | + | 8  | 2643 | 5.79 |
| LOC_Os09g38980.2 | T-complex protein, putative, expressed                                     | Chr9  | 22382924 | 22387041 | + | 7  | 2832 | 5.79 |



|                  |                                                                                              |       |          |            |    |      |      |
|------------------|----------------------------------------------------------------------------------------------|-------|----------|------------|----|------|------|
| LOC_Os02g57140.1 | expressed protein                                                                            | Chr2  | 34991200 | 34996641 + | 6  | 3784 | 5.79 |
| LOC_Os02g57140.3 | expressed protein                                                                            | Chr2  | 34991250 | 34996641 + | 5  | 3836 | 5.79 |
| LOC_Os10g33790.1 | expressed protein                                                                            | Chr10 | 17905866 | 17910800 - | 10 | 1783 | 5.79 |
| LOC_Os01g43230.1 | expressed protein                                                                            | Chr1  | 24695808 | 24697913 - | 2  | 1616 | 5.79 |
| LOC_Os06g35470.1 | L1P family of ribosomal proteins domain containing protein, expressed                        | Chr6  | 20666494 | 20673768 + | 10 | 2067 | 5.79 |
| LOC_Os01g66890.2 | BTBZ1 - Bric-a-Brac, Tramtrack, and Broad Complex BTB domain with TAZ zinc finger and Calmod | Chr1  | 38843729 | 38846536 + | 5  | 2261 | 5.79 |
| LOC_Os09g36890.1 | hydroxyproline-rich glycoprotein family protein, putative, expressed                         | Chr9  | 21274719 | 21276307 - | 1  | 1621 | 5.79 |
| LOC_Os11g32160.1 | expressed protein                                                                            | Chr11 | 18981895 | 18987922 + | 9  | 1366 | 5.79 |
| LOC_Os05g37970.4 | universal stress protein domain containing protein, putative, expressed                      | Chr5  | 22276282 | 22279209 + | 4  | 1345 | 5.79 |
| LOC_Os05g37970.2 | universal stress protein domain containing protein, putative, expressed                      | Chr5  | 22276282 | 22279209 + | 4  | 1465 | 5.79 |
| LOC_Os05g37970.3 | universal stress protein domain containing protein, putative, expressed                      | Chr5  | 22276046 | 22279209 + | 4  | 1683 | 5.79 |
| LOC_Os01g59490.1 | FAD dependent oxidoreductase domain containing protein, expressed                            | Chr1  | 34406376 | 34409218 + | 5  | 1763 | 5.79 |
| LOC_Os02g32460.1 | ThiF family domain containing protein, putative, expressed                                   | Chr2  | 19192500 | 19197127 + | 11 | 2095 | 5.79 |
| LOC_Os05g44810.2 | OslAA18 - Auxin-responsive Aux/IAA gene family member, expressed                             | Chr5  | 26052916 | 26056268 - | 7  | 1577 | 5.80 |
| LOC_Os05g44810.3 | OslAA18 - Auxin-responsive Aux/IAA gene family member, expressed                             | Chr5  | 26052916 | 26056268 - | 7  | 1557 | 5.80 |
| LOC_Os05g06490.1 | RNA polymerase Rpb7, N-terminal domain containing protein, expressed                         | Chr5  | 3342054  | 3344599 +  | 2  | 1034 | 5.80 |
| LOC_Os02g27000.1 | ATP-binding region, ATPase-like domain containing protein, expressed                         | Chr2  | 15865332 | 15876489 + | 20 | 3707 | 5.80 |
| LOC_Os03g19270.3 | universal stress protein domain containing protein, putative, expressed                      | Chr3  | 10839450 | 10840785 - | 4  | 1137 | 5.80 |
| LOC_Os03g19270.2 | universal stress protein domain containing protein, putative, expressed                      | Chr3  | 10839450 | 10840785 - | 4  | 1146 | 5.80 |
| LOC_Os03g27003.2 | expressed protein                                                                            | Chr3  | 15453264 | 15456412 + | 2  | 1406 | 5.80 |
| LOC_Os03g60880.1 | nucleobase-ascorbate transporter, putative, expressed                                        | Chr3  | 34597354 | 34601212 - | 14 | 2577 | 5.80 |
| LOC_Os03g60880.5 | nucleobase-ascorbate transporter, putative, expressed                                        | Chr3  | 34597354 | 34601212 - | 13 | 2636 | 5.80 |
| LOC_Os03g60880.3 | nucleobase-ascorbate transporter, putative, expressed                                        | Chr3  | 34597354 | 34601212 - | 13 | 2643 | 5.80 |
| LOC_Os03g46480.2 | ranBP1 domain containing protein, expressed                                                  | Chr3  | 26293200 | 26298495 - | 10 | 2111 | 5.80 |
| LOC_Os02g20160.1 | PPR repeat domain containing protein, putative, expressed                                    | Chr2  | 11876336 | 11879831 + | 3  | 3216 | 5.80 |
| LOC_Os07g08030.1 | ribose-5-phosphate isomerase A, putative, expressed                                          | Chr7  | 4068002  | 4070237 -  | 2  | 1246 | 5.80 |
| LOC_Os08g13469.1 | expressed protein                                                                            | Chr8  | 8018574  | 8021718 +  | 3  | 2367 | 5.80 |
| LOC_Os06g30710.1 | DGCR14, putative, expressed                                                                  | Chr6  | 17812085 | 17816172 + | 3  | 2260 | 5.80 |
| LOC_Os08g12780.3 | chloroplast envelope membrane protein, putative, expressed                                   | Chr8  | 7568534  | 7574295 -  | 9  | 2776 | 5.80 |
| LOC_Os08g12780.2 | chloroplast envelope membrane protein, putative, expressed                                   | Chr8  | 7568534  | 7574295 -  | 9  | 2781 | 5.80 |
| LOC_Os01g26920.1 | expressed protein                                                                            | Chr1  | 14993201 | 14998107 - | 9  | 1692 | 5.80 |
| LOC_Os04g17660.1 | rhodanese-like domain containing protein, putative, expressed                                | Chr4  | 9671244  | 9674147 -  | 6  | 1151 | 5.80 |
| LOC_Os04g17660.2 | rhodanese-like domain containing protein, putative, expressed                                | Chr4  | 9671230  | 9674123 -  | 5  | 1217 | 5.80 |
| LOC_Os10g33790.2 | expressed protein                                                                            | Chr10 | 17905866 | 17910800 - | 10 | 1819 | 5.80 |
| LOC_Os05g43970.2 | heat- and acid-stable phosphoprotein, putative, expressed                                    | Chr5  | 25582055 | 25586608 + | 7  | 1513 | 5.80 |
| LOC_Os07g09610.1 | CAMK_KIN1/SNF1/Nim1_like_AMPKh.1 - CAMK includes calcium/calmodulin depeudent protein k      | Chr7  | 5102509  | 5107298 +  | 9  | 2156 | 5.80 |
| LOC_Os07g30800.1 | immunophilin, putative, expressed                                                            | Chr7  | 18228560 | 18232364 + | 7  | 1457 | 5.80 |
| LOC_Os12g19180.1 | ATP binding protein, putative, expressed                                                     | Chr12 | 11137921 | 11141605 + | 7  | 2502 | 5.80 |
| LOC_Os08g04280.1 | actin, putative, expressed                                                                   | Chr8  | 2084554  | 2093718 +  | 20 | 2713 | 5.80 |
| LOC_Os08g04280.2 | actin, putative, expressed                                                                   | Chr8  | 2084554  | 2093718 +  | 20 | 2697 | 5.80 |
| LOC_Os11g02450.1 | elongation factor P, putative, expressed                                                     | Chr11 | 734246   | 737188 +   | 7  | 1177 | 5.80 |
| LOC_Os02g55880.1 | EF hand family protein, putative, expressed                                                  | Chr2  | 34206868 | 34209854 - | 6  | 1359 | 5.80 |
| LOC_Os03g24600.1 | peptide methionine sulfoxide reductase msrB, putative, expressed                             | Chr3  | 14010165 | 14013832 + | 3  | 875  | 5.80 |
| LOC_Os09g32090.2 | methyl-binding domain protein MBD, putative, expressed                                       | Chr9  | 19152100 | 19155881 - | 4  | 1449 | 5.81 |
| LOC_Os11g37260.1 | SEY1, putative, expressed                                                                    | Chr11 | 22003368 | 22010520 + | 22 | 3601 | 5.81 |

|                  |                                                                             |       |          |            |    |      |      |
|------------------|-----------------------------------------------------------------------------|-------|----------|------------|----|------|------|
| LOC_Os03g63074.3 | Ser/Thr protein phosphatase family protein, expressed                       | Chr3  | 35659840 | 35663960 - | 2  | 4091 | 5.81 |
| LOC_Os03g45970.1 | expressed protein                                                           | Chr3  | 25978468 | 25990239 - | 10 | 2833 | 5.81 |
| LOC_Os05g03070.1 | transporter, putative, expressed                                            | Chr5  | 1198628  | 1201047 -  | 4  | 2202 | 5.81 |
| LOC_Os02g38200.1 | dehydrogenase, putative, expressed                                          | Chr2  | 23106931 | 23110390 - | 4  | 1762 | 5.81 |
| LOC_Os07g43950.1 | RNA recognition motif containing protein, putative, expressed               | Chr7  | 26265494 | 26268673 + | 6  | 1283 | 5.81 |
| LOC_Os03g46480.1 | ranBP1 domain containing protein, expressed                                 | Chr3  | 26293200 | 26298532 - | 10 | 2195 | 5.81 |
| LOC_Os01g07900.1 | expressed protein                                                           | Chr1  | 3819067  | 3819782 -  | 1  | 748  | 5.81 |
| LOC_Os02g56900.1 | thioredoxin family protein, putative, expressed                             | Chr2  | 34879480 | 34881094 - | 3  | 1518 | 5.81 |
| LOC_Os01g60290.1 | expressed protein                                                           | Chr1  | 34885348 | 34888692 - | 2  | 540  | 5.81 |
| LOC_Os01g50030.1 | CPuORF25 - conserved peptide uORF-containing transcript, expressed          | Chr1  | 28739987 | 28744762 + | 12 | 2421 | 5.81 |
| LOC_Os07g25500.1 | pentatricopeptide, putative, expressed                                      | Chr7  | 14606244 | 14609276 + | 2  | 1854 | 5.81 |
| LOC_Os03g58080.1 | BT1 family protein, putative, expressed                                     | Chr3  | 33065377 | 33070874 - | 9  | 2553 | 5.81 |
| LOC_Os01g07570.1 | carboxyl-terminal proteinase, putative, expressed                           | Chr1  | 3633275  | 3639164 -  | 7  | 2187 | 5.82 |
| LOC_Os02g34990.1 | ACT domain containing protein, putative, expressed                          | Chr2  | 20989673 | 20994251 + | 9  | 2724 | 5.82 |
| LOC_Os01g02170.2 | expressed protein                                                           | Chr1  | 634011   | 639309 -   | 2  | 3745 | 5.82 |
| LOC_Os01g74152.1 | haloacid dehalogenase-like hydrolase family protein, putative, expressed    | Chr1  | 42954163 | 42956646 + | 9  | 1608 | 5.82 |
| LOC_Os04g53200.2 | exonuclease, putative, expressed                                            | Chr4  | 31680924 | 31683944 - | 4  | 1556 | 5.82 |
| LOC_Os06g48534.1 | GATA transcription factor 25, putative, expressed                           | Chr6  | 29365981 | 29370366 - | 7  | 1483 | 5.82 |
| LOC_Os07g29420.3 | DNA-directed RNA polymerase III subunit RPC8, putative, expressed           | Chr7  | 17270515 | 17274278 - | 8  | 1620 | 5.82 |
| LOC_Os07g29420.1 | DNA-directed RNA polymerase III subunit RPC8, putative, expressed           | Chr7  | 17270515 | 17274278 - | 8  | 1625 | 5.82 |
| LOC_Os07g29420.4 | DNA-directed RNA polymerase III subunit RPC8, putative, expressed           | Chr7  | 17270515 | 17274278 - | 8  | 1669 | 5.82 |
| LOC_Os01g21940.1 | WD domain, G-beta repeat domain containing protein, expressed               | Chr1  | 12303170 | 12309435 - | 15 | 2489 | 5.82 |
| LOC_Os09g29950.3 | OsPOP19 - Putative Prolyl Oligopeptidase homologue, expressed               | Chr9  | 18223857 | 18230942 - | 14 | 3500 | 5.82 |
| LOC_Os01g52250.3 | starch synthase, putative, expressed                                        | Chr1  | 30031014 | 30041476 - | 17 | 4996 | 5.82 |
| LOC_Os01g52250.2 | starch synthase, putative, expressed                                        | Chr1  | 30030997 | 30041476 - | 17 | 5385 | 5.82 |
| LOC_Os01g52250.5 | starch synthase, putative, expressed                                        | Chr1  | 30030997 | 30041476 - | 16 | 5594 | 5.82 |
| LOC_Os01g52250.4 | starch synthase, putative, expressed                                        | Chr1  | 30030997 | 30041476 - | 16 | 5596 | 5.82 |
| LOC_Os01g52250.1 | starch synthase, putative, expressed                                        | Chr1  | 30030997 | 30041476 - | 16 | 5605 | 5.82 |
| LOC_Os08g12840.1 | FabA-like domain containing protein, expressed                              | Chr8  | 7610695  | 7614807 -  | 8  | 1312 | 5.82 |
| LOC_Os11g26594.2 | expressed protein                                                           | Chr11 | 15236666 | 15239268 + | 1  | 2635 | 5.82 |
| LOC_Os07g29780.1 | ATROPGEF7/ROPGEF7, putative, expressed                                      | Chr7  | 17505856 | 17508816 - | 7  | 2443 | 5.83 |
| LOC_Os01g52250.6 | starch synthase, putative, expressed                                        | Chr1  | 30030997 | 30041476 - | 15 | 5643 | 5.83 |
| LOC_Os06g42850.1 | extracellular ligand-gated ion channel, putative, expressed                 | Chr6  | 25747063 | 25749944 - | 3  | 2057 | 5.83 |
| LOC_Os03g11510.1 | mitochondrial carrier protein, putative, expressed                          | Chr3  | 5960793  | 5964746 -  | 9  | 1963 | 5.83 |
| LOC_Os03g13010.1 | U-box domain containing protein, expressed                                  | Chr3  | 7029149  | 7031702 -  | 1  | 2586 | 5.83 |
| LOC_Os09g32274.1 | 30S ribosomal protein S16, putative, expressed                              | Chr9  | 19265965 | 19267681 + | 3  | 892  | 5.83 |
| LOC_Os09g36920.1 | la domain containing protein, putative, expressed                           | Chr9  | 21299921 | 21304309 - | 7  | 2297 | 5.83 |
| LOC_Os04g12560.1 | receptor-like protein kinase, putative, expressed                           | Chr4  | 6955305  | 6957924 -  | 1  | 2652 | 5.83 |
| LOC_Os01g56470.1 | mal d 1-associated protein, putative, expressed                             | Chr1  | 32543304 | 32545209 + | 2  | 1045 | 5.83 |
| LOC_Os01g25270.1 | pentatricopeptide repeat protein PPR986-12, putative, expressed             | Chr1  | 14264078 | 14267208 + | 1  | 3163 | 5.83 |
| LOC_Os09g21250.1 | expressed protein                                                           | Chr9  | 12825719 | 12828237 + | 5  | 1245 | 5.83 |
| LOC_Os04g57140.2 | kinesin motor domain containing protein, putative, expressed                | Chr4  | 34039969 | 34050200 - | 23 | 5582 | 5.83 |
| LOC_Os05g47545.1 | expressed protein                                                           | Chr5  | 27229582 | 27233386 - | 13 | 1892 | 5.83 |
| LOC_Os09g35920.1 | mediator of RNA polymerase II transcription subunit 10, putative, expressed | Chr9  | 20673831 | 20678640 - | 6  | 3302 | 5.83 |
| LOC_Os02g47610.1 | nmrA-like family domain containing protein, expressed                       | Chr2  | 29094969 | 29097451 - | 5  | 1392 | 5.83 |

|                  |                                                                                  |       |          |            |    |      |      |
|------------------|----------------------------------------------------------------------------------|-------|----------|------------|----|------|------|
| LOC_Os08g41680.1 | expressed protein                                                                | Chr8  | 26312540 | 26313853 - | 2  | 660  | 5.84 |
| LOC_Os08g32500.1 | nucleobase-ascorbate transporter, putative, expressed                            | Chr8  | 20129190 | 20133667 + | 14 | 3267 | 5.84 |
| LOC_Os04g08190.1 | expressed protein                                                                | Chr4  | 4353140  | 4355614 +  | 1  | 2507 | 5.84 |
| LOC_Os03g15033.1 | expressed protein                                                                | Chr3  | 8207583  | 8211913 -  | 5  | 1642 | 5.84 |
| LOC_Os04g57140.1 | kinesin motor domain containing protein, putative, expressed                     | Chr4  | 34039969 | 34050200 - | 22 | 6226 | 5.84 |
| LOC_Os07g20420.1 | tetratricopeptide-like helical, putative, expressed                              | Chr7  | 11788919 | 11792494 - | 2  | 2465 | 5.84 |
| LOC_Os03g14334.1 | expressed protein                                                                | Chr3  | 7800194  | 7801862 +  | 1  | 1701 | 5.84 |
| LOC_Os11g28350.1 | CDK-activating kinase assembly factor MAT1 family protein, expressed             | Chr11 | 16309611 | 16312118 - | 5  | 1301 | 5.84 |
| LOC_Os06g04970.1 | expressed protein                                                                | Chr6  | 2189913  | 2194838 +  | 16 | 2923 | 5.84 |
| LOC_Os02g17970.2 | AGC_PKA/PKG_like.1 - ACG kinases include homologs to PKA, PKG and PKC, expressed | Chr2  | 10419062 | 10428060 + | 15 | 4772 | 5.84 |
| LOC_Os09g39910.1 | ABC transporter, ATP-binding protein, putative, expressed                        | Chr9  | 22883038 | 22887592 - | 6  | 2752 | 5.84 |
| LOC_Os09g39910.2 | ABC transporter, ATP-binding protein, putative, expressed                        | Chr9  | 22883038 | 22887564 - | 6  | 2727 | 5.84 |
| LOC_Os07g06060.1 | expressed protein                                                                | Chr7  | 2940292  | 2942825 -  | 4  | 888  | 5.84 |
| LOC_Os01g07950.1 | OsGrx_S15.2 - glutaredoxin subgroup II, expressed                                | Chr1  | 3842753  | 3845541 +  | 7  | 1250 | 5.84 |
| LOC_Os08g02190.1 | expressed protein                                                                | Chr8  | 740821   | 745515 -   | 9  | 2301 | 5.84 |
| LOC_Os01g05940.1 | receptor kinase, putative, expressed                                             | Chr1  | 2830325  | 2836425 +  | 8  | 4489 | 5.84 |
| LOC_Os09g31040.1 | EF hand family protein, putative, expressed                                      | Chr9  | 18672137 | 18673106 + | 1  | 1002 | 5.84 |
| LOC_Os09g39910.3 | ABC transporter, ATP-binding protein, putative, expressed                        | Chr9  | 22883045 | 22887564 - | 5  | 2775 | 5.84 |
| LOC_Os03g15960.1 | hsp20/alpha crystallin family protein, putative, expressed                       | Chr3  | 8805567  | 8806601 +  | 1  | 1067 | 5.85 |
| LOC_Os03g15960.2 | hsp20/alpha crystallin family protein, putative, expressed                       | Chr3  | 8805567  | 8806601 +  | 2  | 1057 | 5.85 |
| LOC_Os03g63999.1 | expressed protein                                                                | Chr3  | 36171632 | 36172326 + | 1  | 727  | 5.85 |
| LOC_Os05g40990.1 | NADH-cytochrome b5 reductase, putative, expressed                                | Chr5  | 24027775 | 24030928 + | 9  | 1769 | 5.85 |
| LOC_Os03g19270.1 | universal stress protein domain containing protein, putative, expressed          | Chr3  | 10839437 | 10840785 - | 4  | 1186 | 5.85 |
| LOC_Os02g25060.2 | NTMC2Type1.2 protein, putative, expressed                                        | Chr2  | 14531003 | 14537503 - | 12 | 2517 | 5.85 |
| LOC_Os04g53350.1 | expressed protein                                                                | Chr4  | 31768908 | 31773173 - | 3  | 2834 | 5.85 |
| LOC_Os03g20100.1 | S1 RNA binding domain containing protein, expressed                              | Chr3  | 11351431 | 11355773 - | 7  | 1813 | 5.85 |
| LOC_Os06g46060.1 | expressed protein                                                                | Chr6  | 27923524 | 27926280 - | 1  | 2789 | 5.85 |
| LOC_Os10g42754.1 | expressed protein                                                                | Chr10 | 23066471 | 23069754 - | 6  | 1665 | 5.85 |
| LOC_Os03g44780.1 | elongation factor Tu family protein, putative, expressed                         | Chr3  | 25250967 | 25254323 + | 1  | 3389 | 5.85 |
| LOC_Os02g02424.3 | ZOS2-02 - C2H2 zinc finger protein, expressed                                    | Chr2  | 853767   | 857136 -   | 6  | 1782 | 5.85 |
| LOC_Os08g43230.1 | TraB family protein, putative, expressed                                         | Chr8  | 27329441 | 27331356 + | 7  | 1466 | 5.85 |
| LOC_Os05g36960.1 | protein kinase, putative, expressed                                              | Chr5  | 21587642 | 21593417 + | 14 | 3807 | 5.85 |
| LOC_Os07g05740.1 | receptor-like protein kinase 2 precursor, putative, expressed                    | Chr7  | 2757219  | 2761922 -  | 3  | 4259 | 5.85 |
| LOC_Os01g68480.1 | thioredoxin, putative, expressed                                                 | Chr1  | 39794226 | 39795811 + | 3  | 1366 | 5.85 |
| LOC_Os01g68700.1 | BHLH transcription factor, putative, expressed                                   | Chr1  | 39894642 | 39897761 - | 8  | 2688 | 5.85 |
| LOC_Os01g68700.2 | BHLH transcription factor, putative, expressed                                   | Chr1  | 39894642 | 39897761 - | 8  | 2684 | 5.85 |
| LOC_Os07g44940.1 | ATP12 ATPase, putative, expressed                                                | Chr7  | 26806422 | 26809063 - | 4  | 1337 | 5.85 |
| LOC_Os02g56880.1 | transcriptional corepressor LEUNIG, putative, expressed                          | Chr2  | 34862547 | 34872882 - | 18 | 3732 | 5.85 |
| LOC_Os09g24710.1 | alpha/beta hydrolase fold, putative, expressed                                   | Chr9  | 14711584 | 14716679 + | 4  | 1629 | 5.85 |
| LOC_Os01g04490.1 | Ser/Thr protein kinase, putative, expressed                                      | Chr1  | 1998427  | 2002855 +  | 5  | 1894 | 5.85 |
| LOC_Os10g33960.4 | START domain containing protein, expressed                                       | Chr10 | 18085536 | 18092499 + | 13 | 2500 | 5.86 |
| LOC_Os04g37950.1 | ubiquitin carboxyl-terminal hydrolase domain containing protein, expressed       | Chr4  | 22567318 | 22573600 - | 6  | 2202 | 5.86 |
| LOC_Os09g23334.1 | expressed protein                                                                | Chr9  | 13850911 | 13854115 + | 3  | 959  | 5.86 |
| LOC_Os09g24240.1 | pentatricopeptide, putative, expressed                                           | Chr9  | 14390145 | 14392934 - | 1  | 2822 | 5.86 |
| LOC_Os01g08880.1 | expressed protein                                                                | Chr1  | 4454755  | 4457084 -  | 6  | 861  | 5.86 |

|                  |                                                                                    |       |          |            |    |      |      |
|------------------|------------------------------------------------------------------------------------|-------|----------|------------|----|------|------|
| LOC_Os03g07220.1 | PPR repeat domain containing protein, putative, expressed                          | Chr3  | 3690005  | 3694437 +  | 5  | 4174 | 5.86 |
| LOC_Os03g41229.2 | expressed protein                                                                  | Chr3  | 22930270 | 22937157 + | 10 | 2033 | 5.86 |
| LOC_Os07g35060.2 | OsFBX238 - F-box domain containing protein, expressed                              | Chr7  | 21002829 | 21004747 + | 2  | 1782 | 5.86 |
| LOC_Os07g35060.1 | OsFBX238 - F-box domain containing protein, expressed                              | Chr7  | 21002829 | 21004747 + | 2  | 1801 | 5.86 |
| LOC_Os05g32474.1 | expressed protein                                                                  | Chr5  | 18969220 | 18970726 - | 1  | 1539 | 5.86 |
| LOC_Os06g16420.1 | amino acid transporter, putative, expressed                                        | Chr6  | 9396130  | 9399130 +  | 5  | 2214 | 5.86 |
| LOC_Os06g16420.3 | amino acid transporter, putative, expressed                                        | Chr6  | 9396149  | 9399130 +  | 4  | 2332 | 5.86 |
| LOC_Os06g16420.2 | amino acid transporter, putative, expressed                                        | Chr6  | 9396130  | 9399130 +  | 4  | 2441 | 5.86 |
| LOC_Os08g32880.1 | disease resistance protein RPM1, putative, expressed                               | Chr8  | 20389564 | 20392287 + | 1  | 2756 | 5.86 |
| LOC_Os05g46320.1 | OsFBX173 - F-box domain containing protein, expressed                              | Chr5  | 26846082 | 26847985 - | 1  | 1936 | 5.86 |
| LOC_Os09g24710.2 | alpha/beta hydrolase fold, putative, expressed                                     | Chr9  | 14711584 | 14716765 + | 5  | 1682 | 5.86 |
| LOC_Os07g25450.1 | histone-lysine N-methyltransferase, putative, expressed                            | Chr7  | 14563261 | 14570225 + | 2  | 3072 | 5.87 |
| LOC_Os12g05040.6 | heavy-metal-associated domain-containing protein, putative, expressed              | Chr12 | 2193733  | 2198850 +  | 9  | 2653 | 5.87 |
| LOC_Os03g39407.1 | expressed protein                                                                  | Chr3  | 21900414 | 21904231 + | 3  | 2941 | 5.87 |
| LOC_Os02g06760.3 | expressed protein                                                                  | Chr2  | 3411220  | 3415305 +  | 4  | 680  | 5.87 |
| LOC_Os04g45200.2 | DNA binding protein, putative, expressed                                           | Chr4  | 26716419 | 26719506 - | 2  | 1482 | 5.87 |
| LOC_Os07g05740.2 | receptor-like protein kinase 2 precursor, putative, expressed                      | Chr7  | 2757224  | 2761925 -  | 2  | 4599 | 5.87 |
| LOC_Os05g40320.1 | PPR repeat domain containing protein, putative, expressed                          | Chr5  | 23692827 | 23697395 + | 4  | 3219 | 5.87 |
| LOC_Os10g37670.1 | actin-depolymerizing factor, putative, expressed                                   | Chr10 | 20160992 | 20162434 - | 3  | 857  | 5.87 |
| LOC_Os02g01940.1 | transcription factor jumonji, putative, expressed                                  | Chr2  | 509377   | 517148 -   | 16 | 3506 | 5.87 |
| LOC_Os06g11140.1 | pyridine nucleotide-disulphide oxidoreductase domain containing protein, expressed | Chr6  | 5840075  | 5844550 -  | 11 | 2350 | 5.87 |
| LOC_Os02g12730.2 | beta-galactosidase precursor, putative, expressed                                  | Chr2  | 6656719  | 6660624 -  | 16 | 2831 | 5.87 |
| LOC_Os12g07590.3 | Protein-tyrosine phosphatase domain containing protein, expressed                  | Chr12 | 3792401  | 3797497 -  | 7  | 1450 | 5.87 |
| LOC_Os03g10940.1 | casein kinase II subunit alpha-2, putative, expressed                              | Chr3  | 5616047  | 5620727 -  | 10 | 1819 | 5.87 |
| LOC_Os02g02424.1 | ZOS2-02 - C2H2 zinc finger protein, expressed                                      | Chr2  | 853767   | 859880 -   | 7  | 1822 | 5.88 |
| LOC_Os06g49140.1 | ribosomal RNA large subunit methyltransferase J, putative, expressed               | Chr6  | 29782067 | 29784932 + | 11 | 1651 | 5.88 |
| LOC_Os10g20310.3 | thioredoxin fold, putative, expressed                                              | Chr10 | 10216070 | 10218311 - | 3  | 1679 | 5.88 |
| LOC_Os01g45070.1 | peptide deformylase, putative, expressed                                           | Chr1  | 25585751 | 25589162 - | 7  | 1429 | 5.88 |
| LOC_Os05g44810.1 | OsiAA18 - Auxin-responsive Aux/IAA gene family member, expressed                   | Chr5  | 26052916 | 26055714 - | 6  | 1588 | 5.88 |
| LOC_Os09g29950.2 | OsPOP19 - Putative Prolyl Oligopeptidase homologue, expressed                      | Chr9  | 18224585 | 18230942 - | 12 | 3417 | 5.88 |
| LOC_Os04g42174.1 | expressed protein                                                                  | Chr4  | 24962835 | 24966542 + | 3  | 3597 | 5.88 |
| LOC_Os10g36270.1 | disease resistance RPP13-like protein 1, putative, expressed                       | Chr10 | 19389025 | 19396741 + | 3  | 4663 | 5.88 |
| LOC_Os05g37700.1 | periplasmic beta-glucosidase precursor, putative, expressed                        | Chr5  | 22068489 | 22072900 + | 8  | 3510 | 5.88 |
| LOC_Os05g37700.2 | periplasmic beta-glucosidase precursor, putative, expressed                        | Chr5  | 22068411 | 22072905 + | 8  | 3576 | 5.88 |
| LOC_Os06g46900.4 | phosphosulfolactate synthase-related protein, putative, expressed                  | Chr6  | 28463764 | 28466297 + | 4  | 1617 | 5.88 |
| LOC_Os06g46900.1 | phosphosulfolactate synthase-related protein, putative, expressed                  | Chr6  | 28463764 | 28466297 - | 5  | 1537 | 5.88 |
| LOC_Os04g01530.2 | adenylate kinase, putative, expressed                                              | Chr4  | 362891   | 367448 -   | 9  | 1500 | 5.88 |
| LOC_Os12g03870.1 | major facilitator superfamily antiporter, putative, expressed                      | Chr12 | 1594733  | 1600962 -  | 16 | 1910 | 5.88 |
| LOC_Os03g51150.1 | expressed protein                                                                  | Chr3  | 29272320 | 29274639 - | 2  | 2292 | 5.89 |
| LOC_Os01g63710.3 | CDC6 - Putative DNA replication initiation protein, expressed                      | Chr1  | 36951117 | 36956735 + | 16 | 4257 | 5.89 |
| LOC_Os01g01302.1 | shikimate kinase, putative, expressed                                              | Chr1  | 145577   | 147852 +   | 9  | 1443 | 5.89 |
| LOC_Os12g02730.1 | histidine triad family protein, putative, expressed                                | Chr12 | 964545   | 966927 +   | 4  | 907  | 5.89 |
| LOC_Os02g51119.1 | expressed protein                                                                  | Chr2  | 31281912 | 31284049 - | 3  | 1828 | 5.89 |
| LOC_Os01g40980.2 | helicase, putative, expressed                                                      | Chr1  | 23179790 | 23186976 - | 17 | 3006 | 5.89 |
| LOC_Os02g57140.2 | expressed protein                                                                  | Chr2  | 34991838 | 34996641 + | 6  | 3964 | 5.89 |

|                       |                                                                                         |       |          |            |    |      |      |
|-----------------------|-----------------------------------------------------------------------------------------|-------|----------|------------|----|------|------|
| LOC_Os08g40430.1      | mTERF domain containing protein, expressed                                              | Chr8  | 25588052 | 25590594 - | 3  | 2333 | 5.89 |
| LOC_Os01g55950.1      | acetamidase, putative, expressed                                                        | Chr1  | 32226885 | 32229632 - | 7  | 1478 | 5.89 |
| LOC_Os04g43164.2      | expressed protein                                                                       | Chr4  | 25551159 | 25553800 - | 4  | 1664 | 5.89 |
| LOC_Os02g47640.1      | OsFBT4 - F-box and tubby domain containing protein, expressed                           | Chr2  | 29108497 | 29112230 + | 4  | 2656 | 5.89 |
| ChrSy.fgenesh.mRNA.50 | expressed protein                                                                       | ChrSy | 350944   | 352807 +   | 6  | 768  | 5.89 |
| LOC_Os07g04190.1      | receptor protein kinase CLAVATA1 precursor, putative, expressed                         | Chr7  | 1812193  | 1816108 -  | 2  | 3787 | 5.90 |
| LOC_Os10g27450.2      | tetrapyrrole methylase family protein, putative, expressed                              | Chr10 | 14474781 | 14478809 - | 10 | 1865 | 5.90 |
| LOC_Os11g03160.1      | glycosyl transferase, family 8, putative, expressed                                     | Chr11 | 1136056  | 1141411 -  | 9  | 3100 | 5.90 |
| LOC_Os06g03910.1      | hydrolase, NUDIX family, domain containing protein, expressed                           | Chr6  | 1574484  | 1577176 -  | 6  | 1487 | 5.90 |
| LOC_Os09g29950.1      | OsPOP19 - Putative Prolyl Oligopeptidase homologue, expressed                           | Chr9  | 18224585 | 18230942 - | 11 | 3497 | 5.90 |
| LOC_Os06g46900.3      | phosphosulfolactate synthase-related protein, putative, expressed                       | Chr6  | 28463764 | 28466237 - | 5  | 1906 | 5.90 |
| LOC_Os08g33740.1      | CSLA11 - cellulose synthase-like family A, expressed                                    | Chr8  | 21078139 | 21086651 + | 11 | 2661 | 5.90 |
| LOC_Os02g35500.1      | NAD binding domain of 6-phosphogluconate dehydrogenase containing protein, expressed    | Chr2  | 21344262 | 21348569 + | 8  | 1520 | 5.90 |
| LOC_Os04g43164.1      | expressed protein                                                                       | Chr4  | 25551322 | 25553800 - | 4  | 1506 | 5.90 |
| LOC_Os01g08290.1      | transmembrane protein, putative, expressed                                              | Chr1  | 4063704  | 4066374 +  | 4  | 1836 | 5.90 |
| LOC_Os08g31219.1      | ribosomal protein L27, putative, expressed                                              | Chr8  | 19304739 | 19306021 + | 3  | 1040 | 5.90 |
| LOC_Os01g36580.1      | auxin-induced protein 5NG4, putative, expressed                                         | Chr1  | 20299522 | 20302467 - | 7  | 1673 | 5.90 |
| LOC_Os03g63250.1      | brefeldin A-sensitive Golgi protein-like, putative, expressed                           | Chr3  | 35736065 | 35741607 - | 12 | 2989 | 5.90 |
| LOC_Os02g04690.1      | cycloartenol synthase, putative, expressed                                              | Chr2  | 2110921  | 2120419 -  | 19 | 2978 | 5.91 |
| LOC_Os08g28214.4      | tesmin/TSO1-like CXC domain containing protein, expressed                               | Chr8  | 17214130 | 17221240 - | 8  | 2548 | 5.91 |
| LOC_Os08g28214.3      | tesmin/TSO1-like CXC domain containing protein, expressed                               | Chr8  | 17214129 | 17221240 - | 8  | 2515 | 5.91 |
| LOC_Os02g06760.2      | expressed protein                                                                       | Chr2  | 3411220  | 3415304 +  | 4  | 708  | 5.91 |
| LOC_Os02g15930.1      | expressed protein                                                                       | Chr2  | 9021454  | 9023139 +  | 2  | 1656 | 5.91 |
| LOC_Os03g09310.1      | frigida, putative, expressed                                                            | Chr3  | 4862183  | 4866739 -  | 3  | 1881 | 5.91 |
| LOC_Os03g09310.2      | frigida, putative, expressed                                                            | Chr3  | 4862184  | 4866739 -  | 2  | 1932 | 5.91 |
| LOC_Os06g33549.1      | protein phosphatase 2C, putative, expressed                                             | Chr6  | 19531562 | 19542004 - | 8  | 1669 | 5.91 |
| LOC_Os06g10440.1      | gb protein, putative, expressed                                                         | Chr6  | 5369569  | 5372876 +  | 6  | 984  | 5.91 |
| LOC_Os02g39040.1      | mTERF domain containing protein, expressed                                              | Chr2  | 23575780 | 23578282 + | 4  | 1851 | 5.91 |
| LOC_Os03g59160.1      | elongation factor P, putative, expressed                                                | Chr3  | 33688274 | 33692248 - | 11 | 1141 | 5.91 |
| LOC_Os02g40500.1      | OsGrx_C2.1 - glutaredoxin subgroup I, expressed                                         | Chr2  | 24566319 | 24568216 + | 4  | 734  | 5.91 |
| LOC_Os01g67740.1      | chromosome segregation protein, putative, expressed                                     | Chr1  | 39365920 | 39374228 - | 21 | 4765 | 5.91 |
| LOC_Os05g30430.1      | expressed protein                                                                       | Chr5  | 17637784 | 17641319 - | 4  | 1686 | 5.91 |
| LOC_Os02g51590.1      | phosphoglycerate mutase, putative, expressed                                            | Chr2  | 31597624 | 31600640 + | 9  | 1958 | 5.91 |
| LOC_Os12g09000.1      | phosphomethylpyrimidine kinase/thiamin-phosphate pyrophosphorylase, putative, expressed | Chr12 | 4706847  | 4711336 +  | 9  | 2354 | 5.92 |
| LOC_Os12g09000.2      | phosphomethylpyrimidine kinase/thiamin-phosphate pyrophosphorylase, putative, expressed | Chr12 | 4706847  | 4711336 +  | 9  | 2358 | 5.92 |
| LOC_Os10g27450.1      | tetrapyrrole methylase family protein, putative, expressed                              | Chr10 | 14474781 | 14478810 - | 9  | 1935 | 5.92 |
| LOC_Os03g29730.1      | expressed protein                                                                       | Chr3  | 16937580 | 16940919 - | 9  | 1566 | 5.92 |
| LOC_Os01g59190.1      | expressed protein                                                                       | Chr1  | 34192980 | 34194169 + | 2  | 1019 | 5.92 |
| LOC_Os01g16950.1      | zinc finger, C3HC4 type domain containing protein, expressed                            | Chr1  | 9690235  | 9692180 +  | 2  | 1590 | 5.92 |
| LOC_Os05g48980.1      | ras-related protein, putative, expressed                                                | Chr5  | 28092825 | 28094580 - | 2  | 1217 | 5.92 |
| LOC_Os10g20310.2      | thioredoxin fold, putative, expressed                                                   | Chr10 | 10216071 | 10218311 - | 3  | 1744 | 5.92 |
| LOC_Os11g38990.1      | peptidyl-prolyl cis-trans isomerase, putative, expressed                                | Chr11 | 23212467 | 23217461 + | 9  | 1384 | 5.92 |
| LOC_Os06g46900.2      | phosphosulfolactate synthase-related protein, putative, expressed                       | Chr6  | 28463764 | 28466237 - | 4  | 2070 | 5.92 |
| LOC_Os09g31220.5      | expressed protein                                                                       | Chr9  | 18779585 | 18782063 - | 4  | 1429 | 5.92 |
| LOC_Os11g32369.1      | expressed protein                                                                       | Chr11 | 19118531 | 19126775 - | 10 | 3070 | 5.92 |

|                  |                                                                                                    |       |          |            |    |      |      |
|------------------|----------------------------------------------------------------------------------------------------|-------|----------|------------|----|------|------|
| LOC_Os08g40580.4 | methyltransferase domain containing protein, expressed                                             | Chr8  | 25687638 | 25690627 - | 9  | 1348 | 5.92 |
| LOC_Os10g25130.1 | aminotransferase, classes I and II, domain containing protein, expressed                           | Chr10 | 12967817 | 12974250 + | 15 | 2654 | 5.92 |
| LOC_Os06g13570.1 | expressed protein                                                                                  | Chr6  | 7488066  | 7496669 +  | 9  | 2704 | 5.92 |
| LOC_Os11g38990.2 | peptidyl-prolyl cis-trans isomerase, putative, expressed                                           | Chr11 | 23212467 | 23217469 + | 9  | 1389 | 5.92 |
| LOC_Os01g62380.1 | fasciclin-like arabinogalactan protein, putative, expressed                                        | Chr1  | 36100441 | 36104293 - | 1  | 3885 | 5.92 |
| LOC_Os02g52150.2 | heat shock 22 kDa protein, mitochondrial precursor, putative, expressed                            | Chr2  | 31920854 | 31922712 + | 2  | 1818 | 5.92 |
| LOC_Os02g52150.1 | heat shock 22 kDa protein, mitochondrial precursor, putative, expressed                            | Chr2  | 31920854 | 31922712 + | 2  | 1821 | 5.92 |
| LOC_Os05g30430.2 | expressed protein                                                                                  | Chr5  | 17637782 | 17641309 - | 3  | 1737 | 5.92 |
| LOC_Os01g51700.1 | ras-related protein, putative, expressed                                                           | Chr1  | 29730128 | 29735114 - | 7  | 1309 | 5.92 |
| LOC_Os01g10860.1 | expressed protein                                                                                  | Chr1  | 5794747  | 5797674 -  | 5  | 1271 | 5.92 |
| LOC_Os09g27580.3 | potassium transporter, putative, expressed                                                         | Chr9  | 16755806 | 16759577 + | 8  | 2608 | 5.93 |
| LOC_Os08g40580.1 | methyltransferase domain containing protein, expressed                                             | Chr8  | 25687620 | 25690627 - | 9  | 1370 | 5.93 |
| LOC_Os05g02400.1 | RNA recognition motif containing protein, expressed                                                | Chr5  | 788617   | 791711 -   | 4  | 2017 | 5.93 |
| LOC_Os07g04200.1 | bacterial transferase hexapeptide domain containing protein, expressed                             | Chr7  | 1832931  | 1835739 -  | 10 | 1555 | 5.93 |
| LOC_Os05g50190.1 | protein kinase domain containing protein, expressed                                                | Chr5  | 28760152 | 28763886 - | 6  | 1993 | 5.93 |
| LOC_Os05g49610.1 | ubiquitin carboxyl-terminal hydrolase, family 1, putative, expressed                               | Chr5  | 28464100 | 28466023 + | 1  | 1956 | 5.93 |
| LOC_Os05g34800.1 | expressed protein                                                                                  | Chr5  | 20648285 | 20650530 - | 1  | 2278 | 5.93 |
| LOC_Os07g48520.2 | gamete-specific hydroxyproline-rich glycoprotein a2, putative, expressed                           | Chr7  | 29024590 | 29029437 + | 4  | 4549 | 5.93 |
| LOC_Os05g46200.3 | beta-galactosidase 8 precursor, putative, expressed                                                | Chr5  | 26794369 | 26801505 - | 19 | 3370 | 5.93 |
| LOC_Os05g46200.1 | beta-galactosidase 8 precursor, putative, expressed                                                | Chr5  | 26794369 | 26801505 - | 19 | 3375 | 5.93 |
| LOC_Os07g42860.1 | cyclin, putative, expressed                                                                        | Chr7  | 25662767 | 25665316 - | 6  | 2051 | 5.93 |
| LOC_Os05g50200.2 | expressed protein                                                                                  | Chr5  | 28767434 | 28774104 - | 14 | 2174 | 5.93 |
| LOC_Os08g06880.1 | expressed protein                                                                                  | Chr8  | 3839189  | 3842448 +  | 7  | 1129 | 5.93 |
| LOC_Os08g13905.1 | expressed protein                                                                                  | Chr8  | 8303870  | 8307351 +  | 6  | 1937 | 5.94 |
| LOC_Os09g31220.9 | expressed protein                                                                                  | Chr9  | 18779585 | 18782066 - | 3  | 1546 | 5.94 |
| LOC_Os04g45200.1 | DNA binding protein, putative, expressed                                                           | Chr4  | 26716419 | 26719506 - | 3  | 1696 | 5.94 |
| LOC_Os04g51080.1 | scramblase, putative, expressed                                                                    | Chr4  | 30241588 | 30246851 + | 11 | 2043 | 5.94 |
| LOC_Os03g34040.1 | ribosomal protein, putative, expressed                                                             | Chr3  | 19412908 | 19417098 - | 2  | 1477 | 5.94 |
| LOC_Os04g45490.1 | elongation factor, putative, expressed                                                             | Chr4  | 26917882 | 26920646 - | 3  | 2402 | 5.94 |
| LOC_Os09g27580.2 | potassium transporter, putative, expressed                                                         | Chr9  | 16754449 | 16759734 + | 8  | 3150 | 5.94 |
| LOC_Os09g27580.1 | potassium transporter, putative, expressed                                                         | Chr9  | 16756249 | 16759734 + | 7  | 2761 | 5.94 |
| LOC_Os07g08120.2 | BTBT2 - Bric-a-Brac, Tramtrack, Broad Complex BTB domain with tetratricopeptide repeats, expressed | Chr7  | 4118354  | 4123587 +  | 6  | 3749 | 5.94 |
| LOC_Os03g08450.1 | eukaryotic translation initiation factor 3 subunit K, putative, expressed                          | Chr3  | 4339450  | 4342736 -  | 8  | 1357 | 5.94 |
| LOC_Os08g03840.1 | expressed protein                                                                                  | Chr8  | 1833542  | 1836634 +  | 5  | 2119 | 5.94 |
| LOC_Os11g45250.2 | ribonucleases P/MRP protein subunit POP1 containing protein, expressed                             | Chr11 | 27383516 | 27388433 - | 10 | 3099 | 5.94 |
| LOC_Os11g45250.1 | ribonucleases P/MRP protein subunit POP1 containing protein, expressed                             | Chr11 | 27383516 | 27388433 - | 10 | 3122 | 5.94 |
| LOC_Os03g37260.1 | pentatricopeptide, putative, expressed                                                             | Chr3  | 20650253 | 20653294 + | 1  | 3074 | 5.94 |
| LOC_Os11g37130.1 | mttA/Hcf106 family protein, putative, expressed                                                    | Chr11 | 21920159 | 21923345 - | 6  | 1562 | 5.94 |
| LOC_Os07g08120.1 | BTBT2 - Bric-a-Brac, Tramtrack, Broad Complex BTB domain with tetratricopeptide repeats, expressed | Chr7  | 4118354  | 4123592 +  | 5  | 3852 | 5.94 |
| LOC_Os03g62680.1 | expressed protein                                                                                  | Chr3  | 35470284 | 35473955 - | 9  | 1818 | 5.95 |
| LOC_Os05g38219.2 | expressed protein                                                                                  | Chr5  | 22406439 | 22410427 + | 5  | 2879 | 5.95 |
| LOC_Os05g38219.1 | expressed protein                                                                                  | Chr5  | 22406439 | 22412412 + | 7  | 3308 | 5.95 |
| LOC_Os02g04915.1 | expressed protein                                                                                  | Chr2  | 2274553  | 2275713 +  | 1  | 1193 | 5.95 |
| LOC_Os12g23760.1 | growth regulator related protein, putative, expressed                                              | Chr12 | 13492035 | 13499278 + | 9  | 2481 | 5.95 |
| LOC_Os06g09910.1 | phosphopantothencycysteine decarboxylase, putative, expressed                                      | Chr6  | 5054303  | 5056846 -  | 3  | 1850 | 5.95 |

|                  |                                                                           |       |          |            |    |      |      |
|------------------|---------------------------------------------------------------------------|-------|----------|------------|----|------|------|
| LOC_Os06g09910.2 | phosphopantothencycysteine decarboxylase, putative, expressed             | Chr6  | 5054303  | 5056834 -  | 3  | 1851 | 5.95 |
| LOC_Os03g59600.1 | mitochondrial Rho GTPase 1, putative, expressed                           | Chr3  | 33936155 | 33937972 - | 5  | 922  | 5.95 |
| LOC_Os04g01530.1 | adenylate kinase, putative, expressed                                     | Chr4  | 364005   | 367448 -   | 9  | 1526 | 5.95 |
| LOC_Os02g04690.2 | cycloartenol synthase, putative, expressed                                | Chr2  | 2110921  | 2120419 -  | 21 | 3204 | 5.95 |
| LOC_Os08g14610.1 | DRD1, putative, expressed                                                 | Chr8  | 8784440  | 8793976 -  | 12 | 3831 | 5.95 |
| LOC_Os10g20310.1 | thioredoxin fold, putative, expressed                                     | Chr10 | 10216045 | 10218319 - | 2  | 2240 | 5.95 |
| LOC_Os09g05030.1 | armadillo/beta-catenin-like repeat family protein, expressed              | Chr9  | 2703213  | 2707348 -  | 1  | 4168 | 5.96 |
| LOC_Os11g37070.1 | expressed protein                                                         | Chr11 | 21883171 | 21888743 - | 3  | 2000 | 5.96 |
| LOC_Os12g18130.1 | expressed protein                                                         | Chr12 | 10454466 | 10458548 - | 4  | 1860 | 5.96 |
| LOC_Os03g58650.2 | expressed protein                                                         | Chr3  | 33402553 | 33405439 + | 8  | 1482 | 5.96 |
| LOC_Os02g04730.1 | cycloartenol synthase, putative, expressed                                | Chr2  | 2148473  | 2153358 -  | 12 | 2241 | 5.96 |
| LOC_Os08g44000.1 | uncharacterized protein ycf39, putative, expressed                        | Chr8  | 27695184 | 27700281 - | 9  | 3817 | 5.96 |
| LOC_Os03g19270.4 | universal stress protein domain containing protein, putative, expressed   | Chr3  | 10839453 | 10840785 - | 3  | 1248 | 5.96 |
| LOC_Os01g48339.1 | expressed protein                                                         | Chr1  | 27703978 | 27705198 + | 2  | 1208 | 5.96 |
| LOC_Os07g31540.1 | ubiquitin family protein, putative, expressed                             | Chr7  | 18717034 | 18725768 - | 18 | 4371 | 5.96 |
| LOC_Os04g53540.4 | homeobox and START domains containing protein, putative, expressed        | Chr4  | 31899718 | 31906029 - | 12 | 3749 | 5.97 |
| LOC_Os04g53540.1 | homeobox and START domains containing protein, putative, expressed        | Chr4  | 31899718 | 31907060 - | 12 | 4207 | 5.97 |
| LOC_Os04g53540.3 | homeobox and START domains containing protein, putative, expressed        | Chr4  | 31899718 | 31907122 - | 13 | 4216 | 5.97 |
| LOC_Os04g53540.2 | homeobox and START domains containing protein, putative, expressed        | Chr4  | 31899718 | 31907122 - | 12 | 4269 | 5.97 |
| LOC_Os06g30440.1 | OsGH3.7 - Probable indole-3-acetic acid-amido synthetase, expressed       | Chr6  | 17586899 | 17590682 - | 4  | 2458 | 5.97 |
| LOC_Os12g08280.1 | inositol-1-monophosphatase, putative, expressed                           | Chr12 | 4216563  | 4219484 -  | 8  | 1662 | 5.97 |
| LOC_Os08g19140.1 | adenylate kinase family protein, putative, expressed                      | Chr8  | 11442523 | 11453895 - | 19 | 2887 | 5.97 |
| LOC_Os04g45610.1 | expressed protein                                                         | Chr4  | 26978120 | 26982173 - | 4  | 2000 | 5.97 |
| LOC_Os07g39590.1 | spotted leaf 11, putative, expressed                                      | Chr7  | 23721772 | 23724795 + | 2  | 2057 | 5.97 |
| LOC_Os03g17560.1 | expressed protein                                                         | Chr3  | 9757006  | 9759331 +  | 5  | 1115 | 5.97 |
| LOC_Os07g14350.1 | methyltransferase, putative, expressed                                    | Chr7  | 8194024  | 8199887 +  | 7  | 1616 | 5.97 |
| LOC_Os03g04260.1 | glutathione S-transferase, putative, expressed                            | Chr3  | 1954669  | 1955969 -  | 2  | 1064 | 5.97 |
| LOC_Os04g47860.8 | ZOS4-11 - C2H2 zinc finger protein, expressed                             | Chr4  | 28408664 | 28410885 + | 2  | 1599 | 5.97 |
| LOC_Os08g09260.1 | tRNA synthetase, putative, expressed                                      | Chr8  | 5379310  | 5384023 -  | 10 | 1412 | 5.97 |
| LOC_Os07g33310.1 | MATE efflux family protein, putative, expressed                           | Chr7  | 19911361 | 19914576 + | 7  | 2206 | 5.97 |
| LOC_Os04g23830.1 | exonuclease, putative, expressed                                          | Chr4  | 13611018 | 13616050 - | 7  | 869  | 5.97 |
| LOC_Os01g12090.1 | ribosomal protein S6 family protein, putative, expressed                  | Chr1  | 6583822  | 6586889 +  | 4  | 749  | 5.97 |
| LOC_Os01g73280.1 | expressed protein                                                         | Chr1  | 42472609 | 42474070 + | 3  | 570  | 5.97 |
| LOC_Os01g59070.1 | expressed protein                                                         | Chr1  | 34135802 | 34137584 + | 1  | 1815 | 5.97 |
| LOC_Os07g06080.1 | FAD dependent oxidoreductase domain containing protein, expressed         | Chr7  | 2945227  | 2947295 +  | 2  | 2040 | 5.97 |
| LOC_Os09g02130.1 | expressed protein                                                         | Chr9  | 799487   | 806530 +   | 7  | 1557 | 5.97 |
| LOC_Os01g52560.1 | Plant PDR ABC transporter associated domain containing protein, expressed | Chr1  | 30216047 | 30222975 + | 17 | 4236 | 5.97 |
| LOC_Os11g13570.1 | gibberellin receptor GID1L2, putative, expressed                          | Chr11 | 7437635  | 7439156 -  | 1  | 1554 | 5.97 |
| LOC_Os06g16290.1 | ribosomal protein L7Ae, putative, expressed                               | Chr6  | 9283140  | 9285250 +  | 4  | 944  | 5.97 |
| LOC_Os01g74190.1 | radical SAM enzyme, putative, expressed                                   | Chr1  | 42977145 | 42979816 - | 10 | 1853 | 5.97 |
| LOC_Os03g41229.1 | expressed protein                                                         | Chr3  | 22930270 | 22937157 + | 10 | 2150 | 5.97 |
| LOC_Os08g11220.6 | expressed protein                                                         | Chr8  | 6598207  | 6603406 +  | 4  | 1028 | 5.97 |
| LOC_Os10g35260.1 | Rf1, mitochondrial precursor, putative, expressed                         | Chr10 | 18846830 | 18849084 - | 4  | 1682 | 5.98 |
| LOC_Os07g28470.2 | coiled-coil domain-containing protein 111, putative, expressed            | Chr7  | 16660287 | 16668229 + | 14 | 2518 | 5.98 |
| LOC_Os12g07260.1 | PPR repeat domain containing protein, putative, expressed                 | Chr12 | 3566986  | 3572003 -  | 4  | 2597 | 5.98 |

|                  |                                                                                            |       |          |            |    |      |      |
|------------------|--------------------------------------------------------------------------------------------|-------|----------|------------|----|------|------|
| LOC_Os12g07590.2 | Protein-tyrosine phosphatase domain containing protein, expressed                          | Chr12 | 3792401  | 3797497 -  | 8  | 1625 | 5.98 |
| LOC_Os06g12020.1 | membrane-anchored ubiquitin-fold protein, putative, expressed                              | Chr6  | 6435824  | 6439822 +  | 3  | 1244 | 5.98 |
| LOC_Os02g06760.1 | expressed protein                                                                          | Chr2  | 3411221  | 3415305 +  | 4  | 776  | 5.98 |
| LOC_Os02g33010.1 | expressed protein                                                                          | Chr2  | 19623033 | 19628774 - | 13 | 2859 | 5.98 |
| LOC_Os06g51100.1 | transmembrane protein, putative, expressed                                                 | Chr6  | 30907000 | 30913486 - | 10 | 2818 | 5.99 |
| LOC_Os06g51100.2 | transmembrane protein, putative, expressed                                                 | Chr6  | 30907000 | 30913463 - | 10 | 2741 | 5.99 |
| LOC_Os02g41580.1 | CAMK_CAMK_like.14 - CAMK includes calcium/calmodulin dependent protein kinases, expressed  | Chr2  | 24934934 | 24936468 + | 2  | 1482 | 5.99 |
| LOC_Os04g41140.1 | PPR repeat containing protein, expressed                                                   | Chr4  | 24399162 | 24402461 - | 2  | 2794 | 5.99 |
| LOC_Os08g06470.1 | transmembrane 9 superfamily member, putative, expressed                                    | Chr8  | 3630958  | 3635519 +  | 7  | 2720 | 5.99 |
| LOC_Os07g06090.1 | expressed protein                                                                          | Chr7  | 2946126  | 2949178 -  | 4  | 2013 | 5.99 |
| LOC_Os01g41930.1 | leucine rich repeat protein, putative, expressed                                           | Chr1  | 23775861 | 23779747 + | 1  | 3919 | 5.99 |
| LOC_Os11g35090.1 | kinesin motor domain containing protein, putative, expressed                               | Chr11 | 20571984 | 20577400 - | 14 | 2858 | 5.99 |
| LOC_Os08g11220.8 | expressed protein                                                                          | Chr8  | 6598207  | 6603406 +  | 4  | 1172 | 5.99 |
| LOC_Os03g42480.2 | expressed protein                                                                          | Chr3  | 23633268 | 23640082 - | 3  | 690  | 5.99 |
| LOC_Os03g42480.1 | expressed protein                                                                          | Chr3  | 23633268 | 23640054 - | 3  | 700  | 5.99 |
| LOC_Os09g27990.1 | annexin, putative, expressed                                                               | Chr9  | 16999259 | 17001374 - | 5  | 1853 | 5.99 |
| LOC_Os02g44330.1 | rho guanine nucleotide exchange factor, putative, expressed                                | Chr2  | 26820403 | 26823399 + | 5  | 1214 | 5.99 |
| LOC_Os02g07910.1 | fiber protein Fb15, putative, expressed                                                    | Chr2  | 4141499  | 4143676 +  | 2  | 849  | 5.99 |
| LOC_Os02g07910.2 | fiber protein Fb15, putative, expressed                                                    | Chr2  | 4141491  | 4143681 +  | 2  | 867  | 5.99 |
| LOC_Os08g02950.2 | expressed protein                                                                          | Chr8  | 1283078  | 1285520 -  | 4  | 1831 | 5.99 |
| LOC_Os03g54860.1 | 60S ribosomal protein L13a-2, putative, expressed                                          | Chr3  | 31180590 | 31190830 - | 4  | 851  | 5.99 |
| LOC_Os08g40919.2 | expressed protein                                                                          | Chr8  | 25889494 | 25893900 + | 3  | 2953 | 5.99 |
| LOC_Os03g21964.1 | expressed protein                                                                          | Chr3  | 12567937 | 12571044 + | 2  | 2698 | 5.99 |
| LOC_Os10g41580.1 | protein binding protein, putative, expressed                                               | Chr10 | 22373186 | 22375105 - | 4  | 1771 | 5.99 |
| LOC_Os08g06050.1 | OsTOP6A2 - Topoisomerase 6 subunit A homolog 2, expressed                                  | Chr8  | 3301039  | 3304257 -  | 10 | 1987 | 6.00 |
| LOC_Os03g46310.1 | expressed protein                                                                          | Chr3  | 26193470 | 26196514 + | 6  | 1160 | 6.00 |
| LOC_Os10g27090.1 | expressed protein                                                                          | Chr10 | 14278731 | 14283314 + | 4  | 3022 | 6.00 |
| LOC_Os04g36740.1 | potassium channel SKOR, putative, expressed                                                | Chr4  | 22192042 | 22197439 - | 12 | 2687 | 6.00 |
| LOC_Os04g16866.1 | photosystem II reaction center protein K precursor, putative, expressed                    | Chr4  | 9174386  | 9175114 +  | 1  | 761  | 6.00 |
| LOC_Os11g14230.1 | uncharacterized protein yqxC, putative, expressed                                          | Chr11 | 7964439  | 7969046 -  | 9  | 1655 | 6.00 |
| LOC_Os03g20640.1 | expressed protein                                                                          | Chr3  | 11677890 | 11680211 + | 9  | 1504 | 6.00 |
| LOC_Os01g65460.1 | beta-galactosidase precursor, putative, expressed                                          | Chr1  | 37994513 | 38001584 + | 20 | 4304 | 6.00 |
| LOC_Os01g60660.2 | methionyl-tRNA synthetase, putative, expressed                                             | Chr1  | 35069267 | 35074491 - | 10 | 1657 | 6.00 |
| LOC_Os07g33200.1 | expressed protein                                                                          | Chr7  | 19827230 | 19833195 + | 10 | 2427 | 6.00 |
| LOC_Os05g07220.2 | kelch repeat-containing protein, putative, expressed                                       | Chr5  | 3813306  | 3819769 -  | 11 | 4035 | 6.01 |
| LOC_Os05g07220.1 | kelch repeat-containing protein, putative, expressed                                       | Chr5  | 3813306  | 3819769 -  | 11 | 4192 | 6.01 |
| LOC_Os03g47620.1 | ankyrin, putative, expressed                                                               | Chr3  | 26962705 | 26970219 + | 12 | 1842 | 6.01 |
| LOC_Os05g45920.1 | S1 RNA binding domain containing protein, expressed                                        | Chr5  | 26608284 | 26612433 + | 9  | 1895 | 6.01 |
| LOC_Os01g68440.1 | expressed protein                                                                          | Chr1  | 39773091 | 39776770 + | 10 | 2006 | 6.01 |
| LOC_Os07g07270.1 | MBTB13 - Bric-a-Brac, Tramtrack, Broad Complex BTB domain with Mepirin and TRAF Homology I | Chr7  | 3610786  | 3614403 -  | 4  | 1856 | 6.01 |
| LOC_Os04g47906.2 | gamma-tubulin complex component 6, putative, expressed                                     | Chr4  | 28484045 | 28488670 - | 8  | 1493 | 6.01 |
| LOC_Os05g32600.1 | cyclin-dependent kinase D-1, putative, expressed                                           | Chr5  | 19083908 | 19089902 + | 7  | 2276 | 6.01 |
| LOC_Os05g32600.2 | cyclin-dependent kinase D-1, putative, expressed                                           | Chr5  | 19083891 | 19089905 + | 7  | 2253 | 6.01 |
| LOC_Os04g49920.1 | sensitivity to red light reduced protein 1, putative, expressed                            | Chr4  | 29770168 | 29773759 - | 5  | 2836 | 6.01 |
| LOC_Os01g14830.1 | ribosomal protein L3, putative, expressed                                                  | Chr1  | 8291337  | 8296221 +  | 5  | 1603 | 6.01 |



|                  |                                                                                             |       |          |            |    |      |      |
|------------------|---------------------------------------------------------------------------------------------|-------|----------|------------|----|------|------|
| LOC_Os03g08530.1 | aminotransferase, classes I and II, domain containing protein, expressed                    | Chr3  | 4384011  | 4389386 -  | 14 | 2662 | 6.01 |
| LOC_Os12g05040.3 | heavy-metal-associated domain-containing protein, putative, expressed                       | Chr12 | 2193867  | 2198850 +  | 8  | 2851 | 6.01 |
| LOC_Os08g03420.3 | kelch repeat protein, putative, expressed                                                   | Chr8  | 1600716  | 1603803 +  | 7  | 2272 | 6.01 |
| LOC_Os02g05420.1 | expressed protein                                                                           | Chr2  | 2607099  | 2611381 +  | 7  | 1910 | 6.01 |
| LOC_Os12g41180.1 | LSTK-1-like kinase, putative, expressed                                                     | Chr12 | 25518232 | 25522441 - | 14 | 2977 | 6.01 |
| LOC_Os04g51786.1 | containing DUF163, putative, expressed                                                      | Chr4  | 30685422 | 30687861 - | 8  | 1304 | 6.01 |
| LOC_Os09g36710.1 | peptidase, T1 family, putative, expressed                                                   | Chr9  | 21171653 | 21174067 + | 3  | 1265 | 6.01 |
| LOC_Os07g33210.1 | expressed protein                                                                           | Chr7  | 19838576 | 19842588 + | 8  | 1795 | 6.01 |
| LOC_Os01g57740.1 | expressed protein                                                                           | Chr1  | 33392410 | 33396091 + | 4  | 1571 | 6.02 |
| LOC_Os01g65110.1 | POT family protein, expressed                                                               | Chr1  | 37795596 | 37797746 + | 4  | 2018 | 6.02 |
| LOC_Os12g05040.5 | heavy-metal-associated domain-containing protein, putative, expressed                       | Chr12 | 2193867  | 2198850 +  | 7  | 3045 | 6.02 |
| LOC_Os11g01590.1 | nodulin, putative, expressed                                                                | Chr11 | 341400   | 345820 +   | 3  | 2182 | 6.02 |
| LOC_Os04g20920.1 | H-BTB2 - Bric-a-Brac, Tramtrack, Broad Complex BTB domain with H family conserved sequence, | Chr4  | 11743893 | 11747126 + | 2  | 2138 | 6.02 |
| LOC_Os06g04520.1 | expressed protein                                                                           | Chr6  | 1937857  | 1948678 +  | 22 | 5888 | 6.02 |
| LOC_Os06g04520.2 | expressed protein                                                                           | Chr6  | 1937857  | 1948678 +  | 22 | 5839 | 6.02 |
| LOC_Os05g34240.1 | hAT dimerisation domain containing protein, expressed                                       | Chr5  | 20267699 | 20271147 - | 7  | 2821 | 6.02 |
| LOC_Os06g23800.2 | flavin-containing monooxygenase family protein, putative, expressed                         | Chr6  | 13905082 | 13909018 - | 7  | 1434 | 6.02 |
| LOC_Os09g26190.1 | CBS domain containing protein, expressed                                                    | Chr9  | 15790768 | 15800951 + | 12 | 2815 | 6.02 |
| LOC_Os06g09880.1 | EMB1270, putative, expressed                                                                | Chr6  | 5029395  | 5035358 -  | 4  | 4552 | 6.02 |
| LOC_Os08g06470.2 | transmembrane 9 superfamily member, putative, expressed                                     | Chr8  | 3630958  | 3635521 +  | 6  | 3094 | 6.02 |
| LOC_Os03g18940.1 | exonuclease, putative, expressed                                                            | Chr3  | 10606874 | 10612264 + | 4  | 1831 | 6.02 |
| LOC_Os05g50200.1 | expressed protein                                                                           | Chr5  | 28767046 | 28774104 - | 15 | 2413 | 6.02 |
| LOC_Os01g56320.1 | OsSub4 - Putative Subtilisin homologue, expressed                                           | Chr1  | 32450869 | 32456576 + | 10 | 3534 | 6.02 |
| LOC_Os06g38930.1 | leucine-rich repeat receptor protein kinase EXS precursor, putative, expressed              | Chr6  | 23094018 | 23097524 + | 2  | 3478 | 6.02 |
| LOC_Os06g06014.4 | expressed protein                                                                           | Chr6  | 2766128  | 2770398 -  | 5  | 1429 | 6.02 |
| LOC_Os01g65460.2 | beta-galactosidase precursor, putative, expressed                                           | Chr1  | 37994513 | 38001584 + | 19 | 4395 | 6.02 |
| LOC_Os04g56405.1 | expressed protein                                                                           | Chr4  | 33631690 | 33634831 - | 4  | 2760 | 6.02 |
| LOC_Os06g48960.1 | AIG2-like family domain containing protein, expressed                                       | Chr6  | 29665219 | 29667372 - | 5  | 1154 | 6.03 |
| LOC_Os11g23790.2 | expressed protein                                                                           | Chr11 | 13460587 | 13466808 - | 10 | 2105 | 6.03 |
| LOC_Os07g07270.2 | MBTB13 - Bric-a-Brac, Tramtrack, Broad Complex BTB domain with Meprin and TRAF Homology I   | Chr7  | 3610786  | 3614403 -  | 4  | 1876 | 6.03 |
| LOC_Os01g59320.1 | expressed protein                                                                           | Chr1  | 34293077 | 34295574 - | 4  | 1502 | 6.03 |
| LOC_Os10g25660.1 | OsFBX385 - F-box domain containing protein, expressed                                       | Chr10 | 13284009 | 13285673 - | 1  | 1697 | 6.03 |
| LOC_Os08g30820.1 | cleavage and polyadenylation specificity factor subunit 5, putative, expressed              | Chr8  | 19031135 | 19033307 - | 6  | 1762 | 6.03 |
| LOC_Os02g07250.1 | peptidase, cysteine peptidase active site, putative, expressed                              | Chr2  | 3720874  | 3724570 -  | 7  | 1803 | 6.03 |
| LOC_Os02g09820.1 | zinc finger, C3HC4 type domain containing protein, expressed                                | Chr2  | 5063137  | 5066805 +  | 2  | 2670 | 6.03 |
| LOC_Os01g11550.1 | TCP family transcription factor, putative, expressed                                        | Chr1  | 6221636  | 6224329 -  | 3  | 2569 | 6.03 |
| LOC_Os10g13800.2 | ufm1-conjugating enzyme 1, putative, expressed                                              | Chr10 | 7496071  | 7496943 +  | 2  | 831  | 6.03 |
| LOC_Os07g31840.1 | leucine-rich repeat family protein, putative, expressed                                     | Chr7  | 18914944 | 18920560 - | 9  | 2846 | 6.03 |
| LOC_Os01g01350.1 | SNF7 domain containing protein, putative, expressed                                         | Chr1  | 170712   | 173191 -   | 7  | 1375 | 6.03 |
| LOC_Os02g56910.1 | lecithine cholesterol acyltransferase, putative, expressed                                  | Chr2  | 34882827 | 34888422 - | 14 | 2167 | 6.04 |
| LOC_Os05g34240.2 | hAT dimerisation domain containing protein, expressed                                       | Chr5  | 20267699 | 20271119 - | 5  | 2909 | 6.04 |
| LOC_Os05g34240.3 | hAT dimerisation domain containing protein, expressed                                       | Chr5  | 20267699 | 20271147 - | 6  | 2888 | 6.04 |
| LOC_Os01g01350.2 | SNF7 domain containing protein, putative, expressed                                         | Chr1  | 170712   | 173434 -   | 5  | 1734 | 6.04 |
| LOC_Os05g49680.1 | OsFBX178 - F-box domain containing protein, expressed                                       | Chr5  | 28489736 | 28493856 - | 5  | 2207 | 6.04 |
| LOC_Os07g19460.1 | mitochondrial carrier protein, putative, expressed                                          | Chr7  | 11505604 | 11509628 - | 12 | 1850 | 6.04 |

|                  |                                                                                                |       |          |            |    |      |      |
|------------------|------------------------------------------------------------------------------------------------|-------|----------|------------|----|------|------|
| LOC_Os06g49510.2 | zinc knuckle family protein, putative, expressed                                               | Chr6  | 29990034 | 29992228 - | 3  | 1771 | 6.04 |
| LOC_Os03g62260.1 | FAD binding domain containing protein, expressed                                               | Chr3  | 35259267 | 35264558 - | 10 | 2457 | 6.04 |
| LOC_Os08g44930.1 | SNARE domain containing protein, putative, expressed                                           | Chr8  | 28208750 | 28211676 - | 5  | 850  | 6.04 |
| LOC_Os10g18070.1 | expressed protein                                                                              | Chr10 | 9158360  | 9164822 +  | 4  | 1798 | 6.04 |
| LOC_Os02g30974.1 | expressed protein                                                                              | Chr2  | 18501203 | 18509632 - | 12 | 2960 | 6.04 |
| LOC_Os03g47610.6 | thiamine biosynthesis protein thiC, putative, expressed                                        | Chr3  | 26952048 | 26959200 + | 7  | 3763 | 6.04 |
| LOC_Os03g47610.5 | thiamine biosynthesis protein thiC, putative, expressed                                        | Chr3  | 26952048 | 26959200 + | 7  | 3760 | 6.04 |
| LOC_Os03g47610.3 | thiamine biosynthesis protein thiC, putative, expressed                                        | Chr3  | 26952048 | 26959200 + | 7  | 3745 | 6.04 |
| LOC_Os03g47610.2 | thiamine biosynthesis protein thiC, putative, expressed                                        | Chr3  | 26952048 | 26959200 + | 7  | 3717 | 6.04 |
| LOC_Os03g47610.4 | thiamine biosynthesis protein thiC, putative, expressed                                        | Chr3  | 26952048 | 26959200 + | 7  | 3714 | 6.04 |
| LOC_Os03g12290.1 | glutamine synthetase, catalytic domain containing protein, expressed                           | Chr3  | 6457910  | 6462727 -  | 11 | 2386 | 6.04 |
| LOC_Os01g62610.1 | peptidyl-prolyl cis-trans isomerase, FKBP-type, putative, expressed                            | Chr1  | 36253547 | 36256977 + | 8  | 1583 | 6.04 |
| LOC_Os05g46430.1 | 60S ribosomal protein L28-1, putative, expressed                                               | Chr5  | 26901983 | 26905011 - | 4  | 926  | 6.04 |
| LOC_Os01g67180.1 | ribonuclease T2 family domain containing protein, expressed                                    | Chr1  | 38990769 | 38993804 - | 8  | 1702 | 6.05 |
| LOC_Os03g12140.3 | glucan endo-1,3-beta-glucosidase precursor, putative, expressed                                | Chr3  | 6371551  | 6373705 +  | 3  | 2062 | 6.05 |
| LOC_Os03g12140.2 | glucan endo-1,3-beta-glucosidase precursor, putative, expressed                                | Chr3  | 6371362  | 6373705 +  | 4  | 2072 | 6.05 |
| LOC_Os03g12140.1 | glucan endo-1,3-beta-glucosidase precursor, putative, expressed                                | Chr3  | 6369445  | 6373705 +  | 4  | 2218 | 6.05 |
| LOC_Os08g31340.1 | heavy metal-associated domain containing protein, expressed                                    | Chr8  | 19382952 | 19387137 + | 3  | 1729 | 6.05 |
| LOC_Os01g26370.2 | expressed protein                                                                              | Chr1  | 14955700 | 14959369 + | 5  | 2030 | 6.05 |
| LOC_Os08g02680.1 | expressed protein                                                                              | Chr8  | 1116925  | 1119641 -  | 3  | 1334 | 6.05 |
| LOC_Os12g10540.1 | OsMADS13 - MADS-box family gene with MIKCC type-box, expressed                                 | Chr12 | 5585203  | 5590285 +  | 8  | 1464 | 6.05 |
| LOC_Os06g03750.1 | dehydration response related protein, putative, expressed                                      | Chr6  | 1478931  | 1485780 +  | 6  | 2792 | 6.05 |
| LOC_Os08g44930.2 | SNARE domain containing protein, putative, expressed                                           | Chr8  | 28208750 | 28211676 - | 4  | 885  | 6.05 |
| LOC_Os09g31031.1 | ubiquitin family protein, putative, expressed                                                  | Chr9  | 18669317 | 18671727 + | 4  | 930  | 6.05 |
| LOC_Os09g31031.2 | ubiquitin family protein, putative, expressed                                                  | Chr9  | 18669317 | 18671727 + | 4  | 941  | 6.05 |
| LOC_Os04g31210.4 | bile acid sodium symporter family protein, putative, expressed                                 | Chr4  | 18675970 | 18681077 + | 8  | 2219 | 6.05 |
| LOC_Os05g28860.1 | 3%27-5%27 exonuclease, putative, expressed                                                     | Chr5  | 16918923 | 16925020 + | 11 | 2565 | 6.05 |
| LOC_Os05g51110.1 | expressed protein                                                                              | Chr5  | 29317524 | 29324891 - | 17 | 3710 | 6.05 |
| LOC_Os05g40200.1 | inactive receptor kinase At2g26730 precursor, putative, expressed                              | Chr5  | 23605419 | 23611006 - | 3  | 2966 | 6.05 |
| LOC_Os03g44560.1 | expp1 protein precursor, putative, expressed                                                   | Chr3  | 25092952 | 25096890 - | 3  | 1324 | 6.05 |
| LOC_Os02g25060.1 | NTMC2Type1.2 protein, putative, expressed                                                      | Chr2  | 14529662 | 14537548 - | 12 | 2491 | 6.05 |
| LOC_Os11g41410.1 | expressed protein                                                                              | Chr11 | 24847412 | 24853971 - | 4  | 1608 | 6.05 |
| LOC_Os05g32390.1 | FZL, putative, expressed                                                                       | Chr5  | 18891981 | 18900862 + | 11 | 3477 | 6.05 |
| LOC_Os04g48820.2 | deoxyribonuclease tatD, putative, expressed                                                    | Chr4  | 29114943 | 29119666 - | 9  | 1770 | 6.05 |
| LOC_Os09g28890.2 | transposon protein, putative, CACTA, En/Spm sub-class, expressed                               | Chr9  | 17556974 | 17558591 + | 2  | 1592 | 6.05 |
| LOC_Os11g23790.1 | expressed protein                                                                              | Chr11 | 13460527 | 13466808 - | 9  | 2238 | 6.05 |
| LOC_Os11g23790.3 | expressed protein                                                                              | Chr11 | 13460527 | 13466808 - | 9  | 2231 | 6.05 |
| LOC_Os06g47210.1 | oligopeptidase, putative, expressed                                                            | Chr6  | 28620993 | 28628006 + | 17 | 3271 | 6.05 |
| LOC_Os12g41350.2 | meiotic asynaptic mutant 1, putative, expressed                                                | Chr12 | 25622669 | 25628255 + | 13 | 2772 | 6.06 |
| LOC_Os09g09470.2 | WD domain, G-beta repeat domain containing protein, expressed                                  | Chr9  | 5094691  | 5102635 +  | 9  | 3162 | 6.06 |
| LOC_Os04g49490.2 | protein phosphatase 2C, putative, expressed                                                    | Chr4  | 29515047 | 29518435 - | 5  | 2106 | 6.06 |
| LOC_Os03g53530.1 | WD domain, G-beta repeat domain containing protein, expressed                                  | Chr3  | 30701238 | 30704661 - | 10 | 2038 | 6.06 |
| LOC_Os01g63460.1 | MYB family transcription factor, putative, expressed                                           | Chr1  | 36763179 | 36765294 - | 2  | 2064 | 6.06 |
| LOC_Os10g40020.2 | oxidoreductase, short chain dehydrogenase/reductase family domain containing family, expressed | Chr10 | 21434984 | 21439378 - | 10 | 2359 | 6.06 |
| LOC_Os04g55570.1 | plant protein of unknown function DUF869 domain containing protein, expressed                  | Chr4  | 33080889 | 33086419 + | 6  | 3345 | 6.06 |

|                  |                                                                              |       |          |            |    |      |      |
|------------------|------------------------------------------------------------------------------|-------|----------|------------|----|------|------|
| LOC_Os08g42620.2 | zinc finger DHHC domain-containing protein, putative, expressed              | Chr8  | 26938776 | 26942169 - | 7  | 2103 | 6.06 |
| LOC_Os08g42620.1 | zinc finger DHHC domain-containing protein, putative, expressed              | Chr8  | 26938776 | 26942169 - | 6  | 2175 | 6.06 |
| LOC_Os10g21460.1 | expressed protein                                                            | Chr10 | 10988248 | 10992677 + | 7  | 1736 | 6.06 |
| LOC_Os02g42374.2 | e2f-associated phosphoprotein, putative, expressed                           | Chr2  | 25491956 | 25494062 + | 4  | 858  | 6.06 |
| LOC_Os10g35480.2 | lanC-like protein 2, putative, expressed                                     | Chr10 | 18986705 | 18988982 + | 6  | 1789 | 6.06 |
| LOC_Os10g35480.1 | lanC-like protein 2, putative, expressed                                     | Chr10 | 18986705 | 18988982 + | 6  | 1795 | 6.06 |
| LOC_Os09g09470.1 | WD domain, G-beta repeat domain containing protein, expressed                | Chr9  | 5094691  | 5102650 +  | 10 | 3322 | 6.06 |
| LOC_Os03g47920.1 | expressed protein                                                            | Chr3  | 27235335 | 27239011 - | 4  | 1745 | 6.07 |
| LOC_Os01g67300.1 | expressed protein                                                            | Chr1  | 39063497 | 39065531 + | 6  | 1112 | 6.07 |
| LOC_Os05g25194.1 | metal cation transporter, putative, expressed                                | Chr5  | 14597766 | 14606210 - | 6  | 3405 | 6.07 |
| LOC_Os05g25194.2 | metal cation transporter, putative, expressed                                | Chr5  | 14597766 | 14606210 - | 5  | 3656 | 6.07 |
| LOC_Os10g25210.1 | OsFBX384 - F-box domain containing protein, expressed                        | Chr10 | 13015680 | 13017947 - | 2  | 2240 | 6.07 |
| LOC_Os08g28214.1 | tesmin/TSO1-like CXC domain containing protein, expressed                    | Chr8  | 17214129 | 17221240 - | 9  | 3015 | 6.07 |
| LOC_Os08g28214.6 | tesmin/TSO1-like CXC domain containing protein, expressed                    | Chr8  | 17214129 | 17221249 - | 9  | 3058 | 6.07 |
| LOC_Os06g51460.1 | white-brown complex homolog protein, putative, expressed                     | Chr6  | 31169637 | 31174837 - | 13 | 3911 | 6.07 |
| LOC_Os06g49320.1 | glycosyltransferase, putative, expressed                                     | Chr6  | 29882897 | 29886728 - | 2  | 3775 | 6.07 |
| LOC_Os01g65730.1 | SET domain containing protein, expressed                                     | Chr1  | 38157319 | 38159785 - | 6  | 1929 | 6.07 |
| LOC_Os11g07250.1 | receptor kinase, putative, expressed                                         | Chr11 | 3649576  | 3652796 +  | 3  | 3151 | 6.07 |
| LOC_Os08g28214.2 | tesmin/TSO1-like CXC domain containing protein, expressed                    | Chr8  | 17214129 | 17221240 - | 9  | 3034 | 6.07 |
| LOC_Os03g37580.4 | modifier of rudimentary protein, expressed                                   | Chr3  | 20842174 | 20846882 - | 7  | 1198 | 6.07 |
| LOC_Os08g38310.1 | expressed protein                                                            | Chr8  | 24263164 | 24269876 + | 9  | 4168 | 6.07 |
| LOC_Os05g39680.1 | PX domain containing protein, expressed                                      | Chr5  | 23287870 | 23297397 + | 13 | 4750 | 6.07 |
| LOC_Os01g68260.1 | lysine ketoglutarate reductase trans-splicing related 1, putative, expressed | Chr1  | 39666655 | 39670332 + | 14 | 1645 | 6.07 |
| LOC_Os03g45270.1 | CS domain containing protein, putative, expressed                            | Chr3  | 25558176 | 25560461 + | 5  | 625  | 6.07 |
| LOC_Os01g05490.1 | triosephosphate isomerase, cytosolic, putative, expressed                    | Chr1  | 2589537  | 2593641 -  | 9  | 1711 | 6.07 |
| LOC_Os01g05490.2 | triosephosphate isomerase, cytosolic, putative, expressed                    | Chr1  | 2589537  | 2593641 -  | 8  | 1808 | 6.07 |
| LOC_Os04g31210.5 | bile acid sodium symporter family protein, putative, expressed               | Chr4  | 18675970 | 18681077 + | 7  | 2004 | 6.08 |
| LOC_Os01g51700.3 | ras-related protein, putative, expressed                                     | Chr1  | 29730128 | 29735102 - | 6  | 1426 | 6.08 |
| LOC_Os06g51460.2 | white-brown complex homolog protein, putative, expressed                     | Chr6  | 31169684 | 31174867 - | 13 | 3899 | 6.08 |
| LOC_Os07g32950.1 | dnaj C terminal region family protein, expressed                             | Chr7  | 19692304 | 19695407 + | 6  | 1975 | 6.08 |
| LOC_Os08g31228.1 | ribosomal protein L27, putative, expressed                                   | Chr8  | 19307322 | 19311510 + | 4  | 1674 | 6.08 |
| LOC_Os03g61670.1 | calreticulin precursor, putative, expressed                                  | Chr3  | 34951952 | 34955910 - | 13 | 2448 | 6.08 |
| LOC_Os09g39550.1 | expressed protein                                                            | Chr9  | 22703362 | 22705713 + | 3  | 920  | 6.08 |
| LOC_Os01g43120.1 | DEAD/DEAH box helicase, putative, expressed                                  | Chr1  | 24598181 | 24601892 + | 10 | 2725 | 6.08 |
| LOC_Os09g25880.1 | expressed protein                                                            | Chr9  | 15521946 | 15523890 - | 3  | 1852 | 6.08 |
| LOC_Os01g66590.1 | DUF260 domain containing protein, putative, expressed                        | Chr1  | 38676217 | 38679707 + | 4  | 1683 | 6.08 |
| LOC_Os01g66590.2 | DUF260 domain containing protein, putative, expressed                        | Chr1  | 38676728 | 38679707 + | 3  | 1798 | 6.08 |
| LOC_Os05g43230.1 | oryzain alpha chain precursor, putative, expressed                           | Chr5  | 25153902 | 25157655 + | 6  | 2184 | 6.08 |
| LOC_Os01g66030.2 | OsMADS2 - MADS-box family gene with MIKc type-box, expressed                 | Chr1  | 38320785 | 38324074 - | 7  | 2006 | 6.08 |
| LOC_Os01g66030.1 | OsMADS2 - MADS-box family gene with MIKc type-box, expressed                 | Chr1  | 38320785 | 38324074 - | 7  | 2019 | 6.08 |
| LOC_Os12g33240.2 | mitochondrial ribosomal protein S10, putative, expressed                     | Chr12 | 20105721 | 20108020 + | 2  | 1081 | 6.08 |
| LOC_Os12g33240.3 | mitochondrial ribosomal protein S10, putative, expressed                     | Chr12 | 20105721 | 20108020 + | 2  | 1096 | 6.08 |
| LOC_Os03g50220.1 | homologous-pairing protein meu13, putative, expressed                        | Chr3  | 28632554 | 28636276 - | 6  | 1974 | 6.08 |
| LOC_Os01g19490.1 | pentatricopeptide, putative, expressed                                       | Chr1  | 11064694 | 11068774 - | 2  | 2442 | 6.08 |
| LOC_Os05g33010.2 | heat shock protein DnaJ, putative, expressed                                 | Chr5  | 19353553 | 19357897 + | 6  | 1228 | 6.08 |

|                  |                                                                          |       |          |            |    |      |      |
|------------------|--------------------------------------------------------------------------|-------|----------|------------|----|------|------|
| LOC_Os05g33010.1 | heat shock protein DnaJ, putative, expressed                             | Chr5  | 19353553 | 19357897 + | 6  | 1237 | 6.08 |
| LOC_Os02g51480.1 | PPR repeat domain containing protein, putative, expressed                | Chr2  | 31529599 | 31531859 + | 2  | 1997 | 6.09 |
| LOC_Os10g35440.1 | pentatricopeptide repeat domain containing protein, putative, expressed  | Chr10 | 18951471 | 18953729 + | 1  | 2291 | 6.09 |
| LOC_Os03g57750.2 | expressed protein                                                        | Chr3  | 32909844 | 32910753 + | 2  | 796  | 6.09 |
| LOC_Os03g57750.1 | expressed protein                                                        | Chr3  | 32909844 | 32910753 + | 1  | 942  | 6.09 |
| LOC_Os07g06890.1 | FAD-linked oxidoreductase protein, putative, expressed                   | Chr7  | 3363008  | 3370020 -  | 17 | 3336 | 6.09 |
| LOC_Os02g26370.1 | wiskott-Aldrich syndrome protein family member 2, putative, expressed    | Chr2  | 15482348 | 15485946 - | 3  | 1587 | 6.09 |
| LOC_Os03g34040.3 | ribosomal protein, putative, expressed                                   | Chr3  | 19412908 | 19417098 - | 3  | 1636 | 6.09 |
| LOC_Os08g39820.1 | pre-rRNA-processing protein TSR2, putative, expressed                    | Chr8  | 25206758 | 25210102 + | 4  | 1121 | 6.09 |
| LOC_Os08g39820.2 | pre-rRNA-processing protein TSR2, putative, expressed                    | Chr8  | 25206777 | 25210102 + | 4  | 1106 | 6.09 |
| LOC_Os01g08850.1 | expressed protein                                                        | Chr1  | 4444670  | 4448386 +  | 9  | 2080 | 6.09 |
| LOC_Os04g38930.1 | pentatricopeptide, putative, expressed                                   | Chr4  | 23131673 | 23133502 + | 1  | 1862 | 6.09 |
| LOC_Os12g41350.1 | meiotic asynaptic mutant 1, putative, expressed                          | Chr12 | 25622843 | 25628255 + | 13 | 2631 | 6.09 |
| LOC_Os06g05350.1 | whirly transcription factor domain containing protein, expressed         | Chr6  | 2405409  | 2408752 +  | 6  | 1955 | 6.09 |
| LOC_Os10g11820.1 | expressed protein                                                        | Chr10 | 6552107  | 6555101 -  | 1  | 3027 | 6.09 |
| LOC_Os10g41180.1 | expressed protein                                                        | Chr10 | 22121786 | 22123969 - | 3  | 2016 | 6.09 |
| LOC_Os01g05130.1 | expressed protein                                                        | Chr1  | 2403270  | 2405982 +  | 5  | 1187 | 6.09 |
| LOC_Os12g16524.1 | glutaredoxin-C8 precursor, putative, expressed                           | Chr12 | 9466243  | 9468318 +  | 1  | 2108 | 6.09 |
| LOC_Os08g43300.1 | UBX domain-containing protein, putative, expressed                       | Chr8  | 27365105 | 27370831 - | 11 | 2533 | 6.09 |
| LOC_Os02g42374.5 | e2f-associated phosphoprotein, putative, expressed                       | Chr2  | 25491955 | 25494117 + | 2  | 785  | 6.10 |
| LOC_Os04g28280.1 | BEE 3, putative, expressed                                               | Chr4  | 16732393 | 16734806 - | 7  | 1016 | 6.10 |
| LOC_Os01g32849.1 | expressed protein                                                        | Chr1  | 18026504 | 18030389 - | 4  | 3300 | 6.10 |
| LOC_Os03g37580.3 | modifier of rudimentary protein, expressed                               | Chr3  | 20842174 | 20846882 - | 8  | 1443 | 6.10 |
| LOC_Os03g37580.1 | modifier of rudimentary protein, expressed                               | Chr3  | 20842174 | 20846882 - | 8  | 1446 | 6.10 |
| LOC_Os03g37580.2 | modifier of rudimentary protein, expressed                               | Chr3  | 20842174 | 20846882 - | 9  | 1523 | 6.10 |
| LOC_Os06g06400.1 | NBS-LRR type disease resistance protein, putative, expressed             | Chr6  | 2985094  | 2990867 -  | 3  | 5081 | 6.10 |
| LOC_Os08g02950.1 | expressed protein                                                        | Chr8  | 1283100  | 1286546 -  | 7  | 2022 | 6.10 |
| LOC_Os08g40580.3 | methyltransferase domain containing protein, expressed                   | Chr8  | 25687620 | 25690627 - | 9  | 1316 | 6.10 |
| LOC_Os01g62870.1 | oxidoreductase, aldo/keto reductase family protein, putative, expressed  | Chr1  | 36410638 | 36414610 + | 7  | 1736 | 6.10 |
| LOC_Os06g43270.1 | protein kinase domain containing protein, expressed                      | Chr6  | 26003181 | 26007060 + | 5  | 2673 | 6.10 |
| LOC_Os05g01750.1 | TruB family pseudouridylate synthase, putative, expressed                | Chr5  | 448732   | 453210 -   | 9  | 2275 | 6.10 |
| LOC_Os03g46460.1 | ubiquitin carboxyl-terminal hydrolase, family 1, putative, expressed     | Chr3  | 26283114 | 26287177 + | 2  | 3738 | 6.10 |
| LOC_Os12g09089.1 | protein kinase PKN/PRK1, effector, putative, expressed                   | Chr12 | 4748030  | 4760875 -  | 6  | 1956 | 6.10 |
| LOC_Os06g27800.2 | tm-1GCR237 protein, putative, expressed                                  | Chr6  | 15738394 | 15744794 + | 10 | 2874 | 6.10 |
| LOC_Os01g49154.1 | expressed protein                                                        | Chr1  | 28246607 | 28248021 + | 1  | 1447 | 6.11 |
| LOC_Os03g59480.1 | expressed protein                                                        | Chr3  | 33849980 | 33854736 - | 12 | 3164 | 6.11 |
| LOC_Os03g11050.3 | mannose-1-phosphate guanyltransferase, putative, expressed               | Chr3  | 5680647  | 5685367 -  | 15 | 2224 | 6.11 |
| LOC_Os05g45740.1 | mitochondrial ATP synthase g subunit family protein, putative, expressed | Chr5  | 26497701 | 26499634 + | 3  | 797  | 6.11 |
| LOC_Os05g45740.2 | mitochondrial ATP synthase g subunit family protein, putative, expressed | Chr5  | 26497701 | 26499634 + | 2  | 883  | 6.11 |
| LOC_Os03g06760.2 | exocyst complex component 6, putative, expressed                         | Chr3  | 3435024  | 3439544 +  | 1  | 4553 | 6.11 |
| LOC_Os05g51000.3 | expressed protein                                                        | Chr5  | 29271238 | 29273974 - | 3  | 1697 | 6.11 |
| LOC_Os05g51000.4 | expressed protein                                                        | Chr5  | 29271238 | 29273972 - | 2  | 1746 | 6.11 |
| LOC_Os05g51000.2 | expressed protein                                                        | Chr5  | 29271238 | 29274792 - | 4  | 1762 | 6.11 |
| LOC_Os05g51000.1 | expressed protein                                                        | Chr5  | 29271238 | 29274798 - | 4  | 1862 | 6.11 |
| LOC_Os07g48970.1 | OsPOP17 - Putative Prolyl Oligopeptidase homologue, expressed            | Chr7  | 29303741 | 29307647 + | 10 | 2607 | 6.11 |

|                  |                                                                         |       |          |            |    |      |      |
|------------------|-------------------------------------------------------------------------|-------|----------|------------|----|------|------|
| LOC_Os02g17650.2 | tocopherol cyclase, chloroplast precursor, putative, expressed          | Chr2  | 10155843 | 10164747 - | 9  | 2209 | 6.11 |
| LOC_Os12g44160.3 | oxidoreductase, putative, expressed                                     | Chr12 | 27394751 | 27398395 + | 12 | 1555 | 6.11 |
| LOC_Os12g44160.2 | oxidoreductase, putative, expressed                                     | Chr12 | 27394751 | 27398395 + | 12 | 1566 | 6.11 |
| LOC_Os12g44160.1 | oxidoreductase, putative, expressed                                     | Chr12 | 27394407 | 27398395 + | 13 | 1824 | 6.11 |
| LOC_Os05g35730.2 | hydrolase, alpha/beta fold family domain containing protein, expressed  | Chr5  | 21207906 | 21214431 - | 11 | 1882 | 6.11 |
| LOC_Os02g55050.2 | OsFBX64 - F-box domain containing protein, expressed                    | Chr2  | 33722143 | 33724854 - | 5  | 2137 | 6.11 |
| LOC_Os04g52440.1 | aminotransferase, putative, expressed                                   | Chr4  | 31169012 | 31174731 + | 19 | 2513 | 6.11 |
| LOC_Os07g22950.2 | adenylate kinase isoenzyme 6, putative, expressed                       | Chr7  | 12926448 | 12930711 + | 4  | 1046 | 6.11 |
| LOC_Os08g02370.1 | galactosyltransferase family protein, putative, expressed               | Chr8  | 940837   | 944407 -   | 11 | 1881 | 6.11 |
| LOC_Os03g11050.1 | mannose-1-phosphate guanylyltransferase, putative, expressed            | Chr3  | 5680647  | 5685409 -  | 15 | 2276 | 6.12 |
| LOC_Os02g28900.1 | cytokinin-O-glucosyltransferase 2, putative, expressed                  | Chr2  | 17118767 | 17120699 + | 2  | 1905 | 6.12 |
| LOC_Os02g53140.1 | COP1, putative, expressed                                               | Chr2  | 32528037 | 32533583 - | 13 | 3126 | 6.12 |
| LOC_Os04g47860.7 | ZOS4-11 - C2H2 zinc finger protein, expressed                           | Chr4  | 28408664 | 28410885 + | 2  | 1705 | 6.12 |
| LOC_Os07g38100.1 | HVA22, putative, expressed                                              | Chr7  | 22845333 | 22849592 - | 8  | 841  | 6.12 |
| LOC_Os03g50450.1 | inactive receptor kinase At2g26730 precursor, putative, expressed       | Chr3  | 28795423 | 28799255 - | 2  | 3160 | 6.12 |
| LOC_Os07g46410.1 | bifunctional thioredoxin reductase/thioredoxin, putative, expressed     | Chr7  | 27694622 | 27699164 + | 10 | 2200 | 6.12 |
| LOC_Os01g51754.4 | alpha-amylase precursor, putative, expressed                            | Chr1  | 29760719 | 29763942 + | 6  | 1662 | 6.12 |
| LOC_Os10g30090.1 | amino acid permease, putative, expressed                                | Chr10 | 15629313 | 15635900 - | 14 | 2851 | 6.12 |
| LOC_Os02g42220.1 | transposon protein, putative, unclassified, expressed                   | Chr2  | 25399803 | 25404333 + | 6  | 2848 | 6.12 |
| LOC_Os03g07290.1 | structural constituent of ribosome, putative, expressed                 | Chr3  | 3711106  | 3713272 +  | 3  | 815  | 6.12 |
| LOC_Os01g48720.1 | RNA polymerase III subunit RPC82 family protein, putative, expressed    | Chr1  | 27938768 | 27947047 + | 14 | 2364 | 6.12 |
| LOC_Os07g22950.3 | adenylate kinase isoenzyme 6, putative, expressed                       | Chr7  | 12926448 | 12930711 + | 3  | 1040 | 6.12 |
| LOC_Os07g22950.1 | adenylate kinase isoenzyme 6, putative, expressed                       | Chr7  | 12926466 | 12930711 + | 3  | 1074 | 6.12 |
| LOC_Os02g10670.1 | expressed protein                                                       | Chr2  | 5617300  | 5619951 +  | 6  | 1398 | 6.12 |
| LOC_Os03g52320.1 | GRF-interacting factor 1, putative, expressed                           | Chr3  | 30045079 | 30048795 - | 4  | 1484 | 6.12 |
| LOC_Os02g37834.6 | expressed protein                                                       | Chr2  | 22835850 | 22836993 + | 2  | 840  | 6.12 |
| LOC_Os06g08180.1 | expressed protein                                                       | Chr6  | 3966030  | 3969599 -  | 8  | 2018 | 6.13 |
| LOC_Os04g31210.1 | bile acid sodium symporter family protein, putative, expressed          | Chr4  | 18675970 | 18681077 + | 9  | 2196 | 6.13 |
| LOC_Os04g31210.3 | bile acid sodium symporter family protein, putative, expressed          | Chr4  | 18675930 | 18681077 + | 8  | 2278 | 6.13 |
| LOC_Os02g17680.1 | ethylene-responsive protein related, putative, expressed                | Chr2  | 10181426 | 10189201 - | 9  | 2410 | 6.13 |
| LOC_Os08g34170.1 | CAF1 family ribonuclease containing protein, putative, expressed        | Chr8  | 21418716 | 21421093 + | 1  | 2410 | 6.13 |
| LOC_Os02g33500.1 | threonyl-tRNA synthetase, putative, expressed                           | Chr2  | 19924354 | 19928340 - | 8  | 2591 | 6.13 |
| LOC_Os01g33762.1 | expressed protein                                                       | Chr1  | 18585545 | 18587695 + | 5  | 619  | 6.13 |
| LOC_Os12g21789.3 | expressed protein                                                       | Chr12 | 12264653 | 12267520 - | 3  | 1379 | 6.13 |
| LOC_Os03g53880.2 | serine/threonine-protein kinase TOUSLED, putative, expressed            | Chr3  | 30890100 | 30899911 - | 17 | 3644 | 6.13 |
| LOC_Os03g53880.1 | serine/threonine-protein kinase TOUSLED, putative, expressed            | Chr3  | 30890100 | 30899909 - | 16 | 3483 | 6.13 |
| LOC_Os06g19640.1 | 39S ribosomal protein L46, mitochondrial precursor, putative, expressed | Chr6  | 11204783 | 11208079 - | 6  | 1346 | 6.13 |
| LOC_Os06g27800.1 | tm-1GCR237 protein, putative, expressed                                 | Chr6  | 15738385 | 15744846 + | 9  | 2935 | 6.13 |
| LOC_Os01g56620.1 | pseudouridylate synthase, putative, expressed                           | Chr1  | 32660700 | 32667425 - | 19 | 3262 | 6.13 |
| LOC_Os01g50310.1 | VIP1 protein, putative, expressed                                       | Chr1  | 28881393 | 28882954 - | 1  | 1594 | 6.13 |
| LOC_Os07g44640.1 | ZOS7-13 - C2H2 zinc finger protein, expressed                           | Chr7  | 26633873 | 26637243 + | 7  | 2513 | 6.13 |
| LOC_Os11g38170.2 | notchless protein, putative, expressed                                  | Chr11 | 22630975 | 22637797 + | 14 | 2572 | 6.14 |
| LOC_Os11g38170.1 | notchless protein, putative, expressed                                  | Chr11 | 22630975 | 22637804 + | 14 | 2588 | 6.14 |
| LOC_Os02g55050.1 | OsFBX64 - F-box domain containing protein, expressed                    | Chr2  | 33722143 | 33724854 - | 6  | 2279 | 6.14 |
| LOC_Os01g29469.1 | dual specificity protein phosphatase, putative, expressed               | Chr1  | 16511526 | 16518660 - | 5  | 1153 | 6.14 |

|                  |                                                                           |       |          |            |    |      |      |
|------------------|---------------------------------------------------------------------------|-------|----------|------------|----|------|------|
| LOC_Os01g12540.1 | GTPase of unknown function domain containing protein, putative, expressed | Chr1  | 6897571  | 6904232 +  | 9  | 2636 | 6.14 |
| LOC_Os01g42720.2 | expressed protein                                                         | Chr1  | 24300144 | 24301232 + | 3  | 961  | 6.14 |
| LOC_Os11g01420.1 | ribosomal protein L10, putative, expressed                                | Chr11 | 252426   | 254919 -   | 8  | 1394 | 6.14 |
| LOC_Os08g06500.1 | PPR repeat domain containing protein, putative, expressed                 | Chr8  | 3680925  | 3688728 +  | 4  | 4744 | 6.14 |
| LOC_Os08g30900.2 | YDG/SRA domain containing protein, expressed                              | Chr8  | 19071029 | 19076379 + | 5  | 4088 | 6.14 |
| LOC_Os08g30900.1 | YDG/SRA domain containing protein, expressed                              | Chr8  | 19070540 | 19076379 + | 4  | 4634 | 6.14 |
| LOC_Os04g17660.3 | rhodanese-like domain containing protein, putative, expressed             | Chr4  | 9671229  | 9674123 -  | 4  | 2258 | 6.14 |
| LOC_Os01g66170.1 | SNARE associated Golgi protein, putative, expressed                       | Chr1  | 38436842 | 38440460 - | 7  | 1866 | 6.14 |
| LOC_Os03g16580.1 | expressed protein                                                         | Chr3  | 9138551  | 9143660 +  | 3  | 1368 | 6.14 |
| LOC_Os02g16650.1 | PPR repeat domain containing protein, putative, expressed                 | Chr2  | 9510002  | 9514048 +  | 3  | 3086 | 6.14 |
| LOC_Os05g24970.2 | LSM domain containing protein, expressed                                  | Chr5  | 14449503 | 14452311 - | 4  | 1130 | 6.15 |
| LOC_Os05g24970.1 | LSM domain containing protein, expressed                                  | Chr5  | 14449503 | 14452183 - | 4  | 1005 | 6.15 |
| LOC_Os07g23244.1 | ribosomal protein L23 family protein, putative, expressed                 | Chr7  | 13098610 | 13103790 + | 2  | 1298 | 6.15 |
| LOC_Os07g08320.1 | RNA recognition motif containing protein, expressed                       | Chr7  | 4253896  | 4259355 -  | 9  | 2241 | 6.15 |
| LOC_Os11g34770.1 | maf, putative, expressed                                                  | Chr11 | 20372742 | 20376132 - | 9  | 1314 | 6.15 |
| LOC_Os05g01750.2 | TruB family pseudouridylate synthase, putative, expressed                 | Chr5  | 448732   | 453210 -   | 6  | 3312 | 6.15 |
| LOC_Os04g08450.1 | expressed protein                                                         | Chr4  | 4543617  | 4547432 +  | 7  | 1273 | 6.15 |
| LOC_Os01g47690.1 | metallo-beta-lactamase family protein, putative, expressed                | Chr1  | 27274676 | 27278560 - | 9  | 1847 | 6.15 |
| LOC_Os03g06120.2 | PLAC8 family protein, expressed                                           | Chr3  | 3068969  | 3074191 +  | 9  | 2401 | 6.15 |
| LOC_Os05g24970.3 | LSM domain containing protein, expressed                                  | Chr5  | 14449503 | 14452311 - | 3  | 1184 | 6.15 |
| LOC_Os01g68524.2 | pentatricopeptide, putative, expressed                                    | Chr1  | 39811722 | 39819555 - | 5  | 1293 | 6.15 |
| LOC_Os07g47250.3 | lipase precursor, putative, expressed                                     | Chr7  | 28240545 | 28245450 + | 11 | 2038 | 6.15 |
| LOC_Os01g35040.1 | ZOS1-09 - C2H2 zinc finger protein, expressed                             | Chr1  | 19389831 | 19392858 + | 3  | 2298 | 6.15 |
| LOC_Os02g57170.1 | expressed protein                                                         | Chr2  | 35011392 | 35013385 - | 4  | 874  | 6.16 |
| LOC_Os07g20544.2 | aspartokinase, chloroplast precursor, putative, expressed                 | Chr7  | 11865383 | 11874242 - | 13 | 2569 | 6.16 |
| LOC_Os07g20544.1 | aspartokinase, chloroplast precursor, putative, expressed                 | Chr7  | 11865383 | 11874242 - | 13 | 2575 | 6.16 |
| LOC_Os02g12900.2 | cysteine synthase, putative, expressed                                    | Chr2  | 6810648  | 6814112 +  | 7  | 2447 | 6.16 |
| LOC_Os02g12900.1 | cysteine synthase, putative, expressed                                    | Chr2  | 6810648  | 6814112 +  | 7  | 2508 | 6.16 |
| LOC_Os08g33350.1 | expressed protein                                                         | Chr8  | 20802476 | 20805200 - | 8  | 1398 | 6.16 |
| LOC_Os03g51000.3 | 3,4-dihydroxy-2-butanone kinase, putative, expressed                      | Chr3  | 29137663 | 29145550 - | 18 | 2614 | 6.16 |
| LOC_Os07g48850.1 | PPR repeat containing protein, expressed                                  | Chr7  | 29227754 | 29232888 - | 3  | 4648 | 6.16 |
| LOC_Os02g45490.3 | expressed protein                                                         | Chr2  | 27667909 | 27671421 - | 4  | 3044 | 6.16 |
| LOC_Os01g60790.1 | 40S ribosomal protein S26, putative, expressed                            | Chr1  | 35153694 | 35155904 + | 5  | 1015 | 6.16 |
| LOC_Os05g07130.1 | 6PF-2-K/Fru-2,6-P2ASE liver isozyme, putative, expressed                  | Chr5  | 3763113  | 3771463 +  | 23 | 3402 | 6.16 |
| LOC_Os05g07130.2 | 6PF-2-K/Fru-2,6-P2ASE liver isozyme, putative, expressed                  | Chr5  | 3763113  | 3771463 +  | 23 | 3399 | 6.16 |
| LOC_Os08g11220.3 | expressed protein                                                         | Chr8  | 6598207  | 6603406 +  | 5  | 1203 | 6.16 |
| LOC_Os03g57090.1 | arv1, putative, expressed                                                 | Chr3  | 32550896 | 32554338 - | 10 | 1725 | 6.16 |
| LOC_Os05g08400.1 | zinc finger C-x8-C-x5-C-x3-H type family protein, expressed               | Chr5  | 4581331  | 4584038 -  | 3  | 1884 | 6.17 |
| LOC_Os04g08450.2 | expressed protein                                                         | Chr4  | 4543617  | 4547560 +  | 7  | 1419 | 6.17 |
| LOC_Os08g39210.1 | OsWAK74 - OsWAK receptor-like protein kinase, expressed                   | Chr8  | 24767343 | 24770890 - | 2  | 2386 | 6.17 |
| LOC_Os05g14980.1 | expressed protein                                                         | Chr5  | 8499893  | 8504665 +  | 4  | 2430 | 6.17 |
| LOC_Os03g06120.1 | PLAC8 family protein, expressed                                           | Chr3  | 3068969  | 3074123 +  | 8  | 2457 | 6.17 |
| LOC_Os03g06120.3 | PLAC8 family protein, expressed                                           | Chr3  | 3068969  | 3074123 +  | 8  | 2452 | 6.17 |
| LOC_Os09g02729.2 | phospholipase C, putative, expressed                                      | Chr9  | 1226547  | 1238533 -  | 7  | 1791 | 6.17 |
| LOC_Os08g15030.1 | aspartate carbamoyltransferase, putative, expressed                       | Chr8  | 9071639  | 9075883 -  | 5  | 1591 | 6.17 |

|                  |                                                                                             |       |          |          |   |    |      |      |
|------------------|---------------------------------------------------------------------------------------------|-------|----------|----------|---|----|------|------|
| LOC_Os03g56820.1 | fatty acid hydroxylase, putative, expressed                                                 | Chr3  | 32376731 | 32378468 | + | 6  | 1280 | 6.17 |
| LOC_Os03g09860.2 | acetyltransferase, GNAT family, putative, expressed                                         | Chr3  | 4906203  | 4908795  | + | 6  | 1373 | 6.17 |
| LOC_Os05g36050.1 | serine/threonine-protein kinase, putative, expressed                                        | Chr5  | 21342183 | 21345370 | - | 7  | 2119 | 6.17 |
| LOC_Os03g55930.1 | ribosomal protein, putative, expressed                                                      | Chr3  | 31845364 | 31847238 | - | 2  | 1079 | 6.17 |
| LOC_Os01g60660.1 | methionyl-tRNA synthetase, putative, expressed                                              | Chr1  | 35069246 | 35074491 | - | 12 | 1925 | 6.17 |
| LOC_Os03g62870.3 | DNA-directed RNA polymerases I, II, and III subunit RPABC3, putative, expressed             | Chr3  | 35562754 | 35565063 | - | 5  | 1049 | 6.17 |
| LOC_Os04g08450.3 | expressed protein                                                                           | Chr4  | 4543617  | 4547560  | + | 7  | 1422 | 6.17 |
| LOC_Os09g29080.1 | expressed protein                                                                           | Chr9  | 17659697 | 17662227 | - | 5  | 1131 | 6.18 |
| LOC_Os06g07020.1 | ZOS6-01 - C2H2 zinc finger protein, expressed                                               | Chr6  | 3328474  | 3331568  | + | 2  | 1973 | 6.18 |
| LOC_Os08g11220.2 | expressed protein                                                                           | Chr8  | 6598207  | 6603406  | + | 5  | 1347 | 6.18 |
| LOC_Os04g46730.4 | thioesterase family protein, putative, expressed                                            | Chr4  | 27700855 | 27702773 | - | 5  | 1001 | 6.18 |
| LOC_Os01g62920.1 | homeodomain protein, putative, expressed                                                    | Chr1  | 36445019 | 36449951 | - | 4  | 3007 | 6.18 |
| LOC_Os01g50120.1 | expressed protein                                                                           | Chr1  | 28798874 | 28804461 | + | 6  | 3844 | 6.18 |
| LOC_Os03g62870.1 | DNA-directed RNA polymerases I, II, and III subunit RPABC3, putative, expressed             | Chr3  | 35562754 | 35565081 | - | 5  | 1037 | 6.18 |
| LOC_Os01g59920.1 | cysteine synthase, chloroplast precursor, putative, expressed                               | Chr1  | 34647037 | 34650771 | - | 10 | 2101 | 6.18 |
| LOC_Os10g05600.1 | thaumatin-like protein 1 precursor, putative, expressed                                     | Chr10 | 2794499  | 2796678  | - | 3  | 1784 | 6.18 |
| LOC_Os08g41560.1 | ubiquitin carboxyl-terminal hydrolase, putative, expressed                                  | Chr8  | 26253487 | 26256841 | - | 2  | 3146 | 6.18 |
| LOC_Os02g52900.3 | glutaredoxin 2, putative, expressed                                                         | Chr2  | 32349092 | 32352908 | + | 5  | 1732 | 6.18 |
| LOC_Os04g31971.1 | expressed protein                                                                           | Chr4  | 19148767 | 19152021 | + | 6  | 2028 | 6.18 |
| LOC_Os07g31720.1 | GTPase activating protein, putative, expressed                                              | Chr7  | 18840247 | 18842537 | + | 3  | 1052 | 6.18 |
| LOC_Os03g09860.1 | acetyltransferase, GNAT family, putative, expressed                                         | Chr3  | 4906203  | 4908795  | + | 6  | 1388 | 6.19 |
| LOC_Os01g53840.1 | protein kinase family protein, putative, expressed                                          | Chr1  | 30949378 | 30954738 | - | 11 | 2745 | 6.19 |
| LOC_Os12g43520.1 | cbbY protein-related, putative, expressed                                                   | Chr12 | 26997513 | 27001740 | - | 11 | 1806 | 6.19 |
| LOC_Os03g51550.2 | WD repeat-containing protein 5, putative, expressed                                         | Chr3  | 29486017 | 29490091 | + | 2  | 1694 | 6.19 |
| LOC_Os06g41810.1 | reductase, putative, expressed                                                              | Chr6  | 25073542 | 25076549 | - | 6  | 1506 | 6.19 |
| LOC_Os03g62870.2 | DNA-directed RNA polymerases I, II, and III subunit RPABC3, putative, expressed             | Chr3  | 35562754 | 35564991 | - | 4  | 1105 | 6.19 |
| LOC_Os01g52720.1 | Complex I intermediate-associated protein 30 domain containing protein, putative, expressed | Chr1  | 30320746 | 30323993 | + | 8  | 1351 | 6.19 |
| LOC_Os08g11220.1 | expressed protein                                                                           | Chr8  | 6598207  | 6603406  | + | 4  | 1614 | 6.19 |
| LOC_Os11g48020.1 | fatty acid hydroxylase, putative, expressed                                                 | Chr11 | 28953907 | 28957199 | - | 7  | 1518 | 6.19 |
| LOC_Os03g44540.1 | nuclear transcription factor Y subunit, putative, expressed                                 | Chr3  | 25069060 | 25074703 | - | 6  | 2380 | 6.19 |
| LOC_Os05g05280.1 | zinc finger family protein, putative, expressed                                             | Chr5  | 2598338  | 2604167  | - | 10 | 2165 | 6.19 |
| LOC_Os02g24642.1 | photosystem II reaction center protein K precursor, putative, expressed                     | Chr2  | 14288946 | 14289590 | - | 1  | 677  | 6.19 |
| LOC_Os02g42314.1 | ubiquitin-conjugating enzyme, putative, expressed                                           | Chr2  | 25450892 | 25454110 | - | 5  | 1623 | 6.19 |
| LOC_Os04g44030.1 | PPR repeat domain containing protein, putative, expressed                                   | Chr4  | 26090648 | 26093773 | + | 1  | 3158 | 6.19 |
| LOC_Os11g39360.1 | pentatricopeptide repeat domain containing protein, putative, expressed                     | Chr11 | 23427261 | 23429925 | + | 3  | 2513 | 6.19 |
| LOC_Os07g32412.2 | transposon protein, putative, unclassified, expressed                                       | Chr7  | 19276479 | 19281526 | - | 6  | 2527 | 6.19 |
| LOC_Os12g30610.1 | expressed protein                                                                           | Chr12 | 18383645 | 18385743 | + | 1  | 2131 | 6.20 |
| LOC_Os02g52270.2 | heat shock protein DnaJ, putative, expressed                                                | Chr2  | 32001646 | 32003185 | - | 3  | 717  | 6.20 |
| LOC_Os05g32850.1 | CBS domain containing protein, expressed                                                    | Chr5  | 19232846 | 19240430 | + | 13 | 2426 | 6.20 |
| LOC_Os11g41540.4 | disease resistance RPP8-like protein 3, putative, expressed                                 | Chr11 | 24911501 | 24917044 | + | 5  | 3352 | 6.20 |
| LOC_Os11g41540.3 | disease resistance RPP8-like protein 3, putative, expressed                                 | Chr11 | 24911501 | 24917044 | + | 5  | 3379 | 6.20 |
| LOC_Os08g05750.1 | pentatricopeptide, putative, expressed                                                      | Chr8  | 3079277  | 3084580  | - | 5  | 2951 | 6.20 |
| LOC_Os01g31690.2 | oxygen-evolving enhancer protein 1, chloroplast precursor, putative, expressed              | Chr1  | 17349311 | 17350816 | + | 3  | 1431 | 6.20 |
| LOC_Os01g31690.1 | oxygen-evolving enhancer protein 1, chloroplast precursor, putative, expressed              | Chr1  | 17349311 | 17350816 | + | 2  | 1453 | 6.20 |
| LOC_Os02g52900.1 | glutaredoxin 2, putative, expressed                                                         | Chr2  | 32349092 | 32352908 | + | 6  | 1934 | 6.20 |

|                  |                                                                               |       |          |            |    |      |      |
|------------------|-------------------------------------------------------------------------------|-------|----------|------------|----|------|------|
| LOC_Os07g07709.1 | ribosomal protein S13p/S18e, putative, expressed                              | Chr7  | 3872134  | 3875077 +  | 4  | 941  | 6.20 |
| LOC_Os03g53760.1 | ATP-dependent RNA helicase DHX36, putative, expressed                         | Chr3  | 30815600 | 30822590 - | 19 | 4574 | 6.20 |
| LOC_Os01g42800.1 | MEE18, putative, expressed                                                    | Chr1  | 24354151 | 24360484 - | 13 | 2101 | 6.20 |
| LOC_Os06g06610.1 | expressed protein                                                             | Chr6  | 3111535  | 3115194 +  | 3  | 2463 | 6.20 |
| LOC_Os11g18830.1 | survival motor neuron containing protein, expressed                           | Chr11 | 10691940 | 10698365 + | 4  | 1594 | 6.20 |
| LOC_Os08g14450.1 | RNA polymerase sigma factor, putative, expressed                              | Chr8  | 8677955  | 8681990 +  | 9  | 3074 | 6.20 |
| LOC_Os02g04924.1 | retrotransposon protein, putative, unclassified, expressed                    | Chr2  | 2277044  | 2279843 +  | 2  | 2685 | 6.20 |
| LOC_Os02g04924.2 | retrotransposon protein, putative, unclassified, expressed                    | Chr2  | 2277044  | 2279841 +  | 2  | 2689 | 6.20 |
| LOC_Os02g30650.2 | heavy metal-associated domain containing protein, expressed                   | Chr2  | 18252570 | 18256018 + | 5  | 1359 | 6.20 |
| LOC_Os11g05570.1 | RNASEH2A - Putative ribonuclease H2 large subunit, expressed                  | Chr11 | 2529744  | 2532695 +  | 8  | 1573 | 6.20 |
| LOC_Os05g07900.1 | mitochondrial carrier protein, putative, expressed                            | Chr5  | 4266371  | 4270255 +  | 4  | 2223 | 6.20 |
| LOC_Os05g07900.2 | mitochondrial carrier protein, putative, expressed                            | Chr5  | 4266371  | 4270238 +  | 4  | 2303 | 6.20 |
| LOC_Os02g51640.1 | expressed protein                                                             | Chr2  | 31622776 | 31627571 - | 5  | 1922 | 6.21 |
| LOC_Os01g15029.1 | expressed protein                                                             | Chr1  | 8444463  | 8447054 -  | 2  | 740  | 6.21 |
| LOC_Os11g34850.1 | maf, putative, expressed                                                      | Chr11 | 20420003 | 20424116 - | 9  | 1946 | 6.21 |
| LOC_Os05g35730.1 | hydrolase, alpha/beta fold family domain containing protein, expressed        | Chr5  | 21207906 | 21214431 - | 14 | 2470 | 6.21 |
| LOC_Os04g42610.1 | plant protein of unknown function DUF869 domain containing protein, expressed | Chr4  | 25207809 | 25213918 + | 4  | 2912 | 6.21 |
| LOC_Os02g02480.3 | basic helix-loop-helix DND-binding domain containing protein, expressed       | Chr2  | 874691   | 878615 -   | 6  | 1420 | 6.21 |
| LOC_Os11g39360.2 | pentatricopeptide repeat domain containing protein, putative, expressed       | Chr11 | 23427261 | 23429926 + | 2  | 2565 | 6.21 |
| LOC_Os04g53612.1 | APO, putative, expressed                                                      | Chr4  | 31959526 | 31961876 - | 3  | 1934 | 6.21 |
| LOC_Os01g12540.2 | GTPase of unknown function domain containing protein, putative, expressed     | Chr1  | 6897557  | 6904259 +  | 8  | 3592 | 6.21 |
| LOC_Os05g38984.1 | expressed protein                                                             | Chr5  | 22870780 | 22873243 + | 3  | 2082 | 6.21 |
| LOC_Os03g01550.1 | expressed protein                                                             | Chr3  | 348339   | 352329 -   | 2  | 3335 | 6.21 |
| LOC_Os01g16960.2 | pyruvate kinase, putative, expressed                                          | Chr1  | 9694027  | 9699700 -  | 3  | 2128 | 6.21 |
| LOC_Os02g45490.2 | expressed protein                                                             | Chr2  | 27667908 | 27671421 - | 3  | 3241 | 6.22 |
| LOC_Os12g08800.1 | las1-like family protein, putative, expressed                                 | Chr12 | 4527362  | 4532890 +  | 8  | 3744 | 6.22 |
| LOC_Os01g46840.1 | expressed protein                                                             | Chr1  | 26717834 | 26722446 + | 2  | 2949 | 6.22 |
| LOC_Os02g04800.1 | AIG2-like family domain containing protein, expressed                         | Chr2  | 2205767  | 2208213 +  | 5  | 1588 | 6.22 |
| LOC_Os04g57950.1 | dihydroorotate dihydrogenase protein, putative, expressed                     | Chr4  | 34519564 | 34523579 + | 11 | 2328 | 6.22 |
| LOC_Os05g41910.1 | expressed protein                                                             | Chr5  | 24541182 | 24544300 - | 3  | 2130 | 6.22 |
| LOC_Os11g01270.1 | mitochondrial substrate carrier family protein, putative, expressed           | Chr11 | 144165   | 149105 -   | 7  | 2884 | 6.22 |
| LOC_Os05g45080.1 | anthocyanidin 5,3-O-glucosyltransferase, putative, expressed                  | Chr5  | 26192929 | 26194777 + | 1  | 1881 | 6.22 |
| LOC_Os06g13600.1 | HEAT repeat family protein, putative, expressed                               | Chr6  | 7530834  | 7534857 +  | 5  | 2581 | 6.22 |
| LOC_Os07g32350.1 | WD domain, G-beta repeat domain containing protein, expressed                 | Chr7  | 19231648 | 19236044 - | 12 | 2031 | 6.22 |
| LOC_Os05g43830.1 | hydrolase, alpha/beta fold family domain containing protein, expressed        | Chr5  | 25476707 | 25484371 - | 11 | 2182 | 6.22 |
| LOC_Os05g43830.2 | hydrolase, alpha/beta fold family domain containing protein, expressed        | Chr5  | 25476707 | 25484173 - | 10 | 2054 | 6.22 |
| LOC_Os04g57670.1 | pentatricopeptide, putative, expressed                                        | Chr4  | 34333463 | 34336668 - | 1  | 3238 | 6.23 |
| LOC_Os05g30130.1 | chaperone protein dnaJ 49, putative, expressed                                | Chr5  | 17441559 | 17445927 - | 3  | 2000 | 6.23 |
| LOC_Os11g38650.1 | UDP-glucuronosyl/UDP-glucosyl transferase, putative, expressed                | Chr11 | 22925987 | 22928036 - | 1  | 2082 | 6.23 |
| LOC_Os09g38450.1 | expressed protein                                                             | Chr9  | 22134460 | 22137041 - | 5  | 2328 | 6.23 |
| LOC_Os02g48840.1 | dual specificity protein phosphatase, putative, expressed                     | Chr2  | 29882066 | 29885249 + | 5  | 1384 | 6.23 |
| LOC_Os10g36340.2 | expressed protein                                                             | Chr10 | 19413269 | 19414372 + | 2  | 1062 | 6.23 |
| LOC_Os03g56810.1 | tubulin/FtsZ domain containing protein, putative, expressed                   | Chr3  | 32371758 | 32374910 + | 3  | 2047 | 6.23 |
| LOC_Os05g05346.1 | expressed protein                                                             | Chr5  | 2632335  | 2635234 +  | 1  | 2932 | 6.23 |
| LOC_Os03g17210.2 | expressed protein                                                             | Chr3  | 9594028  | 9598834 +  | 4  | 3935 | 6.23 |



|                  |                                                                                         |       |          |            |    |      |      |
|------------------|-----------------------------------------------------------------------------------------|-------|----------|------------|----|------|------|
| LOC_Os03g24890.1 | RNA recognition motif containing protein, putative, expressed                           | Chr3  | 14176397 | 14181042 + | 7  | 1410 | 6.23 |
| LOC_Os12g29670.1 | expressed protein                                                                       | Chr12 | 17695043 | 17698326 + | 2  | 641  | 6.23 |
| LOC_Os01g50200.1 | UDP-glucuronosyl and UDP-glucosyl transferase domain containing protein, expressed      | Chr1  | 28847957 | 28849824 - | 1  | 1900 | 6.23 |
| LOC_Os05g29860.1 | mitochondrial carrier protein, putative, expressed                                      | Chr5  | 17276735 | 17280614 - | 12 | 1686 | 6.23 |
| LOC_Os05g29860.2 | mitochondrial carrier protein, putative, expressed                                      | Chr5  | 17276735 | 17280614 - | 12 | 1742 | 6.23 |
| LOC_Os05g29860.3 | mitochondrial carrier protein, putative, expressed                                      | Chr5  | 17276738 | 17280614 - | 11 | 1981 | 6.23 |
| LOC_Os04g32150.1 | amidohydrolase family protein, expressed                                                | Chr4  | 19283299 | 19286883 + | 10 | 1712 | 6.24 |
| LOC_Os09g31486.2 | DnaK family protein, putative, expressed                                                | Chr9  | 18987942 | 18991156 - | 4  | 2336 | 6.24 |
| LOC_Os05g06460.1 | dihydrolipoyl dehydrogenase, putative, expressed                                        | Chr5  | 3313391  | 3319717 -  | 15 | 2640 | 6.24 |
| LOC_Os10g41083.1 | uncharacterized Cys-rich domain containing protein, putative, expressed                 | Chr10 | 22062365 | 22065838 - | 4  | 1209 | 6.24 |
| LOC_Os02g17650.1 | tocopherol cyclase, chloroplast precursor, putative, expressed                          | Chr2  | 10155843 | 10164747 - | 10 | 2321 | 6.24 |
| LOC_Os01g58470.1 | expressed protein                                                                       | Chr1  | 33803154 | 33805393 + | 6  | 1318 | 6.24 |
| LOC_Os11g32360.1 | expressed protein                                                                       | Chr11 | 19112659 | 19116616 - | 5  | 2196 | 6.24 |
| LOC_Os02g51820.1 | expressed protein                                                                       | Chr2  | 31747712 | 31749762 + | 2  | 1856 | 6.24 |
| LOC_Os04g38640.3 | OsDegp5 - Putative Deg protease homologue, expressed                                    | Chr4  | 22954845 | 22960460 + | 10 | 1651 | 6.24 |
| LOC_Os07g36870.1 | OsFBX252 - F-box domain containing protein, expressed                                   | Chr7  | 22082548 | 22086458 + | 2  | 1585 | 6.24 |
| LOC_Os11g35050.1 | expressed protein                                                                       | Chr11 | 20533032 | 20538185 - | 7  | 3187 | 6.24 |
| LOC_Os11g35050.2 | expressed protein                                                                       | Chr11 | 20533132 | 20538142 - | 7  | 3038 | 6.24 |
| LOC_Os06g04130.1 | lung seven transmembrane domain containing protein, putative, expressed                 | Chr6  | 1728003  | 1729996 -  | 1  | 2026 | 6.24 |
| LOC_Os02g57800.1 | PPR repeat containing protein, expressed                                                | Chr2  | 35400295 | 35403096 - | 1  | 2834 | 6.24 |
| LOC_Os02g49840.2 | OsMADS57 - MADS-box family gene with MIKCC type-box, expressed                          | Chr2  | 30456666 | 30462733 + | 7  | 1543 | 6.24 |
| LOC_Os02g54130.1 | heat shock protein DnaJ, putative, expressed                                            | Chr2  | 33169843 | 33175612 - | 6  | 1706 | 6.24 |
| LOC_Os02g54130.2 | heat shock protein DnaJ, putative, expressed                                            | Chr2  | 33169843 | 33175612 - | 6  | 1703 | 6.24 |
| LOC_Os02g46150.1 | GAMM1 protein-like, putative, expressed                                                 | Chr2  | 28123211 | 28128165 - | 7  | 2158 | 6.24 |
| LOC_Os05g01610.1 | FYVE zinc finger domain containing protein, expressed                                   | Chr5  | 362500   | 365961 +   | 4  | 2882 | 6.24 |
| LOC_Os04g30210.1 | OsFBL15 - F-box domain and LRR containing protein, expressed                            | Chr4  | 18027688 | 18030495 + | 2  | 2204 | 6.24 |
| LOC_Os04g48484.1 | expressed protein                                                                       | Chr4  | 28903232 | 28904440 - | 1  | 1241 | 6.24 |
| LOC_Os03g07850.1 | tRNA methyltransferase, putative, expressed                                             | Chr3  | 3990105  | 3997815 +  | 10 | 2427 | 6.24 |
| LOC_Os01g66730.2 | exosome complex exonuclease RRP40, putative, expressed                                  | Chr1  | 38755086 | 38759504 - | 11 | 1603 | 6.24 |
| LOC_Os06g04510.1 | enolase, putative, expressed                                                            | Chr6  | 1931296  | 1936380 -  | 17 | 2233 | 6.24 |
| LOC_Os01g22430.1 | OsFBDF3 - F-box and DUF domain containing protein, expressed                            | Chr1  | 12615648 | 12617245 - | 2  | 1438 | 6.24 |
| LOC_Os02g39950.1 | EF hand family protein, putative, expressed                                             | Chr2  | 24158477 | 24163085 + | 9  | 1957 | 6.25 |
| LOC_Os03g54240.1 | expressed protein                                                                       | Chr3  | 31094255 | 31097656 + | 6  | 2199 | 6.25 |
| LOC_Os07g06190.1 | ethylene-insensitive protein 2, putative, expressed                                     | Chr7  | 3016455  | 3024264 +  | 8  | 4630 | 6.25 |
| LOC_Os03g19520.3 | cyclin-related protein, putative, expressed                                             | Chr3  | 10972594 | 10979478 - | 15 | 3346 | 6.25 |
| LOC_Os02g54130.3 | heat shock protein DnaJ, putative, expressed                                            | Chr2  | 33169843 | 33175603 - | 5  | 1834 | 6.25 |
| LOC_Os09g31486.1 | DnaK family protein, putative, expressed                                                | Chr9  | 18987942 | 18991156 - | 5  | 2579 | 6.25 |
| LOC_Os03g17210.1 | expressed protein                                                                       | Chr3  | 9591835  | 9598834 +  | 5  | 4158 | 6.25 |
| LOC_Os02g42374.1 | e2f-associated phosphoprotein, putative, expressed                                      | Chr2  | 25491956 | 25494117 + | 3  | 982  | 6.25 |
| LOC_Os03g38940.1 | expressed protein                                                                       | Chr3  | 21631065 | 21634055 - | 3  | 2844 | 6.25 |
| LOC_Os01g61320.2 | thioredoxin, putative, expressed                                                        | Chr1  | 35477413 | 35479567 + | 5  | 1624 | 6.25 |
| LOC_Os01g61320.1 | thioredoxin, putative, expressed                                                        | Chr1  | 35477413 | 35479577 + | 5  | 1618 | 6.25 |
| LOC_Os03g51000.2 | 3,4-dihydroxy-2-butanone kinase, putative, expressed                                    | Chr3  | 29137663 | 29145552 - | 20 | 2841 | 6.25 |
| LOC_Os12g19290.1 | AGC_AGC_other_NDRh_TRCd.4 - ACG kinases include homologs to PKA, PKG and PKC, expressed | Chr12 | 11184671 | 11191740 + | 13 | 2919 | 6.25 |
| LOC_Os01g14140.2 | X8 domain containing protein, expressed                                                 | Chr1  | 7928083  | 7929762 -  | 4  | 888  | 6.25 |

|                  |                                                                                                   |       |          |            |    |      |      |
|------------------|---------------------------------------------------------------------------------------------------|-------|----------|------------|----|------|------|
| LOC_Os11g11500.1 | serpin domain containing protein, putative, expressed                                             | Chr11 | 6392784  | 6394753 -  | 2  | 1560 | 6.25 |
| LOC_Os06g46570.2 | galactosyltransferase, putative, expressed                                                        | Chr6  | 28275643 | 28278915 + | 9  | 1766 | 6.26 |
| LOC_Os05g44210.2 | trehalose-6-phosphate synthase, expressed                                                         | Chr5  | 25714294 | 25722089 + | 17 | 3650 | 6.26 |
| LOC_Os10g23204.1 | CutA, chloroplast precursor, putative, expressed                                                  | Chr10 | 12107765 | 12113020 + | 6  | 1164 | 6.26 |
| LOC_Os11g01600.2 | macrophage migration inhibitory factor, putative, expressed                                       | Chr11 | 352200   | 355321 +   | 3  | 1351 | 6.26 |
| LOC_Os11g01600.1 | macrophage migration inhibitory factor, putative, expressed                                       | Chr11 | 352200   | 355321 +   | 3  | 1577 | 6.26 |
| LOC_Os03g62870.4 | DNA-directed RNA polymerases I, II, and III subunit RPABC3, putative, expressed                   | Chr3  | 35562754 | 35565072 - | 6  | 1387 | 6.26 |
| LOC_Os03g63110.1 | prefoldin, putative, expressed                                                                    | Chr3  | 35673283 | 35676863 - | 3  | 2128 | 6.26 |
| LOC_Os09g12660.2 | glucose-1-phosphate adenylyltransferase large subunit, chloroplast precursor, putative, expressed | Chr9  | 7245406  | 7249816 -  | 10 | 2293 | 6.26 |
| LOC_Os09g30180.4 | OsFBX331 - F-box domain containing protein, expressed                                             | Chr9  | 18364587 | 18368259 + | 5  | 1948 | 6.26 |
| LOC_Os11g26594.1 | expressed protein                                                                                 | Chr11 | 15236666 | 15239290 + | 2  | 1559 | 6.26 |
| LOC_Os10g25060.1 | expressed protein                                                                                 | Chr10 | 12899339 | 12902125 - | 4  | 1571 | 6.26 |
| LOC_Os08g11220.5 | expressed protein                                                                                 | Chr8  | 6598266  | 6603406 +  | 4  | 958  | 6.26 |
| LOC_Os03g58570.1 | WD domain, G-beta repeat domain containing protein, expressed                                     | Chr3  | 33346109 | 33349987 + | 8  | 3162 | 6.26 |
| LOC_Os02g17990.2 | Leucine Rich Repeat family protein, expressed                                                     | Chr2  | 10437393 | 10440986 + | 12 | 1905 | 6.26 |
| LOC_Os08g09710.1 | OsFBX271 - F-box domain containing protein, expressed                                             | Chr8  | 5609250  | 5612375 +  | 4  | 2029 | 6.26 |
| LOC_Os03g27340.1 | expressed protein                                                                                 | Chr3  | 15658867 | 15661409 - | 3  | 2467 | 6.27 |
| LOC_Os10g41870.1 | expressed protein                                                                                 | Chr10 | 22530662 | 22533290 - | 4  | 2197 | 6.27 |
| LOC_Os02g17990.1 | Leucine Rich Repeat family protein, expressed                                                     | Chr2  | 10437393 | 10440986 + | 11 | 1948 | 6.27 |
| LOC_Os02g17990.3 | Leucine Rich Repeat family protein, expressed                                                     | Chr2  | 10438024 | 10440915 + | 10 | 1892 | 6.27 |
| LOC_Os09g16920.1 | desaturase/cytochrome b5 protein, putative, expressed                                             | Chr9  | 10338558 | 10340697 + | 1  | 2172 | 6.27 |
| LOC_Os05g30920.2 | OsFBX167 - F-box domain containing protein, expressed                                             | Chr5  | 17951299 | 17954234 + | 3  | 861  | 6.27 |
| LOC_Os06g01460.1 | expressed protein                                                                                 | Chr6  | 276707   | 282180 -   | 15 | 3081 | 6.27 |
| LOC_Os02g17990.4 | Leucine Rich Repeat family protein, expressed                                                     | Chr2  | 10437406 | 10440986 + | 12 | 2060 | 6.27 |
| LOC_Os01g14140.1 | X8 domain containing protein, expressed                                                           | Chr1  | 7928083  | 7929764 -  | 4  | 894  | 6.27 |
| LOC_Os03g56820.3 | fatty acid hydroxylase, putative, expressed                                                       | Chr3  | 32375903 | 32378468 + | 7  | 1456 | 6.27 |
| LOC_Os03g56820.2 | fatty acid hydroxylase, putative, expressed                                                       | Chr3  | 32375903 | 32378469 + | 7  | 1462 | 6.27 |
| LOC_Os04g46730.3 | thioesterase family protein, putative, expressed                                                  | Chr4  | 27700899 | 27702656 - | 5  | 916  | 6.27 |
| LOC_Os09g34010.1 | expressed protein                                                                                 | Chr9  | 20078174 | 20082637 + | 7  | 2969 | 6.27 |
| LOC_Os12g03400.1 | expressed protein                                                                                 | Chr12 | 1317605  | 1319925 +  | 2  | 1554 | 6.27 |
| LOC_Os11g08330.1 | POLD1 - Putative DNA polymerase delta catalytic subunit, expressed                                | Chr11 | 4387460  | 4397808 -  | 30 | 4700 | 6.27 |
| LOC_Os10g41870.2 | expressed protein                                                                                 | Chr10 | 22530662 | 22534379 - | 4  | 3210 | 6.27 |
| LOC_Os03g25420.1 | expressed protein                                                                                 | Chr3  | 14533792 | 14537193 + | 4  | 3205 | 6.27 |
| LOC_Os03g51470.1 | expressed protein                                                                                 | Chr3  | 29451096 | 29453625 - | 2  | 948  | 6.27 |
| LOC_Os03g08630.1 | NAD-dependent epimerase/dehydratase, putative, expressed                                          | Chr3  | 4444015  | 4446472 +  | 3  | 1789 | 6.27 |
| LOC_Os01g15580.1 | disease resistance protein RGA2, putative, expressed                                              | Chr1  | 8751071  | 8755448 +  | 1  | 4410 | 6.28 |
| LOC_Os03g50100.1 | expressed protein                                                                                 | Chr3  | 28572782 | 28577117 - | 4  | 3579 | 6.28 |
| LOC_Os04g42120.1 | N-acetyltransferase ESCO2, putative, expressed                                                    | Chr4  | 24935457 | 24938782 - | 7  | 2161 | 6.28 |
| LOC_Os01g45620.1 | CGMC_MAPKCMGC_2.5 - CGMC includes CDA, MAPK, GSK3, and CLKC kinases, expressed                    | Chr1  | 25917623 | 25922978 - | 10 | 2314 | 6.28 |
| LOC_Os08g11220.4 | expressed protein                                                                                 | Chr8  | 6598269  | 6603406 +  | 4  | 1099 | 6.28 |
| LOC_Os04g51430.1 | retrotransposon protein, putative, unclassified, expressed                                        | Chr4  | 30457951 | 30463340 + | 5  | 4759 | 6.28 |
| LOC_Os11g09640.1 | OsFBX408 - F-box domain containing protein, expressed                                             | Chr11 | 5152682  | 5156419 -  | 5  | 2447 | 6.28 |
| LOC_Os07g47650.1 | OsFBK19 - F-box domain and kelch repeat containing protein, expressed                             | Chr7  | 28476421 | 28479703 + | 3  | 1921 | 6.28 |
| LOC_Os12g21500.1 | exosome complex exonuclease, putative, expressed                                                  | Chr12 | 12075112 | 12087744 + | 8  | 1755 | 6.28 |
| LOC_Os10g40020.3 | oxidoreductase, short chain dehydrogenase/reductase family domain containing family, expressed    | Chr10 | 21434984 | 21439378 - | 11 | 2510 | 6.28 |

|                  |                                                                                                 |       |          |            |    |      |      |
|------------------|-------------------------------------------------------------------------------------------------|-------|----------|------------|----|------|------|
| LOC_Os02g55310.1 | pentatricopeptide, putative, expressed                                                          | Chr2  | 33857140 | 33859405 - | 2  | 2046 | 6.28 |
| LOC_Os05g08770.1 | uncharacterized protein At4g06744 precursor, putative, expressed                                | Chr5  | 4812906  | 4815430 -  | 1  | 2557 | 6.28 |
| LOC_Os08g15080.1 | proline rich protein 3, putative, expressed                                                     | Chr8  | 9123560  | 9127609 +  | 8  | 2482 | 6.28 |
| LOC_Os12g21789.2 | expressed protein                                                                               | Chr12 | 12264653 | 12268289 - | 3  | 2170 | 6.28 |
| LOC_Os01g45750.1 | bile acid sodium symporter family protein, putative, expressed                                  | Chr1  | 25973522 | 25980440 + | 13 | 2388 | 6.29 |
| LOC_Os05g06450.1 | tubulin/FtsZ domain containing protein, putative, expressed                                     | Chr5  | 3307928  | 3312616 -  | 12 | 2480 | 6.29 |
| LOC_Os07g47250.2 | lipase precursor, putative, expressed                                                           | Chr7  | 28241119 | 28245410 + | 11 | 1817 | 6.29 |
| LOC_Os03g48310.1 | plasma membrane ATPase, putative, expressed                                                     | Chr3  | 27510164 | 27517321 + | 21 | 3999 | 6.29 |
| LOC_Os04g46730.2 | thioesterase family protein, putative, expressed                                                | Chr4  | 27700899 | 27702675 - | 5  | 943  | 6.29 |
| LOC_Os03g50880.1 | class I glutamine amidotransferase, putative, expressed                                         | Chr3  | 29067747 | 29071552 - | 8  | 1461 | 6.29 |
| LOC_Os06g36160.1 | 40S ribosomal protein S24, putative, expressed                                                  | Chr6  | 21163218 | 21167192 + | 4  | 971  | 6.29 |
| LOC_Os01g63970.1 | sialyltransferase family domain containing protein, expressed                                   | Chr1  | 37133557 | 37135392 + | 1  | 1868 | 6.29 |
| LOC_Os04g43420.1 | PTAC5, putative, expressed                                                                      | Chr4  | 25700861 | 25703587 + | 6  | 2086 | 6.29 |
| LOC_Os03g15890.3 | RNA recognition motif containing protein, expressed                                             | Chr3  | 8767518  | 8770510 -  | 5  | 1987 | 6.29 |
| LOC_Os05g06750.1 | dihydropyridyl dehydrogenase, mitochondrial precursor, putative, expressed                      | Chr5  | 3526717  | 3530425 +  | 2  | 2107 | 6.29 |
| LOC_Os11g37510.1 | ribosomal protein L4, putative, expressed                                                       | Chr11 | 22139918 | 22143879 + | 7  | 1808 | 6.29 |
| LOC_Os02g52314.1 | BTB1 - Bric-a-Brac, Tramtrack, Broad Complex BTB domain, expressed                              | Chr2  | 32023315 | 32027152 - | 4  | 1125 | 6.29 |
| LOC_Os12g32280.1 | SWIB/MDM2 domain containing protein, expressed                                                  | Chr12 | 19488028 | 19492689 - | 2  | 720  | 6.29 |
| LOC_Os01g56680.2 | photosystem II reaction center W protein, chloroplast precursor, putative, expressed            | Chr1  | 32707831 | 32709287 - | 1  | 1489 | 6.30 |
| LOC_Os01g56680.1 | photosystem II reaction center W protein, chloroplast precursor, putative, expressed            | Chr1  | 32707831 | 32709294 - | 2  | 1419 | 6.30 |
| LOC_Os08g08140.1 | receptor-like kinase, putative, expressed                                                       | Chr8  | 4631720  | 4638679 +  | 13 | 3713 | 6.30 |
| LOC_Os09g27070.1 | E2F-related protein, putative, expressed                                                        | Chr9  | 16470982 | 16474586 + | 8  | 1471 | 6.30 |
| LOC_Os07g19070.2 | prefoldin, putative, expressed                                                                  | Chr7  | 11287871 | 11292046 - | 1  | 4208 | 6.30 |
| LOC_Os04g57870.1 | expressed protein                                                                               | Chr4  | 34457067 | 34463775 - | 7  | 4346 | 6.30 |
| LOC_Os11g07940.1 | expressed protein                                                                               | Chr11 | 4102967  | 4110192 +  | 9  | 2286 | 6.30 |
| LOC_Os10g41280.1 | expressed protein                                                                               | Chr10 | 22187267 | 22188504 + | 4  | 749  | 6.30 |
| LOC_Os04g48820.1 | deoxyribonuclease tatD, putative, expressed                                                     | Chr4  | 29114952 | 29119666 - | 8  | 2228 | 6.30 |
| LOC_Os06g04510.2 | enolase, putative, expressed                                                                    | Chr6  | 1931296  | 1936372 -  | 15 | 2895 | 6.30 |
| LOC_Os03g19220.1 | expressed protein                                                                               | Chr3  | 10804093 | 10806772 - | 7  | 848  | 6.30 |
| LOC_Os03g19220.2 | expressed protein                                                                               | Chr3  | 10804093 | 10806772 - | 7  | 852  | 6.30 |
| LOC_Os07g45280.1 | Mo25, putative, expressed                                                                       | Chr7  | 27014191 | 27019009 + | 11 | 1951 | 6.30 |
| LOC_Os06g15570.2 | retrotransposon protein, putative, unclassified, expressed                                      | Chr6  | 8826989  | 8832311 -  | 2  | 1166 | 6.30 |
| LOC_Os01g56310.1 | radical SAM enzyme, putative, expressed                                                         | Chr1  | 32440171 | 32443318 + | 7  | 1618 | 6.30 |
| LOC_Os07g30930.1 | pentatricopeptide repeat domain containing protein, putative, expressed                         | Chr7  | 18309682 | 18312468 + | 1  | 2819 | 6.30 |
| LOC_Os11g09850.1 | expressed protein                                                                               | Chr11 | 5276417  | 5279977 +  | 6  | 1706 | 6.31 |
| LOC_Os11g09850.2 | expressed protein                                                                               | Chr11 | 5276417  | 5279966 +  | 7  | 1783 | 6.31 |
| LOC_Os09g12660.1 | glucose-1-phosphate adenyltransferase large subunit, chloroplast precursor, putative, expressed | Chr9  | 7245359  | 7249816 -  | 10 | 2349 | 6.31 |
| LOC_Os09g33520.1 | expressed protein                                                                               | Chr9  | 19769695 | 19775102 + | 7  | 3124 | 6.31 |
| LOC_Os02g52910.1 | zinc finger protein, putative, expressed                                                        | Chr2  | 32349914 | 32352663 - | 5  | 1958 | 6.31 |
| LOC_Os08g34190.1 | stromal cell-derived factor 2-like protein precursor, putative, expressed                       | Chr8  | 21433598 | 21436735 - | 6  | 1402 | 6.31 |
| LOC_Os03g51000.1 | 3,4-dihydroxy-2-butanone kinase, putative, expressed                                            | Chr3  | 29137663 | 29145550 - | 19 | 2900 | 6.31 |
| LOC_Os08g40630.2 | mTERF domain containing protein, expressed                                                      | Chr8  | 25719257 | 25721973 - | 2  | 2653 | 6.31 |
| LOC_Os08g40630.1 | mTERF domain containing protein, expressed                                                      | Chr8  | 25719255 | 25721977 - | 1  | 2755 | 6.31 |
| LOC_Os02g46140.1 | OsFBX59 - F-box domain containing protein, expressed                                            | Chr2  | 28122304 | 28124165 + | 2  | 1739 | 6.31 |
| LOC_Os02g46140.2 | OsFBX59 - F-box domain containing protein, expressed                                            | Chr2  | 28122304 | 28124165 + | 3  | 1578 | 6.31 |

|                  |                                                                     |       |          |            |    |      |      |
|------------------|---------------------------------------------------------------------|-------|----------|------------|----|------|------|
| LOC_Os05g40720.1 | glycosyl transferase, family 8, putative, expressed                 | Chr5  | 23874177 | 23878278 - | 11 | 2356 | 6.31 |
| LOC_Os05g46270.1 | FEN1A - Putative flap endonuclease protein, expressed               | Chr5  | 26830170 | 26834200 - | 17 | 2055 | 6.31 |
| LOC_Os04g47860.5 | ZOS4-11 - C2H2 zinc finger protein, expressed                       | Chr4  | 28408664 | 28416032 + | 4  | 3065 | 6.31 |
| LOC_Os04g47860.4 | ZOS4-11 - C2H2 zinc finger protein, expressed                       | Chr4  | 28408664 | 28416032 + | 4  | 3068 | 6.31 |
| LOC_Os03g10680.1 | formin-like protein 6 precursor, putative, expressed                | Chr3  | 5458096  | 5462607 +  | 4  | 3471 | 6.31 |
| LOC_Os03g54063.2 | expressed protein                                                   | Chr3  | 30994449 | 30996882 - | 3  | 1295 | 6.31 |
| LOC_Os09g07020.2 | oxidoreductase, putative, expressed                                 | Chr9  | 3404354  | 3408176 -  | 12 | 1980 | 6.31 |
| LOC_Os09g07020.1 | oxidoreductase, putative, expressed                                 | Chr9  | 3404354  | 3408176 -  | 12 | 1983 | 6.31 |
| LOC_Os07g10120.1 | expressed protein                                                   | Chr7  | 5431553  | 5436179 +  | 10 | 1966 | 6.32 |
| LOC_Os02g19440.3 | sirohdrochlorin ferrochelatase, putative, expressed                 | Chr2  | 11353283 | 11357740 - | 6  | 1617 | 6.32 |
| LOC_Os11g13420.1 | RNA binding protein, putative, expressed                            | Chr11 | 7346265  | 7348818 -  | 7  | 1491 | 6.32 |
| LOC_Os05g09370.4 | kinase, pfkB family, putative, expressed                            | Chr5  | 5254254  | 5262152 -  | 10 | 2181 | 6.32 |
| LOC_Os05g09370.2 | kinase, pfkB family, putative, expressed                            | Chr5  | 5254254  | 5262138 -  | 11 | 2330 | 6.32 |
| LOC_Os08g43370.1 | 6-phosphogluconolactonase, putative, expressed                      | Chr8  | 27403439 | 27406438 + | 3  | 1866 | 6.32 |
| LOC_Os01g56870.1 | expressed protein                                                   | Chr1  | 32842662 | 32847884 + | 10 | 2871 | 6.32 |
| LOC_Os03g50900.1 | transposon protein, putative, unclassified, expressed               | Chr3  | 29076706 | 29079305 - | 1  | 2632 | 6.32 |
| LOC_Os04g40430.1 | surfeit locus protein, putative, expressed                          | Chr4  | 24026632 | 24029053 + | 5  | 1370 | 6.32 |
| LOC_Os04g40430.2 | surfeit locus protein, putative, expressed                          | Chr4  | 24026632 | 24029054 + | 5  | 1368 | 6.32 |
| LOC_Os07g47110.1 | OsFBT11 - F-box and tubby domain containing protein, expressed      | Chr7  | 28173000 | 28176820 + | 5  | 2328 | 6.32 |
| LOC_Os09g02729.1 | phospholipase C, putative, expressed                                | Chr9  | 1226547  | 1238533 -  | 8  | 2044 | 6.32 |
| LOC_Os02g54130.4 | heat shock protein DnaJ, putative, expressed                        | Chr2  | 33169843 | 33172364 - | 3  | 1065 | 6.32 |
| LOC_Os12g21789.1 | expressed protein                                                   | Chr12 | 12264653 | 12267520 - | 2  | 2026 | 6.32 |
| LOC_Os04g43350.1 | expressed protein                                                   | Chr4  | 25637067 | 25639424 + | 3  | 1653 | 6.32 |
| LOC_Os04g34976.2 | SET domain containing protein, expressed                            | Chr4  | 21258335 | 21262830 + | 9  | 2124 | 6.32 |
| LOC_Os02g48220.1 | expressed protein                                                   | Chr2  | 29523354 | 29528328 - | 5  | 3237 | 6.32 |
| LOC_Os01g06000.1 | PPR repeat containing protein, expressed                            | Chr1  | 2862560  | 2867272 -  | 4  | 3354 | 6.33 |
| LOC_Os05g09370.1 | kinase, pfkB family, putative, expressed                            | Chr5  | 5254246  | 5262132 -  | 10 | 2136 | 6.33 |
| LOC_Os01g73780.1 | chloroplast outer envelope 24 kD protein, putative, expressed       | Chr1  | 42735992 | 42737940 - | 2  | 781  | 6.33 |
| LOC_Os06g41710.1 | CW-type Zinc Finger, putative, expressed                            | Chr6  | 24986838 | 24998104 - | 18 | 3881 | 6.33 |
| LOC_Os02g10230.1 | metal cation transporter, putative, expressed                       | Chr2  | 5357310  | 5361634 +  | 12 | 1726 | 6.33 |
| LOC_Os09g38970.1 | zinc finger family protein, putative, expressed                     | Chr9  | 22376888 | 22382492 + | 9  | 3041 | 6.33 |
| LOC_Os11g13990.1 | AAA-type ATPase family protein, putative, expressed                 | Chr11 | 7753325  | 7762397 -  | 9  | 3892 | 6.33 |
| LOC_Os07g47950.1 | expressed protein                                                   | Chr7  | 28637847 | 28642776 + | 10 | 1883 | 6.33 |
| LOC_Os02g45490.4 | expressed protein                                                   | Chr2  | 27667909 | 27671421 - | 3  | 3442 | 6.33 |
| LOC_Os12g01240.1 | mitochondrial substrate carrier family protein, putative, expressed | Chr12 | 136205   | 141120 -   | 7  | 2801 | 6.33 |
| LOC_Os01g02860.1 | expressed protein                                                   | Chr1  | 1002459  | 1007068 -  | 12 | 3426 | 6.33 |
| LOC_Os07g32600.2 | glucan endo-1,3-beta-glucosidase precursor, putative, expressed     | Chr7  | 19436899 | 19439331 + | 2  | 2250 | 6.33 |
| LOC_Os11g05394.1 | nucampholin, putative, expressed                                    | Chr11 | 2418477  | 2423363 -  | 10 | 3059 | 6.33 |
| LOC_Os03g63720.1 | exosome complex exonuclease, putative, expressed                    | Chr3  | 35979772 | 35982391 - | 7  | 1429 | 6.33 |
| LOC_Os09g25950.1 | regulator protein, putative, expressed                              | Chr9  | 15583140 | 15586502 + | 9  | 1784 | 6.33 |
| LOC_Os02g39050.1 | pre-mRNA-splicing factor ISY1, putative, expressed                  | Chr2  | 23578398 | 23580847 - | 2  | 1555 | 6.33 |
| LOC_Os03g06720.1 | expressed protein                                                   | Chr3  | 3417324  | 3424868 +  | 24 | 3751 | 6.34 |
| LOC_Os10g25450.1 | OsSub60 - Putative Subtilisin homologue, expressed                  | Chr10 | 13160291 | 13163994 + | 2  | 2907 | 6.34 |
| LOC_Os03g51090.1 | OsFBDF17 - F-box and DUF domain containing protein, expressed       | Chr3  | 29209943 | 29212204 + | 2  | 2188 | 6.34 |
| LOC_Os11g05394.2 | nucampholin, putative, expressed                                    | Chr11 | 2418477  | 2423365 -  | 9  | 3123 | 6.34 |

|                  |                                                                                       |       |          |            |    |      |      |
|------------------|---------------------------------------------------------------------------------------|-------|----------|------------|----|------|------|
| LOC_Os09g30180.1 | OsFBX331 - F-box domain containing protein, expressed                                 | Chr9  | 18364571 | 18368259 + | 6  | 2087 | 6.34 |
| LOC_Os09g30180.3 | OsFBX331 - F-box domain containing protein, expressed                                 | Chr9  | 18364587 | 18368259 + | 6  | 2066 | 6.34 |
| LOC_Os08g05670.1 | HEAT repeat family protein, putative, expressed                                       | Chr8  | 3031282  | 3038465 -  | 15 | 2785 | 6.34 |
| LOC_Os02g30650.1 | heavy metal-associated domain containing protein, expressed                           | Chr2  | 18252570 | 18256034 + | 5  | 1630 | 6.34 |
| LOC_Os01g51530.1 | methyltransferase domain containing protein, expressed                                | Chr1  | 29598881 | 29601172 - | 8  | 1452 | 6.34 |
| LOC_Os12g02380.1 | elongation factor P, putative, expressed                                              | Chr12 | 776593   | 779942 +   | 7  | 1469 | 6.34 |
| LOC_Os07g44730.2 | expressed protein                                                                     | Chr7  | 26702923 | 26705243 - | 6  | 928  | 6.34 |
| LOC_Os01g72980.1 | tRNA uridine 5-carboxymethylaminomethyl modification enzyme gidA, putative, expressed | Chr1  | 42329246 | 42335754 - | 13 | 3130 | 6.34 |
| LOC_Os01g72980.2 | tRNA uridine 5-carboxymethylaminomethyl modification enzyme gidA, putative, expressed | Chr1  | 42329246 | 42335754 - | 13 | 3080 | 6.34 |
| LOC_Os07g07010.1 | glucosyltransferase, putative, expressed                                              | Chr7  | 3453911  | 3457173 +  | 6  | 2166 | 6.34 |
| LOC_Os06g50360.2 | pseudouridine synthase family protein, putative, expressed                            | Chr6  | 30480316 | 30485250 - | 7  | 2640 | 6.34 |
| LOC_Os06g50360.1 | pseudouridine synthase family protein, putative, expressed                            | Chr6  | 30480316 | 30485250 - | 7  | 2644 | 6.34 |
| LOC_Os03g21830.1 | appr-1-p processing enzyme family protein, putative, expressed                        | Chr3  | 12478017 | 12480135 + | 7  | 1180 | 6.34 |
| LOC_Os02g53790.2 | adenylate kinase, putative, expressed                                                 | Chr2  | 32951605 | 32955075 + | 10 | 1624 | 6.35 |
| LOC_Os12g36194.1 | nucleoside diphosphate kinase, putative, expressed                                    | Chr12 | 22182885 | 22189908 + | 7  | 1800 | 6.35 |
| LOC_Os02g49770.1 | NHL repeat-containing protein, putative, expressed                                    | Chr2  | 30427720 | 30431741 + | 7  | 2182 | 6.35 |
| LOC_Os02g52810.2 | remorin C-terminal domain containing protein, putative, expressed                     | Chr2  | 32286589 | 32291688 - | 7  | 2758 | 6.35 |
| LOC_Os02g52810.1 | remorin C-terminal domain containing protein, putative, expressed                     | Chr2  | 32286589 | 32292090 - | 8  | 2728 | 6.35 |
| LOC_Os07g48320.1 | HAD superfamily phosphatase, putative, expressed                                      | Chr7  | 28877263 | 28879558 + | 3  | 1093 | 6.35 |
| LOC_Os10g08580.1 | FAD binding domain of DNA photolyase domain containing protein, expressed             | Chr10 | 4663129  | 4666991 -  | 10 | 2108 | 6.35 |
| LOC_Os05g49220.2 | GTP-binding protein, putative, expressed                                              | Chr5  | 28242004 | 28244772 - | 9  | 1967 | 6.35 |
| LOC_Os06g44320.1 | expressed protein                                                                     | Chr6  | 26756214 | 26757596 - | 2  | 1266 | 6.35 |
| LOC_Os04g40650.2 | metalloprotease ATP23, putative, expressed                                            | Chr4  | 24129561 | 24133242 - | 5  | 1118 | 6.35 |
| LOC_Os01g29830.2 | expressed protein                                                                     | Chr1  | 16716655 | 16719424 + | 6  | 1560 | 6.35 |
| LOC_Os01g29830.1 | expressed protein                                                                     | Chr1  | 16716655 | 16719424 + | 6  | 1578 | 6.35 |
| LOC_Os09g30180.2 | OsFBX331 - F-box domain containing protein, expressed                                 | Chr9  | 18364587 | 18368259 + | 7  | 2235 | 6.35 |
| LOC_Os07g47250.1 | lipase precursor, putative, expressed                                                 | Chr7  | 28240466 | 28245450 + | 10 | 2710 | 6.35 |
| LOC_Os06g30910.1 | CAAX amino terminal protease family protein, putative, expressed                      | Chr6  | 17973891 | 17978690 + | 4  | 1887 | 6.35 |
| LOC_Os02g27620.1 | endonuclease/exonuclease/phosphatase family domain containing protein, expressed      | Chr2  | 16360083 | 16364429 - | 9  | 2267 | 6.35 |
| LOC_Os01g59560.1 | protein kinase domain containing protein, expressed                                   | Chr1  | 34437262 | 34444377 - | 9  | 2970 | 6.36 |
| LOC_Os02g02500.1 | remorin family protein, putative, expressed                                           | Chr2  | 890263   | 894233 +   | 6  | 2065 | 6.36 |
| LOC_Os04g40650.1 | metalloprotease ATP23, putative, expressed                                            | Chr4  | 24129507 | 24133300 - | 5  | 1210 | 6.36 |
| LOC_Os01g67550.1 | FAD binding domain containing protein, expressed                                      | Chr1  | 39262856 | 39266671 + | 11 | 2882 | 6.36 |
| LOC_Os03g27030.3 | RNA recognition motif containing protein, expressed                                   | Chr3  | 15475271 | 15477241 - | 4  | 1297 | 6.36 |
| LOC_Os07g03870.1 | receptor like protein kinase, putative, expressed                                     | Chr7  | 1612858  | 1616245 -  | 1  | 3420 | 6.36 |
| LOC_Os01g03980.1 | expressed protein                                                                     | Chr1  | 1711930  | 1712947 -  | 1  | 1050 | 6.36 |
| LOC_Os06g34040.1 | DJ-1 family protein, putative, expressed                                              | Chr6  | 19824521 | 19829657 - | 8  | 1852 | 6.36 |
| LOC_Os08g11720.2 | expressed protein                                                                     | Chr8  | 6866435  | 6871560 -  | 4  | 956  | 6.36 |
| LOC_Os01g71330.1 | expressed protein                                                                     | Chr1  | 41343327 | 41344284 + | 2  | 921  | 6.36 |
| LOC_Os06g10580.2 | cyclic nucleotide-gated ion channel, putative, expressed                              | Chr6  | 5461017  | 5471943 -  | 13 | 3313 | 6.37 |
| LOC_Os04g40930.1 | MYB family transcription factor, putative, expressed                                  | Chr4  | 24296450 | 24301211 + | 5  | 2043 | 6.37 |
| LOC_Os12g30520.1 | pumilio-family RNA binding repeat containing protein, expressed                       | Chr12 | 18314936 | 18319067 - | 6  | 3066 | 6.37 |
| LOC_Os11g38010.1 | targeting protein for Xklp2, putative, expressed                                      | Chr11 | 22550213 | 22554890 + | 7  | 2118 | 6.37 |
| LOC_Os03g62430.1 | OsWAK28 - OsWAK receptor-like protein kinase, expressed                               | Chr3  | 35360733 | 35365166 - | 5  | 3684 | 6.37 |
| LOC_Os02g42374.4 | e2f-associated phosphoprotein, putative, expressed                                    | Chr2  | 25491974 | 25494117 + | 2  | 1117 | 6.37 |

|                  |                                                                                                 |       |          |            |    |      |      |
|------------------|-------------------------------------------------------------------------------------------------|-------|----------|------------|----|------|------|
| LOC_Os02g07830.1 | OsHKT1%3B3 - Na%2B transporter, expressed                                                       | Chr2  | 4103333  | 4105657 +  | 3  | 1829 | 6.37 |
| LOC_Os03g16220.6 | oxidoreductase, short chain dehydrogenase/reductase family domain containing protein, expressed | Chr3  | 8945063  | 8947981 -  | 5  | 1462 | 6.37 |
| LOC_Os06g22070.1 | mitochondrial glycoprotein, putative, expressed                                                 | Chr6  | 12801432 | 12804044 + | 3  | 1299 | 6.37 |
| LOC_Os07g38490.1 | GDP-fucose protein-O-fucosyltransferase 2, putative, expressed                                  | Chr7  | 23115846 | 23119820 + | 3  | 2078 | 6.37 |
| LOC_Os01g62210.1 | 50S ribosomal protein L17, putative, expressed                                                  | Chr1  | 36007366 | 36009974 + | 6  | 1096 | 6.37 |
| LOC_Os01g06680.1 | retrotransposon protein, putative, unclassified, expressed                                      | Chr1  | 3147379  | 3152501 -  | 4  | 3009 | 6.37 |
| LOC_Os02g45490.1 | expressed protein                                                                               | Chr2  | 27667909 | 27671425 - | 2  | 3492 | 6.37 |
| LOC_Os02g44810.1 | tRNA pseudouridine synthase family protein, putative, expressed                                 | Chr2  | 27134555 | 27136740 + | 2  | 2158 | 6.38 |
| LOC_Os06g10810.1 | phosphate carrier protein, mitochondrial precursor, putative, expressed                         | Chr6  | 5638272  | 5641660 +  | 6  | 1937 | 6.38 |
| LOC_Os01g41010.1 | DUF581 domain containing protein, expressed                                                     | Chr1  | 23224233 | 23226650 + | 4  | 1632 | 6.38 |
| LOC_Os06g08400.1 | LIM domain-containing protein, putative, expressed                                              | Chr6  | 4093231  | 4100936 +  | 12 | 2560 | 6.38 |
| LOC_Os01g41010.2 | DUF581 domain containing protein, expressed                                                     | Chr1  | 23224351 | 23226620 + | 4  | 1516 | 6.38 |
| LOC_Os09g28890.1 | transposon protein, putative, CACTA, En/Spm sub-class, expressed                                | Chr9  | 17556929 | 17558591 + | 1  | 1695 | 6.38 |
| LOC_Os05g34790.1 | GYF domain containing protein, putative, expressed                                              | Chr5  | 20644708 | 20648700 + | 7  | 968  | 6.38 |
| LOC_Os10g25210.2 | OsFBX384 - F-box domain containing protein, expressed                                           | Chr10 | 13015120 | 13017947 - | 3  | 2056 | 6.38 |
| LOC_Os02g49840.1 | OsMADS57 - MADS-box family gene with MIKCC type-box, expressed                                  | Chr2  | 30456666 | 30462759 + | 8  | 1640 | 6.38 |
| LOC_Os02g49840.4 | OsMADS57 - MADS-box family gene with MIKCC type-box, expressed                                  | Chr2  | 30456666 | 30462759 + | 8  | 1634 | 6.38 |
| LOC_Os03g16220.5 | oxidoreductase, short chain dehydrogenase/reductase family domain containing protein, expressed | Chr3  | 8945110  | 8947981 -  | 4  | 2254 | 6.38 |
| LOC_Os03g35840.1 | transposon protein, putative, unclassified, expressed                                           | Chr3  | 19858185 | 19860916 - | 6  | 2520 | 6.38 |
| LOC_Os01g16100.1 | translin, putative, expressed                                                                   | Chr1  | 9067360  | 9071396 -  | 7  | 1713 | 6.38 |
| LOC_Os09g06499.2 | sulfate transporter 4.1, chloroplast precursor, putative, expressed                             | Chr9  | 3073884  | 3085958 +  | 14 | 2609 | 6.38 |
| LOC_Os07g12140.2 | PPR repeat domain containing protein, putative, expressed                                       | Chr7  | 6790686  | 6796631 +  | 3  | 2507 | 6.38 |
| LOC_Os07g01200.2 | tetraacyldisaccharide 4-kinase, putative, expressed                                             | Chr7  | 115439   | 117742 -   | 3  | 2127 | 6.39 |
| LOC_Os07g23990.2 | tetratricopeptide repeat domain containing protein, putative, expressed                         | Chr7  | 13589491 | 13604623 + | 24 | 6958 | 6.39 |
| LOC_Os07g23990.1 | tetratricopeptide repeat domain containing protein, putative, expressed                         | Chr7  | 13589491 | 13604623 + | 24 | 6974 | 6.39 |
| LOC_Os05g06450.2 | tubulin/FtsZ domain containing protein, putative, expressed                                     | Chr5  | 3307928  | 3312616 -  | 11 | 2883 | 6.39 |
| LOC_Os12g37640.2 | xaa-Pro aminopeptidase, putative, expressed                                                     | Chr12 | 23106121 | 23110711 + | 11 | 1854 | 6.39 |
| LOC_Os01g59910.4 | OsFBX29 - F-box domain containing protein, expressed                                            | Chr1  | 34645046 | 34646325 - | 2  | 1267 | 6.39 |
| LOC_Os01g48900.1 | dynamamin-related protein 1A, putative, expressed                                               | Chr1  | 28054938 | 28060595 + | 14 | 3139 | 6.39 |
| LOC_Os07g40930.1 | WD repeat-containing protein 12, putative, expressed                                            | Chr7  | 24493702 | 24497576 - | 13 | 2090 | 6.39 |
| LOC_Os11g32360.2 | expressed protein                                                                               | Chr11 | 19112659 | 19116616 - | 4  | 2909 | 6.40 |
| LOC_Os01g58520.1 | disease resistance protein, putative, expressed                                                 | Chr1  | 33816618 | 33821133 - | 4  | 3112 | 6.40 |
| LOC_Os02g03820.1 | expressed protein                                                                               | Chr2  | 1603358  | 1607212 +  | 5  | 2340 | 6.40 |
| LOC_Os03g54063.3 | expressed protein                                                                               | Chr3  | 30994449 | 30996825 - | 3  | 1341 | 6.40 |
| LOC_Os01g37837.3 | seryl-tRNA synthetase, putative, expressed                                                      | Chr1  | 21175744 | 21178471 + | 5  | 1219 | 6.40 |
| LOC_Os01g57854.1 | pectinesterase, putative, expressed                                                             | Chr1  | 33453433 | 33460087 + | 2  | 1933 | 6.40 |
| LOC_Os03g16220.1 | oxidoreductase, short chain dehydrogenase/reductase family domain containing protein, expressed | Chr3  | 8945063  | 8947981 -  | 5  | 1490 | 6.40 |
| LOC_Os02g19440.1 | sirohochlorin ferrochelataase, putative, expressed                                              | Chr2  | 11353281 | 11357740 - | 7  | 1632 | 6.40 |
| LOC_Os01g53700.1 | mitochondrial-processing peptidase subunit, mitochondrial precursor, putative, expressed        | Chr1  | 30850589 | 30856227 - | 13 | 2518 | 6.40 |
| LOC_Os01g67190.1 | ribonuclease T2 family domain containing protein, expressed                                     | Chr1  | 38994469 | 38997523 - | 8  | 1493 | 6.40 |
| LOC_Os06g30940.1 | pentatricopeptide, putative, expressed                                                          | Chr6  | 17997701 | 18000860 + | 3  | 3051 | 6.40 |
| LOC_Os02g09380.1 | expressed protein                                                                               | Chr2  | 4820464  | 4822685 +  | 5  | 1323 | 6.41 |
| LOC_Os05g45770.2 | Divergent PAP2 family domain containing protein, expressed                                      | Chr5  | 26507606 | 26510057 + | 1  | 2484 | 6.41 |
| LOC_Os07g01200.1 | tetraacyldisaccharide 4-kinase, putative, expressed                                             | Chr7  | 115439   | 118055 -   | 5  | 2121 | 6.41 |
| LOC_Os11g03460.1 | Mad3/BUB1 homology region 1 domain containing protein, expressed                                | Chr11 | 1325459  | 1328968 -  | 5  | 2632 | 6.41 |

|                  |                                                                                                  |       |          |            |    |      |      |
|------------------|--------------------------------------------------------------------------------------------------|-------|----------|------------|----|------|------|
| LOC_Os04g58504.1 | choline transporter-related, putative, expressed                                                 | Chr4  | 34791847 | 34800755 - | 10 | 2783 | 6.41 |
| LOC_Os01g51700.2 | ras-related protein, putative, expressed                                                         | Chr1  | 29730128 | 29735102 - | 6  | 1624 | 6.41 |
| LOC_Os01g72020.2 | BTBA3 - Bric-a-Brac, Tramtrack, Broad Complex BTB domain with Ankyrin repeat region, expressed   | Chr1  | 41741486 | 41744666 - | 2  | 2019 | 6.41 |
| LOC_Os08g37650.1 | expressed protein                                                                                | Chr8  | 23850361 | 23852920 - | 3  | 1474 | 6.41 |
| LOC_Os02g54900.1 | STE_PAK_Ste20_STLK.2 - STE kinases include homologs to sterile 7, sterile 11 and sterile 20 from | Chr2  | 33623756 | 33630043 + | 19 | 3606 | 6.41 |
| LOC_Os03g54091.1 | OsTOP6A1 - Topoisomerase 6 subunit A homolog 1, expressed                                        | Chr3  | 31009978 | 31013940 + | 15 | 1879 | 6.41 |
| LOC_Os02g44599.3 | expressed protein                                                                                | Chr2  | 27022924 | 27028418 - | 6  | 3575 | 6.41 |
| LOC_Os04g58180.1 | WD-40 repeat family protein, putative, expressed                                                 | Chr4  | 34649540 | 34655216 + | 7  | 3252 | 6.42 |
| LOC_Os02g48400.1 | expressed protein                                                                                | Chr2  | 29635857 | 29639351 + | 7  | 1621 | 6.42 |
| LOC_Os02g04260.1 | expressed protein                                                                                | Chr2  | 1878983  | 1882476 -  | 6  | 1754 | 6.42 |
| LOC_Os01g39600.2 | expressed protein                                                                                | Chr1  | 22337346 | 22341545 - | 3  | 3620 | 6.42 |
| LOC_Os12g40440.1 | expressed protein                                                                                | Chr12 | 25027023 | 25029724 - | 1  | 2734 | 6.42 |
| LOC_Os11g07230.2 | receptor kinase, putative, expressed                                                             | Chr11 | 3634792  | 3638663 +  | 4  | 3714 | 6.42 |
| LOC_Os11g07230.3 | receptor kinase, putative, expressed                                                             | Chr11 | 3634792  | 3638663 +  | 4  | 3745 | 6.42 |
| LOC_Os12g01574.1 | expressed protein                                                                                | Chr12 | 346323   | 350645 -   | 4  | 1019 | 6.42 |
| LOC_Os11g34810.1 | expressed protein                                                                                | Chr11 | 20390259 | 20392226 - | 2  | 1654 | 6.42 |
| LOC_Os04g47480.1 | DUF630/DUF632 domains containing protein, putative, expressed                                    | Chr4  | 28170285 | 28174275 + | 5  | 2795 | 6.42 |
| LOC_Os03g05334.1 | expressed protein                                                                                | Chr3  | 2608931  | 2609586 +  | 1  | 688  | 6.43 |
| LOC_Os03g51430.2 | SEC14 cytosolic factor family protein, putative, expressed                                       | Chr3  | 29421116 | 29425439 + | 6  | 1623 | 6.43 |
| LOC_Os03g51430.1 | SEC14 cytosolic factor family protein, putative, expressed                                       | Chr3  | 29421116 | 29425439 + | 6  | 1604 | 6.43 |
| LOC_Os05g31680.1 | expressed protein                                                                                | Chr5  | 18433311 | 18437696 + | 6  | 1911 | 6.43 |
| LOC_Os09g32660.1 | expressed protein                                                                                | Chr9  | 19478653 | 19482093 - | 5  | 2063 | 6.43 |
| LOC_Os01g66730.1 | exosome complex exonuclease RRP40, putative, expressed                                           | Chr1  | 38755058 | 38759513 - | 11 | 1630 | 6.43 |
| LOC_Os04g42174.2 | expressed protein                                                                                | Chr4  | 24962835 | 24966545 + | 4  | 1387 | 6.43 |
| LOC_Os01g06900.1 | verticillium wilt disease resistance protein Ve2, putative, expressed                            | Chr1  | 3272839  | 3276416 +  | 3  | 3189 | 6.43 |
| LOC_Os01g16960.1 | pyruvate kinase, putative, expressed                                                             | Chr1  | 9694027  | 9699817 -  | 3  | 2541 | 6.43 |
| LOC_Os03g61640.1 | ZOS3-23 - C2H2 zinc finger protein, expressed                                                    | Chr3  | 34941602 | 34944655 + | 11 | 1606 | 6.43 |
| LOC_Os01g41040.1 | SCF apoptosis response protein, putative, expressed                                              | Chr1  | 23240045 | 23241815 + | 5  | 931  | 6.43 |
| LOC_Os05g19150.1 | hydrolase, alpha/beta fold family domain containing protein, expressed                           | Chr5  | 11114500 | 11116333 - | 3  | 1389 | 6.43 |
| LOC_Os02g07040.1 | biotin--protein ligase, putative, expressed                                                      | Chr2  | 3607089  | 3610234 +  | 9  | 1814 | 6.43 |
| LOC_Os02g07040.2 | biotin--protein ligase, putative, expressed                                                      | Chr2  | 3607089  | 3610234 +  | 9  | 1831 | 6.43 |
| LOC_Os03g48300.1 | histidine acid phosphatase, putative, expressed                                                  | Chr3  | 27487158 | 27503964 + | 30 | 4646 | 6.43 |
| LOC_Os09g08660.1 | 4-nitrophenylphosphatase, putative, expressed                                                    | Chr9  | 4534955  | 4543655 -  | 11 | 2021 | 6.44 |
| LOC_Os08g04460.2 | NADPH-dependent FMN reductase domain containing protein, expressed                               | Chr8  | 2182687  | 2184807 -  | 4  | 1133 | 6.44 |
| LOC_Os07g23169.2 | methyltransferase, putative, expressed                                                           | Chr7  | 13064445 | 13068285 - | 6  | 1572 | 6.44 |
| LOC_Os04g03860.1 | expressed protein                                                                                | Chr4  | 1754439  | 1759865 +  | 11 | 3696 | 6.44 |
| LOC_Os01g70960.1 | cytochrome c1-1, heme protein, mitochondrial precursor, putative, expressed                      | Chr1  | 41074436 | 41079312 + | 8  | 1753 | 6.44 |
| LOC_Os10g22730.3 | expressed protein                                                                                | Chr10 | 11807240 | 11813233 - | 12 | 2645 | 6.44 |
| LOC_Os01g70110.1 | No apical meristem protein, putative, expressed                                                  | Chr1  | 40572819 | 40574020 + | 2  | 1173 | 6.44 |
| LOC_Os02g10630.1 | GRAM and C2 domains containing protein, putative, expressed                                      | Chr2  | 5586939  | 5593645 -  | 10 | 4275 | 6.44 |
| LOC_Os04g41150.1 | DUF565 domain containing protein, putative, expressed                                            | Chr4  | 24402658 | 24405107 + | 2  | 1522 | 6.44 |
| LOC_Os02g39410.3 | protein phosphatase 2C, putative, expressed                                                      | Chr2  | 23776248 | 23780985 - | 9  | 3345 | 6.44 |
| LOC_Os09g28480.1 | expressed protein                                                                                | Chr9  | 17324424 | 17329001 + | 3  | 2736 | 6.44 |
| LOC_Os12g40890.1 | OslAA30 - Auxin-responsive Aux/IAA gene family member, expressed                                 | Chr12 | 25310812 | 25316229 - | 5  | 1864 | 6.44 |
| LOC_Os10g40020.1 | oxidoreductase, short chain dehydrogenase/reductase family domain containing family, expressed   | Chr10 | 21434984 | 21439378 - | 11 | 2780 | 6.44 |

|                  |                                                                                                |       |          |            |    |      |      |
|------------------|------------------------------------------------------------------------------------------------|-------|----------|------------|----|------|------|
| LOC_Os03g05040.1 | expressed protein                                                                              | Chr3  | 2450608  | 2455276 -  | 7  | 3041 | 6.44 |
| LOC_Os11g02460.3 | outer membrane protein, OMP85 family, putative, expressed                                      | Chr11 | 739096   | 742792 -   | 8  | 2519 | 6.44 |
| LOC_Os02g39410.2 | protein phosphatase 2C, putative, expressed                                                    | Chr2  | 23776248 | 23782298 - | 10 | 4017 | 6.44 |
| LOC_Os01g59340.2 | dihydropyrimidinase, putative, expressed                                                       | Chr1  | 34295721 | 34305980 + | 16 | 2956 | 6.45 |
| LOC_Os08g17650.1 | LYR motif containing protein, putative, expressed                                              | Chr8  | 10795822 | 10803842 - | 3  | 930  | 6.45 |
| LOC_Os02g43600.1 | 50S ribosomal protein L19, chloroplast precursor, putative, expressed                          | Chr2  | 26317494 | 26320435 - | 4  | 1157 | 6.45 |
| LOC_Os09g09980.1 | glucan endo-1,3-beta-glucosidase precursor, putative, expressed                                | Chr9  | 5430895  | 5433234 +  | 2  | 1907 | 6.45 |
| LOC_Os03g53880.3 | serine/threonine-protein kinase TOUSLED, putative, expressed                                   | Chr3  | 30893636 | 30899911 - | 12 | 2478 | 6.45 |
| LOC_Os01g59340.1 | dihydropyrimidinase, putative, expressed                                                       | Chr1  | 34295651 | 34305980 + | 16 | 3156 | 6.45 |
| LOC_Os02g50680.2 | AAA-type ATPase family protein, putative, expressed                                            | Chr2  | 30960020 | 30965278 - | 11 | 2466 | 6.45 |
| LOC_Os02g50680.3 | AAA-type ATPase family protein, putative, expressed                                            | Chr2  | 30960020 | 30965278 - | 11 | 2454 | 6.45 |
| LOC_Os09g26840.1 | expressed protein                                                                              | Chr9  | 16307780 | 16310837 - | 6  | 1474 | 6.45 |
| LOC_Os08g09210.2 | phosphoribosylamine--glycine ligase, putative, expressed                                       | Chr8  | 5341430  | 5345421 +  | 5  | 2475 | 6.45 |
| LOC_Os08g09210.1 | phosphoribosylamine--glycine ligase, putative, expressed                                       | Chr8  | 5341430  | 5345421 +  | 5  | 2480 | 6.45 |
| LOC_Os06g11600.2 | growth regulator related protein, putative, expressed                                          | Chr6  | 6146721  | 6150348 +  | 10 | 1959 | 6.45 |
| LOC_Os04g35620.1 | expressed protein                                                                              | Chr4  | 21706459 | 21710960 - | 8  | 958  | 6.45 |
| LOC_Os06g48940.1 | GHMP kinases ATP-binding protein, putative, expressed                                          | Chr6  | 29626216 | 29634689 + | 29 | 4654 | 6.45 |
| LOC_Os06g41590.2 | YIF1B, putative, expressed                                                                     | Chr6  | 24917130 | 24920283 - | 5  | 1529 | 6.46 |
| LOC_Os06g41590.1 | YIF1B, putative, expressed                                                                     | Chr6  | 24917130 | 24920288 - | 5  | 1538 | 6.46 |
| LOC_Os06g41590.3 | YIF1B, putative, expressed                                                                     | Chr6  | 24917130 | 24920283 - | 5  | 1552 | 6.46 |
| LOC_Os04g52100.1 | peptidase, M24 family protein, putative, expressed                                             | Chr4  | 30945118 | 30948691 - | 10 | 1756 | 6.46 |
| LOC_Os11g37300.1 | OsFBDUF53 - F-box and DUF domain containing protein, expressed                                 | Chr11 | 22025760 | 22029748 + | 3  | 3445 | 6.46 |
| LOC_Os02g04810.1 | auxin response factor 5, putative, expressed                                                   | Chr2  | 2207419  | 2214632 -  | 14 | 4470 | 6.46 |
| LOC_Os02g53340.2 | cyclic nucleotide-gated ion channel, putative, expressed                                       | Chr2  | 32648606 | 32659775 + | 13 | 3152 | 6.46 |
| LOC_Os04g55090.1 | PPR repeat domain containing protein, putative, expressed                                      | Chr4  | 32758857 | 32762453 + | 3  | 2876 | 6.47 |
| LOC_Os04g55090.2 | PPR repeat domain containing protein, putative, expressed                                      | Chr4  | 32758857 | 32762453 + | 3  | 2881 | 6.47 |
| LOC_Os11g07230.1 | receptor kinase, putative, expressed                                                           | Chr11 | 3633303  | 3638605 +  | 5  | 4106 | 6.47 |
| LOC_Os01g48910.2 | AMP-binding enzyme, putative, expressed                                                        | Chr1  | 28060410 | 28067159 - | 21 | 3115 | 6.47 |
| LOC_Os02g44599.1 | expressed protein                                                                              | Chr2  | 27022924 | 27028416 - | 4  | 3891 | 6.47 |
| LOC_Os07g45300.1 | tim44-like domain containing protein, expressed                                                | Chr7  | 27030234 | 27035093 - | 13 | 1478 | 6.47 |
| LOC_Os07g38220.1 | expressed protein                                                                              | Chr7  | 22920993 | 22922478 + | 1  | 1518 | 6.47 |
| LOC_Os07g06410.3 | deoxyribonuclease tatD, putative, expressed                                                    | Chr7  | 3111635  | 3113960 +  | 8  | 1239 | 6.47 |
| LOC_Os07g06410.4 | deoxyribonuclease tatD, putative, expressed                                                    | Chr7  | 3111635  | 3113948 +  | 7  | 1308 | 6.47 |
| LOC_Os02g56020.2 | methyltransferase, putative, expressed                                                         | Chr2  | 34296967 | 34299423 + | 7  | 1311 | 6.47 |
| LOC_Os07g45620.1 | retrotransposon protein, putative, Ty3-gypsy subclass, expressed                               | Chr7  | 27233092 | 27243299 + | 11 | 4972 | 6.47 |
| LOC_Os02g27620.2 | endonuclease/exonuclease/phosphatase family domain containing protein, expressed               | Chr2  | 16360083 | 16364429 - | 8  | 2999 | 6.48 |
| LOC_Os09g33620.1 | Leucine Rich Repeat domain containing protein, expressed                                       | Chr9  | 19854293 | 19857385 - | 5  | 1687 | 6.48 |
| LOC_Os05g02970.1 | expressed protein                                                                              | Chr5  | 1103397  | 1105229 +  | 5  | 980  | 6.48 |
| LOC_Os11g05120.1 | expressed protein                                                                              | Chr11 | 2245045  | 2247217 -  | 3  | 1091 | 6.48 |
| LOC_Os01g61620.1 | protein kinase family protein, putative, expressed                                             | Chr1  | 35653186 | 35658406 + | 8  | 3049 | 6.48 |
| LOC_Os11g02460.1 | outer membrane protein, OMP85 family, putative, expressed                                      | Chr11 | 737421   | 742792 -   | 9  | 2733 | 6.48 |
| LOC_Os11g02460.2 | outer membrane protein, OMP85 family, putative, expressed                                      | Chr11 | 737419   | 742792 -   | 9  | 2787 | 6.48 |
| LOC_Os05g09400.2 | 30S ribosomal protein S31, chloroplast precursor, putative, expressed                          | Chr5  | 5274199  | 5277765 -  | 4  | 855  | 6.48 |
| LOC_Os04g54740.1 | expressed protein                                                                              | Chr4  | 32552399 | 32556341 + | 2  | 3741 | 6.48 |
| LOC_Os01g72020.1 | BTBA3 - Bric-a-Brac, Tramtrack, Broad Complex BTB domain with Ankyrin repeat region, expressed | Chr1  | 41741160 | 41744666 - | 2  | 2348 | 6.48 |



|                  |                                                                                                 |       |          |            |    |      |      |
|------------------|-------------------------------------------------------------------------------------------------|-------|----------|------------|----|------|------|
| LOC_Os04g41910.1 | RNA recognition motif containing protein, putative, expressed                                   | Chr4  | 24834401 | 24839784 + | 13 | 2372 | 6.48 |
| LOC_Os02g44599.2 | expressed protein                                                                               | Chr2  | 27022924 | 27028416 - | 3  | 4013 | 6.48 |
| LOC_Os03g07420.1 | 3-dehydroquinate synthase, putative, expressed                                                  | Chr3  | 3763798  | 3767232 +  | 10 | 1822 | 6.48 |
| LOC_Os01g50960.1 | RNA polymerase II transcriptional coactivator KELP, putative, expressed                         | Chr1  | 29280126 | 29282901 - | 3  | 1240 | 6.48 |
| LOC_Os01g03500.1 | expressed protein                                                                               | Chr1  | 1410987  | 1413093 -  | 2  | 1322 | 6.48 |
| LOC_Os06g49920.1 | expressed protein                                                                               | Chr6  | 30221418 | 30223862 + | 4  | 2076 | 6.48 |
| LOC_Os03g47610.1 | thiamine biosynthesis protein thiC, putative, expressed                                         | Chr3  | 26952048 | 26957733 + | 6  | 2425 | 6.48 |
| LOC_Os10g19334.1 | alpha-1,2-fucosidase, putative, expressed                                                       | Chr10 | 9861144  | 9868032 -  | 10 | 3303 | 6.48 |
| LOC_Os02g56020.1 | methyltransferase, putative, expressed                                                          | Chr2  | 34296373 | 34299423 + | 9  | 1792 | 6.48 |
| LOC_Os02g13304.1 | expressed protein                                                                               | Chr2  | 7088833  | 7089730 -  | 1  | 930  | 6.48 |
| LOC_Os01g59160.1 | UBA/TS-N domain containing protein, expressed                                                   | Chr1  | 34175921 | 34179798 - | 8  | 1507 | 6.48 |
| LOC_Os03g17164.1 | kinesin-related protein, putative, expressed                                                    | Chr3  | 9546132  | 9550718 +  | 18 | 3024 | 6.48 |
| LOC_Os12g33240.1 | mitochondrial ribosomal protein S10, putative, expressed                                        | Chr12 | 20105725 | 20108020 + | 1  | 2328 | 6.48 |
| LOC_Os01g15979.1 | gb protein, putative, expressed                                                                 | Chr1  | 8988867  | 8992581 +  | 6  | 1041 | 6.48 |
| LOC_Os03g27030.2 | RNA recognition motif containing protein, expressed                                             | Chr3  | 15475271 | 15478270 - | 8  | 1394 | 6.49 |
| LOC_Os03g27030.1 | RNA recognition motif containing protein, expressed                                             | Chr3  | 15475272 | 15478270 - | 8  | 1396 | 6.49 |
| LOC_Os09g23380.1 | metallo-beta-lactamase, putative, expressed                                                     | Chr9  | 13891777 | 13897441 + | 13 | 2557 | 6.49 |
| LOC_Os06g06880.1 | Ser/Thr protein phosphatase family protein, putative, expressed                                 | Chr6  | 3263799  | 3267308 -  | 3  | 1950 | 6.49 |
| LOC_Os03g60800.1 | transposon protein, putative, unclassified, expressed                                           | Chr3  | 34541557 | 34546151 + | 5  | 3939 | 6.49 |
| LOC_Os03g10990.1 | retinoblastoma-binding protein-like, putative, expressed                                        | Chr3  | 5646147  | 5650212 -  | 5  | 2556 | 6.49 |
| LOC_Os02g52900.2 | glutaredoxin 2, putative, expressed                                                             | Chr2  | 32349092 | 32352908 + | 3  | 3719 | 6.49 |
| LOC_Os03g16220.2 | oxidoreductase, short chain dehydrogenase/reductase family domain containing protein, expressed | Chr3  | 8945110  | 8947981 -  | 5  | 1580 | 6.49 |
| LOC_Os12g37710.1 | PsbP, putative, expressed                                                                       | Chr12 | 23148278 | 23157669 + | 3  | 1671 | 6.49 |
| LOC_Os12g37710.2 | PsbP, putative, expressed                                                                       | Chr12 | 23148319 | 23157669 + | 2  | 1753 | 6.49 |
| LOC_Os03g48300.3 | histidine acid phosphatase, putative, expressed                                                 | Chr3  | 27487161 | 27501225 + | 24 | 3486 | 6.49 |
| LOC_Os09g32240.2 | OsFBX332 - F-box domain containing protein, expressed                                           | Chr9  | 19241002 | 19244410 - | 6  | 1190 | 6.49 |
| LOC_Os04g57500.1 | phosphatidate cytidyltransferase, putative, expressed                                           | Chr4  | 34209234 | 34211093 + | 6  | 1296 | 6.50 |
| LOC_Os02g07260.1 | phosphoglycerate kinase protein, putative, expressed                                            | Chr2  | 3727494  | 3731349 +  | 7  | 1955 | 6.50 |
| LOC_Os02g07260.3 | phosphoglycerate kinase protein, putative, expressed                                            | Chr2  | 3727494  | 3731349 +  | 6  | 2005 | 6.50 |
| LOC_Os02g07260.2 | phosphoglycerate kinase protein, putative, expressed                                            | Chr2  | 3727494  | 3731349 +  | 6  | 2033 | 6.50 |
| LOC_Os08g05530.1 | LSM domain containing protein, expressed                                                        | Chr8  | 2965358  | 2968015 +  | 5  | 496  | 6.50 |
| LOC_Os01g52400.2 | bacterial transferase hexapeptide domain containing protein, expressed                          | Chr1  | 30102785 | 30107361 + | 11 | 2057 | 6.50 |
| LOC_Os01g52400.1 | bacterial transferase hexapeptide domain containing protein, expressed                          | Chr1  | 30102785 | 30107361 + | 11 | 2081 | 6.50 |
| LOC_Os06g20370.1 | microtubule associated protein, putative, expressed                                             | Chr6  | 11696837 | 11701293 + | 10 | 2692 | 6.50 |
| LOC_Os09g13575.1 | expressed protein                                                                               | Chr9  | 7872377  | 7873255 +  | 2  | 526  | 6.50 |
| LOC_Os01g58750.1 | expressed protein                                                                               | Chr1  | 33956754 | 33960102 - | 3  | 1626 | 6.50 |
| LOC_Os01g57480.1 | serine/threonine-protein kinase receptor precursor, putative, expressed                         | Chr1  | 33210230 | 33216333 + | 9  | 3755 | 6.50 |
| LOC_Os02g42230.1 | RPA2B - Putative single-stranded DNA binding complex subunit 2, expressed                       | Chr2  | 25404409 | 25408368 - | 10 | 1696 | 6.50 |
| LOC_Os07g06670.1 | OsFBL35 - F-box domain and LRR containing protein, expressed                                    | Chr7  | 3251100  | 3255281 +  | 6  | 1713 | 6.50 |
| LOC_Os03g21600.2 | expressed protein                                                                               | Chr3  | 12334481 | 12337463 - | 5  | 1912 | 6.50 |
| LOC_Os03g17600.1 | expressed protein                                                                               | Chr3  | 9788873  | 9791862 +  | 9  | 1220 | 6.50 |
| LOC_Os07g32350.2 | WD domain, G-beta repeat domain containing protein, expressed                                   | Chr7  | 19231648 | 19236044 - | 11 | 2828 | 6.50 |
| LOC_Os02g09790.1 | disease resistance protein RPM1, putative, expressed                                            | Chr2  | 5048656  | 5052503 -  | 1  | 3880 | 6.50 |
| LOC_Os12g40790.1 | zinc finger family protein, putative, expressed                                                 | Chr12 | 25247706 | 25253948 - | 6  | 3948 | 6.50 |
| LOC_Os01g68830.1 | expressed protein                                                                               | Chr1  | 39991966 | 39995113 + | 2  | 2332 | 6.51 |

|                  |                                                                           |       |          |            |    |      |      |
|------------------|---------------------------------------------------------------------------|-------|----------|------------|----|------|------|
| LOC_Os01g58680.1 | apurinic endonuclease-redox protein, putative, expressed                  | Chr1  | 33919393 | 33924664 + | 12 | 2396 | 6.51 |
| LOC_Os07g40460.3 | prefoldin, putative, expressed                                            | Chr7  | 24244101 | 24247474 + | 5  | 1280 | 6.51 |
| LOC_Os07g40460.1 | prefoldin, putative, expressed                                            | Chr7  | 24243946 | 24247474 + | 5  | 1409 | 6.51 |
| LOC_Os01g15399.1 | expressed protein                                                         | Chr1  | 8630317  | 8633592 -  | 5  | 2780 | 6.51 |
| LOC_Os11g09350.1 | expressed protein                                                         | Chr11 | 5010064  | 5013658 -  | 2  | 1890 | 6.51 |
| LOC_Os07g39070.1 | 5-formyltetrahydrofolate cyclo-ligase, putative, expressed                | Chr7  | 23419018 | 23422454 + | 7  | 1305 | 6.51 |
| LOC_Os02g34840.1 | RNA polymerase II transcriptional coactivator KIWI, putative, expressed   | Chr2  | 20884273 | 20886517 + | 4  | 861  | 6.51 |
| LOC_Os03g44530.2 | GTPase of unknown function domain containing protein, putative, expressed | Chr3  | 25063106 | 25066824 - | 7  | 2347 | 6.51 |
| LOC_Os07g27350.1 | atuA, putative, expressed                                                 | Chr7  | 15912872 | 15917899 + | 14 | 2980 | 6.51 |
| LOC_Os02g53340.1 | cyclic nucleotide-gated ion channel, putative, expressed                  | Chr2  | 32648606 | 32659777 + | 14 | 3250 | 6.51 |
| LOC_Os09g32240.1 | OsFBX332 - F-box domain containing protein, expressed                     | Chr9  | 19241002 | 19244486 - | 5  | 1317 | 6.51 |
| LOC_Os06g40030.1 | S-locus-like receptor protein kinase, putative, expressed                 | Chr6  | 23812298 | 23815104 - | 1  | 2839 | 6.52 |
| LOC_Os05g43530.1 | CSLC7 - cellulose synthase-like family C, expressed                       | Chr5  | 25300749 | 25304668 - | 5  | 2811 | 6.52 |
| LOC_Os05g48230.1 | expressed protein                                                         | Chr5  | 27643114 | 27647843 + | 15 | 2398 | 6.52 |
| LOC_Os01g67370.4 | expressed protein                                                         | Chr1  | 39131909 | 39134858 - | 8  | 1331 | 6.52 |
| LOC_Os09g24670.1 | CAAX amino terminal protease family protein, putative, expressed          | Chr9  | 14680807 | 14684519 + | 10 | 1648 | 6.52 |
| LOC_Os03g56320.3 | expressed protein                                                         | Chr3  | 32107038 | 32110407 + | 7  | 2270 | 6.52 |
| LOC_Os08g37650.2 | expressed protein                                                         | Chr8  | 23850361 | 23852873 - | 1  | 2545 | 6.52 |
| LOC_Os11g10990.1 | heat shock protein DnaJ, putative, expressed                              | Chr11 | 6064996  | 6066797 -  | 2  | 1426 | 6.53 |
| LOC_Os06g03690.1 | RNA recognition motif containing protein, putative, expressed             | Chr6  | 1455368  | 1458610 +  | 7  | 1450 | 6.53 |
| LOC_Os10g06700.1 | OsFBX375 - F-box domain containing protein, expressed                     | Chr10 | 3468006  | 3469320 +  | 1  | 1347 | 6.53 |
| LOC_Os08g04840.2 | MYB family transcription factor, putative, expressed                      | Chr8  | 2433787  | 2436913 +  | 3  | 1685 | 6.53 |
| LOC_Os07g05560.1 | expressed protein                                                         | Chr7  | 2599062  | 2600840 -  | 1  | 1811 | 6.53 |
| LOC_Os02g35750.3 | pentatricopeptide repeat domain containing protein, putative, expressed   | Chr2  | 21472360 | 21475633 + | 3  | 1733 | 6.53 |
| LOC_Os03g44530.1 | GTPase of unknown function domain containing protein, putative, expressed | Chr3  | 25062638 | 25066824 - | 8  | 2418 | 6.53 |
| LOC_Os03g44580.2 | DNA binding protein, putative, expressed                                  | Chr3  | 25102497 | 25104599 - | 2  | 1725 | 6.53 |
| LOC_Os09g32410.1 | OsFBX333 - F-box domain containing protein, expressed                     | Chr9  | 19352404 | 19357059 - | 5  | 3022 | 6.53 |
| LOC_Os02g01030.3 | tetratricopeptide repeat domain containing protein, expressed             | Chr2  | 14061    | 16803 +    | 10 | 1701 | 6.53 |
| LOC_Os07g04860.1 | transposon protein, putative, unclassified, expressed                     | Chr7  | 2140732  | 2143984 -  | 3  | 2707 | 6.53 |
| LOC_Os10g34420.1 | lysM domain containing protein, putative, expressed                       | Chr10 | 18357335 | 18359936 + | 3  | 1860 | 6.53 |
| LOC_Os02g45090.2 | expressed protein                                                         | Chr2  | 27352986 | 27357013 - | 6  | 1730 | 6.53 |
| LOC_Os01g67720.4 | ABC1 family domain containing protein, putative, expressed                | Chr1  | 39359392 | 39362884 - | 7  | 1713 | 6.53 |
| LOC_Os07g43350.1 | expressed protein                                                         | Chr7  | 25945919 | 25950562 - | 3  | 3729 | 6.53 |
| LOC_Os03g63490.1 | pantoate--beta-alanine ligase, putative, expressed                        | Chr3  | 35865184 | 35867788 + | 4  | 1379 | 6.53 |
| LOC_Os12g38650.1 | expressed protein                                                         | Chr12 | 23737322 | 23739415 + | 2  | 229  | 6.53 |
| LOC_Os11g08660.1 | TOPBP1A - Similar to DNA replication protein TOPBP1 from, expressed       | Chr11 | 4614156  | 4622265 +  | 16 | 3561 | 6.53 |
| LOC_Os02g07240.1 | expressed protein                                                         | Chr2  | 3718309  | 3720155 -  | 4  | 1144 | 6.53 |
| LOC_Os02g51830.1 | tRNA synthetase class II core domain containing protein, expressed        | Chr2  | 31748768 | 31754456 - | 11 | 2735 | 6.54 |
| LOC_Os10g22730.1 | expressed protein                                                         | Chr10 | 11807240 | 11813233 - | 11 | 2333 | 6.54 |
| LOC_Os01g41550.1 | aspartic proteinase, putative, expressed                                  | Chr1  | 23515004 | 23516896 + | 1  | 1925 | 6.54 |
| LOC_Os04g47860.3 | ZOS4-11 - C2H2 zinc finger protein, expressed                             | Chr4  | 28408733 | 28416018 + | 5  | 3349 | 6.54 |
| LOC_Os04g47860.6 | ZOS4-11 - C2H2 zinc finger protein, expressed                             | Chr4  | 28408775 | 28416032 + | 3  | 3503 | 6.54 |
| LOC_Os04g47860.2 | ZOS4-11 - C2H2 zinc finger protein, expressed                             | Chr4  | 28408775 | 28416032 + | 3  | 3506 | 6.54 |
| LOC_Os04g47860.1 | ZOS4-11 - C2H2 zinc finger protein, expressed                             | Chr4  | 28408775 | 28416032 + | 3  | 3525 | 6.54 |
| LOC_Os04g40420.1 | SWIRM domain containing protein, expressed                                | Chr4  | 24021401 | 24026205 + | 7  | 2661 | 6.54 |

|                  |                                                                                    |       |          |            |    |      |      |
|------------------|------------------------------------------------------------------------------------|-------|----------|------------|----|------|------|
| LOC_Os03g55040.1 | UDP-glucuronosyl and UDP-glucosyl transferase domain containing protein, expressed | Chr3  | 31298866 | 31301009 + | 2  | 2066 | 6.54 |
| LOC_Os04g43430.3 | pentatricopeptide, putative, expressed                                             | Chr4  | 25703701 | 25707426 - | 2  | 3660 | 6.54 |
| LOC_Os12g02750.2 | expressed protein                                                                  | Chr12 | 971331   | 972914 +   | 4  | 1306 | 6.54 |
| LOC_Os07g12320.1 | WD domain, G-beta repeat domain containing protein, expressed                      | Chr7  | 6949934  | 6952170 +  | 1  | 2269 | 6.54 |
| LOC_Os01g15399.2 | expressed protein                                                                  | Chr1  | 8630317  | 8633592 -  | 5  | 2888 | 6.54 |
| LOC_Os02g52270.1 | heat shock protein DnaJ, putative, expressed                                       | Chr2  | 32001646 | 32003856 - | 5  | 984  | 6.54 |
| LOC_Os08g33650.2 | SET domain-containing protein, putative, expressed                                 | Chr8  | 21014458 | 21018732 + | 2  | 1494 | 6.54 |
| LOC_Os03g22350.1 | Brix domain containing protein, putative, expressed                                | Chr3  | 12802141 | 12805154 + | 7  | 1763 | 6.54 |
| LOC_Os01g65400.1 | DNA polymerase I, putative, expressed                                              | Chr1  | 37956305 | 37958989 - | 6  | 1985 | 6.54 |
| LOC_Os10g22730.2 | expressed protein                                                                  | Chr10 | 11807240 | 11813233 - | 11 | 2728 | 6.54 |
| LOC_Os10g22730.4 | expressed protein                                                                  | Chr10 | 11807240 | 11813233 - | 11 | 2719 | 6.54 |
| LOC_Os08g10350.1 | integral membrane family protein, putative, expressed                              | Chr8  | 6062772  | 6065393 -  | 2  | 2063 | 6.54 |
| LOC_Os01g68104.1 | ZOS1-21 - C2H2 zinc finger protein, expressed                                      | Chr1  | 39588269 | 39591239 + | 9  | 1557 | 6.54 |
| LOC_Os04g59610.1 | expressed protein                                                                  | Chr4  | 35443924 | 35446343 + | 4  | 1932 | 6.54 |
| LOC_Os09g28940.1 | ubiquitin carboxyl-terminal hydrolase domain containing protein, expressed         | Chr9  | 17600530 | 17608513 - | 12 | 3198 | 6.55 |
| LOC_Os11g34810.2 | expressed protein                                                                  | Chr11 | 20390250 | 20392226 - | 2  | 1882 | 6.55 |
| LOC_Os10g39460.2 | selenium-binding protein-like, putative, expressed                                 | Chr10 | 21058117 | 21061300 - | 4  | 3004 | 6.55 |
| LOC_Os10g39460.1 | selenium-binding protein-like, putative, expressed                                 | Chr10 | 21058117 | 21061300 - | 3  | 3041 | 6.55 |
| LOC_Os11g38020.1 | GTPase of unknown function domain containing protein, putative, expressed          | Chr11 | 22555514 | 22561050 + | 13 | 2386 | 6.55 |
| LOC_Os10g41310.1 | DUF630/DUF632 domains containing protein, putative, expressed                      | Chr10 | 22198114 | 22202335 - | 4  | 3058 | 6.55 |
| LOC_Os03g16730.1 | expressed protein                                                                  | Chr3  | 9266217  | 9269866 +  | 4  | 1061 | 6.55 |
| LOC_Os03g47980.1 | expressed protein                                                                  | Chr3  | 27276383 | 27282274 - | 11 | 2622 | 6.55 |
| LOC_Os04g11790.1 | OsFBX120 - F-box domain containing protein, expressed                              | Chr4  | 6454582  | 6456042 -  | 1  | 1493 | 6.55 |
| LOC_Os12g02750.4 | expressed protein                                                                  | Chr12 | 971331   | 974796 +   | 5  | 1381 | 6.55 |
| LOC_Os10g38900.1 | erythronate-4-phosphate dehydrogenase, putative, expressed                         | Chr10 | 20725051 | 20731000 + | 7  | 3899 | 6.55 |
| LOC_Os03g40930.1 | expressed protein                                                                  | Chr3  | 22744328 | 22746916 - | 3  | 2141 | 6.55 |
| LOC_Os07g01480.2 | oxygen evolving enhancer protein 3 domain containing protein, expressed            | Chr7  | 306009   | 307555 +   | 2  | 1475 | 6.55 |
| LOC_Os07g01480.1 | oxygen evolving enhancer protein 3 domain containing protein, expressed            | Chr7  | 306009   | 307555 +   | 2  | 1562 | 6.55 |
| LOC_Os02g40010.2 | phosphoribosyl transferase, putative, expressed                                    | Chr2  | 24223305 | 24228766 + | 6  | 1459 | 6.56 |
| LOC_Os02g40010.4 | phosphoribosyl transferase, putative, expressed                                    | Chr2  | 24223305 | 24228766 + | 7  | 1374 | 6.56 |
| LOC_Os02g40010.1 | phosphoribosyl transferase, putative, expressed                                    | Chr2  | 24223305 | 24228766 + | 7  | 1341 | 6.56 |
| LOC_Os02g40010.3 | phosphoribosyl transferase, putative, expressed                                    | Chr2  | 24223305 | 24228766 + | 8  | 1298 | 6.56 |
| LOC_Os04g59610.2 | expressed protein                                                                  | Chr4  | 35443924 | 35446343 + | 4  | 2032 | 6.56 |
| LOC_Os04g59610.3 | expressed protein                                                                  | Chr4  | 35443924 | 35446343 + | 2  | 2162 | 6.56 |
| LOC_Os02g19440.2 | sirohdrochlorin ferrochelatae, putative, expressed                                 | Chr2  | 11353286 | 11357740 - | 5  | 3540 | 6.56 |
| LOC_Os12g02750.3 | expressed protein                                                                  | Chr12 | 971331   | 972978 +   | 4  | 1345 | 6.56 |
| LOC_Os02g53000.1 | lysM domain-containing GPI-anchored protein precursor, putative, expressed         | Chr2  | 32426322 | 32429398 - | 5  | 1746 | 6.56 |
| LOC_Os01g67370.5 | expressed protein                                                                  | Chr1  | 39131909 | 39134858 - | 6  | 1531 | 6.56 |
| LOC_Os08g19470.1 | expressed protein                                                                  | Chr8  | 11630390 | 11631400 + | 6  | 462  | 6.56 |
| LOC_Os07g12140.1 | PPR repeat domain containing protein, putative, expressed                          | Chr7  | 6790686  | 6796612 +  | 3  | 2625 | 6.56 |
| LOC_Os01g65210.1 | proton-dependent oligopeptide transport, putative, expressed                       | Chr1  | 37837137 | 37843664 + | 8  | 2467 | 6.57 |
| LOC_Os02g53000.2 | lysM domain-containing GPI-anchored protein precursor, putative, expressed         | Chr2  | 32426322 | 32429398 - | 3  | 2704 | 6.57 |
| LOC_Os08g41380.1 | pentatricopeptide, putative, expressed                                             | Chr8  | 26134035 | 26137488 + | 2  | 2255 | 6.57 |
| LOC_Os05g32500.2 | expressed protein                                                                  | Chr5  | 18993592 | 18997760 - | 2  | 2903 | 6.57 |
| LOC_Os05g32500.1 | expressed protein                                                                  | Chr5  | 18993316 | 18997760 - | 3  | 3132 | 6.57 |

|                  |                                                                                                 |       |          |            |    |      |      |
|------------------|-------------------------------------------------------------------------------------------------|-------|----------|------------|----|------|------|
| LOC_Os08g11220.7 | expressed protein                                                                               | Chr8  | 6602150  | 6603406 +  | 3  | 707  | 6.57 |
| LOC_Os09g04990.1 | cytoskeletal protein, putative, expressed                                                       | Chr9  | 2685727  | 2688382 +  | 1  | 2688 | 6.57 |
| LOC_Os02g45690.1 | uncharacterized mscS family protein, putative, expressed                                        | Chr2  | 27798048 | 27803943 + | 7  | 2547 | 6.57 |
| LOC_Os01g65400.3 | DNA polymerase I, putative, expressed                                                           | Chr1  | 37955093 | 37958989 - | 6  | 3240 | 6.57 |
| LOC_Os03g06740.1 | glutathione reductase, putative, expressed                                                      | Chr3  | 3427543  | 3432272 +  | 11 | 2512 | 6.57 |
| LOC_Os01g70200.1 | exostosin family domain containing protein, expressed                                           | Chr1  | 40633090 | 40636112 - | 4  | 1932 | 6.57 |
| LOC_Os02g13150.1 | pollen-specific protein SF21, putative, expressed                                               | Chr2  | 7006064  | 7010651 +  | 11 | 2018 | 6.58 |
| LOC_Os11g34980.1 | expressed protein                                                                               | Chr11 | 20501517 | 20503124 - | 3  | 1100 | 6.58 |
| LOC_Os01g36600.1 | PPR repeat domain containing protein, putative, expressed                                       | Chr1  | 20312945 | 20314180 - | 1  | 1268 | 6.58 |
| LOC_Os02g45120.1 | expressed protein                                                                               | Chr2  | 27369109 | 27371822 + | 2  | 764  | 6.58 |
| LOC_Os02g55950.2 | ATMAK10, putative, expressed                                                                    | Chr2  | 34242810 | 34251051 + | 16 | 3023 | 6.58 |
| LOC_Os03g11060.1 | MFP1 attachment factor 1, putative, expressed                                                   | Chr3  | 5686615  | 5687605 +  | 1  | 1023 | 6.58 |
| LOC_Os03g10800.1 | BTBN4 - Bric-a-Brac, Tramtrack, Broad Complex BTB domain with non-phototropic hypocotyl 3 N     | Chr3  | 5530281  | 5534478 +  | 4  | 3317 | 6.58 |
| LOC_Os03g10800.4 | BTBN4 - Bric-a-Brac, Tramtrack, Broad Complex BTB domain with non-phototropic hypocotyl 3 N     | Chr3  | 5530281  | 5534478 +  | 3  | 3513 | 6.58 |
| LOC_Os02g29890.1 | expressed protein                                                                               | Chr2  | 17781040 | 17785549 + | 2  | 3127 | 6.58 |
| LOC_Os06g50910.3 | Phosphatidylinositol kinase and FAT containing domain protein, putative, expressed              | Chr6  | 30802392 | 30815783 - | 18 | 8657 | 6.59 |
| LOC_Os03g02685.1 | lysM domain containing protein, putative, expressed                                             | Chr3  | 1002394  | 1003086 +  | 1  | 725  | 6.59 |
| LOC_Os12g43720.1 | early-responsive to dehydration protein-related, putative, expressed                            | Chr12 | 27154449 | 27160461 - | 12 | 3533 | 6.59 |
| LOC_Os02g55950.1 | ATMAK10, putative, expressed                                                                    | Chr2  | 34242810 | 34251051 + | 16 | 3034 | 6.59 |
| LOC_Os11g36150.1 | receptor-like protein kinase 2 precursor, putative, expressed                                   | Chr11 | 21250855 | 21254683 - | 2  | 3682 | 6.59 |
| LOC_Os03g08700.1 | expressed protein                                                                               | Chr3  | 4482882  | 4489522 +  | 10 | 4292 | 6.59 |
| LOC_Os11g36060.2 | THUMP domain-containing protein, putative, expressed                                            | Chr11 | 21188305 | 21194582 + | 6  | 1595 | 6.59 |
| LOC_Os02g40040.1 | expressed protein                                                                               | Chr2  | 24240087 | 24242558 - | 2  | 852  | 6.59 |
| LOC_Os08g42920.1 | 60S ribosomal protein L7, putative, expressed                                                   | Chr8  | 27127760 | 27129724 + | 4  | 1348 | 6.59 |
| LOC_Os05g31160.1 | peptide chain release factor 2, putative, expressed                                             | Chr5  | 18126349 | 18129661 + | 6  | 1715 | 6.60 |
| LOC_Os05g31160.2 | peptide chain release factor 2, putative, expressed                                             | Chr5  | 18126333 | 18129661 + | 6  | 1738 | 6.60 |
| LOC_Os05g46550.1 | adaptor complexes medium subunit family domain containing protein, expressed                    | Chr5  | 26952574 | 26955950 - | 11 | 2301 | 6.60 |
| LOC_Os06g50910.1 | Phosphatidylinositol kinase and FAT containing domain protein, putative, expressed              | Chr6  | 30797112 | 30815783 - | 18 | 9059 | 6.60 |
| LOC_Os04g57370.1 | acyl-protein thioesterase, putative, expressed                                                  | Chr4  | 34148081 | 34150717 - | 6  | 1386 | 6.60 |
| LOC_Os03g10800.3 | BTBN4 - Bric-a-Brac, Tramtrack, Broad Complex BTB domain with non-phototropic hypocotyl 3 N     | Chr3  | 5528913  | 5534468 +  | 5  | 3678 | 6.60 |
| LOC_Os01g57930.1 | CDP-alcohol phosphatidyltransferase, putative, expressed                                        | Chr1  | 33489285 | 33492959 - | 9  | 1918 | 6.60 |
| LOC_Os01g65400.5 | DNA polymerase I, putative, expressed                                                           | Chr1  | 37955088 | 37958989 - | 5  | 3654 | 6.60 |
| LOC_Os01g65400.4 | DNA polymerase I, putative, expressed                                                           | Chr1  | 37955088 | 37958989 - | 4  | 3720 | 6.60 |
| LOC_Os02g33149.1 | OR, putative, expressed                                                                         | Chr2  | 19714870 | 19717682 - | 8  | 1607 | 6.60 |
| LOC_Os03g19760.1 | HAD-superfamily hydrolase, subfamily IA, variant 3 containing protein, expressed                | Chr3  | 11104620 | 11122447 + | 26 | 4257 | 6.60 |
| LOC_Os04g58600.2 | L-asparaginase precursor protein, putative, expressed                                           | Chr4  | 34839496 | 34843337 + | 10 | 1963 | 6.60 |
| LOC_Os09g18320.1 | bystin, putative, expressed                                                                     | Chr9  | 11236537 | 11240954 - | 10 | 2117 | 6.60 |
| LOC_Os03g16220.3 | oxidoreductase, short chain dehydrogenase/reductase family domain containing protein, expressed | Chr3  | 8945065  | 8947972 -  | 4  | 2139 | 6.60 |
| LOC_Os08g05470.1 | expressed protein                                                                               | Chr8  | 2909609  | 2912538 -  | 5  | 1481 | 6.60 |
| LOC_Os03g37100.1 | DTW domain containing protein, putative, expressed                                              | Chr3  | 20563322 | 20565066 + | 1  | 1777 | 6.60 |
| LOC_Os03g47610.8 | thiamine biosynthesis protein thiC, putative, expressed                                         | Chr3  | 26952048 | 26959200 + | 6  | 3874 | 6.60 |
| LOC_Os07g23210.1 | transposon protein, putative, unclassified, expressed                                           | Chr7  | 13081471 | 13084596 + | 3  | 3037 | 6.60 |
| LOC_Os02g35750.1 | pentatricopeptide repeat domain containing protein, putative, expressed                         | Chr2  | 21471731 | 21473822 + | 1  | 2124 | 6.60 |
| LOC_Os06g46570.1 | galactosyltransferase, putative, expressed                                                      | Chr6  | 28275643 | 28279475 + | 11 | 2098 | 6.60 |
| LOC_Os05g35480.1 | anthranilate phosphoribosyltransferase, putative, expressed                                     | Chr5  | 21080988 | 21084058 - | 1  | 3103 | 6.61 |

|                  |                                                                                                |       |          |            |    |      |      |
|------------------|------------------------------------------------------------------------------------------------|-------|----------|------------|----|------|------|
| LOC_Os10g36350.2 | MSP domain containing protein, putative, expressed                                             | Chr10 | 19415603 | 19418740 - | 9  | 1470 | 6.61 |
| LOC_Os11g47410.1 | retrotransposon protein, putative, unclassified, expressed                                     | Chr11 | 28517380 | 28519357 + | 2  | 1750 | 6.61 |
| LOC_Os08g05650.2 | diacylglycerol kinase, putative, expressed                                                     | Chr8  | 3017356  | 3022026 +  | 8  | 2109 | 6.61 |
| LOC_Os08g05650.1 | diacylglycerol kinase, putative, expressed                                                     | Chr8  | 3017356  | 3022047 +  | 8  | 2137 | 6.61 |
| LOC_Os03g13000.2 | GTP-binding protein, putative, expressed                                                       | Chr3  | 7022844  | 7025908 +  | 4  | 1407 | 6.61 |
| LOC_Os10g19190.1 | vesicle transport protein GOT1B, putative, expressed                                           | Chr10 | 9776976  | 9781629 -  | 7  | 1212 | 6.61 |
| LOC_Os08g39420.2 | uncharacterized protein yeiN, putative, expressed                                              | Chr8  | 24929534 | 24934795 - | 12 | 1780 | 6.61 |
| LOC_Os08g39420.1 | uncharacterized protein yeiN, putative, expressed                                              | Chr8  | 24929534 | 24934795 - | 11 | 1850 | 6.61 |
| LOC_Os03g38790.1 | expressed protein                                                                              | Chr3  | 21541982 | 21544581 + | 3  | 774  | 6.61 |
| LOC_Os05g30920.1 | OsFBX167 - F-box domain containing protein, expressed                                          | Chr5  | 17951299 | 17954234 + | 4  | 1145 | 6.61 |
| LOC_Os01g67370.6 | expressed protein                                                                              | Chr1  | 39131909 | 39134858 - | 5  | 1736 | 6.61 |
| LOC_Os12g42040.1 | OsWAK126 - OsWAK receptor-like protein kinase, expressed                                       | Chr12 | 26073357 | 26076201 + | 3  | 2322 | 6.61 |
| LOC_Os03g15950.1 | enolase, putative, expressed                                                                   | Chr3  | 8800461  | 8805102 -  | 11 | 2280 | 6.61 |
| LOC_Os05g11140.2 | CK1_CaseinKinase_1a.5 - CK1 includes the casein kinase 1 kinases, expressed                    | Chr5  | 6273306  | 6282566 -  | 16 | 3232 | 6.61 |
| LOC_Os01g50970.1 | expressed protein                                                                              | Chr1  | 29285372 | 29288718 + | 4  | 2229 | 6.62 |
| LOC_Os03g40920.1 | expressed protein                                                                              | Chr3  | 22739267 | 22743374 + | 2  | 3007 | 6.62 |
| LOC_Os08g44320.1 | low molecular weight protein-tyrosine-phosphatase slr0328, putative, expressed                 | Chr8  | 27888895 | 27893038 - | 6  | 1343 | 6.62 |
| LOC_Os10g41000.2 | retrotransposon protein, putative, unclassified, expressed                                     | Chr10 | 22015038 | 22019101 - | 7  | 2671 | 6.62 |
| LOC_Os10g36350.1 | MSP domain containing protein, putative, expressed                                             | Chr10 | 19415560 | 19418740 - | 9  | 1469 | 6.62 |
| LOC_Os04g37750.1 | expressed protein                                                                              | Chr4  | 22445324 | 22447425 + | 4  | 1678 | 6.62 |
| LOC_Os08g21330.3 | formamidopyrimidine-DNA glycosylase, putative, expressed                                       | Chr8  | 12710873 | 12719471 + | 9  | 2381 | 6.62 |
| LOC_Os04g57510.1 | exostosin family domain containing protein, expressed                                          | Chr4  | 34209652 | 34214800 - | 4  | 3243 | 6.62 |
| LOC_Os04g57510.2 | exostosin family domain containing protein, expressed                                          | Chr4  | 34209652 | 34214800 - | 4  | 3275 | 6.62 |
| LOC_Os02g10540.1 | ribosomal protein L7/L12 C-terminal domain containing protein, expressed                       | Chr2  | 5550032  | 5552116 -  | 2  | 1324 | 6.62 |
| LOC_Os03g16430.2 | RNA polymerase sigma factor, putative, expressed                                               | Chr3  | 9064856  | 9068078 +  | 7  | 2245 | 6.62 |
| LOC_Os03g16430.1 | RNA polymerase sigma factor, putative, expressed                                               | Chr3  | 9064856  | 9068078 +  | 6  | 2304 | 6.62 |
| LOC_Os04g35240.1 | CAMK_CAMK_like.25 - CAMK includes calcium/calmodulin dependent protein kinases, expressed      | Chr4  | 21414496 | 21419956 + | 9  | 1875 | 6.62 |
| LOC_Os02g48290.1 | thioredoxin reductase 2, putative, expressed                                                   | Chr2  | 29550948 | 29554249 + | 2  | 1567 | 6.62 |
| LOC_Os03g02720.1 | expressed protein                                                                              | Chr3  | 1021458  | 1024672 +  | 3  | 2042 | 6.63 |
| LOC_Os08g21330.1 | formamidopyrimidine-DNA glycosylase, putative, expressed                                       | Chr8  | 12710873 | 12719471 + | 10 | 2473 | 6.63 |
| LOC_Os07g17130.1 | FYVE zinc finger domain containing protein, expressed                                          | Chr7  | 10064207 | 10068023 + | 5  | 2302 | 6.63 |
| LOC_Os11g20790.1 | adenylate kinase, putative, expressed                                                          | Chr11 | 12034629 | 12039479 + | 6  | 1286 | 6.63 |
| LOC_Os08g06020.1 | MSP domain containing protein, expressed                                                       | Chr8  | 3285006  | 3289874 -  | 8  | 1474 | 6.63 |
| LOC_Os05g30920.3 | OsFBX167 - F-box domain containing protein, expressed                                          | Chr5  | 17951299 | 17954255 + | 3  | 1236 | 6.63 |
| LOC_Os06g03690.2 | RNA recognition motif containing protein, putative, expressed                                  | Chr6  | 1455383  | 1458725 +  | 6  | 1623 | 6.63 |
| LOC_Os05g44320.3 | WD domain, G-beta repeat domain containing protein, expressed                                  | Chr5  | 25788753 | 25793522 - | 7  | 3405 | 6.63 |
| LOC_Os05g44320.2 | WD domain, G-beta repeat domain containing protein, expressed                                  | Chr5  | 25788753 | 25793522 - | 7  | 3420 | 6.63 |
| LOC_Os05g44320.1 | WD domain, G-beta repeat domain containing protein, expressed                                  | Chr5  | 25788753 | 25793638 - | 8  | 3476 | 6.63 |
| LOC_Os01g73550.1 | mitochondrial-processing peptidase subunit alpha, mitochondrial precursor, putative, expressed | Chr1  | 42614788 | 42618386 + | 13 | 2342 | 6.63 |
| LOC_Os01g12650.1 | reticulon domain containing protein, putative, expressed                                       | Chr1  | 6967620  | 6970164 +  | 5  | 1461 | 6.63 |
| LOC_Os01g69950.1 | ribosomal protein L27, putative, expressed                                                     | Chr1  | 40453829 | 40456679 + | 3  | 2064 | 6.63 |
| LOC_Os04g42000.1 | 6,7-dimethyl-8-ribityllumazine synthase, chloroplast precursor, putative, expressed            | Chr4  | 24878141 | 24881728 - | 8  | 1345 | 6.63 |
| LOC_Os03g38490.1 | DAG protein, chloroplast precursor, putative, expressed                                        | Chr3  | 21363895 | 21368916 + | 4  | 1420 | 6.63 |
| LOC_Os01g27720.1 | E3 ubiquitin-protein ligase MGRN1, putative, expressed                                         | Chr1  | 15453620 | 15457813 + | 3  | 1620 | 6.63 |
| LOC_Os05g29880.1 | 3-hydroxyacyl-CoA dehydrogenase, putative, expressed                                           | Chr5  | 17289245 | 17295226 + | 15 | 2421 | 6.64 |

|                  |                                                                                                |       |          |            |    |      |      |
|------------------|------------------------------------------------------------------------------------------------|-------|----------|------------|----|------|------|
| LOC_Os12g44180.1 | nodulin, putative, expressed                                                                   | Chr12 | 27407370 | 27411233 + | 2  | 2365 | 6.64 |
| LOC_Os01g49490.1 | expressed protein                                                                              | Chr1  | 28467690 | 28471172 - | 5  | 944  | 6.64 |
| LOC_Os02g50780.1 | glycosyl hydrolase family 47 domain contain protein, expressed                                 | Chr2  | 31003959 | 31008703 + | 15 | 2530 | 6.64 |
| LOC_Os08g01130.1 | flap endonuclease, putative, expressed                                                         | Chr8  | 87245    | 91948 -    | 14 | 3104 | 6.64 |
| LOC_Os03g42770.1 | expressed protein                                                                              | Chr3  | 23817641 | 23824229 - | 7  | 2386 | 6.64 |
| LOC_Os07g45360.1 | DEAD/DEAH box helicase domain containing protein, expressed                                    | Chr7  | 27055343 | 27059643 + | 11 | 2855 | 6.64 |
| LOC_Os05g01020.3 | transcriptional repressor, putative, expressed                                                 | Chr5  | 38746    | 40978 -    | 6  | 1133 | 6.64 |
| LOC_Os05g01020.4 | transcriptional repressor, putative, expressed                                                 | Chr5  | 38746    | 40978 -    | 5  | 1177 | 6.64 |
| LOC_Os12g32630.1 | OsFBX448 - F-box domain containing protein, expressed                                          | Chr12 | 19684832 | 19687895 - | 2  | 1684 | 6.64 |
| LOC_Os02g13150.2 | pollen-specific protein SF21, putative, expressed                                              | Chr2  | 7008184  | 7010651 +  | 10 | 1980 | 6.65 |
| LOC_Os04g48060.1 | RFC2 - Putative clamp loader of PCNA, replication factor C subunit 2, expressed                | Chr4  | 28597313 | 28600302 + | 7  | 1571 | 6.65 |
| LOC_Os01g73550.2 | mitochondrial-processing peptidase subunit alpha, mitochondrial precursor, putative, expressed | Chr1  | 42614788 | 42618386 + | 12 | 2393 | 6.65 |
| LOC_Os02g12610.1 | hsp20/alpha crystallin family protein, putative, expressed                                     | Chr2  | 6587089  | 6588245 -  | 1  | 1189 | 6.65 |
| LOC_Os02g05520.1 | expressed protein                                                                              | Chr2  | 2668556  | 2671036 +  | 8  | 1250 | 6.65 |
| LOC_Os03g51230.2 | SNF2 family N-terminal domain containing protein, expressed                                    | Chr3  | 29305420 | 29311726 + | 15 | 3710 | 6.65 |
| LOC_Os08g40820.2 | expressed protein                                                                              | Chr8  | 25817761 | 25823321 + | 5  | 2278 | 6.65 |
| LOC_Os08g33650.1 | SET domain-containing protein, putative, expressed                                             | Chr8  | 21014458 | 21015857 + | 1  | 1432 | 6.65 |
| LOC_Os12g32630.2 | OsFBX448 - F-box domain containing protein, expressed                                          | Chr12 | 19684832 | 19687895 - | 2  | 1951 | 6.66 |
| LOC_Os09g36244.1 | expressed protein                                                                              | Chr9  | 20906765 | 20908479 + | 4  | 900  | 6.66 |
| LOC_Os02g55120.1 | translation initiation factor IF-3, putative, expressed                                        | Chr2  | 33758966 | 33762633 - | 10 | 1835 | 6.66 |
| LOC_Os01g39630.1 | DNA repair protein Rad51, putative, expressed                                                  | Chr1  | 22353190 | 22358405 - | 9  | 1951 | 6.66 |
| LOC_Os01g39630.2 | DNA repair protein Rad51, putative, expressed                                                  | Chr1  | 22353190 | 22358405 - | 9  | 1961 | 6.66 |
| LOC_Os11g06810.1 | expressed protein                                                                              | Chr11 | 3332446  | 3338962 +  | 7  | 3744 | 6.66 |
| LOC_Os04g57310.1 | thiol-disulphide oxidoreductase DCC, putative, expressed                                       | Chr4  | 34119501 | 34123601 + | 8  | 1750 | 6.66 |
| LOC_Os04g57310.2 | thiol-disulphide oxidoreductase DCC, putative, expressed                                       | Chr4  | 34119501 | 34123601 + | 8  | 1746 | 6.66 |
| LOC_Os03g03150.2 | WD repeat-containing protein, putative, expressed                                              | Chr3  | 1327397  | 1331210 +  | 11 | 2399 | 6.66 |
| LOC_Os03g51230.1 | SNF2 family N-terminal domain containing protein, expressed                                    | Chr3  | 29305911 | 29311726 + | 14 | 3569 | 6.66 |
| LOC_Os10g41000.1 | retrotransposon protein, putative, unclassified, expressed                                     | Chr10 | 22014949 | 22019101 - | 6  | 2912 | 6.66 |
| LOC_Os08g40820.1 | expressed protein                                                                              | Chr8  | 25817761 | 25823466 + | 5  | 2444 | 6.66 |
| LOC_Os06g50880.1 | WD domain, G-beta repeat domain containing protein, expressed                                  | Chr6  | 30776898 | 30779652 - | 5  | 1960 | 6.66 |
| LOC_Os03g13960.2 | expressed protein                                                                              | Chr3  | 7575109  | 7577428 -  | 4  | 1498 | 6.67 |
| LOC_Os03g44430.1 | ubiquitin carboxyl-terminal hydrolase, family 1, putative, expressed                           | Chr3  | 25001591 | 25003485 - | 1  | 1927 | 6.67 |
| LOC_Os04g38640.2 | OsDegp5 - Putative Deg protease homologue, expressed                                           | Chr4  | 22954845 | 22960460 + | 13 | 2102 | 6.67 |
| LOC_Os04g38640.1 | OsDegp5 - Putative Deg protease homologue, expressed                                           | Chr4  | 22954845 | 22960460 + | 13 | 2113 | 6.67 |
| LOC_Os07g42080.1 | expressed protein                                                                              | Chr7  | 25192300 | 25194950 + | 8  | 1270 | 6.67 |
| LOC_Os12g10650.1 | expressed protein                                                                              | Chr12 | 5692861  | 5696278 +  | 5  | 1149 | 6.67 |
| LOC_Os06g43280.1 | paxneb-related protein, putative, expressed                                                    | Chr6  | 26006182 | 26010413 - | 8  | 2912 | 6.67 |
| LOC_Os03g19760.2 | HAD-superfamily hydrolase, subfamily IA, variant 3 containing protein, expressed               | Chr3  | 11104620 | 11122447 + | 24 | 4352 | 6.67 |
| LOC_Os06g44080.1 | ubiquitin family protein, putative, expressed                                                  | Chr6  | 26585560 | 26588132 + | 3  | 930  | 6.68 |
| LOC_Os04g42784.1 | DNA mismatch repair protein, putative, expressed                                               | Chr4  | 25323642 | 25340031 - | 22 | 4605 | 6.68 |
| LOC_Os09g26730.1 | chaperonin, putative, expressed                                                                | Chr9  | 16236438 | 16240793 - | 5  | 1416 | 6.68 |
| LOC_Os01g09230.1 | expressed protein                                                                              | Chr1  | 4650095  | 4651961 +  | 2  | 1504 | 6.68 |
| LOC_Os05g13370.1 | OsRhmbd12 - Putative Rhomboid homologue, expressed                                             | Chr5  | 7418020  | 7422194 -  | 7  | 1559 | 6.68 |
| LOC_Os04g37660.2 | protein phosphatase protein, putative, expressed                                               | Chr4  | 22391154 | 22393831 - | 7  | 1459 | 6.68 |
| LOC_Os03g43114.2 | expressed protein                                                                              | Chr3  | 24049172 | 24053785 - | 3  | 4541 | 6.68 |

|                  |                                                                                             |       |          |            |    |      |      |
|------------------|---------------------------------------------------------------------------------------------|-------|----------|------------|----|------|------|
| LOC_Os03g43114.1 | expressed protein                                                                           | Chr3  | 24049172 | 24053785 - | 2  | 4569 | 6.68 |
| LOC_Os12g35460.1 | retrotransposon protein, putative, unclassified, expressed                                  | Chr12 | 21557424 | 21568288 + | 9  | 3121 | 6.68 |
| LOC_Os02g45090.1 | expressed protein                                                                           | Chr2  | 27352069 | 27357013 - | 7  | 1872 | 6.68 |
| LOC_Os03g48040.2 | 2Fe-2S iron-sulfur cluster binding domain containing protein, expressed                     | Chr3  | 27309859 | 27312904 + | 8  | 1226 | 6.68 |
| LOC_Os03g48040.1 | 2Fe-2S iron-sulfur cluster binding domain containing protein, expressed                     | Chr3  | 27309857 | 27312904 + | 8  | 1234 | 6.68 |
| LOC_Os10g35520.1 | hydrolase, alpha/beta fold family domain containing protein, expressed                      | Chr10 | 18998799 | 19001037 + | 5  | 1547 | 6.68 |
| LOC_Os02g38060.1 | methyltransferase domain containing protein, expressed                                      | Chr2  | 22990616 | 22995388 + | 9  | 1646 | 6.69 |
| LOC_Os02g38060.2 | methyltransferase domain containing protein, expressed                                      | Chr2  | 22990616 | 22995388 + | 8  | 1697 | 6.69 |
| LOC_Os01g63840.2 | 3-deoxy-D-manno-octulosonic-acid transferase, putative, expressed                           | Chr1  | 37039556 | 37043234 - | 10 | 1845 | 6.69 |
| LOC_Os08g07550.1 | hAT dimerisation domain-containing protein, putative, expressed                             | Chr8  | 4242935  | 4243883 +  | 1  | 981  | 6.69 |
| LOC_Os01g14040.1 | D-tyrosyl-tRNA, putative, expressed                                                         | Chr1  | 7857826  | 7860061 -  | 8  | 1221 | 6.69 |
| LOC_Os02g48360.1 | pyrophosphate--fructose 6-phosphate 1-phosphotransferase subunit alpha, putative, expressed | Chr2  | 29604449 | 29610243 - | 18 | 2864 | 6.69 |
| LOC_Os01g18320.1 | protoporphyrinogen oxidase, chloroplast precursor, putative, expressed                      | Chr1  | 10291889 | 10295536 + | 9  | 2301 | 6.69 |
| LOC_Os07g31550.1 | powdery mildew resistant protein 5, putative, expressed                                     | Chr7  | 18727988 | 18733568 + | 6  | 1842 | 6.69 |
| LOC_Os03g17450.1 | nucleotide binding protein, putative, expressed                                             | Chr3  | 9703689  | 9707179 +  | 6  | 1324 | 6.69 |
| LOC_Os05g01970.4 | NAD dependent epimerase/dehydratase family protein, putative, expressed                     | Chr5  | 552021   | 561773 +   | 10 | 1840 | 6.69 |
| LOC_Os08g04840.1 | MYB family transcription factor, putative, expressed                                        | Chr8  | 2433787  | 2436913 +  | 3  | 1748 | 6.69 |
| LOC_Os07g01490.1 | kinesin motor domain containing protein, putative, expressed                                | Chr7  | 306009   | 309744 -   | 10 | 2968 | 6.69 |
| LOC_Os03g38790.2 | expressed protein                                                                           | Chr3  | 21542265 | 21544654 + | 4  | 660  | 6.69 |
| LOC_Os04g39610.1 | glycerophosphoryl diester phosphodiesterase family protein, putative, expressed             | Chr4  | 23606626 | 23611506 + | 9  | 3540 | 6.70 |
| LOC_Os04g39610.2 | glycerophosphoryl diester phosphodiesterase family protein, putative, expressed             | Chr4  | 23606626 | 23611506 + | 7  | 3711 | 6.70 |
| LOC_Os07g19494.1 | expressed protein                                                                           | Chr7  | 11528001 | 11533710 + | 9  | 2072 | 6.70 |
| LOC_Os07g37680.2 | expressed protein                                                                           | Chr7  | 22590906 | 22594640 + | 8  | 1778 | 6.70 |
| LOC_Os07g37680.1 | expressed protein                                                                           | Chr7  | 22590906 | 22594641 + | 8  | 1792 | 6.70 |
| LOC_Os06g02510.2 | ribosomal protein L13, putative, expressed                                                  | Chr6  | 867364   | 869824 -   | 5  | 1236 | 6.70 |
| LOC_Os06g02510.1 | ribosomal protein L13, putative, expressed                                                  | Chr6  | 867364   | 869824 -   | 5  | 1241 | 6.70 |
| LOC_Os06g02510.4 | ribosomal protein L13, putative, expressed                                                  | Chr6  | 867364   | 869824 -   | 4  | 1291 | 6.70 |
| LOC_Os06g02510.3 | ribosomal protein L13, putative, expressed                                                  | Chr6  | 867364   | 869824 -   | 5  | 1340 | 6.70 |
| LOC_Os06g02510.5 | ribosomal protein L13, putative, expressed                                                  | Chr6  | 867364   | 869824 -   | 3  | 1380 | 6.70 |
| LOC_Os05g01970.3 | NAD dependent epimerase/dehydratase family protein, putative, expressed                     | Chr5  | 552021   | 561773 +   | 10 | 1856 | 6.70 |
| LOC_Os11g37090.1 | pumilio-family RNA binding repeat domain containing protein, expressed                      | Chr11 | 21892581 | 21897269 - | 6  | 3377 | 6.70 |
| LOC_Os02g48360.2 | pyrophosphate--fructose 6-phosphate 1-phosphotransferase subunit alpha, putative, expressed | Chr2  | 29604449 | 29610243 - | 17 | 2947 | 6.70 |
| LOC_Os03g19520.2 | cyclin-related protein, putative, expressed                                                 | Chr3  | 10970763 | 10979478 - | 20 | 4495 | 6.70 |
| LOC_Os03g19520.1 | cyclin-related protein, putative, expressed                                                 | Chr3  | 10970763 | 10979478 - | 20 | 4492 | 6.70 |
| LOC_Os08g05290.1 | receptor-like protein kinase 5 precursor, putative, expressed                               | Chr8  | 2771088  | 2774524 +  | 2  | 3260 | 6.70 |
| LOC_Os01g44110.1 | serine/threonine-protein kinase, putative, expressed                                        | Chr1  | 25281682 | 25286614 + | 9  | 2896 | 6.70 |
| LOC_Os03g08580.2 | expressed protein                                                                           | Chr3  | 4416647  | 4419117 +  | 5  | 1498 | 6.70 |
| LOC_Os03g08580.1 | expressed protein                                                                           | Chr3  | 4416604  | 4419117 +  | 5  | 1571 | 6.70 |
| LOC_Os03g08580.3 | expressed protein                                                                           | Chr3  | 4416631  | 4419117 +  | 4  | 1650 | 6.70 |
| LOC_Os07g01490.2 | kinesin motor domain containing protein, putative, expressed                                | Chr7  | 306009   | 309744 -   | 9  | 3281 | 6.71 |
| LOC_Os06g43570.1 | peptidase, T1 family, putative, expressed                                                   | Chr6  | 26199320 | 26204623 - | 8  | 1629 | 6.71 |
| LOC_Os09g15835.1 | OBP32pep, putative, expressed                                                               | Chr9  | 9663456  | 9665794 -  | 6  | 1671 | 6.71 |
| LOC_Os03g39740.2 | expressed protein                                                                           | Chr3  | 22110421 | 22116473 - | 8  | 3650 | 6.71 |
| LOC_Os06g04350.1 | expressed protein                                                                           | Chr6  | 1849923  | 1853898 -  | 9  | 1888 | 6.71 |
| LOC_Os06g42770.1 | type II intron maturase protein, putative, expressed                                        | Chr6  | 25711868 | 25714681 - | 2  | 2776 | 6.71 |

|                  |                                                                                               |       |          |            |    |      |      |
|------------------|-----------------------------------------------------------------------------------------------|-------|----------|------------|----|------|------|
| LOC_Os03g36439.1 | F-box domain containing protein, expressed                                                    | Chr3  | 20188446 | 20190628 - | 3  | 747  | 6.71 |
| LOC_Os05g41640.3 | phosphoglycerate kinase protein, putative, expressed                                          | Chr5  | 24378361 | 24381762 - | 7  | 2538 | 6.71 |
| LOC_Os06g36910.1 | pentatricopeptide, putative, expressed                                                        | Chr6  | 21750356 | 21752419 + | 1  | 2096 | 6.71 |
| LOC_Os07g09914.1 | expressed protein                                                                             | Chr7  | 5276942  | 5279196 +  | 1  | 2287 | 6.71 |
| LOC_Os05g02150.1 | expressed protein                                                                             | Chr5  | 658106   | 660255 -   | 2  | 1842 | 6.71 |
| LOC_Os03g39740.1 | expressed protein                                                                             | Chr3  | 22110418 | 22116477 - | 8  | 3741 | 6.71 |
| LOC_Os05g45050.1 | reticulon domain containing protein, putative, expressed                                      | Chr5  | 26180088 | 26182354 - | 5  | 1374 | 6.71 |
| LOC_Os05g45050.2 | reticulon domain containing protein, putative, expressed                                      | Chr5  | 26180088 | 26182354 - | 4  | 1443 | 6.71 |
| LOC_Os01g39134.1 | EF hand family protein, putative, expressed                                                   | Chr1  | 22021847 | 22027269 - | 7  | 2034 | 6.72 |
| LOC_Os07g08170.1 | ruvB-like, putative, expressed                                                                | Chr7  | 4150687  | 4156066 -  | 12 | 2553 | 6.72 |
| LOC_Os03g13370.1 | tetratricopeptide repeat domain containing protein, expressed                                 | Chr3  | 7211429  | 7221257 +  | 17 | 3171 | 6.72 |
| LOC_Os03g55470.1 | expressed protein                                                                             | Chr3  | 31553921 | 31558338 + | 6  | 2574 | 6.72 |
| LOC_Os04g43430.2 | pentatricopeptide, putative, expressed                                                        | Chr4  | 25702074 | 25707426 - | 3  | 4276 | 6.72 |
| LOC_Os08g33640.1 | expressed protein                                                                             | Chr8  | 21010736 | 21013624 + | 7  | 1567 | 6.72 |
| LOC_Os08g33640.2 | expressed protein                                                                             | Chr8  | 21010714 | 21013624 + | 7  | 1584 | 6.72 |
| LOC_Os08g14460.2 | expressed protein                                                                             | Chr8  | 8680808  | 8686512 -  | 15 | 2930 | 6.72 |
| LOC_Os08g14460.1 | expressed protein                                                                             | Chr8  | 8680840  | 8686512 -  | 14 | 2953 | 6.72 |
| LOC_Os12g05090.1 | peptidyl-prolyl isomerase, putative, expressed                                                | Chr12 | 2236010  | 2239464 +  | 7  | 1736 | 6.72 |
| LOC_Os01g63840.1 | 3-deoxy-D-manno-octulosonic-acid transferase, putative, expressed                             | Chr1  | 37039556 | 37043234 - | 11 | 2000 | 6.72 |
| LOC_Os01g57460.1 | frataxin, putative, expressed                                                                 | Chr1  | 33205177 | 33208686 + | 5  | 2092 | 6.73 |
| LOC_Os06g10880.3 | bZIP transcription factor, putative, expressed                                                | Chr6  | 5677080  | 5682126 +  | 6  | 1588 | 6.73 |
| LOC_Os06g10880.1 | bZIP transcription factor, putative, expressed                                                | Chr6  | 5677080  | 5682126 +  | 5  | 1874 | 6.73 |
| LOC_Os03g36750.1 | cbbY, putative, expressed                                                                     | Chr3  | 20379616 | 20387075 + | 8  | 1518 | 6.73 |
| LOC_Os01g22660.1 | GDSL-like lipase/acylhydrolase, putative, expressed                                           | Chr1  | 12742056 | 12746046 + | 5  | 2148 | 6.73 |
| LOC_Os03g07370.1 | HNH endonuclease domain-containing protein, putative, expressed                               | Chr3  | 3744427  | 3746086 -  | 4  | 1086 | 6.73 |
| LOC_Os07g07080.1 | regulator of chromosome condensation/beta-lactamase-inhibitor protein II, putative, expressed | Chr7  | 3491976  | 3499332 -  | 12 | 4696 | 6.73 |
| LOC_Os11g03200.1 | EMB2748, putative, expressed                                                                  | Chr11 | 1162136  | 1164910 -  | 7  | 1446 | 6.73 |
| LOC_Os06g10880.2 | bZIP transcription factor, putative, expressed                                                | Chr6  | 5677080  | 5682126 +  | 4  | 1931 | 6.73 |
| LOC_Os09g07480.1 | membrane associated DUF588 domain containing protein, putative, expressed                     | Chr9  | 3745683  | 3749470 +  | 3  | 1344 | 6.73 |
| LOC_Os02g05680.1 | apoptosis-inducing factor 2, putative, expressed                                              | Chr2  | 2776407  | 2779386 +  | 4  | 1605 | 6.74 |
| LOC_Os04g19740.1 | transketolase, chloroplast precursor, putative, expressed                                     | Chr4  | 11026653 | 11032683 + | 7  | 2791 | 6.74 |
| LOC_Os04g11830.1 | TCP family transcription factor, putative, expressed                                          | Chr4  | 6490902  | 6495625 -  | 1  | 4756 | 6.74 |
| LOC_Os03g10540.1 | OsFBX78 - F-box domain containing protein, expressed                                          | Chr3  | 5372966  | 5379447 +  | 5  | 1931 | 6.74 |
| LOC_Os08g42950.1 | haloacid dehalogenase-like hydrolase family protein, putative, expressed                      | Chr8  | 27142260 | 27144969 + | 7  | 1686 | 6.74 |
| LOC_Os05g01970.5 | NAD dependent epimerase/dehydratase family protein, putative, expressed                       | Chr5  | 552021   | 554342 +   | 7  | 1381 | 6.74 |
| LOC_Os02g05680.2 | apoptosis-inducing factor 2, putative, expressed                                              | Chr2  | 2776407  | 2779386 +  | 3  | 2519 | 6.74 |
| LOC_Os03g44290.2 | expansin precursor, putative, expressed                                                       | Chr3  | 24894952 | 24898217 + | 7  | 1673 | 6.74 |
| LOC_Os03g44290.1 | expansin precursor, putative, expressed                                                       | Chr3  | 24894957 | 24898217 + | 7  | 1689 | 6.74 |
| LOC_Os03g44290.3 | expansin precursor, putative, expressed                                                       | Chr3  | 24894957 | 24898217 + | 6  | 1846 | 6.74 |
| LOC_Os02g11060.1 | WD domain, G-beta repeat domain containing protein, expressed                                 | Chr2  | 5924720  | 5930096 +  | 7  | 1893 | 6.74 |
| LOC_Os05g02410.1 | expressed protein                                                                             | Chr5  | 791891   | 794673 +   | 3  | 877  | 6.74 |
| LOC_Os02g53830.1 | MTD1, putative, expressed                                                                     | Chr2  | 32965719 | 32968767 + | 2  | 1327 | 6.74 |
| LOC_Os01g67590.1 | oligopeptidase, putative, expressed                                                           | Chr1  | 39289297 | 39296646 + | 20 | 3234 | 6.75 |
| LOC_Os02g49840.3 | OsMADS57 - MADS-box family gene with MIKc type-box, expressed                                 | Chr2  | 30456666 | 30461554 + | 3  | 1067 | 6.75 |
| LOC_Os08g09270.1 | pentatricopeptide, putative, expressed                                                        | Chr8  | 5384443  | 5388851 +  | 7  | 2300 | 6.75 |



|                  |                                                                                             |       |          |            |    |      |      |
|------------------|---------------------------------------------------------------------------------------------|-------|----------|------------|----|------|------|
| LOC_Os07g07654.1 | BT1 family protein, putative, expressed                                                     | Chr7  | 3834230  | 3840289 +  | 10 | 2294 | 6.75 |
| LOC_Os02g53790.1 | adenylate kinase, putative, expressed                                                       | Chr2  | 32951605 | 32955086 + | 9  | 1544 | 6.75 |
| LOC_Os09g07820.2 | exosome complex exonuclease, putative, expressed                                            | Chr9  | 3959855  | 3965192 +  | 12 | 1721 | 6.75 |
| LOC_Os11g11340.1 | CIP111, putative, expressed                                                                 | Chr11 | 6288905  | 6295161 +  | 10 | 3733 | 6.75 |
| LOC_Os01g57630.2 | pentatricopeptide containing protein, putative, expressed                                   | Chr1  | 33318040 | 33321777 + | 2  | 1856 | 6.75 |
| LOC_Os06g50910.2 | Phosphatidylinositol kinase and FAT containing domain protein, putative, expressed          | Chr6  | 30803811 | 30815783 - | 17 | 8780 | 6.75 |
| LOC_Os10g08599.1 | expressed protein                                                                           | Chr10 | 4671318  | 4674002 +  | 2  | 2106 | 6.75 |
| LOC_Os03g21730.1 | receptor-like protein kinase precursor, putative, expressed                                 | Chr3  | 12411275 | 12415224 + | 3  | 3757 | 6.76 |
| LOC_Os03g64415.1 | kinesin motor domain containing protein, putative, expressed                                | Chr3  | 36402736 | 36405403 - | 8  | 1993 | 6.76 |
| LOC_Os12g35060.2 | expressed protein                                                                           | Chr12 | 21331671 | 21337057 + | 12 | 1790 | 6.76 |
| LOC_Os12g35060.3 | expressed protein                                                                           | Chr12 | 21331671 | 21337057 + | 11 | 1866 | 6.76 |
| LOC_Os01g63800.1 | pleckstrin homology domain-containing protein, putative, expressed                          | Chr1  | 37017028 | 37018048 + | 1  | 1053 | 6.76 |
| LOC_Os08g07480.1 | DNA-directed RNA polymerase subunit, putative, expressed                                    | Chr8  | 4191605  | 4200965 -  | 10 | 4367 | 6.76 |
| LOC_Os03g59450.1 | transporter-related, putative, expressed                                                    | Chr3  | 33837942 | 33841754 - | 4  | 2163 | 6.76 |
| LOC_Os02g55420.1 | aminotransferase, classes I and II, domain containing protein, expressed                    | Chr2  | 33942024 | 33946395 + | 11 | 2223 | 6.76 |
| LOC_Os08g03850.1 | expressed protein                                                                           | Chr8  | 1838516  | 1839042 +  | 2  | 514  | 6.76 |
| LOC_Os08g28214.5 | tesmin/TSO1-like CXC domain containing protein, expressed                                   | Chr8  | 17217571 | 17221240 - | 5  | 1619 | 6.77 |
| LOC_Os05g43670.1 | IQ calmodulin-binding motif family protein, putative, expressed                             | Chr5  | 25390732 | 25392521 - | 2  | 1770 | 6.77 |
| LOC_Os11g34320.1 | regulator of chromosome condensation, putative, expressed                                   | Chr11 | 20119442 | 20125144 - | 13 | 1634 | 6.77 |
| LOC_Os12g42210.1 | OsDegp15 - Putative Deg protease homologue, expressed                                       | Chr12 | 26180159 | 26184989 + | 8  | 1532 | 6.77 |
| LOC_Os09g07820.1 | exosome complex exonuclease, putative, expressed                                            | Chr9  | 3959855  | 3965192 +  | 11 | 1772 | 6.77 |
| LOC_Os09g07820.3 | exosome complex exonuclease, putative, expressed                                            | Chr9  | 3959855  | 3965192 +  | 10 | 1834 | 6.77 |
| LOC_Os02g55470.1 | alpha-1,6-mannosyl-glycoprotein 2-beta-N-acetylglucosaminyltransferase, putative, expressed | Chr2  | 33971370 | 33972686 + | 1  | 1349 | 6.77 |
| LOC_Os03g06440.2 | RNA helicase SDE3, putative, expressed                                                      | Chr3  | 3215482  | 3220186 -  | 6  | 4095 | 6.77 |
| LOC_Os03g06440.1 | RNA helicase SDE3, putative, expressed                                                      | Chr3  | 3215478  | 3220186 -  | 5  | 4183 | 6.77 |
| LOC_Os02g32660.2 | 1,4-alpha-glucan-branching enzyme, chloroplast precursor, putative, expressed               | Chr2  | 19358471 | 19367127 - | 16 | 2780 | 6.77 |
| LOC_Os06g14040.1 | ThiF family domain containing protein, putative, expressed                                  | Chr6  | 7825468  | 7829696 +  | 11 | 2236 | 6.77 |
| LOC_Os03g13000.1 | GTP-binding protein, putative, expressed                                                    | Chr3  | 7022844  | 7026175 +  | 5  | 1619 | 6.77 |
| LOC_Os06g48650.3 | OsSub52 - Putative Subtilisin homologue, expressed                                          | Chr6  | 29434401 | 29441099 + | 10 | 3128 | 6.78 |
| LOC_Os05g01970.2 | NAD dependent epimerase/dehydratase family protein, putative, expressed                     | Chr5  | 552021   | 561497 +   | 8  | 1675 | 6.78 |
| LOC_Os12g32820.2 | pleiotropic drug resistance protein 3, putative, expressed                                  | Chr12 | 19833705 | 19837081 - | 10 | 2748 | 6.78 |
| LOC_Os11g31480.1 | ATP binding protein, putative, expressed                                                    | Chr11 | 18391479 | 18399504 - | 5  | 5581 | 6.78 |
| LOC_Os05g01970.1 | NAD dependent epimerase/dehydratase family protein, putative, expressed                     | Chr5  | 552021   | 561773 +   | 9  | 1897 | 6.78 |
| LOC_Os04g56070.2 | COP9 signalosome complex subunit 5b, putative, expressed                                    | Chr4  | 33394485 | 33397972 + | 7  | 1732 | 6.78 |
| LOC_Os04g56070.1 | COP9 signalosome complex subunit 5b, putative, expressed                                    | Chr4  | 33394485 | 33397972 + | 6  | 1751 | 6.78 |
| LOC_Os03g52970.3 | deoxyhypusine synthase, putative, expressed                                                 | Chr3  | 30381679 | 30386097 + | 8  | 2118 | 6.78 |
| LOC_Os03g02430.1 | PPR repeat domain containing protein, putative, expressed                                   | Chr3  | 861240   | 862777 -   | 3  | 1449 | 6.78 |
| LOC_Os02g10400.1 | expressed protein                                                                           | Chr2  | 5470929  | 5475134 -  | 8  | 1702 | 6.78 |
| LOC_Os02g45120.2 | expressed protein                                                                           | Chr2  | 27369109 | 27371822 + | 4  | 1088 | 6.78 |
| LOC_Os02g45120.3 | expressed protein                                                                           | Chr2  | 27369109 | 27371822 + | 3  | 1165 | 6.78 |
| LOC_Os03g05710.1 | acetyltransferase, GNAT family, putative, expressed                                         | Chr3  | 2843447  | 2844831 -  | 1  | 1417 | 6.79 |
| LOC_Os04g34620.1 | expressed protein                                                                           | Chr4  | 20949614 | 20952806 - | 4  | 1825 | 6.79 |
| LOC_Os06g50900.1 | expressed protein                                                                           | Chr6  | 30799405 | 30801417 + | 3  | 1893 | 6.79 |
| LOC_Os03g12630.1 | expressed protein                                                                           | Chr3  | 6716365  | 6720197 +  | 2  | 757  | 6.79 |
| LOC_Os05g49120.2 | NLI interacting factor-like phosphatase, putative, expressed                                | Chr5  | 28176577 | 28182471 + | 8  | 2492 | 6.79 |

|                  |                                                                                             |       |          |          |   |    |      |      |
|------------------|---------------------------------------------------------------------------------------------|-------|----------|----------|---|----|------|------|
| LOC_Os05g34170.3 | tubulin/FtsZ domain containing protein, putative, expressed                                 | Chr5  | 20204127 | 20207554 | + | 5  | 1918 | 6.79 |
| LOC_Os03g17990.2 | Yip1 domain containing protein, expressed                                                   | Chr3  | 10016479 | 10019739 | + | 2  | 1386 | 6.79 |
| LOC_Os03g17990.1 | Yip1 domain containing protein, expressed                                                   | Chr3  | 10016468 | 10019739 | + | 2  | 1735 | 6.79 |
| LOC_Os03g54063.1 | expressed protein                                                                           | Chr3  | 30994449 | 30996809 | - | 2  | 2338 | 6.79 |
| LOC_Os10g36680.1 | ubiquitin carboxyl-terminal hydrolase, family 1, putative, expressed                        | Chr10 | 19616304 | 19618622 | - | 2  | 2001 | 6.79 |
| LOC_Os03g22700.1 | cyclin-dependent kinase C-2, putative, expressed                                            | Chr3  | 13110912 | 13115736 | - | 6  | 2398 | 6.79 |
| LOC_Os01g65450.1 | ubiquitin-like domain-containing CTD phosphatase 1, putative, expressed                     | Chr1  | 37986807 | 37991778 | - | 6  | 1580 | 6.80 |
| LOC_Os01g65450.2 | ubiquitin-like domain-containing CTD phosphatase 1, putative, expressed                     | Chr1  | 37986809 | 37991795 | - | 7  | 1595 | 6.80 |
| LOC_Os03g10800.2 | BTBN4 - Bric-a-Brac, Tramtrack, Broad Complex BTB domain with non-phototropic hypocotyl 3 N | Chr3  | 5529950  | 5534468  | + | 5  | 3458 | 6.80 |
| LOC_Os01g57630.1 | pentatricopeptide containing protein, putative, expressed                                   | Chr1  | 33318035 | 33322910 | + | 3  | 2180 | 6.80 |
| LOC_Os04g32510.1 | expressed protein                                                                           | Chr4  | 19564239 | 19566320 | + | 4  | 1103 | 6.80 |
| LOC_Os08g42730.1 | radical SAM enzyme, putative, expressed                                                     | Chr8  | 27034929 | 27038859 | + | 6  | 1718 | 6.80 |
| LOC_Os05g49120.1 | NLI interacting factor-like phosphatase, putative, expressed                                | Chr5  | 28176577 | 28182471 | + | 7  | 2575 | 6.80 |
| LOC_Os03g10540.2 | OsFBX78 - F-box domain containing protein, expressed                                        | Chr3  | 5375349  | 5379447  | + | 4  | 1908 | 6.80 |
| LOC_Os08g40930.1 | Alpha amylase, catalytic domain containing protein, expressed                               | Chr8  | 25892391 | 25900576 | - | 18 | 4348 | 6.80 |
| LOC_Os03g57330.1 | IQ calmodulin-binding motif domain containing protein, expressed                            | Chr3  | 32700604 | 32704499 | - | 7  | 2287 | 6.80 |
| LOC_Os11g41540.2 | disease resistance RPP8-like protein 3, putative, expressed                                 | Chr11 | 24911501 | 24917044 | + | 4  | 4599 | 6.80 |
| LOC_Os03g63590.1 | metallo-beta-lactamase, putative, expressed                                                 | Chr3  | 35908631 | 35911694 | - | 5  | 2619 | 6.81 |
| LOC_Os03g57330.3 | IQ calmodulin-binding motif domain containing protein, expressed                            | Chr3  | 32700604 | 32704373 | - | 7  | 2197 | 6.81 |
| LOC_Os04g24710.1 | ubiquitin carboxyl-terminal hydrolase, family 1, putative, expressed                        | Chr4  | 14185877 | 14187787 | - | 1  | 1943 | 6.81 |
| LOC_Os09g34960.1 | hydroxymethylglutaryl-CoA synthase, putative, expressed                                     | Chr9  | 20367318 | 20371359 | + | 12 | 2573 | 6.81 |
| LOC_Os01g22660.2 | GDSL-like lipase/acylhydrolase, putative, expressed                                         | Chr1  | 12742056 | 12746046 | + | 4  | 3794 | 6.81 |
| LOC_Os03g03150.1 | WD repeat-containing protein, putative, expressed                                           | Chr3  | 1327397  | 1331210  | + | 10 | 2589 | 6.81 |
| LOC_Os03g16874.3 | expressed protein                                                                           | Chr3  | 9375951  | 9377728  | + | 3  | 692  | 6.81 |
| LOC_Os03g16874.1 | expressed protein                                                                           | Chr3  | 9375951  | 9377728  | + | 3  | 698  | 6.81 |
| LOC_Os12g35060.1 | expressed protein                                                                           | Chr12 | 21330149 | 21337057 | + | 13 | 2143 | 6.81 |
| LOC_Os05g08410.1 | ATP10 protein, expressed                                                                    | Chr5  | 4585199  | 4588999  | - | 7  | 1286 | 6.81 |
| LOC_Os05g08410.2 | ATP10 protein, expressed                                                                    | Chr5  | 4585199  | 4588999  | - | 6  | 1394 | 6.81 |
| LOC_Os11g41540.1 | disease resistance RPP8-like protein 3, putative, expressed                                 | Chr11 | 24911501 | 24917050 | + | 4  | 4648 | 6.82 |
| LOC_Os01g01670.2 | expressed protein                                                                           | Chr1  | 330238   | 332339   | - | 2  | 1181 | 6.82 |
| LOC_Os02g38490.4 | expressed protein                                                                           | Chr2  | 23272523 | 23274491 | + | 3  | 495  | 6.82 |
| LOC_Os09g28560.1 | protein phosphatase protein, putative, expressed                                            | Chr9  | 17366407 | 17371403 | - | 9  | 2066 | 6.82 |
| LOC_Os07g42590.1 | OsFBX258 - F-box domain containing protein, expressed                                       | Chr7  | 25488221 | 25490062 | + | 1  | 1874 | 6.82 |
| LOC_Os09g28300.2 | remorin C-terminal domain containing protein, putative, expressed                           | Chr9  | 17183709 | 17188378 | + | 8  | 2826 | 6.82 |
| LOC_Os09g28300.1 | remorin C-terminal domain containing protein, putative, expressed                           | Chr9  | 17182867 | 17188378 | + | 8  | 3164 | 6.82 |
| LOC_Os08g40820.3 | expressed protein                                                                           | Chr8  | 25817761 | 25823466 | + | 4  | 4552 | 6.82 |
| LOC_Os06g01690.1 | septum site-determining protein minD, putative, expressed                                   | Chr6  | 410926   | 413145   | + | 2  | 1428 | 6.82 |
| LOC_Os04g48030.1 | heat stress transcription factor B-1, putative, expressed                                   | Chr4  | 28574411 | 28576248 | + | 2  | 1800 | 6.82 |
| LOC_Os01g58550.1 | methyladenine glycosylase, putative, expressed                                              | Chr1  | 33837388 | 33841176 | + | 5  | 2424 | 6.82 |
| LOC_Os02g06650.1 | COX VIIa, putative, expressed                                                               | Chr2  | 3344763  | 3347430  | - | 3  | 848  | 6.82 |
| LOC_Os07g23169.1 | methyltransferase, putative, expressed                                                      | Chr7  | 13057792 | 13068285 | - | 7  | 1722 | 6.82 |
| LOC_Os02g35750.2 | pentatricopeptide repeat domain containing protein, putative, expressed                     | Chr2  | 21471731 | 21475468 | + | 2  | 2933 | 6.82 |
| LOC_Os03g52970.1 | deoxyhypusine synthase, putative, expressed                                                 | Chr3  | 30381679 | 30386050 | + | 8  | 2092 | 6.82 |
| LOC_Os03g43420.1 | single-stranded DNA-binding protein, putative, expressed                                    | Chr3  | 24215221 | 24219448 | - | 5  | 1526 | 6.83 |
| LOC_Os09g31280.2 | OTU-like cysteine protease family protein, putative, expressed                              | Chr9  | 18805788 | 18808749 | + | 7  | 1557 | 6.83 |

|                  |                                                                                            |       |          |            |    |      |      |
|------------------|--------------------------------------------------------------------------------------------|-------|----------|------------|----|------|------|
| LOC_Os09g31280.1 | OTU-like cysteine protease family protein, putative, expressed                             | Chr9  | 18805788 | 18808749 + | 6  | 1604 | 6.83 |
| LOC_Os04g40150.2 | glycosyl transferase family 17 protein, putative, expressed                                | Chr4  | 23892683 | 23896476 - | 2  | 2660 | 6.83 |
| LOC_Os03g16874.2 | expressed protein                                                                          | Chr3  | 9375951  | 9377728 +  | 4  | 931  | 6.83 |
| LOC_Os02g03000.2 | division protein, putative, expressed                                                      | Chr2  | 1178839  | 1182756 -  | 7  | 2883 | 6.83 |
| LOC_Os01g10350.1 | MPPN domain containing protein, expressed                                                  | Chr1  | 5442857  | 5446266 +  | 3  | 1578 | 6.83 |
| LOC_Os02g35180.1 | OsRR2 type-A response regulator, expressed                                                 | Chr2  | 21128620 | 21131370 - | 6  | 1887 | 6.83 |
| LOC_Os08g16914.1 | expressed protein                                                                          | Chr8  | 10360409 | 10364290 - | 5  | 2355 | 6.83 |
| LOC_Os08g16914.2 | expressed protein                                                                          | Chr8  | 10360409 | 10364290 - | 5  | 2355 | 6.83 |
| LOC_Os02g43870.1 | inactive receptor kinase At2g26730 precursor, putative, expressed                          | Chr2  | 26494499 | 26497710 - | 2  | 1965 | 6.83 |
| LOC_Os03g59640.1 | magnesium-chelatase subunit chlD, chloroplast precursor, putative, expressed               | Chr3  | 33955198 | 33961962 + | 15 | 3145 | 6.83 |
| LOC_Os04g40150.1 | glycosyl transferase family 17 protein, putative, expressed                                | Chr4  | 23892683 | 23896476 - | 2  | 2725 | 6.83 |
| LOC_Os01g61380.1 | lactate/malate dehydrogenase, putative, expressed                                          | Chr1  | 35499017 | 35501765 + | 2  | 1826 | 6.84 |
| LOC_Os09g35790.1 | HSF-type DNA-binding domain containing protein, expressed                                  | Chr9  | 20591230 | 20595143 - | 3  | 1876 | 6.84 |
| LOC_Os09g35790.3 | HSF-type DNA-binding domain containing protein, expressed                                  | Chr9  | 20591230 | 20595143 - | 2  | 894  | 6.84 |
| LOC_Os04g36590.1 | transposon protein, putative, unclassified, expressed                                      | Chr4  | 22074971 | 22077951 + | 3  | 2745 | 6.84 |
| LOC_Os03g11660.1 | cysteine synthase, putative, expressed                                                     | Chr3  | 6085639  | 6089052 +  | 6  | 1972 | 6.84 |
| LOC_Os11g36050.1 | prefoldin subunit, putative, expressed                                                     | Chr11 | 21185518 | 21187738 + | 2  | 985  | 6.84 |
| LOC_Os01g37832.2 | thioredoxin, putative, expressed                                                           | Chr1  | 21167873 | 21172661 + | 9  | 1954 | 6.84 |
| LOC_Os01g37832.1 | thioredoxin, putative, expressed                                                           | Chr1  | 21167873 | 21172661 + | 10 | 1393 | 6.84 |
| LOC_Os12g36950.1 | CTP synthase, putative, expressed                                                          | Chr12 | 22656374 | 22662600 - | 23 | 2941 | 6.84 |
| LOC_Os04g25360.2 | tRNA methyltransferase complex GCD14 subunit, putative, expressed                          | Chr4  | 14675329 | 14677874 + | 2  | 1582 | 6.84 |
| LOC_Os02g58210.1 | jmjC domain containing protein, expressed                                                  | Chr2  | 35624137 | 35630806 + | 16 | 3977 | 6.84 |
| LOC_Os02g58210.2 | jmjC domain containing protein, expressed                                                  | Chr2  | 35624137 | 35630806 + | 16 | 3974 | 6.84 |
| LOC_Os07g47780.2 | 60S ribosomal protein L18-3, putative, expressed                                           | Chr7  | 28537586 | 28540125 + | 5  | 1037 | 6.84 |
| LOC_Os03g14580.1 | expressed protein                                                                          | Chr3  | 7911693  | 7914289 +  | 6  | 1448 | 6.84 |
| LOC_Os12g36950.3 | CTP synthase, putative, expressed                                                          | Chr12 | 22656374 | 22662600 - | 24 | 3033 | 6.85 |
| LOC_Os06g15420.1 | asparagine synthetase, putative, expressed                                                 | Chr6  | 8758769  | 8765753 -  | 14 | 2952 | 6.85 |
| LOC_Os01g32790.1 | expressed protein                                                                          | Chr1  | 17994549 | 17997769 - | 3  | 1697 | 6.85 |
| LOC_Os10g34602.1 | csAtPR5, putative, expressed                                                               | Chr10 | 18446071 | 18449621 + | 3  | 1422 | 6.85 |
| LOC_Os07g47780.1 | 60S ribosomal protein L18-3, putative, expressed                                           | Chr7  | 28537586 | 28540125 + | 5  | 1061 | 6.85 |
| LOC_Os12g35040.1 | 2,3-bisphosphoglycerate-independent phosphoglycerate mutase, putative, expressed           | Chr12 | 21324772 | 21327652 - | 5  | 1932 | 6.85 |
| LOC_Os06g48650.1 | OsSub52 - Putative Subtilisin homologue, expressed                                         | Chr6  | 29434356 | 29441106 + | 11 | 3438 | 6.85 |
| LOC_Os08g13699.1 | expressed protein                                                                          | Chr8  | 8159951  | 8162760 -  | 2  | 650  | 6.86 |
| LOC_Os04g55159.1 | LTP125 - Protease inhibitor/seed storage/LTP family protein precursor, putative, expressed | Chr4  | 32792207 | 32794169 - | 1  | 1995 | 6.86 |
| LOC_Os02g02390.1 | S1 RNA binding domain containing protein, expressed                                        | Chr2  | 818981   | 824546 +   | 15 | 3216 | 6.86 |
| LOC_Os01g55740.1 | OsRhmbd4 - Putative Rhomboid homologue, expressed                                          | Chr1  | 32094403 | 32098715 + | 8  | 1390 | 6.86 |
| LOC_Os08g19320.1 | aberrant root formation protein 4, putative, expressed                                     | Chr8  | 11558450 | 11563788 - | 14 | 2515 | 6.86 |
| LOC_Os01g06660.1 | thiamine pyrophosphate enzyme, C-terminal TPP binding domain containing protein, expressed | Chr1  | 3136104  | 3140217 -  | 6  | 2503 | 6.86 |
| LOC_Os07g09814.1 | OsFBX221 - F-box domain containing protein, expressed                                      | Chr7  | 5219438  | 5226721 +  | 3  | 1780 | 6.86 |
| LOC_Os05g47540.4 | CPuORF26 - conserved peptide uORF-containing transcript, expressed                         | Chr5  | 27229401 | 27232308 - | 10 | 2048 | 6.87 |
| LOC_Os05g47540.1 | CPuORF26 - conserved peptide uORF-containing transcript, expressed                         | Chr5  | 27229401 | 27233702 - | 12 | 2482 | 6.87 |
| LOC_Os04g37600.1 | phosphate carrier protein, mitochondrial precursor, putative, expressed                    | Chr4  | 22362239 | 22367204 + | 7  | 2065 | 6.87 |
| LOC_Os05g47540.2 | CPuORF26 - conserved peptide uORF-containing transcript, expressed                         | Chr5  | 27229401 | 27233702 - | 11 | 2589 | 6.88 |
| LOC_Os02g03050.2 | dimethyladenosine transferase, putative, expressed                                         | Chr2  | 1198657  | 1202304 -  | 9  | 2137 | 6.88 |
| LOC_Os10g11140.1 | phosphoglucomutase, putative, expressed                                                    | Chr10 | 6167111  | 6174631 -  | 22 | 2961 | 6.88 |

|                  |                                                                                             |       |          |            |    |      |      |
|------------------|---------------------------------------------------------------------------------------------|-------|----------|------------|----|------|------|
| LOC_Os02g50680.1 | AAA-type ATPase family protein, putative, expressed                                         | Chr2  | 30958609 | 30965278 - | 13 | 2829 | 6.88 |
| LOC_Os10g11140.2 | phosphoglucomutase, putative, expressed                                                     | Chr10 | 6167111  | 6174631 -  | 21 | 3118 | 6.88 |
| LOC_Os12g17910.1 | T-complex protein, putative, expressed                                                      | Chr12 | 10293567 | 10297912 + | 8  | 2369 | 6.88 |
| LOC_Os06g47840.1 | ZOS6-08 - C2H2 zinc finger protein, expressed                                               | Chr6  | 28954541 | 28957840 + | 5  | 1844 | 6.88 |
| LOC_Os07g10890.2 | transcription factor, putative, expressed                                                   | Chr7  | 5951435  | 5955714 +  | 9  | 1795 | 6.89 |
| LOC_Os08g05790.1 | caffeoyl-CoA O-methyltransferase, putative, expressed                                       | Chr8  | 3101979  | 3105447 +  | 9  | 1895 | 6.89 |
| LOC_Os11g23880.3 | expressed protein                                                                           | Chr11 | 13523651 | 13526257 + | 3  | 1574 | 6.89 |
| LOC_Os09g24670.2 | CAAX amino terminal protease family protein, putative, expressed                            | Chr9  | 14680807 | 14684522 + | 9  | 2375 | 6.89 |
| LOC_Os03g43990.2 | BTBN8 - Bric-a-Brac, Tramtrack, Broad Complex BTB domain with non-phototropic hypocotyl 3 N | Chr3  | 24701063 | 24704597 - | 3  | 2532 | 6.89 |
| LOC_Os03g61690.2 | protein phosphatase 2C, putative, expressed                                                 | Chr3  | 34960967 | 34962598 + | 3  | 1547 | 6.89 |
| LOC_Os02g35700.1 | nucleoside diphosphate kinase, putative, expressed                                          | Chr2  | 21453117 | 21455895 + | 5  | 1345 | 6.89 |
| LOC_Os12g33080.1 | 2-oxoglutarate/malate translocator, chloroplast precursor, putative, expressed              | Chr12 | 20005372 | 20008889 + | 3  | 2122 | 6.89 |
| LOC_Os03g26044.1 | CSLA5 - cellulose synthase-like family A%3B mannan synthase, expressed                      | Chr3  | 14925198 | 14930396 - | 10 | 3541 | 6.89 |
| LOC_Os11g29240.1 | expressed protein                                                                           | Chr11 | 16948515 | 16953839 - | 6  | 3596 | 6.89 |
| LOC_Os02g50760.1 | heat shock protein DnaJ, putative, expressed                                                | Chr2  | 30994374 | 30998999 + | 12 | 2541 | 6.89 |
| LOC_Os02g50760.3 | heat shock protein DnaJ, putative, expressed                                                | Chr2  | 30994374 | 30998999 + | 10 | 2636 | 6.89 |
| LOC_Os08g05790.2 | caffeoyl-CoA O-methyltransferase, putative, expressed                                       | Chr8  | 3101979  | 3105447 +  | 9  | 1922 | 6.89 |
| LOC_Os03g09270.3 | ubiquitin carboxyl-terminal hydrolase 26, putative, expressed                               | Chr3  | 4842276  | 4844355 +  | 3  | 1899 | 6.89 |
| LOC_Os02g35700.2 | nucleoside diphosphate kinase, putative, expressed                                          | Chr2  | 21453132 | 21455895 + | 4  | 1518 | 6.89 |
| LOC_Os02g12570.1 | pre-mRNA cleavage complex II protein Clp1, putative, expressed                              | Chr2  | 6568146  | 6572535 +  | 10 | 1952 | 6.89 |
| LOC_Os12g03180.1 | Mad3/BUB1 homology region 1 domain containing protein, expressed                            | Chr12 | 1212877  | 1216296 -  | 5  | 2517 | 6.89 |
| LOC_Os01g40980.1 | helicase, putative, expressed                                                               | Chr1  | 23174817 | 23186976 - | 24 | 4406 | 6.90 |
| LOC_Os10g33940.1 | auxin response factor 18, putative, expressed                                               | Chr10 | 18051860 | 18056913 + | 4  | 2801 | 6.90 |
| LOC_Os03g15890.2 | RNA recognition motif containing protein, expressed                                         | Chr3  | 8767518  | 8770536 -  | 7  | 1673 | 6.90 |
| LOC_Os03g15890.1 | RNA recognition motif containing protein, expressed                                         | Chr3  | 8767518  | 8770548 -  | 7  | 1688 | 6.90 |
| LOC_Os07g41190.1 | WD domain, G-beta repeat domain containing protein, expressed                               | Chr7  | 24660133 | 24662594 + | 2  | 2110 | 6.90 |
| LOC_Os02g50760.2 | heat shock protein DnaJ, putative, expressed                                                | Chr2  | 30994374 | 30998999 + | 11 | 2590 | 6.90 |
| LOC_Os05g41640.1 | phosphoglycerate kinase protein, putative, expressed                                        | Chr5  | 24378361 | 24381762 - | 7  | 2576 | 6.90 |
| LOC_Os12g35060.4 | expressed protein                                                                           | Chr12 | 21330149 | 21337057 + | 10 | 3021 | 6.90 |
| LOC_Os05g44350.1 | conserved uncharacterized protein, putative, expressed                                      | Chr5  | 25807630 | 25810952 + | 7  | 1448 | 6.90 |
| LOC_Os07g42420.1 | 3-oxoacyl-synthase, putative, expressed                                                     | Chr7  | 25392943 | 25398603 - | 13 | 2859 | 6.90 |
| LOC_Os11g12340.2 | disease resistance protein RPM1, putative, expressed                                        | Chr11 | 6889864  | 6896350 +  | 2  | 3454 | 6.91 |
| LOC_Os03g18540.4 | expressed protein                                                                           | Chr3  | 10381358 | 10387602 + | 13 | 2971 | 6.91 |
| LOC_Os07g22930.3 | starch synthase, putative, expressed                                                        | Chr7  | 12916277 | 12921186 - | 13 | 3204 | 6.91 |
| LOC_Os07g22930.2 | starch synthase, putative, expressed                                                        | Chr7  | 12916277 | 12924325 - | 14 | 3415 | 6.91 |
| LOC_Os02g54710.1 | expressed protein                                                                           | Chr2  | 33495975 | 33498162 - | 2  | 1140 | 6.91 |
| LOC_Os09g26370.1 | DUF581 domain containing protein, expressed                                                 | Chr9  | 15927025 | 15928164 + | 2  | 1093 | 6.91 |
| LOC_Os03g18540.1 | expressed protein                                                                           | Chr3  | 10381358 | 10387602 + | 12 | 3140 | 6.91 |
| LOC_Os07g22930.4 | starch synthase, putative, expressed                                                        | Chr7  | 12916277 | 12920695 - | 12 | 2998 | 6.91 |
| LOC_Os07g09814.2 | OsFBX221 - F-box domain containing protein, expressed                                       | Chr7  | 5219438  | 5226721 +  | 4  | 1893 | 6.91 |
| LOC_Os07g10890.1 | transcription factor, putative, expressed                                                   | Chr7  | 5951435  | 5955714 +  | 9  | 1936 | 6.91 |
| LOC_Os05g34670.1 | KH domain containing protein, putative, expressed                                           | Chr5  | 20568919 | 20573667 - | 7  | 2100 | 6.91 |
| LOC_Os11g34210.1 | aspartyl/glutamyl-tRNA amidotransferase subunit B, putative, expressed                      | Chr11 | 20029917 | 20034675 - | 9  | 2434 | 6.92 |
| LOC_Os11g34210.2 | aspartyl/glutamyl-tRNA amidotransferase subunit B, putative, expressed                      | Chr11 | 20029917 | 20034675 - | 9  | 2447 | 6.92 |
| LOC_Os07g43810.1 | RNA recognition motif containing protein, putative, expressed                               | Chr7  | 26211745 | 26214023 + | 4  | 1366 | 6.92 |

|                  |                                                                                               |       |          |          |   |    |      |      |
|------------------|-----------------------------------------------------------------------------------------------|-------|----------|----------|---|----|------|------|
| LOC_Os03g52970.2 | deoxyhypusine synthase, putative, expressed                                                   | Chr3  | 30381679 | 30386050 | + | 7  | 2158 | 6.92 |
| LOC_Os03g11910.1 | DnaK family protein, putative, expressed                                                      | Chr3  | 6243990  | 6247317  | - | 2  | 2384 | 6.92 |
| LOC_Os02g38820.1 | expressed protein                                                                             | Chr2  | 23465969 | 23468071 | - | 6  | 1476 | 6.92 |
| LOC_Os12g39370.2 | expressed protein                                                                             | Chr12 | 24215420 | 24217870 | + | 7  | 1066 | 6.92 |
| LOC_Os07g36450.1 | PPR repeat domain containing protein, putative, expressed                                     | Chr7  | 21802731 | 21805279 | - | 2  | 1288 | 6.92 |
| LOC_Os08g31970.2 | NHL repeat-containing protein, putative, expressed                                            | Chr8  | 19826775 | 19829675 | + | 4  | 1778 | 6.93 |
| LOC_Os08g31970.1 | NHL repeat-containing protein, putative, expressed                                            | Chr8  | 19826775 | 19829675 | + | 4  | 1774 | 6.93 |
| LOC_Os12g39370.1 | expressed protein                                                                             | Chr12 | 24215420 | 24217876 | + | 6  | 1136 | 6.93 |
| LOC_Os03g05320.3 | expressed protein                                                                             | Chr3  | 2581184  | 2583582  | + | 5  | 1428 | 6.93 |
| LOC_Os03g05320.2 | expressed protein                                                                             | Chr3  | 2581186  | 2583582  | + | 6  | 1318 | 6.93 |
| LOC_Os10g33690.1 | GDSL-like lipase/acylhydrolase, putative, expressed                                           | Chr10 | 17766864 | 17772031 | + | 7  | 1464 | 6.93 |
| LOC_Os03g11910.2 | DnaK family protein, putative, expressed                                                      | Chr3  | 6243990  | 6247317  | - | 3  | 2483 | 6.93 |
| LOC_Os03g20380.2 | CAMK_KIN1/SNF1/Nim1_like.2 - CAMK includes calcium/calmodulin dependent protein kinases, e    | Chr3  | 11526273 | 11531983 | - | 14 | 2251 | 6.93 |
| LOC_Os01g37832.3 | thioredoxin, putative, expressed                                                              | Chr1  | 21167873 | 21172661 | + | 9  | 2333 | 6.93 |
| LOC_Os02g30114.2 | expressed protein                                                                             | Chr2  | 17887846 | 17889823 | - | 4  | 1315 | 6.93 |
| LOC_Os07g41260.1 | PPR repeat domain containing protein, putative, expressed                                     | Chr7  | 24724562 | 24728180 | + | 2  | 2048 | 6.93 |
| LOC_Os03g05320.1 | expressed protein                                                                             | Chr3  | 2581203  | 2583582  | + | 6  | 1322 | 6.93 |
| LOC_Os05g47540.5 | CPuORF26 - conserved peptide uORF-containing transcript, expressed                            | Chr5  | 27229401 | 27233006 | - | 12 | 2581 | 6.93 |
| LOC_Os08g36250.1 | expressed protein                                                                             | Chr8  | 22849376 | 22851227 | - | 1  | 1884 | 6.93 |
| LOC_Os03g18540.2 | expressed protein                                                                             | Chr3  | 10381358 | 10387602 | + | 11 | 3248 | 6.93 |
| LOC_Os08g03670.1 | galactosyltransferase family protein, putative, expressed                                     | Chr8  | 1744492  | 1749163  | + | 7  | 2863 | 6.94 |
| LOC_Os10g30190.1 | BTBP2 - Bric-a-Brac, Tramtrack, Broad Complex BTB domain with pentapeptide repeats, expressed | Chr10 | 15689665 | 15693104 | - | 11 | 1974 | 6.94 |
| LOC_Os01g15600.1 | PUR ALPHA-1, putative, expressed                                                              | Chr1  | 8759370  | 8763491  | + | 5  | 1464 | 6.94 |
| LOC_Os12g04210.1 | mitochondrial glycoprotein, putative, expressed                                               | Chr12 | 1774948  | 1777703  | - | 3  | 1043 | 6.94 |
| LOC_Os03g05660.1 | appr-1-p processing enzyme family protein, putative, expressed                                | Chr3  | 2822929  | 2828096  | - | 14 | 2776 | 6.94 |
| LOC_Os01g62900.1 | amino acid kinase, putative, expressed                                                        | Chr1  | 36430978 | 36440843 | + | 21 | 4113 | 6.94 |
| LOC_Os03g20860.1 | expressed protein                                                                             | Chr3  | 11808351 | 11813203 | - | 8  | 1430 | 6.94 |
| LOC_Os10g12354.1 | endonuclease, putative, expressed                                                             | Chr10 | 6868486  | 6878306  | + | 6  | 2590 | 6.94 |
| LOC_Os01g73680.1 | aspartyl aminopeptidase, putative, expressed                                                  | Chr1  | 42689893 | 42696058 | + | 9  | 2812 | 6.94 |
| LOC_Os10g12354.2 | endonuclease, putative, expressed                                                             | Chr10 | 6868486  | 6878306  | + | 6  | 2600 | 6.95 |
| LOC_Os06g36170.1 | initiator tRNA phosphoribosyl transferase family protein, putative, expressed                 | Chr6  | 21167582 | 21171548 | - | 7  | 2274 | 6.95 |
| LOC_Os05g40220.1 | transposon protein, putative, unclassified, expressed                                         | Chr5  | 23622659 | 23627034 | - | 5  | 2685 | 6.95 |
| LOC_Os05g40220.2 | transposon protein, putative, unclassified, expressed                                         | Chr5  | 23622659 | 23627034 | - | 5  | 2688 | 6.95 |
| LOC_Os01g37260.1 | OsFBX14 - F-box domain containing protein, expressed                                          | Chr1  | 20805805 | 20810166 | + | 5  | 1979 | 6.95 |
| LOC_Os01g37260.2 | OsFBX14 - F-box domain containing protein, expressed                                          | Chr1  | 20805790 | 20810162 | + | 5  | 1981 | 6.95 |
| LOC_Os05g47540.3 | CPuORF26 - conserved peptide uORF-containing transcript, expressed                            | Chr5  | 27229401 | 27233662 | - | 13 | 2919 | 6.95 |
| LOC_Os05g07790.1 | DNA binding protein, putative, expressed                                                      | Chr5  | 4195278  | 4200491  | - | 11 | 2387 | 6.95 |
| LOC_Os02g46956.2 | expressed protein                                                                             | Chr2  | 28669044 | 28672377 | + | 6  | 1634 | 6.95 |
| LOC_Os02g46956.1 | expressed protein                                                                             | Chr2  | 28669044 | 28672392 | + | 6  | 1655 | 6.95 |
| LOC_Os02g09930.2 | CSLA1 - cellulose synthase-like family A%3B mannan synthase, expressed                        | Chr2  | 5151783  | 5158885  | - | 8  | 2512 | 6.95 |
| LOC_Os02g09930.1 | CSLA1 - cellulose synthase-like family A%3B mannan synthase, expressed                        | Chr2  | 5151783  | 5158917  | - | 9  | 2473 | 6.95 |
| LOC_Os01g51040.1 | transmembrane protein 16K, putative, expressed                                                | Chr1  | 29318192 | 29322569 | - | 16 | 2951 | 6.95 |
| LOC_Os06g39690.2 | SOUL heme-binding protein, putative, expressed                                                | Chr6  | 23559642 | 23563074 | + | 9  | 1781 | 6.95 |
| LOC_Os06g39690.1 | SOUL heme-binding protein, putative, expressed                                                | Chr6  | 23559642 | 23563074 | + | 9  | 1785 | 6.95 |
| LOC_Os08g37780.1 | NOL1/NOP2/sun family protein, putative, expressed                                             | Chr8  | 23926908 | 23934321 | - | 15 | 3261 | 6.96 |

|                  |                                                                                            |       |          |            |    |      |      |
|------------------|--------------------------------------------------------------------------------------------|-------|----------|------------|----|------|------|
| LOC_Os08g37780.2 | NOL1/NOP2/sun family protein, putative, expressed                                          | Chr8  | 23926908 | 23934321 - | 15 | 3256 | 6.96 |
| LOC_Os04g02500.5 | G-patch domain containing protein, expressed                                               | Chr4  | 907555   | 909965 +   | 5  | 1637 | 6.96 |
| LOC_Os03g59650.2 | BRCA1 C Terminus domain containing protein, expressed                                      | Chr3  | 33962373 | 33968064 + | 10 | 3660 | 6.96 |
| LOC_Os03g59650.1 | BRCA1 C Terminus domain containing protein, expressed                                      | Chr3  | 33962373 | 33968064 + | 10 | 3666 | 6.96 |
| LOC_Os03g59650.3 | BRCA1 C Terminus domain containing protein, expressed                                      | Chr3  | 33962373 | 33968064 + | 10 | 3678 | 6.96 |
| LOC_Os05g09400.3 | 30S ribosomal protein S31, chloroplast precursor, putative, expressed                      | Chr5  | 5276192  | 5277765 -  | 3  | 1332 | 6.96 |
| LOC_Os05g09400.1 | 30S ribosomal protein S31, chloroplast precursor, putative, expressed                      | Chr5  | 5276192  | 5277765 -  | 3  | 1368 | 6.96 |
| LOC_Os03g20380.1 | CAMK_KIN1/SNF1/Nim1_like.2 - CAMK includes calcium/calmodulin depeudent protein kinases, e | Chr3  | 11526272 | 11531983 - | 15 | 2338 | 6.96 |
| LOC_Os04g53230.1 | aminomethyltransferase, putative, expressed                                                | Chr4  | 31700907 | 31703617 + | 3  | 1636 | 6.96 |
| LOC_Os02g55180.2 | ubiquitin carboxyl-terminal hydrolase domain containing protein, expressed                 | Chr2  | 33797366 | 33803864 + | 11 | 4374 | 6.96 |
| LOC_Os02g55180.1 | ubiquitin carboxyl-terminal hydrolase domain containing protein, expressed                 | Chr2  | 33797366 | 33803864 + | 11 | 4398 | 6.96 |
| LOC_Os05g11550.1 | serine/threonine protein phosphatase 5, putative, expressed                                | Chr5  | 6529795  | 6537354 +  | 13 | 2338 | 6.96 |
| LOC_Os07g35720.1 | expressed protein                                                                          | Chr7  | 21391473 | 21393539 - | 3  | 1466 | 6.96 |
| LOC_Os02g37070.1 | expressed protein                                                                          | Chr2  | 22401334 | 22402093 + | 1  | 792  | 6.96 |
| LOC_Os04g14410.1 | expressed protein                                                                          | Chr4  | 8064649  | 8072284 -  | 6  | 1883 | 6.97 |
| LOC_Os03g20380.5 | CAMK_KIN1/SNF1/Nim1_like.2 - CAMK includes calcium/calmodulin depeudent protein kinases, e | Chr3  | 11526272 | 11531983 - | 16 | 2547 | 6.97 |
| LOC_Os10g34230.1 | cytokinin dehydrogenase precursor, putative, expressed                                     | Chr10 | 18270169 | 18274977 + | 5  | 2960 | 6.97 |
| LOC_Os07g01950.2 | expressed protein                                                                          | Chr7  | 583516   | 586787 +   | 2  | 858  | 6.97 |
| LOC_Os07g01950.1 | expressed protein                                                                          | Chr7  | 583516   | 586787 +   | 3  | 812  | 6.97 |
| LOC_Os03g53310.1 | emp24/gp25L/p24 family protein, putative, expressed                                        | Chr3  | 30596382 | 30599551 - | 4  | 1304 | 6.97 |
| LOC_Os01g44980.1 | peptide deformylase, putative, expressed                                                   | Chr1  | 25519992 | 25523268 - | 7  | 1282 | 6.97 |
| LOC_Os05g11550.2 | serine/threonine protein phosphatase 5, putative, expressed                                | Chr5  | 6529795  | 6537354 +  | 12 | 2459 | 6.97 |
| LOC_Os12g39370.3 | expressed protein                                                                          | Chr12 | 24215420 | 24217870 + | 5  | 1444 | 6.97 |
| LOC_Os05g01350.1 | retrotransposon protein, putative, unclassified, expressed                                 | Chr5  | 213567   | 217690 +   | 4  | 3181 | 6.97 |
| LOC_Os06g49310.2 | MATE efflux family protein, putative, expressed                                            | Chr6  | 29877099 | 29885249 + | 9  | 2695 | 6.97 |
| LOC_Os07g06390.4 | expressed protein                                                                          | Chr7  | 3105284  | 3109490 -  | 6  | 1961 | 6.97 |
| LOC_Os03g20380.7 | CAMK_KIN1/SNF1/Nim1_like.2 - CAMK includes calcium/calmodulin depeudent protein kinases, e | Chr3  | 11526273 | 11531116 - | 14 | 3040 | 6.97 |
| LOC_Os06g28880.1 | retrotransposon protein, putative, unclassified, expressed                                 | Chr6  | 16471613 | 16478261 - | 5  | 1211 | 6.97 |
| LOC_Os03g58540.1 | spo0B-associated GTP-binding protein, putative, expressed                                  | Chr3  | 33334430 | 33338512 + | 9  | 2209 | 6.97 |
| LOC_Os03g21600.1 | expressed protein                                                                          | Chr3  | 12334484 | 12337467 - | 4  | 1994 | 6.97 |
| LOC_Os06g12220.1 | HVA22, putative, expressed                                                                 | Chr6  | 6559753  | 6563394 -  | 6  | 1360 | 6.97 |
| LOC_Os01g74030.1 | pumilio-family RNA binding protein, putative, expressed                                    | Chr1  | 42876539 | 42882964 - | 9  | 3928 | 6.97 |
| LOC_Os01g53020.1 | heat shock protein DnaJ, putative, expressed                                               | Chr1  | 30472593 | 30475205 + | 9  | 1712 | 6.98 |
| LOC_Os03g20380.3 | CAMK_KIN1/SNF1/Nim1_like.2 - CAMK includes calcium/calmodulin depeudent protein kinases, e | Chr3  | 11526273 | 11531983 - | 12 | 2547 | 6.98 |
| LOC_Os07g06390.3 | expressed protein                                                                          | Chr7  | 3105284  | 3109490 -  | 7  | 2096 | 6.98 |
| LOC_Os07g06390.2 | expressed protein                                                                          | Chr7  | 3105284  | 3109490 -  | 7  | 2168 | 6.98 |
| LOC_Os03g53950.1 | strictosidine synthase, putative, expressed                                                | Chr3  | 30927223 | 30929823 - | 3  | 1960 | 6.98 |
| LOC_Os02g21260.1 | OsFBL8 - F-box domain and LRR containing protein, expressed                                | Chr2  | 12613768 | 12618503 - | 2  | 1673 | 6.98 |
| LOC_Os01g04200.2 | metallo-beta-lactamase family protein, putative, expressed                                 | Chr1  | 1849834  | 1856303 +  | 13 | 2839 | 6.98 |
| LOC_Os07g01150.3 | fatty acid hydroxylase, putative, expressed                                                | Chr7  | 88336    | 90761 +    | 8  | 1602 | 6.99 |
| LOC_Os02g03050.1 | dimethyladenosine transferase, putative, expressed                                         | Chr2  | 1198096  | 1202330 -  | 10 | 2242 | 6.99 |
| LOC_Os12g42430.2 | IQ calmodulin-binding motif domain containing protein, expressed                           | Chr12 | 26369224 | 26374188 - | 7  | 2093 | 6.99 |
| LOC_Os03g17590.1 | cat eye syndrome critical region protein 5 precursor, putative, expressed                  | Chr3  | 9783786  | 9788821 -  | 11 | 2118 | 6.99 |
| LOC_Os06g48650.2 | OsSub52 - Putative Subtilisin homologue, expressed                                         | Chr6  | 29435100 | 29441099 + | 10 | 3440 | 6.99 |
| LOC_Os03g58540.2 | spo0B-associated GTP-binding protein, putative, expressed                                  | Chr3  | 33334430 | 33338512 + | 8  | 2293 | 6.99 |

|                  |                                                                                            |       |          |          |   |    |      |      |
|------------------|--------------------------------------------------------------------------------------------|-------|----------|----------|---|----|------|------|
| LOC_Os03g58540.3 | spo0B-associated GTP-binding protein, putative, expressed                                  | Chr3  | 33334430 | 33338512 | + | 7  | 2381 | 6.99 |
| LOC_Os01g04200.3 | metallo-beta-lactamase family protein, putative, expressed                                 | Chr1  | 1849837  | 1856303  | + | 12 | 3049 | 6.99 |
| LOC_Os01g01390.5 | expressed protein                                                                          | Chr1  | 197647   | 200803   | + | 3  | 1150 | 7.00 |
| LOC_Os10g34740.1 | methyltransferase, putative, expressed                                                     | Chr10 | 18548190 | 18552850 | + | 13 | 2272 | 7.00 |
| LOC_Os08g14490.1 | dehydrogenase-phosphopantetheinyltransferase, putative, expressed                          | Chr8  | 8703799  | 8708988  | + | 8  | 1872 | 7.00 |
| LOC_Os01g49010.2 | ORC4 - Putative origin recognition complex subunit 4, expressed                            | Chr1  | 28161732 | 28166115 | + | 16 | 2015 | 7.00 |
| LOC_Os09g29100.1 | cyclin, putative, expressed                                                                | Chr9  | 17680696 | 17683508 | + | 6  | 2062 | 7.00 |
| LOC_Os01g59100.1 | cytokinin-N-glucosyltransferase 1, putative, expressed                                     | Chr1  | 34141403 | 34145203 | + | 2  | 2136 | 7.00 |
| LOC_Os03g09270.2 | ubiquitin carboxyl-terminal hydrolase 26, putative, expressed                              | Chr3  | 4842276  | 4844355  | + | 2  | 2058 | 7.01 |
| LOC_Os05g30210.1 | expressed protein                                                                          | Chr5  | 17506661 | 17510762 | + | 6  | 2616 | 7.01 |
| LOC_Os02g38250.1 | EMB1745, putative, expressed                                                               | Chr2  | 23132028 | 23140339 | - | 15 | 3177 | 7.01 |
| LOC_Os01g27730.1 | GTPase of unknown function domain containing protein, putative, expressed                  | Chr1  | 15462065 | 15466760 | - | 9  | 2888 | 7.01 |
| LOC_Os05g40260.1 | acetyltransferase, GNAT family, putative, expressed                                        | Chr5  | 23642766 | 23646937 | + | 7  | 1690 | 7.01 |
| LOC_Os04g49580.2 | nucleolar complex protein, putative, expressed                                             | Chr4  | 29571617 | 29577671 | - | 14 | 2431 | 7.01 |
| LOC_Os03g20380.8 | CAMK_KIN1/SNF1/Nim1_like.2 - CAMK includes calcium/calmodulin dependent protein kinases, e | Chr3  | 11526272 | 11531983 | - | 11 | 2809 | 7.01 |
| LOC_Os09g38330.1 | MORN repeat domain containing protein, expressed                                           | Chr9  | 22048464 | 22057029 | - | 17 | 3417 | 7.02 |
| LOC_Os07g35720.3 | expressed protein                                                                          | Chr7  | 21391473 | 21393560 | - | 2  | 2055 | 7.02 |
| LOC_Os06g12990.1 | tRNA methyltransferase, putative, expressed                                                | Chr6  | 7118829  | 7120448  | + | 3  | 1217 | 7.02 |
| LOC_Os08g05560.1 | zinc finger, C3HC4 type domain containing protein, expressed                               | Chr8  | 2972597  | 2976414  | + | 9  | 2607 | 7.02 |
| LOC_Os06g06210.2 | expressed protein                                                                          | Chr6  | 2874350  | 2877067  | + | 2  | 2306 | 7.02 |
| LOC_Os09g37446.2 | expressed protein                                                                          | Chr9  | 21595349 | 21597946 | - | 4  | 2454 | 7.03 |
| LOC_Os07g35720.2 | expressed protein                                                                          | Chr7  | 21391473 | 21393451 | - | 1  | 2011 | 7.03 |
| LOC_Os07g01150.2 | fatty acid hydroxylase, putative, expressed                                                | Chr7  | 88336    | 90761    | + | 7  | 1643 | 7.03 |
| LOC_Os12g42430.3 | IQ calmodulin-binding motif domain containing protein, expressed                           | Chr12 | 26369224 | 26374651 | - | 7  | 2073 | 7.03 |
| LOC_Os11g37330.2 | pentatricopeptide repeat domain containing protein, putative, expressed                    | Chr11 | 22040368 | 22044971 | + | 4  | 3028 | 7.03 |
| LOC_Os11g37330.1 | pentatricopeptide repeat domain containing protein, putative, expressed                    | Chr11 | 22040368 | 22044971 | + | 4  | 3050 | 7.03 |
| LOC_Os10g34430.1 | Dicer, putative, expressed                                                                 | Chr10 | 18360484 | 18372591 | + | 25 | 5998 | 7.03 |
| LOC_Os02g57050.1 | diphthamide biosynthesis protein, putative, expressed                                      | Chr2  | 34934531 | 34936977 | - | 2  | 1789 | 7.03 |
| LOC_Os03g02730.1 | expressed protein                                                                          | Chr3  | 1024732  | 1026761  | - | 4  | 1064 | 7.04 |
| LOC_Os09g13820.1 | pollen signalling protein with adenylyl cyclase activity, putative, expressed              | Chr9  | 8118804  | 8123212  | + | 4  | 3807 | 7.04 |
| LOC_Os12g42430.1 | IQ calmodulin-binding motif domain containing protein, expressed                           | Chr12 | 26369224 | 26374651 | - | 7  | 2091 | 7.04 |
| LOC_Os01g51710.1 | zinc knuckle domain containing protein, expressed                                          | Chr1  | 29736288 | 29739449 | - | 9  | 1796 | 7.04 |
| LOC_Os03g20380.6 | CAMK_KIN1/SNF1/Nim1_like.2 - CAMK includes calcium/calmodulin dependent protein kinases, e | Chr3  | 11526273 | 11531983 | - | 16 | 2781 | 7.04 |
| LOC_Os01g47256.1 | exosome complex exonuclease RRP40, putative, expressed                                     | Chr1  | 27004253 | 27008038 | + | 10 | 1518 | 7.04 |
| LOC_Os01g68840.1 | CRP6 - Cysteine-rich family protein precursor, expressed                                   | Chr1  | 39998110 | 39999091 | - | 2  | 956  | 7.04 |
| LOC_Os06g11600.3 | growth regulator related protein, putative, expressed                                      | Chr6  | 6147243  | 6151201  | + | 10 | 2526 | 7.04 |
| LOC_Os07g35985.1 | expressed protein                                                                          | Chr7  | 21524199 | 21528261 | - | 2  | 3218 | 7.04 |
| LOC_Os03g04270.1 | OsFBL10 - F-box domain and LRR containing protein, expressed                               | Chr3  | 1956859  | 1959799  | - | 4  | 2455 | 7.05 |
| LOC_Os05g10570.2 | expressed protein                                                                          | Chr5  | 5749598  | 5751023  | + | 3  | 981  | 7.05 |
| LOC_Os09g37446.1 | expressed protein                                                                          | Chr9  | 21595350 | 21597946 | - | 3  | 2501 | 7.05 |
| LOC_Os10g36880.1 | kinesin motor domain containing protein, putative, expressed                               | Chr10 | 19756762 | 19768053 | - | 25 | 4505 | 7.05 |
| LOC_Os06g48780.1 | 60S acidic ribosomal protein, putative, expressed                                          | Chr6  | 29527352 | 29528953 | - | 2  | 751  | 7.05 |
| LOC_Os01g49010.1 | ORC4 - Putative origin recognition complex subunit 4, expressed                            | Chr1  | 28161732 | 28166115 | + | 16 | 2150 | 7.05 |
| LOC_Os05g11750.3 | protein kinase, putative, expressed                                                        | Chr5  | 6666868  | 6671937  | - | 6  | 2001 | 7.05 |
| LOC_Os05g11750.2 | protein kinase, putative, expressed                                                        | Chr5  | 6666869  | 6671971  | - | 5  | 2104 | 7.05 |

|                  |                                                                                                 |       |          |            |    |      |      |
|------------------|-------------------------------------------------------------------------------------------------|-------|----------|------------|----|------|------|
| LOC_Os08g01040.1 | zinc finger, C3HC4 type domain containing protein, expressed                                    | Chr8  | 26272    | 33518 -    | 7  | 5636 | 7.06 |
| LOC_Os09g27980.1 | emp24/gp25L/p24 family protein, putative, expressed                                             | Chr9  | 16996540 | 16999938 + | 4  | 1371 | 7.06 |
| LOC_Os03g05049.1 | expressed protein                                                                               | Chr3  | 2460730  | 2462190 +  | 1  | 1493 | 7.06 |
| LOC_Os10g02650.1 | PPR repeat containing protein, expressed                                                        | Chr10 | 1033932  | 1037595 -  | 4  | 2978 | 7.06 |
| LOC_Os10g34310.1 | PPR repeat containing protein, expressed                                                        | Chr10 | 18297833 | 18300119 - | 2  | 2188 | 7.06 |
| LOC_Os10g34310.2 | PPR repeat containing protein, expressed                                                        | Chr10 | 18297837 | 18300228 - | 2  | 2298 | 7.06 |
| LOC_Os02g30114.1 | expressed protein                                                                               | Chr2  | 17887846 | 17889802 - | 4  | 1628 | 7.06 |
| LOC_Os10g19331.1 | expressed protein                                                                               | Chr10 | 9860248  | 9862358 +  | 1  | 2143 | 7.06 |
| LOC_Os01g12670.1 | expressed protein                                                                               | Chr1  | 6979613  | 6985778 +  | 10 | 2235 | 7.06 |
| LOC_Os01g12670.2 | expressed protein                                                                               | Chr1  | 6979613  | 6985778 +  | 10 | 2250 | 7.06 |
| LOC_Os01g31680.1 | uncharacterized protein sll0194, putative, expressed                                            | Chr1  | 17341202 | 17346405 - | 4  | 1559 | 7.06 |
| LOC_Os01g31680.2 | uncharacterized protein sll0194, putative, expressed                                            | Chr1  | 17341202 | 17346405 - | 4  | 1529 | 7.06 |
| LOC_Os02g03970.1 | PPR repeat domain containing protein, putative, expressed                                       | Chr2  | 1708915  | 1716927 -  | 15 | 3148 | 7.06 |
| LOC_Os01g12670.5 | expressed protein                                                                               | Chr1  | 6979613  | 6985773 +  | 10 | 2233 | 7.06 |
| LOC_Os04g57739.1 | expressed protein                                                                               | Chr4  | 34393144 | 34396573 + | 4  | 1323 | 7.06 |
| LOC_Os03g51984.1 | differentiation protein, putative, expressed                                                    | Chr3  | 29828701 | 29831679 + | 8  | 1553 | 7.07 |
| LOC_Os07g01150.1 | fatty acid hydroxylase, putative, expressed                                                     | Chr7  | 88336    | 90761 +    | 6  | 1699 | 7.07 |
| LOC_Os04g52590.1 | protein kinase domain containing protein, expressed                                             | Chr4  | 31263093 | 31270896 - | 20 | 4049 | 7.07 |
| LOC_Os05g34170.2 | tubulin/FtsZ domain containing protein, putative, expressed                                     | Chr5  | 20204127 | 20207554 + | 4  | 2022 | 7.07 |
| LOC_Os06g49870.1 | tRNA-dihydrouridine synthase, putative, expressed                                               | Chr6  | 30187080 | 30189238 - | 3  | 1711 | 7.08 |
| LOC_Os06g09280.1 | ATP-dependent RNA helicase, putative, expressed                                                 | Chr6  | 4659377  | 4667061 +  | 13 | 3309 | 7.08 |
| LOC_Os05g10570.1 | expressed protein                                                                               | Chr5  | 5749600  | 5751023 +  | 4  | 1078 | 7.08 |
| LOC_Os05g30340.2 | expressed protein                                                                               | Chr5  | 17582905 | 17588053 + | 6  | 2080 | 7.08 |
| LOC_Os04g35510.2 | CENP-E-like kinetochore protein, putative, expressed                                            | Chr4  | 21609373 | 21611533 - | 5  | 1715 | 7.08 |
| LOC_Os01g12180.1 | expressed protein                                                                               | Chr1  | 6642665  | 6645196 -  | 2  | 1969 | 7.08 |
| LOC_Os01g73310.1 | actin, putative, expressed                                                                      | Chr1  | 42484073 | 42487451 - | 5  | 1786 | 7.08 |
| LOC_Os05g26902.1 | chaperone protein dnaJ, putative, expressed                                                     | Chr5  | 15617643 | 15622604 - | 8  | 2226 | 7.08 |
| LOC_Os05g26926.1 | chaperone protein dnaJ, putative, expressed                                                     | Chr5  | 15635360 | 15638497 - | 7  | 2056 | 7.08 |
| LOC_Os03g63690.1 | BCCIP, putative, expressed                                                                      | Chr3  | 35970786 | 35973334 - | 8  | 1638 | 7.08 |
| LOC_Os11g39300.1 | expressed protein                                                                               | Chr11 | 23398861 | 23401546 + | 5  | 598  | 7.08 |
| LOC_Os04g35510.1 | CENP-E-like kinetochore protein, putative, expressed                                            | Chr4  | 21609373 | 21611508 - | 4  | 1734 | 7.08 |
| LOC_Os10g35450.1 | serine/threonine-protein kinase, putative, expressed                                            | Chr10 | 18970490 | 18975230 + | 8  | 2674 | 7.09 |
| LOC_Os03g09270.1 | ubiquitin carboxyl-terminal hydrolase 26, putative, expressed                                   | Chr3  | 4840901  | 4844355 +  | 5  | 1629 | 7.09 |
| LOC_Os08g38320.2 | AGC_PVPK_like_kin82y.14 - ACG kinases include homologs to PKA, PKG and PKC, expressed           | Chr8  | 24274676 | 24277516 + | 3  | 2450 | 7.09 |
| LOC_Os02g10310.2 | fumarylacetoacetase, putative, expressed                                                        | Chr2  | 5414913  | 5418208 -  | 13 | 1879 | 7.09 |
| LOC_Os02g10310.3 | fumarylacetoacetase, putative, expressed                                                        | Chr2  | 5414913  | 5417900 -  | 13 | 1783 | 7.09 |
| LOC_Os05g42300.1 | NAF1 domain containing protein, expressed                                                       | Chr5  | 24738575 | 24742551 - | 3  | 3123 | 7.09 |
| LOC_Os01g08930.1 | DEAD-box ATP-dependent RNA helicase, putative, expressed                                        | Chr1  | 4485747  | 4490158 -  | 9  | 2452 | 7.09 |
| LOC_Os03g16220.4 | oxidoreductase, short chain dehydrogenase/reductase family domain containing protein, expressed | Chr3  | 8945110  | 8947912 -  | 4  | 1271 | 7.10 |
| LOC_Os05g33290.1 | uncharacterized conserved membrane protein specific to cyanobacteria, putative, expressed       | Chr5  | 19509973 | 19514162 - | 9  | 1522 | 7.10 |
| LOC_Os02g10310.1 | fumarylacetoacetase, putative, expressed                                                        | Chr2  | 5414913  | 5418652 -  | 14 | 2162 | 7.10 |
| LOC_Os08g38320.1 | AGC_PVPK_like_kin82y.14 - ACG kinases include homologs to PKA, PKG and PKC, expressed           | Chr8  | 24274009 | 24277516 + | 3  | 2694 | 7.10 |
| LOC_Os06g01290.1 | expressed protein                                                                               | Chr6  | 182104   | 184623 +   | 4  | 1026 | 7.10 |
| LOC_Os03g20380.4 | CAMK_KIN1/SNF1/Nim1_like.2 - CAMK includes calcium/calmodulin dependent protein kinases, e      | Chr3  | 11526272 | 11531983 - | 15 | 2893 | 7.10 |
| LOC_Os04g37580.1 | cation transport regulator-like protein 1, putative, expressed                                  | Chr4  | 22354947 | 22357999 - | 8  | 1709 | 7.10 |



|                  |                                                                                       |       |          |          |   |    |      |      |
|------------------|---------------------------------------------------------------------------------------|-------|----------|----------|---|----|------|------|
| LOC_Os08g38320.3 | AGC_PVPK_like_kin82y.14 - ACG kinases include homologs to PKA, PKG and PKC, expressed | Chr8  | 24274360 | 24277516 | + | 3  | 2486 | 7.10 |
| LOC_Os04g57739.2 | expressed protein                                                                     | Chr4  | 34393144 | 34396566 | + | 3  | 1703 | 7.11 |
| LOC_Os07g06300.1 | ethylene-insensitive protein 2, putative, expressed                                   | Chr7  | 3061699  | 3069673  | + | 8  | 4795 | 7.11 |
| LOC_Os08g33440.1 | 2-oxo acid dehydrogenases acyltransferase domain containing protein, expressed        | Chr8  | 20858724 | 20862259 | - | 6  | 2052 | 7.11 |
| LOC_Os06g35050.1 | arogenate dehydrogenase 1, chloroplast precursor, putative, expressed                 | Chr6  | 20400347 | 20403403 | + | 6  | 1887 | 7.11 |
| LOC_Os07g06130.3 | ethylene-insensitive protein, putative, expressed                                     | Chr7  | 2984331  | 2991139  | + | 8  | 5047 | 7.11 |
| LOC_Os07g43390.1 | 4-alpha-glucanotransferase, chloroplast precursor, putative, expressed                | Chr7  | 25980425 | 25984955 | + | 16 | 2626 | 7.11 |
| LOC_Os07g06130.1 | ethylene-insensitive protein, putative, expressed                                     | Chr7  | 2984428  | 2991139  | + | 7  | 5050 | 7.11 |
| LOC_Os03g25450.1 | h/ACA ribonucleoprotein complex subunit 4, putative, expressed                        | Chr3  | 14545715 | 14547929 | + | 1  | 2247 | 7.12 |
| LOC_Os06g34120.1 | GDSL-like lipase/acylhydrolase, putative, expressed                                   | Chr6  | 19866070 | 19870006 | - | 5  | 1740 | 7.12 |
| LOC_Os07g19400.1 | pentatricopeptide domain containing protein, putative, expressed                      | Chr7  | 11479597 | 11481898 | + | 1  | 2334 | 7.12 |
| LOC_Os04g28300.1 | Rf1, mitochondrial precursor, putative, expressed                                     | Chr4  | 16753556 | 16757223 | + | 3  | 2631 | 7.12 |
| LOC_Os02g02480.1 | basic helix-loop-helix DND-binding domain containing protein, expressed               | Chr2  | 875238   | 878615   | - | 5  | 2210 | 7.12 |
| LOC_Os12g35320.1 | RING finger and CHY zinc finger domain-containing protein 1, putative, expressed      | Chr12 | 21456301 | 21459958 | + | 12 | 1809 | 7.12 |
| LOC_Os02g02720.2 | SNARE domain containing protein, putative, expressed                                  | Chr2  | 1022101  | 1024713  | - | 8  | 1234 | 7.12 |
| LOC_Os02g02720.1 | SNARE domain containing protein, putative, expressed                                  | Chr2  | 1022080  | 1024751  | - | 7  | 1453 | 7.13 |
| LOC_Os02g56320.1 | glycogen synthase 1, putative, expressed                                              | Chr2  | 34475930 | 34483804 | + | 23 | 3431 | 7.13 |
| LOC_Os10g36924.1 | aquaporin protein, putative, expressed                                                | Chr10 | 19778055 | 19785158 | - | 3  | 2391 | 7.13 |
| LOC_Os03g48320.1 | disease resistance RPP13-like protein 1, putative, expressed                          | Chr3  | 27517616 | 27521492 | - | 2  | 3604 | 7.13 |
| LOC_Os03g21980.1 | tRNA pseudouridine synthase family protein, putative, expressed                       | Chr3  | 12591671 | 12595636 | - | 7  | 2174 | 7.13 |
| LOC_Os03g21980.2 | tRNA pseudouridine synthase family protein, putative, expressed                       | Chr3  | 12591671 | 12595636 | - | 7  | 2190 | 7.13 |
| LOC_Os06g36320.1 | receptor-like protein kinase 5 precursor, putative, expressed                         | Chr6  | 21279310 | 21282208 | + | 3  | 2834 | 7.14 |
| LOC_Os05g05260.1 | helicase, putative, expressed                                                         | Chr5  | 2584798  | 2590120  | - | 11 | 3069 | 7.14 |
| LOC_Os02g51290.1 | HVA22, putative, expressed                                                            | Chr2  | 31407145 | 31409724 | + | 6  | 1314 | 7.14 |
| LOC_Os11g43320.1 | NBS-LRR type disease resistance protein, putative, expressed                          | Chr11 | 26139957 | 26143460 | + | 1  | 3536 | 7.14 |
| LOC_Os01g43050.1 | CENP-C1, putative, expressed                                                          | Chr1  | 24559329 | 24568663 | + | 18 | 3473 | 7.14 |
| LOC_Os04g49580.1 | nucleolar complex protein, putative, expressed                                        | Chr4  | 29571617 | 29577678 | - | 15 | 2644 | 7.14 |
| LOC_Os08g36450.1 | transcription regulator, putative, expressed                                          | Chr8  | 23001447 | 23003138 | + | 1  | 1724 | 7.14 |
| LOC_Os04g56654.1 | BSD domain-containing protein, putative, expressed                                    | Chr4  | 33782171 | 33784081 | + | 4  | 993  | 7.14 |
| LOC_Os07g40030.2 | WD domain, G-beta repeat domain containing protein, expressed                         | Chr7  | 24020377 | 24025145 | + | 11 | 1809 | 7.14 |
| LOC_Os05g29880.3 | 3-hydroxyacyl-CoA dehydrogenase, putative, expressed                                  | Chr5  | 17289363 | 17296117 | + | 17 | 2719 | 7.14 |
| LOC_Os12g35590.1 | expressed protein                                                                     | Chr12 | 21640401 | 21641720 | - | 1  | 1352 | 7.15 |
| LOC_Os07g43310.1 | ribosomal protein L7/L12 C-terminal domain containing protein, expressed              | Chr7  | 25930284 | 25931363 | - | 1  | 1112 | 7.15 |
| LOC_Os08g19320.2 | aberrant root formation protein 4, putative, expressed                                | Chr8  | 11558450 | 11563711 | - | 13 | 3131 | 7.15 |
| LOC_Os04g52230.1 | ent-kaurene synthase, chloroplast precursor, putative, expressed                      | Chr4  | 31026617 | 31031248 | + | 14 | 3373 | 7.15 |
| LOC_Os01g47256.4 | exosome complex exonuclease RRP40, putative, expressed                                | Chr1  | 27004253 | 27008038 | + | 10 | 1631 | 7.15 |
| LOC_Os01g47256.2 | exosome complex exonuclease RRP40, putative, expressed                                | Chr1  | 27004253 | 27008038 | + | 10 | 1635 | 7.15 |
| LOC_Os11g05556.1 | signal recognition particle 54 kDa protein, putative, expressed                       | Chr11 | 2517481  | 2521945  | + | 15 | 2479 | 7.15 |
| LOC_Os11g05556.2 | signal recognition particle 54 kDa protein, putative, expressed                       | Chr11 | 2517481  | 2521944  | + | 14 | 2535 | 7.15 |
| LOC_Os03g20560.1 | biotin--protein ligase, putative, expressed                                           | Chr3  | 11652964 | 11653968 | - | 1  | 1037 | 7.15 |
| LOC_Os10g19334.2 | alpha-1,2-fucosidase, putative, expressed                                             | Chr10 | 9861144  | 9866870  | - | 8  | 2837 | 7.15 |
| LOC_Os03g34310.6 | expressed protein                                                                     | Chr3  | 19528035 | 19531714 | + | 6  | 1695 | 7.15 |
| LOC_Os03g34310.2 | expressed protein                                                                     | Chr3  | 19528037 | 19531714 | + | 7  | 1768 | 7.15 |
| LOC_Os03g61690.1 | protein phosphatase 2C, putative, expressed                                           | Chr3  | 34960967 | 34964362 | + | 4  | 1973 | 7.15 |
| LOC_Os11g32880.2 | DEAD-box ATP-dependent RNA helicase, putative, expressed                              | Chr11 | 19421481 | 19429665 | - | 14 | 3572 | 7.16 |

|                  |                                                                                             |       |          |            |    |      |      |
|------------------|---------------------------------------------------------------------------------------------|-------|----------|------------|----|------|------|
| LOC_Os03g45170.1 | amino acid permease, putative, expressed                                                    | Chr3  | 25504234 | 25509983 - | 14 | 2920 | 7.16 |
| LOC_Os02g49460.1 | auxin-independent growth promoter protein, putative, expressed                              | Chr2  | 30226406 | 30230718 + | 8  | 2961 | 7.16 |
| LOC_Os09g34900.1 | bile acid sodium symporter family protein, putative, expressed                              | Chr9  | 20337183 | 20340505 - | 8  | 1946 | 7.16 |
| LOC_Os06g04620.1 | GDP-mannose 4,6 dehydratase 2, putative, expressed                                          | Chr6  | 2017778  | 2019458 +  | 1  | 1713 | 7.16 |
| LOC_Os07g39840.1 | expressed protein                                                                           | Chr7  | 23888290 | 23891639 - | 2  | 1604 | 7.17 |
| LOC_Os03g10334.1 | expressed protein                                                                           | Chr3  | 5271246  | 5272333 +  | 3  | 920  | 7.17 |
| LOC_Os06g08390.1 | Ser/Thr protein phosphatase family protein, putative, expressed                             | Chr6  | 4087964  | 4092245 +  | 9  | 1699 | 7.17 |
| LOC_Os12g35395.1 | expressed protein                                                                           | Chr12 | 21526777 | 21528011 - | 1  | 1267 | 7.17 |
| LOC_Os03g61850.1 | transposon protein, putative, unclassified, expressed                                       | Chr3  | 35065657 | 35068512 - | 5  | 2680 | 7.18 |
| LOC_Os03g58620.1 | small multi-drug export protein, putative, expressed                                        | Chr3  | 33388090 | 33391157 - | 2  | 1373 | 7.18 |
| LOC_Os01g62440.1 | ribonuclease protein, putative, expressed                                                   | Chr1  | 36138699 | 36146302 - | 14 | 3523 | 7.18 |
| LOC_Os04g41550.1 | CRS1/YhbY domain containing protein, putative, expressed                                    | Chr4  | 24644170 | 24647863 + | 4  | 2525 | 7.18 |
| LOC_Os01g62440.3 | ribonuclease protein, putative, expressed                                                   | Chr1  | 36138699 | 36146302 - | 13 | 3570 | 7.19 |
| LOC_Os06g13050.1 | peroxidase family protein, expressed                                                        | Chr6  | 7148961  | 7158822 -  | 18 | 3108 | 7.19 |
| LOC_Os12g29340.1 | expressed protein                                                                           | Chr12 | 17406189 | 17413878 - | 2  | 1263 | 7.19 |
| LOC_Os03g55090.1 | alpha-glucan phosphorylase isozyme, putative, expressed                                     | Chr3  | 31332396 | 31339163 - | 15 | 3335 | 7.19 |
| LOC_Os05g30340.1 | expressed protein                                                                           | Chr5  | 17581259 | 17588207 + | 6  | 2029 | 7.19 |
| LOC_Os03g43990.1 | BTBN8 - Bric-a-Brac, Tramtrack, Broad Complex BTB domain with non-phototropic hypocotyl 3 N | Chr3  | 24701180 | 24706728 - | 4  | 2822 | 7.19 |
| LOC_Os02g55020.1 | uncharacterized PPR-repeat protein, putative, expressed                                     | Chr2  | 33706516 | 33708848 + | 2  | 2283 | 7.19 |
| LOC_Os01g02080.1 | peptidyl-prolyl cis-trans isomerase, putative, expressed                                    | Chr1  | 586414   | 587780 -   | 2  | 1298 | 7.20 |
| LOC_Os06g49310.1 | MATE efflux family protein, putative, expressed                                             | Chr6  | 29877099 | 29885249 + | 11 | 4312 | 7.20 |
| LOC_Os12g22030.2 | serine hydroxymethyltransferase, mitochondrial precursor, putative, expressed               | Chr12 | 12392727 | 12396628 - | 4  | 2095 | 7.20 |
| LOC_Os12g22030.1 | serine hydroxymethyltransferase, mitochondrial precursor, putative, expressed               | Chr12 | 12392727 | 12396638 - | 4  | 2114 | 7.20 |
| LOC_Os11g32880.1 | DEAD-box ATP-dependent RNA helicase, putative, expressed                                    | Chr11 | 19421481 | 19429665 - | 15 | 3691 | 7.20 |
| LOC_Os11g32880.3 | DEAD-box ATP-dependent RNA helicase, putative, expressed                                    | Chr11 | 19421481 | 19429665 - | 15 | 3708 | 7.20 |
| LOC_Os03g05520.1 | nicotiana lesion-inducing like, putative, expressed                                         | Chr3  | 2739454  | 2743124 -  | 5  | 1184 | 7.20 |
| LOC_Os03g61680.1 | huntingtin-interacting protein HYPK, putative, expressed                                    | Chr3  | 34957020 | 34959386 - | 4  | 816  | 7.20 |
| LOC_Os06g02590.1 | DUF1336 domain containing protein, expressed                                                | Chr6  | 913779   | 921282 +   | 19 | 2570 | 7.20 |
| LOC_Os09g39700.1 | expressed protein                                                                           | Chr9  | 22778758 | 22783735 + | 9  | 2830 | 7.20 |
| LOC_Os01g63870.1 | nucleobase-ascorbate transporter, putative, expressed                                       | Chr1  | 37060600 | 37064615 + | 8  | 1959 | 7.21 |
| LOC_Os01g51800.1 | expressed protein                                                                           | Chr1  | 29783547 | 29785958 - | 3  | 1347 | 7.21 |
| LOC_Os07g40030.1 | WD domain, G-beta repeat domain containing protein, expressed                               | Chr7  | 24020377 | 24025145 + | 11 | 1831 | 7.21 |
| LOC_Os06g14190.1 | NF-X1-type zinc finger protein, putative, expressed                                         | Chr6  | 7920479  | 7924037 -  | 1  | 3591 | 7.21 |
| LOC_Os01g55890.2 | amino acid kinase, putative, expressed                                                      | Chr1  | 32185406 | 32189756 - | 12 | 1650 | 7.21 |
| LOC_Os01g55890.1 | amino acid kinase, putative, expressed                                                      | Chr1  | 32185406 | 32189756 - | 12 | 1673 | 7.21 |
| LOC_Os01g55890.3 | amino acid kinase, putative, expressed                                                      | Chr1  | 32185406 | 32189756 - | 11 | 1709 | 7.21 |
| LOC_Os03g34310.3 | expressed protein                                                                           | Chr3  | 19528037 | 19531714 + | 5  | 2207 | 7.22 |
| LOC_Os03g34310.1 | expressed protein                                                                           | Chr3  | 19528037 | 19531714 + | 6  | 2282 | 7.22 |
| LOC_Os07g47040.3 | expressed protein                                                                           | Chr7  | 28118147 | 28125354 + | 6  | 1621 | 7.22 |
| LOC_Os04g43430.1 | pentatricopeptide, putative, expressed                                                      | Chr4  | 25702074 | 25707506 - | 4  | 4650 | 7.22 |
| LOC_Os07g40030.3 | WD domain, G-beta repeat domain containing protein, expressed                               | Chr7  | 24020377 | 24025145 + | 10 | 1939 | 7.22 |
| LOC_Os06g04300.1 | tRNA 2-phosphotransferase 1, putative, expressed                                            | Chr6  | 1822766  | 1826383 -  | 7  | 1437 | 7.22 |
| LOC_Os04g45190.3 | MSP domain containing protein, expressed                                                    | Chr4  | 26712547 | 26715739 - | 8  | 1757 | 7.22 |
| LOC_Os07g47040.1 | expressed protein                                                                           | Chr7  | 28118073 | 28125357 + | 6  | 1706 | 7.22 |
| LOC_Os03g08730.1 | uroporphyrinogen III synthase, putative, expressed                                          | Chr3  | 4496729  | 4500873 +  | 10 | 1534 | 7.24 |

|                  |                                                                          |       |          |            |    |      |      |
|------------------|--------------------------------------------------------------------------|-------|----------|------------|----|------|------|
| LOC_Os02g56200.1 | ELMO/CED-12 family protein, putative, expressed                          | Chr2  | 34372386 | 34378382 - | 17 | 3821 | 7.24 |
| LOC_Os02g56200.2 | ELMO/CED-12 family protein, putative, expressed                          | Chr2  | 34372417 | 34378382 - | 16 | 3849 | 7.24 |
| LOC_Os12g42810.1 | mov34/MPN/PAD-1 family protein, expressed                                | Chr12 | 26599731 | 26604782 + | 11 | 2079 | 7.24 |
| LOC_Os05g34760.1 | expressed protein                                                        | Chr5  | 20620923 | 20628365 + | 10 | 3462 | 7.25 |
| LOC_Os01g54990.1 | auxin response factor, putative, expressed                               | Chr1  | 31617167 | 31623205 - | 11 | 3317 | 7.25 |
| LOC_Os01g72800.1 | signal recognition particle receptor, putative, expressed                | Chr1  | 42234584 | 42237458 - | 11 | 1697 | 7.25 |
| LOC_Os01g55890.6 | amino acid kinase, putative, expressed                                   | Chr1  | 32185406 | 32189756 - | 10 | 2617 | 7.25 |
| LOC_Os01g55890.5 | amino acid kinase, putative, expressed                                   | Chr1  | 32185406 | 32189756 - | 9  | 2653 | 7.25 |
| LOC_Os03g31160.1 | expressed protein                                                        | Chr3  | 17742055 | 17743913 + | 3  | 994  | 7.25 |
| LOC_Os04g39780.1 | AMP-binding enzyme family protein, expressed                             | Chr4  | 23698662 | 23707348 - | 7  | 7676 | 7.26 |
| LOC_Os09g12270.1 | peptidyl-prolyl cis-trans isomerase, FKBP-type, putative, expressed      | Chr9  | 6990893  | 6994473 +  | 10 | 2077 | 7.26 |
| LOC_Os05g34760.2 | expressed protein                                                        | Chr5  | 20620921 | 20628365 + | 9  | 3965 | 7.26 |
| LOC_Os05g41530.1 | ZOS5-11 - C2H2 zinc finger protein, expressed                            | Chr5  | 24312853 | 24317067 + | 7  | 1908 | 7.26 |
| LOC_Os02g38130.1 | no apical meristem protein, putative, expressed                          | Chr2  | 23062842 | 23066549 - | 6  | 2055 | 7.26 |
| LOC_Os08g03840.2 | expressed protein                                                        | Chr8  | 1833558  | 1836634 +  | 5  | 2024 | 7.26 |
| LOC_Os05g49240.1 | homeodomain-related, putative, expressed                                 | Chr5  | 28253514 | 28255081 + | 2  | 716  | 7.26 |
| LOC_Os07g47040.2 | expressed protein                                                        | Chr7  | 28120634 | 28125354 + | 5  | 1525 | 7.26 |
| LOC_Os03g31160.2 | expressed protein                                                        | Chr3  | 17742055 | 17742902 + | 2  | 813  | 7.27 |
| LOC_Os10g38206.1 | NADPH-dependent oxidoreductase, putative, expressed                      | Chr10 | 20464121 | 20464483 + | 1  | 395  | 7.27 |
| LOC_Os04g08800.1 | expressed protein                                                        | Chr4  | 4816607  | 4822779 -  | 2  | 982  | 7.27 |
| LOC_Os05g29880.2 | 3-hydroxyacyl-CoA dehydrogenase, putative, expressed                     | Chr5  | 17289209 | 17296341 + | 18 | 3106 | 7.27 |
| LOC_Os01g34330.2 | BAH domain containing protein, expressed                                 | Chr1  | 18923609 | 18939279 + | 8  | 2641 | 7.27 |
| LOC_Os01g34330.1 | BAH domain containing protein, expressed                                 | Chr1  | 18923606 | 18939279 + | 8  | 2675 | 7.27 |
| LOC_Os07g41720.1 | nuclear transcription factor Y subunit, putative, expressed              | Chr7  | 24996724 | 25001218 - | 7  | 1655 | 7.27 |
| LOC_Os11g03470.3 | bifunctional aspartokinase/homoserine dehydrogenase, putative, expressed | Chr11 | 1329410  | 1333415 -  | 12 | 1812 | 7.28 |
| LOC_Os11g03470.4 | bifunctional aspartokinase/homoserine dehydrogenase, putative, expressed | Chr11 | 1329410  | 1333415 -  | 12 | 1699 | 7.28 |
| LOC_Os10g36530.2 | mutS domain V family protein, expressed                                  | Chr10 | 19541307 | 19549097 + | 20 | 3643 | 7.28 |
| LOC_Os01g42234.1 | amino acid permease family protein, putative, expressed                  | Chr1  | 23923718 | 23933451 + | 8  | 2263 | 7.28 |
| LOC_Os01g42234.2 | amino acid permease family protein, putative, expressed                  | Chr1  | 23929691 | 23933451 + | 8  | 2257 | 7.28 |
| LOC_Os04g38620.1 | NAP domain containing protein, putative, expressed                       | Chr4  | 22943177 | 22946878 - | 10 | 1564 | 7.28 |
| LOC_Os02g47744.3 | MYB family transcription factor, putative, expressed                     | Chr2  | 29190320 | 29195573 + | 3  | 3543 | 7.28 |
| LOC_Os03g44580.3 | DNA binding protein, putative, expressed                                 | Chr3  | 25101780 | 25104599 - | 2  | 2330 | 7.29 |
| LOC_Os02g35039.1 | NAD dependent epimerase/dehydratase family protein, putative, expressed  | Chr2  | 21027729 | 21038863 + | 10 | 1654 | 7.29 |
| LOC_Os04g11890.1 | OsFBX121 - F-box domain containing protein, expressed                    | Chr4  | 6520533  | 6522270 -  | 2  | 1692 | 7.29 |
| LOC_Os01g55890.4 | amino acid kinase, putative, expressed                                   | Chr1  | 32185406 | 32189756 - | 11 | 1883 | 7.29 |
| LOC_Os02g49360.1 | RNA methyltransferase domain-containing protein 2, putative, expressed   | Chr2  | 30159132 | 30161718 + | 3  | 1601 | 7.29 |
| LOC_Os02g35039.2 | NAD dependent epimerase/dehydratase family protein, putative, expressed  | Chr2  | 21027729 | 21038863 + | 9  | 1695 | 7.29 |
| LOC_Os02g47744.1 | MYB family transcription factor, putative, expressed                     | Chr2  | 29190320 | 29195573 + | 2  | 3974 | 7.29 |
| LOC_Os11g03470.1 | bifunctional aspartokinase/homoserine dehydrogenase, putative, expressed | Chr11 | 1329410  | 1333415 -  | 13 | 1877 | 7.29 |
| LOC_Os11g03470.2 | bifunctional aspartokinase/homoserine dehydrogenase, putative, expressed | Chr11 | 1329410  | 1333415 -  | 13 | 1874 | 7.29 |
| LOC_Os11g06740.1 | syntaxin 6, putative, expressed                                          | Chr11 | 3290806  | 3293567 +  | 7  | 1239 | 7.29 |
| LOC_Os03g49220.1 | adenylosuccinate synthetase, chloroplast precursor, putative, expressed  | Chr3  | 28035486 | 28038970 + | 4  | 1892 | 7.30 |
| LOC_Os03g29810.1 | OsClp6 - Putative Clp protease homologue, expressed                      | Chr3  | 16994268 | 16997742 + | 9  | 1602 | 7.30 |
| LOC_Os07g44050.2 | expressed protein                                                        | Chr7  | 26325092 | 26326643 - | 3  | 1290 | 7.30 |
| LOC_Os05g35190.1 | powdery mildew resistant protein 5, putative, expressed                  | Chr5  | 20894101 | 20897891 + | 4  | 2081 | 7.30 |

|                  |                                                                            |       |          |            |    |      |      |
|------------------|----------------------------------------------------------------------------|-------|----------|------------|----|------|------|
| LOC_Os01g34080.1 | armadillo/beta-catenin-like repeat family protein, expressed               | Chr1  | 18763270 | 18774476 + | 10 | 3861 | 7.30 |
| LOC_Os02g32760.1 | 60S acidic ribosomal protein, putative, expressed                          | Chr2  | 19455122 | 19458350 - | 4  | 847  | 7.30 |
| LOC_Os07g41720.2 | nuclear transcription factor Y subunit, putative, expressed                | Chr7  | 24996724 | 25001220 - | 7  | 1788 | 7.30 |
| LOC_Os01g47256.3 | exosome complex exonuclease RRP40, putative, expressed                     | Chr1  | 27004253 | 27008003 + | 9  | 2121 | 7.30 |
| LOC_Os03g57120.2 | ferredoxin--NADP reductase, chloroplast precursor, putative, expressed     | Chr3  | 32566458 | 32569616 - | 5  | 2194 | 7.31 |
| LOC_Os03g57120.1 | ferredoxin--NADP reductase, chloroplast precursor, putative, expressed     | Chr3  | 32566457 | 32569616 - | 6  | 1986 | 7.31 |
| LOC_Os03g49220.2 | adenylosuccinate synthetase, chloroplast precursor, putative, expressed    | Chr3  | 28035486 | 28038970 + | 4  | 1933 | 7.31 |
| LOC_Os01g42000.1 | skin secretory protein xP2 precursor, putative, expressed                  | Chr1  | 23812709 | 23814712 + | 1  | 2036 | 7.31 |
| LOC_Os06g06560.1 | starch synthase, putative, expressed                                       | Chr6  | 3079059  | 3086808 -  | 15 | 3340 | 7.31 |
| LOC_Os03g51270.1 | OsFBX108 - F-box domain containing protein, expressed                      | Chr3  | 29328821 | 29336560 - | 7  | 3409 | 7.31 |
| LOC_Os01g12670.4 | expressed protein                                                          | Chr1  | 6979613  | 6984302 +  | 9  | 2323 | 7.31 |
| LOC_Os03g62550.1 | retrotransposon protein, putative, unclassified, expressed                 | Chr3  | 35414074 | 35416036 + | 2  | 1932 | 7.32 |
| LOC_Os05g44190.1 | expressed protein                                                          | Chr5  | 25677594 | 25682600 + | 3  | 3809 | 7.32 |
| LOC_Os11g11210.1 | OsClp12 - Putative Clp protease homologue, expressed                       | Chr11 | 6201169  | 6204659 -  | 7  | 1292 | 7.32 |
| LOC_Os03g44580.1 | DNA binding protein, putative, expressed                                   | Chr3  | 25102494 | 25104610 - | 1  | 2149 | 7.32 |
| LOC_Os10g36530.1 | mutS domain V family protein, expressed                                    | Chr10 | 19541307 | 19549097 + | 19 | 3889 | 7.32 |
| LOC_Os01g24920.1 | poly synthetase 2-B, putative, expressed                                   | Chr1  | 14031364 | 14038788 + | 13 | 1824 | 7.32 |
| LOC_Os02g32730.1 | neutral/alkaline invertase, putative, expressed                            | Chr2  | 19437743 | 19442103 + | 7  | 2476 | 7.32 |
| LOC_Os04g48730.2 | expressed protein                                                          | Chr4  | 29065880 | 29069212 + | 6  | 1675 | 7.33 |
| LOC_Os02g43560.1 | WRKY34, expressed                                                          | Chr2  | 26280253 | 26283914 - | 3  | 3590 | 7.33 |
| LOC_Os07g16040.1 | erythronate-4-phosphate dehydrogenase domain containing protein, expressed | Chr7  | 9353041  | 9357789 +  | 10 | 1834 | 7.33 |
| LOC_Os01g73005.1 | expressed protein                                                          | Chr1  | 42358083 | 42360654 - | 11 | 1814 | 7.33 |
| LOC_Os05g48870.6 | auxin response factor 15, putative, expressed                              | Chr5  | 28038009 | 28039890 - | 4  | 1736 | 7.34 |
| LOC_Os05g48870.9 | auxin response factor 15, putative, expressed                              | Chr5  | 28038009 | 28039890 + | 4  | 1740 | 7.34 |
| LOC_Os12g02910.1 | glycosyl transferase, family 8, putative, expressed                        | Chr12 | 1069974  | 1075419 -  | 10 | 3266 | 7.34 |
| LOC_Os08g08860.1 | CRS2-associated factor 2, mitochondrial precursor, putative, expressed     | Chr8  | 5146984  | 5150352 -  | 5  | 2231 | 7.35 |
| LOC_Os02g06300.1 | GTP-binding protein lepA, putative, expressed                              | Chr2  | 3143758  | 3152627 -  | 22 | 3527 | 7.35 |
| LOC_Os01g15660.2 | NAD dependent epimerase/dehydratase family protein, putative, expressed    | Chr1  | 8810657  | 8813097 +  | 3  | 1715 | 7.35 |
| LOC_Os05g48870.5 | auxin response factor 15, putative, expressed                              | Chr5  | 28038009 | 28039900 + | 4  | 1779 | 7.35 |
| LOC_Os01g73160.1 | 40S ribosomal protein S10, putative, expressed                             | Chr1  | 42425424 | 42427258 - | 5  | 700  | 7.35 |
| LOC_Os05g48870.7 | auxin response factor 15, putative, expressed                              | Chr5  | 28038009 | 28039900 + | 3  | 1819 | 7.36 |
| LOC_Os04g46100.1 | expressed protein                                                          | Chr4  | 27318314 | 27323409 - | 6  | 2283 | 7.36 |
| LOC_Os05g48870.8 | auxin response factor 15, putative, expressed                              | Chr5  | 28038009 | 28039890 + | 2  | 1863 | 7.36 |
| LOC_Os05g02670.3 | kinesin motor domain containing protein, putative, expressed               | Chr5  | 940426   | 947009 +   | 23 | 4452 | 7.36 |
| LOC_Os05g02670.1 | kinesin motor domain containing protein, putative, expressed               | Chr5  | 940429   | 947009 +   | 23 | 4453 | 7.36 |
| LOC_Os04g48730.1 | expressed protein                                                          | Chr4  | 29065880 | 29069212 + | 7  | 1800 | 7.36 |
| LOC_Os04g48730.3 | expressed protein                                                          | Chr4  | 29065880 | 29069212 + | 6  | 1852 | 7.36 |
| LOC_Os01g15660.1 | NAD dependent epimerase/dehydratase family protein, putative, expressed    | Chr1  | 8809544  | 8813097 +  | 8  | 1525 | 7.37 |
| LOC_Os07g44050.1 | expressed protein                                                          | Chr7  | 26325092 | 26326643 - | 2  | 1533 | 7.37 |
| LOC_Os06g48700.1 | DNA binding protein, putative, expressed                                   | Chr6  | 29462262 | 29467332 - | 11 | 2289 | 7.37 |
| LOC_Os05g02670.2 | kinesin motor domain containing protein, putative, expressed               | Chr5  | 940429   | 947009 +   | 24 | 4571 | 7.37 |
| LOC_Os10g35240.1 | Rf1, mitochondrial precursor, putative, expressed                          | Chr10 | 18833387 | 18836046 - | 1  | 2692 | 7.38 |
| LOC_Os01g22660.3 | GDSL-like lipase/acylhydrolase, putative, expressed                        | Chr1  | 12742056 | 12745509 + | 5  | 1615 | 7.38 |
| LOC_Os04g44300.2 | transposon protein, putative, unclassified, expressed                      | Chr4  | 26236222 | 26240651 - | 7  | 3034 | 7.38 |
| LOC_Os02g09420.1 | cyclase family protein, putative, expressed                                | Chr2  | 4831146  | 4835216 +  | 6  | 1341 | 7.39 |

|                  |                                                                                     |       |          |            |    |      |      |
|------------------|-------------------------------------------------------------------------------------|-------|----------|------------|----|------|------|
| LOC_Os04g55970.1 | AP2-like ethylene-responsive transcription factor AINTEGUMENTA, putative, expressed | Chr4  | 33341978 | 33346562 + | 8  | 2440 | 7.39 |
| LOC_Os04g55970.2 | AP2-like ethylene-responsive transcription factor AINTEGUMENTA, putative, expressed | Chr4  | 33341978 | 33346562 + | 8  | 2433 | 7.39 |
| LOC_Os06g40490.1 | glycosyl hydrolases family 17, putative, expressed                                  | Chr6  | 24127167 | 24130368 + | 3  | 2099 | 7.39 |
| LOC_Os11g22404.1 | protein phosphatase 2C, putative, expressed                                         | Chr11 | 12855016 | 12861914 + | 5  | 2319 | 7.40 |
| LOC_Os01g42960.1 | TTL1, putative, expressed                                                           | Chr1  | 24461037 | 24465044 + | 7  | 3077 | 7.41 |
| LOC_Os01g52214.1 | ubiquinone oxidoreductase, putative, expressed                                      | Chr1  | 30020917 | 30023812 - | 2  | 1083 | 7.41 |
| LOC_Os01g15660.3 | NAD dependent epimerase/dehydratase family protein, putative, expressed             | Chr1  | 8809361  | 8813097 +  | 5  | 2731 | 7.41 |
| LOC_Os05g22990.1 | expressed protein                                                                   | Chr5  | 13106577 | 13115821 - | 13 | 3558 | 7.41 |
| LOC_Os01g43100.1 | protein phosphatase 2C, putative, expressed                                         | Chr1  | 24584654 | 24589423 + | 8  | 1542 | 7.41 |
| LOC_Os04g44300.1 | transposon protein, putative, unclassified, expressed                               | Chr4  | 26236216 | 26240651 - | 6  | 3116 | 7.42 |
| LOC_Os12g38590.1 | pumilio-family RNA binding repeat containing protein, expressed                     | Chr12 | 23703442 | 23712907 + | 9  | 4431 | 7.42 |
| LOC_Os05g02310.1 | soluble inorganic pyrophosphatase, putative, expressed                              | Chr5  | 739646   | 742966 -   | 9  | 1466 | 7.43 |
| LOC_Os06g45330.1 | endonuclease V, putative, expressed                                                 | Chr6  | 27397474 | 27400410 - | 7  | 1917 | 7.43 |
| LOC_Os11g14170.1 | OsDegp12 - Putative Deg protease homologue, expressed                               | Chr11 | 7909213  | 7917123 +  | 10 | 2003 | 7.43 |
| LOC_Os03g19930.1 | adenylosuccinate lyase, putative, expressed                                         | Chr3  | 11210766 | 11214946 + | 10 | 2410 | 7.43 |
| LOC_Os03g19930.4 | adenylosuccinate lyase, putative, expressed                                         | Chr3  | 11210759 | 11214946 + | 9  | 2462 | 7.43 |
| LOC_Os03g19930.3 | adenylosuccinate lyase, putative, expressed                                         | Chr3  | 11210759 | 11214946 + | 9  | 2466 | 7.43 |
| LOC_Os04g16940.1 | transposon protein, putative, CACTA, En/Spm sub-class, expressed                    | Chr4  | 9262696  | 9265370 -  | 5  | 1924 | 7.43 |
| LOC_Os06g04530.1 | OsClp9 - Putative Clp protease homologue, expressed                                 | Chr6  | 1949424  | 1953325 +  | 9  | 1606 | 7.44 |
| LOC_Os06g35540.1 | aminotransferase, classes I and II, domain containing protein, expressed            | Chr6  | 20727092 | 20731771 - | 10 | 2194 | 7.44 |
| LOC_Os11g06410.3 | homeodomain, putative, expressed                                                    | Chr11 | 3091513  | 3096323 +  | 3  | 1946 | 7.44 |
| LOC_Os01g67490.1 | OTU-like cysteine protease family protein, putative, expressed                      | Chr1  | 39216579 | 39219456 - | 6  | 1764 | 7.44 |
| LOC_Os01g56969.1 | homeobox-leucine zipper protein ATHB-54, putative, expressed                        | Chr1  | 32900891 | 32902628 - | 2  | 889  | 7.44 |
| LOC_Os10g39820.1 | zinc knuckle domain containing protein, expressed                                   | Chr10 | 21311579 | 21315431 - | 4  | 1633 | 7.44 |
| LOC_Os11g31680.1 | retrotransposon protein, putative, unclassified, expressed                          | Chr11 | 18526033 | 18541221 - | 23 | 5338 | 7.44 |
| LOC_Os11g06410.2 | homeodomain, putative, expressed                                                    | Chr11 | 3091549  | 3096323 +  | 4  | 2021 | 7.44 |
| LOC_Os09g25260.1 | protein binding protein, putative, expressed                                        | Chr9  | 15126331 | 15129037 + | 3  | 1439 | 7.45 |
| LOC_Os11g13620.1 | expressed protein                                                                   | Chr11 | 7460403  | 7461781 +  | 1  | 1411 | 7.45 |
| LOC_Os02g47600.1 | soluble inorganic pyrophosphatase, putative, expressed                              | Chr2  | 29081821 | 29086715 - | 9  | 1440 | 7.45 |
| LOC_Os04g26834.1 | eukaryotic aspartyl protease domain containing protein, expressed                   | Chr4  | 15844553 | 15853785 - | 11 | 2395 | 7.45 |
| LOC_Os02g10820.1 | Sel1 repeat domain containing protein, putative, expressed                          | Chr2  | 5744792  | 5748141 -  | 8  | 1582 | 7.45 |
| LOC_Os02g37920.1 | expressed protein                                                                   | Chr2  | 22917816 | 22924489 - | 12 | 3877 | 7.46 |
| LOC_Os06g36940.1 | expressed protein                                                                   | Chr6  | 21763118 | 21765044 - | 2  | 1442 | 7.46 |
| LOC_Os06g02500.1 | superoxide dismutase, chloroplast, putative, expressed                              | Chr6  | 864273   | 866968 -   | 8  | 2007 | 7.46 |
| LOC_Os12g32820.1 | pleiotropic drug resistance protein 3, putative, expressed                          | Chr12 | 19832726 | 19837081 - | 13 | 3123 | 7.46 |
| LOC_Os01g67490.2 | OTU-like cysteine protease family protein, putative, expressed                      | Chr1  | 39216698 | 39219456 - | 6  | 1665 | 7.46 |
| LOC_Os02g14929.1 | T-complex protein, putative, expressed                                              | Chr2  | 8326083  | 8343178 -  | 14 | 2462 | 7.46 |
| LOC_Os09g29404.2 | glycogen operon protein glgX, putative, expressed                                   | Chr9  | 17851430 | 17863822 - | 12 | 2804 | 7.47 |
| LOC_Os07g01540.1 | Ser/Thr protein phosphatase family protein, putative, expressed                     | Chr7  | 335223   | 343722 -   | 16 | 4176 | 7.47 |
| LOC_Os11g06410.1 | homeodomain, putative, expressed                                                    | Chr11 | 3091535  | 3096323 +  | 3  | 2965 | 7.47 |
| LOC_Os09g29404.3 | glycogen operon protein glgX, putative, expressed                                   | Chr9  | 17851430 | 17864490 - | 14 | 3193 | 7.47 |
| LOC_Os06g12600.1 | kinase, pfkB family, putative, expressed                                            | Chr6  | 6842811  | 6848564 +  | 7  | 1864 | 7.48 |
| LOC_Os03g04140.1 | serine acetyltransferase protein, putative, expressed                               | Chr3  | 1892824  | 1897309 -  | 10 | 2016 | 7.48 |
| LOC_Os02g12730.1 | beta-galactosidase precursor, putative, expressed                                   | Chr2  | 6655774  | 6660984 -  | 17 | 3713 | 7.48 |
| LOC_Os01g10100.1 | expressed protein                                                                   | Chr1  | 5263424  | 5266102 -  | 6  | 1327 | 7.48 |

|                  |                                                                                           |       |          |            |    |      |      |
|------------------|-------------------------------------------------------------------------------------------|-------|----------|------------|----|------|------|
| LOC_Os02g12730.3 | beta-galactosidase precursor, putative, expressed                                         | Chr2  | 6655774  | 6660984 -  | 16 | 3769 | 7.48 |
| LOC_Os01g14920.1 | zinc knuckle family protein, putative, expressed                                          | Chr1  | 8359014  | 8362270 -  | 3  | 1321 | 7.49 |
| LOC_Os09g39034.2 | expressed protein                                                                         | Chr9  | 22405455 | 22414370 - | 11 | 2373 | 7.49 |
| LOC_Os07g08180.2 | PPR repeat containing protein, expressed                                                  | Chr7  | 4156226  | 4160559 +  | 4  | 2825 | 7.49 |
| LOC_Os03g04140.2 | serine acetyltransferase protein, putative, expressed                                     | Chr3  | 1892824  | 1897309 -  | 11 | 2156 | 7.49 |
| LOC_Os01g70100.1 | zinc finger DHHC domain-containing protein, putative, expressed                           | Chr1  | 40566660 | 40569777 - | 5  | 2005 | 7.49 |
| LOC_Os01g51430.1 | green ripe-like, putative, expressed                                                      | Chr1  | 29572653 | 29575706 + | 3  | 1285 | 7.49 |
| LOC_Os07g22640.3 | lipid binding protein, putative, expressed                                                | Chr7  | 12753194 | 12760678 + | 5  | 1479 | 7.49 |
| LOC_Os05g43576.1 | radical SAM enzyme, putative, expressed                                                   | Chr5  | 25343800 | 25346261 + | 7  | 1703 | 7.49 |
| LOC_Os06g44840.2 | prenyltransferase, putative, expressed                                                    | Chr6  | 27087517 | 27092918 + | 12 | 1991 | 7.50 |
| LOC_Os05g26820.1 | CAMK_KIN1/SNF1/Nim1_like.20 - CAMK includes calcium/calmodulin dependent protein kinases, | Chr5  | 15556059 | 15560409 + | 2  | 2175 | 7.50 |
| LOC_Os03g34310.4 | expressed protein                                                                         | Chr3  | 19528037 | 19531714 + | 5  | 2608 | 7.50 |
| LOC_Os11g29700.3 | expressed protein                                                                         | Chr11 | 17210644 | 17212826 - | 6  | 936  | 7.51 |
| LOC_Os05g46450.1 | fiber protein Fb11, putative, expressed                                                   | Chr5  | 26907723 | 26910953 - | 3  | 855  | 7.51 |
| LOC_Os09g39034.1 | expressed protein                                                                         | Chr9  | 22405458 | 22414370 - | 11 | 2385 | 7.51 |
| LOC_Os03g03140.1 | RNA recognition motif containing protein, putative, expressed                             | Chr3  | 1322549  | 1324485 +  | 3  | 1357 | 7.51 |
| LOC_Os06g04330.1 | expressed protein                                                                         | Chr6  | 1838557  | 1842840 -  | 7  | 1885 | 7.51 |
| LOC_Os06g04330.2 | expressed protein                                                                         | Chr6  | 1838557  | 1842840 -  | 6  | 1935 | 7.51 |
| LOC_Os09g29404.1 | glycogen operon protein glgX, putative, expressed                                         | Chr9  | 17857352 | 17868669 - | 23 | 4179 | 7.51 |
| LOC_Os01g67490.3 | OTU-like cysteine protease family protein, putative, expressed                            | Chr1  | 39216661 | 39219456 - | 5  | 1774 | 7.52 |
| LOC_Os01g10100.2 | expressed protein                                                                         | Chr1  | 5263422  | 5266102 -  | 5  | 1524 | 7.52 |
| LOC_Os12g42230.1 | transketolase, putative, expressed                                                        | Chr12 | 26200179 | 26203631 + | 3  | 1793 | 7.52 |
| LOC_Os01g67570.1 | PDE312/PTAC10, putative, expressed                                                        | Chr1  | 39270532 | 39274996 - | 12 | 2647 | 7.52 |
| LOC_Os03g14050.1 | thaumatin-like protein 1 precursor, putative, expressed                                   | Chr3  | 7626461  | 7629682 +  | 3  | 2066 | 7.52 |
| LOC_Os12g26870.1 | retrotransposon protein, putative, Ty3-gypsy subclass, expressed                          | Chr12 | 15748917 | 15751684 - | 3  | 2070 | 7.52 |
| LOC_Os02g07740.1 | RNA binding protein, putative, expressed                                                  | Chr2  | 4034222  | 4038406 +  | 8  | 1934 | 7.52 |
| LOC_Os07g37010.2 | cyclin, putative, expressed                                                               | Chr7  | 22169511 | 22171723 - | 6  | 1634 | 7.53 |
| LOC_Os07g37010.1 | cyclin, putative, expressed                                                               | Chr7  | 22169511 | 22171932 - | 6  | 1852 | 7.53 |
| LOC_Os06g44840.1 | prenyltransferase, putative, expressed                                                    | Chr6  | 27087455 | 27092919 + | 13 | 2196 | 7.53 |
| LOC_Os02g01030.2 | tetratricopeptide repeat domain containing protein, expressed                             | Chr2  | 14069    | 18598 +    | 10 | 2000 | 7.53 |
| LOC_Os02g01030.1 | tetratricopeptide repeat domain containing protein, expressed                             | Chr2  | 14061    | 18598 +    | 10 | 2011 | 7.53 |
| LOC_Os02g01030.4 | tetratricopeptide repeat domain containing protein, expressed                             | Chr2  | 14061    | 18598 +    | 9  | 2067 | 7.53 |
| LOC_Os01g33030.1 | Brix domain containing protein, putative, expressed                                       | Chr1  | 18140743 | 18142908 - | 6  | 1614 | 7.53 |
| LOC_Os02g30955.1 | expressed protein                                                                         | Chr2  | 18494382 | 18495143 - | 1  | 794  | 7.54 |
| LOC_Os07g08180.1 | PPR repeat containing protein, expressed                                                  | Chr7  | 4156203  | 4159791 +  | 1  | 3621 | 7.54 |
| LOC_Os11g11410.4 | OslAA27 - Auxin-responsive Aux/IAA gene family member, expressed                          | Chr11 | 6340137  | 6342304 +  | 4  | 847  | 7.54 |
| LOC_Os12g43363.1 | fatty acid hydroxylase, putative, expressed                                               | Chr12 | 26902155 | 26905925 + | 7  | 1652 | 7.55 |
| LOC_Os12g43363.3 | fatty acid hydroxylase, putative, expressed                                               | Chr12 | 26902155 | 26905925 + | 7  | 1661 | 7.55 |
| LOC_Os12g43363.2 | fatty acid hydroxylase, putative, expressed                                               | Chr12 | 26902152 | 26905925 + | 7  | 1671 | 7.55 |
| LOC_Os06g39480.1 | SPOC domain containing protein, putative, expressed                                       | Chr6  | 23442839 | 23449453 - | 6  | 3812 | 7.55 |
| LOC_Os01g72210.1 | early-responsive to dehydration protein-related, putative, expressed                      | Chr1  | 41869930 | 41874402 + | 10 | 3227 | 7.55 |
| LOC_Os01g72210.2 | early-responsive to dehydration protein-related, putative, expressed                      | Chr1  | 41869930 | 41874556 + | 10 | 3388 | 7.55 |
| LOC_Os12g42300.1 | potassium efflux antiporter protein, putative, expressed                                  | Chr12 | 26299853 | 26306151 - | 18 | 3899 | 7.55 |
| LOC_Os02g35620.1 | expressed protein                                                                         | Chr2  | 21419921 | 21422365 - | 1  | 2477 | 7.55 |
| LOC_Os03g34310.5 | expressed protein                                                                         | Chr3  | 19528037 | 19531693 + | 2  | 3469 | 7.56 |

|                  |                                                                                         |       |          |            |    |      |      |
|------------------|-----------------------------------------------------------------------------------------|-------|----------|------------|----|------|------|
| LOC_Os04g51280.1 | DAG protein, chloroplast precursor, putative, expressed                                 | Chr4  | 30377262 | 30379530 + | 4  | 1084 | 7.56 |
| LOC_Os06g10280.1 | CDP-alcohol phosphatidyltransferase, putative, expressed                                | Chr6  | 5276590  | 5285926 -  | 18 | 2344 | 7.56 |
| LOC_Os09g25260.2 | protein binding protein, putative, expressed                                            | Chr9  | 15126250 | 15128929 + | 2  | 2660 | 7.56 |
| LOC_Os11g11410.1 | OsIAA27 - Auxin-responsive Aux/IAA gene family member, expressed                        | Chr11 | 6335893  | 6342309 +  | 5  | 1695 | 7.56 |
| LOC_Os08g10470.2 | histone-lysine N-methyltransferase ASHR2, putative, expressed                           | Chr8  | 6155162  | 6157813 +  | 2  | 1754 | 7.56 |
| LOC_Os08g10470.1 | histone-lysine N-methyltransferase ASHR2, putative, expressed                           | Chr8  | 6155162  | 6157815 +  | 2  | 1760 | 7.56 |
| LOC_Os11g11020.1 | DAG protein, chloroplast precursor, putative, expressed                                 | Chr11 | 6087979  | 6091482 -  | 5  | 1717 | 7.57 |
| LOC_Os02g10810.1 | protein of unknown function domain containing protein, expressed                        | Chr2  | 5740408  | 5742520 -  | 5  | 1030 | 7.57 |
| LOC_Os02g58150.1 | expressed protein                                                                       | Chr2  | 35584961 | 35589249 + | 2  | 1588 | 7.57 |
| LOC_Os06g42730.1 | OsPOP14 - Putative Prolyl Oligopeptidase homologue, expressed                           | Chr6  | 25698741 | 25702801 + | 6  | 1752 | 7.57 |
| LOC_Os02g35150.1 | splicing factor U2AF, putative, expressed                                               | Chr2  | 21110728 | 21116484 + | 8  | 3098 | 7.57 |
| LOC_Os01g51754.3 | alpha-amylase precursor, putative, expressed                                            | Chr1  | 29762378 | 29766397 + | 5  | 2585 | 7.57 |
| LOC_Os10g07290.1 | glycosyl hydrolases family 17, putative, expressed                                      | Chr10 | 3849207  | 3851735 -  | 2  | 1861 | 7.57 |
| LOC_Os12g40300.1 | SKP1, putative, expressed                                                               | Chr12 | 24957948 | 24961239 + | 2  | 1010 | 7.58 |
| LOC_Os01g16290.2 | DNA gyrase subunit B, chloroplast/mitochondrial precursor, putative, expressed          | Chr1  | 9225213  | 9235012 +  | 17 | 2801 | 7.58 |
| LOC_Os12g07020.1 | 5-formyltetrahydrofolate cyclo-ligase, putative, expressed                              | Chr12 | 3431908  | 3437224 +  | 7  | 1788 | 7.58 |
| LOC_Os01g67720.3 | ABC1 family domain containing protein, putative, expressed                              | Chr1  | 39357455 | 39362884 - | 12 | 2316 | 7.58 |
| LOC_Os01g67720.1 | ABC1 family domain containing protein, putative, expressed                              | Chr1  | 39357455 | 39362884 - | 12 | 2320 | 7.58 |
| LOC_Os01g67720.2 | ABC1 family domain containing protein, putative, expressed                              | Chr1  | 39357455 | 39362884 - | 11 | 2366 | 7.58 |
| LOC_Os03g24940.2 | proline-rich family protein, putative, expressed                                        | Chr3  | 14213073 | 14220614 - | 13 | 2663 | 7.59 |
| LOC_Os03g24940.1 | proline-rich family protein, putative, expressed                                        | Chr3  | 14213073 | 14220683 - | 13 | 2716 | 7.59 |
| LOC_Os03g14050.2 | thaumatin-like protein 1 precursor, putative, expressed                                 | Chr3  | 7626455  | 7629682 +  | 2  | 3157 | 7.59 |
| LOC_Os03g59264.1 | calreticulin family protein, expressed                                                  | Chr3  | 33744357 | 33750440 - | 10 | 3866 | 7.59 |
| LOC_Os01g72820.5 | CRS1/YhbY domain containing protein, putative, expressed                                | Chr1  | 42240837 | 42245248 + | 6  | 2110 | 7.59 |
| LOC_Os01g64030.1 | OsFBL5 - F-box domain and LRR containing protein, expressed                             | Chr1  | 37190435 | 37197804 - | 4  | 2395 | 7.60 |
| LOC_Os05g35520.3 | deoxynucleoside kinase family, putative, expressed                                      | Chr5  | 21114280 | 21117398 + | 5  | 2065 | 7.60 |
| LOC_Os01g64030.3 | OsFBL5 - F-box domain and LRR containing protein, expressed                             | Chr1  | 37190435 | 37197804 - | 3  | 2458 | 7.60 |
| LOC_Os01g64030.2 | OsFBL5 - F-box domain and LRR containing protein, expressed                             | Chr1  | 37190435 | 37197804 - | 3  | 2469 | 7.60 |
| LOC_Os01g64030.4 | OsFBL5 - F-box domain and LRR containing protein, expressed                             | Chr1  | 37190435 | 37197804 - | 2  | 2575 | 7.60 |
| LOC_Os03g15120.1 | imidazole glycerol phosphate synthase hisHF, chloroplast precursor, putative, expressed | Chr3  | 8255433  | 8260811 -  | 17 | 2619 | 7.60 |
| LOC_Os05g41880.1 | mutS domain V family protein, expressed                                                 | Chr5  | 24522895 | 24532290 + | 20 | 2513 | 7.60 |
| LOC_Os05g41640.2 | phosphoglycerate kinase protein, putative, expressed                                    | Chr5  | 24378809 | 24381762 - | 6  | 2364 | 7.60 |
| LOC_Os03g49710.1 | ribosomal protein S13p/S18e, putative, expressed                                        | Chr3  | 28301288 | 28303246 + | 3  | 978  | 7.60 |
| LOC_Os04g50110.1 | RNA recognition motif containing protein, putative, expressed                           | Chr4  | 29888072 | 29891194 - | 5  | 1548 | 7.60 |
| LOC_Os05g47470.1 | VIP1 protein, putative, expressed                                                       | Chr5  | 27198354 | 27199393 + | 1  | 1072 | 7.61 |
| LOC_Os03g19930.2 | adenylosuccinate lyase, putative, expressed                                             | Chr3  | 11210759 | 11214946 + | 8  | 2886 | 7.61 |
| LOC_Os05g35520.2 | deoxynucleoside kinase family, putative, expressed                                      | Chr5  | 21112635 | 21117398 + | 6  | 1978 | 7.61 |
| LOC_Os07g06940.1 | valyl-tRNA synthetase, putative, expressed                                              | Chr7  | 3394839  | 3400179 +  | 13 | 2232 | 7.61 |
| LOC_Os06g02340.1 | OsFBX183 - F-box domain containing protein, expressed                                   | Chr6  | 779995   | 782325 +   | 2  | 1669 | 7.61 |
| LOC_Os05g35520.1 | deoxynucleoside kinase family, putative, expressed                                      | Chr5  | 21112585 | 21117398 + | 5  | 2177 | 7.61 |
| LOC_Os04g43922.1 | exosome complex exonuclease rrp4, putative, expressed                                   | Chr4  | 26036773 | 26041443 - | 7  | 1710 | 7.61 |
| LOC_Os05g47470.2 | VIP1 protein, putative, expressed                                                       | Chr5  | 27198351 | 27199581 + | 1  | 1263 | 7.61 |
| LOC_Os05g48200.1 | glutamate synthase, chloroplast precursor, putative, expressed                          | Chr5  | 27622654 | 27636451 + | 22 | 7630 | 7.62 |
| LOC_Os01g39840.2 | expressed protein                                                                       | Chr1  | 22471886 | 22474413 - | 2  | 2352 | 7.62 |
| LOC_Os12g07050.1 | RNA polymerase II subunit A C-terminal domain phosphatase ssu72, putative, expressed    | Chr12 | 3450066  | 3454059 -  | 4  | 1343 | 7.62 |

|                  |                                                                                      |       |          |            |    |      |      |
|------------------|--------------------------------------------------------------------------------------|-------|----------|------------|----|------|------|
| LOC_Os12g07050.3 | RNA polymerase II subunit A C-terminal domain phosphatase ssu72, putative, expressed | Chr12 | 3450066  | 3454059 -  | 3  | 1648 | 7.62 |
| LOC_Os02g52280.1 | expressed protein                                                                    | Chr2  | 32008014 | 32017071 + | 21 | 4477 | 7.63 |
| LOC_Os10g32550.1 | T-complex protein, putative, expressed                                               | Chr10 | 17048041 | 17053445 + | 18 | 2805 | 7.64 |
| LOC_Os07g15270.1 | RNA-binding region RNP-1, putative, expressed                                        | Chr7  | 8807273  | 8811507 +  | 3  | 3130 | 7.64 |
| LOC_Os05g09630.2 | homeobox domain containing protein, expressed                                        | Chr5  | 5441429  | 5445212 +  | 8  | 2605 | 7.65 |
| LOC_Os03g06510.1 | KIP1, putative, expressed                                                            | Chr3  | 3258437  | 3270596 +  | 8  | 8575 | 7.65 |
| LOC_Os03g11500.1 | DUF647 domain containing protein, putative, expressed                                | Chr3  | 5955623  | 5960605 -  | 13 | 1826 | 7.65 |
| LOC_Os01g37820.1 | oxidoreductase/ transition metal ion binding protein, putative, expressed            | Chr1  | 21151490 | 21155639 - | 7  | 1970 | 7.65 |
| LOC_Os02g02720.5 | SNARE domain containing protein, putative, expressed                                 | Chr2  | 1022071  | 1024751 -  | 7  | 1398 | 7.65 |
| LOC_Os02g02720.3 | SNARE domain containing protein, putative, expressed                                 | Chr2  | 1022071  | 1024751 -  | 7  | 1394 | 7.65 |
| LOC_Os07g33220.1 | BNR/Asp-box repeat family protein, putative, expressed                               | Chr7  | 19850984 | 19854472 + | 10 | 2067 | 7.65 |
| LOC_Os02g02720.4 | SNARE domain containing protein, putative, expressed                                 | Chr2  | 1022071  | 1024751 -  | 6  | 1444 | 7.65 |
| LOC_Os11g11410.3 | OsiAA27 - Auxin-responsive Aux/IAA gene family member, expressed                     | Chr11 | 6335893  | 6342309 +  | 3  | 2977 | 7.65 |
| LOC_Os11g11410.2 | OsiAA27 - Auxin-responsive Aux/IAA gene family member, expressed                     | Chr11 | 6335893  | 6342309 +  | 2  | 3048 | 7.65 |
| LOC_Os01g08510.1 | MAR-binding filament-like protein 1, putative, expressed                             | Chr1  | 4208553  | 4213302 -  | 3  | 2813 | 7.66 |
| LOC_Os12g04595.1 | transcription initiation factor, putative, expressed                                 | Chr12 | 1942163  | 1947980 -  | 10 | 1960 | 7.67 |
| LOC_Os03g01770.1 | rhodanese, putative, expressed                                                       | Chr3  | 482919   | 484763 -   | 3  | 825  | 7.68 |
| LOC_Os08g10649.1 | GTPase of unknown function domain containing protein, putative, expressed            | Chr8  | 6272214  | 6280922 +  | 9  | 2111 | 7.69 |
| LOC_Os06g04470.2 | expressed protein                                                                    | Chr6  | 1914141  | 1918036 -  | 6  | 1873 | 7.69 |
| LOC_Os06g04470.1 | expressed protein                                                                    | Chr6  | 1914141  | 1918055 -  | 7  | 1836 | 7.69 |
| LOC_Os06g04470.3 | expressed protein                                                                    | Chr6  | 1914141  | 1918036 -  | 7  | 1798 | 7.69 |
| LOC_Os09g34847.2 | expressed protein                                                                    | Chr9  | 20305822 | 20308168 + | 3  | 2199 | 7.69 |
| LOC_Os03g10930.1 | ribosomal protein L51, putative, expressed                                           | Chr3  | 5613250  | 5615478 -  | 4  | 1003 | 7.70 |
| LOC_Os03g10930.2 | ribosomal protein L51, putative, expressed                                           | Chr3  | 5613250  | 5615444 -  | 3  | 1014 | 7.70 |
| LOC_Os06g27970.1 | FKBP12-interacting protein of 37 kDa, putative, expressed                            | Chr6  | 15863214 | 15872704 - | 13 | 1840 | 7.71 |
| LOC_Os12g39660.1 | calcium-transporting ATPase, plasma membrane-type, putative, expressed               | Chr12 | 24485277 | 24490995 + | 7  | 3924 | 7.71 |
| LOC_Os01g56990.1 | Regulator of chromosome condensation domain containing protein, expressed            | Chr1  | 32929037 | 32932792 - | 8  | 1632 | 7.71 |
| LOC_Os02g03460.1 | phosphatidate cytidyltransferase, putative, expressed                                | Chr2  | 1406098  | 1409346 -  | 5  | 1249 | 7.72 |
| LOC_Os03g43850.1 | recA protein, putative, expressed                                                    | Chr3  | 24591390 | 24596469 + | 13 | 2029 | 7.72 |
| LOC_Os03g08000.1 | expressed protein                                                                    | Chr3  | 4090003  | 4094134 +  | 7  | 2072 | 7.72 |
| LOC_Os09g10820.1 | oxidoreductase domain protein, putative, expressed                                   | Chr9  | 5900633  | 5905440 +  | 12 | 1845 | 7.72 |
| LOC_Os01g72820.3 | CRS1/YhbY domain containing protein, putative, expressed                             | Chr1  | 42240786 | 42245248 + | 6  | 2313 | 7.73 |
| LOC_Os03g18620.1 | PPR repeat domain containing protein, putative, expressed                            | Chr3  | 10428927 | 10433732 + | 4  | 1460 | 7.73 |
| LOC_Os04g11524.1 | retrotransposon protein, putative, unclassified, expressed                           | Chr4  | 6306223  | 6309507 +  | 4  | 997  | 7.73 |
| LOC_Os04g39060.2 | CRS1/YhbY domain containing protein, expressed                                       | Chr4  | 23212145 | 23218087 - | 13 | 3728 | 7.74 |
| LOC_Os02g47600.2 | soluble inorganic pyrophosphatase, putative, expressed                               | Chr2  | 29081821 | 29085864 - | 9  | 1343 | 7.74 |
| LOC_Os03g43860.1 | SNF7 domain containing protein, putative, expressed                                  | Chr3  | 24596788 | 24600376 - | 11 | 1429 | 7.74 |
| LOC_Os04g39060.1 | CRS1/YhbY domain containing protein, expressed                                       | Chr4  | 23212145 | 23218087 - | 12 | 3766 | 7.74 |
| LOC_Os09g36030.1 | 4-hydroxy-2-oxovalerate aldolase, putative, expressed                                | Chr9  | 20750115 | 20751468 + | 1  | 1386 | 7.74 |
| LOC_Os01g16430.1 | cysteine proteinase inhibitor precursor protein, putative, expressed                 | Chr1  | 9325545  | 9329334 -  | 4  | 1380 | 7.75 |
| LOC_Os01g18280.1 | SNF7 domain containing protein, putative, expressed                                  | Chr1  | 10262946 | 10267962 + | 9  | 2099 | 7.75 |
| LOC_Os01g72880.1 | DNA mismatch repair protein Mlh1, putative, expressed                                | Chr1  | 42268880 | 42274913 + | 16 | 3135 | 7.76 |
| LOC_Os03g04970.1 | T-complex protein, putative, expressed                                               | Chr3  | 2401014  | 2406760 -  | 18 | 2845 | 7.76 |
| LOC_Os01g49380.2 | lipase, putative, expressed                                                          | Chr1  | 28384020 | 28387158 - | 8  | 1546 | 7.76 |
| LOC_Os01g49380.1 | lipase, putative, expressed                                                          | Chr1  | 28384020 | 28387158 - | 8  | 1556 | 7.76 |



|                  |                                                                                    |       |          |            |    |      |      |
|------------------|------------------------------------------------------------------------------------|-------|----------|------------|----|------|------|
| LOC_Os03g19920.1 | expressed protein                                                                  | Chr3  | 11199350 | 11205122 - | 10 | 2652 | 7.76 |
| LOC_Os04g58390.1 | allantoinase, putative, expressed                                                  | Chr4  | 34737984 | 34742719 + | 16 | 2454 | 7.77 |
| LOC_Os03g10420.1 | PPR repeat containing protein, expressed                                           | Chr3  | 5304975  | 5307365 +  | 1  | 2423 | 7.77 |
| LOC_Os03g61010.1 | protein kinase family protein, putative, expressed                                 | Chr3  | 34663343 | 34668223 + | 10 | 2381 | 7.77 |
| LOC_Os10g34370.1 | expressed protein                                                                  | Chr10 | 18318955 | 18320451 - | 1  | 1529 | 7.78 |
| LOC_Os01g07740.3 | DEAD-box ATP-dependent RNA helicase 14, putative, expressed                        | Chr1  | 3713687  | 3718637 -  | 14 | 3217 | 7.78 |
| LOC_Os03g55270.1 | TIP41, putative, expressed                                                         | Chr3  | 31454981 | 31458898 - | 8  | 2334 | 7.78 |
| LOC_Os01g73690.1 | pentatricopeptide, putative, expressed                                             | Chr1  | 42695091 | 42699059 - | 6  | 2771 | 7.78 |
| LOC_Os03g44150.1 | aminotransferase, putative, expressed                                              | Chr3  | 24810051 | 24818067 - | 10 | 2202 | 7.79 |
| LOC_Os01g07740.1 | DEAD-box ATP-dependent RNA helicase 14, putative, expressed                        | Chr1  | 3713687  | 3718637 -  | 14 | 3370 | 7.79 |
| LOC_Os01g07740.2 | DEAD-box ATP-dependent RNA helicase 14, putative, expressed                        | Chr1  | 3713702  | 3718631 -  | 14 | 3346 | 7.79 |
| LOC_Os11g29700.2 | expressed protein                                                                  | Chr11 | 17210644 | 17212826 - | 7  | 1021 | 7.79 |
| LOC_Os11g29700.1 | expressed protein                                                                  | Chr11 | 17210644 | 17212826 - | 8  | 1104 | 7.79 |
| LOC_Os12g39520.1 | OsFBDUF66 - F-box and DUF domain containing protein, expressed                     | Chr12 | 24359079 | 24360593 - | 1  | 1547 | 7.80 |
| LOC_Os01g13370.1 | seven in absentia protein family domain containing protein, expressed              | Chr1  | 7450837  | 7453683 -  | 3  | 1879 | 7.80 |
| LOC_Os01g72820.2 | CRS1/YhbY domain containing protein, putative, expressed                           | Chr1  | 42240837 | 42245248 + | 7  | 2779 | 7.80 |
| LOC_Os01g62440.2 | ribonuclease protein, putative, expressed                                          | Chr1  | 36141662 | 36146302 - | 12 | 2389 | 7.81 |
| LOC_Os03g50500.1 | PPR repeat domain containing protein, putative, expressed                          | Chr3  | 28830826 | 28836835 + | 4  | 3314 | 7.82 |
| LOC_Os03g50010.1 | toc64, putative, expressed                                                         | Chr3  | 28533089 | 28541241 - | 13 | 2694 | 7.82 |
| LOC_Os06g49980.1 | expressed protein                                                                  | Chr6  | 30269919 | 30272801 - | 5  | 1276 | 7.82 |
| LOC_Os05g01450.2 | eukaryotic translation initiation factor 3 subunit F, putative, expressed          | Chr5  | 259953   | 262291 -   | 5  | 1353 | 7.82 |
| LOC_Os01g46590.2 | expressed protein                                                                  | Chr1  | 26522715 | 26527305 - | 8  | 2471 | 7.83 |
| LOC_Os01g47550.1 | kinase, pfkB family, putative, expressed                                           | Chr1  | 27185633 | 27191256 + | 5  | 1674 | 7.83 |
| LOC_Os01g07910.1 | NADH-cytochrome b5 reductase, putative, expressed                                  | Chr1  | 3820168  | 3824523 -  | 13 | 1837 | 7.83 |
| LOC_Os01g62790.2 | expressed protein                                                                  | Chr1  | 36359709 | 36365444 + | 8  | 2299 | 7.83 |
| LOC_Os04g20180.1 | expressed protein                                                                  | Chr4  | 11247240 | 11254759 + | 7  | 3114 | 7.83 |
| LOC_Os01g62790.1 | expressed protein                                                                  | Chr1  | 36359709 | 36365493 + | 8  | 2402 | 7.83 |
| LOC_Os07g38930.1 | glucan endo-1,3-beta-glucosidase precursor, putative, expressed                    | Chr7  | 23344089 | 23348726 + | 5  | 2593 | 7.85 |
| LOC_Os02g32660.1 | 1,4-alpha-glucan-branching enzyme, chloroplast precursor, putative, expressed      | Chr2  | 19355748 | 19367127 - | 22 | 3662 | 7.85 |
| LOC_Os03g18200.1 | heat shock protein DnaJ, putative, expressed                                       | Chr3  | 10204819 | 10210306 + | 9  | 3308 | 7.85 |
| LOC_Os07g08340.2 | pyruvate kinase, putative, expressed                                               | Chr7  | 4266880  | 4271484 +  | 8  | 2097 | 7.86 |
| LOC_Os10g35280.1 | nucleolar complex protein 2, putative, expressed                                   | Chr10 | 18852112 | 18857346 - | 12 | 3050 | 7.86 |
| LOC_Os07g08340.1 | pyruvate kinase, putative, expressed                                               | Chr7  | 4266882  | 4271518 +  | 6  | 2335 | 7.86 |
| LOC_Os01g59500.1 | U3 small nucleolar RNA-associated protein 11, putative, expressed                  | Chr1  | 34409226 | 34412582 - | 9  | 1830 | 7.86 |
| LOC_Os01g59500.2 | U3 small nucleolar RNA-associated protein 11, putative, expressed                  | Chr1  | 34409226 | 34412582 - | 9  | 1835 | 7.86 |
| LOC_Os05g01450.1 | eukaryotic translation initiation factor 3 subunit F, putative, expressed          | Chr5  | 259953   | 262291 -   | 6  | 1465 | 7.86 |
| LOC_Os01g72820.1 | CRS1/YhbY domain containing protein, putative, expressed                           | Chr1  | 42240786 | 42245248 + | 6  | 3041 | 7.86 |
| LOC_Os09g11250.1 | co-chaperone GrpE protein, putative, expressed                                     | Chr9  | 6246237  | 6249750 -  | 6  | 1476 | 7.87 |
| LOC_Os08g25090.2 | co-chaperone GrpE protein, putative, expressed                                     | Chr8  | 15232850 | 15236364 - | 6  | 1696 | 7.87 |
| LOC_Os08g25090.1 | co-chaperone GrpE protein, putative, expressed                                     | Chr8  | 15232850 | 15236364 - | 5  | 1736 | 7.87 |
| LOC_Os02g36360.1 | ZOS2-11 - C2H2 zinc finger protein, expressed                                      | Chr2  | 21956588 | 21960123 - | 2  | 1833 | 7.88 |
| LOC_Os04g31190.1 | dynamamin family protein, putative, expressed                                      | Chr4  | 18659440 | 18669921 - | 20 | 3460 | 7.89 |
| LOC_Os03g29180.1 | ubiquinone biosynthesis protein COQ9, mitochondrial precursor, putative, expressed | Chr3  | 16580151 | 16586153 + | 6  | 1595 | 7.89 |
| LOC_Os05g03060.1 | expressed protein                                                                  | Chr5  | 1195078  | 1199241 +  | 8  | 2514 | 7.89 |
| LOC_Os04g54410.1 | expressed protein                                                                  | Chr4  | 32370810 | 32378071 - | 13 | 2333 | 7.89 |

|                  |                                                                                |       |          |            |    |      |      |
|------------------|--------------------------------------------------------------------------------|-------|----------|------------|----|------|------|
| LOC_Os02g03330.1 | expressed protein                                                              | Chr2  | 1344644  | 1347027 +  | 3  | 1229 | 7.90 |
| LOC_Os02g36360.2 | ZOS2-11 - C2H2 zinc finger protein, expressed                                  | Chr2  | 21956589 | 21960123 - | 3  | 1936 | 7.90 |
| LOC_Os02g36360.3 | ZOS2-11 - C2H2 zinc finger protein, expressed                                  | Chr2  | 21956589 | 21960123 - | 3  | 1943 | 7.90 |
| LOC_Os07g37640.1 | IKI3 family protein, expressed                                                 | Chr7  | 22565757 | 22571603 + | 6  | 4880 | 7.90 |
| LOC_Os03g22430.1 | OsClp5 - Putative Clp protease homologue, expressed                            | Chr3  | 12854119 | 12859369 - | 10 | 2008 | 7.91 |
| LOC_Os09g37720.1 | RNA recognition motif containing protein, expressed                            | Chr9  | 21742603 | 21743594 - | 1  | 1024 | 7.92 |
| LOC_Os03g15590.1 | eukaryotic translation initiation factor, putative, expressed                  | Chr3  | 8597328  | 8600511 -  | 6  | 876  | 7.92 |
| LOC_Os01g01670.1 | expressed protein                                                              | Chr1  | 331355   | 332345 -   | 1  | 1023 | 7.92 |
| LOC_Os03g12020.1 | 50S ribosomal protein L15, chloroplast precursor, putative, expressed          | Chr3  | 6295472  | 6297624 +  | 3  | 1097 | 7.92 |
| LOC_Os07g36190.1 | hydrolase, NUDIX family, domain containing protein, expressed                  | Chr7  | 21625619 | 21628826 + | 6  | 1340 | 7.93 |
| LOC_Os03g53170.1 | pentatricopeptide, putative, expressed                                         | Chr3  | 30502405 | 30507088 + | 4  | 3169 | 7.94 |
| LOC_Os12g06290.1 | expressed protein                                                              | Chr12 | 3007570  | 3009854 -  | 4  | 1290 | 7.94 |
| LOC_Os01g67750.1 | expressed protein                                                              | Chr1  | 39374936 | 39379568 - | 8  | 3091 | 7.94 |
| LOC_Os01g46590.1 | expressed protein                                                              | Chr1  | 26522742 | 26527305 - | 7  | 2559 | 7.94 |
| LOC_Os03g25130.2 | OB-fold nucleic acid binding domain containing protein, putative, expressed    | Chr3  | 14357771 | 14359171 - | 3  | 1054 | 7.94 |
| LOC_Os06g12460.1 | CSLA3 - cellulose synthase-like family A%3B mannan synthase, expressed         | Chr6  | 6758181  | 6762995 +  | 12 | 2220 | 7.95 |
| LOC_Os06g04360.1 | expressed protein                                                              | Chr6  | 1856820  | 1861053 -  | 7  | 2325 | 7.95 |
| LOC_Os01g72820.6 | CRS1/YhbY domain containing protein, putative, expressed                       | Chr1  | 42240786 | 42245248 + | 5  | 2961 | 7.95 |
| LOC_Os06g43900.1 | ribosomal protein L35, putative, expressed                                     | Chr6  | 26442595 | 26444898 + | 3  | 1041 | 7.95 |
| LOC_Os03g18200.2 | heat shock protein DnaJ, putative, expressed                                   | Chr3  | 10205250 | 10208503 + | 6  | 2156 | 7.96 |
| LOC_Os06g49180.1 | plant-specific domain TIGR01589 family protein, putative, expressed            | Chr6  | 29798150 | 29801547 - | 7  | 2034 | 7.97 |
| LOC_Os07g44730.1 | expressed protein                                                              | Chr7  | 26700793 | 26705243 - | 8  | 1822 | 7.98 |
| LOC_Os02g24270.1 | retrotransposon protein, putative, unclassified, expressed                     | Chr2  | 14073567 | 14076360 + | 3  | 2639 | 7.98 |
| LOC_Os02g47744.2 | MYB family transcription factor, putative, expressed                           | Chr2  | 29190864 | 29195573 + | 3  | 3368 | 7.99 |
| LOC_Os08g37140.1 | phosphoglycerate mutase, putative, expressed                                   | Chr8  | 23468743 | 23472607 - | 6  | 1416 | 7.99 |
| LOC_Os05g06510.2 | 4Fe-4S binding domain containing protein, expressed                            | Chr5  | 3348811  | 3352850 -  | 12 | 2134 | 7.99 |
| LOC_Os05g06510.1 | 4Fe-4S binding domain containing protein, expressed                            | Chr5  | 3348811  | 3352850 -  | 12 | 2140 | 7.99 |
| LOC_Os01g47080.1 | pyruvate kinase, putative, expressed                                           | Chr1  | 26888393 | 26895732 - | 12 | 2630 | 8.00 |
| LOC_Os02g50820.1 | nucleobase-ascorbate transporter, putative, expressed                          | Chr2  | 31046036 | 31051816 - | 14 | 2926 | 8.00 |
| LOC_Os09g34847.1 | expressed protein                                                              | Chr9  | 20305822 | 20308339 + | 2  | 2454 | 8.01 |
| LOC_Os08g14220.1 | expressed protein                                                              | Chr8  | 8497671  | 8500099 -  | 5  | 1166 | 8.02 |
| LOC_Os03g27960.1 | sodium/calcium exchanger protein, putative, expressed                          | Chr3  | 16061184 | 16065169 + | 11 | 2432 | 8.02 |
| LOC_Os03g27960.2 | sodium/calcium exchanger protein, putative, expressed                          | Chr3  | 16061151 | 16065169 + | 11 | 2462 | 8.02 |
| LOC_Os04g49150.1 | OsMADS17 - MADS-box family gene with MIKcC type-box, expressed                 | Chr4  | 29308245 | 29314112 + | 8  | 1381 | 8.03 |
| LOC_Os03g44840.2 | choline transporter-related, putative, expressed                               | Chr3  | 25298624 | 25301880 - | 2  | 1601 | 8.04 |
| LOC_Os01g72820.4 | CRS1/YhbY domain containing protein, putative, expressed                       | Chr1  | 42240786 | 42245248 + | 5  | 3113 | 8.05 |
| LOC_Os04g50720.1 | ara54-like RING finger protein, putative, expressed                            | Chr4  | 30006879 | 30011384 + | 7  | 2476 | 8.06 |
| LOC_Os01g16290.1 | DNA gyrase subunit B, chloroplast/mitochondrial precursor, putative, expressed | Chr1  | 9225213  | 9237059 +  | 21 | 3482 | 8.07 |
| LOC_Os01g13530.1 | ABIL2, putative, expressed                                                     | Chr1  | 7557172  | 7560626 +  | 9  | 2026 | 8.07 |
| LOC_Os03g52750.2 | cyclin, putative, expressed                                                    | Chr3  | 30235883 | 30241190 + | 15 | 2385 | 8.07 |
| LOC_Os03g44840.1 | choline transporter-related, putative, expressed                               | Chr3  | 25297660 | 25301880 - | 3  | 2035 | 8.08 |
| LOC_Os03g52750.1 | cyclin, putative, expressed                                                    | Chr3  | 30235883 | 30241190 + | 15 | 2421 | 8.09 |
| LOC_Os10g41150.1 | aminotransferase, classes I and II, domain containing protein, expressed       | Chr10 | 22105370 | 22109134 + | 11 | 2164 | 8.09 |
| LOC_Os01g73900.1 | DEAD-box ATP-dependent RNA helicase, putative, expressed                       | Chr1  | 42821164 | 42825125 - | 10 | 2197 | 8.10 |
| LOC_Os04g23910.1 | OsMADS25 - MADS-box family gene with MIKcC type-box, expressed                 | Chr4  | 13672710 | 13675884 + | 8  | 1358 | 8.11 |

|                  |                                                                                                   |       |          |          |   |    |      |      |
|------------------|---------------------------------------------------------------------------------------------------|-------|----------|----------|---|----|------|------|
| LOC_Os09g29840.1 | heat shock protein, putative, expressed                                                           | Chr9  | 18150618 | 18155512 | - | 19 | 3520 | 8.11 |
| LOC_Os09g29840.2 | heat shock protein, putative, expressed                                                           | Chr9  | 18150618 | 18155512 | - | 18 | 3580 | 8.11 |
| LOC_Os05g46950.1 | expressed protein                                                                                 | Chr5  | 27163273 | 27166835 | - | 6  | 1324 | 8.14 |
| LOC_Os09g39390.1 | oxidoreductase, aldo/keto reductase family protein, putative, expressed                           | Chr9  | 22649087 | 22652085 | + | 9  | 1776 | 8.14 |
| LOC_Os01g12910.1 | thioesterase family protein, putative, expressed                                                  | Chr1  | 7173618  | 7175813  | + | 3  | 891  | 8.14 |
| LOC_Os12g41956.1 | galactosyltransferase family protein, putative, expressed                                         | Chr12 | 26016668 | 26020765 | + | 7  | 2786 | 8.15 |
| LOC_Os07g48640.1 | short-chain dehydrogenase/reductase, putative, expressed                                          | Chr7  | 29121890 | 29124961 | + | 6  | 1524 | 8.15 |
| LOC_Os06g06380.1 | NBS-LRR type disease resistance protein, putative, expressed                                      | Chr6  | 2973521  | 2979496  | - | 4  | 4139 | 8.15 |
| LOC_Os03g21250.1 | glycosyl transferase, family 8, putative, expressed                                               | Chr3  | 12133469 | 12138706 | - | 9  | 3112 | 8.15 |
| LOC_Os07g48640.2 | short-chain dehydrogenase/reductase, putative, expressed                                          | Chr7  | 29121756 | 29124961 | + | 7  | 1598 | 8.15 |
| LOC_Os01g42780.1 | cysteine proteinase EP-B 2 precursor, putative, expressed                                         | Chr1  | 24343518 | 24345173 | - | 2  | 1467 | 8.15 |
| LOC_Os05g39230.2 | low photochemical bleaching 1 protein, putative, expressed                                        | Chr5  | 22996896 | 23005544 | + | 16 | 3418 | 8.16 |
| LOC_Os03g46600.1 | acidic leucine-rich nuclear phosphoprotein 32-related protein 2, putative, expressed              | Chr3  | 26377651 | 26379868 | + | 2  | 1226 | 8.16 |
| LOC_Os08g09230.2 | starch synthase III, putative, expressed                                                          | Chr8  | 5352105  | 5363367  | + | 16 | 6276 | 8.16 |
| LOC_Os08g09230.1 | starch synthase III, putative, expressed                                                          | Chr8  | 5352105  | 5363367  | + | 16 | 6278 | 8.16 |
| LOC_Os05g39230.1 | low photochemical bleaching 1 protein, putative, expressed                                        | Chr5  | 22996896 | 23005544 | + | 17 | 3528 | 8.18 |
| LOC_Os09g32010.1 | ternary complex factor MIP1, putative, expressed                                                  | Chr9  | 19103942 | 19108920 | + | 12 | 3163 | 8.20 |
| LOC_Os09g32010.2 | ternary complex factor MIP1, putative, expressed                                                  | Chr9  | 19103942 | 19108920 | + | 11 | 3379 | 8.20 |
| LOC_Os04g51390.1 | aldose 1-epimerase, putative, expressed                                                           | Chr4  | 30433199 | 30438364 | + | 9  | 1840 | 8.21 |
| LOC_Os05g05810.2 | DEAD-box ATP-dependent RNA helicase, putative, expressed                                          | Chr5  | 2906228  | 2913774  | - | 14 | 3616 | 8.22 |
| LOC_Os02g57240.1 | oxidoreductase, aldo/keto reductase family protein, putative, expressed                           | Chr2  | 35067976 | 35072613 | + | 4  | 1493 | 8.22 |
| LOC_Os05g05810.1 | DEAD-box ATP-dependent RNA helicase, putative, expressed                                          | Chr5  | 2906228  | 2913780  | - | 16 | 3664 | 8.23 |
| LOC_Os06g51270.1 | 1,3-beta-glucan synthase component domain containing protein, expressed                           | Chr6  | 31033381 | 31048512 | - | 42 | 7290 | 8.23 |
| LOC_Os04g33460.1 | 1,4-alpha-glucan-branching enzyme 2, chloroplast precursor, putative, expressed                   | Chr4  | 20239790 | 20243460 | - | 10 | 1586 | 8.23 |
| LOC_Os04g51390.2 | aldose 1-epimerase, putative, expressed                                                           | Chr4  | 30433199 | 30438328 | + | 8  | 2219 | 8.24 |
| LOC_Os01g39270.1 | NAD binding domain of 6-phosphogluconate dehydrogenase containing protein, expressed              | Chr1  | 22088204 | 22091020 | - | 11 | 1608 | 8.26 |
| LOC_Os03g60120.1 | AP2 domain containing protein, expressed                                                          | Chr3  | 34192417 | 34193650 | - | 1  | 1266 | 8.27 |
| LOC_Os04g33040.1 | alpha-amylase precursor, putative, expressed                                                      | Chr4  | 20006128 | 20009276 | + | 12 | 1623 | 8.27 |
| LOC_Os03g55280.1 | semialdehyde dehydrogenase, NAD binding domain containing protein, putative, expressed            | Chr3  | 31460384 | 31463608 | + | 8  | 1729 | 8.28 |
| LOC_Os12g34860.1 | phenylalanyl-tRNA synthetase, putative, expressed                                                 | Chr12 | 21220797 | 21226234 | + | 10 | 2435 | 8.30 |
| LOC_Os12g38440.3 | XH domain containing protein, expressed                                                           | Chr12 | 23596109 | 23600231 | + | 9  | 1825 | 8.32 |
| LOC_Os12g38440.2 | XH domain containing protein, expressed                                                           | Chr12 | 23596174 | 23600231 | + | 9  | 1884 | 8.33 |
| LOC_Os03g61019.1 | mitochondrial import inner membrane translocase subunit Tim, putative, expressed                  | Chr3  | 34668985 | 34671141 | - | 6  | 828  | 8.34 |
| LOC_Os12g38440.1 | XH domain containing protein, expressed                                                           | Chr12 | 23596174 | 23600217 | + | 10 | 1941 | 8.34 |
| LOC_Os11g11370.1 | expressed protein                                                                                 | Chr11 | 6308501  | 6310797  | + | 2  | 1001 | 8.34 |
| LOC_Os03g39010.1 | possible lysine decarboxylase domain containing protein, expressed                                | Chr3  | 21685293 | 21687796 | + | 4  | 2215 | 8.35 |
| LOC_Os08g25734.2 | glucose-1-phosphate adenylyltransferase large subunit, chloroplast precursor, putative, expressed | Chr8  | 15666201 | 15672594 | - | 10 | 2264 | 8.35 |
| LOC_Os08g25734.1 | glucose-1-phosphate adenylyltransferase large subunit, chloroplast precursor, putative, expressed | Chr8  | 15666201 | 15671051 | - | 10 | 2383 | 8.35 |
| LOC_Os01g27990.1 | NPL4, putative, expressed                                                                         | Chr1  | 15644812 | 15649520 | + | 2  | 1828 | 8.36 |
| LOC_Os01g42980.4 | ribosomal protein L22, putative, expressed                                                        | Chr1  | 24480855 | 24483664 | + | 8  | 1262 | 8.40 |
| LOC_Os12g35270.1 | expressed protein                                                                                 | Chr12 | 21429634 | 21431701 | - | 3  | 1024 | 8.41 |
| LOC_Os03g25130.1 | OB-fold nucleic acid binding domain containing protein, putative, expressed                       | Chr3  | 14357987 | 14359171 | - | 2  | 1119 | 8.41 |
| LOC_Os09g32210.1 | pumilio-family RNA binding repeat containing protein, expressed                                   | Chr9  | 19220516 | 19227564 | - | 10 | 3909 | 8.42 |
| LOC_Os03g41612.1 | ribosomal protein L25, putative, expressed                                                        | Chr3  | 23135473 | 23140230 | - | 3  | 1137 | 8.43 |
| LOC_Os03g41612.2 | ribosomal protein L25, putative, expressed                                                        | Chr3  | 23135473 | 23140230 | - | 3  | 1123 | 8.43 |

|                  |                                                                                           |       |          |            |    |      |      |
|------------------|-------------------------------------------------------------------------------------------|-------|----------|------------|----|------|------|
| LOC_Os11g11256.1 | expressed protein                                                                         | Chr11 | 6228270  | 6230973 +  | 2  | 1852 | 8.45 |
| LOC_Os03g60720.1 | expansin precursor, putative, expressed                                                   | Chr3  | 34508262 | 34511279 - | 2  | 1716 | 8.46 |
| LOC_Os02g15820.2 | extra-large G-protein-related, putative, expressed                                        | Chr2  | 8938128  | 8943557 -  | 4  | 3289 | 8.49 |
| LOC_Os02g15820.1 | extra-large G-protein-related, putative, expressed                                        | Chr2  | 8938128  | 8943651 -  | 5  | 3297 | 8.49 |
| LOC_Os05g36000.1 | FabA-like domain containing protein, expressed                                            | Chr5  | 21322822 | 21325176 + | 4  | 1130 | 8.49 |
| LOC_Os01g03570.1 | transcription factor X1, putative, expressed                                              | Chr1  | 1446849  | 1450473 +  | 7  | 2502 | 8.51 |
| LOC_Os06g51520.4 | lysine ketoglutarate reductase trans-splicing related 1, putative, expressed              | Chr6  | 31212403 | 31217514 + | 12 | 2022 | 8.51 |
| LOC_Os06g51520.2 | lysine ketoglutarate reductase trans-splicing related 1, putative, expressed              | Chr6  | 31212403 | 31217599 + | 12 | 2064 | 8.51 |
| LOC_Os06g51520.1 | lysine ketoglutarate reductase trans-splicing related 1, putative, expressed              | Chr6  | 31212403 | 31217599 + | 12 | 2067 | 8.51 |
| LOC_Os06g51520.5 | lysine ketoglutarate reductase trans-splicing related 1, putative, expressed              | Chr6  | 31212403 | 31217599 + | 11 | 2176 | 8.51 |
| LOC_Os12g12740.1 | leucine-rich repeat family protein, putative, expressed                                   | Chr12 | 7017321  | 7022666 -  | 15 | 2997 | 8.55 |
| LOC_Os02g02360.1 | expressed protein                                                                         | Chr2  | 785941   | 789235 +   | 5  | 2217 | 8.57 |
| LOC_Os03g16470.2 | expressed protein                                                                         | Chr3  | 9079602  | 9081544 +  | 3  | 1172 | 8.57 |
| LOC_Os01g43250.1 | WD domain, G-beta repeat domain containing protein, expressed                             | Chr1  | 24703771 | 24708911 - | 8  | 1515 | 8.64 |
| LOC_Os07g44710.1 | CAMK_CAMK_like.36 - CAMK includes calcium/calmodulin depedent protein kinases, expressed  | Chr7  | 26683038 | 26688827 - | 11 | 3170 | 8.65 |
| LOC_Os04g46570.3 | growth regulator related protein, putative, expressed                                     | Chr4  | 27608423 | 27609940 - | 1  | 1550 | 8.68 |
| LOC_Os04g46190.2 | ubiquitin carboxyl-terminal hydrolase, family 1, putative, expressed                      | Chr4  | 27358305 | 27361232 + | 8  | 1119 | 8.69 |
| LOC_Os04g46190.1 | ubiquitin carboxyl-terminal hydrolase, family 1, putative, expressed                      | Chr4  | 27358198 | 27361232 + | 9  | 1154 | 8.70 |
| LOC_Os03g02260.1 | DnaK family protein, putative, expressed                                                  | Chr3  | 766648   | 771264 -   | 6  | 2795 | 8.70 |
| LOC_Os01g32130.1 | expressed protein                                                                         | Chr1  | 17583645 | 17586310 + | 5  | 1438 | 8.72 |
| LOC_Os01g39830.1 | beta-galactosidase, putative, expressed                                                   | Chr1  | 22466546 | 22472589 + | 19 | 3865 | 8.75 |
| LOC_Os03g16010.1 | BRASSINOSTEROID INSENSITIVE 1-associated receptor kinase 1 precursor, putative, expressed | Chr3  | 8827645  | 8833588 +  | 14 | 3071 | 8.76 |
| LOC_Os10g27990.1 | exocyst complex component 6, putative, expressed                                          | Chr10 | 14500800 | 14504243 - | 2  | 3092 | 8.76 |
| LOC_Os01g64720.1 | expressed protein                                                                         | Chr1  | 37551977 | 37556502 + | 13 | 1896 | 8.77 |
| LOC_Os01g64720.2 | expressed protein                                                                         | Chr1  | 37551990 | 37556502 + | 12 | 1948 | 8.77 |
| LOC_Os02g54730.1 | transmembrane amino acid transporter protein, putative, expressed                         | Chr2  | 33511971 | 33517881 - | 12 | 2565 | 8.78 |
| LOC_Os08g06010.1 | transporter, major facilitator family, putative, expressed                                | Chr8  | 3281097  | 3284500 +  | 3  | 2412 | 8.78 |
| LOC_Os09g34090.2 | sterol-4-alpha-carboxylate 3-dehydrogenase, decarboxylating, putative, expressed          | Chr9  | 20117440 | 20121733 - | 10 | 2405 | 8.78 |
| LOC_Os09g34090.1 | sterol-4-alpha-carboxylate 3-dehydrogenase, decarboxylating, putative, expressed          | Chr9  | 20117440 | 20121733 - | 11 | 2504 | 8.79 |
| LOC_Os04g46570.1 | growth regulator related protein, putative, expressed                                     | Chr4  | 27608430 | 27612504 - | 9  | 2507 | 8.82 |
| LOC_Os04g46570.2 | growth regulator related protein, putative, expressed                                     | Chr4  | 27608425 | 27612504 - | 8  | 2717 | 8.85 |
| LOC_Os12g38140.1 | expressed protein                                                                         | Chr12 | 23420042 | 23420870 + | 1  | 861  | 8.87 |
| LOC_Os01g39790.1 | esterase/lipase/thioesterase, putative, expressed                                         | Chr1  | 22439033 | 22442003 - | 8  | 1493 | 8.92 |
| LOC_Os12g10784.2 | 2-dehydro-3-deoxyphosphooctonate aldolase, putative, expressed                            | Chr12 | 5801422  | 5807238 +  | 14 | 1701 | 8.93 |
| LOC_Os12g10784.3 | 2-dehydro-3-deoxyphosphooctonate aldolase, putative, expressed                            | Chr12 | 5801422  | 5807238 +  | 14 | 1715 | 8.93 |
| LOC_Os12g10784.1 | 2-dehydro-3-deoxyphosphooctonate aldolase, putative, expressed                            | Chr12 | 5801448  | 5807238 +  | 13 | 1758 | 8.94 |
| LOC_Os02g09060.1 | BRCA1-associated protein, putative, expressed                                             | Chr2  | 4630330  | 4634623 -  | 12 | 2162 | 8.94 |
| LOC_Os01g39790.2 | esterase/lipase/thioesterase, putative, expressed                                         | Chr1  | 22439033 | 22441966 - | 8  | 1675 | 8.95 |
| LOC_Os02g09060.2 | BRCA1-associated protein, putative, expressed                                             | Chr2  | 4630330  | 4634623 -  | 10 | 2482 | 8.95 |
| LOC_Os05g34780.1 | retrotransposon protein, putative, Ty3-gypsy subclass, expressed                          | Chr5  | 20636382 | 20643355 + | 5  | 2221 | 9.07 |
| LOC_Os01g42980.1 | ribosomal protein L22, putative, expressed                                                | Chr1  | 24480855 | 24483757 + | 7  | 1559 | 9.13 |
| LOC_Os05g02530.1 | glutathione S-transferase, N-terminal domain containing protein, expressed                | Chr5  | 876950   | 880628 -   | 6  | 1577 | 9.13 |
| LOC_Os01g42980.2 | ribosomal protein L22, putative, expressed                                                | Chr1  | 24480855 | 24483757 + | 6  | 1632 | 9.14 |
| LOC_Os03g16470.1 | expressed protein                                                                         | Chr3  | 9079602  | 9080939 +  | 3  | 891  | 9.14 |
| LOC_Os06g04340.1 | expressed protein                                                                         | Chr6  | 1844953  | 1848753 -  | 7  | 2008 | 9.15 |

|                  |                                                                                                   |       |          |            |    |      |       |
|------------------|---------------------------------------------------------------------------------------------------|-------|----------|------------|----|------|-------|
| LOC_Os03g16470.3 | expressed protein                                                                                 | Chr3  | 9079602  | 9080940 +  | 3  | 920  | 9.19  |
| LOC_Os04g42420.3 | nodulin, putative, expressed                                                                      | Chr4  | 25104771 | 25107672 + | 2  | 2590 | 9.20  |
| LOC_Os02g07800.1 | transcription factor, putative, expressed                                                         | Chr2  | 4083023  | 4086047 +  | 5  | 1468 | 9.21  |
| LOC_Os05g46290.1 | T-complex protein, putative, expressed                                                            | Chr5  | 26835671 | 26840314 - | 17 | 2693 | 9.31  |
| LOC_Os05g50990.1 | TTL3, putative, expressed                                                                         | Chr5  | 29257803 | 29262204 - | 6  | 3430 | 9.35  |
| LOC_Os02g14110.1 | aminotransferase, classes I and II, domain containing protein, expressed                          | Chr2  | 7706619  | 7711598 +  | 10 | 2779 | 9.38  |
| LOC_Os08g40610.1 | 30S ribosomal protein S16, putative, expressed                                                    | Chr8  | 25702617 | 25704363 - | 3  | 864  | 9.45  |
| LOC_Os04g44290.1 | expressed protein                                                                                 | Chr4  | 26232855 | 26237506 + | 8  | 2988 | 9.51  |
| LOC_Os01g09890.1 | translation initiation factor SU11, putative, expressed                                           | Chr1  | 5138463  | 5140925 -  | 6  | 1294 | 9.51  |
| LOC_Os06g45710.1 | phosphoglycerate kinase protein, putative, expressed                                              | Chr6  | 27676318 | 27679785 - | 7  | 2020 | 9.54  |
| LOC_Os05g01270.1 | peptidyl-prolyl cis-trans isomerase, putative, expressed                                          | Chr5  | 185622   | 188487 +   | 7  | 1384 | 9.55  |
| LOC_Os05g50380.2 | glucose-1-phosphate adenylyltransferase large subunit, chloroplast precursor, putative, expressed | Chr5  | 28871794 | 28876879 - | 16 | 2522 | 9.59  |
| LOC_Os05g50380.1 | glucose-1-phosphate adenylyltransferase large subunit, chloroplast precursor, putative, expressed | Chr5  | 28871794 | 28877277 - | 16 | 2823 | 9.62  |
| LOC_Os03g14530.1 | S10/S20 domain containing ribosomal protein, putative, expressed                                  | Chr3  | 7884815  | 7886832 +  | 3  | 849  | 9.65  |
| LOC_Os04g43160.1 | expressed protein                                                                                 | Chr4  | 25548378 | 25550603 - | 3  | 2046 | 9.83  |
| LOC_Os08g36860.1 | cytochrome P450, putative, expressed                                                              | Chr8  | 23288613 | 23294164 - | 9  | 2487 | 9.97  |
| LOC_Os10g25780.3 | FAD-linked oxidoreductase protein, putative, expressed                                            | Chr10 | 13359545 | 13361910 - | 2  | 2176 | 10.98 |
| LOC_Os10g25780.2 | FAD-linked oxidoreductase protein, putative, expressed                                            | Chr10 | 13359545 | 13363225 - | 3  | 2483 | 10.98 |
| LOC_Os10g25780.1 | FAD-linked oxidoreductase protein, putative, expressed                                            | Chr10 | 13359545 | 13362322 - | 3  | 2435 | 11.00 |

**Table S3. qRT-PCR validation of differential expression patterns (Log2FC) in 7 dpi giant cell tissue versus control cells from the vascular root tissue.**

| <b>Locusnumber</b> | <b>Annotation</b>                                                         | <b>mRNASeq</b> | <b>qRT-PCR</b> |
|--------------------|---------------------------------------------------------------------------|----------------|----------------|
| LOC_Os06g29950     | MATE domain containing protein                                            | -6,51          | -3,66          |
| LOC_Os12g08760     | carboxyvinyl-carboxyphosphonate phosphorylmutase                          | -6,06          | -1,38          |
| LOC_Os11g32650     | chalcone synthase                                                         | -2,04          | -2,47          |
| LOC_Os08g09080     | Cupin domain containing protein                                           | -4,21          | -1,98          |
| LOC_Os01g55240     | gibberellin 2-beta-dioxygenase                                            | -7,13          | -1,74          |
| LOC_Os11g44960     | NBS-LRR disease resistance protein                                        | -4,50          | -4,57          |
| LOC_Os03g14990     | chorismate synthase 2, chloroplast precursor                              | -3,60          | -7,64          |
| LOC_Os09g28690     | gibberellin receptor GID1L2                                               | 4,91           | 1,66           |
| LOC_Os02g35180     | OsRR2 type-A response regulator                                           | 6,83           | 2,12           |
| LOC_Os01g51700     | ras-related protein Ras GTPase                                            | 1,92           | 6,45           |
| LOC_Os02g19440     | sirohdrochlorin ferrochelatase, Cobalamin (vitamin B12) biosynthesis CbiX | 1,99           | 4,04           |
| LOC_Os03g16010     | BRASSINOSTEROID INSENSITIVE 1-associated receptor kinase 1 precursor      | 3,27           | 5,87           |
| LOC_Os02g56880     | transcriptional corepressor LEUNIG                                        | 2,10           | -1,74          |

**Table S4.** List of transcripts that are significantly differentially expressed in 14 dai giant cells induced by *M. graminicola*. The list shows the chromosomal location and the log<sub>2</sub>FC between giant cells and control vascular cells of each transcript.

| Transcript_ID    | Description                                                                       | Chr   | Left     | Right    | Sense | ExonCount | TotalExon Length | log2FC (14daiGC_vs_control) |
|------------------|-----------------------------------------------------------------------------------|-------|----------|----------|-------|-----------|------------------|-----------------------------|
| LOC_Os10g02070.1 | peroxidase precursor, putative, expressed                                         | Chr10 | 677086   | 678882   | -     | 4         | 1413             | -7.88                       |
| LOC_Os12g36640.1 | universal stress protein domain containing protein, putative, expressed           | Chr12 | 22429351 | 22431800 | -     | 4         | 1075             | -7.02                       |
| LOC_Os12g36640.2 | universal stress protein domain containing protein, putative, expressed           | Chr12 | 22429351 | 22431795 | -     | 4         | 1061             | -7.02                       |
| LOC_Os12g13674.1 | expressed protein                                                                 | Chr12 | 7709120  | 7711069  | +     | 1         | 1982             | -7.34                       |
| LOC_Os11g11960.1 | disease resistance protein RPM1, putative, expressed                              | Chr11 | 6638262  | 6640922  | -     | 1         | 2693             | -8.01                       |
| LOC_Os12g38140.1 | expressed protein                                                                 | Chr12 | 23420042 | 23420870 | +     | 1         | 861              | 9.29                        |
| LOC_Os12g26290.2 | alpha-DOX2, putative, expressed                                                   | Chr12 | 15330146 | 15340505 | -     | 12        | 2796             | -8.28                       |
| LOC_Os05g47700.1 | LTPL152 - Protease inhibitor/seed storage/LTP family protein precursor, expressed | Chr5  | 27330644 | 27331350 | +     | 1         | 739              | -7.06                       |
| LOC_Os09g27580.1 | potassium transporter, putative, expressed                                        | Chr9  | 16756249 | 16759734 | +     | 7         | 2761             | 6.26                        |
| LOC_Os05g41880.1 | mutS domain V family protein, expressed                                           | Chr5  | 24522895 | 24532290 | +     | 20        | 2513             | 5.96                        |
| LOC_Os04g11040.1 | expressed protein                                                                 | Chr4  | 5989515  | 5990234  | +     | 2         | 671              | -5.45                       |
| LOC_Os06g23370.1 | expressed protein                                                                 | Chr6  | 13635895 | 13640070 | -     | 4         | 3324             | 6.28                        |
| LOC_Os07g48170.1 | nucleotidyltransferase, putative, expressed                                       | Chr7  | 28770335 | 28776325 | -     | 11        | 3767             | 7.06                        |
| LOC_Os03g42010.2 | DNA-directed polymerase, putative, expressed                                      | Chr3  | 23334978 | 23340914 | +     | 14        | 2755             | 6.08                        |
| LOC_Os03g42010.1 | DNA-directed polymerase, putative, expressed                                      | Chr3  | 23334978 | 23340901 | +     | 14        | 2745             | 6.08                        |
| LOC_Os07g42310.1 | lung seven transmembrane domain containing protein, putative, expressed           | Chr7  | 25320455 | 25323506 | +     | 5         | 2182             | -9.01                       |
| LOC_Os01g21960.1 | serine/threonine-protein kinase, putative, expressed                              | Chr1  | 12326486 | 12331776 | +     | 8         | 2644             | -8.21                       |
| LOC_Os09g27580.3 | potassium transporter, putative, expressed                                        | Chr9  | 16755806 | 16759577 | +     | 8         | 2608             | 6.24                        |
| LOC_Os09g38970.1 | zinc finger family protein, putative, expressed                                   | Chr9  | 22376888 | 22382492 | +     | 9         | 3041             | 6.74                        |
| LOC_Os09g27580.2 | potassium transporter, putative, expressed                                        | Chr9  | 16754449 | 16759734 | +     | 8         | 3150             | 6.29                        |
| LOC_Os05g10670.1 | zinc finger CCCH type family protein, putative, expressed                         | Chr5  | 5846045  | 5848291  | -     | 1         | 2279             | 7.31                        |
| LOC_Os10g41980.1 | RALFL26 - Rapid Alkalinization Factor RALF family protein precursor, expressed    | Chr10 | 22575212 | 22576531 | +     | 2         | 695              | -7.76                       |
| LOC_Os03g12810.2 | maf, putative, expressed                                                          | Chr3  | 6871765  | 6875383  | -     | 7         | 2685             | 6.70                        |
| LOC_Os01g69220.1 | exostosin family domain containing protein, expressed                             | Chr1  | 40230199 | 40233220 | +     | 4         | 2097             | 6.71                        |
| LOC_Os11g44630.1 | calmodulin binding protein, putative, expressed                                   | Chr11 | 26983106 | 26985704 | -     | 5         | 1291             | -9.26                       |
| LOC_Os02g57720.1 | aquaporin protein, putative, expressed                                            | Chr2  | 35349673 | 35351454 | +     | 2         | 1613             | -10.23                      |
| LOC_Os02g58210.2 | jmjC domain containing protein, expressed                                         | Chr2  | 35624137 | 35630806 | +     | 16        | 3974             | 7.74                        |
| LOC_Os02g58210.1 | jmjC domain containing protein, expressed                                         | Chr2  | 35624137 | 35630806 | +     | 16        | 3977             | 7.74                        |
| LOC_Os12g26290.6 | alpha-DOX2, putative, expressed                                                   | Chr12 | 15330146 | 15340505 | -     | 12        | 2603             | -8.09                       |
| LOC_Os06g39480.1 | SPOC domain containing protein, putative, expressed                               | Chr6  | 23442839 | 23449453 | -     | 6         | 3812             | 6.78                        |
| LOC_Os11g12650.1 | PHD-finger domain containing protein, putative, expressed                         | Chr11 | 7125124  | 7128857  | -     | 5         | 2483             | 6.84                        |
| LOC_Os04g55700.1 | exonuclease, putative, expressed                                                  | Chr4  | 33149431 | 33153292 | -     | 12        | 2818             | 6.65                        |
| LOC_Os01g36560.1 | auxin-induced protein 5NG4, putative, expressed                                   | Chr1  | 20287702 | 20290661 | -     | 7         | 1443             | -6.86                       |
| LOC_Os12g26290.3 | alpha-DOX2, putative, expressed                                                   | Chr12 | 15330146 | 15340505 | -     | 11        | 2686             | -8.11                       |
| LOC_Os12g26290.5 | alpha-DOX2, putative, expressed                                                   | Chr12 | 15330146 | 15340505 | -     | 10        | 3153             | -8.11                       |
| LOC_Os12g26290.1 | alpha-DOX2, putative, expressed                                                   | Chr12 | 15330146 | 15340505 | -     | 11        | 2698             | -8.11                       |
| LOC_Os03g11110.1 | zinc finger family protein, putative, expressed                                   | Chr3  | 5710186  | 5715012  | -     | 9         | 2769             | 6.64                        |
| LOC_Os05g05440.1 | expressed protein                                                                 | Chr5  | 2703395  | 2711923  | -     | 13        | 4811             | 7.56                        |
| LOC_Os12g33289.1 | expressed protein                                                                 | Chr12 | 20134502 | 20137762 | -     | 2         | 2451             | 6.38                        |

|                  |                                                                                             |       |          |            |    |      |       |
|------------------|---------------------------------------------------------------------------------------------|-------|----------|------------|----|------|-------|
| LOC_Os06g46149.1 | serine/arginine repetitive matrix protein 1, putative, expressed                            | Chr6  | 27960874 | 27971323 + | 5  | 1510 | -7.71 |
| LOC_Os06g46149.2 | serine/arginine repetitive matrix protein 1, putative, expressed                            | Chr6  | 27960869 | 27971323 + | 5  | 1519 | -7.71 |
| LOC_Os01g62100.1 | retrotransposon protein, putative, unclassified, expressed                                  | Chr1  | 35940240 | 35949471 + | 22 | 6113 | 5.33  |
| LOC_Os03g59250.1 | expressed protein                                                                           | Chr3  | 33737454 | 33739501 - | 5  | 1615 | 6.69  |
| LOC_Os03g03930.1 | tRNA nucleotidyltransferase/polyA polymerase family protein, putative, expressed            | Chr3  | 1798696  | 1804326 -  | 14 | 2668 | 5.59  |
| LOC_Os12g04160.1 | ribosomal protein L24, putative, expressed                                                  | Chr12 | 1747185  | 1750059 -  | 5  | 1029 | 7.89  |
| LOC_Os09g38440.1 | ATXR, putative, expressed                                                                   | Chr9  | 22130437 | 22135245 + | 13 | 3456 | 7.24  |
| LOC_Os12g38440.1 | XH domain containing protein, expressed                                                     | Chr12 | 23596174 | 23600217 + | 10 | 1941 | 8.68  |
| LOC_Os12g38440.3 | XH domain containing protein, expressed                                                     | Chr12 | 23596109 | 23600231 + | 9  | 1825 | 8.67  |
| LOC_Os03g03930.2 | tRNA nucleotidyltransferase/polyA polymerase family protein, putative, expressed            | Chr3  | 1798698  | 1804163 -  | 13 | 2581 | 5.59  |
| LOC_Os04g04390.1 | retrotransposon protein, putative, unclassified, expressed                                  | Chr4  | 2071049  | 2084671 -  | 24 | 6162 | 5.47  |
| LOC_Os12g38440.2 | XH domain containing protein, expressed                                                     | Chr12 | 23596174 | 23600231 + | 9  | 1884 | 8.68  |
| LOC_Os12g34040.1 | retrotransposon protein, putative, unclassified, expressed                                  | Chr12 | 20546102 | 20547574 + | 1  | 1505 | 7.01  |
| LOC_Os06g45710.1 | phosphoglycerate kinase protein, putative, expressed                                        | Chr6  | 27676318 | 27679785 - | 7  | 2020 | 6.98  |
| LOC_Os03g39230.1 | OTU-like cysteine protease family protein, putative, expressed                              | Chr3  | 21784848 | 21791170 - | 17 | 3543 | 6.58  |
| LOC_Os11g45050.1 | NBS-LRR disease resistance protein, putative, expressed                                     | Chr11 | 27261093 | 27264194 + | 1  | 3134 | -5.93 |
| LOC_Os12g26290.4 | alpha-DOX2, putative, expressed                                                             | Chr12 | 15330146 | 15340505 - | 10 | 2574 | -8.05 |
| LOC_Os08g09270.1 | pentatricopeptide, putative, expressed                                                      | Chr8  | 5384443  | 5388851 +  | 7  | 2300 | 6.43  |
| LOC_Os06g51520.4 | lysine ketoglutarate reductase trans-splicing related 1, putative, expressed                | Chr6  | 31212403 | 31217514 + | 12 | 2022 | 6.40  |
| LOC_Os04g36062.1 | expressed protein                                                                           | Chr4  | 22017864 | 22024724 + | 12 | 2856 | 6.13  |
| LOC_Os04g36062.2 | expressed protein                                                                           | Chr4  | 22017861 | 22024724 + | 12 | 2842 | 6.13  |
| LOC_Os01g12400.2 | S-locus lectin protein kinase family protein, putative, expressed                           | Chr1  | 6774200  | 6777805 -  | 3  | 2788 | 6.79  |
| LOC_Os07g35560.2 | glucan endo-1,3-beta-glucosidase precursor, putative, expressed                             | Chr7  | 21280300 | 21282637 - | 4  | 2091 | -9.35 |
| LOC_Os06g51520.2 | lysine ketoglutarate reductase trans-splicing related 1, putative, expressed                | Chr6  | 31212403 | 31217599 + | 12 | 2064 | 6.40  |
| LOC_Os07g35560.3 | glucan endo-1,3-beta-glucosidase precursor, putative, expressed                             | Chr7  | 21280300 | 21282626 - | 4  | 2120 | -9.35 |
| LOC_Os06g51520.1 | lysine ketoglutarate reductase trans-splicing related 1, putative, expressed                | Chr6  | 31212403 | 31217599 + | 12 | 2067 | 6.40  |
| LOC_Os06g45860.1 | molybdenum cofactor sulfurase, putative, expressed                                          | Chr6  | 27749131 | 27756342 + | 22 | 3898 | 6.84  |
| LOC_Os03g16470.1 | expressed protein                                                                           | Chr3  | 9079602  | 9080939 +  | 3  | 891  | 6.90  |
| LOC_Os07g35560.1 | glucan endo-1,3-beta-glucosidase precursor, putative, expressed                             | Chr7  | 21280300 | 21282626 - | 3  | 2180 | -9.35 |
| LOC_Os09g39310.1 | expressed protein                                                                           | Chr9  | 22594487 | 22597481 - | 2  | 2427 | 7.02  |
| LOC_Os06g39110.1 | expressed protein                                                                           | Chr6  | 23227135 | 23228392 + | 2  | 908  | -7.41 |
| LOC_Os03g58570.1 | WD domain, G-beta repeat domain containing protein, expressed                               | Chr3  | 33346109 | 33349987 + | 8  | 3162 | 8.64  |
| LOC_Os06g51520.5 | lysine ketoglutarate reductase trans-splicing related 1, putative, expressed                | Chr6  | 31212403 | 31217599 + | 11 | 2176 | 6.40  |
| LOC_Os03g17600.1 | expressed protein                                                                           | Chr3  | 9788873  | 9791862 +  | 9  | 1220 | 6.15  |
| LOC_Os03g62170.1 | cyclase/dehydrase family protein, expressed                                                 | Chr3  | 35212863 | 35218270 + | 10 | 2887 | 4.88  |
| LOC_Os07g23169.1 | methyltransferase, putative, expressed                                                      | Chr7  | 13057792 | 13068285 - | 7  | 1722 | 7.29  |
| LOC_Os06g17390.1 | auxin-independent growth promoter protein, putative, expressed                              | Chr6  | 10082202 | 10087094 - | 8  | 3328 | 4.76  |
| LOC_Os10g26730.1 | exonuclease, putative, expressed                                                            | Chr10 | 13954485 | 13958089 + | 6  | 1894 | 6.32  |
| LOC_Os04g41570.2 | ethylene-responsive protein related, putative, expressed                                    | Chr4  | 24655105 | 24660068 - | 6  | 1443 | 6.81  |
| LOC_Os09g31486.2 | DnaK family protein, putative, expressed                                                    | Chr9  | 18987942 | 18991156 - | 4  | 2336 | 6.64  |
| LOC_Os04g41570.1 | ethylene-responsive protein related, putative, expressed                                    | Chr4  | 24655105 | 24660071 - | 6  | 1449 | 6.81  |
| LOC_Os03g09940.1 | sulfate transporter, putative, expressed                                                    | Chr3  | 4954101  | 4959448 -  | 12 | 3061 | 7.65  |
| LOC_Os05g50410.1 | Rad21 / Rec8 like protein, putative, expressed                                              | Chr5  | 28889622 | 28896919 + | 20 | 2776 | 7.85  |
| LOC_Os03g18590.1 | malonyl CoA-acyl carrier protein transacylase, mitochondrial precursor, putative, expressed | Chr3  | 10400748 | 10404295 - | 10 | 1915 | 6.29  |
| LOC_Os03g45260.1 | vesicle transport v-SNARE protein, putative, expressed                                      | Chr3  | 25552406 | 25556486 - | 4  | 1427 | 6.47  |



|                  |                                                                               |       |          |            |    |      |       |
|------------------|-------------------------------------------------------------------------------|-------|----------|------------|----|------|-------|
| LOC_Os02g39570.5 | ACT domain containing protein, expressed                                      | Chr2  | 23885607 | 23890260 + | 11 | 2250 | 5.93  |
| LOC_Os08g15030.1 | aspartate carbamoyltransferase, putative, expressed                           | Chr8  | 9071639  | 9075883 -  | 5  | 1591 | 6.94  |
| LOC_Os10g35210.1 | expressed protein                                                             | Chr10 | 18807789 | 18811992 + | 8  | 1910 | 6.28  |
| LOC_Os03g45220.1 | expressed protein                                                             | Chr3  | 25537496 | 25538099 + | 1  | 636  | 7.36  |
| LOC_Os03g05470.1 | tyrosine protein kinase domain containing protein, putative, expressed        | Chr3  | 2707463  | 2710821 +  | 6  | 1949 | -6.79 |
| LOC_Os09g29080.1 | expressed protein                                                             | Chr9  | 17659697 | 17662227 - | 5  | 1131 | 5.97  |
| LOC_Os09g31486.1 | DnaK family protein, putative, expressed                                      | Chr9  | 18987942 | 18991156 - | 5  | 2579 | 6.64  |
| LOC_Os03g16470.3 | expressed protein                                                             | Chr3  | 9079602  | 9080940 +  | 3  | 920  | 7.01  |
| LOC_Os06g04040.2 | WD domain, G-beta repeat domain containing protein, expressed                 | Chr6  | 1648617  | 1654300 +  | 13 | 2233 | 5.56  |
| LOC_Os07g44730.1 | expressed protein                                                             | Chr7  | 26700793 | 26705243 - | 8  | 1822 | 5.86  |
| LOC_Os04g41570.3 | ethylene-responsive protein related, putative, expressed                      | Chr4  | 24655105 | 24660068 - | 6  | 1526 | 6.81  |
| LOC_Os03g62170.2 | cyclase/dehydrase family protein, expressed                                   | Chr3  | 35212888 | 35218270 + | 11 | 2760 | 4.78  |
| LOC_Os05g46630.1 | expressed protein                                                             | Chr5  | 26995734 | 26999172 - | 7  | 1758 | 6.06  |
| LOC_Os10g26730.2 | exonuclease, putative, expressed                                              | Chr10 | 13954485 | 13958089 + | 7  | 1834 | 6.26  |
| LOC_Os09g10054.1 | disease resistance protein RPS2, putative, expressed                          | Chr9  | 5471800  | 5491310 -  | 3  | 4052 | -8.63 |
| LOC_Os04g23910.1 | OsMADS25 - MADS-box family gene with MIKCC type-box, expressed                | Chr4  | 13672710 | 13675884 + | 8  | 1358 | 6.14  |
| LOC_Os12g22030.2 | serine hydroxymethyltransferase, mitochondrial precursor, putative, expressed | Chr12 | 12392727 | 12396628 - | 4  | 2095 | 6.27  |
| LOC_Os12g22030.1 | serine hydroxymethyltransferase, mitochondrial precursor, putative, expressed | Chr12 | 12392727 | 12396638 - | 4  | 2114 | 6.27  |
| LOC_Os06g02200.1 | pentatricopeptide, putative, expressed                                        | Chr6  | 676126   | 678878 +   | 2  | 2706 | 4.86  |
| LOC_Os06g04040.1 | WD domain, G-beta repeat domain containing protein, expressed                 | Chr6  | 1648595  | 1654300 +  | 13 | 2154 | 5.56  |
| LOC_Os02g15610.1 | 40S ribosomal protein S15a, putative, expressed                               | Chr2  | 8766778  | 8769281 -  | 3  | 964  | 6.09  |
| LOC_Os05g15360.2 | expressed protein                                                             | Chr5  | 8691776  | 8696448 -  | 4  | 1758 | 7.02  |
| LOC_Os06g06560.1 | starch synthase, putative, expressed                                          | Chr6  | 3079059  | 3086808 -  | 15 | 3340 | 7.44  |
| LOC_Os05g12320.1 | nodulin MtN3 family protein, putative, expressed                              | Chr5  | 7082883  | 7085033 +  | 6  | 979  | -8.09 |
| LOC_Os02g48850.1 | plant-specific domain TIGR01615 family protein, expressed                     | Chr2  | 29886240 | 29887103 + | 1  | 896  | 8.13  |
| LOC_Os01g65094.1 | expressed protein                                                             | Chr1  | 37782927 | 37785412 - | 2  | 1120 | 7.41  |
| LOC_Os12g42210.1 | OsDegp15 - Putative Deg protease homologue, expressed                         | Chr12 | 26180159 | 26184989 + | 8  | 1532 | 6.45  |
| LOC_Os07g41800.1 | peroxisome assembly protein, putative, expressed                              | Chr7  | 25039214 | 25043735 + | 11 | 1997 | 5.63  |
| LOC_Os11g44990.1 | NB-ARC domain containing protein, expressed                                   | Chr11 | 27242070 | 27245161 + | 3  | 3027 | -5.64 |
| LOC_Os03g42130.1 | gibberellin 20 oxidase 2, putative, expressed                                 | Chr3  | 23450164 | 23452171 - | 3  | 1456 | 6.85  |
| LOC_Os03g17910.1 | kinesin like protein, putative, expressed                                     | Chr3  | 9978906  | 9981030 +  | 4  | 1261 | 6.61  |
| LOC_Os01g63870.1 | nucleobase-ascorbate transporter, putative, expressed                         | Chr1  | 37060600 | 37064615 + | 8  | 1959 | 6.97  |
| LOC_Os07g41800.3 | peroxisome assembly protein, putative, expressed                              | Chr7  | 25039214 | 25043735 + | 10 | 2060 | 5.63  |
| LOC_Os01g51430.1 | green ripe-like, putative, expressed                                          | Chr1  | 29572653 | 29575706 + | 3  | 1285 | 5.76  |
| LOC_Os03g22550.1 | cation efflux family protein, putative, expressed                             | Chr3  | 12954592 | 12958421 + | 9  | 1503 | 7.37  |
| LOC_Os10g38030.1 | per1-like family protein, putative, expressed                                 | Chr10 | 20365322 | 20368287 - | 5  | 1892 | 6.18  |
| LOC_Os05g45720.2 | starch synthase, putative, expressed                                          | Chr5  | 26485812 | 26494112 + | 15 | 3762 | 7.45  |
| LOC_Os08g10450.1 | nucleoside transporter, putative, expressed                                   | Chr8  | 6142125  | 6144418 -  | 2  | 1683 | 6.03  |
| LOC_Os10g04580.1 | ras-related protein, putative, expressed                                      | Chr10 | 2178608  | 2183211 -  | 7  | 2113 | 4.93  |
| LOC_Os03g40780.2 | transport protein-related, putative, expressed                                | Chr3  | 22670460 | 22675791 - | 4  | 3760 | 5.37  |
| LOC_Os07g41800.2 | peroxisome assembly protein, putative, expressed                              | Chr7  | 25039214 | 25043735 + | 10 | 2181 | 5.63  |
| LOC_Os03g58630.1 | thioredoxin, putative, expressed                                              | Chr3  | 33391353 | 33393615 - | 3  | 935  | 7.04  |
| LOC_Os12g02950.1 | EMB2748, putative, expressed                                                  | Chr12 | 1093738  | 1096564 -  | 7  | 1538 | 6.66  |
| LOC_Os06g12460.1 | CSLA3 - cellulose synthase-like family A%3B mannan synthase, expressed        | Chr6  | 6758181  | 6762995 +  | 12 | 2220 | 6.64  |
| LOC_Os01g22010.2 | S-adenosylmethionine synthetase, putative, expressed                          | Chr1  | 12363709 | 12365742 - | 1  | 2066 | -5.86 |

|                  |                                                                           |       |          |            |    |      |       |
|------------------|---------------------------------------------------------------------------|-------|----------|------------|----|------|-------|
| LOC_Os10g40370.1 | expressed protein                                                         | Chr10 | 21623619 | 21624757 + | 1  | 1171 | 5.79  |
| LOC_Os03g02960.1 | nascent polypeptide-associated complex subunit alpha, putative, expressed | Chr3  | 1194255  | 1196505 +  | 3  | 2011 | 6.45  |
| LOC_Os01g56870.1 | expressed protein                                                         | Chr1  | 32842662 | 32847884 + | 10 | 2871 | 5.76  |
| LOC_Os08g40140.2 | geranylgeranyl transferase type-2 subunit beta, putative, expressed       | Chr8  | 25401248 | 25404642 + | 8  | 1760 | 5.82  |
| LOC_Os10g42170.1 | GTPase of unknown function domain containing protein, putative, expressed | Chr10 | 22680086 | 22682202 + | 8  | 1371 | 5.39  |
| LOC_Os06g22670.1 | tesmin/TSO1-like CXC domain containing protein, expressed                 | Chr6  | 13182291 | 13189126 - | 9  | 2283 | 5.85  |
| LOC_Os03g63500.2 | ATPase, AFG1 family domain containing protein, expressed                  | Chr3  | 35868698 | 35875491 - | 13 | 2794 | 5.21  |
| LOC_Os12g34022.1 | retrotransposon protein, putative, unclassified, expressed                | Chr12 | 20545013 | 20546074 + | 1  | 1094 | 7.59  |
| LOC_Os10g25320.1 | initiation factor 2 subunit family domain containing protein, expressed   | Chr10 | 13090534 | 13096750 - | 9  | 2591 | 5.95  |
| LOC_Os08g40580.3 | methyltransferase domain containing protein, expressed                    | Chr8  | 25687620 | 25690627 - | 9  | 1316 | 6.71  |
| LOC_Os05g38170.1 | phosphoribosyl transferase, putative, expressed                           | Chr5  | 22387948 | 22392458 - | 11 | 1725 | 7.06  |
| LOC_Os10g04580.2 | ras-related protein, putative, expressed                                  | Chr10 | 2178608  | 2183194 -  | 7  | 2067 | 4.92  |
| LOC_Os10g41083.1 | uncharacterized Cys-rich domain containing protein, putative, expressed   | Chr10 | 22062365 | 22065838 - | 4  | 1209 | 6.62  |
| LOC_Os03g40780.1 | transport protein-related, putative, expressed                            | Chr3  | 22670460 | 22675791 - | 5  | 3570 | 5.37  |
| LOC_Os11g25130.1 | expressed protein                                                         | Chr11 | 14312200 | 14314641 - | 4  | 1937 | 7.92  |
| LOC_Os07g26520.1 | expressed protein                                                         | Chr7  | 15281842 | 15282673 - | 3  | 375  | -6.28 |
| LOC_Os05g15360.5 | expressed protein                                                         | Chr5  | 8691772  | 8696463 -  | 3  | 1789 | 7.13  |
| LOC_Os03g12510.1 | non-symbiotic hemoglobin 2, putative, expressed                           | Chr3  | 6624958  | 6626083 -  | 4  | 931  | 9.14  |
| LOC_Os05g15360.1 | expressed protein                                                         | Chr5  | 8691776  | 8696463 -  | 4  | 1885 | 7.14  |
| LOC_Os03g17050.1 | expressed protein                                                         | Chr3  | 9480106  | 9489032 +  | 22 | 4121 | 5.02  |
| LOC_Os04g58560.1 | cysteine protease ATG4, putative, expressed                               | Chr4  | 34816644 | 34820086 - | 9  | 2470 | 7.27  |
| LOC_Os05g15360.3 | expressed protein                                                         | Chr5  | 8691772  | 8696463 -  | 3  | 1928 | 7.14  |
| LOC_Os01g53890.1 | RNA methyltransferase, TrmH family protein, putative, expressed           | Chr1  | 30984518 | 30986791 - | 1  | 2306 | 5.36  |
| LOC_Os08g40940.1 | expressed protein                                                         | Chr8  | 25909390 | 25910674 + | 2  | 1275 | -7.91 |
| LOC_Os01g64720.1 | expressed protein                                                         | Chr1  | 37551977 | 37556502 + | 13 | 1896 | 6.23  |
| LOC_Os06g45100.1 | FAD binding domain of DNA photolyase domain containing protein, expressed | Chr6  | 27275439 | 27278872 - | 12 | 2307 | 6.55  |
| LOC_Os01g64720.2 | expressed protein                                                         | Chr1  | 37551990 | 37556502 + | 12 | 1948 | 6.23  |
| LOC_Os04g16794.1 | hypothetical protein                                                      | Chr4  | 9144409  | 9144625 +  | 1  | 249  | 5.71  |
| LOC_Os09g28060.1 | MORN repeat domain containing protein, expressed                          | Chr9  | 17033402 | 17035510 - | 3  | 1933 | 5.65  |
| LOC_Os05g43670.1 | IQ calmodulin-binding motif family protein, putative, expressed           | Chr5  | 25390732 | 25392521 - | 2  | 1770 | 6.07  |
| LOC_Os04g58560.2 | cysteine protease ATG4, putative, expressed                               | Chr4  | 34816665 | 34820086 - | 10 | 2395 | 7.24  |
| LOC_Os10g39810.2 | fatty acid hydroxylase, putative, expressed                               | Chr10 | 21308453 | 21311416 + | 4  | 1123 | 6.24  |
| LOC_Os10g38274.1 | ATP synthase C chain, putative, expressed                                 | Chr10 | 20481489 | 20481734 - | 1  | 278  | 4.66  |
| LOC_Os10g32690.1 | expressed protein                                                         | Chr10 | 17116302 | 17121045 - | 2  | 1360 | 6.43  |
| LOC_Os10g11140.2 | phosphoglucomutase, putative, expressed                                   | Chr10 | 6167111  | 6174631 -  | 21 | 3118 | 6.88  |
| LOC_Os01g70920.3 | cullin-1, putative, expressed                                             | Chr1  | 41052348 | 41056649 + | 8  | 1833 | 7.14  |
| LOC_Os03g12810.1 | maf, putative, expressed                                                  | Chr3  | 6871765  | 6875398 -  | 9  | 1294 | 6.29  |
| LOC_Os01g49890.1 | threonine synthase, chloroplast precursor, putative, expressed            | Chr1  | 28653963 | 28655948 - | 1  | 2018 | 5.29  |
| LOC_Os11g47809.1 | metallothionein, putative, expressed                                      | Chr11 | 28827676 | 28828513 + | 2  | 761  | -6.07 |
| LOC_Os03g63500.1 | ATPase, AFG1 family domain containing protein, expressed                  | Chr3  | 35868698 | 35875491 - | 14 | 2588 | 5.18  |
| LOC_Os08g40580.1 | methyltransferase domain containing protein, expressed                    | Chr8  | 25687620 | 25690627 - | 9  | 1370 | 6.83  |
| LOC_Os10g11140.1 | phosphoglucomutase, putative, expressed                                   | Chr10 | 6167111  | 6174631 -  | 22 | 2961 | 6.87  |
| LOC_Os05g15770.1 | glycosyl hydrolase, putative, expressed                                   | Chr5  | 8902479  | 8903793 -  | 1  | 1347 | -4.82 |
| LOC_Os08g40580.2 | methyltransferase domain containing protein, expressed                    | Chr8  | 25687727 | 25690627 - | 9  | 1258 | 6.74  |
| LOC_Os08g45230.1 | ENTH domain containing protein, expressed                                 | Chr8  | 28399620 | 28401379 + | 1  | 1792 | 6.27  |

|                  |                                                                                           |       |          |            |    |      |       |
|------------------|-------------------------------------------------------------------------------------------|-------|----------|------------|----|------|-------|
| LOC_Os05g50410.2 | Rad21 / Rec8 like protein, putative, expressed                                            | Chr5  | 28889622 | 28896998 + | 21 | 3021 | 7.93  |
| LOC_Os03g47740.3 | homeodomain protein, putative, expressed                                                  | Chr3  | 27057559 | 27062890 - | 6  | 2844 | -5.73 |
| LOC_Os04g33460.1 | 1,4-alpha-glucan-branching enzyme 2, chloroplast precursor, putative, expressed           | Chr4  | 20239790 | 20243460 - | 10 | 1586 | 5.52  |
| LOC_Os03g16130.4 | CAMK_CAMK_like_ULKh_APGy.2 - CAMK includes calcium/calmodulin depeident protein kinases,  | Chr3  | 8896203  | 8901979 -  | 11 | 3206 | 5.20  |
| LOC_Os01g37870.2 | PPR repeat domain containing protein, putative, expressed                                 | Chr1  | 21195432 | 21201747 + | 12 | 2956 | 4.84  |
| LOC_Os09g35690.2 | zinc RING finger protein, putative, expressed                                             | Chr9  | 20528479 | 20532250 - | 7  | 1628 | 5.61  |
| LOC_Os08g40580.4 | methyltransferase domain containing protein, expressed                                    | Chr8  | 25687638 | 25690627 - | 9  | 1348 | 6.82  |
| LOC_Os09g35690.1 | zinc RING finger protein, putative, expressed                                             | Chr9  | 20528479 | 20532250 - | 7  | 1618 | 5.61  |
| LOC_Os01g34620.8 | OsGrx_S15.1 - glutaredoxin subgroup II, expressed                                         | Chr1  | 19089932 | 19093121 + | 6  | 2434 | 5.38  |
| LOC_Os03g42480.1 | expressed protein                                                                         | Chr3  | 23633268 | 23640054 - | 3  | 700  | 6.51  |
| LOC_Os03g42480.2 | expressed protein                                                                         | Chr3  | 23633268 | 23640082 - | 3  | 690  | 6.51  |
| LOC_Os03g22050.3 | CAMK_KIN1/SNF1/Nim1_like.16 - CAMK includes calcium/calmodulin depeident protein kinases, | Chr3  | 12630705 | 12634427 - | 1  | 3755 | -5.35 |
| LOC_Os07g22950.2 | adenylate kinase isoenzyme 6, putative, expressed                                         | Chr7  | 12926448 | 12930711 + | 4  | 1046 | 5.86  |
| LOC_Os09g07140.1 | retrotransposon protein, putative, Ty3-gypsy subclass, expressed                          | Chr9  | 3486176  | 3488666 +  | 3  | 696  | 5.81  |
| LOC_Os06g49510.2 | zinc knuckle family protein, putative, expressed                                          | Chr6  | 29990034 | 29992228 - | 3  | 1771 | 6.79  |
| LOC_Os01g07570.1 | carboxyl-terminal proteinase, putative, expressed                                         | Chr1  | 3633275  | 3639164 -  | 7  | 2187 | 6.48  |
| LOC_Os01g47080.1 | pyruvate kinase, putative, expressed                                                      | Chr1  | 26888393 | 26895732 - | 12 | 2630 | 7.43  |
| LOC_Os10g25320.3 | initiation factor 2 subunit family domain containing protein, expressed                   | Chr10 | 13091456 | 13096704 - | 9  | 1616 | 6.25  |
| LOC_Os01g34610.1 | expressed protein                                                                         | Chr1  | 19079248 | 19083485 + | 6  | 2050 | 5.50  |
| LOC_Os06g43570.1 | peptidase, T1 family, putative, expressed                                                 | Chr6  | 26199320 | 26204623 - | 8  | 1629 | 6.60  |
| LOC_Os07g22950.1 | adenylate kinase isoenzyme 6, putative, expressed                                         | Chr7  | 12926466 | 12930711 + | 3  | 1074 | 5.86  |
| LOC_Os07g22950.3 | adenylate kinase isoenzyme 6, putative, expressed                                         | Chr7  | 12926448 | 12930711 + | 3  | 1040 | 5.85  |
| LOC_Os01g37870.3 | PPR repeat domain containing protein, putative, expressed                                 | Chr1  | 21195432 | 21201638 + | 11 | 2885 | 4.82  |
| LOC_Os10g25320.2 | initiation factor 2 subunit family domain containing protein, expressed                   | Chr10 | 13091456 | 13096750 - | 9  | 1666 | 6.25  |
| LOC_Os05g02410.1 | expressed protein                                                                         | Chr5  | 791891   | 794673 +   | 3  | 877  | 5.74  |
| LOC_Os03g16130.2 | CAMK_CAMK_like_ULKh_APGy.2 - CAMK includes calcium/calmodulin depeident protein kinases,  | Chr3  | 8896203  | 8901979 -  | 12 | 3152 | 5.19  |
| LOC_Os01g72880.1 | DNA mismatch repair protein Mlh1, putative, expressed                                     | Chr1  | 42268880 | 42274913 + | 16 | 3135 | 6.36  |
| LOC_Os06g48200.1 | glycosyl hydrolases family 16, putative, expressed                                        | Chr6  | 29156425 | 29157883 - | 3  | 1390 | 6.04  |
| LOC_Os03g22050.1 | CAMK_KIN1/SNF1/Nim1_like.16 - CAMK includes calcium/calmodulin depeident protein kinases, | Chr3  | 12630705 | 12635182 - | 2  | 3824 | -5.34 |
| LOC_Os06g07550.1 | PPR repeat domain containing protein, putative, expressed                                 | Chr6  | 3640786  | 3643651 +  | 3  | 2647 | 5.88  |
| LOC_Os01g07280.1 | disease resistance protein, putative, expressed                                           | Chr1  | 3431606  | 3435618 -  | 5  | 3112 | 5.72  |
| LOC_Os01g32980.1 | mitochondrial carrier protein, putative, expressed                                        | Chr1  | 18101551 | 18111348 - | 9  | 2002 | 6.53  |
| LOC_Os03g22050.2 | CAMK_KIN1/SNF1/Nim1_like.16 - CAMK includes calcium/calmodulin depeident protein kinases, | Chr3  | 12630705 | 12635182 - | 2  | 3818 | -5.34 |
| LOC_Os03g14020.1 | AGAP009131-PA, putative, expressed                                                        | Chr3  | 7603067  | 7607609 +  | 7  | 1548 | 6.27  |
| LOC_Os06g05390.2 | expressed protein                                                                         | Chr6  | 2433393  | 2437334 -  | 9  | 2067 | 6.67  |
| LOC_Os05g15360.7 | expressed protein                                                                         | Chr5  | 8691772  | 8696463 -  | 5  | 1527 | 7.05  |
| LOC_Os01g37820.1 | oxidoreductase/ transition metal ion binding protein, putative, expressed                 | Chr1  | 21151490 | 21155639 - | 7  | 1970 | 7.78  |
| LOC_Os05g15360.4 | expressed protein                                                                         | Chr5  | 8691772  | 8696463 -  | 4  | 1436 | 7.05  |
| LOC_Os06g21680.1 | expressed protein                                                                         | Chr6  | 12513741 | 12514685 - | 2  | 715  | 5.79  |
| LOC_Os03g25050.1 | chaperonin, putative, expressed                                                           | Chr3  | 14298390 | 14301345 - | 3  | 767  | 6.88  |
| LOC_Os04g46100.1 | expressed protein                                                                         | Chr4  | 27318314 | 27323409 - | 6  | 2283 | 7.01  |
| LOC_Os06g05390.1 | expressed protein                                                                         | Chr6  | 2433393  | 2437377 -  | 9  | 1792 | 6.51  |
| LOC_Os08g32630.1 | FAD dependent oxidoreductase, putative, expressed                                         | Chr8  | 20208860 | 20218829 + | 18 | 2797 | 6.81  |
| LOC_Os06g13020.1 | DNA polymerase lambda, putative, expressed                                                | Chr6  | 7128119  | 7133515 -  | 14 | 2401 | 4.56  |
| LOC_Os08g32630.2 | FAD dependent oxidoreductase, putative, expressed                                         | Chr8  | 20208860 | 20218829 + | 18 | 2810 | 6.81  |

|                  |                                                                                               |       |          |            |    |      |       |
|------------------|-----------------------------------------------------------------------------------------------|-------|----------|------------|----|------|-------|
| LOC_Os01g18280.1 | SNF7 domain containing protein, putative, expressed                                           | Chr1  | 10262946 | 10267962 + | 9  | 2099 | 5.24  |
| LOC_Os06g41740.1 | transposon protein, putative, CACTA, En/Spm sub-class, expressed                              | Chr6  | 25020457 | 25021422 - | 1  | 998  | -7.31 |
| LOC_Os01g15399.2 | expressed protein                                                                             | Chr1  | 8630317  | 8633592 -  | 5  | 2888 | 6.80  |
| LOC_Os05g45760.1 | EMB1796, putative, expressed                                                                  | Chr5  | 26504419 | 26506627 - | 1  | 2241 | 6.78  |
| LOC_Os04g49920.1 | sensitivity to red light reduced protein 1, putative, expressed                               | Chr4  | 29770168 | 29773759 - | 5  | 2836 | 6.20  |
| LOC_Os07g28280.1 | ubiquitin-related modifier 1, putative, expressed                                             | Chr7  | 16522444 | 16524087 - | 4  | 858  | 6.52  |
| LOC_Os01g03340.1 | BBTI4 - Bowman-Birk type bran trypsin inhibitor precursor, expressed                          | Chr1  | 1347567  | 1348786 -  | 1  | 1252 | -5.35 |
| LOC_Os03g16130.1 | CAMK_CAMK_like_ULKh_APGy.2 - CAMK includes calcium/calmodulin depedent protein kinases,       | Chr3  | 8896186  | 8901979 -  | 13 | 3112 | 5.18  |
| LOC_Os08g32630.4 | FAD dependent oxidoreductase, putative, expressed                                             | Chr8  | 20208860 | 20218829 + | 17 | 2856 | 6.81  |
| LOC_Os09g25690.1 | retrotransposon protein, putative, unclassified, expressed                                    | Chr9  | 15420770 | 15421567 - | 1  | 830  | -9.44 |
| LOC_Os01g15399.1 | expressed protein                                                                             | Chr1  | 8630317  | 8633592 -  | 5  | 2780 | 6.79  |
| LOC_Os08g32630.3 | FAD dependent oxidoreductase, putative, expressed                                             | Chr8  | 20208860 | 20218837 + | 17 | 2880 | 6.81  |
| LOC_Os01g42120.1 | expressed protein                                                                             | Chr1  | 23881900 | 23884206 + | 5  | 785  | 5.49  |
| LOC_Os02g49326.1 | SET domain-containing protein, putative, expressed                                            | Chr2  | 30144260 | 30148692 + | 13 | 2347 | 6.48  |
| LOC_Os02g15700.1 | expressed protein                                                                             | Chr2  | 8842927  | 8844249 -  | 1  | 1355 | -8.92 |
| LOC_Os11g37300.1 | OsFBDUF53 - F-box and DUF domain containing protein, expressed                                | Chr11 | 22025760 | 22029748 + | 3  | 3445 | 6.42  |
| LOC_Os03g55310.1 | SWIB/MDM2 domain containing protein, expressed                                                | Chr3  | 31469919 | 31471769 - | 2  | 857  | 5.46  |
| LOC_Os01g59160.1 | UBA/TS-N domain containing protein, expressed                                                 | Chr1  | 34175921 | 34179798 - | 8  | 1507 | 6.12  |
| LOC_Os03g47740.2 | homeodomain protein, putative, expressed                                                      | Chr3  | 27057559 | 27063684 - | 6  | 3181 | -5.67 |
| LOC_Os12g27994.1 | expressed protein                                                                             | Chr12 | 16500199 | 16504887 - | 2  | 1671 | 4.54  |
| LOC_Os07g02950.1 | expressed protein                                                                             | Chr7  | 1096376  | 1101697 -  | 11 | 3019 | 5.03  |
| LOC_Os07g39090.1 | pentatricopeptide repeat domain containing protein, putative, expressed                       | Chr7  | 23425405 | 23430886 - | 6  | 3228 | 5.41  |
| LOC_Os08g19470.1 | expressed protein                                                                             | Chr8  | 11630390 | 11631400 + | 6  | 462  | 6.94  |
| LOC_Os07g35790.1 | TKL_IRAK_DUF26-ld.5 - DUF26 kinases have homology to DUF26 containing loci, expressed         | Chr7  | 21434557 | 21437671 - | 7  | 2504 | -7.17 |
| LOC_Os07g32730.1 | DNA repair protein rhp16, putative, expressed                                                 | Chr7  | 19541481 | 19545806 + | 11 | 1834 | 5.35  |
| LOC_Os09g39580.1 | calmodulin-binding heat-shock protein, putative, expressed                                    | Chr9  | 22716054 | 22719930 - | 3  | 3350 | 5.83  |
| LOC_Os03g47740.1 | homeodomain protein, putative, expressed                                                      | Chr3  | 27057031 | 27063684 - | 7  | 3118 | -5.83 |
| LOC_Os04g49450.2 | MYB family transcription factor, putative, expressed                                          | Chr4  | 29500955 | 29503775 - | 6  | 2281 | 7.11  |
| LOC_Os03g16130.6 | CAMK_CAMK_like_ULKh_APGy.2 - CAMK includes calcium/calmodulin depedent protein kinases,       | Chr3  | 8896203  | 8901979 -  | 12 | 3092 | 5.16  |
| LOC_Os01g72020.1 | BTBA3 - Bric-a-Brac, Tramtrack, Broad Complex BTB domain with Ankyrin repeat region, expresse | Chr1  | 41741160 | 41744666 - | 2  | 2348 | 5.89  |
| LOC_Os01g65830.1 | acyl-desaturase, chloroplast precursor, putative, expressed                                   | Chr1  | 38224419 | 38226031 + | 2  | 1591 | 8.11  |
| LOC_Os02g49450.1 | BSD domain-containing protein, putative, expressed                                            | Chr2  | 30220528 | 30223990 + | 6  | 1615 | 8.27  |
| LOC_Os03g16130.3 | CAMK_CAMK_like_ULKh_APGy.2 - CAMK includes calcium/calmodulin depedent protein kinases,       | Chr3  | 8896203  | 8901979 -  | 12 | 3119 | 5.17  |
| LOC_Os03g55360.1 | heat shock protein DnaJ, putative, expressed                                                  | Chr3  | 31495921 | 31500606 + | 7  | 2974 | 6.87  |
| LOC_Os01g12660.1 | AAA-type ATPase family protein, putative, expressed                                           | Chr1  | 6970861  | 6976710 -  | 15 | 3447 | 7.82  |
| LOC_Os04g44590.1 | expressed protein                                                                             | Chr4  | 26387544 | 26391274 + | 4  | 1063 | 5.49  |
| LOC_Os12g27994.2 | expressed protein                                                                             | Chr12 | 16500199 | 16507888 - | 2  | 1574 | 4.54  |
| LOC_Os04g49450.1 | MYB family transcription factor, putative, expressed                                          | Chr4  | 29500951 | 29503775 - | 6  | 2210 | 7.11  |
| LOC_Os01g04720.2 | leucine-rich repeat protein-related, putative, expressed                                      | Chr1  | 2130798  | 2137310 +  | 7  | 4093 | 6.19  |
| LOC_Os02g52300.1 | CPuORF38 - conserved peptide uORF-containing transcript, expressed                            | Chr2  | 32021572 | 32023233 + | 1  | 1694 | 6.15  |
| LOC_Os03g51090.1 | OsFBDUF17 - F-box and DUF domain containing protein, expressed                                | Chr3  | 29209943 | 29212204 + | 2  | 2188 | 6.57  |
| LOC_Os05g12280.1 | clumping factor A precursor, putative, expressed                                              | Chr5  | 7049881  | 7050866 -  | 1  | 1018 | -8.55 |
| LOC_Os06g06790.1 | OsPDIL1-5 protein disulfide isomerase PDIL1-5, expressed                                      | Chr6  | 3199337  | 3203979 +  | 12 | 2522 | 6.13  |
| LOC_Os02g42412.1 | F-box/LRR-repeat protein 2, putative, expressed                                               | Chr2  | 25514508 | 25515647 - | 1  | 1172 | 6.88  |
| LOC_Os02g56320.1 | glycogen synthase 1, putative, expressed                                                      | Chr2  | 34475930 | 34483804 + | 23 | 3431 | 7.10  |

|                  |                                                                                                  |       |          |            |    |      |        |
|------------------|--------------------------------------------------------------------------------------------------|-------|----------|------------|----|------|--------|
| LOC_Os03g05049.1 | expressed protein                                                                                | Chr3  | 2460730  | 2462190 +  | 1  | 1493 | 5.70   |
| LOC_Os10g06700.1 | OsFBX375 - F-box domain containing protein, expressed                                            | Chr10 | 3468006  | 3469320 +  | 1  | 1347 | 5.75   |
| LOC_Os01g65530.1 | RNA recognition motif containing protein, putative, expressed                                    | Chr1  | 38031498 | 38035556 + | 6  | 1458 | 5.70   |
| LOC_Os01g70920.2 | cullin-1, putative, expressed                                                                    | Chr1  | 41052348 | 41056649 + | 9  | 2051 | 7.42   |
| LOC_Os06g41710.1 | CW-type Zinc Finger, putative, expressed                                                         | Chr6  | 24986838 | 24998104 - | 18 | 3881 | 6.41   |
| LOC_Os11g14230.1 | uncharacterized protein yqxC, putative, expressed                                                | Chr11 | 7964439  | 7969046 -  | 9  | 1655 | 6.94   |
| LOC_Os11g44960.1 | NBS-LRR disease resistance protein, putative, expressed                                          | Chr11 | 27221855 | 27226087 + | 2  | 3334 | -4.80  |
| LOC_Os02g53340.2 | cyclic nucleotide-gated ion channel, putative, expressed                                         | Chr2  | 32648606 | 32659775 + | 13 | 3152 | 6.93   |
| LOC_Os07g33050.1 | expressed protein                                                                                | Chr7  | 19740385 | 19742856 - | 4  | 2332 | 6.59   |
| LOC_Os03g48040.2 | 2Fe-2S iron-sulfur cluster binding domain containing protein, expressed                          | Chr3  | 27309859 | 27312904 + | 8  | 1226 | 5.67   |
| LOC_Os03g48040.1 | 2Fe-2S iron-sulfur cluster binding domain containing protein, expressed                          | Chr3  | 27309857 | 27312904 + | 8  | 1234 | 5.67   |
| LOC_Os05g32180.1 | acetyltransferase, GNAT family, putative, expressed                                              | Chr5  | 18763653 | 18767184 - | 9  | 2177 | 5.07   |
| LOC_Os12g41950.1 | auxin response factor, putative, expressed                                                       | Chr12 | 26002359 | 26008415 - | 14 | 4408 | 6.96   |
| LOC_Os03g16960.1 | cysteine-rich repeat secretory protein 55 precursor, putative, expressed                         | Chr3  | 9425490  | 9426843 -  | 2  | 1330 | -10.80 |
| LOC_Os09g21760.1 | proteasome subunit, putative, expressed                                                          | Chr9  | 13174382 | 13178163 - | 12 | 1998 | 6.12   |
| LOC_Os02g30114.1 | expressed protein                                                                                | Chr2  | 17887846 | 17889802 - | 4  | 1628 | 6.34   |
| LOC_Os01g21860.1 | AGAP010768-PA, putative, expressed                                                               | Chr1  | 12264911 | 12269085 + | 7  | 1184 | 5.59   |
| LOC_Os03g08680.2 | pentatricopeptide, putative, expressed                                                           | Chr3  | 4470565  | 4476109 -  | 7  | 2108 | 6.38   |
| LOC_Os04g44590.3 | expressed protein                                                                                | Chr4  | 26387544 | 26391345 + | 5  | 878  | 5.29   |
| LOC_Os06g17880.1 | NBS-LRR disease resistance protein, putative, expressed                                          | Chr6  | 10375846 | 10380263 + | 2  | 3292 | 7.89   |
| LOC_Os07g14350.1 | methyltransferase, putative, expressed                                                           | Chr7  | 8194024  | 8199887 +  | 7  | 1616 | 5.83   |
| LOC_Os03g58540.1 | spo0B-associated GTP-binding protein, putative, expressed                                        | Chr3  | 33334430 | 33338512 + | 9  | 2209 | 6.36   |
| LOC_Os07g30150.1 | phosphoribosyl transferase, putative, expressed                                                  | Chr7  | 17787745 | 17801445 - | 6  | 1372 | 5.63   |
| LOC_Os01g57480.1 | serine/threonine-protein kinase receptor precursor, putative, expressed                          | Chr1  | 33210230 | 33216333 + | 9  | 3755 | 6.97   |
| LOC_Os04g09350.2 | expressed protein                                                                                | Chr4  | 4969979  | 4975369 +  | 2  | 1960 | 7.03   |
| LOC_Os05g49300.1 | iron-sulfur cluster assembly enzyme ISCU, mitochondrial precursor, putative, expressed           | Chr5  | 28289829 | 28293272 + | 3  | 1073 | 7.74   |
| LOC_Os01g70920.1 | cullin-1, putative, expressed                                                                    | Chr1  | 41052359 | 41056649 + | 10 | 2171 | 7.42   |
| LOC_Os04g39130.1 | expressed protein                                                                                | Chr4  | 23272614 | 23275363 + | 4  | 1400 | 5.81   |
| LOC_Os02g26790.1 | expressed protein                                                                                | Chr2  | 15725681 | 15726657 - | 3  | 894  | 5.59   |
| LOC_Os09g38268.1 | RNA polymerase IV largest subunit, putative, expressed                                           | Chr9  | 22029199 | 22032739 + | 6  | 1587 | 6.66   |
| LOC_Os02g06470.1 | OsFBX38 - F-box domain containing protein, expressed                                             | Chr2  | 3227508  | 3229370 +  | 1  | 1895 | 5.93   |
| LOC_Os01g34620.2 | OsGrx_S15.1 - glutaredoxin subgroup II, expressed                                                | Chr1  | 19089932 | 19094304 + | 9  | 1784 | 5.01   |
| LOC_Os01g34620.1 | OsGrx_S15.1 - glutaredoxin subgroup II, expressed                                                | Chr1  | 19089909 | 19094304 + | 9  | 1830 | 5.01   |
| LOC_Os01g34620.7 | OsGrx_S15.1 - glutaredoxin subgroup II, expressed                                                | Chr1  | 19089909 | 19094304 + | 9  | 1831 | 5.01   |
| LOC_Os01g72870.3 | BAS1, putative, expressed                                                                        | Chr1  | 42265021 | 42268472 - | 13 | 1633 | 6.19   |
| LOC_Os12g32630.1 | OsFBX448 - F-box domain containing protein, expressed                                            | Chr12 | 19684832 | 19687895 - | 2  | 1684 | 5.84   |
| LOC_Os03g27780.1 | protein phosphatase protein, putative, expressed                                                 | Chr3  | 15932524 | 15936871 + | 9  | 2810 | 5.01   |
| LOC_Os01g49930.1 | expressed protein                                                                                | Chr1  | 28675508 | 28680156 - | 7  | 2448 | 4.90   |
| LOC_Os02g26850.1 | rRNA-processing protein FCF, putative, expressed                                                 | Chr2  | 15762105 | 15765880 - | 5  | 1567 | 5.90   |
| LOC_Os01g72870.2 | BAS1, putative, expressed                                                                        | Chr1  | 42265021 | 42268518 - | 13 | 1687 | 6.19   |
| LOC_Os06g30380.1 | GTP binding protein, putative, expressed                                                         | Chr6  | 17550089 | 17553470 + | 3  | 2482 | 6.71   |
| LOC_Os02g53340.1 | cyclic nucleotide-gated ion channel, putative, expressed                                         | Chr2  | 32648606 | 32659777 + | 14 | 3250 | 6.98   |
| LOC_Os02g54900.1 | STE_PAK_Ste20_STLK.2 - STE kinases include homologs to sterile 7, sterile 11 and sterile 20 from | Chr2  | 33623756 | 33630043 + | 19 | 3606 | 6.28   |
| LOC_Os04g44290.1 | expressed protein                                                                                | Chr4  | 26232855 | 26237506 + | 8  | 2988 | 8.11   |
| LOC_Os09g26190.1 | CBS domain containing protein, expressed                                                         | Chr9  | 15790768 | 15800951 + | 12 | 2815 | 5.35   |

|                  |                                                                                               |       |          |            |    |      |       |
|------------------|-----------------------------------------------------------------------------------------------|-------|----------|------------|----|------|-------|
| LOC_Os07g08120.2 | BTBT2 - Bric-a-Brac, Tramtrack, Broad Complex BTB domain with tetratricopeptide repeats, expr | Chr7  | 4118354  | 4123587 +  | 6  | 3749 | 5.40  |
| LOC_Os11g17600.2 | roothairless 1, putative, expressed                                                           | Chr11 | 9794908  | 9810269 +  | 26 | 4102 | 5.97  |
| LOC_Os08g32630.5 | FAD dependent oxidoreductase, putative, expressed                                             | Chr8  | 20208860 | 20218829 + | 17 | 2853 | 6.92  |
| LOC_Os01g16100.1 | translin, putative, expressed                                                                 | Chr1  | 9067360  | 9071396 -  | 7  | 1713 | 6.83  |
| LOC_Os02g07150.1 | urease accessory protein F, putative, expressed                                               | Chr2  | 3674673  | 3677044 +  | 1  | 2404 | 6.95  |
| LOC_Os06g40510.1 | CRAL/TRIO domain containing protein, expressed                                                | Chr6  | 24142814 | 24147311 - | 12 | 1377 | 5.09  |
| LOC_Os03g12630.1 | expressed protein                                                                             | Chr3  | 6716365  | 6720197 +  | 2  | 757  | 6.88  |
| LOC_Os03g14020.2 | AGAP009131-PA, putative, expressed                                                            | Chr3  | 7603067  | 7607605 +  | 6  | 1677 | 6.36  |
| LOC_Os07g08120.1 | BTBT2 - Bric-a-Brac, Tramtrack, Broad Complex BTB domain with tetratricopeptide repeats, expr | Chr7  | 4118354  | 4123592 +  | 5  | 3852 | 5.40  |
| LOC_Os05g24000.1 | expressed protein                                                                             | Chr5  | 13823200 | 13828651 - | 7  | 1548 | 5.91  |
| LOC_Os10g40720.1 | expansin precursor, putative, expressed                                                       | Chr10 | 21847804 | 21849726 - | 4  | 1467 | 6.18  |
| LOC_Os01g72870.1 | BAS1, putative, expressed                                                                     | Chr1  | 42265021 | 42268525 - | 14 | 1767 | 6.19  |
| LOC_Os09g16910.1 | cysteine desulfurase 1, mitochondrial precursor, putative, expressed                          | Chr9  | 10328808 | 10333390 + | 2  | 2103 | 7.60  |
| LOC_Os09g16910.3 | cysteine desulfurase 1, mitochondrial precursor, putative, expressed                          | Chr9  | 10328808 | 10333390 + | 3  | 2249 | 7.64  |
| LOC_Os01g51754.3 | alpha-amylase precursor, putative, expressed                                                  | Chr1  | 29762378 | 29766397 + | 5  | 2585 | 6.32  |
| LOC_Os10g26700.1 | YGL010w, putative, expressed                                                                  | Chr10 | 13939899 | 13941106 - | 3  | 1102 | 5.31  |
| LOC_Os01g67720.3 | ABC1 family domain containing protein, putative, expressed                                    | Chr1  | 39357455 | 39362884 - | 12 | 2316 | 6.54  |
| LOC_Os01g67720.1 | ABC1 family domain containing protein, putative, expressed                                    | Chr1  | 39357455 | 39362884 - | 12 | 2320 | 6.54  |
| LOC_Os02g14980.1 | calcium-binding EF hand family protein, putative, expressed                                   | Chr2  | 8358769  | 8362960 +  | 7  | 2593 | 5.80  |
| LOC_Os03g27780.2 | protein phosphatase protein, putative, expressed                                              | Chr3  | 15932524 | 15936871 + | 8  | 2862 | 5.04  |
| LOC_Os02g14980.2 | calcium-binding EF hand family protein, putative, expressed                                   | Chr2  | 8359318  | 8362959 +  | 6  | 2602 | 5.80  |
| LOC_Os01g34620.3 | OsGrx_S15.1 - glutaredoxin subgroup II, expressed                                             | Chr1  | 19089909 | 19093892 + | 9  | 1400 | 4.80  |
| LOC_Os04g58600.2 | L-asparaginase precursor protein, putative, expressed                                         | Chr4  | 34839496 | 34843337 + | 10 | 1963 | 6.59  |
| LOC_Os05g24000.2 | expressed protein                                                                             | Chr5  | 13823207 | 13828651 - | 7  | 1538 | 5.90  |
| LOC_Os08g33076.1 | myrosinase precursor, putative, expressed                                                     | Chr8  | 20553106 | 20557893 + | 10 | 2380 | 5.25  |
| LOC_Os01g09020.1 | WD domain, G-beta repeat domain containing protein, expressed                                 | Chr1  | 4534021  | 4540216 +  | 8  | 2898 | 6.64  |
| LOC_Os01g67720.2 | ABC1 family domain containing protein, putative, expressed                                    | Chr1  | 39357455 | 39362884 - | 11 | 2366 | 6.54  |
| LOC_Os04g53160.1 | NBS-LRR disease resistance protein, putative, expressed                                       | Chr4  | 31656691 | 31662693 + | 3  | 5924 | 6.67  |
| LOC_Os01g11880.1 | DJ-1 family protein, putative, expressed                                                      | Chr1  | 6432336  | 6436086 +  | 7  | 2382 | 6.37  |
| LOC_Os07g32950.1 | dnaJ C terminal region family protein, expressed                                              | Chr7  | 19692304 | 19695407 + | 6  | 1975 | 5.80  |
| LOC_Os04g09350.3 | expressed protein                                                                             | Chr4  | 4965526  | 4975369 +  | 2  | 1115 | 6.09  |
| LOC_Os02g53400.1 | thioredoxin, putative, expressed                                                              | Chr2  | 32684150 | 32686062 + | 5  | 1008 | 6.17  |
| LOC_Os01g52400.2 | bacterial transferase hexapeptide domain containing protein, expressed                        | Chr1  | 30102785 | 30107361 + | 11 | 2057 | 5.91  |
| LOC_Os12g16690.1 | zinc finger, C3HC4 type domain containing protein, expressed                                  | Chr12 | 9565764  | 9570986 +  | 6  | 3586 | 6.97  |
| LOC_Os02g46520.1 | hydrolase, putative, expressed                                                                | Chr2  | 28362823 | 28366935 + | 10 | 2067 | 7.83  |
| LOC_Os05g25180.1 | zinc finger, C3HC4 type family protein, expressed                                             | Chr5  | 14587893 | 14593800 - | 8  | 2418 | 5.07  |
| LOC_Os01g52400.1 | bacterial transferase hexapeptide domain containing protein, expressed                        | Chr1  | 30102785 | 30107361 + | 11 | 2081 | 5.91  |
| LOC_Os09g16910.2 | cysteine desulfurase 1, mitochondrial precursor, putative, expressed                          | Chr9  | 10328808 | 10330646 + | 1  | 1871 | 7.09  |
| LOC_Os07g47100.2 | transporter, monovalent cation%3Aproton antiporter-2 family, putative, expressed              | Chr7  | 28164412 | 28169335 + | 14 | 2842 | 7.77  |
| LOC_Os03g01190.1 | dehydrogenase, putative, expressed                                                            | Chr3  | 122870   | 125144 -   | 3  | 1596 | -5.05 |
| LOC_Os03g58540.2 | spo0B-associated GTP-binding protein, putative, expressed                                     | Chr3  | 33334430 | 33338512 + | 8  | 2293 | 6.39  |
| LOC_Os08g27040.1 | lipid phosphatase protein, putative, expressed                                                | Chr8  | 16519419 | 16523966 - | 9  | 1992 | 7.35  |
| LOC_Os04g08190.1 | expressed protein                                                                             | Chr4  | 4353140  | 4355614 +  | 1  | 2507 | 4.95  |
| LOC_Os04g36850.1 | ORG4, putative, expressed                                                                     | Chr4  | 22243852 | 22246382 + | 4  | 1053 | 7.46  |
| LOC_Os10g34602.1 | csAtPR5, putative, expressed                                                                  | Chr10 | 18446071 | 18449621 + | 3  | 1422 | 7.40  |

|                  |                                                                                             |       |          |            |    |      |       |
|------------------|---------------------------------------------------------------------------------------------|-------|----------|------------|----|------|-------|
| LOC_Os10g35450.1 | serine/threonine-protein kinase, putative, expressed                                        | Chr10 | 18970490 | 18975230 + | 8  | 2674 | 7.20  |
| LOC_Os12g04660.1 | zinc finger, C3HC4 type domain containing protein, expressed                                | Chr12 | 1973806  | 1974672 -  | 1  | 899  | 5.22  |
| LOC_Os04g47660.1 | retrotransposon protein, putative, unclassified, expressed                                  | Chr4  | 28280837 | 28282961 + | 2  | 1354 | 5.44  |
| LOC_Os03g56390.1 | tRNA wybutosine-synthesizing protein 1, putative, expressed                                 | Chr3  | 32147198 | 32150758 + | 8  | 2616 | 6.42  |
| LOC_Os01g34620.4 | OsGrx_S15.1 - glutaredoxin subgroup II, expressed                                           | Chr1  | 19089909 | 19093121 + | 8  | 1499 | 4.92  |
| LOC_Os01g34620.6 | OsGrx_S15.1 - glutaredoxin subgroup II, expressed                                           | Chr1  | 19089909 | 19093121 + | 8  | 1512 | 4.92  |
| LOC_Os01g34620.9 | OsGrx_S15.1 - glutaredoxin subgroup II, expressed                                           | Chr1  | 19089909 | 19093121 + | 8  | 1512 | 4.92  |
| LOC_Os01g34620.5 | OsGrx_S15.1 - glutaredoxin subgroup II, expressed                                           | Chr1  | 19089909 | 19093121 + | 8  | 1517 | 4.92  |
| LOC_Os07g43316.1 | SAP domain-containing protein, putative, expressed                                          | Chr7  | 25933048 | 25936540 + | 3  | 3024 | 6.27  |
| LOC_Os07g47100.1 | transporter, monovalent cation%3Aproton antiporter-2 family, putative, expressed            | Chr7  | 28164414 | 28169335 + | 15 | 2745 | 7.77  |
| LOC_Os07g43316.2 | SAP domain-containing protein, putative, expressed                                          | Chr7  | 25933048 | 25936540 + | 4  | 2976 | 6.27  |
| LOC_Os06g04350.1 | expressed protein                                                                           | Chr6  | 1849923  | 1853898 -  | 9  | 1888 | 5.42  |
| LOC_Os12g10540.3 | OsMADS13 - MADS-box family gene with MIKCC type-box, expressed                              | Chr12 | 5586131  | 5590285 +  | 7  | 1411 | 5.69  |
| LOC_Os05g29760.5 | ferrochelatase-2, chloroplast precursor, putative, expressed                                | Chr5  | 17212352 | 17216483 + | 7  | 2753 | 6.07  |
| LOC_Os02g51390.2 | expressed protein                                                                           | Chr2  | 31467395 | 31471563 + | 5  | 3534 | 5.86  |
| LOC_Os01g13300.1 | B3 DNA binding domain containing protein, expressed                                         | Chr1  | 7417303  | 7422624 +  | 9  | 2510 | 6.39  |
| LOC_Os12g32630.2 | OsFBX448 - F-box domain containing protein, expressed                                       | Chr12 | 19684832 | 19687895 - | 2  | 1951 | 5.87  |
| LOC_Os05g03640.1 | flavonol synthase/flavanone 3-hydroxylase, putative, expressed                              | Chr5  | 1561980  | 1568165 -  | 3  | 1665 | -6.35 |
| LOC_Os11g05570.1 | RNASEH2A - Putative ribonuclease H2 large subunit, expressed                                | Chr11 | 2529744  | 2532695 +  | 8  | 1573 | 6.51  |
| LOC_Os03g10990.1 | retinoblastoma-binding protein-like, putative, expressed                                    | Chr3  | 5646147  | 5650212 -  | 5  | 2556 | 5.50  |
| LOC_Os12g32280.1 | SWIB/MDM2 domain containing protein, expressed                                              | Chr12 | 19488028 | 19492689 - | 2  | 720  | 5.25  |
| LOC_Os08g03430.2 | extracellular ligand-gated ion channel, putative, expressed                                 | Chr8  | 1606315  | 1611097 +  | 5  | 2095 | 5.41  |
| LOC_Os08g39970.1 | ENT domain containing protein, expressed                                                    | Chr8  | 25321532 | 25325637 + | 8  | 1900 | 5.65  |
| LOC_Os08g36150.1 | activator of 90 kDa heat shock protein ATPase homolog, putative, expressed                  | Chr8  | 22777101 | 22781266 - | 3  | 1598 | 6.32  |
| LOC_Os05g44800.2 | expressed protein                                                                           | Chr5  | 26049874 | 26052703 + | 4  | 943  | 4.75  |
| LOC_Os09g35910.1 | homeobox associated leucine zipper, putative, expressed                                     | Chr9  | 20671754 | 20673282 + | 2  | 1499 | 5.51  |
| LOC_Os03g58540.3 | spo0B-associated GTP-binding protein, putative, expressed                                   | Chr3  | 33334430 | 33338512 + | 7  | 2381 | 6.39  |
| LOC_Os02g30114.2 | expressed protein                                                                           | Chr2  | 17887846 | 17889823 - | 4  | 1315 | 6.12  |
| LOC_Os10g26700.2 | YGL010w, putative, expressed                                                                | Chr10 | 13940043 | 13941106 - | 2  | 1023 | 5.20  |
| LOC_Os01g72800.1 | signal recognition particle receptor, putative, expressed                                   | Chr1  | 42234584 | 42237458 - | 11 | 1697 | 7.10  |
| LOC_Os12g29670.1 | expressed protein                                                                           | Chr12 | 17695043 | 17698326 + | 2  | 641  | 4.87  |
| LOC_Os02g04010.1 | cyclin-T1-1, putative, expressed                                                            | Chr2  | 1733994  | 1737711 -  | 5  | 3389 | 4.75  |
| LOC_Os06g39906.1 | homeobox domain containing protein, expressed                                               | Chr6  | 23732555 | 23734536 + | 4  | 1473 | 7.21  |
| LOC_Os02g04010.4 | cyclin-T1-1, putative, expressed                                                            | Chr2  | 1733994  | 1737711 -  | 5  | 3382 | 4.75  |
| LOC_Os03g54050.1 | anther-specific proline-rich protein APG precursor, putative, expressed                     | Chr3  | 30989898 | 30991939 + | 3  | 1709 | 5.57  |
| LOC_Os11g08660.1 | TOPBP1A - Similar to DNA replication protein TOPBP1 from, expressed                         | Chr11 | 4614156  | 4622265 +  | 16 | 3561 | 6.70  |
| LOC_Os02g04010.2 | cyclin-T1-1, putative, expressed                                                            | Chr2  | 1733994  | 1737711 -  | 6  | 2236 | 4.36  |
| LOC_Os04g51809.2 | expressed protein                                                                           | Chr4  | 30716167 | 30722227 + | 3  | 1881 | 5.75  |
| LOC_Os04g55710.1 | transposon protein, putative, unclassified, expressed                                       | Chr4  | 33161540 | 33164790 + | 3  | 1660 | 5.61  |
| LOC_Os07g34640.2 | pyruvate Pi dikinase regulatory protein, putative, expressed                                | Chr7  | 20764652 | 20767839 + | 3  | 1882 | 4.59  |
| LOC_Os06g07860.1 | cystathionine gamma-synthase, putative, expressed                                           | Chr6  | 3823021  | 3827411 +  | 12 | 2138 | 5.97  |
| LOC_Os03g20300.1 | glucose-6-phosphate 1-dehydrogenase, chloroplast precursor, putative, expressed             | Chr3  | 11468496 | 11475783 - | 13 | 3637 | 6.26  |
| LOC_Os07g15490.1 | C2-BTB1 - Bric-a-Brac, Tramtrack, Broad Complex BTB domain with C2 subfamily conserved sequ | Chr7  | 8989124  | 8992852 +  | 2  | 1238 | 6.03  |
| LOC_Os06g02340.1 | OsFBX183 - F-box domain containing protein, expressed                                       | Chr6  | 779995   | 782325 +   | 2  | 1669 | 5.55  |
| LOC_Os06g13020.2 | DNA polymerase lambda, putative, expressed                                                  | Chr6  | 7128352  | 7133515 -  | 14 | 2165 | 4.33  |

|                  |                                                                                             |       |          |            |    |      |       |
|------------------|---------------------------------------------------------------------------------------------|-------|----------|------------|----|------|-------|
| LOC_Os12g16410.3 | isoflavone reductase, putative, expressed                                                   | Chr12 | 9397034  | 9400411 -  | 3  | 1110 | 6.01  |
| LOC_Os03g55950.2 | H-BTB1 - Bric-a-Brac, Tramtrack, Broad Complex BTB domain with H family conserved sequence, | Chr3  | 31853872 | 31857850 + | 4  | 2714 | 5.16  |
| LOC_Os01g59920.1 | cysteine synthase, chloroplast precursor, putative, expressed                               | Chr1  | 34647037 | 34650771 - | 10 | 2101 | 5.84  |
| LOC_Os02g13340.1 | expressed protein                                                                           | Chr2  | 7115786  | 7119634 +  | 2  | 2740 | 6.54  |
| LOC_Os09g04550.1 | retrotransposon protein, putative, unclassified, expressed                                  | Chr9  | 2425674  | 2430409 +  | 4  | 3431 | 5.14  |
| LOC_Os10g39820.1 | zinc knuckle domain containing protein, expressed                                           | Chr10 | 21311579 | 21315431 - | 4  | 1633 | 5.22  |
| LOC_Os03g49750.1 | protein kinase family protein, putative, expressed                                          | Chr3  | 28314271 | 28319959 + | 6  | 3181 | 6.43  |
| LOC_Os11g07912.1 | MLO domain containing protein, putative, expressed                                          | Chr11 | 4086132  | 4090752 +  | 15 | 2663 | 6.55  |
| LOC_Os02g51290.1 | HVA22, putative, expressed                                                                  | Chr2  | 31407145 | 31409724 + | 6  | 1314 | 5.57  |
| LOC_Os10g16520.1 | retrotransposon protein, putative, unclassified, expressed                                  | Chr10 | 8235582  | 8237354 +  | 3  | 1713 | -4.83 |
| LOC_Os01g46570.3 | CTP synthase, putative, expressed                                                           | Chr1  | 26516899 | 26521761 + | 19 | 2651 | 6.18  |
| LOC_Os07g38940.1 | ubiquitin-conjugating enzyme, putative, expressed                                           | Chr7  | 23349422 | 23352488 + | 4  | 1057 | 5.21  |
| LOC_Os12g38660.1 | expressed protein                                                                           | Chr12 | 23750274 | 23750582 - | 1  | 341  | -5.62 |
| LOC_Os07g47100.3 | transporter, monovalent cation%3Aproton antiporter-2 family, putative, expressed            | Chr7  | 28164424 | 28168326 + | 14 | 2268 | 6.60  |
| LOC_Os11g35320.1 | BSD domain-containing protein, putative, expressed                                          | Chr11 | 20709538 | 20714204 - | 3  | 1875 | 5.67  |
| LOC_Os01g02770.1 | resistance-related receptor-like kinase, putative, expressed                                | Chr1  | 961681   | 965151 +   | 3  | 2088 | 6.48  |
| LOC_Os09g38450.1 | expressed protein                                                                           | Chr9  | 22134460 | 22137041 - | 5  | 2328 | 5.88  |
| LOC_Os10g28360.1 | 1,2-dihydroxy-3-keto-5-methylthiopentene dioxygenase protein, putative, expressed           | Chr10 | 14757124 | 14759781 - | 5  | 1305 | 6.89  |
| LOC_Os12g10540.2 | OsMADS13 - MADS-box family gene with MIKCC type-box, expressed                              | Chr12 | 5584593  | 5590285 +  | 8  | 1619 | 5.74  |
| LOC_Os01g61560.1 | phosphatidate cytidyltransferase, putative, expressed                                       | Chr1  | 35601031 | 35604029 - | 6  | 1370 | 5.35  |
| LOC_Os12g31450.1 | plastid division regulator MinE, putative, expressed                                        | Chr12 | 18913254 | 18915691 - | 2  | 1143 | 5.11  |
| LOC_Os02g35180.1 | OsRR2 type-A response regulator, expressed                                                  | Chr2  | 21128620 | 21131370 - | 6  | 1887 | 5.67  |
| LOC_Os02g38160.2 | glycosyl transferase family 17 protein, putative, expressed                                 | Chr2  | 23083106 | 23086442 - | 1  | 3369 | 5.12  |
| LOC_Os03g18540.4 | expressed protein                                                                           | Chr3  | 10381358 | 10387602 + | 13 | 2971 | 4.76  |
| LOC_Os12g05410.2 | G10 protein, putative, expressed                                                            | Chr12 | 2449160  | 2451525 +  | 4  | 903  | 5.02  |
| LOC_Os12g05410.1 | G10 protein, putative, expressed                                                            | Chr12 | 2449160  | 2451525 +  | 4  | 907  | 5.02  |
| LOC_Os03g16740.1 | protein kinase APK1A, chloroplast precursor, putative, expressed                            | Chr3  | 9269491  | 9273582 -  | 6  | 2738 | 5.06  |
| LOC_Os04g09350.4 | expressed protein                                                                           | Chr4  | 4965526  | 4975290 +  | 4  | 851  | 5.60  |
| LOC_Os03g16740.2 | protein kinase APK1A, chloroplast precursor, putative, expressed                            | Chr3  | 9269491  | 9273580 -  | 6  | 2730 | 5.06  |
| LOC_Os03g54050.2 | anther-specific proline-rich protein APG precursor, putative, expressed                     | Chr3  | 30989897 | 30991939 + | 3  | 1572 | 5.57  |
| LOC_Os03g53990.1 | expressed protein                                                                           | Chr3  | 30954503 | 30959361 + | 5  | 4117 | 5.65  |
| LOC_Os06g07474.1 | tetratricopeptide repeat domain containing protein, expressed                               | Chr6  | 3588217  | 3595865 -  | 15 | 2404 | 5.86  |
| LOC_Os08g25570.1 | histone deacetylase, putative, expressed                                                    | Chr8  | 15554139 | 15559152 + | 6  | 2056 | 5.82  |
| LOC_Os03g50110.1 | transcription regulator, putative, expressed                                                | Chr3  | 28585246 | 28586715 - | 1  | 1502 | 7.01  |
| LOC_Os04g40430.1 | surfeit locus protein, putative, expressed                                                  | Chr4  | 24026632 | 24029053 + | 5  | 1370 | 5.33  |
| LOC_Os04g40430.2 | surfeit locus protein, putative, expressed                                                  | Chr4  | 24026632 | 24029054 + | 5  | 1368 | 5.33  |
| LOC_Os02g31960.1 | ATP/GTP binding protein, putative, expressed                                                | Chr2  | 18889920 | 18897018 - | 14 | 2282 | 5.70  |
| LOC_Os06g07474.2 | tetratricopeptide repeat domain containing protein, expressed                               | Chr6  | 3588217  | 3595865 -  | 15 | 2415 | 5.86  |
| LOC_Os11g02460.3 | outer membrane protein, OMP85 family, putative, expressed                                   | Chr11 | 739096   | 742792 -   | 8  | 2519 | 4.75  |
| LOC_Os03g52750.1 | cyclin, putative, expressed                                                                 | Chr3  | 30235883 | 30241190 + | 15 | 2421 | 4.86  |
| LOC_Os03g18540.1 | expressed protein                                                                           | Chr3  | 10381358 | 10387602 + | 12 | 3140 | 4.76  |
| LOC_Os09g39180.1 | RNA recognition motif containing protein, putative, expressed                               | Chr9  | 22505003 | 22507555 - | 4  | 1509 | 5.41  |
| LOC_Os02g12480.2 | expressed protein                                                                           | Chr2  | 6508832  | 6513830 -  | 3  | 1340 | -3.74 |
| LOC_Os03g16470.2 | expressed protein                                                                           | Chr3  | 9079602  | 9081544 +  | 3  | 1172 | 6.48  |
| LOC_Os05g45350.2 | dnaJ domain containing protein, expressed                                                   | Chr5  | 26310860 | 26314173 - | 10 | 1918 | 5.60  |



|                  |                                                                                          |       |          |            |    |      |       |
|------------------|------------------------------------------------------------------------------------------|-------|----------|------------|----|------|-------|
| LOC_Os04g47670.2 | expressed protein                                                                        | Chr4  | 28284070 | 28285205 + | 3  | 885  | 7.47  |
| LOC_Os01g42780.1 | cysteine proteinase EP-B 2 precursor, putative, expressed                                | Chr1  | 24343518 | 24345173 - | 2  | 1467 | 6.29  |
| LOC_Os03g18540.2 | expressed protein                                                                        | Chr3  | 10381358 | 10387602 + | 11 | 3248 | 4.76  |
| LOC_Os05g08410.1 | ATP10 protein, expressed                                                                 | Chr5  | 4585199  | 4588999 -  | 7  | 1286 | 5.48  |
| LOC_Os11g09970.1 | OsFBX411 - F-box domain containing protein, expressed                                    | Chr11 | 5342461  | 5345614 -  | 5  | 2104 | 5.04  |
| LOC_Os03g22050.4 | CAMK_KIN1/SNF1/Nim1_like.16 - CAMK includes calcium/calmodulin depedent protein kinases, | Chr3  | 12630705 | 12634427 - | 2  | 2832 | -5.40 |
| LOC_Os03g52750.2 | cyclin, putative, expressed                                                              | Chr3  | 30235883 | 30241190 + | 15 | 2385 | 4.84  |
| LOC_Os01g68524.2 | pentatricopeptide, putative, expressed                                                   | Chr1  | 39811722 | 39819555 - | 5  | 1293 | 5.45  |
| LOC_Os04g05650.1 | expressed protein                                                                        | Chr4  | 2890372  | 2891360 -  | 4  | 713  | -7.59 |
| LOC_Os02g56950.1 | expressed protein                                                                        | Chr2  | 34907528 | 34910822 - | 9  | 2028 | 5.06  |
| LOC_Os01g61560.3 | phosphatidate cytidyltransferase, putative, expressed                                    | Chr1  | 35601031 | 35604029 - | 6  | 1429 | 5.38  |
| LOC_Os02g04010.3 | cyclin-T1-1, putative, expressed                                                         | Chr2  | 1733994  | 1737711 -  | 6  | 2874 | 4.69  |
| LOC_Os06g44840.2 | prenyltransferase, putative, expressed                                                   | Chr6  | 27087517 | 27092918 + | 12 | 1991 | 7.66  |
| LOC_Os04g40500.1 | glycosyl hydrolase family 5 protein, putative, expressed                                 | Chr4  | 24060045 | 24063819 + | 4  | 2097 | 5.86  |
| LOC_Os12g43830.1 | NUC189 domain containing protein, expressed                                              | Chr12 | 27210339 | 27213169 - | 6  | 1381 | 6.47  |
| LOC_Os09g09320.2 | nuclear transport factor, putative, expressed                                            | Chr9  | 4988972  | 4990544 +  | 2  | 892  | 5.41  |
| LOC_Os09g28560.1 | protein phosphotase protein, putative, expressed                                         | Chr9  | 17366407 | 17371403 - | 9  | 2066 | 6.15  |
| LOC_Os06g08910.3 | glutamate receptor 2.8 precursor, putative, expressed                                    | Chr6  | 4490176  | 4493930 -  | 5  | 2206 | 6.06  |
| LOC_Os05g49430.2 | aldose 1-epimerase, putative, expressed                                                  | Chr5  | 28342175 | 28345123 + | 5  | 2512 | 7.19  |
| LOC_Os01g43420.1 | expressed protein                                                                        | Chr1  | 24843730 | 24846915 - | 9  | 2062 | -4.25 |
| LOC_Os06g12160.1 | AAA-type ATPase family protein, putative, expressed                                      | Chr6  | 6503735  | 6514399 -  | 24 | 4247 | 5.81  |
| LOC_Os08g30790.2 | hypersensitive-induced response protein, putative, expressed                             | Chr8  | 19012736 | 19016000 + | 6  | 1674 | 7.30  |
| LOC_Os07g24830.1 | thionin-like peptide, putative, expressed                                                | Chr7  | 14118021 | 14118923 + | 2  | 725  | -8.09 |
| LOC_Os10g40555.1 | expressed protein                                                                        | Chr10 | 21707372 | 21709277 - | 10 | 1397 | 5.35  |
| LOC_Os06g08910.1 | glutamate receptor 2.8 precursor, putative, expressed                                    | Chr6  | 4490176  | 4493909 -  | 5  | 2150 | 6.06  |
| LOC_Os09g25410.1 | expressed protein                                                                        | Chr9  | 15233373 | 15236004 + | 4  | 2122 | 5.65  |
| LOC_Os09g28890.1 | transposon protein, putative, CACTA, En/Spm sub-class, expressed                         | Chr9  | 17556929 | 17558591 + | 1  | 1695 | 6.60  |
| LOC_Os12g10540.5 | OsMADS13 - MADS-box family gene with MIKCC type-box, expressed                           | Chr12 | 5584790  | 5590285 +  | 9  | 1479 | 5.75  |
| LOC_Os03g04140.2 | serine acetyltransferase protein, putative, expressed                                    | Chr3  | 1892824  | 1897309 -  | 11 | 2156 | 5.47  |
| LOC_Os12g10540.4 | OsMADS13 - MADS-box family gene with MIKCC type-box, expressed                           | Chr12 | 5584775  | 5590285 +  | 8  | 1483 | 5.75  |
| LOC_Os06g05820.1 | OsLonP2 - Putative Lon protease homologue, expressed                                     | Chr6  | 2652069  | 2663464 +  | 15 | 4915 | 5.40  |
| LOC_Os07g20510.1 | auxin efflux carrier, putative, expressed                                                | Chr7  | 11845862 | 11851637 + | 8  | 4096 | 5.86  |
| LOC_Os02g54730.1 | transmembrane amino acid transporter protein, putative, expressed                        | Chr2  | 33511971 | 33517881 - | 12 | 2565 | 9.41  |
| LOC_Os04g44590.2 | expressed protein                                                                        | Chr4  | 26387544 | 26388693 + | 3  | 780  | 5.06  |
| LOC_Os02g39290.1 | TRAF-type zinc finger family protein, expressed                                          | Chr2  | 23726236 | 23729128 - | 3  | 1697 | 5.12  |
| LOC_Os04g23630.1 | expressed protein                                                                        | Chr4  | 13525940 | 13531038 + | 4  | 2578 | 4.88  |
| LOC_Os07g06670.1 | OsFBL35 - F-box domain and LRR containing protein, expressed                             | Chr7  | 3251100  | 3255281 +  | 6  | 1713 | 6.93  |
| LOC_Os01g72090.2 | phycoerythrobilin ferredoxin oxidoreductase, putative, expressed                         | Chr1  | 41822269 | 41825087 - | 7  | 1528 | 4.87  |
| LOC_Os11g11340.1 | CIP111, putative, expressed                                                              | Chr11 | 6288905  | 6295161 +  | 10 | 3733 | 6.54  |
| LOC_Os03g11450.1 | expressed protein                                                                        | Chr3  | 5900087  | 5902461 +  | 8  | 1320 | 5.03  |
| LOC_Os11g43934.2 | pentatricopeptide, putative, expressed                                                   | Chr11 | 26524908 | 26530976 - | 5  | 4526 | 5.35  |
| LOC_Os02g38690.1 | protein phosphatase 2C containing protein, expressed                                     | Chr2  | 23385364 | 23391840 + | 13 | 2708 | 7.11  |
| LOC_Os03g60530.1 | ras-related protein, putative, expressed                                                 | Chr3  | 34407093 | 34410746 + | 9  | 1682 | 5.09  |
| LOC_Os01g40120.1 | expressed protein                                                                        | Chr1  | 22632889 | 22637560 - | 7  | 1565 | 5.58  |
| LOC_Os03g18980.1 | kinesin motor domain containing protein, expressed                                       | Chr3  | 10630061 | 10635779 - | 19 | 3653 | 6.08  |

|                  |                                                                                           |       |          |            |    |      |       |
|------------------|-------------------------------------------------------------------------------------------|-------|----------|------------|----|------|-------|
| LOC_Os03g14520.1 | nucleotide-sensitive chloride conductance regulator containing protein, expressed         | Chr3  | 7881240  | 7884334 +  | 7  | 1540 | 5.36  |
| LOC_Os03g20300.3 | glucose-6-phosphate 1-dehydrogenase, chloroplast precursor, putative, expressed           | Chr3  | 11468496 | 11475783 - | 12 | 3849 | 6.32  |
| LOC_Os05g08410.2 | ATP10 protein, expressed                                                                  | Chr5  | 4585199  | 4588999 -  | 6  | 1394 | 5.48  |
| LOC_Os03g60530.3 | ras-related protein, putative, expressed                                                  | Chr3  | 34407093 | 34410746 + | 8  | 1795 | 5.09  |
| LOC_Os01g60910.1 | CAMK_KIN1/SNF1/Nim1_like.12 - CAMK includes calcium/calmodulin dependent protein kinases, | Chr1  | 35228867 | 35231733 + | 2  | 2455 | 5.73  |
| LOC_Os03g47949.1 | HECT-domain domain containing protein, expressed                                          | Chr3  | 27257668 | 27263489 - | 10 | 2166 | 6.80  |
| LOC_Os03g16870.1 | expressed protein                                                                         | Chr3  | 9373153  | 9375798 -  | 9  | 1858 | 5.70  |
| LOC_Os09g28890.2 | transposon protein, putative, CACTA, En/Spm sub-class, expressed                          | Chr9  | 17556974 | 17558591 + | 2  | 1592 | 6.30  |
| LOC_Os09g32090.1 | methyl-binding domain protein MBD, putative, expressed                                    | Chr9  | 19150469 | 19155796 - | 5  | 1932 | 5.08  |
| LOC_Os03g06860.1 | transposon protein, putative, unclassified, expressed                                     | Chr3  | 3471177  | 3473588 -  | 2  | 2391 | 6.19  |
| LOC_Os06g34120.1 | GDSL-like lipase/acylhydrolase, putative, expressed                                       | Chr6  | 19866070 | 19870006 - | 5  | 1740 | 5.31  |
| LOC_Os07g46220.1 | SNARE associated Golgi protein, putative, expressed                                       | Chr7  | 27579350 | 27584285 + | 9  | 1846 | 4.95  |
| LOC_Os01g38980.1 | calmodulin-binding protein, putative, expressed                                           | Chr1  | 21900050 | 21903309 - | 7  | 2608 | -7.30 |
| LOC_Os08g40140.1 | geranylgeranyl transferase type-2 subunit beta, putative, expressed                       | Chr8  | 25401248 | 25404642 + | 9  | 1684 | 5.64  |
| LOC_Os03g60100.1 | 50S ribosomal protein L17, putative, expressed                                            | Chr3  | 34174773 | 34176702 + | 3  | 1070 | 5.01  |
| LOC_Os03g03140.1 | RNA recognition motif containing protein, putative, expressed                             | Chr3  | 1322549  | 1324485 +  | 3  | 1357 | 6.10  |
| LOC_Os01g38980.2 | calmodulin-binding protein, putative, expressed                                           | Chr1  | 21900045 | 21903309 - | 7  | 2618 | -7.30 |
| LOC_Os01g62350.1 | 60S ribosomal protein L36-2, putative, expressed                                          | Chr1  | 36083051 | 36085662 - | 4  | 748  | 6.58  |
| LOC_Os06g07960.1 | cystathionine gamma-synthase, putative, expressed                                         | Chr6  | 3823413  | 3827346 +  | 11 | 1738 | 5.96  |
| LOC_Os01g58550.1 | methyladenine glycosylase, putative, expressed                                            | Chr1  | 33837388 | 33841176 + | 5  | 2424 | 8.28  |
| LOC_Os03g52284.1 | expressed protein                                                                         | Chr3  | 30026964 | 30028598 - | 3  | 435  | -6.69 |
| LOC_Os04g57520.1 | UBX domain-containing protein, putative, expressed                                        | Chr4  | 34215817 | 34222412 + | 10 | 2182 | 6.37  |
| LOC_Os09g30170.1 | F-box protein interaction domain containing protein, expressed                            | Chr9  | 18360671 | 18363993 + | 5  | 2148 | 5.45  |
| LOC_Os02g09810.2 | amino acid transporter, putative, expressed                                               | Chr2  | 5058716  | 5061965 -  | 6  | 2064 | -6.02 |
| LOC_Os02g09810.3 | amino acid transporter, putative, expressed                                               | Chr2  | 5058716  | 5061965 -  | 6  | 2064 | -6.02 |
| LOC_Os05g38580.2 | 50S ribosomal protein L17, putative, expressed                                            | Chr5  | 22630267 | 22632494 - | 6  | 938  | 4.76  |
| LOC_Os02g09810.1 | amino acid transporter, putative, expressed                                               | Chr2  | 5058716  | 5061962 -  | 6  | 2066 | -6.02 |
| LOC_Os01g24920.1 | poly synthetase 2-B, putative, expressed                                                  | Chr1  | 14031364 | 14038788 + | 13 | 1824 | 7.70  |
| LOC_Os08g40160.1 | thylakoid lumen protein, chloroplast precursor, putative, expressed                       | Chr8  | 25416106 | 25418793 + | 9  | 1541 | 4.49  |
| LOC_Os01g14514.1 | expressed protein                                                                         | Chr1  | 8130247  | 8131090 +  | 1  | 876  | 4.97  |
| LOC_Os08g12780.1 | chloroplast envelope membrane protein, putative, expressed                                | Chr8  | 7568532  | 7574295 -  | 10 | 2332 | 4.98  |
| LOC_Os05g34790.1 | GYF domain containing protein, putative, expressed                                        | Chr5  | 20644708 | 20648700 + | 7  | 968  | 6.04  |
| LOC_Os07g01150.3 | fatty acid hydroxylase, putative, expressed                                               | Chr7  | 88336    | 90761 +    | 8  | 1602 | 7.21  |
| LOC_Os04g52230.1 | ent-kaurene synthase, chloroplast precursor, putative, expressed                          | Chr4  | 31026617 | 31031248 + | 14 | 3373 | 6.09  |
| LOC_Os07g17130.1 | FYVE zinc finger domain containing protein, expressed                                     | Chr7  | 10064207 | 10068023 + | 5  | 2302 | 5.62  |
| LOC_Os08g32500.1 | nucleobase-ascorbate transporter, putative, expressed                                     | Chr8  | 20129190 | 20133667 + | 14 | 3267 | 4.88  |
| LOC_Os07g33270.1 | DUF584 domain containing protein, putative, expressed                                     | Chr7  | 19887177 | 19888285 - | 1  | 1141 | 4.40  |
| LOC_Os01g72090.1 | phycoerythrobilin ferredoxin oxidoreductase, putative, expressed                          | Chr1  | 41822269 | 41825087 - | 8  | 1475 | 4.86  |
| LOC_Os02g12480.8 | expressed protein                                                                         | Chr2  | 6508832  | 6513830 -  | 4  | 1434 | -3.68 |
| LOC_Os03g38990.1 | DNA-binding protein, putative, expressed                                                  | Chr3  | 21673710 | 21680377 + | 15 | 2975 | 5.34  |
| LOC_Os03g57330.3 | IQ calmodulin-binding motif domain containing protein, expressed                          | Chr3  | 32700604 | 32704373 - | 7  | 2197 | 6.92  |
| LOC_Os03g34040.3 | ribosomal protein, putative, expressed                                                    | Chr3  | 19412908 | 19417098 - | 3  | 1636 | 5.78  |
| LOC_Os09g29750.1 | ZOS9-15 - C2H2 zinc finger protein, expressed                                             | Chr9  | 18085524 | 18090864 - | 4  | 3820 | 4.53  |
| LOC_Os11g29490.3 | plasma membrane ATPase, putative, expressed                                               | Chr11 | 17108744 | 17115599 + | 13 | 3890 | 4.33  |
| LOC_Os01g14514.2 | expressed protein                                                                         | Chr1  | 8130247  | 8131022 +  | 2  | 736  | 4.87  |

|                  |                                                                                             |       |          |            |    |      |       |
|------------------|---------------------------------------------------------------------------------------------|-------|----------|------------|----|------|-------|
| LOC_Os08g06230.1 | nucleolar GTP-binding protein 1, putative, expressed                                        | Chr8  | 3431841  | 3438225 -  | 14 | 2431 | 5.01  |
| LOC_Os04g52340.1 | expressed protein                                                                           | Chr4  | 31098474 | 31103030 - | 11 | 2000 | 6.05  |
| LOC_Os10g13694.3 | expressed protein                                                                           | Chr10 | 7437013  | 7441835 +  | 2  | 1320 | 5.68  |
| LOC_Os04g59620.1 | SNF2 family N-terminal domain containing protein, expressed                                 | Chr4  | 35445920 | 35451211 - | 16 | 2878 | 6.07  |
| LOC_Os04g33450.2 | expressed protein                                                                           | Chr4  | 20221230 | 20223082 - | 4  | 1118 | -7.40 |
| LOC_Os12g04860.1 | DTW domain containing protein, putative, expressed                                          | Chr12 | 2087516  | 2090631 -  | 1  | 3148 | 7.08  |
| LOC_Os05g37700.2 | periplasmic beta-glucosidase precursor, putative, expressed                                 | Chr5  | 22068411 | 22072905 + | 8  | 3576 | 7.71  |
| LOC_Os06g44840.1 | prenyltransferase, putative, expressed                                                      | Chr6  | 27087455 | 27092919 + | 13 | 2196 | 7.69  |
| LOC_Os05g02420.2 | expressed protein                                                                           | Chr5  | 801087   | 803464 +   | 2  | 1664 | -4.86 |
| LOC_Os05g37700.1 | periplasmic beta-glucosidase precursor, putative, expressed                                 | Chr5  | 22068489 | 22072900 + | 8  | 3510 | 7.71  |
| LOC_Os02g51640.1 | expressed protein                                                                           | Chr2  | 31622776 | 31627571 - | 5  | 1922 | 5.87  |
| LOC_Os03g57170.2 | cell cycle control protein, putative, expressed                                             | Chr3  | 32599191 | 32602584 + | 10 | 1845 | 6.70  |
| LOC_Os11g07940.1 | expressed protein                                                                           | Chr11 | 4102967  | 4110192 +  | 9  | 2286 | 7.06  |
| LOC_Os01g20160.1 | OsHKT1%3B5 - Na%2B transporter, expressed                                                   | Chr1  | 11458955 | 11463442 - | 3  | 2260 | -7.27 |
| LOC_Os03g04140.1 | serine acetyltransferase protein, putative, expressed                                       | Chr3  | 1892824  | 1897309 -  | 10 | 2016 | 5.45  |
| LOC_Os03g26930.1 | OsSCP13 - Putative Serine Carboxypeptidase homologue, expressed                             | Chr3  | 15400415 | 15403844 + | 8  | 2076 | 4.80  |
| LOC_Os02g58120.1 | oxidoreductase/ transition metal ion binding protein, putative, expressed                   | Chr2  | 35567720 | 35570416 - | 8  | 1409 | 5.29  |
| LOC_Os05g43440.1 | single-stranded DNA-binding protein, putative, expressed                                    | Chr5  | 25254810 | 25259747 - | 8  | 1540 | 5.90  |
| LOC_Os03g41350.2 | BTBN7 - Bric-a-Brac, Tramtrack, Broad Complex BTB domain with non-phototropic hypocotyl 3 N | Chr3  | 22990165 | 22996334 - | 4  | 3561 | 7.01  |
| LOC_Os07g26750.1 | expressed protein                                                                           | Chr7  | 15451950 | 15452504 - | 1  | 587  | 4.54  |
| LOC_Os11g02460.1 | outer membrane protein, OMP85 family, putative, expressed                                   | Chr11 | 737421   | 742792 -   | 9  | 2733 | 4.58  |
| LOC_Os11g35060.1 | agenet domain containing protein, expressed                                                 | Chr11 | 20540287 | 20544620 + | 6  | 2580 | 6.23  |
| LOC_Os04g33450.1 | expressed protein                                                                           | Chr4  | 20221253 | 20223074 - | 3  | 1144 | -7.40 |
| LOC_Os03g57170.3 | cell cycle control protein, putative, expressed                                             | Chr3  | 32599191 | 32602584 + | 9  | 2299 | 6.90  |
| LOC_Os05g45900.1 | endonuclease/exonuclease/phosphatase family domain containing protein, expressed            | Chr5  | 26596142 | 26601273 - | 10 | 2697 | 4.20  |
| LOC_Os06g19095.1 | expressed protein                                                                           | Chr6  | 10865395 | 10867828 - | 2  | 1300 | -6.16 |
| LOC_Os08g36150.2 | activator of 90 kDa heat shock protein ATPase homolog, putative, expressed                  | Chr8  | 22777103 | 22781160 - | 2  | 4028 | 6.56  |
| LOC_Os06g40750.1 | expressed protein                                                                           | Chr6  | 24293278 | 24295704 + | 3  | 987  | 5.03  |
| LOC_Os12g34100.1 | expressed protein                                                                           | Chr12 | 20641716 | 20644530 - | 1  | 2847 | 4.79  |
| LOC_Os03g57170.1 | cell cycle control protein, putative, expressed                                             | Chr3  | 32599191 | 32602584 + | 8  | 2399 | 6.95  |
| LOC_Os06g43270.1 | protein kinase domain containing protein, expressed                                         | Chr6  | 26003181 | 26007060 + | 5  | 2673 | 7.13  |
| LOC_Os06g23800.2 | flavin-containing monooxygenase family protein, putative, expressed                         | Chr6  | 13905082 | 13909018 - | 7  | 1434 | 5.08  |
| LOC_Os08g06460.1 | dnaJ domain containing protein, expressed                                                   | Chr8  | 3622704  | 3624999 -  | 3  | 1788 | 7.37  |
| LOC_Os05g43380.1 | tesmin/TSO1-like CXC domain containing protein, expressed                                   | Chr5  | 25224822 | 25227403 - | 6  | 1668 | 4.59  |
| LOC_Os01g39100.1 | zinc finger C-x8-C-x5-C-x3-H type family protein, expressed                                 | Chr1  | 21973687 | 21980482 + | 12 | 2739 | 8.76  |
| LOC_Os11g02460.2 | outer membrane protein, OMP85 family, putative, expressed                                   | Chr11 | 737419   | 742792 -   | 9  | 2787 | 4.58  |
| LOC_Os04g58970.1 | uncharacterized ACR, YggU family COG1872 containing protein, expressed                      | Chr4  | 35084308 | 35086276 - | 3  | 704  | 5.13  |
| LOC_Os03g21270.3 | expressed protein                                                                           | Chr3  | 12151051 | 12157603 - | 5  | 2562 | 5.84  |
| LOC_Os05g45710.1 | serine acetyltransferase protein, putative, expressed                                       | Chr5  | 26480056 | 26481404 - | 1  | 1381 | 7.53  |
| LOC_Os05g43380.2 | tesmin/TSO1-like CXC domain containing protein, expressed                                   | Chr5  | 25224822 | 25227403 - | 5  | 1767 | 4.59  |
| LOC_Os02g50070.1 | expressed protein                                                                           | Chr2  | 30583327 | 30584031 + | 2  | 505  | 4.75  |
| LOC_Os03g43910.1 | expressed protein                                                                           | Chr3  | 24638171 | 24641470 - | 3  | 838  | 5.71  |
| LOC_Os03g27003.1 | expressed protein                                                                           | Chr3  | 15453264 | 15457612 + | 3  | 2532 | 5.25  |
| LOC_Os08g06460.2 | dnaJ domain containing protein, expressed                                                   | Chr8  | 3622716  | 3624996 -  | 3  | 1792 | 7.38  |
| LOC_Os02g19440.3 | sirohochlorin ferrochelatase, putative, expressed                                           | Chr2  | 11353283 | 11357740 - | 6  | 1617 | 4.99  |

|                  |                                                                         |       |          |            |    |      |        |
|------------------|-------------------------------------------------------------------------|-------|----------|------------|----|------|--------|
| LOC_Os07g01150.2 | fatty acid hydroxylase, putative, expressed                             | Chr7  | 88336    | 90761 +    | 7  | 1643 | 7.23   |
| LOC_Os12g01240.1 | mitochondrial substrate carrier family protein, putative, expressed     | Chr12 | 136205   | 141120 -   | 7  | 2801 | 6.38   |
| LOC_Os04g43670.1 | expressed protein                                                       | Chr4  | 25835625 | 25837777 + | 2  | 1027 | 8.56   |
| LOC_Os07g44040.1 | ras-related protein, putative, expressed                                | Chr7  | 26321207 | 26324254 + | 4  | 1658 | 5.98   |
| LOC_Os02g13640.1 | protein phosphatase 1 regulatory subunit SDS22, putative, expressed     | Chr2  | 7316388  | 7319489 +  | 6  | 1837 | 5.13   |
| LOC_Os02g43370.2 | transposon protein, putative, unclassified, expressed                   | Chr2  | 26170387 | 26174970 - | 8  | 2639 | 7.20   |
| LOC_Os03g18220.2 | pyruvate decarboxylase isozyme 2, putative, expressed                   | Chr3  | 10217802 | 10220748 - | 5  | 2445 | 7.58   |
| LOC_Os03g55270.1 | TIP41, putative, expressed                                              | Chr3  | 31454981 | 31458898 - | 8  | 2334 | 5.43   |
| LOC_Os06g16400.3 | helix-loop-helix DNA-binding domain containing protein, expressed       | Chr6  | 9365581  | 9368004 +  | 4  | 2301 | 6.92   |
| LOC_Os11g13990.1 | AAA-type ATPase family protein, putative, expressed                     | Chr11 | 7753325  | 7762397 -  | 9  | 3892 | 6.55   |
| LOC_Os12g44160.3 | oxidoreductase, putative, expressed                                     | Chr12 | 27394751 | 27398395 + | 12 | 1555 | 6.42   |
| LOC_Os03g08770.2 | modifier of rudimentary protein, expressed                              | Chr3  | 4532886  | 4536625 +  | 8  | 1479 | 4.38   |
| LOC_Os03g08770.1 | modifier of rudimentary protein, expressed                              | Chr3  | 4532886  | 4536625 +  | 8  | 1482 | 4.38   |
| LOC_Os03g61030.1 | transcription termination factor nusG family protein, expressed         | Chr3  | 34671286 | 34674494 + | 6  | 1591 | 5.19   |
| LOC_Os03g57130.1 | expressed protein                                                       | Chr3  | 32570053 | 32576114 - | 9  | 1686 | 5.51   |
| LOC_Os01g68104.1 | ZOS1-21 - C2H2 zinc finger protein, expressed                           | Chr1  | 39588269 | 39591239 + | 9  | 1557 | 5.22   |
| LOC_Os12g44160.2 | oxidoreductase, putative, expressed                                     | Chr12 | 27394751 | 27398395 + | 12 | 1566 | 6.42   |
| LOC_Os08g02380.1 | kinesin motor domain containing protein, putative, expressed            | Chr8  | 948033   | 952596 +   | 17 | 2537 | 6.92   |
| LOC_Os01g61150.1 | phox domain-containing protein, putative, expressed                     | Chr1  | 35396166 | 35400248 - | 5  | 2286 | 4.79   |
| LOC_Os02g09380.1 | expressed protein                                                       | Chr2  | 4820464  | 4822685 +  | 5  | 1323 | 4.91   |
| LOC_Os08g38010.2 | expressed protein                                                       | Chr8  | 24079677 | 24082211 + | 5  | 933  | 4.65   |
| LOC_Os08g38010.1 | expressed protein                                                       | Chr8  | 24079677 | 24082211 + | 5  | 939  | 4.65   |
| LOC_Os05g16920.1 | SHR5-receptor-like kinase, putative, expressed                          | Chr5  | 9643930  | 9644716 +  | 3  | 522  | -10.24 |
| LOC_Os09g25410.2 | expressed protein                                                       | Chr9  | 15233373 | 15236004 + | 3  | 2477 | 5.65   |
| LOC_Os09g36830.1 | Skp1 family, dimerisation domain containing protein, expressed          | Chr9  | 21243189 | 21245828 - | 2  | 937  | 4.91   |
| LOC_Os09g27990.1 | annexin, putative, expressed                                            | Chr9  | 16999259 | 17001374 - | 5  | 1853 | 6.47   |
| LOC_Os01g46840.1 | expressed protein                                                       | Chr1  | 26717834 | 26722446 + | 2  | 2949 | 6.15   |
| LOC_Os05g48200.1 | glutamate synthase, chloroplast precursor, putative, expressed          | Chr5  | 27622654 | 27636451 + | 22 | 7630 | 6.76   |
| LOC_Os08g12780.4 | chloroplast envelope membrane protein, putative, expressed              | Chr8  | 7568532  | 7573950 -  | 9  | 2506 | 4.99   |
| LOC_Os03g58610.1 | expressed protein                                                       | Chr3  | 33384953 | 33387239 - | 2  | 2124 | 5.45   |
| LOC_Os06g48960.1 | ALG2-like family domain containing protein, expressed                   | Chr6  | 29665219 | 29667372 - | 5  | 1154 | 5.97   |
| LOC_Os06g34650.1 | zinc finger, C3HC4 type domain containing protein, expressed            | Chr6  | 20143793 | 20144666 + | 1  | 906  | 4.83   |
| LOC_Os03g11990.3 | boIA, putative, expressed                                               | Chr3  | 6282856  | 6284385 +  | 2  | 811  | 4.59   |
| LOC_Os12g16290.1 | isoflavone reductase, putative, expressed                               | Chr12 | 9315228  | 9318123 -  | 1  | 2928 | -8.85  |
| LOC_Os05g44800.3 | expressed protein                                                       | Chr5  | 26049874 | 26052703 + | 5  | 849  | 4.96   |
| LOC_Os05g30210.1 | expressed protein                                                       | Chr5  | 17506661 | 17510762 + | 6  | 2616 | 6.60   |
| LOC_Os03g11990.1 | boIA, putative, expressed                                               | Chr3  | 6282854  | 6284385 +  | 2  | 819  | 4.59   |
| LOC_Os08g37780.2 | NOL1/NOP2/sun family protein, putative, expressed                       | Chr8  | 23926908 | 23934321 - | 15 | 3256 | 6.07   |
| LOC_Os08g02380.2 | kinesin motor domain containing protein, putative, expressed            | Chr8  | 948033   | 952596 +   | 17 | 2488 | 6.92   |
| LOC_Os03g18220.1 | pyruvate decarboxylase isozyme 2, putative, expressed                   | Chr3  | 10217796 | 10220748 - | 6  | 2374 | 7.58   |
| LOC_Os05g03200.1 | expressed protein                                                       | Chr5  | 1295616  | 1298612 -  | 7  | 1600 | 5.08   |
| LOC_Os11g01594.1 | expressed protein                                                       | Chr11 | 345960   | 347658 -   | 3  | 968  | 6.16   |
| LOC_Os01g62860.1 | oxidoreductase, aldo/keto reductase family protein, putative, expressed | Chr1  | 36403442 | 36407380 + | 7  | 1604 | 5.37   |
| LOC_Os12g37850.1 | expressed protein                                                       | Chr12 | 23256397 | 23258478 - | 5  | 589  | 4.34   |
| LOC_Os05g38580.1 | 50S ribosomal protein L17, putative, expressed                          | Chr5  | 22630314 | 22632494 - | 7  | 976  | 4.70   |

|                  |                                                                                 |       |          |            |    |      |      |
|------------------|---------------------------------------------------------------------------------|-------|----------|------------|----|------|------|
| LOC_Os04g42134.1 | enhancer of rudimentary protein, putative, expressed                            | Chr4  | 24943121 | 24945222 - | 3  | 1556 | 5.74 |
| LOC_Os03g28310.1 | dnaJ domain containing protein, expressed                                       | Chr3  | 16293645 | 16297124 - | 2  | 3132 | 5.42 |
| LOC_Os03g17760.1 | RNA recognition motif containing protein, putative, expressed                   | Chr3  | 9878025  | 9880930 -  | 6  | 1788 | 5.61 |
| LOC_Os10g25310.1 | SPX domain containing protein, putative, expressed                              | Chr10 | 13088805 | 13091555 + | 3  | 1688 | 5.71 |
| LOC_Os08g37780.1 | NOL1/NOP2/sun family protein, putative, expressed                               | Chr8  | 23926908 | 23934321 - | 15 | 3261 | 6.07 |
| LOC_Os12g30510.3 | DNA-directed RNA polymerase III subunit RPC9, putative, expressed               | Chr12 | 18312051 | 18313102 - | 3  | 628  | 4.36 |
| LOC_Os09g33920.2 | expressed protein                                                               | Chr9  | 20019441 | 20023423 + | 8  | 1819 | 6.23 |
| LOC_Os01g17070.1 | OsDegp1 - Putative Deg protease homologue, expressed                            | Chr1  | 9816783  | 9822750 +  | 11 | 2225 | 7.24 |
| LOC_Os03g11140.2 | pleckstrin homology domain-containing protein-related taxo, putative, expressed | Chr3  | 5735001  | 5746233 +  | 27 | 4265 | 6.48 |
| LOC_Os07g48880.3 | importin subunit alpha-1b, putative, expressed                                  | Chr7  | 29247384 | 29251970 - | 11 | 3256 | 5.04 |
| LOC_Os05g49910.1 | expressed protein                                                               | Chr5  | 28628860 | 28632192 - | 8  | 1758 | 5.38 |
| LOC_Os12g02120.1 | dual specificity protein phosphatase, putative, expressed                       | Chr12 | 639746   | 643600 -   | 4  | 1881 | 5.46 |
| LOC_Os03g57330.1 | IQ calmodulin-binding motif domain containing protein, expressed                | Chr3  | 32700604 | 32704499 - | 7  | 2287 | 6.90 |
| LOC_Os01g17070.2 | OsDegp1 - Putative Deg protease homologue, expressed                            | Chr1  | 9816783  | 9822736 +  | 10 | 2484 | 7.57 |
| LOC_Os04g43922.1 | exosome complex exonuclease rrp4, putative, expressed                           | Chr4  | 26036773 | 26041443 - | 7  | 1710 | 6.37 |
| LOC_Os11g34770.1 | maf, putative, expressed                                                        | Chr11 | 20372742 | 20376132 - | 9  | 1314 | 6.80 |
| LOC_Os07g48880.4 | importin subunit alpha-1b, putative, expressed                                  | Chr7  | 29247384 | 29251970 - | 11 | 3238 | 5.04 |
| LOC_Os01g58550.2 | methyladenine glycosylase, putative, expressed                                  | Chr1  | 33837388 | 33838996 + | 4  | 1448 | 5.90 |
| LOC_Os04g47130.1 | expressed protein                                                               | Chr4  | 27990856 | 27992387 - | 2  | 959  | 4.41 |
| LOC_Os05g39080.1 | protein kinase family protein, putative, expressed                              | Chr5  | 22910888 | 22915683 - | 8  | 2765 | 6.03 |
| LOC_Os07g48880.1 | importin subunit alpha-1b, putative, expressed                                  | Chr7  | 29247384 | 29251970 - | 11 | 3222 | 5.04 |
| LOC_Os11g17600.3 | roothairless 1, putative, expressed                                             | Chr11 | 9794908  | 9810038 +  | 26 | 3880 | 7.06 |
| LOC_Os03g44760.3 | SW11, putative, expressed                                                       | Chr3  | 25235419 | 25240157 + | 9  | 3547 | 6.15 |
| LOC_Os05g49910.3 | expressed protein                                                               | Chr5  | 28628860 | 28632174 - | 7  | 1790 | 5.38 |
| LOC_Os05g32120.1 | alpha 1,3-xylosyltransferase, putative, expressed                               | Chr5  | 18728868 | 18731335 + | 4  | 1187 | 4.82 |
| LOC_Os03g21730.1 | receptor-like protein kinase precursor, putative, expressed                     | Chr3  | 12411275 | 12415224 + | 3  | 3757 | 5.04 |
| LOC_Os03g11140.1 | pleckstrin homology domain-containing protein-related taxo, putative, expressed | Chr3  | 5735003  | 5746233 +  | 27 | 4291 | 6.48 |
| LOC_Os06g46540.1 | cell division cycle protein 23, putative, expressed                             | Chr6  | 28256523 | 28260340 + | 6  | 2092 | 5.35 |
| LOC_Os01g13660.1 | expressed protein                                                               | Chr1  | 7652869  | 7656854 -  | 2  | 1153 | 4.85 |
| LOC_Os07g01150.1 | fatty acid hydroxylase, putative, expressed                                     | Chr7  | 88336    | 90761 +    | 6  | 1699 | 7.26 |
| LOC_Os03g11140.3 | pleckstrin homology domain-containing protein-related taxo, putative, expressed | Chr3  | 5735003  | 5746233 +  | 27 | 4299 | 6.48 |
| LOC_Os05g28950.1 | CAAX amino terminal protease family protein, putative, expressed                | Chr5  | 16972939 | 16975972 + | 8  | 1676 | 4.93 |
| LOC_Os08g19540.1 | retrotransposon protein, putative, unclassified, expressed                      | Chr8  | 11682363 | 11686428 - | 3  | 3993 | 4.75 |
| LOC_Os04g39540.1 | expressed protein                                                               | Chr4  | 23543942 | 23546897 - | 3  | 1517 | 6.09 |
| LOC_Os01g37870.4 | PPR repeat domain containing protein, putative, expressed                       | Chr1  | 21195398 | 21202961 + | 11 | 2990 | 4.93 |
| LOC_Os07g46430.1 | expressed protein                                                               | Chr7  | 27701580 | 27705190 - | 7  | 1674 | 5.71 |
| LOC_Os12g26030.1 | FACT complex subunit SPT16, putative, expressed                                 | Chr12 | 15121175 | 15124607 + | 1  | 3465 | 6.54 |
| LOC_Os04g53612.1 | APO, putative, expressed                                                        | Chr4  | 31959526 | 31961876 - | 3  | 1934 | 4.86 |
| LOC_Os06g49510.1 | zinc knuckle family protein, putative, expressed                                | Chr6  | 29989930 | 29994451 - | 6  | 2455 | 5.69 |
| LOC_Os04g52100.1 | peptidase, M24 family protein, putative, expressed                              | Chr4  | 30945118 | 30948691 - | 10 | 1756 | 5.53 |
| LOC_Os09g30170.3 | F-box protein interaction domain containing protein, expressed                  | Chr9  | 18360671 | 18364013 + | 4  | 2373 | 6.03 |
| LOC_Os11g17600.1 | roothairless 1, putative, expressed                                             | Chr11 | 9794908  | 9807645 +  | 25 | 4007 | 7.05 |
| LOC_Os11g29490.1 | plasma membrane ATPase, putative, expressed                                     | Chr11 | 17108744 | 17114115 + | 13 | 3671 | 4.82 |
| LOC_Os11g29490.2 | plasma membrane ATPase, putative, expressed                                     | Chr11 | 17108744 | 17114115 + | 12 | 3708 | 4.82 |
| LOC_Os05g28950.3 | CAAX amino terminal protease family protein, putative, expressed                | Chr5  | 16972939 | 16975972 + | 8  | 1753 | 4.93 |

|                  |                                                                                     |       |          |            |    |      |       |
|------------------|-------------------------------------------------------------------------------------|-------|----------|------------|----|------|-------|
| LOC_Os04g57739.2 | expressed protein                                                                   | Chr4  | 34393144 | 34396566 + | 3  | 1703 | 6.58  |
| LOC_Os03g53140.2 | protein transport protein Sec23B, putative, expressed                               | Chr3  | 30476518 | 30480167 + | 2  | 2869 | 5.68  |
| LOC_Os03g38580.1 | pentatricopeptide, putative, expressed                                              | Chr3  | 21409003 | 21411259 - | 1  | 2289 | 7.40  |
| LOC_Os08g32440.1 | transposon protein, putative, unclassified, expressed                               | Chr8  | 20087415 | 20090865 + | 6  | 2305 | 4.87  |
| LOC_Os04g49440.3 | RNA recognition motif containing protein, putative, expressed                       | Chr4  | 29499367 | 29501790 + | 6  | 1197 | 5.84  |
| LOC_Os04g56320.1 | AAA-type ATPase family protein, putative, expressed                                 | Chr4  | 33575152 | 33579655 - | 11 | 2042 | 6.47  |
| LOC_Os01g65210.1 | proton-dependent oligopeptide transport, putative, expressed                        | Chr1  | 37837137 | 37843664 + | 8  | 2467 | 5.10  |
| LOC_Os04g33450.3 | expressed protein                                                                   | Chr4  | 20221230 | 20223074 - | 3  | 1323 | -7.40 |
| LOC_Os09g30170.2 | F-box protein interaction domain containing protein, expressed                      | Chr9  | 18360671 | 18364013 + | 3  | 2843 | 6.15  |
| LOC_Os08g14570.1 | NADPH reductase, putative, expressed                                                | Chr8  | 8760073  | 8765208 +  | 17 | 3197 | -8.09 |
| LOC_Os01g37870.1 | PPR repeat domain containing protein, putative, expressed                           | Chr1  | 21195432 | 21202961 + | 12 | 2898 | 4.93  |
| LOC_Os05g49910.2 | expressed protein                                                                   | Chr5  | 28628860 | 28632172 - | 5  | 1908 | 5.38  |
| LOC_Os03g11140.4 | pleckstrin homology domain-containing protein-related taxo, putative, expressed     | Chr3  | 5735003  | 5746233 +  | 26 | 4370 | 6.48  |
| LOC_Os05g34780.1 | retrotransposon protein, putative, Ty3-gypsy subclass, expressed                    | Chr5  | 20636382 | 20643355 + | 5  | 2221 | 6.42  |
| LOC_Os04g36810.1 | LSM domain containing protein, expressed                                            | Chr4  | 22223723 | 22227217 + | 5  | 1171 | 6.32  |
| LOC_Os09g03210.1 | expressed protein                                                                   | Chr9  | 1546433  | 1549533 +  | 3  | 1376 | 6.32  |
| LOC_Os03g02590.4 | peroxisomal biogenesis factor 11, putative, expressed                               | Chr3  | 956806   | 960245 -   | 7  | 3020 | 6.29  |
| LOC_Os03g11480.1 | expressed protein                                                                   | Chr3  | 5941787  | 5944063 +  | 2  | 1580 | 6.98  |
| LOC_Os01g10504.2 | OsMADS3 - MADS-box family gene with MIKCC type-box, expressed                       | Chr1  | 5559548  | 5568844 -  | 10 | 1754 | 5.32  |
| LOC_Os01g70730.1 | flowering promoting factor-like 1, putative, expressed                              | Chr1  | 40942204 | 40943109 - | 1  | 938  | 6.19  |
| LOC_Os01g53450.1 | aminotransferase, classes I and II, domain containing protein, expressed            | Chr1  | 30714010 | 30717688 + | 11 | 2053 | 4.37  |
| LOC_Os01g05130.1 | expressed protein                                                                   | Chr1  | 2403270  | 2405982 +  | 5  | 1187 | 4.20  |
| LOC_Os03g27350.1 | cysteine protease ATG4, putative, expressed                                         | Chr3  | 15661856 | 15665667 + | 8  | 2359 | 4.64  |
| LOC_Os09g13740.1 | SET domain containing protein, expressed                                            | Chr9  | 8039176  | 8046950 -  | 12 | 2112 | 5.48  |
| LOC_Os03g17690.2 | OsAPx1 - Cytosolic Ascorbate Peroxidase encoding gene 1-8, expressed                | Chr3  | 9843327  | 9846747 +  | 8  | 1510 | 5.72  |
| LOC_Os03g44840.2 | choline transporter-related, putative, expressed                                    | Chr3  | 25298624 | 25301880 - | 2  | 1601 | 5.61  |
| LOC_Os03g51270.1 | OsFBX108 - F-box domain containing protein, expressed                               | Chr3  | 29328821 | 29336560 - | 7  | 3409 | 6.02  |
| LOC_Os03g19270.3 | universal stress protein domain containing protein, putative, expressed             | Chr3  | 10839450 | 10840785 - | 4  | 1137 | 7.32  |
| LOC_Os03g19270.2 | universal stress protein domain containing protein, putative, expressed             | Chr3  | 10839450 | 10840785 - | 4  | 1146 | 7.32  |
| LOC_Os12g31410.1 | expressed protein                                                                   | Chr12 | 18893310 | 18895347 - | 2  | 760  | 4.92  |
| LOC_Os05g04510.1 | S-adenosylmethionine synthetase, putative, expressed                                | Chr5  | 2089032  | 2092342 +  | 2  | 2050 | -5.53 |
| LOC_Os12g44160.1 | oxidoreductase, putative, expressed                                                 | Chr12 | 27394407 | 27398395 + | 13 | 1824 | 6.42  |
| LOC_Os03g45750.1 | DUF260 domain containing protein, putative, expressed                               | Chr3  | 25843447 | 25846110 + | 2  | 1327 | 6.08  |
| LOC_Os03g19270.1 | universal stress protein domain containing protein, putative, expressed             | Chr3  | 10839437 | 10840785 + | 4  | 1186 | 7.32  |
| LOC_Os05g49430.1 | aldose 1-epimerase, putative, expressed                                             | Chr5  | 28342175 | 28345123 + | 8  | 2031 | 7.17  |
| LOC_Os11g16320.1 | expressed protein                                                                   | Chr11 | 9000482  | 9004994 +  | 8  | 1596 | 5.13  |
| LOC_Os03g49380.1 | lipoxygenase, putative, expressed                                                   | Chr3  | 28106903 | 28113300 + | 9  | 3467 | -7.72 |
| LOC_Os02g39650.1 | expressed protein                                                                   | Chr2  | 23943695 | 23946512 - | 7  | 1108 | 5.02  |
| LOC_Os06g48650.3 | OsSub52 - Putative Subtilisin homologue, expressed                                  | Chr6  | 29434401 | 29441099 + | 10 | 3128 | 4.72  |
| LOC_Os05g44800.1 | expressed protein                                                                   | Chr5  | 26049874 | 26050504 + | 1  | 663  | 4.48  |
| LOC_Os03g49140.1 | ABC1 protein At2g40090 precursor, putative, expressed                               | Chr3  | 27989293 | 27991227 - | 3  | 1018 | 4.64  |
| LOC_Os01g59860.1 | expressed protein                                                                   | Chr1  | 34620233 | 34623931 + | 6  | 2114 | 5.42  |
| LOC_Os06g48650.2 | OsSub52 - Putative Subtilisin homologue, expressed                                  | Chr6  | 29435100 | 29441099 + | 10 | 3440 | 5.01  |
| LOC_Os02g26440.1 | prefoldin subunit, putative, expressed                                              | Chr2  | 15524119 | 15528164 + | 5  | 1242 | 4.75  |
| LOC_Os04g55970.1 | AP2-like ethylene-responsive transcription factor AINTEGUMENTA, putative, expressed | Chr4  | 33341978 | 33346562 + | 8  | 2440 | 7.28  |

|                  |                                                                                               |       |          |            |    |      |       |
|------------------|-----------------------------------------------------------------------------------------------|-------|----------|------------|----|------|-------|
| LOC_Os03g19270.4 | universal stress protein domain containing protein, putative, expressed                       | Chr3  | 10839453 | 10840785 - | 3  | 1248 | 7.32  |
| LOC_Os07g30240.1 | mutS family domain IV containing protein, expressed                                           | Chr7  | 17870625 | 17880163 + | 19 | 2585 | 6.07  |
| LOC_Os03g27350.2 | cysteine protease ATG4, putative, expressed                                                   | Chr3  | 15661851 | 15665670 + | 9  | 2306 | 4.64  |
| LOC_Os04g55970.2 | AP2-like ethylene-responsive transcription factor AINTEGUMENTA, putative, expressed           | Chr4  | 33341978 | 33346562 + | 8  | 2433 | 7.28  |
| LOC_Os01g07780.1 | embryo-specific 3, putative, expressed                                                        | Chr1  | 3735829  | 3736828 +  | 1  | 1032 | 5.02  |
| LOC_Os02g17700.1 | pyridine nucleotide-disulphide oxidoreductase domain containing protein, expressed            | Chr2  | 10207339 | 10212956 + | 13 | 2351 | 5.25  |
| LOC_Os08g37270.1 | heat shock protein DnaJ, putative, expressed                                                  | Chr8  | 23557556 | 23559107 + | 1  | 1584 | 4.25  |
| LOC_Os06g03570.1 | pentatricopeptide, putative, expressed                                                        | Chr6  | 1377416  | 1379454 +  | 2  | 1877 | 5.38  |
| LOC_Os01g56510.2 | periplasmic beta-glucosidase precursor, putative, expressed                                   | Chr1  | 32580710 | 32586143 - | 12 | 3059 | 5.46  |
| LOC_Os06g03570.2 | pentatricopeptide, putative, expressed                                                        | Chr6  | 1377416  | 1379454 +  | 2  | 1884 | 5.38  |
| LOC_Os03g29184.1 | expressed protein                                                                             | Chr3  | 16586519 | 16587292 - | 1  | 806  | 5.08  |
| LOC_Os07g27480.1 | ELMO/CED-12 family protein, putative, expressed                                               | Chr7  | 16013083 | 16022630 - | 13 | 2708 | 4.16  |
| LOC_Os01g46570.1 | CTP synthase, putative, expressed                                                             | Chr1  | 26514543 | 26521761 + | 21 | 3121 | 5.82  |
| LOC_Os01g64670.3 | soluble inorganic pyrophosphatase, putative, expressed                                        | Chr1  | 37521803 | 37524040 - | 7  | 1865 | 5.26  |
| LOC_Os05g38880.1 | expressed protein                                                                             | Chr5  | 22807363 | 22807937 - | 1  | 607  | 6.27  |
| LOC_Os01g04720.1 | leucine-rich repeat protein-related, putative, expressed                                      | Chr1  | 2130798  | 2137310 +  | 9  | 3437 | 5.99  |
| LOC_Os01g68240.1 | expressed protein                                                                             | Chr1  | 39657943 | 39660633 + | 3  | 546  | 4.31  |
| LOC_Os04g20590.1 | YL1 nuclear protein C-terminal domain containing protein, expressed                           | Chr4  | 11510705 | 11515835 - | 3  | 1024 | 4.21  |
| LOC_Os12g38720.1 | expressed protein                                                                             | Chr12 | 23782739 | 23783531 - | 1  | 825  | -4.70 |
| LOC_Os01g34610.2 | expressed protein                                                                             | Chr1  | 19079248 | 19082074 + | 4  | 1419 | 4.53  |
| LOC_Os09g38772.1 | MOSC domain-containing protein, mitochondrial precursor, putative, expressed                  | Chr9  | 22278292 | 22281049 + | 8  | 1544 | 4.92  |
| LOC_Os01g56510.5 | periplasmic beta-glucosidase precursor, putative, expressed                                   | Chr1  | 32580710 | 32586143 - | 11 | 2936 | 5.45  |
| LOC_Os06g06720.1 | flavonol synthase/flavanone 3-hydroxylase, putative, expressed                                | Chr6  | 3145466  | 3147618 +  | 3  | 1388 | 4.81  |
| LOC_Os01g56510.3 | periplasmic beta-glucosidase precursor, putative, expressed                                   | Chr1  | 32580710 | 32586143 - | 11 | 2926 | 5.45  |
| LOC_Os03g30519.2 | expressed protein                                                                             | Chr3  | 17409991 | 17412954 - | 3  | 1718 | 5.06  |
| LOC_Os01g55310.1 | haloacid dehalogenase-like hydrolase domain-containing protein 1A, putative, expressed        | Chr1  | 31836495 | 31839636 - | 9  | 1293 | 6.29  |
| LOC_Os01g56510.4 | periplasmic beta-glucosidase precursor, putative, expressed                                   | Chr1  | 32580710 | 32586143 - | 11 | 2890 | 5.45  |
| LOC_Os04g35540.1 | amino acid permease family protein, putative, expressed                                       | Chr4  | 21637782 | 21642647 + | 6  | 2259 | 5.32  |
| LOC_Os03g27350.3 | cysteine protease ATG4, putative, expressed                                                   | Chr3  | 15661851 | 15665670 + | 10 | 2256 | 4.64  |
| LOC_Os02g12730.2 | beta-galactosidase precursor, putative, expressed                                             | Chr2  | 6656719  | 6660624 -  | 16 | 2831 | 4.72  |
| LOC_Os08g32180.1 | retrotransposon protein, putative, unclassified, expressed                                    | Chr8  | 19958778 | 19960391 + | 1  | 1646 | -5.06 |
| LOC_Os07g15600.1 | H-BTB6 - Bric-a-Brac, Tramtrack, Broad Complex BTB domain with H family conserved sequence,   | Chr7  | 9035960  | 9039225 -  | 2  | 2214 | 8.08  |
| LOC_Os12g43130.1 | phytoene synthase, chloroplast precursor, putative, expressed                                 | Chr12 | 26780487 | 26783598 - | 6  | 1710 | 5.32  |
| LOC_Os06g07190.1 | RNA polymerase Rpb7, N-terminal domain containing protein, expressed                          | Chr6  | 3440104  | 3443076 +  | 5  | 1893 | 5.46  |
| LOC_Os10g30190.1 | BTBP2 - Bric-a-Brac, Tramtrack, Broad Complex BTB domain with pentapeptide repeats, expressed | Chr10 | 15689665 | 15693104 - | 11 | 1974 | 5.58  |
| LOC_Os03g26450.1 | F-actin-capping protein subunit beta, putative, expressed                                     | Chr3  | 15115090 | 15118345 + | 8  | 1509 | 4.94  |
| LOC_Os05g43440.2 | single-stranded DNA-binding protein, putative, expressed                                      | Chr5  | 25257151 | 25259747 - | 7  | 1315 | 5.80  |
| LOC_Os02g26614.1 | retrotransposon protein, putative, unclassified, expressed                                    | Chr2  | 15621008 | 15629984 + | 12 | 3381 | 4.49  |
| LOC_Os02g46510.1 | adaptor complexes medium subunit family domain containing protein, expressed                  | Chr2  | 28355531 | 28360589 + | 13 | 2444 | 5.51  |
| LOC_Os09g33740.1 | Zinc finger, ZZ type domain containing protein, expressed                                     | Chr9  | 19922090 | 19931713 + | 12 | 2115 | 4.95  |
| LOC_Os04g33330.1 | expressed protein                                                                             | Chr4  | 20187930 | 20189402 - | 3  | 853  | 5.37  |
| LOC_Os05g23840.1 | expressed protein                                                                             | Chr5  | 13702736 | 13706423 + | 2  | 2538 | 4.49  |
| LOC_Os05g46570.1 | WD domain, G-beta repeat domain containing protein, expressed                                 | Chr5  | 26962970 | 26965906 + | 9  | 1651 | 5.23  |
| LOC_Os10g36250.1 | tetratricopeptide repeat, putative, expressed                                                 | Chr10 | 19374119 | 19379513 - | 15 | 3205 | 5.13  |
| LOC_Os10g35730.1 | pentatricopeptide repeat domain containing protein, putative, expressed                       | Chr10 | 19104084 | 19105750 + | 2  | 1623 | 4.93  |

|                  |                                                                                               |       |          |            |    |      |       |
|------------------|-----------------------------------------------------------------------------------------------|-------|----------|------------|----|------|-------|
| LOC_Os01g51040.1 | transmembrane protein 16K, putative, expressed                                                | Chr1  | 29318192 | 29322569 - | 16 | 2951 | 7.13  |
| LOC_Os11g31110.1 | expressed protein                                                                             | Chr11 | 18106956 | 18113191 - | 8  | 2401 | 5.69  |
| LOC_Os10g12620.1 | protein kinase domain containing protein, expressed                                           | Chr10 | 7022929  | 7031173 -  | 9  | 3708 | 6.45  |
| LOC_Os12g34510.1 | Core histone H2A/H2B/H3/H4 domain containing protein, putative, expressed                     | Chr12 | 20888185 | 20889121 - | 2  | 903  | 4.30  |
| LOC_Os07g08210.3 | cytidyltransferase domain containing protein, expressed                                       | Chr7  | 4185205  | 4188025 -  | 7  | 1672 | 5.06  |
| LOC_Os01g37210.2 | expressed protein                                                                             | Chr1  | 20783355 | 20786656 - | 3  | 1873 | 5.14  |
| LOC_Os11g11256.1 | expressed protein                                                                             | Chr11 | 6228270  | 6230973 +  | 2  | 1852 | 6.25  |
| LOC_Os12g26040.1 | expressed protein                                                                             | Chr12 | 15126681 | 15128000 + | 2  | 706  | 4.65  |
| LOC_Os08g13699.1 | expressed protein                                                                             | Chr8  | 8159951  | 8162760 -  | 2  | 650  | 5.05  |
| LOC_Os04g40330.2 | OsFBX141 - F-box domain containing protein, expressed                                         | Chr4  | 23976077 | 23979533 - | 5  | 2218 | 5.37  |
| LOC_Os04g41830.1 | myb-like DNA-binding domain containing protein, expressed                                     | Chr4  | 24775664 | 24779580 - | 7  | 1441 | 6.64  |
| LOC_Os02g22084.2 | expressed protein                                                                             | Chr2  | 13137869 | 13141343 + | 4  | 2036 | 5.68  |
| LOC_Os03g63090.1 | actin-related protein 2/3 complex subunit 4, putative, expressed                              | Chr3  | 35669657 | 35672795 + | 8  | 1580 | 4.38  |
| LOC_Os05g49050.1 | CobW/P47K family protein, putative, expressed                                                 | Chr5  | 28125211 | 28128402 + | 7  | 1769 | 5.64  |
| LOC_Os07g19540.1 | expressed protein                                                                             | Chr7  | 11582843 | 11584816 + | 5  | 911  | 4.38  |
| LOC_Os02g22374.4 | expressed protein                                                                             | Chr2  | 13361077 | 13361777 - | 2  | 549  | 4.31  |
| LOC_Os05g48230.1 | expressed protein                                                                             | Chr5  | 27643114 | 27647843 + | 15 | 2398 | 5.89  |
| LOC_Os08g38910.3 | caffeoyl-CoA O-methyltransferase, putative, expressed                                         | Chr8  | 24592945 | 24594866 - | 3  | 1819 | 5.52  |
| LOC_Os03g11490.1 | expressed protein                                                                             | Chr3  | 5946380  | 5955641 +  | 10 | 4001 | 5.56  |
| LOC_Os09g33920.1 | expressed protein                                                                             | Chr9  | 20019441 | 20023423 + | 8  | 1883 | 6.28  |
| LOC_Os05g05810.1 | DEAD-box ATP-dependent RNA helicase, putative, expressed                                      | Chr5  | 2906228  | 2913780 -  | 16 | 3664 | 7.40  |
| LOC_Os09g24460.1 | expressed protein                                                                             | Chr9  | 14555403 | 14558306 + | 4  | 2530 | 5.26  |
| LOC_Os03g21620.1 | AGC_AGC_other_RS6K_like.1 - ACG kinases include homologs to PKA, PKG and PKC, expressed       | Chr3  | 12340180 | 12344341 - | 7  | 2544 | 4.52  |
| LOC_Os02g10740.1 | calcium-binding mitochondrial carrier CBG00135, putative, expressed                           | Chr2  | 5663004  | 5668429 -  | 5  | 3086 | 6.79  |
| LOC_Os08g05910.2 | peptide transporter PTR2, putative, expressed                                                 | Chr8  | 3182334  | 3190438 -  | 3  | 1981 | -5.88 |
| LOC_Os01g42980.2 | ribosomal protein L22, putative, expressed                                                    | Chr1  | 24480855 | 24483757 + | 6  | 1632 | 6.05  |
| LOC_Os01g50849.2 | expressed protein                                                                             | Chr1  | 29206326 | 29209607 - | 4  | 2432 | 5.75  |
| LOC_Os01g50849.3 | expressed protein                                                                             | Chr1  | 29206306 | 29209607 - | 5  | 2399 | 5.75  |
| LOC_Os01g50849.1 | expressed protein                                                                             | Chr1  | 29206312 | 29209607 - | 5  | 2390 | 5.75  |
| LOC_Os06g48650.1 | OsSub52 - Putative Subtilisin homologue, expressed                                            | Chr6  | 29434356 | 29441106 + | 11 | 3438 | 5.01  |
| LOC_Os06g08890.1 | glutamate receptor 3.4 precursor, putative, expressed                                         | Chr6  | 4472342  | 4476668 -  | 5  | 2888 | 5.53  |
| LOC_Os01g12900.1 | ras-related protein, putative, expressed                                                      | Chr1  | 7164594  | 7167419 -  | 8  | 1416 | 4.84  |
| LOC_Os04g25140.1 | OsFBDUF20 - F-box and DUF domain containing protein, expressed                                | Chr4  | 14526403 | 14528167 + | 3  | 1670 | 4.62  |
| LOC_Os02g38320.1 | BTBZ3 - Bric-a-Brac, Tramtrack, Broad Complex BTB domain with TAZ zinc finger and Calmodulin- | Chr2  | 23172608 | 23174693 + | 4  | 1214 | 4.21  |
| LOC_Os11g02300.2 | CPuORF36 - conserved peptide uORF-containing transcript, expressed                            | Chr11 | 654974   | 661236 -   | 2  | 5362 | -7.97 |
| LOC_Os01g11260.1 | phospho-N-acetylmuramoyl-pentapeptide-transferase, putative, expressed                        | Chr1  | 6025074  | 6029649 +  | 8  | 2040 | 6.66  |
| LOC_Os09g14510.2 | peroxin-3 family protein, putative, expressed                                                 | Chr9  | 8586239  | 8589949 +  | 6  | 1754 | 6.39  |
| LOC_Os08g12780.5 | chloroplast envelope membrane protein, putative, expressed                                    | Chr8  | 7571731  | 7574295 -  | 5  | 1208 | 4.14  |
| LOC_Os07g23210.1 | transposon protein, putative, unclassified, expressed                                         | Chr7  | 13081471 | 13084596 + | 3  | 3037 | 5.85  |
| LOC_Os02g48840.1 | dual specificity protein phosphatase, putative, expressed                                     | Chr2  | 29882066 | 29885249 + | 5  | 1384 | 4.41  |
| LOC_Os01g42980.1 | ribosomal protein L22, putative, expressed                                                    | Chr1  | 24480855 | 24483757 + | 7  | 1559 | 6.05  |
| LOC_Os01g64370.1 | expressed protein                                                                             | Chr1  | 37360254 | 37363436 - | 2  | 1265 | 4.03  |
| LOC_Os11g39209.1 | expressed protein                                                                             | Chr11 | 23346654 | 23348579 + | 1  | 1958 | 4.51  |
| LOC_Os01g56510.1 | periplasmic beta-glucosidase precursor, putative, expressed                                   | Chr1  | 32580710 | 32586143 - | 13 | 2867 | 5.14  |
| LOC_Os03g11020.1 | PPR repeat containing protein, expressed                                                      | Chr3  | 5669923  | 5672004 +  | 2  | 2053 | 5.49  |



|                  |                                                                             |       |          |            |    |      |      |
|------------------|-----------------------------------------------------------------------------|-------|----------|------------|----|------|------|
| LOC_Os11g02630.1 | expressed protein                                                           | Chr11 | 837783   | 839909 -   | 1  | 2159 | 5.43 |
| LOC_Os07g34750.1 | expressed protein                                                           | Chr7  | 20818884 | 20822105 - | 1  | 3254 | 6.91 |
| LOC_Os02g02670.1 | NBS-LRR disease resistance protein, putative, expressed                     | Chr2  | 988442   | 995506 +   | 8  | 5440 | 4.71 |
| LOC_Os06g04680.2 | expressed protein                                                           | Chr6  | 2039302  | 2041427 -  | 2  | 1681 | 5.05 |
| LOC_Os02g43560.1 | WRKY34, expressed                                                           | Chr2  | 26280253 | 26283914 - | 3  | 3590 | 6.50 |
| LOC_Os02g13950.1 | NHL repeat-containing protein, putative, expressed                          | Chr2  | 7594952  | 7599871 +  | 7  | 2314 | 5.05 |
| LOC_Os01g58080.2 | membrane-associated salt-inducible protein, putative, expressed             | Chr1  | 33593744 | 33597039 + | 2  | 1572 | 6.31 |
| LOC_Os05g05810.2 | DEAD-box ATP-dependent RNA helicase, putative, expressed                    | Chr5  | 2906228  | 2913774 -  | 14 | 3616 | 7.39 |
| LOC_Os09g32640.1 | dehydrogenase, putative, expressed                                          | Chr9  | 19468798 | 19471622 + | 4  | 1446 | 4.78 |
| LOC_Os03g13250.1 | peptide transporter PTR2, putative, expressed                               | Chr3  | 7147278  | 7151340 -  | 5  | 2301 | 5.30 |
| LOC_Os03g17710.1 | splicing factor, arginine/serine-rich, putative, expressed                  | Chr3  | 9852712  | 9856043 -  | 7  | 1680 | 4.57 |
| LOC_Os03g05800.1 | expressed protein                                                           | Chr3  | 2897476  | 2900285 -  | 5  | 1142 | 4.56 |
| LOC_Os08g16130.1 | fiber protein Fb34, putative, expressed                                     | Chr8  | 9830986  | 9834051 -  | 3  | 1161 | 4.84 |
| LOC_Os10g37670.1 | actin-depolymerizing factor, putative, expressed                            | Chr10 | 20160992 | 20162434 - | 3  | 857  | 5.74 |
| LOC_Os07g15270.1 | RNA-binding region RNP-1, putative, expressed                               | Chr7  | 8807273  | 8811507 +  | 3  | 3130 | 7.22 |
| LOC_Os01g12900.3 | ras-related protein, putative, expressed                                    | Chr1  | 7164594  | 7167419 -  | 7  | 1536 | 4.86 |
| LOC_Os03g57560.1 | piwi domain containing protein, expressed                                   | Chr3  | 32813980 | 32822980 + | 26 | 4860 | 4.94 |
| LOC_Os05g51450.1 | OsClp8 - Putative Clp protease homologue, expressed                         | Chr5  | 29495797 | 29499479 - | 9  | 1965 | 6.34 |
| LOC_Os12g02730.1 | histidine triad family protein, putative, expressed                         | Chr12 | 964545   | 966927 +   | 4  | 907  | 5.68 |
| LOC_Os05g48870.7 | auxin response factor 15, putative, expressed                               | Chr5  | 28038009 | 28039900 + | 3  | 1819 | 5.43 |
| LOC_Os03g17710.2 | splicing factor, arginine/serine-rich, putative, expressed                  | Chr3  | 9852711  | 9856043 -  | 7  | 1666 | 4.57 |
| LOC_Os06g13640.2 | expressed protein                                                           | Chr6  | 7555194  | 7558430 -  | 8  | 1506 | 5.35 |
| LOC_Os02g05520.1 | expressed protein                                                           | Chr2  | 2668556  | 2671036 +  | 8  | 1250 | 4.74 |
| LOC_Os03g02690.2 | dihydrodipicolinate reductase, putative, expressed                          | Chr3  | 1004299  | 1007269 +  | 11 | 1796 | 5.04 |
| LOC_Os03g47960.1 | expressed protein                                                           | Chr3  | 27265560 | 27268578 - | 3  | 1654 | 6.53 |
| LOC_Os03g44760.4 | SWI1, putative, expressed                                                   | Chr3  | 25234034 | 25240157 + | 10 | 3187 | 6.15 |
| LOC_Os04g53460.4 | AT hook motif family protein, expressed                                     | Chr4  | 31831107 | 31836454 - | 5  | 2566 | 4.93 |
| LOC_Os04g53460.1 | AT hook motif family protein, expressed                                     | Chr4  | 31831107 | 31836481 - | 7  | 2391 | 4.93 |
| LOC_Os03g44760.5 | SWI1, putative, expressed                                                   | Chr3  | 25234076 | 25240157 + | 10 | 3154 | 6.15 |
| LOC_Os04g53460.3 | AT hook motif family protein, expressed                                     | Chr4  | 31831107 | 31836454 - | 7  | 2355 | 4.93 |
| LOC_Os05g48870.8 | auxin response factor 15, putative, expressed                               | Chr5  | 28038009 | 28039890 + | 2  | 1863 | 5.46 |
| LOC_Os01g43060.1 | expressed protein                                                           | Chr1  | 24569001 | 24571535 - | 5  | 1219 | 5.96 |
| LOC_Os03g40310.1 | RNA recognition motif containing protein, putative, expressed               | Chr3  | 22413557 | 22418672 - | 3  | 1133 | 5.67 |
| LOC_Os03g02690.3 | dihydrodipicolinate reductase, putative, expressed                          | Chr3  | 1004299  | 1007269 +  | 11 | 1815 | 5.04 |
| LOC_Os03g17164.1 | kinesin-related protein, putative, expressed                                | Chr3  | 9546132  | 9550718 +  | 18 | 3024 | 6.06 |
| LOC_Os02g24020.1 | dihydrodipicolinate reductase, putative, expressed                          | Chr2  | 13917235 | 13923065 - | 8  | 1691 | 5.42 |
| LOC_Os10g34614.4 | csAtPR5, putative, expressed                                                | Chr10 | 18451019 | 18452610 + | 3  | 1046 | 5.53 |
| LOC_Os06g08910.2 | glutamate receptor 2.8 precursor, putative, expressed                       | Chr6  | 4489429  | 4493878 -  | 6  | 2606 | 5.95 |
| LOC_Os12g03750.1 | Leucine Rich Repeat family protein, expressed                               | Chr12 | 1521080  | 1526548 +  | 8  | 2866 | 5.83 |
| LOC_Os05g48870.5 | auxin response factor 15, putative, expressed                               | Chr5  | 28038009 | 28039900 + | 4  | 1779 | 5.43 |
| LOC_Os03g47990.1 | OB-fold nucleic acid binding domain containing protein, putative, expressed | Chr3  | 27283074 | 27286338 + | 4  | 1184 | 4.37 |
| LOC_Os11g37060.1 | OsFBDUF52 - F-box and DUF domain containing protein, expressed              | Chr11 | 21881616 | 21882979 + | 1  | 1396 | 4.95 |
| LOC_Os05g34800.1 | expressed protein                                                           | Chr5  | 20648285 | 20650530 - | 1  | 2278 | 5.26 |
| LOC_Os03g49710.1 | ribosomal protein S13p/S18e, putative, expressed                            | Chr3  | 28301288 | 28303246 + | 3  | 978  | 7.18 |
| LOC_Os01g26290.1 | expressed protein                                                           | Chr1  | 14901174 | 14903208 + | 4  | 590  | 4.39 |

|                  |                                                                                                 |       |          |            |    |      |       |
|------------------|-------------------------------------------------------------------------------------------------|-------|----------|------------|----|------|-------|
| LOC_Os04g49900.1 | ABC transporter family protein, putative, expressed                                             | Chr4  | 29754938 | 29762118 + | 11 | 4600 | -5.29 |
| LOC_Os07g08210.2 | cytidyltransferase domain containing protein, expressed                                         | Chr7  | 4185205  | 4188035 -  | 6  | 1785 | 5.06  |
| LOC_Os01g42510.1 | expressed protein                                                                               | Chr1  | 24168245 | 24171441 - | 5  | 921  | 5.28  |
| LOC_Os05g30130.1 | chaperone protein dnaJ 49, putative, expressed                                                  | Chr5  | 17441559 | 17445927 - | 3  | 2000 | 5.65  |
| LOC_Os08g30820.1 | cleavage and polyadenylation specificity factor subunit 5, putative, expressed                  | Chr8  | 19031135 | 19033307 - | 6  | 1762 | 5.37  |
| LOC_Os11g02464.1 | vacuolar-sorting receptor precursor, putative, expressed                                        | Chr11 | 742793   | 747743 -   | 12 | 2999 | 5.41  |
| LOC_Os01g74030.1 | pumilio-family RNA binding protein, putative, expressed                                         | Chr1  | 42876539 | 42882964 - | 9  | 3928 | 7.66  |
| LOC_Os08g37130.1 | oxidoreductase, short chain dehydrogenase/reductase family domain containing protein, expressed | Chr8  | 23463933 | 23468392 + | 5  | 1608 | 5.26  |
| LOC_Os01g12540.1 | GTPase of unknown function domain containing protein, putative, expressed                       | Chr1  | 6897571  | 6904232 +  | 9  | 2636 | 6.62  |
| LOC_Os08g40430.1 | mTERF domain containing protein, expressed                                                      | Chr8  | 25588052 | 25590594 - | 3  | 2333 | 5.60  |
| LOC_Os03g11990.2 | bolA, putative, expressed                                                                       | Chr3  | 6282854  | 6284348 +  | 3  | 693  | 4.21  |
| LOC_Os02g13990.2 | U2 small nuclear ribonucleoprotein A, putative, expressed                                       | Chr2  | 7632580  | 7635244 -  | 4  | 1066 | 4.72  |
| LOC_Os03g53140.1 | protein transport protein Sec23B, putative, expressed                                           | Chr3  | 30476539 | 30482133 + | 3  | 3347 | 5.79  |
| LOC_Os07g29390.2 | peptidyl-prolyl cis-trans isomerase, putative, expressed                                        | Chr7  | 17254909 | 17260585 - | 8  | 2075 | 5.49  |
| LOC_Os03g44760.1 | SWI1, putative, expressed                                                                       | Chr3  | 25234036 | 25240219 + | 11 | 3366 | 6.19  |
| LOC_Os09g35740.1 | expressed protein                                                                               | Chr9  | 20557996 | 20559164 + | 2  | 1112 | 6.41  |
| LOC_Os12g18130.3 | expressed protein                                                                               | Chr12 | 10454432 | 10455596 - | 2  | 725  | 4.31  |
| LOC_Os04g39780.1 | AMP-binding enzyme family protein, expressed                                                    | Chr4  | 23698662 | 23707348 - | 7  | 7676 | 6.41  |
| LOC_Os11g44940.1 | seed maturation protein PM27, putative, expressed                                               | Chr11 | 27200303 | 27202904 - | 3  | 1099 | 5.05  |
| LOC_Os09g24670.1 | CAAX amino terminal protease family protein, putative, expressed                                | Chr9  | 14680807 | 14684519 + | 10 | 1648 | 6.87  |
| LOC_Os02g31080.1 | hydroxyproline-rich glycoprotein family protein, putative, expressed                            | Chr2  | 18575033 | 18581693 - | 11 | 2992 | 5.62  |
| LOC_Os07g40224.1 | expressed protein                                                                               | Chr7  | 24118352 | 24120813 + | 4  | 1874 | 6.33  |
| LOC_Os05g30430.1 | expressed protein                                                                               | Chr5  | 17637784 | 17641319 - | 4  | 1686 | 5.85  |
| LOC_Os02g49770.1 | NHL repeat-containing protein, putative, expressed                                              | Chr2  | 30427720 | 30431741 + | 7  | 2182 | 5.03  |
| LOC_Os01g35160.2 | TKL_IRAK_DUF26-lh.4 - DUF26 kinases have homology to DUF26 containing loci, expressed           | Chr1  | 19454154 | 19458314 - | 7  | 3758 | 4.90  |
| LOC_Os03g55430.1 | expressed protein                                                                               | Chr3  | 31537854 | 31538849 + | 2  | 985  | 4.58  |
| LOC_Os04g47906.2 | gamma-tubulin complex component 6, putative, expressed                                          | Chr4  | 28484045 | 28488670 - | 8  | 1493 | 5.09  |
| LOC_Os04g53460.2 | AT hook motif family protein, expressed                                                         | Chr4  | 31831107 | 31836454 - | 7  | 2396 | 4.94  |
| LOC_Os11g02760.1 | histidine triad family protein, putative, expressed                                             | Chr11 | 905662   | 907831 +   | 4  | 921  | 4.42  |
| LOC_Os02g38490.1 | expressed protein                                                                               | Chr2  | 23272523 | 23273346 + | 3  | 682  | 4.25  |
| LOC_Os04g40330.3 | OsFBX141 - F-box domain containing protein, expressed                                           | Chr4  | 23976077 | 23979533 - | 5  | 2316 | 5.41  |
| LOC_Os01g35160.1 | TKL_IRAK_DUF26-lh.4 - DUF26 kinases have homology to DUF26 containing loci, expressed           | Chr1  | 19454154 | 19458314 - | 7  | 3803 | 4.90  |
| LOC_Os01g39810.3 | Alg9-like mannosyltransferase protein, putative, expressed                                      | Chr1  | 22450498 | 22456233 + | 8  | 4342 | 4.49  |
| LOC_Os04g40330.1 | OsFBX141 - F-box domain containing protein, expressed                                           | Chr4  | 23976077 | 23979533 - | 5  | 2319 | 5.41  |
| LOC_Os01g63420.1 | OsFBL4 - F-box domain and LRR containing protein, expressed                                     | Chr1  | 36746807 | 36750976 + | 4  | 2366 | 6.20  |
| LOC_Os09g14540.1 | protein phosphatase 2C, putative, expressed                                                     | Chr9  | 8603462  | 8609274 -  | 11 | 1663 | 6.20  |
| LOC_Os10g10300.1 | retrotransposon protein, putative, unclassified, expressed                                      | Chr10 | 5657199  | 5662154 -  | 6  | 4254 | 5.06  |
| LOC_Os09g14510.1 | peroxin-3 family protein, putative, expressed                                                   | Chr9  | 8585970  | 8589949 +  | 7  | 1918 | 6.39  |
| LOC_Os12g42060.1 | OsWAK128b - OsWAK receptor-like protein kinase, expressed                                       | Chr12 | 26087069 | 26090656 + | 3  | 1751 | 6.42  |
| LOC_Os10g25000.1 | expressed protein                                                                               | Chr10 | 12867952 | 12869919 - | 7  | 1216 | 4.59  |
| LOC_Os07g08320.1 | RNA recognition motif containing protein, expressed                                             | Chr7  | 4253896  | 4259355 -  | 9  | 2241 | 5.83  |
| LOC_Os03g56900.1 | reticulon domain containing protein, putative, expressed                                        | Chr3  | 32401938 | 32404752 - | 6  | 1336 | 5.27  |
| LOC_Os01g54424.1 | expressed protein                                                                               | Chr1  | 31313396 | 31317560 - | 4  | 1649 | 5.26  |
| LOC_Os08g43550.1 | MYB family transcription factor, putative, expressed                                            | Chr8  | 27547971 | 27549173 - | 2  | 1191 | -5.44 |
| LOC_Os04g57739.1 | expressed protein                                                                               | Chr4  | 34393144 | 34396573 + | 4  | 1323 | 6.55  |

|                  |                                                                                                |       |          |            |    |      |       |
|------------------|------------------------------------------------------------------------------------------------|-------|----------|------------|----|------|-------|
| LOC_Os10g21020.1 | expressed protein                                                                              | Chr10 | 10653202 | 10654972 - | 3  | 949  | 5.06  |
| LOC_Os03g44760.2 | SWI1, putative, expressed                                                                      | Chr3  | 25234036 | 25240219 + | 10 | 3271 | 6.18  |
| LOC_Os09g37720.1 | RNA recognition motif containing protein, expressed                                            | Chr9  | 21742603 | 21743594 - | 1  | 1024 | 6.53  |
| LOC_Os11g37560.2 | expressed protein                                                                              | Chr11 | 22175492 | 22178883 - | 4  | 2198 | 6.55  |
| LOC_Os05g02420.1 | expressed protein                                                                              | Chr5  | 801087   | 803464 +   | 1  | 2410 | -4.88 |
| LOC_Os02g34990.1 | ACT domain containing protein, putative, expressed                                             | Chr2  | 20989673 | 20994251 + | 9  | 2724 | 4.56  |
| LOC_Os04g57900.1 | PPR repeat containing protein, expressed                                                       | Chr4  | 34498539 | 34500540 - | 1  | 2034 | 5.47  |
| LOC_Os07g25060.1 | thionin-like peptide, putative, expressed                                                      | Chr7  | 14303367 | 14303874 + | 2  | 325  | -8.88 |
| LOC_Os05g46920.1 | expressed protein                                                                              | Chr5  | 27150614 | 27153839 + | 4  | 2226 | 5.31  |
| LOC_Os04g43750.1 | kinase, pfkB family, putative, expressed                                                       | Chr4  | 25898097 | 25902359 - | 13 | 1947 | 4.88  |
| LOC_Os11g37560.1 | expressed protein                                                                              | Chr11 | 22175492 | 22178883 - | 4  | 2204 | 6.55  |
| LOC_Os01g39810.4 | Alg9-like mannosyltransferase protein, putative, expressed                                     | Chr1  | 22450498 | 22455557 + | 7  | 3048 | 4.37  |
| LOC_Os04g43750.2 | kinase, pfkB family, putative, expressed                                                       | Chr4  | 25898097 | 25902365 - | 13 | 1941 | 4.88  |
| LOC_Os01g63250.1 | josephin, putative, expressed                                                                  | Chr1  | 36656340 | 36660768 - | 2  | 1581 | 5.13  |
| LOC_Os09g28300.2 | remorin C-terminal domain containing protein, putative, expressed                              | Chr9  | 17183709 | 17188378 + | 8  | 2826 | 6.24  |
| LOC_Os02g19440.1 | sirohydrochlorin ferrochelataase, putative, expressed                                          | Chr2  | 11353281 | 11357740 - | 7  | 1632 | 5.00  |
| LOC_Os09g28300.1 | remorin C-terminal domain containing protein, putative, expressed                              | Chr9  | 17182867 | 17188378 + | 8  | 3164 | 6.24  |
| LOC_Os01g39810.2 | Alg9-like mannosyltransferase protein, putative, expressed                                     | Chr1  | 22450498 | 22455557 + | 9  | 2894 | 4.37  |
| LOC_Os01g72020.2 | BTBA3 - Bric-a-Brac, Tramtrack, Broad Complex BTB domain with Ankyrin repeat region, expressed | Chr1  | 41741486 | 41744666 - | 2  | 2019 | 5.64  |
| LOC_Os01g12830.2 | erythronate-4-phosphate dehydrogenase domain containing protein, expressed                     | Chr1  | 7100982  | 7103266 -  | 2  | 1475 | 4.75  |
| LOC_Os06g31220.1 | mitogen-activated protein kinase 17, putative, expressed                                       | Chr6  | 18158734 | 18165296 - | 11 | 3964 | 5.83  |
| LOC_Os03g56900.2 | reticulon domain containing protein, putative, expressed                                       | Chr3  | 32401938 | 32404752 - | 5  | 1421 | 5.32  |
| LOC_Os04g28300.1 | Rf1, mitochondrial precursor, putative, expressed                                              | Chr4  | 16753556 | 16757223 + | 3  | 2631 | 6.56  |
| LOC_Os05g30430.2 | expressed protein                                                                              | Chr5  | 17637782 | 17641309 + | 3  | 1737 | 5.85  |
| LOC_Os09g32660.1 | expressed protein                                                                              | Chr9  | 19478653 | 19482093 - | 5  | 2063 | 5.83  |
| LOC_Os04g42480.1 | receptor-like protein kinase At3g46290 precursor, putative, expressed                          | Chr4  | 25140210 | 25145158 + | 5  | 3457 | -3.77 |
| LOC_Os06g05700.1 | cysteine synthase, putative, expressed                                                         | Chr6  | 2579088  | 2581726 +  | 7  | 1578 | 4.80  |
| LOC_Os02g38490.2 | expressed protein                                                                              | Chr2  | 23272523 | 23273306 + | 3  | 647  | 4.18  |
| LOC_Os05g48870.6 | auxin response factor 15, putative, expressed                                                  | Chr5  | 28038009 | 28039890 + | 4  | 1736 | 5.41  |
| LOC_Os04g54240.1 | wound induced protein, putative, expressed                                                     | Chr4  | 32301622 | 32302456 - | 1  | 867  | 8.08  |
| LOC_Os04g49150.1 | OsMADS17 - MADS-box family gene with MIKc type-box, expressed                                  | Chr4  | 29308245 | 29314112 + | 8  | 1381 | 7.72  |
| LOC_Os01g63420.2 | OsFBL4 - F-box domain and LRR containing protein, expressed                                    | Chr1  | 36747271 | 36750976 + | 3  | 2559 | 6.20  |
| LOC_Os09g21340.1 | nucleobase-ascorbate transporter, putative, expressed                                          | Chr9  | 12884071 | 12888677 + | 14 | 3282 | 6.60  |
| LOC_Os08g05910.1 | peptide transporter PTR2, putative, expressed                                                  | Chr8  | 3182309  | 3190451 +  | 3  | 2452 | -5.88 |
| LOC_Os01g06000.1 | PPR repeat containing protein, expressed                                                       | Chr1  | 2862560  | 2867272 -  | 4  | 3354 | 6.40  |
| LOC_Os05g44160.1 | expressed protein                                                                              | Chr5  | 25663014 | 25665565 + | 2  | 633  | 4.66  |
| LOC_Os12g25720.1 | expressed protein                                                                              | Chr12 | 14912243 | 14916625 - | 4  | 1810 | 6.22  |
| LOC_Os09g14510.3 | peroxin-3 family protein, putative, expressed                                                  | Chr9  | 8585970  | 8589949 +  | 6  | 1989 | 6.39  |
| LOC_Os06g41780.1 | guanine nucleotide exchange family protein, putative, expressed                                | Chr6  | 25050893 | 25054512 + | 6  | 2885 | 5.41  |
| LOC_Os02g37920.1 | expressed protein                                                                              | Chr2  | 22917816 | 22924489 - | 12 | 3877 | 5.43  |
| LOC_Os08g40930.1 | Alpha amylase, catalytic domain containing protein, expressed                                  | Chr8  | 25892391 | 25900576 - | 18 | 4348 | 4.39  |
| LOC_Os01g58080.3 | membrane-associated salt-inducible protein, putative, expressed                                | Chr1  | 33593797 | 33597053 + | 2  | 1586 | 6.36  |
| LOC_Os01g63420.3 | OsFBL4 - F-box domain and LRR containing protein, expressed                                    | Chr1  | 36747271 | 36750976 + | 2  | 2607 | 6.20  |
| LOC_Os03g02690.1 | dihydrodipicolinate reductase, putative, expressed                                             | Chr3  | 1004394  | 1007269 +  | 10 | 1790 | 5.07  |
| LOC_Os11g08370.1 | transporter, major facilitator family, putative, expressed                                     | Chr11 | 4413240  | 4415870 +  | 2  | 2160 | 5.08  |

|                  |                                                                        |       |          |            |    |      |       |
|------------------|------------------------------------------------------------------------|-------|----------|------------|----|------|-------|
| LOC_Os03g12236.1 | heat shock protein DnaJ, putative, expressed                           | Chr3  | 6421734  | 6426920 +  | 10 | 3110 | 4.44  |
| LOC_Os03g12236.2 | heat shock protein DnaJ, putative, expressed                           | Chr3  | 6421840  | 6426920 +  | 11 | 3128 | 4.44  |
| LOC_Os01g48440.1 | glycosyltransferase family 43 protein, putative, expressed             | Chr1  | 27757763 | 27761733 - | 4  | 2450 | -6.16 |
| LOC_Os02g42550.1 | expressed protein                                                      | Chr2  | 25579455 | 25582099 - | 6  | 1484 | 5.93  |
| LOC_Os01g68730.2 | RNA-binding protein FUS, putative, expressed                           | Chr1  | 39922193 | 39923794 - | 2  | 1547 | -7.50 |
| LOC_Os10g11340.1 | nitroreductase family protein, putative, expressed                     | Chr10 | 6287535  | 6291740 +  | 3  | 3017 | 5.36  |
| LOC_Os01g68730.1 | RNA-binding protein FUS, putative, expressed                           | Chr1  | 39922192 | 39923794 - | 2  | 1552 | -7.50 |
| LOC_Os04g58630.2 | DNA mismatch repair protein MSH3, putative, expressed                  | Chr4  | 34869997 | 34877172 - | 13 | 4398 | 6.25  |
| LOC_Os03g02590.3 | peroxisomal biogenesis factor 11, putative, expressed                  | Chr3  | 956806   | 960249 -   | 8  | 2751 | 6.20  |
| LOC_Os12g32230.2 | molybdenum cofactor biosynthesis protein 1, putative, expressed        | Chr12 | 19452169 | 19456650 + | 8  | 2051 | 6.05  |
| LOC_Os05g48870.9 | auxin response factor 15, putative, expressed                          | Chr5  | 28038009 | 28039890 + | 4  | 1740 | 5.40  |
| LOC_Os04g33330.2 | expressed protein                                                      | Chr4  | 20186829 | 20189403 - | 2  | 2052 | 5.80  |
| LOC_Os05g35740.3 | subtilisin N-terminal Region family protein, expressed                 | Chr5  | 21216024 | 21216932 - | 2  | 740  | 5.09  |
| LOC_Os04g33760.1 | DUF584 domain containing protein, putative, expressed                  | Chr4  | 20443290 | 20444654 + | 1  | 1397 | 5.25  |
| LOC_Os05g07764.1 | carboxyl-terminal proteinase, putative, expressed                      | Chr5  | 4179894  | 4185777 -  | 7  | 2185 | 5.05  |
| LOC_Os07g01300.1 | expressed protein                                                      | Chr7  | 182511   | 183243 -   | 2  | 687  | 5.40  |
| LOC_Os06g03690.2 | RNA recognition motif containing protein, putative, expressed          | Chr6  | 1455383  | 1458725 +  | 6  | 1623 | 6.08  |
| LOC_Os12g32230.1 | molybdenum cofactor biosynthesis protein 1, putative, expressed        | Chr12 | 19452169 | 19456650 + | 8  | 2046 | 6.05  |
| LOC_Os03g19920.1 | expressed protein                                                      | Chr3  | 11199350 | 11205122 - | 10 | 2652 | 5.95  |
| LOC_Os06g36220.1 | OsFBX198 - F-box domain containing protein, expressed                  | Chr6  | 21213899 | 21218155 - | 5  | 1919 | 6.83  |
| LOC_Os04g49990.1 | AT hook motif domain containing protein, expressed                     | Chr4  | 29814033 | 29818138 - | 6  | 1835 | 6.70  |
| LOC_Os02g57670.1 | ribosomal L9, putative, expressed                                      | Chr2  | 35320313 | 35322987 - | 7  | 1311 | 5.92  |
| LOC_Os07g06970.1 | HEN1, putative, expressed                                              | Chr7  | 3429443  | 3434747 -  | 10 | 3540 | 6.24  |
| LOC_Os02g41630.2 | phenylalanine ammonia-lyase, putative, expressed                       | Chr2  | 24973386 | 24977336 - | 2  | 2678 | -4.98 |
| LOC_Os01g12900.2 | ras-related protein, putative, expressed                               | Chr1  | 7165312  | 7167419 -  | 5  | 1129 | 5.52  |
| LOC_Os04g49620.1 | DUF581 domain containing protein, expressed                            | Chr4  | 29588213 | 29590515 - | 2  | 1181 | 6.01  |
| LOC_Os01g59490.1 | FAD dependent oxidoreductase domain containing protein, expressed      | Chr1  | 34406376 | 34409218 + | 5  | 1763 | 5.49  |
| LOC_Os01g58080.1 | membrane-associated salt-inducible protein, putative, expressed        | Chr1  | 33593744 | 33597339 + | 3  | 1816 | 6.45  |
| LOC_Os11g37090.1 | pumilio-family RNA binding repeat domain containing protein, expressed | Chr11 | 21892581 | 21897269 - | 6  | 3377 | 6.02  |
| LOC_Os05g06510.2 | 4Fe-4S binding domain containing protein, expressed                    | Chr5  | 3348811  | 3352850 -  | 12 | 2134 | 6.63  |
| LOC_Os03g53140.3 | protein transport protein Sec23B, putative, expressed                  | Chr3  | 30476541 | 30482124 + | 4  | 3591 | 6.71  |
| LOC_Os06g07190.2 | RNA polymerase Rpb7, N-terminal domain containing protein, expressed   | Chr6  | 3440104  | 3443076 +  | 6  | 1420 | 5.44  |
| LOC_Os02g38490.3 | expressed protein                                                      | Chr2  | 23272547 | 23273306 + | 2  | 717  | 4.18  |
| LOC_Os04g40340.1 | expressed protein                                                      | Chr4  | 23984033 | 23987369 - | 8  | 989  | 4.52  |
| LOC_Os05g06510.1 | 4Fe-4S binding domain containing protein, expressed                    | Chr5  | 3348811  | 3352850 -  | 12 | 2140 | 6.63  |
| LOC_Os02g42210.1 | membrane-associated salt-inducible protein like, putative, expressed   | Chr2  | 25392975 | 25394765 + | 1  | 1823 | 4.96  |
| LOC_Os10g03730.1 | OsFBX347 - F-box domain containing protein, expressed                  | Chr10 | 1681080  | 1684278 -  | 4  | 1948 | 5.20  |
| LOC_Os01g22010.3 | S-adenosylmethionine synthetase, putative, expressed                   | Chr1  | 12363709 | 12366314 - | 2  | 1952 | -5.87 |
| LOC_Os07g36150.1 | formin-like protein 3 precursor, putative, expressed                   | Chr7  | 21594798 | 21600723 - | 6  | 4083 | 4.53  |
| LOC_Os07g40460.1 | prefoldin, putative, expressed                                         | Chr7  | 24243946 | 24247474 + | 5  | 1409 | 4.56  |
| LOC_Os01g53720.1 | expressed protein                                                      | Chr1  | 30879000 | 30886338 + | 11 | 3845 | -4.01 |
| LOC_Os01g22010.1 | S-adenosylmethionine synthetase, putative, expressed                   | Chr1  | 12363709 | 12366314 - | 2  | 1959 | -5.87 |
| LOC_Os02g50680.3 | AAA-type ATPase family protein, putative, expressed                    | Chr2  | 30960020 | 30965278 - | 11 | 2454 | 6.80  |
| LOC_Os03g40930.1 | expressed protein                                                      | Chr3  | 22744328 | 22746916 - | 3  | 2141 | 5.84  |
| LOC_Os03g59330.1 | polygalacturonase, putative, expressed                                 | Chr3  | 33777510 | 33781305 + | 7  | 2514 | 5.38  |

|                  |                                                                                                |       |          |            |    |      |       |
|------------------|------------------------------------------------------------------------------------------------|-------|----------|------------|----|------|-------|
| LOC_Os01g61250.1 | methyltransferase, putative, expressed                                                         | Chr1  | 35436701 | 35441737 + | 8  | 2778 | 5.77  |
| LOC_Os08g08860.1 | CRS2-associated factor 2, mitochondrial precursor, putative, expressed                         | Chr8  | 5146984  | 5150352 -  | 5  | 2231 | 6.86  |
| LOC_Os03g02590.2 | peroxisomal biogenesis factor 11, putative, expressed                                          | Chr3  | 956806   | 960245 -   | 8  | 2823 | 6.20  |
| LOC_Os05g11730.1 | CGMC_GSK.7 - CGMC includes CDA, MAPK, GSK3, and CLKC kinases, expressed                        | Chr5  | 6657481  | 6661493 -  | 12 | 2247 | 6.09  |
| LOC_Os02g50680.2 | AAA-type ATPase family protein, putative, expressed                                            | Chr2  | 30960020 | 30965278 - | 11 | 2466 | 6.80  |
| LOC_Os12g04590.1 | zinc finger, C3HC4 type domain containing protein, expressed                                   | Chr12 | 1939516  | 1941122 -  | 2  | 1558 | 5.99  |
| LOC_Os05g02530.1 | glutathione S-transferase, N-terminal domain containing protein, expressed                     | Chr5  | 876950   | 880628 -   | 6  | 1577 | 5.07  |
| LOC_Os04g33470.1 | Ser/Thr protein phosphatase family protein, putative, expressed                                | Chr4  | 20245221 | 20249961 - | 4  | 1488 | 4.67  |
| LOC_Os03g46730.1 | expressed protein                                                                              | Chr3  | 26442702 | 26444359 + | 2  | 825  | 5.78  |
| LOC_Os01g22010.4 | S-adenosylmethionine synthetase, putative, expressed                                           | Chr1  | 12363709 | 12366314 - | 2  | 1996 | -5.87 |
| LOC_Os01g61430.1 | HIT zinc finger domain containing protein, expressed                                           | Chr1  | 35518547 | 35523582 - | 9  | 1382 | 4.55  |
| LOC_Os02g25780.1 | expressed protein                                                                              | Chr2  | 15106302 | 15107393 + | 1  | 1124 | 4.45  |
| LOC_Os07g44740.1 | chaperonin, putative, expressed                                                                | Chr7  | 26705892 | 26707887 + | 3  | 724  | 4.76  |
| LOC_Os01g48850.1 | auxin-responsive protein, putative, expressed                                                  | Chr1  | 28028738 | 28032031 - | 4  | 2121 | 5.10  |
| LOC_Os01g64670.1 | soluble inorganic pyrophosphatase, putative, expressed                                         | Chr1  | 37521803 | 37524040 - | 8  | 1795 | 5.14  |
| LOC_Os11g44940.2 | seed maturation protein PM27, putative, expressed                                              | Chr11 | 27200306 | 27202286 - | 2  | 1272 | 5.05  |
| LOC_Os02g05600.1 | expressed protein                                                                              | Chr2  | 2722136  | 2725218 +  | 4  | 1842 | 7.50  |
| LOC_Os12g33240.3 | mitochondrial ribosomal protein S10, putative, expressed                                       | Chr12 | 20105721 | 20108020 + | 2  | 1096 | 6.06  |
| LOC_Os09g38070.1 | expressed protein                                                                              | Chr9  | 21936981 | 21938550 - | 1  | 1602 | 4.18  |
| LOC_Os02g12480.1 | expressed protein                                                                              | Chr2  | 6508832  | 6513827 -  | 2  | 4110 | -4.31 |
| LOC_Os02g15270.1 | tyrosine-protein phosphatase YVH1, putative, expressed                                         | Chr2  | 8536374  | 8538681 +  | 3  | 1313 | 4.54  |
| LOC_Os07g12810.1 | expressed protein                                                                              | Chr7  | 7324261  | 7329317 -  | 11 | 2225 | 4.07  |
| LOC_Os04g41140.1 | PPR repeat containing protein, expressed                                                       | Chr4  | 24399162 | 24402461 - | 2  | 2794 | 5.34  |
| LOC_Os01g63970.1 | sialyltransferase family domain containing protein, expressed                                  | Chr1  | 37133557 | 37135392 + | 1  | 1868 | 5.05  |
| LOC_Os12g33240.2 | mitochondrial ribosomal protein S10, putative, expressed                                       | Chr12 | 20105721 | 20108020 + | 2  | 1081 | 6.06  |
| LOC_Os01g48440.2 | glycosyltransferase family 43 protein, putative, expressed                                     | Chr1  | 27757763 | 27761733 - | 5  | 2629 | -6.11 |
| LOC_Os02g36960.1 | choline transporter-related, putative, expressed                                               | Chr2  | 22327294 | 22331805 - | 6  | 2299 | 5.01  |
| LOC_Os05g07764.2 | carboxyl-terminal proteinase, putative, expressed                                              | Chr5  | 4179894  | 4185986 -  | 8  | 2313 | 5.05  |
| LOC_Os01g25440.1 | thiamin pyrophosphokinase 1, putative, expressed                                               | Chr1  | 14391999 | 14398598 - | 7  | 1900 | 3.93  |
| LOC_Os08g38910.1 | caffeoyl-CoA O-methyltransferase, putative, expressed                                          | Chr8  | 24592945 | 24597553 - | 5  | 1697 | 5.49  |
| LOC_Os07g02780.1 | STE_MEKK_ste11_MAP3K.20 - STE kinases include homologs to sterile 7, sterile 11 and sterile 20 | Chr7  | 1015338  | 1021609 -  | 11 | 3337 | 4.41  |
| LOC_Os12g35040.1 | 2,3-bisphosphoglycerate-independent phosphoglycerate mutase, putative, expressed               | Chr12 | 21324772 | 21327652 - | 5  | 1932 | 4.79  |
| LOC_Os04g31971.1 | expressed protein                                                                              | Chr4  | 19148767 | 19152021 + | 6  | 2028 | 4.90  |
| LOC_Os01g51754.1 | alpha-amylase precursor, putative, expressed                                                   | Chr1  | 29760719 | 29770037 + | 11 | 4760 | 7.26  |
| LOC_Os05g15160.1 | phosphate/phosphate translocator, putative, expressed                                          | Chr5  | 8600456  | 8609826 +  | 12 | 2063 | 5.75  |
| LOC_Os11g27799.1 | expressed protein                                                                              | Chr11 | 16004377 | 16007344 + | 1  | 3000 | 4.41  |
| LOC_Os11g39254.1 | expressed protein                                                                              | Chr11 | 23375142 | 23376295 + | 2  | 847  | 4.17  |
| LOC_Os01g70920.4 | cullin-1, putative, expressed                                                                  | Chr1  | 41052348 | 41053949 + | 3  | 634  | 4.99  |
| LOC_Os02g43370.1 | transposon protein, putative, unclassified, expressed                                          | Chr2  | 26170387 | 26174970 - | 8  | 3463 | 7.27  |
| LOC_Os07g40460.3 | prefoldin, putative, expressed                                                                 | Chr7  | 24244101 | 24247474 + | 5  | 1280 | 4.56  |
| LOC_Os06g21380.1 | OsCttP3 - Putative C-terminal processing peptidase homologue, expressed                        | Chr6  | 12345920 | 12350139 + | 12 | 2373 | 5.50  |
| LOC_Os04g38900.2 | prohibitin, putative, expressed                                                                | Chr4  | 23116692 | 23117963 - | 1  | 1304 | 4.17  |
| LOC_Os09g26730.1 | chaperonin, putative, expressed                                                                | Chr9  | 16236438 | 16240793 - | 5  | 1416 | 7.04  |
| LOC_Os01g48700.1 | transcription factor Dp, putative, expressed                                                   | Chr1  | 27924901 | 27928433 - | 8  | 1441 | 5.37  |
| LOC_Os05g13300.1 | helicase, putative, expressed                                                                  | Chr5  | 7367166  | 7374483 -  | 11 | 3695 | 6.43  |

|                  |                                                                                           |       |          |            |    |      |       |
|------------------|-------------------------------------------------------------------------------------------|-------|----------|------------|----|------|-------|
| LOC_Os05g26020.1 | cyclin, putative, expressed                                                               | Chr5  | 15124584 | 15125829 + | 1  | 1278 | 5.65  |
| LOC_Os09g27980.1 | emp24/gp25L/p24 family protein, putative, expressed                                       | Chr9  | 16996540 | 16999938 + | 4  | 1371 | 5.93  |
| LOC_Os02g45120.3 | expressed protein                                                                         | Chr2  | 27369109 | 27371822 + | 3  | 1165 | 4.74  |
| LOC_Os01g01350.1 | SNF7 domain containing protein, putative, expressed                                       | Chr1  | 170712   | 173191 -   | 7  | 1375 | 6.12  |
| LOC_Os04g48230.1 | dehydration response related protein, putative, expressed                                 | Chr4  | 28722495 | 28727647 - | 8  | 3474 | 4.52  |
| LOC_Os05g22930.1 | CAAX amino terminal protease family protein, putative, expressed                          | Chr5  | 13057100 | 13060306 - | 8  | 1474 | 5.34  |
| LOC_Os05g33290.1 | uncharacterized conserved membrane protein specific to cyanobacteria, putative, expressed | Chr5  | 19509973 | 19514162 - | 9  | 1522 | 5.89  |
| LOC_Os09g35670.1 | expressed protein                                                                         | Chr9  | 20519235 | 20522576 + | 9  | 1370 | 5.62  |
| LOC_Os04g52670.1 | OsSAUR21 - Auxin-responsive SAUR gene family member, expressed                            | Chr4  | 31349656 | 31350722 - | 1  | 1099 | 5.51  |
| LOC_Os04g58990.1 | CAMK_CAMK_like_ULKh_APGy.3 - CAMK includes calcium/calmodulin depedent protein kinases,   | Chr4  | 35089348 | 35091263 - | 8  | 1365 | 6.15  |
| LOC_Os02g35700.3 | nucleoside diphosphate kinase, putative, expressed                                        | Chr2  | 21453117 | 21454141 + | 2  | 650  | 4.89  |
| LOC_Os02g12480.4 | expressed protein                                                                         | Chr2  | 6508832  | 6513830 -  | 4  | 1787 | -3.27 |
| LOC_Os06g41390.4 | N-terminal asparagine amidohydrolase, putative, expressed                                 | Chr6  | 24814004 | 24817722 - | 8  | 2293 | 5.37  |
| LOC_Os05g44800.4 | expressed protein                                                                         | Chr5  | 26049874 | 26051858 + | 6  | 846  | 5.17  |
| LOC_Os03g58170.1 | stem-specific protein TSJT1, putative, expressed                                          | Chr3  | 33110745 | 33118318 + | 5  | 1764 | 4.68  |
| LOC_Os08g36170.1 | cytokinesis negative regulator RCP1, putative, expressed                                  | Chr8  | 22808465 | 22814436 + | 2  | 1704 | 5.42  |
| LOC_Os10g04074.1 | retrotransposon protein, putative, unclassified, expressed                                | Chr10 | 1879935  | 1887750 +  | 1  | 7848 | 3.40  |
| LOC_Os01g03720.1 | MYB family transcription factor, putative, expressed                                      | Chr1  | 1549229  | 1551011 -  | 3  | 1685 | 6.26  |
| LOC_Os08g34210.1 | aldehyde dehydrogenase, putative, expressed                                               | Chr8  | 21445787 | 21450833 + | 9  | 2311 | 7.18  |
| LOC_Os09g10274.1 | expressed protein                                                                         | Chr9  | 5598644  | 5599857 +  | 3  | 814  | -6.64 |
| LOC_Os01g01350.2 | SNF7 domain containing protein, putative, expressed                                       | Chr1  | 170712   | 173434 -   | 5  | 1734 | 6.12  |
| LOC_Os07g39510.2 | yippee zinc-binding protein, putative, expressed                                          | Chr7  | 23673057 | 23675107 + | 2  | 993  | 5.58  |
| LOC_Os05g37450.1 | starch binding domain containing protein, putative, expressed                             | Chr5  | 21914659 | 21917380 - | 5  | 2039 | 4.94  |
| LOC_Os02g53830.1 | MTD1, putative, expressed                                                                 | Chr2  | 32965719 | 32968767 + | 2  | 1327 | 6.10  |
| LOC_Os01g55360.4 | phosphatidate cytidyltransferase, putative, expressed                                     | Chr1  | 31873313 | 31877607 - | 8  | 1547 | 3.96  |
| LOC_Os01g74410.1 | MYB family transcription factor, putative, expressed                                      | Chr1  | 43096401 | 43097974 + | 2  | 1427 | -6.67 |
| LOC_Os01g45750.1 | bile acid sodium symporter family protein, putative, expressed                            | Chr1  | 25973522 | 25980440 + | 13 | 2388 | 6.48  |
| LOC_Os04g40420.1 | SWIRM domain containing protein, expressed                                                | Chr4  | 24021401 | 24026205 + | 7  | 2661 | 5.99  |
| LOC_Os01g37260.1 | OsFBX14 - F-box domain containing protein, expressed                                      | Chr1  | 20805805 | 20810166 + | 5  | 1979 | 6.23  |
| LOC_Os01g37260.2 | OsFBX14 - F-box domain containing protein, expressed                                      | Chr1  | 20805790 | 20810162 + | 5  | 1981 | 6.23  |
| LOC_Os03g43390.4 | F-box/LRR domain containing protein, putative, expressed                                  | Chr3  | 24189817 | 24197398 + | 12 | 2553 | 4.36  |
| LOC_Os08g38910.2 | caffeoyl-CoA O-methyltransferase, putative, expressed                                     | Chr8  | 24592945 | 24594866 - | 4  | 1619 | 5.49  |
| LOC_Os04g48140.1 | methyltransferase, putative, expressed                                                    | Chr4  | 28645797 | 28649459 - | 7  | 1985 | 4.84  |
| LOC_Os08g06100.1 | O-methyltransferase, putative, expressed                                                  | Chr8  | 3337751  | 3340959 -  | 2  | 1582 | -4.90 |
| LOC_Os03g60920.1 | Methyltransferase small domain containing protein, expressed                              | Chr3  | 34614571 | 34616975 + | 2  | 1495 | 4.60  |
| LOC_Os01g66030.2 | OsMADS2 - MADS-box family gene with MIKCC type-box, expressed                             | Chr1  | 38320785 | 38324074 - | 7  | 2006 | 5.09  |
| LOC_Os02g26800.1 | expressed protein                                                                         | Chr2  | 15729105 | 15732537 + | 13 | 2927 | 6.74  |
| LOC_Os04g58490.1 | expressed protein                                                                         | Chr4  | 34790785 | 34791388 - | 3  | 321  | 3.83  |
| LOC_Os01g51754.2 | alpha-amylase precursor, putative, expressed                                              | Chr1  | 29760719 | 29770037 + | 11 | 4622 | 7.25  |
| LOC_Os02g49840.1 | OsMADS57 - MADS-box family gene with MIKCC type-box, expressed                            | Chr2  | 30456666 | 30462759 + | 8  | 1640 | 7.10  |
| LOC_Os01g66030.1 | OsMADS2 - MADS-box family gene with MIKCC type-box, expressed                             | Chr1  | 38320785 | 38324074 - | 7  | 2019 | 5.09  |
| LOC_Os04g49990.2 | AT hook motif domain containing protein, expressed                                        | Chr4  | 29814033 | 29818148 - | 5  | 2025 | 6.70  |
| LOC_Os03g20860.1 | expressed protein                                                                         | Chr3  | 11808351 | 11813203 - | 8  | 1430 | 5.79  |
| LOC_Os08g26700.1 | expressed protein                                                                         | Chr8  | 16238583 | 16240262 - | 2  | 1305 | 4.38  |
| LOC_Os02g49840.4 | OsMADS57 - MADS-box family gene with MIKCC type-box, expressed                            | Chr2  | 30456666 | 30462759 + | 8  | 1634 | 7.10  |

|                  |                                                                                   |       |          |            |    |      |       |
|------------------|-----------------------------------------------------------------------------------|-------|----------|------------|----|------|-------|
| LOC_Os11g05130.1 | PHD-finger family protein, expressed                                              | Chr11 | 2247706  | 2256169 -  | 10 | 6872 | 4.57  |
| LOC_Os08g19374.1 | expressed protein                                                                 | Chr8  | 11587793 | 11590913 + | 3  | 2328 | 5.41  |
| LOC_Os02g09790.1 | disease resistance protein RPM1, putative, expressed                              | Chr2  | 5048656  | 5052503 -  | 1  | 3880 | 6.12  |
| LOC_Os07g06080.1 | FAD dependent oxidoreductase domain containing protein, expressed                 | Chr7  | 2945227  | 2947295 +  | 2  | 2040 | 5.09  |
| LOC_Os04g44590.5 | expressed protein                                                                 | Chr4  | 26387566 | 26391274 + | 3  | 825  | 4.24  |
| LOC_Os12g22090.1 | expressed protein                                                                 | Chr12 | 12425383 | 12432769 + | 7  | 3416 | 3.74  |
| LOC_Os07g31270.1 | cupin 2, conserved barrel domain protein, putative, expressed                     | Chr7  | 18509977 | 18515210 + | 12 | 1929 | 5.37  |
| LOC_Os07g18720.1 | tetratricopeptide repeat containing protein, putative, expressed                  | Chr7  | 11064790 | 11076993 + | 18 | 2420 | 5.21  |
| LOC_Os04g54820.2 | programmed cell death 2 C-terminal domain-containing protein, putative, expressed | Chr4  | 32600309 | 32603388 + | 6  | 2225 | 5.37  |
| LOC_Os12g40450.1 | biotin--protein ligase, putative, expressed                                       | Chr12 | 25029774 | 25032330 - | 4  | 1789 | 5.26  |
| LOC_Os01g61670.2 | ureidoglycolate hydrolase, putative, expressed                                    | Chr1  | 35682313 | 35685757 + | 3  | 1590 | 4.31  |
| LOC_Os12g16410.1 | isoflavone reductase, putative, expressed                                         | Chr12 | 9397034  | 9400411 -  | 4  | 1383 | 6.38  |
| LOC_Os02g45120.2 | expressed protein                                                                 | Chr2  | 27369109 | 27371822 + | 4  | 1088 | 4.73  |
| LOC_Os09g26820.1 | exo70 exocyst complex subunit, putative, expressed                                | Chr9  | 16294642 | 16297229 + | 1  | 2620 | 4.37  |
| LOC_Os12g33100.1 | guanylate kinase, putative, expressed                                             | Chr12 | 20028748 | 20032871 - | 11 | 2298 | -5.95 |
| LOC_Os02g39950.1 | EF hand family protein, putative, expressed                                       | Chr2  | 24158477 | 24163085 + | 9  | 1957 | 6.23  |
| LOC_Os05g04510.2 | S-adenosylmethionine synthetase, putative, expressed                              | Chr5  | 2089056  | 2092066 +  | 2  | 1746 | -5.54 |
| LOC_Os06g22660.1 | EMB1303, putative, expressed                                                      | Chr6  | 13177537 | 13181742 + | 5  | 1040 | 4.41  |
| LOC_Os06g22660.2 | EMB1303, putative, expressed                                                      | Chr6  | 13177537 | 13181742 + | 5  | 1016 | 4.41  |
| LOC_Os01g64670.2 | soluble inorganic pyrophosphatase, putative, expressed                            | Chr1  | 37521959 | 37524040 - | 9  | 1348 | 5.01  |
| LOC_Os03g64140.1 | expressed protein                                                                 | Chr3  | 36243053 | 36245080 - | 7  | 1476 | -4.12 |
| LOC_Os03g54063.2 | expressed protein                                                                 | Chr3  | 30994449 | 30996882 - | 3  | 1295 | 7.00  |
| LOC_Os02g51160.1 | hydrolase, acting on carbon-nitrogen, putative, expressed                         | Chr2  | 31303466 | 31306550 + | 6  | 1411 | 4.53  |
| LOC_Os02g38160.1 | glycosyl transferase family 17 protein, putative, expressed                       | Chr2  | 23083106 | 23086442 - | 2  | 2153 | 4.68  |
| LOC_Os07g16960.1 | glycosyl transferase, group 1 domain containing protein, expressed                | Chr7  | 9976519  | 9980344 -  | 9  | 2370 | 5.73  |
| LOC_Os09g32250.1 | DNA repair ATPase-related, putative, expressed                                    | Chr9  | 19244915 | 19250324 + | 15 | 2384 | 5.78  |
| LOC_Os06g49920.1 | expressed protein                                                                 | Chr6  | 30221418 | 30223862 + | 4  | 2076 | 5.91  |
| LOC_Os02g35170.2 | uncharacterized oxidoreductase yoxD, putative, expressed                          | Chr2  | 21122299 | 21125134 + | 4  | 2241 | 6.55  |
| LOC_Os01g34860.1 | expressed protein                                                                 | Chr1  | 19245153 | 19248201 - | 3  | 2492 | 6.19  |
| LOC_Os08g44015.1 | growth regulator related protein, putative, expressed                             | Chr8  | 27708166 | 27712650 + | 10 | 2584 | 6.14  |
| LOC_Os02g49840.2 | OsMADS57 - MADS-box family gene with MIKCC type-box, expressed                    | Chr2  | 30456666 | 30462733 + | 7  | 1543 | 6.96  |
| LOC_Os01g39810.1 | Alg9-like mannosyltransferase protein, putative, expressed                        | Chr1  | 22450498 | 22456233 + | 10 | 3429 | 4.36  |
| LOC_Os02g56020.2 | methyltransferase, putative, expressed                                            | Chr2  | 34296967 | 34299423 + | 7  | 1311 | 7.21  |
| LOC_Os01g19490.1 | pentatricopeptide, putative, expressed                                            | Chr1  | 11064694 | 11068774 - | 2  | 2442 | 5.28  |
| LOC_Os04g57150.2 | tafazzin, putative, expressed                                                     | Chr4  | 34054300 | 34058149 - | 5  | 1396 | 5.35  |
| LOC_Os01g31680.1 | uncharacterized protein sl0194, putative, expressed                               | Chr1  | 17341202 | 17346405 - | 4  | 1559 | 7.12  |
| LOC_Os04g23820.1 | methionyl-tRNA synthetase, putative, expressed                                    | Chr4  | 13607957 | 13610433 + | 3  | 1355 | 4.47  |
| LOC_Os02g56480.1 | PB1 domain containing protein, expressed                                          | Chr2  | 34573952 | 34576173 - | 1  | 2254 | 5.77  |
| LOC_Os12g12300.1 | EDM2, putative, expressed                                                         | Chr12 | 6760060  | 6763033 -  | 7  | 1749 | 5.32  |
| LOC_Os12g16480.1 | expressed protein                                                                 | Chr12 | 9435934  | 9438197 -  | 4  | 848  | 5.79  |
| LOC_Os12g04590.2 | zinc finger, C3HC4 type domain containing protein, expressed                      | Chr12 | 1938983  | 1941122 -  | 3  | 1687 | 6.01  |
| LOC_Os12g42860.1 | 2-aminoethanethiol dioxygenase, putative, expressed                               | Chr12 | 26629915 | 26632625 - | 5  | 1763 | 6.00  |
| LOC_Os01g19140.1 | O-sialoglycoprotein endopeptidase, putative, expressed                            | Chr1  | 10813997 | 10818530 - | 10 | 1625 | 5.11  |
| LOC_Os02g50680.1 | AAA-type ATPase family protein, putative, expressed                               | Chr2  | 30958609 | 30965278 - | 13 | 2829 | 7.46  |
| LOC_Os04g21660.1 | AAA-type ATPase family protein, putative, expressed                               | Chr4  | 12252480 | 12258695 - | 10 | 1850 | 5.92  |

|                  |                                                                                       |       |          |            |    |      |       |
|------------------|---------------------------------------------------------------------------------------|-------|----------|------------|----|------|-------|
| LOC_Os04g57150.1 | tafazzin, putative, expressed                                                         | Chr4  | 34054300 | 34058149 - | 5  | 1406 | 5.35  |
| LOC_Os03g54063.3 | expressed protein                                                                     | Chr3  | 30994449 | 30996825 - | 3  | 1341 | 7.00  |
| LOC_Os09g29520.1 | OsWAK81 - OsWAK receptor-like cytoplasmic kinase OsWAK-RLCK, expressed                | Chr9  | 17961169 | 17962785 - | 1  | 1649 | 4.92  |
| LOC_Os02g47800.1 | monodehydroascorbate reductase, putative, expressed                                   | Chr2  | 29229964 | 29234195 - | 7  | 2047 | 5.83  |
| LOC_Os08g12780.3 | chloroplast envelope membrane protein, putative, expressed                            | Chr8  | 7568534  | 7574295 -  | 9  | 2776 | 5.64  |
| LOC_Os03g17690.1 | OsAPx1 - Cytosolic Ascorbate Peroxidase encoding gene 1-8, expressed                  | Chr3  | 9843327  | 9846747 +  | 9  | 1447 | 5.72  |
| LOC_Os04g54200.2 | diacylglycerol kinase, putative, expressed                                            | Chr4  | 32286661 | 32291459 + | 9  | 1816 | 6.90  |
| LOC_Os08g12780.2 | chloroplast envelope membrane protein, putative, expressed                            | Chr8  | 7568534  | 7574295 -  | 9  | 2781 | 5.64  |
| LOC_Os06g46930.1 | ribosomal protein L24, putative, expressed                                            | Chr6  | 28472587 | 28474784 - | 4  | 1029 | 5.67  |
| LOC_Os07g45210.1 | expressed protein                                                                     | Chr7  | 26984201 | 26988333 + | 8  | 1677 | 5.19  |
| LOC_Os06g12220.1 | HVA22, putative, expressed                                                            | Chr6  | 6559753  | 6563394 -  | 6  | 1360 | 5.14  |
| LOC_Os05g45350.1 | dnaJ domain containing protein, expressed                                             | Chr5  | 26311382 | 26314173 - | 9  | 1663 | 5.47  |
| LOC_Os04g23890.2 | AGC_PVPK_like_kin82y.10 - ACG kinases include homologs to PKA, PKG and PKC, expressed | Chr4  | 13641585 | 13654501 - | 23 | 3984 | 4.45  |
| LOC_Os01g14790.1 | expressed protein                                                                     | Chr1  | 8269588  | 8272646 +  | 3  | 1063 | 4.39  |
| LOC_Os05g45350.3 | dnaJ domain containing protein, expressed                                             | Chr5  | 26311383 | 26314173 - | 9  | 1652 | 5.47  |
| LOC_Os05g19974.1 | endonuclease/exonuclease/phosphatase family protein, putative, expressed              | Chr5  | 11671479 | 11681136 + | 7  | 1736 | 5.70  |
| LOC_Os09g39390.1 | oxidoreductase, aldo/keto reductase family protein, putative, expressed               | Chr9  | 22649087 | 22652085 + | 9  | 1776 | 5.82  |
| LOC_Os01g31680.2 | uncharacterized protein sll0194, putative, expressed                                  | Chr1  | 17341202 | 17346405 - | 4  | 1529 | 7.12  |
| LOC_Os04g50740.1 | ara54-like RING finger protein, putative, expressed                                   | Chr4  | 30016919 | 30021073 + | 7  | 2263 | 4.98  |
| LOC_Os07g06090.1 | expressed protein                                                                     | Chr7  | 2946126  | 2949178 -  | 4  | 2013 | 5.13  |
| LOC_Os08g01070.1 | retrotransposon protein, putative, unclassified, expressed                            | Chr8  | 54040    | 58330 +    | 6  | 3646 | 4.75  |
| LOC_Os01g42510.2 | expressed protein                                                                     | Chr1  | 24168245 | 24171441 - | 5  | 830  | 5.14  |
| LOC_Os03g07960.1 | expressed protein                                                                     | Chr3  | 4069589  | 4072442 -  | 7  | 1270 | 4.39  |
| LOC_Os04g47530.1 | transmembrane protein, putative, expressed                                            | Chr4  | 28192112 | 28196154 - | 7  | 2125 | 5.80  |
| LOC_Os02g37060.1 | photosystem II 5 kDa protein, chloroplast precursor, putative, expressed              | Chr2  | 22390365 | 22391131 + | 1  | 799  | 4.05  |
| LOC_Os02g57470.1 | tetratricopeptide repeat containing protein, putative, expressed                      | Chr2  | 35218310 | 35221098 - | 2  | 2263 | 5.00  |
| LOC_Os03g49730.1 | zinc finger protein, putative, expressed                                              | Chr3  | 28308340 | 28312269 - | 14 | 2309 | 6.45  |
| LOC_Os05g09630.2 | homeobox domain containing protein, expressed                                         | Chr5  | 5441429  | 5445212 +  | 8  | 2605 | 5.87  |
| LOC_Os03g49730.2 | zinc finger protein, putative, expressed                                              | Chr3  | 28308340 | 28312269 - | 14 | 2306 | 6.45  |
| LOC_Os06g47210.1 | oligopeptidase, putative, expressed                                                   | Chr6  | 28620993 | 28628006 + | 17 | 3271 | 6.03  |
| LOC_Os03g08680.1 | pentatricopeptide, putative, expressed                                                | Chr3  | 4472456  | 4476109 -  | 6  | 2076 | 6.02  |
| LOC_Os07g45210.2 | expressed protein                                                                     | Chr7  | 26984185 | 26988352 + | 6  | 2514 | 5.32  |
| LOC_Os01g07920.1 | prolyl 4-hydroxylase, putative, expressed                                             | Chr1  | 3827039  | 3830326 -  | 7  | 1413 | 4.14  |
| LOC_Os03g08700.1 | expressed protein                                                                     | Chr3  | 4482882  | 4489522 +  | 10 | 4292 | 4.87  |
| LOC_Os04g04010.1 | expressed protein                                                                     | Chr4  | 1848746  | 1851594 -  | 3  | 1943 | 5.51  |
| LOC_Os12g05330.1 | protein of unknown function containing protein, expressed                             | Chr12 | 2395803  | 2397716 -  | 2  | 1588 | 4.52  |
| LOC_Os06g28740.1 | expressed protein                                                                     | Chr6  | 16363079 | 16366463 - | 7  | 1463 | 5.05  |
| LOC_Os12g42300.1 | potassium efflux antiporter protein, putative, expressed                              | Chr12 | 26299853 | 26306151 - | 18 | 3899 | 4.90  |
| LOC_Os12g42860.2 | 2-aminoethanethiol dioxygenase, putative, expressed                                   | Chr12 | 26629915 | 26632625 - | 4  | 1828 | 6.02  |
| LOC_Os04g43040.1 | expressed protein                                                                     | Chr4  | 25468585 | 25471556 - | 6  | 1466 | 4.90  |
| LOC_Os01g68390.1 | Uncharacterized ACR, COG1565 containing protein, putative, expressed                  | Chr1  | 39737106 | 39741764 - | 13 | 2105 | 4.85  |
| LOC_Os04g57160.1 | flavonol synthase/flavanone 3-hydroxylase, putative, expressed                        | Chr4  | 34060040 | 34063474 + | 4  | 1506 | -5.06 |
| LOC_Os07g37760.2 | lysine ketoglutarate reductase trans-splicing related 1, putative, expressed          | Chr7  | 22648343 | 22654350 - | 15 | 2114 | 5.11  |
| LOC_Os03g04600.1 | expressed protein                                                                     | Chr3  | 2145763  | 2150672 -  | 3  | 3444 | -3.80 |
| LOC_Os06g03690.1 | RNA recognition motif containing protein, putative, expressed                         | Chr6  | 1455368  | 1458610 +  | 7  | 1450 | 6.04  |



|                  |                                                                           |       |          |            |    |      |       |
|------------------|---------------------------------------------------------------------------|-------|----------|------------|----|------|-------|
| LOC_Os12g10540.1 | OsMADS13 - MADS-box family gene with MIKCC type-box, expressed            | Chr12 | 5585203  | 5590285 +  | 8  | 1464 | 6.21  |
| LOC_Os11g17610.1 | expressed protein                                                         | Chr11 | 9815907  | 9820235 -  | 11 | 1743 | 5.27  |
| LOC_Os11g05130.2 | PHD-finger family protein, expressed                                      | Chr11 | 2247706  | 2255775 -  | 10 | 6466 | 4.57  |
| LOC_Os05g19974.2 | endonuclease/exonuclease/phosphatase family protein, putative, expressed  | Chr5  | 11671479 | 11681136 + | 7  | 1736 | 5.71  |
| LOC_Os07g28790.1 | PAP fibrillin family domain containing protein, expressed                 | Chr7  | 16857192 | 16862643 + | 11 | 1879 | 4.80  |
| LOC_Os08g08580.1 | retrotransposon protein, putative, Ty3-gypsy subclass, expressed          | Chr8  | 4958467  | 4962376 -  | 4  | 953  | 5.24  |
| LOC_Os05g34500.1 | expressed protein                                                         | Chr5  | 20455499 | 20456338 + | 1  | 872  | -4.90 |
| LOC_Os09g36244.1 | expressed protein                                                         | Chr9  | 20906765 | 20908479 + | 4  | 900  | 5.06  |
| LOC_Os06g41060.1 | helix-loop-helix DNA-binding, putative, expressed                         | Chr6  | 24522165 | 24527832 - | 6  | 1271 | 5.06  |
| LOC_Os08g04140.1 | X8 domain containing protein, expressed                                   | Chr8  | 2012000  | 2013407 +  | 4  | 1131 | 4.32  |
| LOC_Os10g27060.1 | SET domain protein 123, putative, expressed                               | Chr10 | 14261166 | 14263875 - | 8  | 1550 | 5.20  |
| LOC_Os08g04140.2 | X8 domain containing protein, expressed                                   | Chr8  | 2012001  | 2013407 +  | 4  | 1127 | 4.32  |
| LOC_Os07g29390.1 | peptidyl-prolyl cis-trans isomerase, putative, expressed                  | Chr7  | 17254909 | 17260675 - | 8  | 1654 | 5.48  |
| LOC_Os03g56830.2 | ad-003, putative, expressed                                               | Chr3  | 32381178 | 32383791 - | 8  | 1492 | 4.57  |
| LOC_Os05g28950.2 | CAAX amino terminal protease family protein, putative, expressed          | Chr5  | 16972939 | 16975971 + | 7  | 1844 | 5.26  |
| LOC_Os09g09320.1 | nuclear transport factor, putative, expressed                             | Chr9  | 4988974  | 4991687 +  | 3  | 1499 | 4.87  |
| LOC_Os01g68800.1 | expressed protein                                                         | Chr1  | 39958548 | 39959622 + | 3  | 883  | 5.52  |
| LOC_Os11g06370.1 | expressed protein                                                         | Chr11 | 3063521  | 3066036 -  | 2  | 1582 | 6.29  |
| LOC_Os10g41650.1 | OsFBX392 - F-box domain containing protein, expressed                     | Chr10 | 22425627 | 22427804 + | 2  | 1797 | 6.07  |
| LOC_Os07g46430.2 | expressed protein                                                         | Chr7  | 27701512 | 27705190 - | 8  | 1698 | 5.44  |
| LOC_Os08g26270.1 | expressed protein                                                         | Chr8  | 16015231 | 16015586 - | 2  | 328  | 3.96  |
| LOC_Os04g45280.5 | histidine triad family protein, putative, expressed                       | Chr4  | 26752194 | 26757287 - | 6  | 1205 | 4.32  |
| LOC_Os08g01350.2 | transmembrane protein 18, putative, expressed                             | Chr8  | 222483   | 225362 -   | 3  | 1287 | 4.75  |
| LOC_Os02g30840.2 | RNA pseudouridine synthase, putative, expressed                           | Chr2  | 18385206 | 18390663 + | 11 | 2127 | 6.09  |
| LOC_Os07g48640.1 | short-chain dehydrogenase/reductase, putative, expressed                  | Chr7  | 29121890 | 29124961 + | 6  | 1524 | 7.65  |
| LOC_Os07g29390.3 | peptidyl-prolyl cis-trans isomerase, putative, expressed                  | Chr7  | 17254909 | 17260675 - | 8  | 1643 | 5.48  |
| LOC_Os01g53720.2 | expressed protein                                                         | Chr1  | 30879000 | 30886338 + | 12 | 3588 | -4.01 |
| LOC_Os09g07480.1 | membrane associated DUF588 domain containing protein, putative, expressed | Chr9  | 3745683  | 3749470 +  | 3  | 1344 | 4.89  |
| LOC_Os03g27003.2 | expressed protein                                                         | Chr3  | 15453264 | 15456412 + | 2  | 1406 | 5.03  |
| LOC_Os01g48920.1 | beclin-1, putative, expressed                                             | Chr1  | 28070679 | 28076428 - | 10 | 2474 | 4.93  |
| LOC_Os08g32880.1 | disease resistance protein RPM1, putative, expressed                      | Chr8  | 20389564 | 20392287 + | 1  | 2756 | 7.40  |
| LOC_Os09g15790.1 | ras-related protein, putative, expressed                                  | Chr9  | 9643529  | 9646172 -  | 2  | 1679 | 4.17  |
| LOC_Os06g04040.3 | WD domain, G-beta repeat domain containing protein, expressed             | Chr6  | 1648595  | 1651506 +  | 7  | 1434 | 5.75  |
| LOC_Os09g36370.1 | ER lumen protein retaining receptor containing protein, expressed         | Chr9  | 20988450 | 20994466 + | 8  | 1855 | 6.70  |
| LOC_Os02g30840.1 | RNA pseudouridine synthase, putative, expressed                           | Chr2  | 18385206 | 18390663 + | 12 | 2028 | 6.09  |
| LOC_Os07g48640.2 | short-chain dehydrogenase/reductase, putative, expressed                  | Chr7  | 29121756 | 29124961 + | 7  | 1598 | 7.64  |
| LOC_Os06g39748.1 | expressed protein                                                         | Chr6  | 23585866 | 23586186 - | 1  | 353  | 4.89  |
| LOC_Os08g39120.1 | expressed protein                                                         | Chr8  | 24712425 | 24715665 + | 2  | 2446 | 5.52  |
| LOC_Os03g45400.1 | antitermination NusB domain-containing protein, putative, expressed       | Chr3  | 25627102 | 25631164 + | 7  | 1871 | 5.87  |
| LOC_Os01g37080.1 | retrotransposon protein, putative, unclassified, expressed                | Chr1  | 20691942 | 20696077 - | 2  | 4021 | 3.50  |
| LOC_Os11g48020.1 | fatty acid hydroxylase, putative, expressed                               | Chr11 | 28953907 | 28957199 - | 7  | 1518 | 7.73  |
| LOC_Os01g74190.1 | radical SAM enzyme, putative, expressed                                   | Chr1  | 42977145 | 42979816 - | 10 | 1853 | 4.67  |
| LOC_Os07g38490.1 | GDP-fucose protein-O-fucosyltransferase 2, putative, expressed            | Chr7  | 23115846 | 23119820 + | 3  | 2078 | 4.82  |
| LOC_Os08g07290.2 | HEAT repeat family protein, putative, expressed                           | Chr8  | 4069808  | 4076114 -  | 4  | 5218 | 6.52  |
| LOC_Os04g54200.1 | diacylglycerol kinase, putative, expressed                                | Chr4  | 32286661 | 32291459 + | 13 | 2406 | 6.00  |

|                  |                                                                               |       |          |            |    |      |      |
|------------------|-------------------------------------------------------------------------------|-------|----------|------------|----|------|------|
| LOC_Os02g32660.2 | 1,4-alpha-glucan-branching enzyme, chloroplast precursor, putative, expressed | Chr2  | 19358471 | 19367127 - | 16 | 2780 | 5.47 |
| LOC_Os12g33230.1 | OsFBL60 - F-box domain and LRR containing protein, expressed                  | Chr12 | 20100274 | 20103255 + | 3  | 2273 | 4.87 |
| LOC_Os05g35440.1 | serine hydroxymethyltransferase, mitochondrial precursor, putative, expressed | Chr5  | 21050901 | 21054702 - | 4  | 2321 | 5.47 |
| LOC_Os02g56219.1 | acetyltransferase, GNAT family, putative, expressed                           | Chr2  | 34382284 | 34388181 + | 3  | 1384 | 4.55 |
| LOC_Os12g02810.1 | protein kinase domain containing protein, expressed                           | Chr12 | 991513   | 996183 -   | 6  | 1972 | 4.72 |
| LOC_Os06g37010.2 | metal cation transporter, putative, expressed                                 | Chr6  | 21824375 | 21826735 + | 5  | 1869 | 4.67 |
| LOC_Os02g04420.2 | expressed protein                                                             | Chr2  | 1947602  | 1949400 -  | 2  | 1762 | 4.57 |
| LOC_Os07g27150.3 | trafficking protein particle complex subunit 4, putative, expressed           | Chr7  | 15751122 | 15755972 + | 4  | 1129 | 4.83 |
| LOC_Os05g34240.1 | hAT dimerisation domain containing protein, expressed                         | Chr5  | 20267699 | 20271147 - | 7  | 2821 | 6.02 |
| LOC_Os05g25974.2 | expressed protein                                                             | Chr5  | 15092220 | 15095127 - | 4  | 2718 | 5.38 |
| LOC_Os03g21090.1 | auxin-independent growth promoter protein, putative, expressed                | Chr3  | 12008191 | 12012504 - | 10 | 2269 | 5.46 |
| LOC_Os04g33840.1 | pentatricopeptide, putative, expressed                                        | Chr4  | 20499421 | 20501058 + | 1  | 1670 | 6.28 |
| LOC_Os01g56660.1 | expressed protein                                                             | Chr1  | 32693760 | 32696486 + | 4  | 2336 | 5.09 |
| LOC_Os04g31040.1 | violaxanthin de-epoxidase, putative, expressed                                | Chr4  | 18551238 | 18553801 - | 6  | 2069 | 4.84 |
| LOC_Os08g45160.1 | TENA/THI-4 family protein, putative, expressed                                | Chr8  | 28347237 | 28351751 - | 6  | 3315 | 5.07 |
| LOC_Os03g61330.1 | fumarylacetoacetase, putative, expressed                                      | Chr3  | 34817125 | 34820371 - | 8  | 1365 | 5.58 |
| LOC_Os07g47490.4 | OsGH3.11 - Probable indole-3-acetic acid-amido synthetase, expressed          | Chr7  | 28391698 | 28400307 - | 4  | 2285 | 4.88 |
| LOC_Os07g37760.1 | lysine ketoglutarate reductase trans-splicing related 1, putative, expressed  | Chr7  | 22648343 | 22654350 - | 16 | 2246 | 5.11 |
| LOC_Os02g04670.1 | glucan endo-1,3-beta-glucosidase precursor, putative, expressed               | Chr2  | 2096202  | 2101457 +  | 2  | 3589 | 4.51 |
| LOC_Os02g13890.2 | FYVE zinc finger domain containing protein, expressed                         | Chr2  | 7542594  | 7544430 +  | 2  | 1472 | 5.06 |
| LOC_Os08g34210.2 | aldehyde dehydrogenase, putative, expressed                                   | Chr8  | 21445787 | 21450833 + | 8  | 2746 | 7.19 |
| LOC_Os06g05520.1 | OsMKK1 - putative MAPKK based on amino acid sequence homology, expressed      | Chr6  | 2498847  | 2502901 -  | 9  | 1843 | 5.03 |
| LOC_Os08g01600.1 | polygalacturonase, putative, expressed                                        | Chr8  | 357115   | 360795 +   | 5  | 1848 | 7.37 |
| LOC_Os01g72420.1 | C2 domain containing protein, putative, expressed                             | Chr1  | 41999585 | 42002803 - | 3  | 2682 | 3.86 |
| LOC_Os12g25800.1 | expressed protein                                                             | Chr12 | 14963121 | 14963695 + | 2  | 331  | 4.61 |
| LOC_Os01g10130.1 | RNA-dependent RNA polymerase, putative, expressed                             | Chr1  | 5288135  | 5293325 -  | 8  | 1965 | 4.66 |
| LOC_Os01g15850.1 | expressed protein                                                             | Chr1  | 8925072  | 8929646 +  | 7  | 1783 | 4.98 |
| LOC_Os05g34240.3 | hAT dimerisation domain containing protein, expressed                         | Chr5  | 20267699 | 20271147 - | 6  | 2888 | 6.02 |
| LOC_Os12g05110.1 | pyruvate kinase, putative, expressed                                          | Chr12 | 2245322  | 2249836 -  | 16 | 2720 | 4.33 |
| LOC_Os05g41540.1 | bZIP transcription factor domain containing protein, expressed                | Chr5  | 24321000 | 24322781 - | 1  | 1814 | 4.58 |
| LOC_Os03g34040.2 | ribosomal protein, putative, expressed                                        | Chr3  | 19412908 | 19417098 - | 3  | 1392 | 5.26 |
| LOC_Os05g19630.1 | peptide chain release factor protein, putative, expressed                     | Chr5  | 11436297 | 11439153 - | 10 | 1748 | 6.74 |
| LOC_Os02g01020.2 | expressed protein                                                             | Chr2  | 10568    | 13896 -    | 3  | 3214 | 6.11 |
| LOC_Os05g05260.1 | helicase, putative, expressed                                                 | Chr5  | 2584798  | 2590120 -  | 11 | 3069 | 4.81 |
| LOC_Os03g63010.2 | plastid terminal oxidase, putative, expressed                                 | Chr3  | 35625601 | 35629619 + | 6  | 1710 | 4.39 |
| LOC_Os11g03720.1 | expressed protein                                                             | Chr11 | 1445411  | 1448908 +  | 6  | 624  | 4.03 |
| LOC_Os05g34240.2 | hAT dimerisation domain containing protein, expressed                         | Chr5  | 20267699 | 20271119 - | 5  | 2909 | 6.02 |
| LOC_Os03g29730.1 | expressed protein                                                             | Chr3  | 16937580 | 16940919 - | 9  | 1566 | 5.68 |
| LOC_Os12g02750.1 | expressed protein                                                             | Chr12 | 971331   | 975926 +   | 5  | 1837 | 4.07 |
| LOC_Os07g06660.2 | glyoxalase family protein, putative, expressed                                | Chr7  | 3245342  | 3247308 -  | 3  | 1030 | 4.65 |
| LOC_Os04g48230.2 | dehydration response related protein, putative, expressed                     | Chr4  | 28723924 | 28727647 - | 6  | 2644 | 4.52 |
| LOC_Os11g06290.1 | expressed protein                                                             | Chr11 | 3019550  | 3022478 +  | 2  | 2170 | 4.78 |
| LOC_Os06g29804.2 | expressed protein                                                             | Chr6  | 17156034 | 17159871 + | 3  | 1048 | 6.82 |
| LOC_Os03g05040.1 | expressed protein                                                             | Chr3  | 2450608  | 2455276 -  | 7  | 3041 | 4.97 |
| LOC_Os10g15164.1 | expressed protein                                                             | Chr10 | 8070371  | 8074813 +  | 6  | 2811 | 6.99 |

|                  |                                                                                    |       |          |          |   |    |      |       |
|------------------|------------------------------------------------------------------------------------|-------|----------|----------|---|----|------|-------|
| LOC_Os03g62680.1 | expressed protein                                                                  | Chr3  | 35470284 | 35473955 | - | 9  | 1818 | 6.15  |
| LOC_Os04g58504.1 | choline transporter-related, putative, expressed                                   | Chr4  | 34791847 | 34800755 | - | 10 | 2783 | 7.25  |
| LOC_Os12g37360.1 | miro, putative, expressed                                                          | Chr12 | 22939746 | 22943722 | - | 3  | 1127 | 4.46  |
| LOC_Os11g02090.1 | expressed protein                                                                  | Chr11 | 566237   | 568625   | + | 4  | 1057 | 4.12  |
| LOC_Os03g17170.1 | zinc finger, C3HC4 type domain containing protein, expressed                       | Chr3  | 9553185  | 9555231  | + | 2  | 1364 | 4.62  |
| LOC_Os06g06940.1 | S-locus-like receptor protein kinase, putative, expressed                          | Chr6  | 3294197  | 3296358  | - | 2  | 2143 | 6.48  |
| LOC_Os10g27060.2 | SET domain protein 123, putative, expressed                                        | Chr10 | 14261167 | 14263875 | - | 7  | 1651 | 5.20  |
| LOC_Os06g37010.1 | metal cation transporter, putative, expressed                                      | Chr6  | 21824535 | 21826735 | + | 5  | 1709 | 4.54  |
| LOC_Os01g59560.1 | protein kinase domain containing protein, expressed                                | Chr1  | 34437262 | 34444377 | - | 9  | 2970 | 5.36  |
| LOC_Os05g01820.1 | cytochrome b5-like Heme/Steroid binding domain containing protein, expressed       | Chr5  | 492255   | 494332   | + | 3  | 1105 | -4.99 |
| LOC_Os11g06800.1 | retrotransposon protein, putative, unclassified, expressed                         | Chr11 | 3330523  | 3331395  | + | 2  | 775  | 3.94  |
| LOC_Os11g02305.1 | expressed protein                                                                  | Chr11 | 655459   | 660185   | - | 3  | 1965 | -8.49 |
| LOC_Os12g43840.2 | ankyrin repeat domain-containing protein, putative, expressed                      | Chr12 | 27213378 | 27219059 | - | 13 | 2292 | 4.87  |
| LOC_Os02g03950.3 | zinc finger, C3HC4 type family protein, expressed                                  | Chr2  | 1680213  | 1685319  | + | 7  | 2336 | 4.58  |
| LOC_Os10g21360.1 | N-dimethylguanosine tRNA methyltransferase, putative, expressed                    | Chr10 | 10932181 | 10939475 | + | 13 | 2738 | 5.18  |
| LOC_Os02g04690.2 | cycloartenol synthase, putative, expressed                                         | Chr2  | 2110921  | 2120419  | - | 21 | 3204 | 3.32  |
| LOC_Os04g31040.3 | violaxanthin de-epoxidase, putative, expressed                                     | Chr4  | 18551243 | 18553801 | - | 5  | 2137 | 4.84  |
| LOC_Os01g56310.1 | radical SAM enzyme, putative, expressed                                            | Chr1  | 32440171 | 32443318 | + | 7  | 1618 | 5.59  |
| LOC_Os04g54820.1 | programmed cell death 2 C-terminal domain-containing protein, putative, expressed  | Chr4  | 32600309 | 32603388 | + | 7  | 2026 | 5.79  |
| LOC_Os06g03910.1 | hydrolase, NUDIX family, domain containing protein, expressed                      | Chr6  | 1574484  | 1577176  | - | 6  | 1487 | 4.54  |
| LOC_Os03g20300.2 | glucose-6-phosphate 1-dehydrogenase, chloroplast precursor, putative, expressed    | Chr3  | 11468496 | 11475783 | - | 13 | 3474 | 6.79  |
| LOC_Os10g21360.2 | N-dimethylguanosine tRNA methyltransferase, putative, expressed                    | Chr10 | 10932181 | 10939475 | + | 12 | 2788 | 5.18  |
| LOC_Os11g02090.2 | expressed protein                                                                  | Chr11 | 566237   | 568625   | + | 4  | 1076 | 4.12  |
| LOC_Os12g02390.1 | vacuolar-sorting receptor precursor, putative, expressed                           | Chr12 | 783540   | 788120   | - | 12 | 3010 | 5.15  |
| LOC_Os12g06060.1 | amino acid permease family protein, putative, expressed                            | Chr12 | 2816374  | 2822877  | + | 5  | 1768 | 4.67  |
| LOC_Os01g49380.1 | lipase, putative, expressed                                                        | Chr1  | 28384020 | 28387158 | - | 8  | 1556 | 4.30  |
| LOC_Os01g49380.2 | lipase, putative, expressed                                                        | Chr1  | 28384020 | 28387158 | - | 8  | 1546 | 4.30  |
| LOC_Os01g20120.1 | expressed protein                                                                  | Chr1  | 11426336 | 11430996 | - | 6  | 1894 | 6.26  |
| LOC_Os02g52480.1 | cyclin-dependent kinase inhibitor, putative, expressed                             | Chr2  | 32111311 | 32112949 | + | 4  | 1394 | 4.92  |
| LOC_Os12g07730.1 | SWIRM domain containing protein, expressed                                         | Chr12 | 3879354  | 3885325  | + | 9  | 3258 | 4.72  |
| LOC_Os01g65904.1 | expressed protein                                                                  | Chr1  | 38273297 | 38274818 | + | 1  | 1554 | 4.69  |
| LOC_Os01g15840.1 | PPR repeat containing protein, expressed                                           | Chr1  | 8921590  | 8925372  | - | 1  | 3815 | 5.05  |
| LOC_Os06g29804.1 | expressed protein                                                                  | Chr6  | 17156034 | 17160300 | + | 5  | 1227 | 6.82  |
| LOC_Os06g44270.1 | synthase, putative, expressed                                                      | Chr6  | 26708003 | 26709889 | + | 2  | 1870 | 4.86  |
| LOC_Os06g15620.1 | GASR7 - Gibberellin-regulated GASA/GAST/Snakin family protein precursor, expressed | Chr6  | 8847702  | 8848847  | - | 2  | 1106 | 5.00  |
| LOC_Os04g45280.2 | histidine triad family protein, putative, expressed                                | Chr4  | 26753631 | 26757287 | - | 7  | 1337 | 4.26  |
| LOC_Os02g07250.1 | peptidase, cysteine peptidase active site, putative, expressed                     | Chr2  | 3720874  | 3724570  | - | 7  | 1803 | 5.02  |
| LOC_Os08g01350.1 | transmembrane protein 18, putative, expressed                                      | Chr8  | 222452   | 225362   | - | 4  | 1266 | 4.73  |
| LOC_Os04g45280.4 | histidine triad family protein, putative, expressed                                | Chr4  | 26753631 | 26757285 | - | 7  | 1344 | 4.26  |
| LOC_Os02g56020.1 | methyltransferase, putative, expressed                                             | Chr2  | 34296373 | 34299423 | + | 9  | 1792 | 7.24  |
| LOC_Os02g15160.1 | OsFBX40 - F-box domain containing protein, expressed                               | Chr2  | 8453872  | 8455936  | - | 2  | 1467 | 4.97  |
| LOC_Os09g38980.1 | T-complex protein, putative, expressed                                             | Chr9  | 22382924 | 22387028 | + | 8  | 2643 | 5.87  |
| LOC_Os03g44210.2 | expressed protein                                                                  | Chr3  | 24842043 | 24845659 | - | 3  | 2861 | 5.32  |
| LOC_Os05g03000.1 | inner membrane protein alx, putative, expressed                                    | Chr5  | 1127011  | 1132428  | - | 14 | 2266 | 4.74  |
| LOC_Os02g04100.1 | peptidase, T1 family, putative, expressed                                          | Chr2  | 1784550  | 1788087  | + | 2  | 1264 | 5.61  |

|                  |                                                                                      |       |          |            |    |      |       |
|------------------|--------------------------------------------------------------------------------------|-------|----------|------------|----|------|-------|
| LOC_Os07g27150.2 | trafficking protein particle complex subunit 4, putative, expressed                  | Chr7  | 15751055 | 15755972 + | 4  | 1184 | 4.81  |
| LOC_Os06g46380.1 | rab geranylgeranyl transferase like protein, putative, expressed                     | Chr6  | 28143872 | 28148384 + | 8  | 2759 | 5.03  |
| LOC_Os06g21099.1 | expressed protein                                                                    | Chr6  | 12186508 | 12190658 + | 7  | 1712 | 4.52  |
| LOC_Os06g01050.1 | expressed protein                                                                    | Chr6  | 33589    | 37124 +    | 5  | 613  | 3.94  |
| LOC_Os04g53350.1 | expressed protein                                                                    | Chr4  | 31768908 | 31773173 - | 3  | 2834 | 6.12  |
| LOC_Os02g43740.1 | AGC_PVPK_like_kin82y.6 - ACG kinases include homologs to PKA, PKG and PKC, expressed | Chr2  | 26392963 | 26396720 + | 3  | 3114 | 4.09  |
| LOC_Os09g31300.2 | helix-loop-helix DNA-binding domain containing protein, expressed                    | Chr9  | 18814008 | 18817017 + | 5  | 2266 | 6.70  |
| LOC_Os09g31300.1 | helix-loop-helix DNA-binding domain containing protein, expressed                    | Chr9  | 18814008 | 18817017 + | 5  | 2272 | 6.70  |
| LOC_Os09g19830.1 | histone-lysine N-methyltransferase, putative, expressed                              | Chr9  | 11869807 | 11874417 + | 2  | 3908 | 6.45  |
| LOC_Os02g04690.1 | cycloartenol synthase, putative, expressed                                           | Chr2  | 2110921  | 2120419 -  | 19 | 2978 | 3.30  |
| LOC_Os04g46930.1 | serine racemase, putative, expressed                                                 | Chr4  | 27823815 | 27826571 - | 7  | 1573 | 5.49  |
| LOC_Os02g22580.1 | expressed protein                                                                    | Chr2  | 13467197 | 13467584 - | 3  | 318  | 4.80  |
| LOC_Os01g32130.1 | expressed protein                                                                    | Chr1  | 17583645 | 17586310 + | 5  | 1438 | 5.44  |
| LOC_Os03g28300.2 | protein kinase domain containing protein, expressed                                  | Chr3  | 16282782 | 16290482 + | 6  | 3998 | -6.51 |
| LOC_Os09g28489.1 | expressed protein                                                                    | Chr9  | 17326916 | 17328680 - | 1  | 1797 | 5.25  |
| LOC_Os01g72230.1 | stromal membrane-associated protein, putative, expressed                             | Chr1  | 41882488 | 41886410 + | 9  | 2072 | 4.14  |
| LOC_Os02g11960.1 | ABC transporter, ATP-binding protein, putative, expressed                            | Chr2  | 6197353  | 6204374 +  | 18 | 3471 | 5.57  |
| LOC_Os03g53770.1 | RNA recognition motif containing protein, putative, expressed                        | Chr3  | 30825413 | 30828133 + | 8  | 1096 | 3.87  |
| LOC_Os07g06325.1 | retrotransposon protein, putative, unclassified                                      | Chr7  | 3072799  | 3073095 -  | 1  | 329  | 3.44  |
| LOC_Os05g49980.1 | OsFBL26 - F-box domain and LRR containing protein, expressed                         | Chr5  | 28663259 | 28666983 + | 6  | 2641 | 4.52  |
| LOC_Os03g19780.1 | expressed protein                                                                    | Chr3  | 11133135 | 11134225 + | 1  | 1123 | 4.90  |
| LOC_Os01g53840.1 | protein kinase family protein, putative, expressed                                   | Chr1  | 30949378 | 30954738 - | 11 | 2745 | 5.86  |
| LOC_Os03g58170.2 | stem-specific protein TSJT1, putative, expressed                                     | Chr3  | 33110648 | 33118318 + | 4  | 1343 | 4.68  |
| LOC_Os01g10690.1 | POLD3 - Putative DNA polymerase delta complex subunit, expressed                     | Chr1  | 5718883  | 5724184 -  | 8  | 2485 | 5.40  |
| LOC_Os12g40440.1 | expressed protein                                                                    | Chr12 | 25027023 | 25029724 - | 1  | 2734 | 4.03  |
| LOC_Os10g35810.1 | thylakoid luminal protein, putative, expressed                                       | Chr10 | 19147616 | 19150913 - | 3  | 1760 | 7.43  |
| LOC_Os04g46930.2 | serine racemase, putative, expressed                                                 | Chr4  | 27823815 | 27826597 - | 7  | 1728 | 5.49  |
| LOC_Os02g48600.1 | expressed protein                                                                    | Chr2  | 29752383 | 29753853 + | 2  | 1228 | 6.62  |
| LOC_Os02g12939.1 | expressed protein                                                                    | Chr2  | 6831023  | 6835681 -  | 2  | 3963 | 4.55  |
| LOC_Os12g33240.1 | mitochondrial ribosomal protein S10, putative, expressed                             | Chr12 | 20105725 | 20108020 + | 1  | 2328 | 5.80  |
| LOC_Os03g47270.1 | GCRP4 - Glycine and cysteine rich family protein precursor, expressed                | Chr3  | 26746797 | 26747692 + | 1  | 928  | 3.95  |
| LOC_Os03g31320.2 | RING zinc finger protein-like, putative, expressed                                   | Chr3  | 17850489 | 17853739 - | 2  | 1582 | 5.03  |
| LOC_Os03g34040.1 | ribosomal protein, putative, expressed                                               | Chr3  | 19412908 | 19417098 - | 2  | 1477 | 5.28  |
| LOC_Os03g09045.1 | retrotransposon protein, putative, unclassified, expressed                           | Chr3  | 4694814  | 4695943 +  | 1  | 1162 | 4.62  |
| LOC_Os01g71330.1 | expressed protein                                                                    | Chr1  | 41343327 | 41344284 + | 2  | 921  | 5.60  |
| LOC_Os02g56950.2 | expressed protein                                                                    | Chr2  | 34905434 | 34910822 - | 9  | 2184 | 5.22  |
| LOC_Os08g38080.1 | helix-loop-helix DNA-binding domain containing protein, expressed                    | Chr8  | 24121860 | 24123906 + | 7  | 1360 | 4.15  |
| LOC_Os03g06230.1 | galactose mutarotase-like, putative, expressed                                       | Chr3  | 3119831  | 3123758 -  | 3  | 1928 | 5.37  |
| LOC_Os09g38980.2 | T-complex protein, putative, expressed                                               | Chr9  | 22382924 | 22387041 + | 7  | 2832 | 5.88  |
| LOC_Os06g06802.1 | retrotransposon protein, putative, unclassified, expressed                           | Chr6  | 3204763  | 3212337 +  | 5  | 5872 | 5.42  |
| LOC_Os06g40330.1 | MYB family transcription factor, putative, expressed                                 | Chr6  | 24005099 | 24012308 - | 7  | 2634 | 4.98  |
| LOC_Os02g15660.1 | tetratricopeptide repeat, putative, expressed                                        | Chr2  | 8809967  | 8813976 -  | 6  | 3301 | 5.22  |
| LOC_Os03g13130.2 | ternary complex factor MIP1, putative, expressed                                     | Chr3  | 7088357  | 7092500 +  | 11 | 2905 | 5.06  |
| LOC_Os02g56840.1 | OsFBX70 - F-box domain containing protein, expressed                                 | Chr2  | 34833867 | 34836156 + | 3  | 1456 | 5.13  |
| LOC_Os09g24670.2 | CAAX amino terminal protease family protein, putative, expressed                     | Chr9  | 14680807 | 14684522 + | 9  | 2375 | 6.11  |

|                  |                                                                                                |       |          |            |    |      |       |
|------------------|------------------------------------------------------------------------------------------------|-------|----------|------------|----|------|-------|
| LOC_Os08g31830.1 | UPF0041 domain containing protein, putative, expressed                                         | Chr8  | 19735719 | 19739231 - | 5  | 1008 | 4.05  |
| LOC_Os11g04600.1 | BTBA5 - Bric-a-Brac, Tramtrack, Broad Complex BTB domain with Ankyrin repeat region, expressed | Chr11 | 1951555  | 1954600 +  | 2  | 2142 | 5.37  |
| LOC_Os03g12236.3 | heat shock protein DnaJ, putative, expressed                                                   | Chr3  | 6424393  | 6426920 +  | 5  | 2074 | 4.25  |
| LOC_Os04g35140.1 | OsSub41 - Putative Subtilisin homologue, expressed                                             | Chr4  | 21358864 | 21362109 + | 1  | 3278 | -5.05 |
| LOC_Os02g50320.2 | ATMAP70 protein, putative, expressed                                                           | Chr2  | 30720856 | 30726460 + | 11 | 2904 | 8.03  |
| LOC_Os03g60190.1 | oxidoreductase, 2OG-Fe oxygenase family protein, putative, expressed                           | Chr3  | 34234446 | 34238406 + | 4  | 2589 | 6.01  |
| LOC_Os02g50320.1 | ATMAP70 protein, putative, expressed                                                           | Chr2  | 30720856 | 30726460 + | 11 | 2901 | 8.03  |
| LOC_Os12g01510.2 | MRH1, putative, expressed                                                                      | Chr12 | 306267   | 309900 -   | 7  | 2756 | -7.92 |
| LOC_Os01g20120.2 | expressed protein                                                                              | Chr1  | 11426336 | 11430967 - | 4  | 2024 | 6.26  |
| LOC_Os01g12060.1 | expressed protein                                                                              | Chr1  | 6558931  | 6559377 -  | 1  | 479  | 3.56  |
| LOC_Os09g29790.1 | PPR repeat domain containing protein, putative, expressed                                      | Chr9  | 18101204 | 18109313 - | 13 | 3041 | 5.69  |
| LOC_Os03g41350.1 | BTBN7 - Bric-a-Brac, Tramtrack, Broad Complex BTB domain with non-phototropic hypocotyl 3 N    | Chr3  | 22990165 | 22996471 - | 5  | 2903 | 6.79  |
| LOC_Os01g05744.1 | expressed protein                                                                              | Chr1  | 2742507  | 2747439 +  | 10 | 1584 | 4.85  |
| LOC_Os07g47490.3 | OsGH3.11 - Probable indole-3-acetic acid-amido synthetase, expressed                           | Chr7  | 28391725 | 28400307 - | 6  | 2701 | 4.88  |
| LOC_Os06g20410.1 | BAH domain containing protein, expressed                                                       | Chr6  | 11725804 | 11734594 - | 6  | 2919 | 5.25  |
| LOC_Os09g30474.1 | BPI/LBP family protein At3g20270 precursor, putative, expressed                                | Chr9  | 18569419 | 18574041 - | 6  | 2266 | 7.39  |
| LOC_Os12g04210.2 | mitochondrial glycoprotein, putative, expressed                                                | Chr12 | 1776606  | 1777703 -  | 1  | 1130 | 4.13  |
| LOC_Os04g58400.1 | tRNA synthetase, putative, expressed                                                           | Chr4  | 34743472 | 34749766 - | 9  | 1413 | 4.23  |
| LOC_Os02g53070.1 | HYS1, putative, expressed                                                                      | Chr2  | 32469558 | 32472659 - | 5  | 2497 | 5.71  |
| LOC_Os06g01850.1 | ferredoxin--NADP reductase, chloroplast precursor, putative, expressed                         | Chr6  | 479178   | 481669 -   | 8  | 1737 | 5.07  |
| LOC_Os02g39290.2 | TRAF-type zinc finger family protein, expressed                                                | Chr2  | 23726238 | 23729125 - | 2  | 714  | 5.17  |
| LOC_Os02g55450.1 | retrotransposon protein, putative, unclassified                                                | Chr2  | 33963784 | 33964038 + | 1  | 287  | 3.38  |
| LOC_Os04g26240.1 | OsFBDUF21 - F-box and DUF domain containing protein, expressed                                 | Chr4  | 15297803 | 15299739 - | 3  | 1842 | 4.58  |
| LOC_Os04g26240.2 | OsFBDUF21 - F-box and DUF domain containing protein, expressed                                 | Chr4  | 15297803 | 15299683 - | 2  | 1845 | 4.58  |
| LOC_Os03g13130.1 | ternary complex factor MIP1, putative, expressed                                               | Chr3  | 7088303  | 7092500 +  | 11 | 2950 | 5.06  |
| LOC_Os01g70580.1 | thiamin pyrophosphokinase 1, putative, expressed                                               | Chr1  | 40868708 | 40871884 - | 6  | 1468 | 4.26  |
| LOC_Os01g29180.1 | expressed protein                                                                              | Chr1  | 16346972 | 16349561 - | 2  | 1891 | 4.20  |
| LOC_Os01g61670.1 | ureidoglycolate hydrolase, putative, expressed                                                 | Chr1  | 35682305 | 35685757 + | 3  | 1190 | 4.25  |
| LOC_Os02g13810.1 | DNA binding protein, putative, expressed                                                       | Chr2  | 7467473  | 7470926 -  | 8  | 1564 | 4.38  |
| LOC_Os10g11820.1 | expressed protein                                                                              | Chr10 | 6552107  | 6555101 -  | 1  | 3027 | 6.52  |
| LOC_Os06g02430.1 | expressed protein                                                                              | Chr6  | 835596   | 839193 +   | 8  | 1985 | 5.65  |
| LOC_Os02g56880.1 | transcriptional corepressor LEUNIG, putative, expressed                                        | Chr2  | 34862547 | 34872882 - | 18 | 3732 | 4.99  |
| LOC_Os08g45150.1 | GDSL-like lipase/acylhydrolase, putative, expressed                                            | Chr8  | 28346377 | 28348793 + | 2  | 2370 | 4.12  |
| LOC_Os08g45150.2 | GDSL-like lipase/acylhydrolase, putative, expressed                                            | Chr8  | 28346373 | 28348793 + | 2  | 2370 | 4.12  |
| LOC_Os05g01610.1 | FYVE zinc finger domain containing protein, expressed                                          | Chr5  | 362500   | 365961 +   | 4  | 2882 | 5.80  |
| LOC_Os05g25974.1 | expressed protein                                                                              | Chr5  | 15092144 | 15095127 - | 4  | 2782 | 5.39  |
| LOC_Os08g01070.2 | retrotransposon protein, putative, unclassified, expressed                                     | Chr8  | 54040    | 58327 +    | 9  | 3003 | 4.73  |
| LOC_Os08g01070.4 | retrotransposon protein, putative, unclassified, expressed                                     | Chr8  | 54040    | 58327 +    | 9  | 2998 | 4.73  |
| LOC_Os03g01018.1 | phosphoribosyl transferase, putative, expressed                                                | Chr3  | 19106    | 20491 +    | 1  | 1418 | 5.17  |
| LOC_Os12g42430.3 | IQ calmodulin-binding motif domain containing protein, expressed                               | Chr12 | 26369224 | 26374651 - | 7  | 2073 | 5.31  |
| LOC_Os12g42430.1 | IQ calmodulin-binding motif domain containing protein, expressed                               | Chr12 | 26369224 | 26374651 - | 7  | 2091 | 5.31  |
| LOC_Os03g45270.1 | CS domain containing protein, putative, expressed                                              | Chr3  | 25558176 | 25560461 + | 5  | 625  | 4.84  |
| LOC_Os01g74410.2 | MYB family transcription factor, putative, expressed                                           | Chr1  | 43096392 | 43097974 + | 1  | 1615 | -6.63 |
| LOC_Os08g30020.5 | membrane protein, putative, expressed                                                          | Chr8  | 18452698 | 18457151 + | 9  | 1986 | -5.08 |
| LOC_Os06g44200.2 | ZOS6-06 - C2H2 zinc finger protein, expressed                                                  | Chr6  | 26660938 | 26664595 - | 3  | 2299 | 5.52  |

|                  |                                                                                                       |       |          |            |    |      |       |
|------------------|-------------------------------------------------------------------------------------------------------|-------|----------|------------|----|------|-------|
| LOC_Os03g04450.1 | expressed protein                                                                                     | Chr3  | 2065043  | 2067737 +  | 1  | 2727 | 5.39  |
| LOC_Os08g25734.2 | glucose-1-phosphate adenyltransferase large subunit, chloroplast precursor, putative, expressed       | Chr8  | 15666201 | 15672594 - | 10 | 2264 | 5.64  |
| LOC_Os01g73780.1 | chloroplast outer envelope 24 kD protein, putative, expressed                                         | Chr1  | 42735992 | 42737940 - | 2  | 781  | 4.35  |
| LOC_Os09g16790.1 | transposon protein, putative, CACTA, En/Spm sub-class, expressed                                      | Chr9  | 10263362 | 10266406 + | 7  | 2615 | 3.48  |
| LOC_Os02g44910.1 | transmembrane protein, putative, expressed                                                            | Chr2  | 27208202 | 27212647 - | 9  | 2306 | 6.44  |
| LOC_Os05g45770.2 | Divergent PAP2 family domain containing protein, expressed                                            | Chr5  | 26507606 | 26510057 + | 1  | 2484 | 7.41  |
| LOC_Os07g32600.2 | glucan endo-1,3-beta-glucosidase precursor, putative, expressed                                       | Chr7  | 19436899 | 19439331 + | 2  | 2250 | 5.78  |
| LOC_Os06g20310.1 | expressed protein                                                                                     | Chr6  | 11670344 | 11673430 - | 5  | 2369 | 3.82  |
| LOC_Os06g44200.1 | ZOS6-06 - C2H2 zinc finger protein, expressed                                                         | Chr6  | 26660938 | 26664595 - | 3  | 2320 | 5.52  |
| LOC_Os02g44235.1 | expressed protein                                                                                     | Chr2  | 26767603 | 26770876 - | 10 | 1641 | 6.60  |
| LOC_Os07g48970.1 | OsPOP17 - Putative Prolyl Oligopeptidase homologue, expressed                                         | Chr7  | 29303741 | 29307647 + | 10 | 2607 | 5.43  |
| LOC_Os08g25734.1 | glucose-1-phosphate adenyltransferase large subunit, chloroplast precursor, putative, expressed       | Chr8  | 15666201 | 15671051 - | 10 | 2383 | 5.64  |
| LOC_Os01g25720.1 | disease resistance protein RGA4, putative, expressed                                                  | Chr1  | 14576587 | 14581967 - | 1  | 5413 | -7.24 |
| LOC_Os07g44630.1 | thymidylate kinase, putative, expressed                                                               | Chr7  | 26631322 | 26633686 - | 7  | 1404 | 5.11  |
| LOC_Os06g44200.3 | ZOS6-06 - C2H2 zinc finger protein, expressed                                                         | Chr6  | 26660938 | 26664595 - | 2  | 2346 | 5.52  |
| LOC_Os12g18130.2 | expressed protein                                                                                     | Chr12 | 10454432 | 10458548 - | 3  | 764  | 3.92  |
| LOC_Os09g04890.1 | histone-lysine N-methyltransferase, H3 lysine-4 specific ATX1, putative, expressed                    | Chr9  | 2601650  | 2615934 -  | 25 | 4401 | 5.35  |
| LOC_Os12g40480.1 | H-BTB9 - Bric-a-Brac, Tramtrack, Broad Complex BTB domain with H family conserved sequence, expressed | Chr12 | 25045199 | 25048597 + | 4  | 2627 | 4.95  |
| LOC_Os11g31650.1 | expressed protein                                                                                     | Chr11 | 18509086 | 18512627 + | 2  | 832  | 3.98  |
| LOC_Os06g06490.3 | U-box domain containing heat shock protein, putative, expressed                                       | Chr6  | 3051104  | 3052716 +  | 2  | 1346 | 6.06  |
| LOC_Os04g44300.2 | transposon protein, putative, unclassified, expressed                                                 | Chr4  | 26236222 | 26240651 - | 7  | 3034 | 7.14  |
| LOC_Os05g49220.2 | GTP-binding protein, putative, expressed                                                              | Chr5  | 28242004 | 28244772 - | 9  | 1967 | 5.95  |
| LOC_Os01g07920.2 | prolyl 4-hydroxylase, putative, expressed                                                             | Chr1  | 3827042  | 3830347 -  | 7  | 1414 | 4.09  |
| LOC_Os09g25980.1 | glutamate receptor 2.6 precursor, putative, expressed                                                 | Chr9  | 15599149 | 15606592 - | 6  | 3051 | 5.37  |
| LOC_Os12g01510.1 | MRH1, putative, expressed                                                                             | Chr12 | 306267   | 310246 -   | 9  | 2900 | -7.92 |
| LOC_Os01g08310.1 | serine/threonine protein phosphatase 2A 59 kDa regulatory subunit Bgamma isoform, putative, expressed | Chr1  | 4068617  | 4070372 -  | 2  | 969  | 3.77  |
| LOC_Os08g17080.1 | PPR repeat domain containing protein, putative, expressed                                             | Chr8  | 10453817 | 10458045 + | 3  | 2303 | 4.98  |
| LOC_Os12g43840.1 | ankyrin repeat domain-containing protein, putative, expressed                                         | Chr12 | 27213496 | 27219059 - | 12 | 2227 | 4.81  |
| LOC_Os02g46320.1 | glucosyltransferase, putative, expressed                                                              | Chr2  | 28233661 | 28237216 + | 4  | 2174 | 6.24  |
| LOC_Os06g02500.1 | superoxide dismutase, chloroplast, putative, expressed                                                | Chr6  | 864273   | 866968 -   | 8  | 2007 | 6.27  |
| LOC_Os04g59600.1 | pentatricopeptide, putative, expressed                                                                | Chr4  | 35439339 | 35443771 + | 6  | 2305 | 3.98  |
| LOC_Os05g44570.1 | histidine-containing phosphotransfer protein, putative, expressed                                     | Chr5  | 25927984 | 25931525 - | 6  | 1239 | 3.71  |
| LOC_Os07g06210.1 | retrotransposon protein, putative, unclassified                                                       | Chr7  | 3027555  | 3027851 -  | 1  | 329  | 3.38  |
| LOC_Os09g12540.1 | chlorophyll A-B binding protein, putative, expressed                                                  | Chr9  | 7185218  | 7188146 +  | 5  | 1368 | 5.40  |
| LOC_Os03g24890.1 | RNA recognition motif containing protein, putative, expressed                                         | Chr3  | 14176397 | 14181042 + | 7  | 1410 | 6.05  |
| LOC_Os09g32410.1 | OsFBX333 - F-box domain containing protein, expressed                                                 | Chr9  | 19352404 | 19357059 - | 5  | 3022 | 6.48  |
| LOC_Os03g13130.3 | ternary complex factor MIP1, putative, expressed                                                      | Chr3  | 7088192  | 7092500 +  | 11 | 3076 | 5.06  |
| LOC_Os06g08032.1 | flavonol synthase/flavanone 3-hydroxylase, putative, expressed                                        | Chr6  | 3893672  | 3895400 +  | 4  | 1425 | 4.93  |
| LOC_Os01g72980.2 | tRNA uridine 5-carboxymethylaminomethyl modification enzyme gidA, putative, expressed                 | Chr1  | 42329246 | 42335754 - | 13 | 3080 | 7.30  |
| LOC_Os12g01590.1 | expressed protein                                                                                     | Chr12 | 355523   | 359361 -   | 4  | 2462 | 3.82  |
| LOC_Os02g49150.1 | RNA polymerase Rpb4, putative, expressed                                                              | Chr2  | 30053464 | 30058543 - | 10 | 1639 | 4.54  |
| LOC_Os02g49150.2 | RNA polymerase Rpb4, putative, expressed                                                              | Chr2  | 30053464 | 30058543 - | 9  | 1697 | 4.57  |
| LOC_Os02g49150.3 | RNA polymerase Rpb4, putative, expressed                                                              | Chr2  | 30053464 | 30058543 - | 10 | 1615 | 4.53  |
| LOC_Os01g72980.1 | tRNA uridine 5-carboxymethylaminomethyl modification enzyme gidA, putative, expressed                 | Chr1  | 42329246 | 42335754 - | 13 | 3130 | 7.32  |
| LOC_Os02g12570.1 | pre-mRNA cleavage complex II protein Clp1, putative, expressed                                        | Chr2  | 6568146  | 6572535 +  | 10 | 1952 | 4.71  |

|                  |                                                                                           |       |          |            |    |      |       |
|------------------|-------------------------------------------------------------------------------------------|-------|----------|------------|----|------|-------|
| LOC_Os05g33510.1 | peptide methionine sulfoxide reductase msrB, putative, expressed                          | Chr5  | 19681732 | 19684599 + | 3  | 1102 | 5.75  |
| LOC_Os06g36320.1 | receptor-like protein kinase 5 precursor, putative, expressed                             | Chr6  | 21279310 | 21282208 + | 3  | 2834 | 4.85  |
| LOC_Os01g25720.2 | disease resistance protein RGA4, putative, expressed                                      | Chr1  | 14576587 | 14581967 - | 2  | 5352 | -7.28 |
| LOC_Os06g40960.1 | ZOS6-05 - C2H2 zinc finger protein, expressed                                             | Chr6  | 24453131 | 24456495 + | 2  | 2023 | 4.69  |
| LOC_Os10g31420.1 | retrotransposon protein, putative, unclassified, expressed                                | Chr10 | 16476146 | 16477079 - | 1  | 966  | 3.97  |
| LOC_Os10g41790.2 | type II intron maturase protein, putative, expressed                                      | Chr10 | 22489253 | 22492226 + | 2  | 2950 | 6.21  |
| LOC_Os03g46730.3 | expressed protein                                                                         | Chr3  | 26442733 | 26444293 + | 2  | 793  | 5.42  |
| LOC_Os05g11510.1 | B-box zinc finger family protein, putative, expressed                                     | Chr5  | 6514746  | 6517280 +  | 3  | 2154 | 4.60  |
| LOC_Os06g38010.1 | retrotransposon protein, putative, Ty3-gypsy subclass, expressed                          | Chr6  | 22471426 | 22478151 + | 3  | 5511 | 3.21  |
| LOC_Os10g27470.1 | KH domain containing protein, putative, expressed                                         | Chr10 | 14487133 | 14493136 + | 7  | 2499 | 4.90  |
| LOC_Os12g37740.1 | resistance protein LR10, putative, expressed                                              | Chr12 | 23167074 | 23171951 - | 3  | 3519 | 5.75  |
| LOC_Os10g20440.1 | retrotransposon protein, putative, unclassified, expressed                                | Chr10 | 10286400 | 10292118 + | 2  | 5191 | -6.15 |
| LOC_Os03g59450.1 | transporter-related, putative, expressed                                                  | Chr3  | 33837942 | 33841754 - | 4  | 2163 | 5.01  |
| LOC_Os05g32430.2 | NLI interacting factor-like phosphatase, putative, expressed                              | Chr5  | 18928206 | 18932374 + | 7  | 1577 | 4.31  |
| LOC_Os03g01700.1 | expressed protein                                                                         | Chr3  | 430478   | 432878 -   | 2  | 2370 | -7.89 |
| LOC_Os06g21670.1 | retrotransposon protein, putative, unclassified, expressed                                | Chr6  | 12512114 | 12513337 + | 4  | 1231 | 5.69  |
| LOC_Os05g09650.1 | ubiquinone biosynthesis protein COQ4, putative, expressed                                 | Chr5  | 5450104  | 5451973 +  | 3  | 967  | 3.90  |
| LOC_Os03g17440.1 | expressed protein                                                                         | Chr3  | 9700359  | 9703425 -  | 4  | 1353 | 5.41  |
| LOC_Os01g50030.1 | CPuORF25 - conserved peptide uORF-containing transcript, expressed                        | Chr1  | 28739987 | 28744762 + | 12 | 2421 | 7.73  |
| LOC_Os05g43760.1 | TCP family transcription factor, putative, expressed                                      | Chr5  | 25436354 | 25438703 + | 2  | 1713 | 4.33  |
| LOC_Os12g01930.4 | lipase-related, putative, expressed                                                       | Chr12 | 554438   | 558636 -   | 10 | 2365 | 5.00  |
| LOC_Os08g38010.3 | expressed protein                                                                         | Chr8  | 24079623 | 24082996 + | 4  | 2276 | 4.70  |
| LOC_Os02g57940.1 | OsFBX74 - F-box domain containing protein, expressed                                      | Chr2  | 35481853 | 35483956 - | 1  | 2136 | 6.48  |
| LOC_Os06g10200.4 | adenylate kinase, putative, expressed                                                     | Chr6  | 5221419  | 5223682 +  | 5  | 1253 | 4.86  |
| LOC_Os02g53490.1 | cation efflux family protein, putative, expressed                                         | Chr2  | 32721002 | 32723788 + | 7  | 2123 | 5.21  |
| LOC_Os03g29830.1 | expressed protein                                                                         | Chr3  | 16999140 | 17002312 + | 3  | 1191 | -5.40 |
| LOC_Os01g54730.1 | expressed protein                                                                         | Chr1  | 31487114 | 31490247 - | 2  | 3093 | 5.18  |
| LOC_Os01g07480.2 | DUF260 domain containing protein, putative, expressed                                     | Chr1  | 3551044  | 3552990 -  | 3  | 1384 | 5.16  |
| LOC_Os02g32950.1 | RCN2 Centroradialis-like1 homologous to TFL1 gene%3B contains Pfam profile PF01161%3A Phc | Chr2  | 19567632 | 19568968 - | 4  | 822  | -6.02 |
| LOC_Os05g48940.1 | expressed protein                                                                         | Chr5  | 28071956 | 28076493 - | 5  | 2432 | 5.51  |
| LOC_Os01g69870.2 | expressed protein                                                                         | Chr1  | 40371949 | 40373618 + | 2  | 1045 | 4.47  |
| LOC_Os01g54730.2 | expressed protein                                                                         | Chr1  | 31487114 | 31490247 - | 2  | 3084 | 5.18  |
| LOC_Os09g32710.1 | expressed protein                                                                         | Chr9  | 19509236 | 19512674 - | 7  | 1917 | 5.54  |
| LOC_Os05g23990.1 | rp3 protein, putative, expressed                                                          | Chr5  | 13817137 | 13822276 + | 3  | 4624 | -5.42 |
| LOC_Os07g44630.2 | thymidylate kinase, putative, expressed                                                   | Chr7  | 26631322 | 26633686 - | 6  | 1465 | 5.11  |
| LOC_Os06g24020.1 | retrotransposon protein, putative, unclassified                                           | Chr6  | 14031403 | 14031630 - | 1  | 260  | 3.41  |
| LOC_Os01g39680.3 | expressed protein                                                                         | Chr1  | 22379059 | 22383049 + | 7  | 1409 | -6.15 |
| LOC_Os03g29810.1 | OsClp6 - Putative Clp protease homologue, expressed                                       | Chr3  | 16994268 | 16997742 + | 9  | 1602 | 6.19  |
| LOC_Os12g42970.1 | GATA zinc finger domain containing protein, expressed                                     | Chr12 | 26693519 | 26696516 + | 2  | 1520 | 4.78  |
| LOC_Os01g39680.1 | expressed protein                                                                         | Chr1  | 22379059 | 22383049 + | 7  | 1418 | -6.15 |
| LOC_Os09g35670.2 | expressed protein                                                                         | Chr9  | 20519235 | 20522576 + | 8  | 1946 | 5.62  |
| LOC_Os04g38970.1 | protein binding protein, putative, expressed                                              | Chr4  | 23148230 | 23151738 - | 4  | 2391 | 5.73  |
| LOC_Os04g38970.2 | protein binding protein, putative, expressed                                              | Chr4  | 23149143 | 23151738 - | 3  | 2305 | 5.68  |
| LOC_Os01g53020.1 | heat shock protein DnaJ, putative, expressed                                              | Chr1  | 30472593 | 30475205 + | 9  | 1712 | 7.36  |
| LOC_Os08g33154.1 | expressed protein                                                                         | Chr8  | 20618998 | 20622780 - | 2  | 3721 | 6.80  |

|                  |                                                                                             |       |          |          |   |    |      |       |
|------------------|---------------------------------------------------------------------------------------------|-------|----------|----------|---|----|------|-------|
| LOC_Os12g03990.1 | dual specificity protein phosphatase, putative, expressed                                   | Chr12 | 1652554  | 1655465  | - | 6  | 1923 | 4.44  |
| LOC_Os01g02840.1 | resistance-related receptor-like kinase, putative, expressed                                | Chr1  | 997963   | 1000997  | + | 3  | 2007 | 4.71  |
| LOC_Os01g65400.1 | DNA polymerase I, putative, expressed                                                       | Chr1  | 37956305 | 37958989 | - | 6  | 1985 | 6.96  |
| LOC_Os04g47290.3 | amine oxidase, putative, expressed                                                          | Chr4  | 28076454 | 28080015 | + | 11 | 2215 | 5.32  |
| LOC_Os09g29825.1 | pentatricopeptide, putative, expressed                                                      | Chr9  | 18135734 | 18136435 | + | 1  | 734  | 5.11  |
| LOC_Os12g34400.1 | expressed protein                                                                           | Chr12 | 20850016 | 20851258 | + | 4  | 1004 | 3.90  |
| LOC_Os02g32370.1 | inositol hexaphosphate kinase, putative, expressed                                          | Chr2  | 19121903 | 19125842 | + | 2  | 1850 | 3.90  |
| LOC_Os05g49480.1 | transcription factor-related, putative, expressed                                           | Chr5  | 28360602 | 28361930 | + | 2  | 1184 | 4.02  |
| LOC_Os04g44300.1 | transposon protein, putative, unclassified, expressed                                       | Chr4  | 26236216 | 26240651 | - | 6  | 3116 | 7.18  |
| LOC_Os03g39530.1 | expressed protein                                                                           | Chr3  | 21955115 | 21956457 | + | 4  | 446  | 3.44  |
| LOC_Os03g10870.1 | membrane associated DUF588 domain containing protein, putative, expressed                   | Chr3  | 5586002  | 5588859  | + | 3  | 1043 | 3.91  |
| LOC_Os12g33080.1 | 2-oxoglutarate/malate translocator, chloroplast precursor, putative, expressed              | Chr12 | 20005372 | 20008889 | + | 3  | 2122 | 5.48  |
| LOC_Os02g45120.1 | expressed protein                                                                           | Chr2  | 27369109 | 27371822 | + | 2  | 764  | 4.50  |
| LOC_Os01g65400.4 | DNA polymerase I, putative, expressed                                                       | Chr1  | 37955088 | 37958989 | - | 4  | 3720 | 6.19  |
| LOC_Os12g21870.1 | type II intron maturase protein, putative, expressed                                        | Chr12 | 12312707 | 12318342 | - | 7  | 2875 | 4.40  |
| LOC_Os04g02530.3 | expressed protein                                                                           | Chr4  | 937893   | 943051   | + | 3  | 1143 | 6.43  |
| LOC_Os09g20910.1 | expressed protein                                                                           | Chr9  | 12582819 | 12590857 | - | 16 | 3914 | 5.31  |
| LOC_Os01g73460.1 | ATXR, putative, expressed                                                                   | Chr1  | 42567843 | 42573082 | + | 6  | 1889 | 5.07  |
| LOC_Os09g19160.1 | serine/threonine-protein kinase, putative, expressed                                        | Chr9  | 11449827 | 11458902 | + | 11 | 2329 | 4.91  |
| LOC_Os12g42250.1 | ZOS12-10 - C2H2 zinc finger protein, expressed                                              | Chr12 | 26210779 | 26211896 | - | 1  | 1150 | 5.80  |
| LOC_Os10g40824.1 | expressed protein                                                                           | Chr10 | 21953518 | 21955536 | + | 1  | 2051 | 4.39  |
| LOC_Os03g43390.1 | F-box/LRR domain containing protein, putative, expressed                                    | Chr3  | 24189817 | 24197398 | + | 11 | 2438 | 3.66  |
| LOC_Os08g27010.1 | APE1, putative, expressed                                                                   | Chr8  | 16506115 | 16510326 | + | 9  | 1628 | 4.21  |
| LOC_Os11g37980.1 | GAUT2/LGT2, putative, expressed                                                             | Chr11 | 22514187 | 22518111 | - | 7  | 2068 | 7.73  |
| LOC_Os12g10330.1 | NB-ARC domain containing protein, expressed                                                 | Chr12 | 5469044  | 5471369  | - | 1  | 2358 | -7.33 |
| LOC_Os12g01510.3 | MRH1, putative, expressed                                                                   | Chr12 | 306267   | 310246   | - | 7  | 3029 | -7.92 |
| LOC_Os01g65400.5 | DNA polymerase I, putative, expressed                                                       | Chr1  | 37955088 | 37958989 | - | 5  | 3654 | 6.18  |
| LOC_Os03g43390.2 | F-box/LRR domain containing protein, putative, expressed                                    | Chr3  | 24189817 | 24197398 | + | 11 | 2429 | 3.66  |
| LOC_Os08g25130.1 | enhancer of polycomb, putative, expressed                                                   | Chr8  | 15256028 | 15267417 | - | 12 | 2643 | 4.80  |
| LOC_Os01g61670.3 | ureidoglycolate hydrolase, putative, expressed                                              | Chr1  | 35683106 | 35685757 | + | 2  | 897  | 4.25  |
| LOC_Os12g42430.2 | IQ calmodulin-binding motif domain containing protein, expressed                            | Chr12 | 26369224 | 26374188 | - | 7  | 2093 | 5.29  |
| LOC_Os07g23720.1 | B4-BTB4 - Bric-a-Brac, Tramtrack, Broad Complex BTB domain with B4 subfamily conserved sequ | Chr7  | 13384446 | 13386049 | + | 1  | 1636 | 5.23  |
| LOC_Os03g43390.3 | F-box/LRR domain containing protein, putative, expressed                                    | Chr3  | 24189817 | 24197398 | + | 11 | 2416 | 3.66  |
| LOC_Os04g16792.1 | uncharacterized protein ycf76, putative                                                     | Chr4  | 9144093  | 9144349  | + | 1  | 289  | 4.52  |
| LOC_Os02g13140.1 | xaa-Pro dipeptidase, putative, expressed                                                    | Chr2  | 6985223  | 6993606  | + | 16 | 2732 | 6.15  |
| LOC_Os01g19380.1 | pentatricopeptide, putative, expressed                                                      | Chr1  | 10965000 | 10968073 | + | 4  | 1514 | 4.73  |
| LOC_Os03g26000.1 | expressed protein                                                                           | Chr3  | 14899827 | 14906973 | + | 12 | 4529 | 5.40  |
| LOC_Os04g59610.1 | expressed protein                                                                           | Chr4  | 35443924 | 35446343 | + | 4  | 1932 | 6.31  |
| LOC_Os03g42440.1 | expressed protein                                                                           | Chr3  | 23616738 | 23620260 | - | 3  | 658  | 3.61  |
| LOC_Os08g25130.2 | enhancer of polycomb, putative, expressed                                                   | Chr8  | 15256028 | 15267443 | - | 12 | 2665 | 4.80  |
| LOC_Os03g21370.1 | expressed protein                                                                           | Chr3  | 12219824 | 12223237 | + | 3  | 1150 | 4.58  |
| LOC_Os01g53630.1 | ulp1 protease family protein, putative, expressed                                           | Chr1  | 30788730 | 30796556 | - | 12 | 2344 | 4.05  |
| LOC_Os01g04200.1 | metallo-beta-lactamase family protein, putative, expressed                                  | Chr1  | 1849834  | 1856303  | + | 13 | 2418 | 6.08  |
| LOC_Os05g33020.1 | preprotein translocase subunit secY, putative, expressed                                    | Chr5  | 19346026 | 19353385 | - | 13 | 3015 | 4.84  |
| LOC_Os04g54230.1 | wound induced protein, putative, expressed                                                  | Chr4  | 32297556 | 32298132 | - | 1  | 609  | 3.75  |



|                  |                                                                                 |       |          |            |    |      |       |
|------------------|---------------------------------------------------------------------------------|-------|----------|------------|----|------|-------|
| LOC_Os03g18940.1 | exonuclease, putative, expressed                                                | Chr3  | 10606874 | 10612264 + | 4  | 1831 | 5.91  |
| LOC_Os03g60190.2 | oxidoreductase, ZOG-Fe oxygenase family protein, putative, expressed            | Chr3  | 34234446 | 34238406 + | 3  | 2821 | 6.02  |
| LOC_Os11g43320.1 | NBS-LRR type disease resistance protein, putative, expressed                    | Chr11 | 26139957 | 26143460 + | 1  | 3536 | 6.08  |
| LOC_Os11g35040.1 | aminotransferase, classes I and II, domain containing protein, expressed        | Chr11 | 20525547 | 20529233 - | 7  | 1830 | 5.59  |
| LOC_Os03g50160.1 | plastocyanin-like domain containing protein, putative, expressed                | Chr3  | 28604432 | 28606325 - | 2  | 841  | -5.33 |
| LOC_Os08g31150.1 | retrotransposon protein, putative, unclassified, expressed                      | Chr8  | 19249643 | 19257180 - | 7  | 6200 | -4.79 |
| LOC_Os07g13950.1 | expressed protein                                                               | Chr7  | 7973477  | 7975774 -  | 4  | 338  | 3.30  |
| LOC_Os02g45950.1 | expressed protein                                                               | Chr2  | 27995118 | 27998650 + | 7  | 1724 | 5.81  |
| LOC_Os07g27150.1 | trafficking protein particle complex subunit 4, putative, expressed             | Chr7  | 15751011 | 15755972 + | 4  | 1205 | 4.77  |
| LOC_Os06g41390.3 | N-terminal asparagine amidohydrolase, putative, expressed                       | Chr6  | 24814005 | 24817722 - | 9  | 1864 | 5.08  |
| LOC_Os11g09960.1 | expressed protein                                                               | Chr11 | 5336524  | 5340505 -  | 3  | 915  | 6.01  |
| LOC_Os10g12354.1 | endonuclease, putative, expressed                                               | Chr10 | 6868486  | 6878306 +  | 6  | 2590 | 7.25  |
| LOC_Os01g43050.1 | CENP-C1, putative, expressed                                                    | Chr1  | 24559329 | 24568663 + | 18 | 3473 | 5.82  |
| LOC_Os12g01510.4 | MRH1, putative, expressed                                                       | Chr12 | 306267   | 310513 -   | 10 | 3077 | -7.92 |
| LOC_Os02g56210.1 | hydrolase, NUDIX family, domain containing protein, expressed                   | Chr2  | 34378631 | 34382107 - | 8  | 1576 | 5.48  |
| LOC_Os03g39407.1 | expressed protein                                                               | Chr3  | 21900414 | 21904231 + | 3  | 2941 | 4.85  |
| LOC_Os11g35050.2 | expressed protein                                                               | Chr11 | 20533132 | 20538142 - | 7  | 3038 | 5.55  |
| LOC_Os10g12354.2 | endonuclease, putative, expressed                                               | Chr10 | 6868486  | 6878306 +  | 6  | 2600 | 7.26  |
| LOC_Os02g53500.1 | RFC5 - Putative clamp loader of PCNA, replication factor C subunit 5, expressed | Chr2  | 32723377 | 32727558 - | 9  | 1832 | 5.47  |
| LOC_Os06g01640.1 | arginine N-methyltransferase 7, putative, expressed                             | Chr6  | 375706   | 382683 +   | 14 | 2934 | 3.87  |
| LOC_Os06g20430.2 | BPI/LBP family protein At3g20270 precursor, putative, expressed                 | Chr6  | 11737120 | 11741015 - | 5  | 2606 | 4.46  |
| LOC_Os01g48220.1 | protein of unknown function DUF1421 domain containing protein, expressed        | Chr1  | 27631022 | 27633567 - | 3  | 2160 | 4.62  |
| LOC_Os04g47860.1 | ZOS4-11 - C2H2 zinc finger protein, expressed                                   | Chr4  | 28408775 | 28416032 + | 3  | 3525 | 4.63  |
| LOC_Os04g47860.2 | ZOS4-11 - C2H2 zinc finger protein, expressed                                   | Chr4  | 28408775 | 28416032 + | 3  | 3506 | 4.63  |
| LOC_Os04g47860.6 | ZOS4-11 - C2H2 zinc finger protein, expressed                                   | Chr4  | 28408775 | 28416032 + | 3  | 3503 | 4.63  |
| LOC_Os03g09310.1 | frigida, putative, expressed                                                    | Chr3  | 4862183  | 4866739 -  | 3  | 1881 | 4.41  |
| LOC_Os01g50050.1 | polyprenyl synthetase, putative, expressed                                      | Chr1  | 28752055 | 28755585 - | 12 | 1912 | 5.30  |
| LOC_Os10g39980.1 | expressed protein                                                               | Chr10 | 21417293 | 21419897 + | 3  | 2217 | -7.56 |
| LOC_Os06g20430.1 | BPI/LBP family protein At3g20270 precursor, putative, expressed                 | Chr6  | 11737126 | 11741015 - | 6  | 1932 | 4.35  |
| LOC_Os11g07100.1 | receptor-like protein kinase precursor, putative, expressed                     | Chr11 | 3535405  | 3540184 +  | 4  | 3896 | 5.26  |
| LOC_Os04g47860.3 | ZOS4-11 - C2H2 zinc finger protein, expressed                                   | Chr4  | 28408733 | 28416018 + | 5  | 3349 | 4.63  |
| LOC_Os04g30880.1 | TBC domain containing protein, expressed                                        | Chr4  | 18452744 | 18456670 + | 9  | 1976 | 5.76  |
| LOC_Os12g10740.1 | leucine-rich repeat family protein, putative, expressed                         | Chr12 | 5765954  | 5773383 +  | 19 | 4044 | -6.13 |
| LOC_Os06g41390.1 | N-terminal asparagine amidohydrolase, putative, expressed                       | Chr6  | 24814005 | 24817722 - | 9  | 1827 | 5.08  |
| LOC_Os06g41390.2 | N-terminal asparagine amidohydrolase, putative, expressed                       | Chr6  | 24814005 | 24817722 - | 9  | 1827 | 5.08  |
| LOC_Os02g35039.2 | NAD dependent epimerase/dehydratase family protein, putative, expressed         | Chr2  | 21027729 | 21038863 + | 9  | 1695 | 5.66  |
| LOC_Os07g12520.1 | zinc ion binding protein, putative, expressed                                   | Chr7  | 7145539  | 7149827 +  | 6  | 3098 | 4.30  |
| LOC_Os02g03360.1 | expressed protein                                                               | Chr2  | 1360424  | 1363699 +  | 3  | 712  | 4.05  |
| LOC_Os03g42230.1 | B3 DNA binding domain containing protein, expressed                             | Chr3  | 23491995 | 23496324 + | 7  | 2908 | 5.11  |
| LOC_Os05g49240.1 | homeodomain-related, putative, expressed                                        | Chr5  | 28253514 | 28255081 + | 2  | 716  | 7.79  |
| LOC_Os10g40550.2 | CPuORF23 - conserved peptide uORF-containing transcript, expressed              | Chr10 | 21706982 | 21710973 - | 11 | 2202 | 5.70  |
| LOC_Os02g10090.2 | expressed protein                                                               | Chr2  | 5254199  | 5257596 -  | 5  | 2501 | 5.29  |
| LOC_Os03g59160.1 | elongation factor P, putative, expressed                                        | Chr3  | 33688274 | 33692248 - | 11 | 1141 | 4.61  |
| LOC_Os04g31330.1 | exo70 exocyst complex subunit domain containing protein, expressed              | Chr4  | 18740585 | 18743328 + | 1  | 2776 | 5.08  |
| LOC_Os12g38670.1 | transposon protein, putative, CACTA, En/Spm sub-class, expressed                | Chr12 | 23744664 | 23750582 - | 9  | 3690 | -5.62 |

|                  |                                                                                |       |          |            |    |      |      |
|------------------|--------------------------------------------------------------------------------|-------|----------|------------|----|------|------|
| LOC_Os08g14770.1 | aminotransferase, putative, expressed                                          | Chr8  | 8879910  | 8888141 -  | 14 | 3340 | 6.51 |
| LOC_Os04g47860.4 | ZOS4-11 - C2H2 zinc finger protein, expressed                                  | Chr4  | 28408664 | 28416032 + | 4  | 3068 | 4.63 |
| LOC_Os04g47860.5 | ZOS4-11 - C2H2 zinc finger protein, expressed                                  | Chr4  | 28408664 | 28416032 + | 4  | 3065 | 4.63 |
| LOC_Os03g01850.2 | cyclin-dependent kinase A-1, putative, expressed                               | Chr3  | 511272   | 514786 +   | 8  | 1763 | 6.35 |
| LOC_Os06g47930.1 | expressed protein                                                              | Chr6  | 28988077 | 28990335 - | 3  | 1709 | 6.11 |
| LOC_Os04g53520.1 | expressed protein                                                              | Chr4  | 31880493 | 31894575 - | 6  | 2331 | 4.85 |
| LOC_Os06g35900.1 | BES1/BZR1 homolog protein, putative, expressed                                 | Chr6  | 20941120 | 20944275 + | 2  | 1785 | 4.75 |
| LOC_Os01g50050.2 | polyprenyl synthetase, putative, expressed                                     | Chr1  | 28752167 | 28755585 - | 11 | 1865 | 5.11 |
| LOC_Os07g22910.1 | expressed protein                                                              | Chr7  | 12906247 | 12908649 + | 4  | 959  | 4.11 |
| LOC_Os09g17930.1 | transposon protein, putative, CACTA, En/Spm sub-class, expressed               | Chr9  | 10977575 | 10981276 - | 9  | 2463 | 6.82 |
| LOC_Os01g52304.1 | NB-ARC domain containing protein, expressed                                    | Chr1  | 30062716 | 30066346 + | 2  | 2964 | 4.89 |
| LOC_Os03g09310.2 | frigida, putative, expressed                                                   | Chr3  | 4862184  | 4866739 -  | 2  | 1932 | 4.41 |
| LOC_Os02g38580.1 | protein phosphatase 2C, putative, expressed                                    | Chr2  | 23326336 | 23331896 + | 11 | 2110 | 6.56 |
| LOC_Os01g57870.2 | disease resistance protein RPS2, putative, expressed                           | Chr1  | 33460254 | 33463913 - | 3  | 3525 | 7.64 |
| LOC_Os04g59610.2 | expressed protein                                                              | Chr4  | 35443924 | 35446343 + | 4  | 2032 | 6.31 |
| LOC_Os02g35039.1 | NAD dependent epimerase/dehydratase family protein, putative, expressed        | Chr2  | 21027729 | 21038863 + | 10 | 1654 | 5.66 |
| LOC_Os08g44320.1 | low molecular weight protein-tyrosine-phosphatase slr0328, putative, expressed | Chr8  | 27888895 | 27893038 - | 6  | 1343 | 5.46 |
| LOC_Os01g48900.1 | dynamamin-related protein 1A, putative, expressed                              | Chr1  | 28054938 | 28060595 + | 14 | 3139 | 6.09 |
| LOC_Os11g32090.1 | geranylgeranyl transferase type-2 subunit beta, putative, expressed            | Chr11 | 18903855 | 18904547 - | 2  | 652  | 4.57 |
| LOC_Os03g55200.1 | ORC5 - Putative origin recognition complex subunit 5, expressed                | Chr3  | 31410884 | 31413346 + | 4  | 2238 | 4.96 |
| LOC_Os05g43820.2 | ras-related protein, putative, expressed                                       | Chr5  | 25474799 | 25478182 + | 6  | 2834 | 6.10 |
| LOC_Os03g38940.1 | expressed protein                                                              | Chr3  | 21631065 | 21634055 - | 3  | 2844 | 5.64 |
| LOC_Os05g50980.1 | SET domain containing protein, expressed                                       | Chr5  | 29251632 | 29255944 - | 11 | 2188 | 5.04 |
| LOC_Os09g24230.1 | haloacid dehalogenase-like hydrolase family protein, putative, expressed       | Chr9  | 14387518 | 14389888 - | 5  | 1254 | 4.54 |
| LOC_Os02g10090.1 | expressed protein                                                              | Chr2  | 5254080  | 5257596 -  | 6  | 2550 | 5.29 |
| LOC_Os12g05750.1 | eukaryotic aspartyl protease domain containing protein, expressed              | Chr12 | 2650651  | 2651769 -  | 1  | 1151 | 3.94 |
| LOC_Os04g01130.1 | chromatin modification-related protein EAF3, putative, expressed               | Chr4  | 89024    | 97924 +    | 11 | 1528 | 4.99 |
| LOC_Os11g35050.1 | expressed protein                                                              | Chr11 | 20533032 | 20538185 - | 7  | 3187 | 5.55 |
| LOC_Os02g17280.1 | gamma-secretase subunit APH-1B, putative, expressed                            | Chr2  | 9902629  | 9907888 +  | 6  | 1319 | 4.22 |
| LOC_Os07g04210.1 | Ser/Thr protein phosphatase family protein, putative, expressed                | Chr7  | 1841996  | 1848576 +  | 16 | 3491 | 4.91 |
| LOC_Os01g67520.1 | VTC2, putative, expressed                                                      | Chr1  | 39244417 | 39247128 + | 7  | 2039 | 6.21 |
| LOC_Os04g30910.1 | SAM domain family protein, expressed                                           | Chr4  | 18468228 | 18473269 + | 5  | 1353 | 4.82 |
| LOC_Os05g49920.1 | pentatricopeptide, putative, expressed                                         | Chr5  | 28633062 | 28635805 + | 1  | 2776 | 7.28 |
| LOC_Os03g31320.1 | RING zinc finger protein-like, putative, expressed                             | Chr3  | 17850489 | 17853697 + | 3  | 1693 | 5.01 |
| LOC_Os06g10420.1 | nitrilase, putative, expressed                                                 | Chr6  | 5356979  | 5358952 +  | 8  | 1120 | 4.22 |
| LOC_Os01g42980.4 | ribosomal protein L22, putative, expressed                                     | Chr1  | 24480855 | 24483664 + | 8  | 1262 | 5.26 |
| LOC_Os12g22090.2 | expressed protein                                                              | Chr12 | 12425383 | 12429748 + | 5  | 2205 | 3.77 |
| LOC_Os12g22090.4 | expressed protein                                                              | Chr12 | 12425383 | 12429741 + | 5  | 2195 | 3.77 |
| LOC_Os10g20510.3 | expressed protein                                                              | Chr10 | 10337377 | 10339305 + | 1  | 1961 | 4.41 |
| LOC_Os02g14890.1 | expressed protein                                                              | Chr2  | 8292472  | 8293263 +  | 1  | 824  | 4.13 |
| LOC_Os05g49980.2 | OsFBL26 - F-box domain and LRR containing protein, expressed                   | Chr5  | 28663259 | 28666596 + | 4  | 2395 | 4.48 |
| LOC_Os01g45070.2 | peptide deformylase, putative, expressed                                       | Chr1  | 25586543 | 25589162 - | 5  | 1047 | 6.30 |
| LOC_Os02g47610.1 | nmrA-like family domain containing protein, expressed                          | Chr2  | 29094969 | 29097451 - | 5  | 1392 | 4.81 |
| LOC_Os02g52140.2 | RNA recognition motif containing protein, putative, expressed                  | Chr2  | 31916107 | 31920601 - | 6  | 1275 | 5.81 |
| LOC_Os01g67520.3 | VTC2, putative, expressed                                                      | Chr1  | 39244417 | 39247128 + | 6  | 2124 | 6.25 |

|                  |                                                                                  |       |          |            |    |      |       |
|------------------|----------------------------------------------------------------------------------|-------|----------|------------|----|------|-------|
| LOC_Os03g21000.1 | thioredoxin, putative, expressed                                                 | Chr3  | 11919251 | 11921367 - | 4  | 1431 | 4.97  |
| LOC_Os03g24860.1 | transporter family protein, putative, expressed                                  | Chr3  | 14153872 | 14159202 - | 18 | 2356 | 4.56  |
| LOC_Os06g49080.1 | zinc finger C-x8-C-x5-C-x3-H type family protein, expressed                      | Chr6  | 29738880 | 29742503 + | 11 | 2186 | 5.39  |
| LOC_Os10g13550.2 | endonuclease/exonuclease/phosphatase family domain containing protein, expressed | Chr10 | 7335809  | 7338831 -  | 9  | 1869 | 5.92  |
| LOC_Os10g18860.1 | retrotransposon protein, putative, Ty1-copia subclass, expressed                 | Chr10 | 9610519  | 9614744 -  | 3  | 3249 | 4.92  |
| LOC_Os01g07090.1 | 5-azacytidine resistance protein azr1, putative, expressed                       | Chr1  | 3332952  | 3336075 -  | 12 | 1783 | 4.74  |
| LOC_Os07g07220.1 | LSM domain containing protein, expressed                                         | Chr7  | 3574404  | 3576953 +  | 2  | 1439 | 3.79  |
| LOC_Os07g10860.1 | expressed protein                                                                | Chr7  | 5931013  | 5939269 +  | 10 | 1439 | 4.12  |
| LOC_Os05g48410.1 | 50S ribosomal protein L21, chloroplast precursor, putative, expressed            | Chr5  | 27756066 | 27759135 - | 5  | 1449 | 5.45  |
| LOC_Os10g40580.1 | expressed protein                                                                | Chr10 | 21731114 | 21737010 + | 3  | 2727 | 5.40  |
| LOC_Os12g06290.1 | expressed protein                                                                | Chr12 | 3007570  | 3009854 -  | 4  | 1290 | 6.18  |
| LOC_Os11g06320.1 | expressed protein                                                                | Chr11 | 3027596  | 3031893 -  | 4  | 2809 | 5.71  |
| LOC_Os06g45140.2 | bZIP transcription factor domain containing protein, expressed                   | Chr6  | 27299914 | 27302107 - | 4  | 2004 | 6.07  |
| LOC_Os03g23760.1 | retrotransposon protein, putative, Ty3-gypsy subclass, expressed                 | Chr3  | 13460393 | 13469269 + | 5  | 3982 | 3.32  |
| LOC_Os07g03270.1 | heat shock protein DnaJ, putative, expressed                                     | Chr7  | 1313767  | 1316455 -  | 7  | 1287 | 4.53  |
| LOC_Os04g53020.1 | GRF zinc finger family protein                                                   | Chr4  | 31575624 | 31576441 + | 3  | 750  | 3.87  |
| LOC_Os01g54050.1 | histidine-containing phosphotransfer protein, putative, expressed                | Chr1  | 31092032 | 31094953 + | 6  | 2011 | 5.60  |
| LOC_Os06g20310.3 | expressed protein                                                                | Chr6  | 11669579 | 11673430 - | 5  | 3131 | 3.85  |
| LOC_Os01g07990.1 | retrotransposon protein, putative, unclassified, expressed                       | Chr1  | 3864260  | 3868543 +  | 1  | 4316 | 5.33  |
| LOC_Os03g20020.1 | plant neutral invertase domain containing protein, expressed                     | Chr3  | 11283340 | 11287896 - | 6  | 2494 | 6.59  |
| LOC_Os03g43420.1 | single-stranded DNA-binding protein, putative, expressed                         | Chr3  | 24215221 | 24219448 - | 5  | 1526 | 5.79  |
| LOC_Os06g21620.2 | expressed protein                                                                | Chr6  | 12471709 | 12476347 - | 8  | 1617 | 5.54  |
| LOC_Os06g20310.2 | expressed protein                                                                | Chr6  | 11669579 | 11673430 - | 5  | 3149 | 3.85  |
| LOC_Os05g04170.4 | AMP-binding enzyme, putative, expressed                                          | Chr5  | 1866878  | 1871653 -  | 18 | 2747 | 5.66  |
| LOC_Os07g06230.1 | hypothetical protein                                                             | Chr7  | 3031410  | 3031705 -  | 2  | 301  | 3.22  |
| LOC_Os02g21780.1 | retrotransposon protein, putative, unclassified, expressed                       | Chr2  | 12944749 | 12946023 + | 1  | 1307 | 4.56  |
| LOC_Os05g06814.1 | expressed protein                                                                | Chr5  | 3560985  | 3571380 -  | 10 | 2110 | 3.97  |
| LOC_Os01g05460.1 | expressed protein                                                                | Chr1  | 2575583  | 2578210 -  | 5  | 760  | 3.61  |
| LOC_Os12g26044.1 | expressed protein                                                                | Chr12 | 15127532 | 15129908 - | 7  | 1281 | 5.90  |
| LOC_Os10g41790.1 | type II intron maturase protein, putative, expressed                             | Chr10 | 22489253 | 22492227 + | 1  | 3007 | 6.27  |
| LOC_Os06g50350.1 | expressed protein                                                                | Chr6  | 30479410 | 30480798 + | 2  | 682  | 3.96  |
| LOC_Os05g25780.1 | rhodanese-like domain containing protein, putative, expressed                    | Chr5  | 14997859 | 15000770 + | 5  | 1880 | 6.23  |
| LOC_Os11g44310.1 | calmodulin binding protein, putative, expressed                                  | Chr11 | 26777812 | 26783973 + | 9  | 2600 | 5.90  |
| LOC_Os04g52440.1 | aminotransferase, putative, expressed                                            | Chr4  | 31169012 | 31174731 + | 19 | 2513 | 5.69  |
| LOC_Os02g08260.1 | HD domain containing protein 2, putative, expressed                              | Chr2  | 4384188  | 4388042 +  | 8  | 1427 | 5.95  |
| LOC_Os02g21520.1 | chalcone isomerase 3, putative, expressed                                        | Chr2  | 12765282 | 12772122 + | 5  | 1379 | 5.47  |
| LOC_Os01g01970.1 | expressed protein                                                                | Chr1  | 524579   | 527952 -   | 4  | 1279 | 4.27  |
| LOC_Os01g39680.2 | expressed protein                                                                | Chr1  | 22379059 | 22383049 + | 7  | 1824 | -6.17 |
| LOC_Os05g06814.2 | expressed protein                                                                | Chr5  | 3560985  | 3571380 -  | 9  | 2144 | 3.97  |
| LOC_Os09g35920.1 | mediator of RNA polymerase II transcription subunit 10, putative, expressed      | Chr9  | 20673831 | 20678640 - | 6  | 3302 | 5.59  |
| LOC_Os08g35948.2 | expressed protein                                                                | Chr8  | 22670558 | 22675587 - | 4  | 1604 | 4.21  |
| LOC_Os01g44050.1 | siroheme synthase, putative, expressed                                           | Chr1  | 25234661 | 25238165 + | 6  | 2148 | 7.07  |
| LOC_Os09g33580.2 | BEE 1, putative, expressed                                                       | Chr9  | 19812623 | 19815196 - | 8  | 1715 | 5.81  |
| LOC_Os06g07932.2 | flavonol synthase/flavanone 3-hydroxylase, putative, expressed                   | Chr6  | 3855441  | 3857393 +  | 4  | 1649 | 4.93  |
| LOC_Os11g09160.1 | B3 DNA binding domain containing protein, expressed                              | Chr11 | 4894638  | 4899923 -  | 5  | 2104 | 4.52  |

|                  |                                                                                          |       |          |            |    |      |       |
|------------------|------------------------------------------------------------------------------------------|-------|----------|------------|----|------|-------|
| LOC_Os07g29720.1 | expressed protein                                                                        | Chr7  | 17471134 | 17472072 - | 2  | 523  | -5.01 |
| LOC_Os10g37640.1 | HIT zinc finger domain containing protein, expressed                                     | Chr10 | 20140647 | 20144863 - | 5  | 1761 | 5.51  |
| LOC_Os01g65400.2 | DNA polymerase I, putative, expressed                                                    | Chr1  | 37957139 | 37959001 - | 5  | 1498 | 3.99  |
| LOC_Os02g33350.1 | harpin-induced protein 1 domain containing protein, expressed                            | Chr2  | 19954553 | 19955660 - | 1  | 1140 | -6.25 |
| LOC_Os08g39330.1 | skin secretory protein xP2 precursor, putative, expressed                                | Chr8  | 24854285 | 24855757 + | 2  | 989  | 5.26  |
| LOC_Os02g20430.1 | WD domain, G-beta repeat domain containing protein, expressed                            | Chr2  | 12054833 | 12057372 + | 9  | 1404 | 5.68  |
| LOC_Os08g41320.1 | BHLH transcription factor, putative, expressed                                           | Chr8  | 26102849 | 26105371 + | 8  | 2063 | 4.43  |
| LOC_Os09g31040.1 | EF hand family protein, putative, expressed                                              | Chr9  | 18672137 | 18673106 + | 1  | 1002 | 6.78  |
| LOC_Os01g16152.1 | peroxiredoxin, putative, expressed                                                       | Chr1  | 9117901  | 9121417 -  | 5  | 1358 | 6.57  |
| LOC_Os04g06850.1 | expressed protein                                                                        | Chr4  | 3609046  | 3613651 -  | 2  | 2750 | 4.31  |
| LOC_Os01g09430.1 | expressed protein                                                                        | Chr1  | 4800247  | 4802179 +  | 3  | 1278 | 5.48  |
| LOC_Os03g43850.1 | recA protein, putative, expressed                                                        | Chr3  | 24591390 | 24596469 + | 13 | 2029 | 5.25  |
| LOC_Os03g22700.1 | cyclin-dependent kinase C-2, putative, expressed                                         | Chr3  | 13110912 | 13115736 - | 6  | 2398 | 4.38  |
| LOC_Os03g08370.1 | transposon protein, putative, unclassified, expressed                                    | Chr3  | 4272870  | 4277474 +  | 5  | 3269 | 6.49  |
| LOC_Os12g26044.2 | expressed protein                                                                        | Chr12 | 15127532 | 15129908 - | 7  | 1311 | 5.90  |
| LOC_Os02g54200.1 | mitochondrial transcription termination factor family protein, putative, expressed       | Chr2  | 33224445 | 33227590 - | 4  | 1853 | 4.63  |
| LOC_Os01g57870.1 | disease resistance protein RPS2, putative, expressed                                     | Chr1  | 33460254 | 33463913 - | 1  | 3692 | 7.64  |
| LOC_Os02g39800.1 | SET domain containing protein, expressed                                                 | Chr2  | 24050126 | 24053010 - | 7  | 914  | 4.99  |
| LOC_Os09g37446.2 | expressed protein                                                                        | Chr9  | 21595349 | 21597946 - | 4  | 2454 | 6.18  |
| LOC_Os10g40550.1 | CPuORF23 - conserved peptide uORF-containing transcript, expressed                       | Chr10 | 21706909 | 21710977 - | 12 | 2411 | 5.80  |
| LOC_Os07g42490.2 | sucrose synthase, putative, expressed                                                    | Chr7  | 25429639 | 25435177 + | 16 | 3468 | 5.12  |
| LOC_Os03g63680.1 | expressed protein                                                                        | Chr3  | 35968492 | 35970517 + | 2  | 1310 | 4.27  |
| LOC_Os01g05640.1 | receptor-like protein kinase 5 precursor, putative, expressed                            | Chr1  | 2688623  | 2692186 -  | 3  | 3403 | 6.51  |
| LOC_Os05g03000.2 | inner membrane protein alx, putative, expressed                                          | Chr5  | 1127011  | 1132408 -  | 14 | 2283 | 4.87  |
| LOC_Os07g33200.1 | expressed protein                                                                        | Chr7  | 19827230 | 19833195 + | 10 | 2427 | 6.96  |
| LOC_Os01g13660.2 | expressed protein                                                                        | Chr1  | 7653910  | 7656854 -  | 2  | 1212 | 6.76  |
| LOC_Os01g71390.1 | retrotransposon protein, putative, unclassified, expressed                               | Chr1  | 41367744 | 41369024 + | 2  | 391  | 3.41  |
| LOC_Os04g59610.3 | expressed protein                                                                        | Chr4  | 35443924 | 35446343 + | 2  | 2162 | 6.31  |
| LOC_Os07g07520.1 | OsFBX217 - F-box domain containing protein, expressed                                    | Chr7  | 3745353  | 3749974 +  | 4  | 1141 | 5.01  |
| LOC_Os04g02730.1 | tRNA-dihydrouridine synthase 3-like, putative, expressed                                 | Chr4  | 1046902  | 1054004 +  | 10 | 2826 | 6.53  |
| LOC_Os01g52260.1 | serine acetyltransferase protein, putative, expressed                                    | Chr1  | 30042527 | 30043938 + | 1  | 1444 | 5.62  |
| LOC_Os05g28460.1 | MEE12, putative, expressed                                                               | Chr5  | 16662669 | 16664342 + | 3  | 1597 | 4.14  |
| LOC_Os01g01970.2 | expressed protein                                                                        | Chr1  | 524579   | 528002 -   | 4  | 1217 | 4.31  |
| LOC_Os03g18830.2 | programmed cell death protein 2, putative, expressed                                     | Chr3  | 10552724 | 10556172 - | 10 | 1930 | 5.40  |
| LOC_Os06g06810.1 | OsSub49 - Putative Subtilisin homologue, expressed                                       | Chr6  | 3213518  | 3219042 +  | 6  | 3082 | 6.57  |
| LOC_Os04g43040.2 | expressed protein                                                                        | Chr4  | 25468673 | 25471556 - | 6  | 1375 | 4.79  |
| LOC_Os07g05010.2 | helix-loop-helix DNA-binding domain containing protein, expressed                        | Chr7  | 2207088  | 2210741 +  | 8  | 2483 | 4.56  |
| LOC_Os05g26660.1 | NADH-ubiquinone oxidoreductase, mitochondrial precursor, putative, expressed             | Chr5  | 15482300 | 15488221 - | 10 | 2514 | 5.21  |
| LOC_Os03g13040.1 | haemolysin-III, putative, expressed                                                      | Chr3  | 7046802  | 7051333 -  | 3  | 2225 | 3.93  |
| LOC_Os12g42044.3 | OsWAK127b - OsWAK short gene, expressed                                                  | Chr12 | 26081703 | 26086841 - | 5  | 2439 | 5.71  |
| LOC_Os02g07670.1 | URED, putative, expressed                                                                | Chr2  | 3992144  | 3994997 -  | 8  | 1408 | 3.99  |
| LOC_Os10g37640.2 | HIT zinc finger domain containing protein, expressed                                     | Chr10 | 20140647 | 20144863 - | 4  | 1806 | 5.51  |
| LOC_Os10g05940.1 | expressed protein                                                                        | Chr10 | 2995396  | 2998062 +  | 3  | 778  | 3.91  |
| LOC_Os03g16130.5 | CAMK_CAMK_like_ULKh_APGy.2 - CAMK includes calcium/calmodulin dependent protein kinases, | Chr3  | 8896279  | 8897471 -  | 3  | 1106 | 4.63  |
| LOC_Os06g36210.1 | amino acid transporter, putative, expressed                                              | Chr6  | 21208192 | 21214381 + | 3  | 2474 | 6.56  |

|                  |                                                                                        |       |          |            |    |      |        |
|------------------|----------------------------------------------------------------------------------------|-------|----------|------------|----|------|--------|
| LOC_Os07g05010.1 | helix-loop-helix DNA-binding domain containing protein, expressed                      | Chr7  | 2207088  | 2210741 +  | 8  | 2499 | 4.56   |
| LOC_Os03g59600.1 | mitochondrial Rho GTPase 1, putative, expressed                                        | Chr3  | 33936155 | 33937972 - | 5  | 922  | 5.63   |
| LOC_Os03g13150.1 | non-symbiotic hemoglobin 2, putative, expressed                                        | Chr3  | 7096670  | 7097510 +  | 4  | 638  | 3.51   |
| LOC_Os01g04490.1 | Ser/Thr protein kinase, putative, expressed                                            | Chr1  | 1998427  | 2002855 +  | 5  | 1894 | 3.80   |
| LOC_Os03g06710.1 | PPR repeat domain containing protein, putative, expressed                              | Chr3  | 3407989  | 3413958 +  | 3  | 3229 | 6.03   |
| LOC_Os01g12560.1 | 3-methyl-2-oxobutanoate hydroxymethyltransferase, putative, expressed                  | Chr1  | 6909691  | 6912131 -  | 5  | 1536 | 4.62   |
| LOC_Os09g37446.1 | expressed protein                                                                      | Chr9  | 21595350 | 21597946 - | 3  | 2501 | 6.18   |
| LOC_Os02g32340.1 | Spc97 / Spc98 family protein, putative, expressed                                      | Chr2  | 19090970 | 19097416 - | 17 | 4248 | 5.42   |
| LOC_Os08g14390.1 | expressed protein                                                                      | Chr8  | 8630959  | 8636402 +  | 5  | 1333 | 4.91   |
| LOC_Os08g05790.2 | caffeoyl-CoA O-methyltransferase, putative, expressed                                  | Chr8  | 3101979  | 3105447 +  | 9  | 1922 | 6.25   |
| LOC_Os04g57140.1 | kinesin motor domain containing protein, putative, expressed                           | Chr4  | 34039969 | 34050200 - | 22 | 6226 | 5.64   |
| LOC_Os02g33560.1 | expressed protein                                                                      | Chr2  | 19962597 | 19967923 - | 5  | 1809 | 4.77   |
| LOC_Os03g64060.1 | expressed protein                                                                      | Chr3  | 36193349 | 36193847 - | 1  | 531  | 3.42   |
| LOC_Os07g08880.4 | ES43 protein, putative, expressed                                                      | Chr7  | 4606679  | 4609665 +  | 2  | 764  | 4.85   |
| LOC_Os02g52140.1 | RNA recognition motif containing protein, putative, expressed                          | Chr2  | 31916107 | 31920602 - | 6  | 1288 | 5.85   |
| LOC_Os02g45090.1 | expressed protein                                                                      | Chr2  | 27352069 | 27357013 - | 7  | 1872 | 7.10   |
| LOC_Os12g42044.2 | OsWAK127b - OsWAK short gene, expressed                                                | Chr12 | 26081667 | 26086831 - | 5  | 2465 | 5.71   |
| LOC_Os05g25950.1 | cyclin, putative, expressed                                                            | Chr5  | 15084915 | 15086150 + | 1  | 1268 | 5.56   |
| LOC_Os07g39590.1 | spotted leaf 11, putative, expressed                                                   | Chr7  | 23721772 | 23724795 + | 2  | 2057 | 5.10   |
| LOC_Os04g43360.2 | Os4bglu14 - monolignol beta-glucoside homologue without catalytic acid/base, expressed | Chr4  | 25640270 | 25644607 - | 12 | 2404 | 6.50   |
| LOC_Os05g11840.1 | expressed protein                                                                      | Chr5  | 6750798  | 6752113 +  | 1  | 1348 | 4.16   |
| LOC_Os04g43360.1 | Os4bglu14 - monolignol beta-glucoside homologue without catalytic acid/base, expressed | Chr4  | 25640268 | 25644607 - | 12 | 2410 | 6.50   |
| LOC_Os01g07480.1 | DUF260 domain containing protein, putative, expressed                                  | Chr1  | 3551044  | 3553146 -  | 4  | 1459 | 5.39   |
| LOC_Os02g38490.4 | expressed protein                                                                      | Chr2  | 23272523 | 23274491 + | 3  | 495  | 5.89   |
| LOC_Os06g19420.1 | expressed protein                                                                      | Chr6  | 11064049 | 11065140 - | 2  | 436  | 3.97   |
| LOC_Os03g07160.1 | OsFBK11 - F-box domain and kelch repeat containing protein, expressed                  | Chr3  | 3664640  | 3669942 +  | 2  | 2414 | 4.79   |
| LOC_Os01g64090.1 | L1P family of ribosomal proteins domain containing protein, expressed                  | Chr1  | 37231748 | 37234375 + | 6  | 909  | 4.60   |
| LOC_Os08g31800.1 | RGH1A, putative, expressed                                                             | Chr8  | 19715508 | 19719680 - | 2  | 3712 | 5.98   |
| LOC_Os11g29850.1 | ABC transporter, ATP-binding protein, putative, expressed                              | Chr11 | 17329608 | 17332992 + | 10 | 1879 | 4.41   |
| LOC_Os12g26044.3 | expressed protein                                                                      | Chr12 | 15127532 | 15129908 - | 6  | 1394 | 5.90   |
| LOC_Os04g33470.2 | Ser/Thr protein phosphatase family protein, putative, expressed                        | Chr4  | 20245217 | 20249961 - | 5  | 1284 | 3.90   |
| LOC_Os08g16810.1 | retrotransposon protein, putative, SINE subclass, expressed                            | Chr8  | 10286867 | 10287842 - | 2  | 893  | -7.64  |
| LOC_Os04g56340.1 | retrotransposon protein, putative, unclassified                                        | Chr4  | 33585824 | 33586078 + | 1  | 287  | 3.18   |
| LOC_Os11g09474.1 | OsFBX400 - F-box domain containing protein, expressed                                  | Chr11 | 5080262  | 5088495 -  | 10 | 3284 | 5.99   |
| LOC_Os02g01450.1 | expressed protein                                                                      | Chr2  | 265783   | 268915 +   | 9  | 1551 | 4.18   |
| LOC_Os07g27350.1 | atuA, putative, expressed                                                              | Chr7  | 15912872 | 15917899 + | 14 | 2980 | 3.81   |
| LOC_Os01g64660.1 | fructose-1,6-bisphosphatase, putative, expressed                                       | Chr1  | 37519523 | 37522613 + | 10 | 2173 | 4.39   |
| LOC_Os02g35620.1 | expressed protein                                                                      | Chr2  | 21419921 | 21422365 - | 1  | 2477 | 5.04   |
| LOC_Os05g45920.1 | S1 RNA binding domain containing protein, expressed                                    | Chr5  | 26608284 | 26612433 + | 9  | 1895 | 4.30   |
| LOC_Os12g04860.2 | DTW domain containing protein, putative, expressed                                     | Chr12 | 2087518  | 2090631 -  | 2  | 1950 | 6.27   |
| LOC_Os03g19427.1 | nicotianamine synthase, putative, expressed                                            | Chr3  | 10929483 | 10930895 - | 1  | 1445 | -10.09 |
| LOC_Os06g38730.1 | receptor-like protein kinase precursor, putative, expressed                            | Chr6  | 22992411 | 22995903 + | 4  | 3137 | 4.53   |
| LOC_Os05g23080.1 | retrotransposon protein, putative, Ty3-gypsy subclass, expressed                       | Chr5  | 13155515 | 13162248 + | 3  | 5460 | 5.25   |
| LOC_Os06g46030.1 | DUF640 domain containing protein, putative, expressed                                  | Chr6  | 27904549 | 27906635 - | 2  | 1529 | 4.53   |
| LOC_Os05g04170.3 | AMP-binding enzyme, putative, expressed                                                | Chr5  | 1866878  | 1873323 -  | 20 | 3026 | 5.73   |

|                  |                                                                                         |       |          |            |    |      |       |
|------------------|-----------------------------------------------------------------------------------------|-------|----------|------------|----|------|-------|
| LOC_Os01g12540.2 | GTPase of unknown function domain containing protein, putative, expressed               | Chr1  | 6897557  | 6904259 +  | 8  | 3592 | 6.76  |
| LOC_Os05g18730.1 | generative cell specific-1, putative, expressed                                         | Chr5  | 10847748 | 10854702 - | 18 | 3063 | 4.24  |
| LOC_Os04g46050.1 | Alg9-like mannosyltransferase protein, putative, expressed                              | Chr4  | 27275215 | 27282749 - | 20 | 2721 | 5.03  |
| LOC_Os09g35700.1 | LTPL45 - Protease inhibitor/seed storage/LTP family protein precursor, expressed        | Chr9  | 20534165 | 20534954 + | 2  | 747  | 3.59  |
| LOC_Os08g05790.1 | caffeoyl-CoA O-methyltransferase, putative, expressed                                   | Chr8  | 3101979  | 3105447 +  | 9  | 1895 | 6.24  |
| LOC_Os05g04170.2 | AMP-binding enzyme, putative, expressed                                                 | Chr5  | 1866878  | 1873316 -  | 20 | 3023 | 5.73  |
| LOC_Os12g34870.1 | mitochondrial carrier protein, putative, expressed                                      | Chr12 | 21225806 | 21229422 - | 8  | 1841 | 4.28  |
| LOC_Os05g35520.2 | deoxynucleoside kinase family, putative, expressed                                      | Chr5  | 21112635 | 21117398 + | 6  | 1978 | 6.34  |
| LOC_Os11g37880.1 | stripe rust resistance protein Yr10, putative, expressed                                | Chr11 | 22451636 | 22458566 + | 4  | 3419 | -6.37 |
| LOC_Os05g07790.1 | DNA binding protein, putative, expressed                                                | Chr5  | 4195278  | 4200491 -  | 11 | 2387 | 4.89  |
| LOC_Os11g47460.4 | MYB family transcription factor, putative, expressed                                    | Chr11 | 28703899 | 28705124 - | 2  | 1208 | -4.68 |
| LOC_Os02g35170.1 | uncharacterized oxidoreductase yoxD, putative, expressed                                | Chr2  | 21122299 | 21125139 + | 5  | 1146 | 5.99  |
| LOC_Os12g19290.1 | AGC_AGC_other_NDRh_TRCd.4 - ACG kinases include homologs to PKA, PKG and PKC, expressed | Chr12 | 11184671 | 11191740 + | 13 | 2919 | 4.25  |
| LOC_Os01g22660.3 | GDSL-like lipase/acylhydrolase, putative, expressed                                     | Chr1  | 12742056 | 12745509 + | 5  | 1615 | 5.82  |
| LOC_Os04g42174.2 | expressed protein                                                                       | Chr4  | 24962835 | 24966545 + | 4  | 1387 | 6.28  |
| LOC_Os10g33910.1 | mitochondrial import inner membrane translocase subunit Tim16, putative, expressed      | Chr10 | 18006943 | 18009746 + | 4  | 945  | 3.70  |
| LOC_Os12g05690.1 | expressed protein                                                                       | Chr12 | 2622155  | 2623105 -  | 1  | 983  | -6.26 |
| LOC_Os06g48640.2 | proteasome/cyclosome repeat containing protein, expressed                               | Chr6  | 29423023 | 29431646 - | 24 | 4414 | 4.37  |
| LOC_Os08g28080.1 | coatomer subunit delta, putative, expressed                                             | Chr8  | 17122122 | 17132608 - | 16 | 3026 | 5.17  |
| LOC_Os05g49670.1 | expressed protein                                                                       | Chr5  | 28487243 | 28488214 + | 1  | 1004 | 3.94  |
| LOC_Os04g46050.3 | Alg9-like mannosyltransferase protein, putative, expressed                              | Chr4  | 27275215 | 27282769 - | 21 | 2808 | 5.03  |
| LOC_Os04g46050.2 | Alg9-like mannosyltransferase protein, putative, expressed                              | Chr4  | 27275215 | 27282769 - | 21 | 2817 | 5.03  |
| LOC_Os05g43830.1 | hydrolase, alpha/beta fold family domain containing protein, expressed                  | Chr5  | 25476707 | 25484371 - | 11 | 2182 | 6.38  |
| LOC_Os10g33730.1 | pentatricopeptide, putative, expressed                                                  | Chr10 | 17800146 | 17803223 - | 1  | 3110 | 4.76  |
| LOC_Os07g11280.2 | pentatricopeptide containing protein, putative, expressed                               | Chr7  | 6224888  | 6231671 -  | 9  | 3480 | 5.39  |
| LOC_Os03g58620.1 | small multi-drug export protein, putative, expressed                                    | Chr3  | 33388090 | 33391157 - | 2  | 1373 | 5.19  |
| LOC_Os02g04320.1 | WD domain, G-beta repeat domain containing protein, expressed                           | Chr2  | 1903004  | 1905136 +  | 2  | 1590 | 5.28  |
| LOC_Os05g18274.1 | expressed protein                                                                       | Chr5  | 10525064 | 10527433 + | 5  | 1979 | 5.62  |
| LOC_Os12g34870.2 | mitochondrial carrier protein, putative, expressed                                      | Chr12 | 21225806 | 21229422 - | 8  | 1860 | 4.28  |
| LOC_Os01g64660.2 | fructose-1,6-bisphosphatase, putative, expressed                                        | Chr1  | 37519523 | 37522613 + | 12 | 2020 | 4.35  |
| LOC_Os02g57050.1 | diphthamide biosynthesis protein, putative, expressed                                   | Chr2  | 34934531 | 34936977 - | 2  | 1789 | 5.03  |
| LOC_Os05g06780.1 | LTPL104 - Protease inhibitor/seed storage/LTP family protein precursor, expressed       | Chr5  | 3539563  | 3540972 -  | 2  | 798  | -6.28 |
| LOC_Os07g03025.1 | expressed protein                                                                       | Chr7  | 1140062  | 1142002 -  | 2  | 1933 | 5.57  |
| LOC_Os06g48640.1 | proteasome/cyclosome repeat containing protein, expressed                               | Chr6  | 29423023 | 29431646 - | 25 | 4361 | 4.37  |
| LOC_Os02g04320.2 | WD domain, G-beta repeat domain containing protein, expressed                           | Chr2  | 1902990  | 1905136 +  | 2  | 1609 | 5.28  |
| LOC_Os02g07670.2 | URED, putative, expressed                                                               | Chr2  | 3992144  | 3995022 -  | 7  | 1497 | 3.99  |
| LOC_Os05g04170.1 | AMP-binding enzyme, putative, expressed                                                 | Chr5  | 1866931  | 1873316 -  | 19 | 3047 | 5.74  |
| LOC_Os06g48640.3 | proteasome/cyclosome repeat containing protein, expressed                               | Chr6  | 29423023 | 29431646 - | 25 | 4273 | 4.37  |
| LOC_Os03g01850.1 | cyclin-dependent kinase A-1, putative, expressed                                        | Chr3  | 510595   | 514786 +   | 9  | 2048 | 6.35  |
| LOC_Os03g48830.1 | ribosomal protein-related, putative, expressed                                          | Chr3  | 27820011 | 27822921 - | 2  | 672  | 4.96  |
| LOC_Os09g39700.1 | expressed protein                                                                       | Chr9  | 22778758 | 22783735 + | 9  | 2830 | 5.11  |
| LOC_Os07g48850.1 | PPR repeat containing protein, expressed                                                | Chr7  | 29227754 | 29232888 - | 3  | 4648 | 5.13  |
| LOC_Os06g43800.2 | methyltransferase domain containing protein, putative, expressed                        | Chr6  | 26375956 | 26379227 - | 6  | 2028 | 4.90  |
| LOC_Os03g24030.1 | glutaredoxin, putative, expressed                                                       | Chr3  | 13631341 | 13632387 + | 1  | 1079 | 4.60  |
| LOC_Os07g32590.1 | peptidase, M24 family protein, putative, expressed                                      | Chr7  | 19427900 | 19432234 + | 11 | 1949 | 4.99  |

|                  |                                                                                |       |          |          |   |    |      |       |
|------------------|--------------------------------------------------------------------------------|-------|----------|----------|---|----|------|-------|
| LOC_Os05g35520.3 | deoxynucleoside kinase family, putative, expressed                             | Chr5  | 21114280 | 21117398 | + | 5  | 2065 | 6.32  |
| LOC_Os02g47310.1 | Cyclopropane-fatty-acyl-phospholipid synthase, putative, expressed             | Chr2  | 28893961 | 28897548 | + | 6  | 1727 | 4.79  |
| LOC_Os04g30910.3 | SAM domain family protein, expressed                                           | Chr4  | 18468243 | 18473815 | + | 5  | 1509 | 5.40  |
| LOC_Os01g10400.1 | expressed protein                                                              | Chr1  | 5478476  | 5479834  | + | 2  | 1284 | 4.42  |
| LOC_Os10g38040.1 | lysM domain containing protein, putative, expressed                            | Chr10 | 20374252 | 20375455 | + | 1  | 1236 | -4.00 |
| LOC_Os10g26570.1 | phosphofructokinase, putative, expressed                                       | Chr10 | 13848972 | 13853484 | - | 14 | 2817 | 6.40  |
| LOC_Os05g33310.1 | oxidoreductase, ZOG-Fe oxygenase family protein, putative, expressed           | Chr5  | 19525642 | 19528980 | - | 6  | 1305 | 5.32  |
| LOC_Os07g47201.1 | adenyl cyclase, putative, expressed                                            | Chr7  | 28215131 | 28221958 | - | 11 | 1934 | 5.44  |
| LOC_Os10g41999.1 | RALFL27 - Rapid Alkalinization Factor RALF family protein precursor, expressed | Chr10 | 22578902 | 22583351 | + | 3  | 1014 | -7.78 |
| LOC_Os03g16580.1 | expressed protein                                                              | Chr3  | 9138551  | 9143660  | + | 3  | 1368 | 4.47  |
| LOC_Os01g64660.3 | fructose-1,6-bisphosphatase, putative, expressed                               | Chr1  | 37519542 | 37522613 | + | 11 | 2073 | 4.35  |
| LOC_Os12g17070.2 | radical SAM enzyme, putative, expressed                                        | Chr12 | 9766670  | 9772331  | - | 3  | 2158 | 5.08  |
| LOC_Os02g05420.1 | expressed protein                                                              | Chr2  | 2607099  | 2611381  | + | 7  | 1910 | 5.22  |
| LOC_Os04g30910.2 | SAM domain family protein, expressed                                           | Chr4  | 18468228 | 18473815 | + | 6  | 1463 | 5.40  |
| LOC_Os09g32310.1 | expressed protein                                                              | Chr9  | 19286853 | 19289900 | + | 4  | 2059 | 5.19  |
| LOC_Os04g31524.1 | expressed protein                                                              | Chr4  | 18847020 | 18850779 | - | 7  | 1456 | 4.15  |
| LOC_Os06g13860.1 | RCD1, putative, expressed                                                      | Chr6  | 7698453  | 7703820  | + | 7  | 3101 | 5.55  |
| LOC_Os03g12290.1 | glutamine synthetase, catalytic domain containing protein, expressed           | Chr3  | 6457910  | 6462727  | - | 11 | 2386 | 4.53  |
| LOC_Os03g51930.1 | expressed protein                                                              | Chr3  | 29789349 | 29791210 | - | 4  | 1125 | 4.64  |
| LOC_Os02g10400.1 | expressed protein                                                              | Chr2  | 5470929  | 5475134  | - | 8  | 1702 | 6.29  |
| LOC_Os01g56550.2 | transcription initiation factor IIF beta subunit, putative, expressed          | Chr1  | 32598081 | 32601810 | - | 6  | 1485 | 6.33  |
| LOC_Os03g19980.2 | tetratricopeptide-like helical, putative, expressed                            | Chr3  | 11252327 | 11259529 | + | 3  | 2675 | 5.21  |
| LOC_Os04g43040.3 | expressed protein                                                              | Chr4  | 25468673 | 25471556 | - | 7  | 1317 | 4.77  |
| LOC_Os09g37949.1 | serine/threonine-protein kinase SRPK1, putative, expressed                     | Chr9  | 21881095 | 21884622 | - | 4  | 2182 | 3.67  |
| LOC_Os04g57140.2 | kinesin motor domain containing protein, putative, expressed                   | Chr4  | 34039969 | 34050200 | - | 23 | 5582 | 5.62  |
| LOC_Os05g44210.1 | trehalose-6-phosphate synthase, putative, expressed                            | Chr5  | 25713720 | 25720299 | + | 16 | 3271 | 6.31  |
| LOC_Os01g56550.1 | transcription initiation factor IIF beta subunit, putative, expressed          | Chr1  | 32598081 | 32601810 | - | 6  | 1488 | 6.33  |
| LOC_Os05g36090.1 | zinc finger DHHC domain-containing protein, putative, expressed                | Chr5  | 21388694 | 21392697 | + | 5  | 2127 | 3.77  |
| LOC_Os04g49230.1 | B3 DNA binding domain containing protein, expressed                            | Chr4  | 29366456 | 29368515 | - | 1  | 2092 | 4.75  |
| LOC_Os03g17920.2 | RNA pseudouridine synthase, putative, expressed                                | Chr3  | 9981239  | 9986561  | + | 11 | 2894 | 5.53  |
| LOC_Os06g01810.1 | expressed protein                                                              | Chr6  | 465680   | 468425   | - | 5  | 1428 | 5.25  |
| LOC_Os03g59470.1 | stage II sporulation protein E, putative, expressed                            | Chr3  | 33845779 | 33849847 | - | 5  | 2353 | 5.30  |
| LOC_Os10g22730.2 | expressed protein                                                              | Chr10 | 11807240 | 11813233 | - | 11 | 2728 | 6.56  |
| LOC_Os01g10340.1 | expressed protein                                                              | Chr1  | 5435443  | 5442651  | - | 11 | 1523 | 5.76  |
| LOC_Os01g56880.1 | purple acid phosphatase precursor, putative, expressed                         | Chr1  | 32848236 | 32852610 | - | 8  | 2383 | 6.95  |
| LOC_Os10g22730.4 | expressed protein                                                              | Chr10 | 11807240 | 11813233 | - | 11 | 2719 | 6.56  |
| LOC_Os10g21274.1 | expressed protein                                                              | Chr10 | 10863664 | 10863984 | + | 1  | 353  | 4.71  |
| LOC_Os01g56550.3 | transcription initiation factor IIF beta subunit, putative, expressed          | Chr1  | 32598081 | 32601810 | - | 6  | 1502 | 6.33  |
| LOC_Os04g34670.1 | tRNA-splicing endonuclease positive effector-related, putative, expressed      | Chr4  | 20967161 | 20973125 | + | 18 | 3272 | 6.27  |
| LOC_Os02g07670.4 | URED, putative, expressed                                                      | Chr2  | 3992144  | 3995041  | - | 7  | 1568 | 3.99  |
| LOC_Os08g38720.1 | cytochrome c oxidase assembly protein COX15, putative, expressed               | Chr8  | 24482352 | 24486058 | + | 7  | 2144 | 4.23  |
| LOC_Os10g37260.1 | fringe-related protein, putative, expressed                                    | Chr10 | 19952435 | 19957362 | - | 4  | 2801 | 5.14  |
| LOC_Os05g46300.1 | OsFBX172 - F-box domain containing protein, expressed                          | Chr5  | 26841422 | 26843053 | - | 1  | 1664 | 4.18  |
| LOC_Os01g42460.1 | BAH domain containing protein, expressed                                       | Chr1  | 24136871 | 24144338 | + | 11 | 2560 | 4.42  |
| LOC_Os01g48440.3 | glycosyltransferase family 43 protein, putative, expressed                     | Chr1  | 27757763 | 27761733 | - | 3  | 2846 | -5.86 |

|                  |                                                                                               |       |          |            |    |      |       |
|------------------|-----------------------------------------------------------------------------------------------|-------|----------|------------|----|------|-------|
| LOC_Os01g13700.1 | DNA-binding protein-related, putative, expressed                                              | Chr1  | 7670066  | 7672762 +  | 2  | 949  | 5.59  |
| LOC_Os05g04860.2 | agenet domain containing protein, putative, expressed                                         | Chr5  | 2334711  | 2339664 -  | 7  | 2392 | 4.27  |
| LOC_Os02g44230.4 | CPuORF22 - conserved peptide uORF-containing transcript, expressed                            | Chr2  | 26767603 | 26771633 - | 11 | 2185 | 5.87  |
| LOC_Os03g17920.1 | RNA pseudouridine synthase, putative, expressed                                               | Chr3  | 9981239  | 9986561 +  | 10 | 2953 | 5.53  |
| LOC_Os08g41090.1 | peroxidase precursor, putative, expressed                                                     | Chr8  | 25971764 | 25974968 - | 11 | 1850 | 7.15  |
| LOC_Os06g30830.1 | OsMADS76 - MADS-box family gene with M-alpha type-box, expressed                              | Chr6  | 17887762 | 17891217 - | 3  | 822  | 3.59  |
| LOC_Os12g09570.2 | GTP binding protein, putative, expressed                                                      | Chr12 | 5030805  | 5034571 +  | 3  | 3015 | 4.81  |
| LOC_Os08g35948.1 | expressed protein                                                                             | Chr8  | 22670558 | 22675587 - | 4  | 1688 | 4.30  |
| LOC_Os12g01580.2 | MATE efflux protein, putative, expressed                                                      | Chr12 | 350767   | 355106 +   | 12 | 2445 | 6.34  |
| LOC_Os06g20500.1 | tRNA-splicing endonuclease positive effector-related, putative, expressed                     | Chr6  | 11782148 | 11787799 - | 20 | 3130 | 5.32  |
| LOC_Os12g38730.2 | expressed protein                                                                             | Chr12 | 23794337 | 23797981 - | 5  | 2575 | 5.04  |
| LOC_Os05g43830.2 | hydrolase, alpha/beta fold family domain containing protein, expressed                        | Chr5  | 25476707 | 25484173 - | 10 | 2054 | 6.38  |
| LOC_Os06g43800.1 | methyltransferase domain containing protein, putative, expressed                              | Chr6  | 26375956 | 26379227 - | 7  | 1895 | 4.88  |
| LOC_Os06g06040.7 | expressed protein                                                                             | Chr6  | 2778579  | 2779879 -  | 2  | 820  | 3.64  |
| LOC_Os04g11400.1 | expressed protein                                                                             | Chr4  | 6231633  | 6232415 -  | 2  | 720  | -5.86 |
| LOC_Os04g23890.4 | AGC_PVPK_like_kin82y.10 - ACG kinases include homologs to PKA, PKG and PKC, expressed         | Chr4  | 13641667 | 13654716 - | 22 | 3989 | 4.97  |
| LOC_Os01g04160.1 | expressed protein                                                                             | Chr1  | 1834110  | 1837733 +  | 3  | 3187 | 5.91  |
| LOC_Os05g31680.1 | expressed protein                                                                             | Chr5  | 18433311 | 18437696 + | 6  | 1911 | 5.49  |
| LOC_Os01g09230.1 | expressed protein                                                                             | Chr1  | 4650095  | 4651961 +  | 2  | 1504 | 5.77  |
| LOC_Os02g44230.3 | CPuORF22 - conserved peptide uORF-containing transcript, expressed                            | Chr2  | 26767603 | 26771633 - | 12 | 2122 | 5.87  |
| LOC_Os05g43820.1 | ras-related protein, putative, expressed                                                      | Chr5  | 25474799 | 25477027 + | 8  | 1407 | 4.57  |
| LOC_Os05g50160.1 | DUF617 domain containing protein, expressed                                                   | Chr5  | 28743375 | 28744604 - | 1  | 1262 | 4.95  |
| LOC_Os07g07080.1 | regulator of chromosome condensation/beta-lactamase-inhibitor protein II, putative, expressed | Chr7  | 3491976  | 3499332 -  | 12 | 4696 | 7.26  |
| LOC_Os08g02140.3 | STIP1 homology and U box-containing protein 1, putative, expressed                            | Chr8  | 715589   | 720189 +   | 6  | 1588 | 5.36  |
| LOC_Os01g56520.2 | double-stranded RNA binding motif containing protein, expressed                               | Chr1  | 32586874 | 32592046 - | 6  | 2133 | 4.35  |
| LOC_Os12g38730.1 | expressed protein                                                                             | Chr12 | 23794337 | 23797981 - | 5  | 2584 | 5.04  |
| LOC_Os12g01580.1 | MATE efflux protein, putative, expressed                                                      | Chr12 | 350766   | 355106 +   | 12 | 2457 | 6.34  |
| LOC_Os05g43690.1 | glucan endo-1,3-beta-glucosidase-like protein 3 precursor, putative, expressed                | Chr5  | 25399241 | 25401867 + | 3  | 1593 | 4.42  |
| LOC_Os02g57854.2 | vacuolar ATP synthase subunit F, putative, expressed                                          | Chr2  | 35429410 | 35430640 + | 2  | 627  | 4.79  |
| LOC_Os01g04200.4 | metallo-beta-lactamase family protein, putative, expressed                                    | Chr1  | 1849837  | 1855978 +  | 11 | 2540 | 6.13  |
| LOC_Os01g72410.1 | Leucine Rich Repeat family protein, expressed                                                 | Chr1  | 41997451 | 42000861 + | 2  | 3369 | 5.31  |
| LOC_Os08g33350.1 | expressed protein                                                                             | Chr8  | 20802476 | 20805200 - | 8  | 1398 | 4.92  |
| LOC_Os08g02110.1 | peroxidase precursor, putative, expressed                                                     | Chr8  | 697180   | 698615 +   | 1  | 1468 | -7.54 |
| LOC_Os06g05640.1 | expressed protein                                                                             | Chr6  | 2551069  | 2554991 +  | 5  | 2014 | 4.78  |
| LOC_Os01g56520.1 | double-stranded RNA binding motif containing protein, expressed                               | Chr1  | 32586873 | 32592046 - | 6  | 2143 | 4.35  |
| LOC_Os05g35520.1 | deoxynucleoside kinase family, putative, expressed                                            | Chr5  | 21112585 | 21117398 + | 5  | 2177 | 6.34  |
| LOC_Os06g35540.1 | aminotransferase, classes I and II, domain containing protein, expressed                      | Chr6  | 20727092 | 20731771 - | 10 | 2194 | 5.12  |
| LOC_Os02g45690.1 | uncharacterized mscS family protein, putative, expressed                                      | Chr2  | 27798048 | 27803943 + | 7  | 2547 | 5.99  |
| LOC_Os02g58580.5 | cation efflux family protein, putative, expressed                                             | Chr2  | 35810519 | 35812446 + | 7  | 1318 | 6.47  |
| LOC_Os06g07932.1 | flavonol synthase/flavanone 3-hydroxylase, putative, expressed                                | Chr6  | 3854646  | 3857393 +  | 6  | 1871 | 4.52  |
| LOC_Os02g23821.1 | retrotransposon protein, putative, unclassified, expressed                                    | Chr2  | 13733777 | 13738201 - | 3  | 3663 | -5.99 |
| LOC_Os01g56880.2 | purple acid phosphatase precursor, putative, expressed                                        | Chr1  | 32848236 | 32852610 - | 7  | 2451 | 6.95  |
| LOC_Os03g16080.2 | mitochondrial carrier protein, putative, expressed                                            | Chr3  | 8865964  | 8869220 +  | 7  | 1902 | 5.34  |
| LOC_Os12g08740.2 | exonuclease, putative, expressed                                                              | Chr12 | 4469470  | 4475431 +  | 14 | 3125 | 5.60  |
| LOC_Os01g58890.2 | cysteine proteinase inhibitor precursor protein, putative, expressed                          | Chr1  | 34033156 | 34034940 + | 2  | 1513 | -3.46 |



|                  |                                                                                                |       |          |          |   |    |      |        |
|------------------|------------------------------------------------------------------------------------------------|-------|----------|----------|---|----|------|--------|
| LOC_Os06g45140.1 | bZIP transcription factor domain containing protein, expressed                                 | Chr6  | 27299914 | 27302107 | - | 5  | 1782 | 6.06   |
| LOC_Os02g44230.1 | CPuORF22 - conserved peptide uORF-containing transcript, expressed                             | Chr2  | 26767603 | 26771633 | - | 12 | 2166 | 5.89   |
| LOC_Os11g40200.1 | expressed protein                                                                              | Chr11 | 23976787 | 23979856 | + | 2  | 1409 | 4.67   |
| LOC_Os10g35820.1 | expressed protein                                                                              | Chr10 | 19152303 | 19152971 | + | 1  | 701  | 4.06   |
| LOC_Os01g64660.4 | fructose-1,6-bisphosphatase, putative, expressed                                               | Chr1  | 37519523 | 37522613 | + | 10 | 2156 | 4.35   |
| LOC_Os02g01940.1 | transcription factor jumonji, putative, expressed                                              | Chr2  | 509377   | 517148   | - | 16 | 3506 | 7.14   |
| LOC_Os08g38320.1 | AGC_PVPK_like_kin82y.14 - ACG kinases include homologs to PKA, PKG and PKC, expressed          | Chr8  | 24274009 | 24277516 | + | 3  | 2694 | 6.18   |
| LOC_Os01g58890.1 | cysteine proteinase inhibitor precursor protein, putative, expressed                           | Chr1  | 34033156 | 34034940 | + | 3  | 1176 | -3.46  |
| LOC_Os01g58890.4 | cysteine proteinase inhibitor precursor protein, putative, expressed                           | Chr1  | 34033158 | 34034940 | + | 2  | 1478 | -3.46  |
| LOC_Os02g44230.2 | CPuORF22 - conserved peptide uORF-containing transcript, expressed                             | Chr2  | 26767603 | 26771609 | - | 12 | 2135 | 5.89   |
| LOC_Os01g27390.1 | glutathione S-transferase, putative, expressed                                                 | Chr1  | 15291669 | 15294415 | + | 3  | 1021 | 4.76   |
| LOC_Os03g19420.2 | nicotianamine synthase, putative, expressed                                                    | Chr3  | 10926469 | 10927950 | + | 1  | 1514 | -10.62 |
| LOC_Os02g40420.1 | expressed protein                                                                              | Chr2  | 24482990 | 24487434 | - | 7  | 2336 | 5.01   |
| LOC_Os01g51410.1 | glycine dehydrogenase, putative, expressed                                                     | Chr1  | 29560350 | 29567065 | + | 15 | 4381 | -3.53  |
| LOC_Os08g02140.2 | STIP1 homology and U box-containing protein 1, putative, expressed                             | Chr8  | 715589   | 720171   | + | 7  | 1517 | 5.36   |
| LOC_Os04g33570.1 | RCN4 Centroradialis-like1 homologous to TFL1 gene%3B contains Pfam profile PF01161%3A Phc      | Chr4  | 20319029 | 20321514 | - | 4  | 1607 | -6.33  |
| LOC_Os01g59510.1 | chloroplast ribonuclease III domain protein, putative, expressed                               | Chr1  | 34412853 | 34416988 | - | 5  | 2325 | 4.26   |
| LOC_Os08g08050.1 | retrotransposon protein, putative, unclassified, expressed                                     | Chr8  | 4566815  | 4569933  | - | 8  | 1312 | 5.58   |
| LOC_Os04g23890.1 | AGC_PVPK_like_kin82y.10 - ACG kinases include homologs to PKA, PKG and PKC, expressed          | Chr4  | 13641668 | 13654855 | - | 23 | 4066 | 4.97   |
| LOC_Os08g06050.1 | OsTOP6A2 - Topoisomerase 6 subunit A homolog 2, expressed                                      | Chr8  | 3301039  | 3304257  | - | 10 | 1987 | 4.88   |
| LOC_Os03g15570.1 | STE_MEKK_ste11_MAP3K.12 - STE kinases include homologs to sterile 7, sterile 11 and sterile 20 | Chr3  | 8572865  | 8577500  | - | 9  | 2948 | 5.00   |
| LOC_Os02g27769.1 | 40S ribosomal protein S27, putative, expressed                                                 | Chr2  | 16445789 | 16446230 | + | 3  | 234  | 3.21   |
| LOC_Os03g10210.1 | homeobox domain containing protein, expressed                                                  | Chr3  | 5180655  | 5182185  | - | 3  | 1387 | 3.55   |
| LOC_Os11g01450.1 | phosphatidate cytidyltransferase, putative, expressed                                          | Chr11 | 262584   | 264493   | - | 6  | 1346 | -6.41  |
| LOC_Os06g05250.2 | GTP-binding protein GUF1, putative, expressed                                                  | Chr6  | 2367069  | 2372121  | - | 11 | 2553 | 5.51   |
| LOC_Os03g57569.2 | expressed protein                                                                              | Chr3  | 32824996 | 32828545 | - | 2  | 1962 | 4.21   |
| LOC_Os12g01930.1 | lipase-related, putative, expressed                                                            | Chr12 | 555086   | 558636   | - | 9  | 2417 | 5.78   |
| LOC_Os02g45090.2 | expressed protein                                                                              | Chr2  | 27352986 | 27357013 | - | 6  | 1730 | 7.46   |
| LOC_Os05g25400.1 | RNA binding protein, putative, expressed                                                       | Chr5  | 14770503 | 14773117 | + | 7  | 1544 | 4.78   |
| LOC_Os01g57440.1 | DNA repair metallo-beta-lactamase, putative, expressed                                         | Chr1  | 33195328 | 33197885 | - | 4  | 1478 | 6.87   |
| LOC_Os01g19150.2 | CGMC_GSK.3 - CGMC includes CDA, MAPK, GSK3, and CLKC kinases, expressed                        | Chr1  | 10822583 | 10827157 | + | 12 | 2741 | 4.35   |
| LOC_Os11g02300.1 | CPuORF36 - conserved peptide uORF-containing transcript, expressed                             | Chr11 | 654974   | 661236   | - | 3  | 3501 | -8.28  |
| LOC_Os03g59610.1 | oxidoreductase, short chain dehydrogenase/reductase family protein, putative, expressed        | Chr3  | 33938923 | 33941373 | + | 2  | 1358 | 4.23   |
| LOC_Os05g30750.2 | anthranilate phosphoribosyltransferase, putative, expressed                                    | Chr5  | 17812073 | 17816465 | + | 4  | 3601 | 6.64   |
| LOC_Os05g34920.1 | expressed protein                                                                              | Chr5  | 20748871 | 20752903 | + | 5  | 2193 | 6.82   |
| LOC_Os01g56320.1 | OsSub4 - Putative Subtilisin homologue, expressed                                              | Chr1  | 32450869 | 32456576 | + | 10 | 3534 | 6.19   |
| LOC_Os01g54530.1 | hydrolase, acting on carbon-nitrogen, putative, expressed                                      | Chr1  | 31362634 | 31365594 | + | 6  | 2043 | 5.59   |
| LOC_Os05g30750.1 | anthranilate phosphoribosyltransferase, putative, expressed                                    | Chr5  | 17812076 | 17816465 | + | 4  | 3583 | 6.64   |
| LOC_Os05g30750.3 | anthranilate phosphoribosyltransferase, putative, expressed                                    | Chr5  | 17812076 | 17816465 | + | 4  | 3576 | 6.64   |
| LOC_Os01g19150.3 | CGMC_GSK.3 - CGMC includes CDA, MAPK, GSK3, and CLKC kinases, expressed                        | Chr1  | 10822583 | 10827157 | + | 12 | 2727 | 4.35   |
| LOC_Os02g11940.2 | sterol glucosyltransferase, putative, expressed                                                | Chr2  | 6188722  | 6193629  | + | 14 | 2055 | 4.78   |
| LOC_Os05g30750.6 | anthranilate phosphoribosyltransferase, putative, expressed                                    | Chr5  | 17812346 | 17816465 | + | 4  | 3525 | 6.64   |
| LOC_Os11g11890.1 | protein kinase domain containing protein, expressed                                            | Chr11 | 6596374  | 6603010  | + | 12 | 2562 | -5.12  |
| LOC_Os04g34010.1 | aluminum-activated malate transporter, putative, expressed                                     | Chr4  | 20592808 | 20596141 | - | 6  | 1927 | 8.16   |
| LOC_Os05g30750.5 | anthranilate phosphoribosyltransferase, putative, expressed                                    | Chr5  | 17812348 | 17816465 | + | 4  | 3512 | 6.64   |

|                  |                                                                                             |       |          |            |    |      |       |
|------------------|---------------------------------------------------------------------------------------------|-------|----------|------------|----|------|-------|
| LOC_Os06g20354.1 | PPR repeat domain containing protein, putative, expressed                                   | Chr6  | 11693031 | 11695278 + | 3  | 1588 | 5.90  |
| LOC_Os01g70840.2 | esterase, putative, expressed                                                               | Chr1  | 41002434 | 41004063 - | 4  | 1287 | 4.11  |
| LOC_Os05g30750.4 | anthranilate phosphoribosyltransferase, putative, expressed                                 | Chr5  | 17812645 | 17816465 + | 3  | 3482 | 6.64  |
| LOC_Os05g30750.7 | anthranilate phosphoribosyltransferase, putative, expressed                                 | Chr5  | 17812623 | 17816465 + | 4  | 3448 | 6.64  |
| LOC_Os03g35326.1 | retrotransposon protein, putative, unclassified, expressed                                  | Chr3  | 19544495 | 19549096 + | 3  | 2766 | -6.54 |
| LOC_Os05g35480.1 | anthranilate phosphoribosyltransferase, putative, expressed                                 | Chr5  | 21080988 | 21084058 - | 1  | 3103 | 4.23  |
| LOC_Os07g38600.1 | REX1 DNA Repair family protein, expressed                                                   | Chr7  | 23185305 | 23186940 - | 3  | 832  | 4.36  |
| LOC_Os04g16878.1 | uncharacterized protein ycf70, putative                                                     | Chr4  | 9181534  | 9181803 -  | 1  | 302  | 4.39  |
| LOC_Os02g10470.1 | EF hand family protein, putative, expressed                                                 | Chr2  | 5501165  | 5504381 +  | 5  | 1387 | 5.47  |
| LOC_Os01g19150.4 | CGMC_GSK.3 - CGMC includes CDA, MAPK, GSK3, and CLKC kinases, expressed                     | Chr1  | 10822583 | 10827157 + | 12 | 2693 | 4.35  |
| LOC_Os05g28200.2 | prenyltransferase, putative, expressed                                                      | Chr5  | 16512069 | 16517848 + | 14 | 2127 | 6.30  |
| LOC_Os08g43950.1 | carrier, putative, expressed                                                                | Chr8  | 27686418 | 27687584 + | 2  | 796  | 4.72  |
| LOC_Os05g32210.1 | NAD kinase, putative, expressed                                                             | Chr5  | 18779694 | 18786821 + | 10 | 2184 | 4.86  |
| LOC_Os01g19150.1 | CGMC_GSK.3 - CGMC includes CDA, MAPK, GSK3, and CLKC kinases, expressed                     | Chr1  | 10822583 | 10827157 + | 13 | 2686 | 4.35  |
| LOC_Os07g07950.2 | type I inositol-1,4,5-trisphosphate 5-phosphatase, putative, expressed                      | Chr7  | 3991647  | 3996800 -  | 13 | 3384 | 6.14  |
| LOC_Os03g43990.2 | BTBN8 - Bric-a-Brac, Tramtrack, Broad Complex BTB domain with non-phototropic hypocotyl 3 N | Chr3  | 24701063 | 24704597 - | 3  | 2532 | 5.28  |
| LOC_Os03g07110.1 | calmodulin-binding protein, putative, expressed                                             | Chr3  | 3630773  | 3635525 -  | 11 | 3286 | 5.33  |
| LOC_Os11g46070.2 | MLA10, putative, expressed                                                                  | Chr11 | 27884617 | 27890896 + | 4  | 3566 | 5.38  |
| LOC_Os01g19150.5 | CGMC_GSK.3 - CGMC includes CDA, MAPK, GSK3, and CLKC kinases, expressed                     | Chr1  | 10822583 | 10827157 + | 13 | 2682 | 4.35  |
| LOC_Os07g07950.1 | type I inositol-1,4,5-trisphosphate 5-phosphatase, putative, expressed                      | Chr7  | 3991610  | 3996800 -  | 14 | 3364 | 6.14  |
| LOC_Os07g33180.1 | retrotransposon protein, putative, Ty3-gypsy subclass, expressed                            | Chr7  | 19806523 | 19808767 + | 3  | 648  | 3.36  |
| LOC_Os12g08740.1 | exonuclease, putative, expressed                                                            | Chr12 | 4469467  | 4475431 +  | 15 | 3067 | 5.55  |
| LOC_Os04g58140.1 | elongation factor Tu, putative, expressed                                                   | Chr4  | 34626345 | 34631340 - | 12 | 2875 | 5.51  |
| LOC_Os10g21298.1 | cytochrome b559 subunit alpha, putative                                                     | Chr10 | 10869191 | 10869442 - | 1  | 284  | 5.04  |
| LOC_Os02g05390.1 | retrotransposon protein, putative, Ty3-gypsy subclass, expressed                            | Chr2  | 2588321  | 2592402 -  | 6  | 1419 | 3.93  |
| LOC_Os03g56830.1 | ad-003, putative, expressed                                                                 | Chr3  | 32379925 | 32383820 - | 10 | 2447 | 4.39  |
| LOC_Os01g47620.1 | expressed protein                                                                           | Chr1  | 27243443 | 27246045 - | 3  | 1263 | 4.81  |
| LOC_Os02g04330.1 | 5-AMP-activated protein kinase beta-1 subunit-related, putative, expressed                  | Chr2  | 1908981  | 1912809 +  | 9  | 1723 | 4.74  |
| LOC_Os01g40420.3 | CBS domain containing membrane protein, putative, expressed                                 | Chr1  | 22820235 | 22823182 - | 5  | 2352 | 4.79  |
| LOC_Os09g35920.2 | mediator of RNA polymerase II transcription subunit 10, putative, expressed                 | Chr9  | 20673834 | 20678640 - | 7  | 2614 | 5.54  |
| LOC_Os07g01540.1 | Ser/Thr protein phosphatase family protein, putative, expressed                             | Chr7  | 335223   | 343722 -   | 16 | 4176 | 6.96  |
| LOC_Os03g54063.1 | expressed protein                                                                           | Chr3  | 30994449 | 30996809 - | 2  | 2338 | 7.35  |
| LOC_Os06g05250.3 | GTP-binding protein GUF1, putative, expressed                                               | Chr6  | 2368985  | 2372121 -  | 8  | 2143 | 5.07  |
| LOC_Os01g12090.1 | ribosomal protein S6 family protein, putative, expressed                                    | Chr1  | 6583822  | 6586889 +  | 4  | 749  | 5.82  |
| LOC_Os02g46810.1 | amino acid transporter, putative, expressed                                                 | Chr2  | 28574011 | 28574592 - | 2  | 541  | 3.33  |
| LOC_Os07g13980.1 | glucose-1-phosphate adenylyltransferase large subunit, putative, expressed                  | Chr7  | 7982501  | 7989283 -  | 16 | 3265 | 4.92  |
| LOC_Os06g03676.1 | CAMK_CAMK_like.6 - CAMK includes calcium/calmodulin dependent protein kinases, expressed    | Chr6  | 1438381  | 1445163 -  | 16 | 2527 | 4.07  |
| LOC_Os01g48010.1 | expressed protein                                                                           | Chr1  | 27482806 | 27486965 + | 2  | 1809 | 4.04  |
| LOC_Os04g23890.3 | AGC_PVPK_like_kin82y.10 - ACG kinases include homologs to PKA, PKG and PKC, expressed       | Chr4  | 13641585 | 13654855 - | 23 | 4154 | 4.98  |
| LOC_Os10g35090.1 | Rf1, mitochondrial precursor, putative, expressed                                           | Chr10 | 18718068 | 18722354 - | 5  | 3854 | 3.94  |
| LOC_Os12g22839.1 | expressed protein                                                                           | Chr12 | 12892693 | 12893547 + | 1  | 887  | 3.68  |
| LOC_Os02g35750.1 | pentatricopeptide repeat domain containing protein, putative, expressed                     | Chr2  | 21471731 | 21473822 + | 1  | 2124 | 5.99  |
| LOC_Os12g01930.5 | lipase-related, putative, expressed                                                         | Chr12 | 555086   | 558644 -   | 9  | 2414 | 5.77  |
| LOC_Os07g46330.1 | uncharacterized UPF0114 domain containing protein, expressed                                | Chr7  | 27630646 | 27633384 + | 5  | 1538 | 4.19  |
| LOC_Os04g38820.1 | GRF zinc finger family protein                                                              | Chr4  | 23085980 | 23087964 - | 4  | 962  | 3.56  |

|                  |                                                                                          |       |          |            |    |      |       |
|------------------|------------------------------------------------------------------------------------------|-------|----------|------------|----|------|-------|
| LOC_Os12g29570.1 | expressed protein                                                                        | Chr12 | 17624459 | 17625315 + | 3  | 720  | 4.23  |
| LOC_Os02g16450.1 | expressed protein                                                                        | Chr2  | 9390823  | 9393829 -  | 2  | 2082 | 5.01  |
| LOC_Os10g30550.1 | tRNA methyltransferase, putative, expressed                                              | Chr10 | 15884727 | 15893608 - | 14 | 3016 | 6.23  |
| LOC_Os03g08470.2 | AP2 domain containing protein, expressed                                                 | Chr3  | 4348670  | 4350541 -  | 2  | 1827 | -4.09 |
| LOC_Os06g20310.4 | expressed protein                                                                        | Chr6  | 11669578 | 11673430 - | 6  | 3085 | 3.77  |
| LOC_Os01g69040.1 | zinc finger, C3HC4 type domain containing protein, expressed                             | Chr1  | 40115907 | 40121114 + | 5  | 1434 | 6.58  |
| LOC_Os02g42520.2 | dehydrogenase, putative, expressed                                                       | Chr2  | 25565860 | 25569036 - | 10 | 2040 | -4.59 |
| LOC_Os07g37810.1 | STRUBBELIG-RECEPTOR FAMILY 1 precursor, putative, expressed                              | Chr7  | 22671412 | 22676749 - | 18 | 3536 | 4.09  |
| LOC_Os07g37810.2 | STRUBBELIG-RECEPTOR FAMILY 1 precursor, putative, expressed                              | Chr7  | 22671412 | 22676749 - | 18 | 3533 | 4.09  |
| LOC_Os02g38750.1 | expressed protein                                                                        | Chr2  | 23417599 | 23418756 - | 4  | 401  | 4.04  |
| LOC_Os01g10504.1 | OsMADS3 - MADS-box family gene with MIKcC type-box, expressed                            | Chr1  | 5560199  | 5568844 -  | 9  | 1475 | 4.90  |
| LOC_Os03g62720.3 | exosome complex exonuclease, putative, expressed                                         | Chr3  | 35494059 | 35497784 + | 6  | 1880 | 4.19  |
| LOC_Os05g38260.1 | retrotransposon protein, putative, unclassified, expressed                               | Chr5  | 22430406 | 22435175 - | 4  | 4106 | 6.17  |
| LOC_Os01g10504.3 | OsMADS3 - MADS-box family gene with MIKcC type-box, expressed                            | Chr1  | 5560202  | 5568844 -  | 9  | 1476 | 4.90  |
| LOC_Os12g07270.1 | bile acid sodium symporter family protein, putative, expressed                           | Chr12 | 3573433  | 3576997 -  | 7  | 1683 | 6.56  |
| LOC_Os03g56840.1 | GTP-binding protein, putative, expressed                                                 | Chr3  | 32384812 | 32388231 - | 11 | 2100 | 5.08  |
| LOC_Os11g14525.1 | expressed protein                                                                        | Chr11 | 8158799  | 8159473 -  | 1  | 707  | 4.29  |
| LOC_Os05g37160.1 | tubulin/FtsZ domain containing protein, putative, expressed                              | Chr5  | 21711920 | 21715654 - | 8  | 2255 | 3.69  |
| LOC_Os01g67720.4 | ABC1 family domain containing protein, putative, expressed                               | Chr1  | 39359392 | 39362884 - | 7  | 1713 | 6.06  |
| LOC_Os06g20440.1 | transposon protein, putative, CACTA, En/Spm sub-class, expressed                         | Chr6  | 11742656 | 11746429 - | 9  | 1554 | 4.47  |
| LOC_Os01g67520.2 | VTC2, putative, expressed                                                                | Chr1  | 39244417 | 39247231 + | 5  | 2601 | 6.25  |
| LOC_Os03g62160.1 | expressed protein                                                                        | Chr3  | 35208499 | 35211351 - | 8  | 1332 | 4.16  |
| LOC_Os04g58140.2 | elongation factor Tu, putative, expressed                                                | Chr4  | 34626374 | 34631340 - | 11 | 3374 | 5.49  |
| LOC_Os01g33230.1 | UDP-N-acetylglucosamine--N-acetylmuramyl-pyrophosphor yl-undecaprenol N-acetylglucosamin | Chr1  | 18298135 | 18303981 - | 3  | 3263 | 4.60  |
| LOC_Os11g46070.1 | MLA10, putative, expressed                                                               | Chr11 | 27884593 | 27890936 + | 4  | 3633 | 5.38  |
| LOC_Os01g52780.1 | HVA22, putative, expressed                                                               | Chr1  | 30363062 | 30370212 - | 9  | 4737 | 6.38  |
| LOC_Os07g14350.2 | methyltransferase, putative, expressed                                                   | Chr7  | 8194024  | 8198873 +  | 6  | 1576 | 4.58  |
| LOC_Os03g62160.2 | expressed protein                                                                        | Chr3  | 35208499 | 35211351 - | 8  | 1335 | 4.16  |
| LOC_Os03g60880.1 | nucleobase-ascorbate transporter, putative, expressed                                    | Chr3  | 34597354 | 34601212 - | 14 | 2577 | 4.82  |
| LOC_Os03g46750.1 | GPI mannosyltransferase 1, putative, expressed                                           | Chr3  | 26448826 | 26451482 + | 4  | 1829 | 4.40  |
| LOC_Os11g46070.3 | MLA10, putative, expressed                                                               | Chr11 | 27884593 | 27890936 + | 4  | 3636 | 5.38  |
| LOC_Os10g37770.1 | dehydration response related protein, putative, expressed                                | Chr10 | 20210953 | 20214287 - | 6  | 2161 | -7.06 |
| LOC_Os02g02520.1 | expressed protein                                                                        | Chr2  | 896074   | 900377 +   | 12 | 1872 | 6.46  |
| LOC_Os01g10280.4 | phosphoribosylaminoimidazole carboxylase, chloroplast precursor, putative, expressed     | Chr1  | 5406048  | 5412768 +  | 16 | 3203 | 5.40  |
| LOC_Os06g01760.2 | ligA, putative, expressed                                                                | Chr6  | 438684   | 441170 -   | 2  | 2133 | -5.13 |
| LOC_Os02g04420.1 | expressed protein                                                                        | Chr2  | 1946071  | 1949388 -  | 2  | 3253 | 4.68  |
| LOC_Os06g49460.1 | Rer1 protein, putative, expressed                                                        | Chr6  | 29967952 | 29970514 + | 3  | 1325 | 5.95  |
| LOC_Os03g08470.3 | AP2 domain containing protein, expressed                                                 | Chr3  | 4348670  | 4350541 -  | 3  | 1772 | -4.09 |
| LOC_Os10g22730.3 | expressed protein                                                                        | Chr10 | 11807240 | 11813233 - | 12 | 2645 | 6.46  |
| LOC_Os05g35440.2 | serine hydroxymethyltransferase, mitochondrial precursor, putative, expressed            | Chr5  | 21049784 | 21054702 - | 7  | 3164 | 5.27  |
| LOC_Os12g41290.1 | Spc97 / Spc98 family protein, putative, expressed                                        | Chr12 | 25604984 | 25611580 + | 17 | 3932 | 4.53  |
| LOC_Os05g01300.1 | expressed protein                                                                        | Chr5  | 195354   | 197342 -   | 2  | 1487 | 4.66  |
| LOC_Os11g12000.1 | NBS-LRR disease resistance protein, putative, expressed                                  | Chr11 | 6668507  | 6681159 +  | 3  | 3645 | -5.26 |
| LOC_Os11g04370.1 | ribosomal protein L24, putative, expressed                                               | Chr11 | 1813628  | 1816761 -  | 5  | 1087 | 4.76  |
| LOC_Os04g41510.1 | serine/threonine-protein kinase GCN2, putative, expressed                                | Chr4  | 24615554 | 24624651 + | 18 | 3417 | 5.53  |

|                  |                                                                                                  |       |          |            |    |      |       |
|------------------|--------------------------------------------------------------------------------------------------|-------|----------|------------|----|------|-------|
| LOC_Os07g05084.1 | expressed protein                                                                                | Chr7  | 2243674  | 2245570 +  | 3  | 581  | 4.35  |
| LOC_Os01g63710.3 | CDC6 - Putative DNA replication initiation protein, expressed                                    | Chr1  | 36951117 | 36956735 + | 16 | 4257 | 4.38  |
| LOC_Os04g49440.1 | RNA recognition motif containing protein, putative, expressed                                    | Chr4  | 29499367 | 29500598 + | 3  | 1035 | 3.63  |
| LOC_Os01g54900.1 | lipid-A-disaccharide synthase family protein, expressed                                          | Chr1  | 31568908 | 31575611 - | 8  | 2903 | 5.72  |
| LOC_Os12g28177.1 | ATPase 3, putative, expressed                                                                    | Chr12 | 16640803 | 16642694 + | 1  | 1924 | -8.95 |
| LOC_Os02g04420.3 | expressed protein                                                                                | Chr2  | 1946073  | 1949419 -  | 3  | 3216 | 4.68  |
| LOC_Os03g08470.1 | AP2 domain containing protein, expressed                                                         | Chr3  | 4348671  | 4350541 -  | 3  | 1747 | -4.09 |
| LOC_Os01g50120.1 | expressed protein                                                                                | Chr1  | 28798874 | 28804461 + | 6  | 3844 | 4.76  |
| LOC_Os10g21230.1 | ATP synthase C chain, putative, expressed                                                        | Chr10 | 10839098 | 10839789 + | 2  | 711  | 3.39  |
| LOC_Os03g56840.2 | GTP-binding protein, putative, expressed                                                         | Chr3  | 32384812 | 32388231 - | 10 | 2148 | 5.10  |
| LOC_Os03g46310.1 | expressed protein                                                                                | Chr3  | 26193470 | 26196514 + | 6  | 1160 | 5.27  |
| LOC_Os03g47260.1 | expressed protein                                                                                | Chr3  | 26740661 | 26741589 + | 1  | 961  | 3.59  |
| LOC_Os04g22130.1 | conserved hypothetical protein                                                                   | Chr4  | 12545918 | 12546169 - | 1  | 284  | 3.37  |
| LOC_Os01g69040.2 | zinc finger, C3HC4 type domain containing protein, expressed                                     | Chr1  | 40115909 | 40121114 + | 4  | 1482 | 6.58  |
| LOC_Os07g12490.1 | KH domain containing protein, putative, expressed                                                | Chr7  | 7120719  | 7126458 +  | 7  | 1704 | 4.68  |
| LOC_Os01g72900.1 | abscisic stress-ripening, putative, expressed                                                    | Chr1  | 42281272 | 42281973 - | 2  | 635  | 4.81  |
| LOC_Os02g38494.1 | protein phosphatase 2C, putative, expressed                                                      | Chr2  | 23279868 | 23285375 + | 11 | 2057 | 6.47  |
| LOC_Os05g38490.1 | growth regulator related protein, putative, expressed                                            | Chr5  | 22580337 | 22586442 + | 11 | 2044 | 4.94  |
| LOC_Os07g35985.1 | expressed protein                                                                                | Chr7  | 21524199 | 21528261 - | 2  | 3218 | 5.30  |
| LOC_Os12g28137.1 | ATPase 3, putative, expressed                                                                    | Chr12 | 16616739 | 16618725 + | 1  | 2019 | -8.95 |
| LOC_Os10g22730.1 | expressed protein                                                                                | Chr10 | 11807240 | 11813233 - | 11 | 2333 | 6.53  |
| LOC_Os10g35570.1 | expressed protein                                                                                | Chr10 | 19028120 | 19033623 + | 12 | 2175 | 5.03  |
| LOC_Os01g12840.1 | expressed protein                                                                                | Chr1  | 7104273  | 7109141 -  | 5  | 3278 | 4.88  |
| LOC_Os05g49220.1 | GTP-binding protein, putative, expressed                                                         | Chr5  | 28243253 | 28244772 - | 5  | 1256 | 4.08  |
| LOC_Os06g05630.3 | GDSL-like lipase/acylhydrolase, putative, expressed                                              | Chr6  | 2546688  | 2549257 +  | 4  | 1987 | 4.25  |
| LOC_Os11g14170.1 | OsDegp12 - Putative Deg protease homologue, expressed                                            | Chr11 | 7909213  | 7917123 +  | 10 | 2003 | 6.25  |
| LOC_Os11g05394.2 | nucampholin, putative, expressed                                                                 | Chr11 | 2418477  | 2423365 -  | 9  | 3123 | 4.56  |
| LOC_Os05g20914.2 | expressed protein                                                                                | Chr5  | 12293920 | 12297797 + | 6  | 1373 | 5.77  |
| LOC_Os09g24980.1 | vesicle transport v-SNARE protein, putative, expressed                                           | Chr9  | 14921682 | 14926306 - | 5  | 1268 | 5.71  |
| LOC_Os01g17170.1 | magnesium-protoporphyrin IX monomethyl ester cyclase, chloroplast precursor, putative, expressed | Chr1  | 9874326  | 9876951 +  | 5  | 2171 | 4.28  |
| LOC_Os11g29810.1 | expressed protein                                                                                | Chr11 | 17298810 | 17299535 + | 1  | 758  | 4.48  |
| LOC_Os01g39600.1 | expressed protein                                                                                | Chr1  | 22337346 | 22341478 - | 4  | 3033 | 4.60  |
| LOC_Os05g34550.1 | MLO domain containing protein, putative, expressed                                               | Chr5  | 20484912 | 20490183 - | 13 | 2534 | 4.90  |
| LOC_Os02g30800.1 | POLE1 - Putative DNA polymerase epsilon catalytic subunit, expressed                             | Chr2  | 18348888 | 18370959 + | 50 | 8461 | 5.08  |
| LOC_Os10g02760.1 | hydroxyproline-rich glycoprotein family protein, putative, expressed                             | Chr10 | 1085169  | 1089548 -  | 8  | 2621 | 5.69  |
| LOC_Os04g11400.2 | expressed protein                                                                                | Chr4  | 6231633  | 6232479 -  | 2  | 793  | -5.86 |
| LOC_Os07g08880.3 | ES43 protein, putative, expressed                                                                | Chr7  | 4606679  | 4614599 +  | 5  | 1361 | 5.44  |
| LOC_Os10g02760.2 | hydroxyproline-rich glycoprotein family protein, putative, expressed                             | Chr10 | 1085169  | 1089548 -  | 8  | 2618 | 5.69  |
| LOC_Os07g12490.2 | KH domain containing protein, putative, expressed                                                | Chr7  | 7120954  | 7126458 +  | 6  | 1597 | 4.68  |
| LOC_Os03g16080.1 | mitochondrial carrier protein, putative, expressed                                               | Chr3  | 8865964  | 8869220 +  | 7  | 1952 | 5.38  |
| LOC_Os08g30020.6 | membrane protein, putative, expressed                                                            | Chr8  | 18452698 | 18456676 + | 8  | 1631 | -7.15 |
| LOC_Os05g34550.2 | MLO domain containing protein, putative, expressed                                               | Chr5  | 20484912 | 20490183 - | 13 | 2542 | 4.90  |
| LOC_Os03g60880.5 | nucleobase-ascorbate transporter, putative, expressed                                            | Chr3  | 34597354 | 34601212 - | 13 | 2636 | 4.82  |
| LOC_Os02g01710.1 | peptidase family C78 domain containing protein, expressed                                        | Chr2  | 391819   | 395803 +   | 7  | 3191 | 5.03  |
| LOC_Os08g38320.2 | AGC_PVPK_like_kin82y.14 - ACG kinases include homologs to PKA, PKG and PKC, expressed            | Chr8  | 24274676 | 24277516 + | 3  | 2450 | 6.12  |

|                  |                                                                                             |       |          |            |    |      |      |
|------------------|---------------------------------------------------------------------------------------------|-------|----------|------------|----|------|------|
| LOC_Os01g69030.1 | sucrose-phosphate synthase, putative, expressed                                             | Chr1  | 40101404 | 40107116 - | 13 | 4155 | 6.53 |
| LOC_Os03g60880.3 | nucleobase-ascorbate transporter, putative, expressed                                       | Chr3  | 34597354 | 34601212 - | 13 | 2643 | 4.82 |
| LOC_Os02g02560.1 | UTP--glucose-1-phosphate uridylyltransferase, putative, expressed                           | Chr2  | 926031   | 929945 -   | 20 | 2423 | 4.80 |
| LOC_Os08g19250.1 | retrotransposon protein, putative, Ty1-copia subclass, expressed                            | Chr8  | 11512329 | 11518809 - | 6  | 3300 | 5.63 |
| LOC_Os02g30150.1 | disease resistance protein, putative, expressed                                             | Chr2  | 17910631 | 17915473 + | 2  | 4387 | 5.10 |
| LOC_Os12g42730.3 | mov34/MPN/PAD-1 family protein, expressed                                                   | Chr12 | 26548383 | 26555964 + | 13 | 2822 | 5.62 |
| LOC_Os03g51510.2 | ribosomal protein L6, putative, expressed                                                   | Chr3  | 29462922 | 29465818 + | 2  | 1130 | 5.19 |
| LOC_Os02g44740.1 | expressed protein                                                                           | Chr2  | 27105464 | 27110709 - | 3  | 1821 | 4.06 |
| LOC_Os06g05830.1 | protein kinase domain containing protein, expressed                                         | Chr6  | 2660850  | 2663464 -  | 2  | 2586 | 4.85 |
| LOC_Os01g25600.2 | tetratricopeptide repeat domain containing protein, expressed                               | Chr1  | 14507658 | 14513133 - | 7  | 2388 | 5.18 |
| LOC_Os11g05394.1 | nucampholin, putative, expressed                                                            | Chr11 | 2418477  | 2423363 -  | 10 | 3059 | 4.56 |
| LOC_Os04g06790.3 | 2-aminoethanethiol dioxygenase, putative, expressed                                         | Chr4  | 3575300  | 3581634 -  | 6  | 1964 | 5.21 |
| LOC_Os07g08880.2 | ES43 protein, putative, expressed                                                           | Chr7  | 4606679  | 4614598 +  | 5  | 1376 | 5.44 |
| LOC_Os08g35630.1 | MTD1, putative, expressed                                                                   | Chr8  | 22462394 | 22464896 + | 2  | 1126 | 3.76 |
| LOC_Os05g45310.1 | ER lumen protein retaining receptor, putative, expressed                                    | Chr5  | 26288908 | 26291990 - | 6  | 1470 | 5.29 |
| LOC_Os03g18210.1 | basic helix-loop-helix, putative, expressed                                                 | Chr3  | 10212391 | 10215769 + | 6  | 2732 | 4.48 |
| LOC_Os04g33970.1 | 2-Cys peroxiredoxin BAS1, chloroplast precursor, putative, expressed                        | Chr4  | 20559966 | 20564907 + | 7  | 1615 | 5.57 |
| LOC_Os12g03500.2 | expressed protein                                                                           | Chr12 | 1387551  | 1391278 -  | 3  | 1251 | 4.48 |
| LOC_Os06g36690.1 | retrotransposon protein, putative, unclassified                                             | Chr6  | 21576294 | 21576548 - | 1  | 287  | 3.02 |
| LOC_Os01g47820.1 | S-locus-like receptor protein kinase, putative, expressed                                   | Chr1  | 27375305 | 27377729 - | 1  | 2457 | 5.03 |
| LOC_Os08g30554.1 | expressed protein                                                                           | Chr8  | 18821265 | 18821963 + | 1  | 731  | 3.57 |
| LOC_Os12g30610.1 | expressed protein                                                                           | Chr12 | 18383645 | 18385743 + | 1  | 2131 | 3.99 |
| LOC_Os07g08880.1 | ES43 protein, putative, expressed                                                           | Chr7  | 4606679  | 4614599 +  | 5  | 1380 | 5.44 |
| LOC_Os06g03840.1 | H-BTB4 - Bric-a-Brac, Tramtrack, Broad Complex BTB domain with H family conserved sequence, | Chr6  | 1544044  | 1546216 -  | 2  | 1911 | 4.57 |
| LOC_Os04g33700.1 | ABC transmembrane transporter domain containing protein, expressed                          | Chr4  | 20406006 | 20410406 - | 10 | 2369 | 4.75 |
| LOC_Os01g50032.1 | expressed protein                                                                           | Chr1  | 28740236 | 28744474 + | 13 | 2009 | 7.56 |
| LOC_Os03g51510.1 | ribosomal protein L6, putative, expressed                                                   | Chr3  | 29462922 | 29465818 + | 2  | 1138 | 5.19 |
| LOC_Os10g41710.1 | chaperonin, putative, expressed                                                             | Chr10 | 22453063 | 22456636 + | 6  | 1096 | 5.33 |
| LOC_Os12g42730.4 | mov34/MPN/PAD-1 family protein, expressed                                                   | Chr12 | 26548383 | 26557618 + | 14 | 2783 | 5.62 |
| LOC_Os04g06790.2 | 2-aminoethanethiol dioxygenase, putative, expressed                                         | Chr4  | 3575300  | 3581634 -  | 7  | 1903 | 5.21 |
| LOC_Os04g33810.1 | RNA recognition motif containing protein, putative, expressed                               | Chr4  | 20484158 | 20485720 + | 4  | 1133 | 4.42 |
| LOC_Os01g69030.3 | sucrose-phosphate synthase, putative, expressed                                             | Chr1  | 40101404 | 40107104 - | 12 | 4185 | 6.53 |
| LOC_Os01g50930.2 | expressed protein                                                                           | Chr1  | 29240064 | 29246877 - | 3  | 943  | 3.81 |
| LOC_Os01g72780.1 | expressed protein                                                                           | Chr1  | 42216976 | 42228070 + | 18 | 4651 | 5.12 |
| LOC_Os01g69030.4 | sucrose-phosphate synthase, putative, expressed                                             | Chr1  | 40101404 | 40107186 - | 13 | 4187 | 6.53 |
| LOC_Os11g05180.2 | expressed protein                                                                           | Chr11 | 2278737  | 2281615 +  | 3  | 2620 | 4.45 |
| LOC_Os05g35274.5 | RNA recognition motif containing protein, putative, expressed                               | Chr5  | 20949221 | 20951377 - | 2  | 667  | 5.93 |
| LOC_Os03g32526.1 | tRNA-splicing endonuclease positive effector-related, putative, expressed                   | Chr3  | 18602727 | 18608700 - | 20 | 3460 | 6.01 |
| LOC_Os01g58290.1 | OsSub9 - Putative Subtilisin homologue, expressed                                           | Chr1  | 33691773 | 33696746 + | 10 | 3092 | 4.73 |
| LOC_Os06g27800.1 | tm-1GCR237 protein, putative, expressed                                                     | Chr6  | 15738385 | 15744846 + | 9  | 2935 | 4.15 |
| LOC_Os05g28200.1 | prenyltransferase, putative, expressed                                                      | Chr5  | 16512069 | 16517848 + | 15 | 2222 | 6.32 |
| LOC_Os08g38320.3 | AGC_PVPK_like_kin82y.14 - ACG kinases include homologs to PKA, PKG and PKC, expressed       | Chr8  | 24274360 | 24277516 + | 3  | 2486 | 6.12 |
| LOC_Os05g07900.1 | mitochondrial carrier protein, putative, expressed                                          | Chr5  | 4266371  | 4270255 +  | 4  | 2223 | 4.92 |
| LOC_Os06g27800.2 | tm-1GCR237 protein, putative, expressed                                                     | Chr6  | 15738394 | 15744794 + | 10 | 2874 | 4.15 |
| LOC_Os01g03040.1 | expressed protein                                                                           | Chr1  | 1160152  | 1164635 -  | 4  | 1177 | 5.41 |

|                  |                                                                            |       |          |            |    |      |       |
|------------------|----------------------------------------------------------------------------|-------|----------|------------|----|------|-------|
| LOC_Os07g42260.1 | peptidase, T1 family, putative, expressed                                  | Chr7  | 25289256 | 25293793 - | 9  | 1950 | 6.16  |
| LOC_Os02g51480.1 | PPR repeat domain containing protein, putative, expressed                  | Chr2  | 31529599 | 31531859 + | 2  | 1997 | 4.07  |
| LOC_Os02g53360.1 | expressed protein                                                          | Chr2  | 32666343 | 32668045 - | 3  | 957  | 3.90  |
| LOC_Os04g51794.2 | DNA binding protein, putative, expressed                                   | Chr4  | 30690623 | 30696691 - | 11 | 2374 | 5.24  |
| LOC_Os01g68480.1 | thioredoxin, putative, expressed                                           | Chr1  | 39794226 | 39795811 + | 3  | 1366 | 5.26  |
| LOC_Os04g44100.1 | expressed protein                                                          | Chr4  | 26111637 | 26113913 + | 2  | 1131 | 4.39  |
| LOC_Os10g40920.1 | pentatricopeptide, putative, expressed                                     | Chr10 | 21983939 | 21987321 + | 1  | 3415 | 5.72  |
| LOC_Os02g42520.3 | dehydrogenase, putative, expressed                                         | Chr2  | 25565860 | 25569036 - | 9  | 2091 | -4.60 |
| LOC_Os09g29660.1 | white-brown complex homolog protein 11, putative, expressed                | Chr9  | 18034121 | 18039233 + | 8  | 2722 | -6.08 |
| LOC_Os01g69030.2 | sucrose-phosphate synthase, putative, expressed                            | Chr1  | 40101404 | 40107186 - | 13 | 4221 | 6.53  |
| LOC_Os02g04330.2 | 5-AMP-activated protein kinase beta-1 subunit-related, putative, expressed | Chr2  | 1908973  | 1912809 +  | 10 | 1670 | 4.71  |
| LOC_Os03g17920.3 | RNA pseudouridine synthase, putative, expressed                            | Chr3  | 9981700  | 9986677 +  | 7  | 3440 | 5.56  |
| LOC_Os10g42754.1 | expressed protein                                                          | Chr10 | 23066471 | 23069754 - | 6  | 1665 | 5.36  |
| LOC_Os04g48170.1 | cytochrome P450, putative, expressed                                       | Chr4  | 28672747 | 28677225 - | 9  | 2473 | 4.52  |
| LOC_Os10g12480.1 | transposon protein, putative, CACTA, En/Spm sub-class, expressed           | Chr10 | 6937004  | 6938958 +  | 4  | 1826 | 5.70  |
| LOC_Os08g08140.1 | receptor-like kinase, putative, expressed                                  | Chr8  | 4631720  | 4638679 +  | 13 | 3713 | 5.10  |
| LOC_Os08g26260.1 | retrotransposon protein, putative, Ty3-gypsy subclass, expressed           | Chr8  | 16008797 | 16011637 + | 2  | 1448 | 3.88  |
| LOC_Os12g42730.2 | mov34/MPN/PAD-1 family protein, expressed                                  | Chr12 | 26551391 | 26555881 + | 10 | 2005 | 5.57  |
| LOC_Os03g03860.2 | expressed protein                                                          | Chr3  | 1737565  | 1741468 -  | 5  | 3113 | 4.01  |
| LOC_Os06g12680.1 | RING-H2 finger protein, putative, expressed                                | Chr6  | 6923215  | 6924997 -  | 1  | 1815 | 6.61  |
| LOC_Os03g52130.1 | expressed protein                                                          | Chr3  | 29931355 | 29932698 + | 3  | 811  | 5.37  |
| LOC_Os08g38910.4 | caffeoyl-CoA O-methyltransferase, putative, expressed                      | Chr8  | 24592945 | 24594495 - | 2  | 1531 | 5.66  |
| LOC_Os01g73300.1 | VAMP-like protein YKT62, putative, expressed                               | Chr1  | 42479663 | 42483372 - | 6  | 1312 | 3.94  |
| LOC_Os11g09460.1 | expressed protein                                                          | Chr11 | 5073932  | 5074811 -  | 2  | 796  | 3.85  |
| LOC_Os08g41850.1 | expressed protein                                                          | Chr8  | 26430703 | 26432939 - | 3  | 987  | 4.80  |
| LOC_Os06g05010.1 | early nodulin 93 ENOD93 protein, putative, expressed                       | Chr6  | 2208673  | 2209562 -  | 3  | 762  | 3.36  |
| LOC_Os07g42490.1 | sucrose synthase, putative, expressed                                      | Chr7  | 25429639 | 25435182 + | 16 | 3332 | 5.05  |
| LOC_Os12g42730.1 | mov34/MPN/PAD-1 family protein, expressed                                  | Chr12 | 26551391 | 26555964 + | 11 | 2285 | 5.62  |
| LOC_Os03g33580.1 | mitotic checkpoint protein, putative, expressed                            | Chr3  | 19183831 | 19191338 - | 9  | 1917 | 4.92  |
| LOC_Os09g09980.1 | glucan endo-1,3-beta-glucosidase precursor, putative, expressed            | Chr9  | 5430895  | 5433234 +  | 2  | 1907 | 5.80  |
| LOC_Os02g55520.2 | zinc finger, C3HC4 type domain containing protein, expressed               | Chr2  | 33990620 | 33996854 - | 6  | 2639 | 4.02  |
| LOC_Os04g43430.3 | pentatricopeptide, putative, expressed                                     | Chr4  | 25703701 | 25707426 - | 2  | 3660 | 4.83  |
| LOC_Os03g52640.3 | expressed protein                                                          | Chr3  | 30189341 | 30191568 - | 5  | 1327 | 4.46  |
| LOC_Os01g58290.4 | OsSub9 - Putative Subtilisin homologue, expressed                          | Chr1  | 33691773 | 33696746 + | 9  | 3160 | 4.73  |
| LOC_Os06g08540.2 | formin-like protein 13, putative, expressed                                | Chr6  | 4224295  | 4228006 +  | 4  | 2300 | 4.24  |
| LOC_Os08g09210.2 | phosphoribosylamine-glycine ligase, putative, expressed                    | Chr8  | 5341430  | 5345421 +  | 5  | 2475 | 6.43  |
| LOC_Os04g41300.1 | ribosome recycling factor, putative, expressed                             | Chr4  | 24505544 | 24508402 - | 8  | 1450 | 4.72  |
| LOC_Os09g24954.3 | double-stranded RNA binding motif containing protein, expressed            | Chr9  | 14896179 | 14901415 + | 5  | 1108 | 5.70  |
| LOC_Os12g36900.1 | drought induced 19 protein, putative, expressed                            | Chr12 | 22616762 | 22622376 + | 5  | 1721 | 6.10  |
| LOC_Os06g22829.2 | expressed protein                                                          | Chr6  | 13314442 | 13318310 - | 4  | 1049 | 3.81  |
| LOC_Os09g02130.1 | expressed protein                                                          | Chr9  | 799487   | 806530 +   | 7  | 1557 | 5.94  |
| LOC_Os03g06760.1 | exocyst complex component 6, putative, expressed                           | Chr3  | 3435736  | 3439544 +  | 2  | 2953 | 4.49  |
| LOC_Os11g43510.1 | lipase precursor, putative, expressed                                      | Chr11 | 26263726 | 26267156 + | 10 | 1751 | 3.97  |
| LOC_Os04g42880.1 | WD domain, G-beta repeat domain containing protein, expressed              | Chr4  | 25374638 | 25376829 + | 2  | 1619 | 6.21  |
| LOC_Os08g09210.1 | phosphoribosylamine-glycine ligase, putative, expressed                    | Chr8  | 5341430  | 5345421 +  | 5  | 2480 | 6.43  |

|                  |                                                                         |       |          |            |    |      |       |
|------------------|-------------------------------------------------------------------------|-------|----------|------------|----|------|-------|
| LOC_Os03g48170.1 | 5-AMP-activated protein kinase-related, putative, expressed             | Chr3  | 27408274 | 27413242 + | 9  | 2355 | 5.26  |
| LOC_Os09g36750.2 | L-ascorbate peroxidase 4, putative, expressed                           | Chr9  | 21199731 | 21202763 - | 5  | 996  | 5.23  |
| LOC_Os01g51210.1 | uncharacterized protein PA4923, putative, expressed                     | Chr1  | 29437276 | 29439882 - | 7  | 1388 | 3.96  |
| LOC_Os01g40420.1 | CBS domain containing membrane protein, putative, expressed             | Chr1  | 22820235 | 22823182 - | 6  | 2056 | 4.79  |
| LOC_Os03g52630.1 | endoglucanase, putative, expressed                                      | Chr3  | 30181636 | 30185153 - | 6  | 2738 | -3.32 |
| LOC_Os06g23040.1 | expressed protein                                                       | Chr6  | 13440852 | 13442506 + | 4  | 794  | 3.53  |
| LOC_Os01g14870.1 | zinc finger matrin-type protein 5, putative, expressed                  | Chr1  | 8334519  | 8338574 +  | 5  | 1883 | 4.90  |
| LOC_Os04g58380.1 | expressed protein                                                       | Chr4  | 34733596 | 34736093 - | 5  | 1106 | 4.10  |
| LOC_Os09g28480.1 | expressed protein                                                       | Chr9  | 17324424 | 17329001 + | 3  | 2736 | 5.67  |
| LOC_Os05g07900.2 | mitochondrial carrier protein, putative, expressed                      | Chr5  | 4266371  | 4270238 +  | 4  | 2303 | 4.92  |
| LOC_Os07g33210.1 | expressed protein                                                       | Chr7  | 19838576 | 19842588 + | 8  | 1795 | 4.63  |
| LOC_Os06g01760.1 | ligA, putative, expressed                                               | Chr6  | 438684   | 441553 -   | 2  | 2287 | -5.06 |
| LOC_Os06g30480.1 | expressed protein                                                       | Chr6  | 17617357 | 17618966 - | 2  | 1475 | -4.24 |
| LOC_Os03g62040.1 | retrotransposon protein, putative, unclassified, expressed              | Chr3  | 35150338 | 35153150 + | 3  | 2646 | 5.09  |
| LOC_Os06g27540.1 | retrotransposon protein, putative, unclassified, expressed              | Chr6  | 15589924 | 15594920 + | 7  | 3434 | 5.09  |
| LOC_Os06g05010.2 | early nodulin 93 ENOD93 protein, putative, expressed                    | Chr6  | 2208721  | 2209561 -  | 2  | 791  | 3.36  |
| LOC_Os01g49340.1 | arginine/serine-rich coiled-coil protein 1, putative, expressed         | Chr1  | 28367976 | 28370532 - | 6  | 1588 | 5.43  |
| LOC_Os08g30440.1 | expressed protein                                                       | Chr8  | 18735538 | 18738618 - | 5  | 877  | 3.81  |
| LOC_Os02g36960.2 | choline transporter-related, putative, expressed                        | Chr2  | 22327984 | 22331805 - | 5  | 1742 | 4.15  |
| LOC_Os01g53200.1 | flavin monooxygenase, putative, expressed                               | Chr1  | 30561145 | 30564493 + | 4  | 2155 | 5.64  |
| LOC_Os02g04260.1 | expressed protein                                                       | Chr2  | 1878983  | 1882476 -  | 6  | 1754 | 5.21  |
| LOC_Os10g21460.1 | expressed protein                                                       | Chr10 | 10988248 | 10992677 + | 7  | 1736 | 4.56  |
| LOC_Os07g28260.4 | expressed protein                                                       | Chr7  | 16512509 | 16521416 + | 17 | 5897 | 4.00  |
| LOC_Os06g45140.3 | bZIP transcription factor domain containing protein, expressed          | Chr6  | 27299914 | 27302140 - | 5  | 1590 | 6.06  |
| LOC_Os05g08950.1 | phosphoribosyl transferase, putative, expressed                         | Chr5  | 4947678  | 4951874 -  | 3  | 1257 | 4.25  |
| LOC_Os02g51404.1 | expressed protein                                                       | Chr2  | 31483913 | 31484499 - | 1  | 619  | 3.48  |
| LOC_Os10g35800.1 | expressed protein                                                       | Chr10 | 19146523 | 19148586 + | 2  | 2033 | 6.89  |
| LOC_Os08g21330.3 | formamidopyrimidine-DNA glycosylase, putative, expressed                | Chr8  | 12710873 | 12719471 + | 9  | 2381 | 5.37  |
| LOC_Os09g07020.1 | oxidoreductase, putative, expressed                                     | Chr9  | 3404354  | 3408176 -  | 12 | 1983 | 5.20  |
| LOC_Os09g07020.2 | oxidoreductase, putative, expressed                                     | Chr9  | 3404354  | 3408176 -  | 12 | 1980 | 5.20  |
| LOC_Os04g44810.1 | syntaxin-18, putative, expressed                                        | Chr4  | 26528479 | 26531710 + | 7  | 1579 | 4.30  |
| LOC_Os01g59100.1 | cytokinin-N-glucoyltransferase 1, putative, expressed                   | Chr1  | 34141403 | 34145203 + | 2  | 2136 | 4.98  |
| LOC_Os02g02770.1 | PPR repeat domain containing protein, putative, expressed               | Chr2  | 1047595  | 1050120 -  | 2  | 2490 | 6.07  |
| LOC_Os01g05940.1 | receptor kinase, putative, expressed                                    | Chr1  | 2830325  | 2836425 +  | 8  | 4489 | 5.74  |
| LOC_Os03g38500.1 | expressed protein                                                       | Chr3  | 21371243 | 21375804 + | 4  | 792  | 5.31  |
| LOC_Os01g33514.3 | expressed protein                                                       | Chr1  | 18446990 | 18448953 + | 3  | 1137 | 4.62  |
| LOC_Os01g65660.1 | amino acid transporter, putative, expressed                             | Chr1  | 38117301 | 38120760 - | 6  | 2661 | 3.73  |
| LOC_Os02g12480.6 | expressed protein                                                       | Chr2  | 6508832  | 6513830 -  | 2  | 3565 | -4.25 |
| LOC_Os02g48390.1 | phosphoribosyl transferase, putative, expressed                         | Chr2  | 29625456 | 29628118 + | 6  | 2017 | -3.99 |
| LOC_Os02g01110.1 | translation initiation factor IF-3, putative, expressed                 | Chr2  | 59280    | 64726 +    | 8  | 2311 | 4.05  |
| LOC_Os04g50208.2 | phosphoenolpyruvate carboxykinase, putative, expressed                  | Chr4  | 29969234 | 29972696 - | 9  | 2227 | 6.79  |
| LOC_Os02g35750.3 | pentatricopeptide repeat domain containing protein, putative, expressed | Chr2  | 21472360 | 21475633 + | 3  | 1733 | 6.38  |
| LOC_Os03g02840.1 | remorin family protein, putative, expressed                             | Chr3  | 1109242  | 1113045 -  | 6  | 1774 | 3.60  |
| LOC_Os07g37010.1 | cyclin, putative, expressed                                             | Chr7  | 22169511 | 22171932 - | 6  | 1852 | 3.83  |
| LOC_Os04g51794.1 | DNA binding protein, putative, expressed                                | Chr4  | 30690623 | 30696691 - | 10 | 2548 | 5.28  |

|                  |                                                                                      |       |          |            |    |      |       |
|------------------|--------------------------------------------------------------------------------------|-------|----------|------------|----|------|-------|
| LOC_Os06g29790.1 | phosphate transporter 1, putative, expressed                                         | Chr6  | 17130053 | 17134973 + | 14 | 3384 | 4.68  |
| LOC_Os07g10300.3 | expressed protein                                                                    | Chr7  | 5521609  | 5526698 +  | 7  | 2020 | 5.42  |
| LOC_Os01g13530.1 | ABIL2, putative, expressed                                                           | Chr1  | 7557172  | 7560626 +  | 9  | 2026 | 4.70  |
| LOC_Os02g55520.1 | zinc finger, C3HC4 type domain containing protein, expressed                         | Chr2  | 33990620 | 33996854 - | 6  | 2663 | 4.05  |
| LOC_Os10g36670.1 | expressed protein                                                                    | Chr10 | 19615205 | 19616026 + | 1  | 854  | 3.42  |
| LOC_Os04g49560.1 | zinc finger family protein, putative, expressed                                      | Chr4  | 29556866 | 29563246 - | 10 | 2519 | 4.35  |
| LOC_Os09g24954.2 | double-stranded RNA binding motif containing protein, expressed                      | Chr9  | 14896175 | 14901415 + | 5  | 1166 | 5.70  |
| LOC_Os04g55650.2 | oryzain alpha chain precursor, putative, expressed                                   | Chr4  | 33123071 | 33126988 - | 4  | 2253 | -3.71 |
| LOC_Os01g58290.2 | OsSub9 - Putative Subtilisin homologue, expressed                                    | Chr1  | 33691773 | 33696746 + | 8  | 3240 | 4.73  |
| LOC_Os01g65660.2 | amino acid transporter, putative, expressed                                          | Chr1  | 38117355 | 38119842 - | 4  | 2223 | 3.73  |
| LOC_Os03g02840.4 | remorin family protein, putative, expressed                                          | Chr3  | 1109242  | 1112730 -  | 6  | 1722 | 3.60  |
| LOC_Os07g06990.1 | expressed protein                                                                    | Chr7  | 3444957  | 3446867 +  | 2  | 1111 | -3.34 |
| LOC_Os04g58190.1 | dof zinc finger domain containing protein, putative, expressed                       | Chr4  | 34655221 | 34656922 - | 2  | 1442 | 3.96  |
| LOC_Os03g44710.2 | YABBY domain containing protein, putative, expressed                                 | Chr3  | 25197057 | 25206961 + | 7  | 1325 | 3.79  |
| LOC_Os04g55650.1 | oryzain alpha chain precursor, putative, expressed                                   | Chr4  | 33123071 | 33126988 - | 5  | 2189 | -3.71 |
| LOC_Os01g46570.2 | CTP synthase, putative, expressed                                                    | Chr1  | 26514543 | 26521116 + | 20 | 2879 | 5.01  |
| LOC_Os05g19270.1 | MSH-like DNA mismatch repair protein, putative, expressed                            | Chr5  | 11189415 | 11198075 + | 13 | 3807 | 5.70  |
| LOC_Os07g25050.1 | thionin-like peptide, putative, expressed                                            | Chr7  | 14292224 | 14292742 + | 2  | 352  | -8.58 |
| LOC_Os08g42730.1 | radical SAM enzyme, putative, expressed                                              | Chr8  | 27034929 | 27038859 + | 6  | 1718 | 4.71  |
| LOC_Os03g61600.1 | phosphoribosylformylglycinamide synthase, putative, expressed                        | Chr3  | 34923862 | 34926706 - | 8  | 1825 | 4.86  |
| LOC_Os10g20020.1 | retrotransposon protein, putative, Ty3-gypsy subclass, expressed                     | Chr10 | 10038518 | 10045242 + | 3  | 5454 | 4.21  |
| LOC_Os08g21330.1 | formamidopyrimidine-DNA glycosylase, putative, expressed                             | Chr8  | 12710873 | 12719471 + | 10 | 2473 | 5.38  |
| LOC_Os03g10820.1 | expressed protein                                                                    | Chr3  | 5547033  | 5551372 +  | 6  | 2017 | 4.04  |
| LOC_Os12g07880.1 | dynamamin family protein, putative, expressed                                        | Chr12 | 3986789  | 3994498 -  | 17 | 3156 | 5.18  |
| LOC_Os04g38640.2 | OsDegp5 - Putative Deg protease homologue, expressed                                 | Chr4  | 22954845 | 22960460 + | 13 | 2102 | 4.81  |
| LOC_Os01g51210.2 | uncharacterized protein PA4923, putative, expressed                                  | Chr1  | 29437276 | 29439881 - | 6  | 1456 | 3.96  |
| LOC_Os09g36750.1 | L-ascorbate peroxidase 4, putative, expressed                                        | Chr9  | 21199731 | 21202763 - | 6  | 947  | 5.19  |
| LOC_Os05g20510.1 | retrotransposon protein, putative, Ty3-gypsy subclass, expressed                     | Chr5  | 12035180 | 12041894 + | 3  | 5478 | 3.88  |
| LOC_Os01g10280.2 | phosphoribosylaminoimidazole carboxylase, chloroplast precursor, putative, expressed | Chr1  | 5406048  | 5412531 +  | 16 | 2679 | 4.69  |
| LOC_Os03g28300.1 | protein kinase domain containing protein, expressed                                  | Chr3  | 16282710 | 16290482 + | 8  | 3506 | -6.36 |
| LOC_Os05g30810.1 | expressed protein                                                                    | Chr5  | 17880779 | 17882248 - | 3  | 832  | 6.38  |
| LOC_Os05g14500.1 | expressed protein                                                                    | Chr5  | 8195720  | 8198339 +  | 4  | 2453 | 3.02  |
| LOC_Os05g30810.2 | expressed protein                                                                    | Chr5  | 17880781 | 17882248 - | 3  | 834  | 6.38  |
| LOC_Os10g19970.1 | expressed protein                                                                    | Chr10 | 10022541 | 10023354 + | 1  | 846  | 3.57  |
| LOC_Os01g65400.3 | DNA polymerase I, putative, expressed                                                | Chr1  | 37955093 | 37958989 - | 6  | 3240 | 7.05  |
| LOC_Os07g11070.1 | DUF630/DUF632 domains containing protein, putative, expressed                        | Chr7  | 6117818  | 6121772 -  | 4  | 2752 | 5.25  |
| LOC_Os11g07124.1 | EFR, putative, expressed                                                             | Chr11 | 3548134  | 3552354 +  | 6  | 3291 | 4.33  |
| LOC_Os08g02670.1 | ATP binding protein, putative, expressed                                             | Chr8  | 1111277  | 1115786 +  | 6  | 3076 | 5.84  |
| LOC_Os07g10300.1 | expressed protein                                                                    | Chr7  | 5521609  | 5526698 +  | 8  | 1912 | 5.42  |
| LOC_Os06g37080.1 | L-ascorbate oxidase precursor, putative, expressed                                   | Chr6  | 21893247 | 21898264 + | 5  | 2273 | 4.82  |
| LOC_Os03g51510.3 | ribosomal protein L6, putative, expressed                                            | Chr3  | 29462922 | 29465818 + | 3  | 1241 | 5.22  |
| LOC_Os10g35470.1 | oxidoreductase, putative, expressed                                                  | Chr10 | 18981326 | 18985212 + | 8  | 1667 | 5.59  |
| LOC_Os12g10184.1 | pentatricopeptide, putative, expressed                                               | Chr12 | 5384958  | 5387143 +  | 1  | 2218 | 4.69  |
| LOC_Os01g33514.2 | expressed protein                                                                    | Chr1  | 18446990 | 18448953 + | 3  | 1099 | 4.57  |
| LOC_Os07g09720.1 | phosphoacetylglucosamine mutase, putative, expressed                                 | Chr7  | 5179086  | 5182752 -  | 8  | 2260 | 4.10  |



|                   |                                                                                                  |       |          |          |   |    |      |       |
|-------------------|--------------------------------------------------------------------------------------------------|-------|----------|----------|---|----|------|-------|
| LOC_Os06g05250.1  | GTP-binding protein GUF1, putative, expressed                                                    | Chr6  | 2366602  | 2372121  | - | 12 | 2964 | 5.66  |
| LOC_Os11g41140.1  | zinc finger, C3HC4 type domain containing protein, expressed                                     | Chr11 | 24648047 | 24651797 | + | 5  | 1738 | -2.96 |
| LOC_Os03g20460.1  | guanylate kinase, putative, expressed                                                            | Chr3  | 11595453 | 11599060 | + | 4  | 1475 | 6.39  |
| LOC_Os03g011150.2 | palmitoyl-protein thioesterase 1 precursor, putative, expressed                                  | Chr3  | 106528   | 110545   | + | 12 | 1637 | -4.54 |
| LOC_Os04g59340.1  | RNA-binding region RNP-1, putative, expressed                                                    | Chr4  | 35280662 | 35282692 | + | 3  | 1601 | 4.68  |
| LOC_Os01g61044.2  | transmembrane amino acid transporter protein, putative, expressed                                | Chr1  | 35320780 | 35327164 | - | 5  | 1972 | 5.51  |
| LOC_Os11g34690.1  | expressed protein                                                                                | Chr11 | 20321331 | 20326421 | + | 9  | 3254 | 6.66  |
| LOC_Os11g37774.1  | stripe rust resistance protein Yr10, putative, expressed                                         | Chr11 | 22351283 | 22356398 | + | 5  | 3154 | -4.69 |
| LOC_Os05g43576.1  | radical SAM enzyme, putative, expressed                                                          | Chr5  | 25343800 | 25346261 | + | 7  | 1703 | 6.14  |
| LOC_Os05g04914.1  | expressed protein                                                                                | Chr5  | 2363742  | 2371823  | - | 5  | 2983 | 4.87  |
| LOC_Os05g48220.2  | 60S ribosomal protein L35a-3, putative, expressed                                                | Chr5  | 27640670 | 27641646 | + | 3  | 841  | 4.66  |
| LOC_Os01g73450.1  | amino acid kinase, putative, expressed                                                           | Chr1  | 42562817 | 42566993 | + | 7  | 1613 | 4.53  |
| LOC_Os01g40590.1  | tyrosine protein kinase domain containing protein, putative, expressed                           | Chr1  | 22918453 | 22923870 | + | 6  | 2821 | 5.34  |
| LOC_Os03g53530.1  | WD domain, G-beta repeat domain containing protein, expressed                                    | Chr3  | 30701238 | 30704661 | - | 10 | 2038 | 4.74  |
| LOC_Os09g19280.1  | retrotransposon protein, putative, unclassified, expressed                                       | Chr9  | 11540747 | 11543436 | - | 3  | 1536 | -5.93 |
| LOC_Os05g43530.1  | CSLC7 - cellulose synthase-like family C, expressed                                              | Chr5  | 25300749 | 25304668 | - | 5  | 2811 | 6.06  |
| LOC_Os04g16940.1  | transposon protein, putative, CACTA, En/Spm sub-class, expressed                                 | Chr4  | 9262696  | 9265370  | - | 5  | 1924 | 4.62  |
| LOC_Os03g011150.1 | palmitoyl-protein thioesterase 1 precursor, putative, expressed                                  | Chr3  | 106514   | 110545   | + | 12 | 1675 | -4.54 |
| LOC_Os06g09090.1  | glutamate receptor 2.8 precursor, putative, expressed                                            | Chr6  | 4571088  | 4574911  | - | 5  | 2177 | 6.85  |
| LOC_Os01g55020.4  | expressed protein                                                                                | Chr1  | 31635565 | 31638417 | + | 3  | 980  | 4.02  |
| LOC_Os08g40919.2  | expressed protein                                                                                | Chr8  | 25889494 | 25893900 | + | 3  | 2953 | 5.23  |
| LOC_Os06g06760.3  | protein kinase, putative, expressed                                                              | Chr6  | 3175775  | 3181762  | - | 10 | 3335 | 5.11  |
| LOC_Os02g37850.2  | expressed protein                                                                                | Chr2  | 22866024 | 22870108 | + | 3  | 1500 | 5.41  |
| LOC_Os02g53500.2  | RFC5 - Putative clamp loader of PCNA, replication factor C subunit 5, expressed                  | Chr2  | 32722940 | 32727558 | - | 9  | 2251 | 5.44  |
| LOC_Os03g61220.1  | DEAD-box ATP-dependent RNA helicase 3, putative, expressed                                       | Chr3  | 34765939 | 34772346 | + | 10 | 3170 | 6.62  |
| LOC_Os03g61220.2  | DEAD-box ATP-dependent RNA helicase 3, putative, expressed                                       | Chr3  | 34765939 | 34772346 | + | 10 | 3167 | 6.62  |
| LOC_Os06g11910.1  | expressed protein                                                                                | Chr6  | 6344013  | 6347676  | - | 6  | 2543 | 4.55  |
| LOC_Os12g09000.1  | phosphomethylpyrimidine kinase/thiamin-phosphate pyrophosphorylase, putative, expressed          | Chr12 | 4706847  | 4711336  | + | 9  | 2354 | 4.43  |
| LOC_Os06g06280.1  | galactosyltransferase family protein, putative, expressed                                        | Chr6  | 2902268  | 2907304  | + | 7  | 1769 | 3.41  |
| LOC_Os09g32250.2  | DNA repair ATPase-related, putative, expressed                                                   | Chr9  | 19244915 | 19249815 | + | 14 | 2158 | 5.53  |
| LOC_Os12g09000.2  | phosphomethylpyrimidine kinase/thiamin-phosphate pyrophosphorylase, putative, expressed          | Chr12 | 4706847  | 4711336  | + | 9  | 2358 | 4.43  |
| LOC_Os04g33490.1  | neutral/alkaline invertase, putative, expressed                                                  | Chr4  | 20256137 | 20259317 | + | 6  | 2357 | 4.77  |
| LOC_Os01g17170.2  | magnesium-protoporphyrin IX monomethyl ester cyclase, chloroplast precursor, putative, expressed | Chr1  | 9874326  | 9876951  | + | 3  | 2431 | 4.28  |
| LOC_Os01g22660.1  | GDSL-like lipase/acylhydrolase, putative, expressed                                              | Chr1  | 12742056 | 12746046 | + | 5  | 2148 | 5.82  |
| LOC_Os10g35940.1  | folylpolyglutamate synthetase, putative, expressed                                               | Chr10 | 19201521 | 19206783 | - | 15 | 2612 | 6.05  |
| LOC_Os03g08640.1  | ORC2 - Putative origin recognition complex subunit 2, expressed                                  | Chr3  | 4446710  | 4449163  | - | 7  | 1670 | 4.25  |
| LOC_Os06g13860.2  | RCD1, putative, expressed                                                                        | Chr6  | 7698401  | 7703820  | + | 8  | 3024 | 5.07  |
| LOC_Os05g34550.3  | MLO domain containing protein, putative, expressed                                               | Chr5  | 20484912 | 20490183 | - | 10 | 3339 | 4.93  |
| LOC_Os03g02570.1  | dihydrodipicolinate reductase, putative, expressed                                               | Chr3  | 950273   | 952602   | - | 9  | 1185 | 4.53  |
| LOC_Os06g09090.3  | glutamate receptor 2.8 precursor, putative, expressed                                            | Chr6  | 4571088  | 4574927  | - | 5  | 2158 | 6.84  |
| LOC_Os02g24626.1  | uncharacterized protein ycf70, putative                                                          | Chr2  | 14282189 | 14282458 | + | 1  | 302  | 4.13  |
| LOC_Os01g61910.1  | KIP1, putative, expressed                                                                        | Chr1  | 35832966 | 35836375 | - | 2  | 3215 | 6.97  |
| LOC_Os11g25040.1  | plant-specific domain TIGR01615 family protein, expressed                                        | Chr11 | 14267737 | 14268968 | + | 1  | 1264 | 7.38  |
| LOC_Os05g01590.1  | heat shock protein DnaJ, putative, expressed                                                     | Chr5  | 351640   | 354043   | + | 6  | 1196 | 4.45  |
| LOC_Os09g23720.1  | expressed protein                                                                                | Chr9  | 14095779 | 14099966 | + | 9  | 1904 | 3.83  |

|                  |                                                                           |       |          |          |   |    |      |       |
|------------------|---------------------------------------------------------------------------|-------|----------|----------|---|----|------|-------|
| LOC_Os09g36760.1 | DUF630/DUF632 domains containing protein, putative, expressed             | Chr9  | 21208855 | 21213168 | + | 4  | 2469 | 4.20  |
| LOC_Os03g20460.2 | guanylate kinase, putative, expressed                                     | Chr3  | 11595454 | 11599057 | + | 3  | 1539 | 6.39  |
| LOC_Os03g48320.1 | disease resistance RPP13-like protein 1, putative, expressed              | Chr3  | 27517616 | 27521492 | - | 2  | 3604 | 6.02  |
| LOC_Os06g06280.2 | galactosyltransferase family protein, putative, expressed                 | Chr6  | 2902283  | 2907306  | + | 8  | 1725 | 3.41  |
| LOC_Os07g14540.1 | vesicle-associated membrane protein, putative, expressed                  | Chr7  | 8287836  | 8291216  | + | 5  | 1406 | 5.43  |
| LOC_Os03g08530.1 | aminotransferase, classes I and II, domain containing protein, expressed  | Chr3  | 4384011  | 4389386  | - | 14 | 2662 | 4.29  |
| LOC_Os11g02830.1 | protein kinase domain containing protein, expressed                       | Chr11 | 947548   | 952356   | - | 6  | 2116 | 4.82  |
| LOC_Os04g57310.1 | thiol-disulphide oxidoreductase DCC, putative, expressed                  | Chr4  | 34119501 | 34123601 | + | 8  | 1750 | 6.07  |
| LOC_Os11g02830.2 | protein kinase domain containing protein, expressed                       | Chr11 | 947548   | 952356   | - | 6  | 2111 | 4.82  |
| LOC_Os11g05180.3 | expressed protein                                                         | Chr11 | 2278748  | 2281615  | + | 4  | 1909 | 4.85  |
| LOC_Os04g10100.1 | retrotransposon protein, putative, Ty3-gypsy subclass, expressed          | Chr4  | 5450286  | 5457011  | - | 3  | 5511 | 3.94  |
| LOC_Os12g35380.1 | transposon protein, putative, CACTA, En/Spm sub-class, expressed          | Chr12 | 21512089 | 21515656 | + | 9  | 2355 | 4.17  |
| LOC_Os04g57310.2 | thiol-disulphide oxidoreductase DCC, putative, expressed                  | Chr4  | 34119501 | 34123601 | + | 8  | 1746 | 6.07  |
| LOC_Os02g14720.1 | expressed protein                                                         | Chr2  | 8114961  | 8121925  | + | 8  | 2618 | 4.83  |
| LOC_Os07g41180.1 | RNA-binding protein-like, putative, expressed                             | Chr7  | 24654813 | 24659848 | - | 10 | 2566 | 5.65  |
| LOC_Os01g16430.1 | cysteine proteinase inhibitor precursor protein, putative, expressed      | Chr1  | 9325545  | 9329334  | - | 4  | 1380 | 6.11  |
| LOC_Os01g43230.1 | expressed protein                                                         | Chr1  | 24695808 | 24697913 | - | 2  | 1616 | 4.77  |
| LOC_Os02g14720.2 | expressed protein                                                         | Chr2  | 8114961  | 8121925  | + | 8  | 2612 | 4.83  |
| LOC_Os02g55300.1 | CAF1 family ribonuclease containing protein, putative, expressed          | Chr2  | 33854163 | 33857048 | + | 1  | 2918 | 4.93  |
| LOC_Os07g31690.1 | retrotransposon protein, putative, unclassified, expressed                | Chr7  | 18814660 | 18818135 | + | 3  | 2582 | 3.80  |
| LOC_Os05g31520.1 | expressed protein                                                         | Chr5  | 18334338 | 18337704 | - | 6  | 852  | 3.60  |
| LOC_Os04g38640.1 | OsDegp5 - Putative Deg protease homologue, expressed                      | Chr4  | 22954845 | 22960460 | + | 13 | 2113 | 4.83  |
| LOC_Os07g10300.2 | expressed protein                                                         | Chr7  | 5521609  | 5526698  | + | 9  | 1831 | 5.42  |
| LOC_Os06g42540.2 | expressed protein                                                         | Chr6  | 25583151 | 25585089 | + | 3  | 1759 | 3.93  |
| LOC_Os01g56400.1 | ABC transporter, ATP-binding protein, putative, expressed                 | Chr1  | 32513693 | 32517028 | - | 5  | 1198 | 3.59  |
| LOC_Os01g58680.1 | apurinic endonuclease-redox protein, putative, expressed                  | Chr1  | 33919393 | 33924664 | + | 12 | 2396 | 5.72  |
| LOC_Os03g44710.3 | YABBY domain containing protein, putative, expressed                      | Chr3  | 25197057 | 25206961 | + | 4  | 1273 | 3.69  |
| LOC_Os01g40420.2 | CBS domain containing membrane protein, putative, expressed               | Chr1  | 22820220 | 22823182 | - | 4  | 2760 | 5.02  |
| LOC_Os05g07040.1 | PHD finger protein, putative, expressed                                   | Chr5  | 3697729  | 3702359  | - | 5  | 1454 | 4.70  |
| LOC_Os05g45830.1 | expressed protein                                                         | Chr5  | 26544658 | 26552137 | - | 11 | 3410 | 6.39  |
| LOC_Os04g39970.1 | vacuolar sorting protein 9 domain-containing protein, putative, expressed | Chr4  | 23790789 | 23792871 | - | 2  | 1193 | 5.32  |
| LOC_Os08g03430.1 | extracellular ligand-gated ion channel, putative, expressed               | Chr8  | 1606299  | 1609518  | + | 4  | 2065 | 3.99  |
| LOC_Os01g50930.1 | expressed protein                                                         | Chr1  | 29240064 | 29246843 | + | 4  | 1293 | 4.79  |
| LOC_Os11g19460.1 | haloacid dehalogenase-like hydrolase family protein, putative, expressed  | Chr11 | 11202372 | 11207388 | + | 7  | 1886 | 5.67  |
| LOC_Os07g30220.1 | expressed protein                                                         | Chr7  | 17851168 | 17854470 | - | 5  | 1372 | 4.37  |
| LOC_Os12g08200.1 | expressed protein                                                         | Chr12 | 4188947  | 4190011  | + | 1  | 1097 | 3.98  |
| LOC_Os03g08640.2 | ORC2 - Putative origin recognition complex subunit 2, expressed           | Chr3  | 4446710  | 4449163  | - | 6  | 1713 | 4.25  |
| LOC_Os09g24954.1 | double-stranded RNA binding motif containing protein, expressed           | Chr9  | 14896147 | 14901415 | + | 4  | 1304 | 5.70  |
| LOC_Os11g08330.1 | POLD1 - Putative DNA polymerase delta catalytic subunit, expressed        | Chr11 | 4387460  | 4397808  | - | 30 | 4700 | 5.28  |
| LOC_Os02g31074.1 | expressed protein                                                         | Chr2  | 18569765 | 18573161 | - | 2  | 2901 | 5.90  |
| LOC_Os10g36270.1 | disease resistance RPP13-like protein 1, putative, expressed              | Chr10 | 19389025 | 19396741 | + | 3  | 4663 | 4.92  |
| LOC_Os11g06440.1 | expressed protein                                                         | Chr11 | 3110576  | 3112430  | + | 1  | 1887 | 4.96  |
| LOC_Os03g47610.1 | thiamine biosynthesis protein thiC, putative, expressed                   | Chr3  | 26952048 | 26957733 | + | 6  | 2425 | 7.46  |
| LOC_Os11g44430.1 | protein kinase, putative, expressed                                       | Chr11 | 26877874 | 26880047 | - | 2  | 1887 | -8.71 |
| LOC_Os04g58630.3 | DNA mismatch repair protein MSH3, putative, expressed                     | Chr4  | 34873439 | 34877172 | - | 6  | 2367 | 4.21  |

|                  |                                                                           |       |          |            |    |      |       |
|------------------|---------------------------------------------------------------------------|-------|----------|------------|----|------|-------|
| LOC_Os02g35890.1 | expressed protein                                                         | Chr2  | 21561848 | 21563276 - | 3  | 858  | 4.82  |
| LOC_Os03g16874.2 | expressed protein                                                         | Chr3  | 9375951  | 9377728 +  | 4  | 931  | 3.96  |
| LOC_Os03g13450.1 | expressed protein                                                         | Chr3  | 7274601  | 7277976 +  | 2  | 1623 | 3.92  |
| LOC_Os05g17000.1 | retrotransposon protein, putative, Ty3-gypsy subclass, expressed          | Chr5  | 9697538  | 9704261 +  | 4  | 5072 | 4.01  |
| LOC_Os08g29854.1 | RGH1A, putative, expressed                                                | Chr8  | 18345865 | 18359037 + | 5  | 3693 | 5.39  |
| LOC_Os02g15230.1 | GDSL-like lipase/acylhydrolase, putative, expressed                       | Chr2  | 8501442  | 8504977 +  | 5  | 2023 | -5.48 |
| LOC_Os07g27430.1 | expressed protein                                                         | Chr7  | 15982511 | 15984088 + | 2  | 724  | 3.34  |
| LOC_Os06g09090.4 | glutamate receptor 2.8 precursor, putative, expressed                     | Chr6  | 4571088  | 4574911 -  | 6  | 2278 | 6.85  |
| LOC_Os01g31020.1 | retrotransposon protein, putative, unclassified, expressed                | Chr1  | 16961290 | 16973754 + | 15 | 3880 | -7.43 |
| LOC_Os02g58030.1 | leucine-rich repeat-containing protein 40, putative, expressed            | Chr2  | 35526587 | 35533091 - | 21 | 2983 | 5.76  |
| LOC_Os03g09090.1 | expressed protein                                                         | Chr3  | 4720645  | 4724099 -  | 8  | 2088 | 6.51  |
| LOC_Os04g28820.1 | retrotransposon protein, putative, unclassified, expressed                | Chr4  | 17063617 | 17070532 - | 7  | 6473 | 7.28  |
| LOC_Os05g44330.4 | DJ-1 family protein, putative, expressed                                  | Chr5  | 25796297 | 25800798 + | 5  | 1416 | 5.19  |
| LOC_Os01g67870.1 | expressed protein                                                         | Chr1  | 39437967 | 39442873 - | 14 | 2412 | 4.55  |
| LOC_Os06g09090.2 | glutamate receptor 2.8 precursor, putative, expressed                     | Chr6  | 4571088  | 4574911 -  | 6  | 2243 | 6.84  |
| LOC_Os11g10070.1 | transcriptional corepressor SEUSS, putative, expressed                    | Chr11 | 5420328  | 5427177 +  | 11 | 3148 | -3.45 |
| LOC_Os08g16600.1 | WD-40 repeat protein family, putative, expressed                          | Chr8  | 10152071 | 10156811 + | 5  | 1792 | 5.91  |
| LOC_Os04g57870.1 | expressed protein                                                         | Chr4  | 34457067 | 34463775 - | 7  | 4346 | 4.53  |
| LOC_Os07g33610.1 | cytochrome P450, putative, expressed                                      | Chr7  | 20077861 | 20081621 + | 6  | 2233 | -5.95 |
| LOC_Os03g08430.1 | SAC domain containing protein, putative, expressed                        | Chr3  | 4327386  | 4336225 +  | 16 | 4640 | -2.51 |
| LOC_Os03g08430.2 | SAC domain containing protein, putative, expressed                        | Chr3  | 4327386  | 4336225 +  | 16 | 4637 | -2.51 |
| LOC_Os07g23110.1 | poly synthetase 1, putative, expressed                                    | Chr7  | 13026440 | 13037161 + | 20 | 3976 | 6.25  |
| LOC_Os05g08854.1 | expressed protein                                                         | Chr5  | 4886631  | 4890243 -  | 5  | 1912 | 3.94  |
| LOC_Os01g39600.2 | expressed protein                                                         | Chr1  | 22337346 | 22341545 - | 3  | 3620 | 4.75  |
| LOC_Os08g24000.1 | retrotransposon protein, putative, unclassified, expressed                | Chr8  | 14519023 | 14520861 + | 4  | 995  | 5.10  |
| LOC_Os05g44380.1 | MPPN domain containing protein, expressed                                 | Chr5  | 25820352 | 25822805 - | 3  | 1789 | 6.00  |
| LOC_Os02g55010.1 | expressed protein                                                         | Chr2  | 33700414 | 33706335 + | 7  | 3996 | 4.06  |
| LOC_Os08g37140.1 | phosphoglycerate mutase, putative, expressed                              | Chr8  | 23468743 | 23472607 - | 6  | 1416 | 4.81  |
| LOC_Os10g32410.1 | retrotransposon protein, putative, unclassified, expressed                | Chr10 | 16993927 | 16994995 + | 3  | 789  | 3.33  |
| LOC_Os05g10590.1 | expressed protein                                                         | Chr5  | 5763848  | 5767415 +  | 3  | 2148 | 5.49  |
| LOC_Os03g44710.1 | YABBY domain containing protein, putative, expressed                      | Chr3  | 25197057 | 25206961 + | 6  | 1462 | 3.79  |
| LOC_Os07g28460.1 | transposon protein, putative, unclassified, expressed                     | Chr7  | 16650377 | 16657246 + | 7  | 1627 | 7.06  |
| LOC_Os02g38350.3 | Regulator of chromosome condensation domain containing protein, expressed | Chr2  | 23183102 | 23186461 - | 6  | 2430 | 5.30  |
| LOC_Os01g63220.2 | kinase, pfkB family, putative, expressed                                  | Chr1  | 36640943 | 36647156 + | 4  | 2486 | 4.54  |
| LOC_Os06g05600.1 | OsFBDUF31 - F-box and DUF domain containing protein, expressed            | Chr6  | 2535324  | 2537022 +  | 1  | 1731 | 4.41  |
| LOC_Os05g09716.1 | transposon protein, putative, CACTA, En/Spm sub-class, expressed          | Chr5  | 5491367  | 5495289 +  | 8  | 2146 | 3.41  |
| LOC_Os03g54091.1 | OsTOP6A1 - Topoisomerase 6 subunit A homolog 1, expressed                 | Chr3  | 31009978 | 31013940 + | 15 | 1879 | 5.86  |
| LOC_Os03g61850.1 | transposon protein, putative, unclassified, expressed                     | Chr3  | 35065657 | 35068512 - | 5  | 2680 | 6.54  |
| LOC_Os05g01060.2 | expressed protein                                                         | Chr5  | 75185    | 83483 -    | 16 | 2911 | 4.95  |
| LOC_Os12g24240.1 | expressed protein                                                         | Chr12 | 13812070 | 13815456 + | 4  | 687  | 4.88  |
| LOC_Os06g23220.1 | GRF zinc finger family protein, expressed                                 | Chr6  | 13557094 | 13559144 - | 4  | 983  | 3.42  |
| LOC_Os07g37010.2 | cyclin, putative, expressed                                               | Chr7  | 22169511 | 22171723 - | 6  | 1634 | 3.83  |
| LOC_Os04g02140.1 | transposon protein, putative, CACTA, En/Spm sub-class, expressed          | Chr4  | 706797   | 711491 -   | 14 | 2406 | 5.47  |
| LOC_Os05g32140.1 | NAD dependent epimerase/dehydratase family protein, putative, expressed   | Chr5  | 18738597 | 18741960 + | 3  | 2386 | 4.61  |
| LOC_Os11g41540.4 | disease resistance RPP8-like protein 3, putative, expressed               | Chr11 | 24911501 | 24917044 + | 5  | 3352 | 5.80  |

|                  |                                                                                      |       |          |          |   |    |      |       |
|------------------|--------------------------------------------------------------------------------------|-------|----------|----------|---|----|------|-------|
| LOC_Os04g43420.1 | PTAC5, putative, expressed                                                           | Chr4  | 25700861 | 25703587 | + | 6  | 2086 | 5.37  |
| LOC_Os03g10334.1 | expressed protein                                                                    | Chr3  | 5271246  | 5272333  | + | 3  | 920  | 5.65  |
| LOC_Os05g01060.1 | expressed protein                                                                    | Chr5  | 75185    | 83483    | - | 21 | 3446 | 5.33  |
| LOC_Os01g01610.1 | IscA-like iron-sulfur assembly protein, mitochondrial precursor, putative, expressed | Chr1  | 306869   | 308842   | - | 4  | 965  | 3.85  |
| LOC_Os10g03690.1 | OsFBX346 - F-box domain containing protein, expressed                                | Chr10 | 1656604  | 1659692  | - | 4  | 2002 | 5.86  |
| LOC_Os07g10120.1 | expressed protein                                                                    | Chr7  | 5431553  | 5436179  | + | 10 | 1966 | 6.31  |
| LOC_Os01g04990.2 | mitochondrial carrier protein, putative, expressed                                   | Chr1  | 2349919  | 2353502  | - | 7  | 1686 | 5.83  |
| LOC_Os04g01490.2 | zinc finger, C3HC4 type, domain containing protein, expressed                        | Chr4  | 333687   | 337087   | + | 8  | 2224 | -4.93 |
| LOC_Os10g39810.1 | fatty acid hydroxylase, putative, expressed                                          | Chr10 | 21308453 | 21311416 | + | 5  | 1478 | 4.36  |
| LOC_Os06g49450.3 | expressed protein                                                                    | Chr6  | 29961036 | 29967489 | + | 10 | 2487 | 4.27  |
| LOC_Os03g51470.1 | expressed protein                                                                    | Chr3  | 29451096 | 29453625 | - | 2  | 948  | 5.75  |
| LOC_Os12g40150.1 | expressed protein                                                                    | Chr12 | 24826746 | 24828462 | - | 4  | 647  | 3.16  |
| LOC_Os01g37210.1 | expressed protein                                                                    | Chr1  | 20783355 | 20785479 | - | 2  | 1742 | 4.75  |
| LOC_Os04g01490.1 | zinc finger, C3HC4 type, domain containing protein, expressed                        | Chr4  | 333972   | 337060   | + | 8  | 2248 | -4.93 |
| LOC_Os03g47540.1 | expressed protein                                                                    | Chr3  | 26882047 | 26885258 | + | 4  | 1190 | 3.81  |
| LOC_Os04g43430.1 | pentatricopeptide, putative, expressed                                               | Chr4  | 25702074 | 25707506 | - | 4  | 4650 | 5.27  |
| LOC_Os11g18990.1 | histidine triad family protein, putative, expressed                                  | Chr11 | 10825631 | 10831933 | + | 7  | 1461 | 5.42  |
| LOC_Os01g16090.1 | RNA binding protein, putative, expressed                                             | Chr1  | 9063968  | 9066787  | - | 2  | 1959 | 5.82  |
| LOC_Os01g08510.1 | MAR-binding filament-like protein 1, putative, expressed                             | Chr1  | 4208553  | 4213302  | - | 3  | 2813 | 5.08  |
| LOC_Os08g30980.1 | expressed protein                                                                    | Chr8  | 19124432 | 19127727 | + | 5  | 913  | 3.89  |
| LOC_Os11g41540.3 | disease resistance RPP8-like protein 3, putative, expressed                          | Chr11 | 24911501 | 24917044 | + | 5  | 3379 | 5.81  |
| LOC_Os03g62490.1 | prohibitin-2, putative, expressed                                                    | Chr3  | 35382689 | 35385192 | - | 5  | 1634 | 4.61  |
| LOC_Os01g39840.2 | expressed protein                                                                    | Chr1  | 22471886 | 22474413 | - | 2  | 2352 | 4.79  |
| LOC_Os02g01710.3 | peptidase family C78 domain containing protein, expressed                            | Chr2  | 391819   | 395803   | + | 8  | 2406 | 4.60  |
| LOC_Os01g22600.1 | mitochondrial carrier protein, putative, expressed                                   | Chr1  | 12704700 | 12709808 | - | 6  | 2028 | 5.41  |
| LOC_Os02g01710.2 | peptidase family C78 domain containing protein, expressed                            | Chr2  | 391819   | 395803   | + | 8  | 2410 | 4.60  |
| LOC_Os02g19170.1 | expressed protein                                                                    | Chr2  | 11180083 | 11182664 | + | 2  | 2573 | 5.76  |
| LOC_Os03g51890.1 | expressed protein                                                                    | Chr3  | 29749327 | 29755851 | - | 9  | 1365 | 6.56  |
| LOC_Os09g33580.1 | BEE 1, putative, expressed                                                           | Chr9  | 19812678 | 19815196 | - | 8  | 1657 | 6.33  |
| LOC_Os12g36110.1 | calmodulin binding protein, putative, expressed                                      | Chr12 | 22132798 | 22136895 | - | 11 | 3214 | -7.68 |
| LOC_Os03g45170.1 | amino acid permease, putative, expressed                                             | Chr3  | 25504234 | 25509983 | - | 14 | 2920 | 5.04  |
| LOC_Os01g73940.1 | expressed protein                                                                    | Chr1  | 42838969 | 42839550 | + | 1  | 614  | -5.30 |
| LOC_Os02g03620.1 | seven in absentia protein family domain containing protein, expressed                | Chr2  | 1481233  | 1485113  | - | 4  | 1544 | 4.18  |
| LOC_Os03g58260.1 | indole-3-glycerol phosphate lyase, chloroplast precursor, putative, expressed        | Chr3  | 33194496 | 33198099 | - | 8  | 1607 | 5.51  |
| LOC_Os02g06588.1 | ATP binding protein, putative, expressed                                             | Chr2  | 3311245  | 3313330  | + | 5  | 1833 | 5.24  |
| LOC_Os03g37954.1 | expressed protein                                                                    | Chr3  | 21081361 | 21081962 | + | 1  | 634  | 3.27  |
| LOC_Os02g58670.1 | bZIP transcription factor domain containing protein, expressed                       | Chr2  | 35853347 | 35854731 | - | 3  | 1163 | 5.27  |
| LOC_Os02g07670.3 | URED, putative, expressed                                                            | Chr2  | 3992040  | 3995076  | - | 4  | 2876 | 4.30  |
| LOC_Os06g10280.1 | CDP-alcohol phosphatidyltransferase, putative, expressed                             | Chr6  | 5276590  | 5285926  | - | 18 | 2344 | 6.85  |
| LOC_Os03g20100.1 | S1 RNA binding domain containing protein, expressed                                  | Chr3  | 11351431 | 11355773 | - | 7  | 1813 | 5.04  |
| LOC_Os03g45970.2 | expressed protein                                                                    | Chr3  | 25980114 | 25990239 | - | 9  | 2478 | 4.17  |
| LOC_Os11g19460.2 | haloacid dehalogenase-like hydrolase family protein, putative, expressed             | Chr11 | 11202372 | 11207388 | + | 6  | 1940 | 5.68  |
| LOC_Os05g18790.1 | formyl transferase, putative, expressed                                              | Chr5  | 10914251 | 10916007 | + | 5  | 865  | 4.17  |
| LOC_Os02g29370.1 | transposon protein, putative, Mariner sub-class, expressed                           | Chr2  | 17443434 | 17445593 | - | 5  | 1321 | 4.51  |
| LOC_Os02g37850.1 | expressed protein                                                                    | Chr2  | 22865820 | 22870108 | + | 4  | 1626 | 5.41  |

|                  |                                                                             |       |          |            |    |      |       |
|------------------|-----------------------------------------------------------------------------|-------|----------|------------|----|------|-------|
| LOC_Os06g51530.1 | ribosomal protein L29, putative, expressed                                  | Chr6  | 31223501 | 31226586 - | 8  | 1128 | 4.86  |
| LOC_Os03g34280.2 | expressed protein                                                           | Chr3  | 19511670 | 19513644 + | 2  | 1092 | 5.01  |
| LOC_Os01g56620.1 | pseudouridylate synthase, putative, expressed                               | Chr1  | 32660700 | 32667425 - | 19 | 3262 | 5.71  |
| LOC_Os08g39600.1 | RNA methyltransferase, TrmH family protein, putative, expressed             | Chr8  | 25064640 | 25066853 - | 6  | 1035 | 4.58  |
| LOC_Os12g14110.1 | expressed protein                                                           | Chr12 | 8000497  | 8004499 -  | 5  | 1164 | 4.77  |
| LOC_Os03g52630.2 | endoglucanase, putative, expressed                                          | Chr3  | 30181636 | 30184143 - | 5  | 2117 | -3.38 |
| LOC_Os01g04990.1 | mitochondrial carrier protein, putative, expressed                          | Chr1  | 2349919  | 2353502 -  | 7  | 1723 | 5.83  |
| LOC_Os11g30484.1 | ZOS11-03 - C2H2 zinc finger protein, expressed                              | Chr11 | 17722080 | 17725442 + | 4  | 1476 | 7.00  |
| LOC_Os03g21490.1 | ABC transporter, ATP-binding protein, putative, expressed                   | Chr3  | 12276223 | 12280170 - | 7  | 1651 | 5.27  |
| LOC_Os05g09000.3 | expressed protein                                                           | Chr5  | 4983598  | 4986913 -  | 3  | 1485 | 3.66  |
| LOC_Os01g66600.2 | rhodanese-like, putative, expressed                                         | Chr1  | 38685221 | 38688097 - | 3  | 1373 | 5.23  |
| LOC_Os07g31550.1 | powdery mildew resistant protein 5, putative, expressed                     | Chr7  | 18727988 | 18733568 + | 6  | 1842 | 4.11  |
| LOC_Os01g65460.2 | beta-galactosidase precursor, putative, expressed                           | Chr1  | 37994513 | 38001584 + | 19 | 4395 | 6.31  |
| LOC_Os01g67120.2 | rhodanese-like domain containing protein, putative, expressed               | Chr1  | 38961987 | 38966131 - | 12 | 2209 | 6.09  |
| LOC_Os10g26140.1 | CPuORF15 - conserved peptide uORF-containing transcript, expressed          | Chr10 | 13543408 | 13552223 + | 15 | 3672 | 3.15  |
| LOC_Os08g36980.1 | AGAP010609-PA, putative, expressed                                          | Chr8  | 23386887 | 23388722 + | 1  | 1868 | 5.14  |
| LOC_Os02g19170.2 | expressed protein                                                           | Chr2  | 11180089 | 11182664 + | 1  | 2608 | 5.76  |
| LOC_Os08g42940.1 | expressed protein                                                           | Chr8  | 27136081 | 27136287 + | 1  | 239  | 2.81  |
| LOC_Os08g19374.4 | expressed protein                                                           | Chr8  | 11587793 | 11589725 + | 2  | 1194 | 4.03  |
| LOC_Os03g49420.4 | HEAT repeat family protein, putative, expressed                             | Chr3  | 28133081 | 28137136 + | 9  | 1875 | 4.03  |
| LOC_Os03g30088.1 | retrotransposon protein, putative, unclassified                             | Chr3  | 17161963 | 17165174 - | 3  | 678  | 3.16  |
| LOC_Os01g70130.2 | protein kinase domain containing protein, expressed                         | Chr1  | 40586762 | 40591302 - | 4  | 1401 | 3.87  |
| LOC_Os11g09160.2 | B3 DNA binding domain containing protein, expressed                         | Chr11 | 4894638  | 4901214 -  | 5  | 1671 | 4.38  |
| LOC_Os08g04760.1 | retrotransposon protein, putative, unclassified, expressed                  | Chr8  | 2371996  | 2374432 -  | 2  | 1030 | 3.52  |
| LOC_Os04g45280.1 | histidine triad family protein, putative, expressed                         | Chr4  | 26754330 | 26757287 - | 6  | 1252 | 5.30  |
| LOC_Os03g62080.1 | mRNA-decapping enzyme, putative, expressed                                  | Chr3  | 35168119 | 35174079 - | 7  | 2578 | 5.67  |
| LOC_Os09g30280.1 | glycosyl transferase 8 domain containing protein, putative, expressed       | Chr9  | 18441076 | 18445160 + | 7  | 2794 | 5.19  |
| LOC_Os02g05730.1 | protein kinase domain containing protein, expressed                         | Chr2  | 2816880  | 2824133 -  | 12 | 3329 | 5.25  |
| LOC_Os02g14520.1 | transposon protein, putative, CACTA, En/Spm sub-class, expressed            | Chr2  | 7998422  | 8001879 -  | 5  | 3100 | 4.27  |
| LOC_Os05g40000.1 | expressed protein                                                           | Chr5  | 23502667 | 23504193 - | 2  | 1500 | 2.90  |
| LOC_Os05g12140.2 | Leucine Rich Repeat family protein, expressed                               | Chr5  | 6936859  | 6939771 -  | 5  | 2585 | 5.23  |
| LOC_Os01g54040.1 | ATP-dependent protease La, putative, expressed                              | Chr1  | 31078609 | 31088007 - | 11 | 2629 | 4.43  |
| LOC_Os09g34110.2 | expressed protein                                                           | Chr9  | 20128154 | 20134451 - | 4  | 4791 | 3.91  |
| LOC_Os12g08830.1 | thylakoid lumenal 29.8 kDa protein, putative, expressed                     | Chr12 | 4555855  | 4558043 -  | 5  | 1509 | 3.66  |
| LOC_Os01g04110.1 | mediator of RNA polymerase II transcription subunit 22, putative, expressed | Chr1  | 1787870  | 1791498 -  | 4  | 953  | 5.40  |
| LOC_Os03g06070.2 | la domain containing protein, putative, expressed                           | Chr3  | 3039736  | 3041597 +  | 5  | 1671 | 4.33  |
| LOC_Os09g37270.1 | ATROPGEF7/ROPGEF7, putative, expressed                                      | Chr9  | 21525950 | 21529866 - | 5  | 2558 | 4.61  |
| LOC_Os01g48820.1 | expressed protein                                                           | Chr1  | 28012393 | 28014006 + | 1  | 1646 | 3.19  |
| LOC_Os02g08440.4 | WRKY71, expressed                                                           | Chr2  | 4542929  | 4544983 +  | 4  | 1441 | -4.62 |
| LOC_Os12g08830.2 | thylakoid lumenal 29.8 kDa protein, putative, expressed                     | Chr12 | 4555855  | 4558043 -  | 5  | 1513 | 3.66  |
| LOC_Os12g27070.1 | heat shock protein DnaJ, putative, expressed                                | Chr12 | 15848618 | 15851558 - | 6  | 1501 | 5.23  |
| LOC_Os04g50110.1 | RNA recognition motif containing protein, putative, expressed               | Chr4  | 29888072 | 29891194 - | 5  | 1548 | 5.59  |
| LOC_Os09g37270.2 | ATROPGEF7/ROPGEF7, putative, expressed                                      | Chr9  | 21525976 | 21529866 - | 4  | 2608 | 4.61  |
| LOC_Os01g29180.2 | expressed protein                                                           | Chr1  | 16346972 | 16349469 - | 4  | 1484 | 3.52  |
| LOC_Os06g11910.2 | expressed protein                                                           | Chr6  | 6344013  | 6347676 -  | 6  | 2755 | 4.55  |

|                  |                                                                                            |       |          |            |    |      |       |
|------------------|--------------------------------------------------------------------------------------------|-------|----------|------------|----|------|-------|
| LOC_Os01g65460.1 | beta-galactosidase precursor, putative, expressed                                          | Chr1  | 37994513 | 38001584 + | 20 | 4304 | 6.27  |
| LOC_Os12g39820.1 | retrotransposon protein, putative, Ty3-gypsy subclass, expressed                           | Chr12 | 24608947 | 24609372 - | 1  | 458  | 3.02  |
| LOC_Os03g59580.1 | hydrolase, NUDIX family, domain containing protein, expressed                              | Chr3  | 33916812 | 33921098 - | 4  | 1198 | 4.63  |
| LOC_Os02g51820.1 | expressed protein                                                                          | Chr2  | 31747712 | 31749762 + | 2  | 1856 | 6.38  |
| LOC_Os02g41460.1 | DUF640 domain containing protein, putative, expressed                                      | Chr2  | 24830541 | 24832108 - | 3  | 1308 | 3.64  |
| LOC_Os01g11570.1 | GDSL-like lipase/acylhydrolase, putative, expressed                                        | Chr1  | 6242495  | 6244969 -  | 5  | 1287 | 3.36  |
| LOC_Os10g39520.1 | MLO domain containing protein, putative, expressed                                         | Chr10 | 21109457 | 21114148 - | 15 | 2555 | 3.20  |
| LOC_Os01g13490.1 | expressed protein                                                                          | Chr1  | 7519617  | 7524433 +  | 2  | 1280 | 3.68  |
| LOC_Os05g12140.1 | Leucine Rich Repeat family protein, expressed                                              | Chr5  | 6936859  | 6939771 -  | 6  | 2522 | 5.23  |
| LOC_Os08g22004.1 | retrotransposon protein, putative, unclassified, expressed                                 | Chr8  | 13185325 | 13195235 - | 4  | 5279 | -6.05 |
| LOC_Os10g03669.2 | expressed protein                                                                          | Chr10 | 1642417  | 1644857 -  | 5  | 2070 | 4.05  |
| LOC_Os05g08440.1 | OsFBX163 - F-box domain containing protein, expressed                                      | Chr5  | 4610870  | 4612756 +  | 2  | 1863 | 5.36  |
| LOC_Os07g30830.1 | SNF7 family protein, putative, expressed                                                   | Chr7  | 18250957 | 18253283 + | 3  | 756  | 4.12  |
| LOC_Os12g05210.1 | expressed protein                                                                          | Chr12 | 2312450  | 2313272 +  | 1  | 855  | 3.41  |
| LOC_Os12g37610.1 | ribosomal protein S6, putative, expressed                                                  | Chr12 | 23096994 | 23099367 - | 5  | 1260 | 4.58  |
| LOC_Os02g41954.1 | gibberellin 2-beta-dioxygenase 7, putative, expressed                                      | Chr2  | 25199386 | 25203742 - | 3  | 1653 | 4.81  |
| LOC_Os07g12540.1 | expressed protein                                                                          | Chr7  | 7160923  | 7162244 -  | 3  | 648  | 3.35  |
| LOC_Os07g09950.1 | OsFBX222 - F-box domain containing protein, expressed                                      | Chr7  | 5303491  | 5304753 -  | 1  | 1295 | 4.13  |
| LOC_Os09g34110.1 | expressed protein                                                                          | Chr9  | 20128201 | 20134358 - | 5  | 3233 | 3.69  |
| LOC_Os06g03790.1 | 39S ribosomal protein L47, mitochondrial precursor, putative, expressed                    | Chr6  | 1512795  | 1516434 +  | 3  | 1032 | 3.38  |
| LOC_Os01g14920.1 | zinc knuckle family protein, putative, expressed                                           | Chr1  | 8359014  | 8362270 -  | 3  | 1321 | 3.99  |
| LOC_Os03g02900.1 | B3 DNA binding domain containing protein, expressed                                        | Chr3  | 1152918  | 1154876 +  | 1  | 1991 | 5.16  |
| LOC_Os03g39380.1 | expressed protein                                                                          | Chr3  | 21881948 | 21885333 + | 5  | 1001 | 3.51  |
| LOC_Os08g12360.1 | retrotransposon protein, putative, Ty3-gypsy subclass, expressed                           | Chr8  | 7281253  | 7283483 -  | 5  | 1336 | 3.59  |
| LOC_Os05g11750.1 | protein kinase, putative, expressed                                                        | Chr5  | 6666498  | 6671971 -  | 6  | 1867 | 5.58  |
| LOC_Os01g29830.2 | expressed protein                                                                          | Chr1  | 16716655 | 16719424 + | 6  | 1560 | 4.74  |
| LOC_Os09g09820.1 | retrotransposon protein, putative, unclassified, expressed                                 | Chr9  | 5320875  | 5323838 +  | 1  | 2996 | 3.03  |
| LOC_Os01g67590.1 | oligopeptidase, putative, expressed                                                        | Chr1  | 39289297 | 39296646 + | 20 | 3234 | 5.20  |
| LOC_Os08g02040.1 | expressed protein                                                                          | Chr8  | 658503   | 661608 -   | 3  | 2878 | 4.31  |
| LOC_Os03g39380.2 | expressed protein                                                                          | Chr3  | 21881948 | 21885333 + | 4  | 1101 | 3.51  |
| LOC_Os03g13450.2 | expressed protein                                                                          | Chr3  | 7274601  | 7277976 +  | 3  | 1714 | 3.96  |
| LOC_Os07g33850.2 | ras-related protein, putative, expressed                                                   | Chr7  | 20249139 | 20253102 + | 6  | 2183 | 5.26  |
| LOC_Os12g03500.1 | expressed protein                                                                          | Chr12 | 1387652  | 1391278 -  | 4  | 979  | 4.24  |
| LOC_Os08g14160.1 | retrotransposon protein, putative, unclassified                                            | Chr8  | 8455801  | 8456055 -  | 1  | 287  | 2.84  |
| LOC_Os01g41510.1 | calcineurin B, putative, expressed                                                         | Chr1  | 23498443 | 23502377 + | 9  | 1418 | 4.69  |
| LOC_Os04g50208.1 | phosphoenolpyruvate carboxykinase, putative, expressed                                     | Chr4  | 29969234 | 29972696 - | 10 | 1951 | 6.76  |
| LOC_Os08g17000.1 | expressed protein                                                                          | Chr8  | 10410093 | 10411904 + | 3  | 1049 | 3.53  |
| LOC_Os01g58690.3 | endonuclease/exonuclease/phosphatase family domain containing protein, expressed           | Chr1  | 33926531 | 33929814 + | 8  | 1620 | 4.72  |
| LOC_Os10g35940.2 | folylpolyglutamate synthetase, putative, expressed                                         | Chr10 | 19201521 | 19206783 - | 14 | 2910 | 6.16  |
| LOC_Os05g35060.1 | DUF803 domain containing, putative, expressed                                              | Chr5  | 20807057 | 20811318 - | 9  | 2425 | 5.06  |
| LOC_Os03g64050.1 | receptor protein kinase, putative, expressed                                               | Chr3  | 36189259 | 36190656 + | 1  | 1430 | 3.69  |
| LOC_Os02g36470.1 | retrotransposon protein, putative, unclassified, expressed                                 | Chr2  | 22026079 | 22031697 + | 3  | 5367 | 3.75  |
| LOC_Os12g02540.1 | BTBN23 - Bric-a-Brac, Tramtrack, Broad Complex BTB domain with non-phototropic hypocotyl 3 | Chr12 | 864792   | 869553 -   | 4  | 2757 | 3.69  |
| LOC_Os01g29830.1 | expressed protein                                                                          | Chr1  | 16716655 | 16719424 + | 6  | 1578 | 4.74  |
| LOC_Os02g31960.3 | ATP/GTP binding protein, putative, expressed                                               | Chr2  | 18889920 | 18892036 - | 5  | 1899 | 6.50  |

|                  |                                                                                            |       |          |            |    |      |       |
|------------------|--------------------------------------------------------------------------------------------|-------|----------|------------|----|------|-------|
| LOC_Os01g62900.1 | amino acid kinase, putative, expressed                                                     | Chr1  | 36430978 | 36440843 + | 21 | 4113 | 6.33  |
| LOC_Os04g24220.2 | OsWAK32 - OsWAK receptor-like protein kinase, expressed                                    | Chr4  | 13863244 | 13868079 + | 6  | 3162 | 4.93  |
| LOC_Os03g41460.1 | CAMK_CAMK_like.20 - CAMK includes calcium/calmodulin deperdent protein kinases, expressed  | Chr3  | 23068745 | 23071303 - | 7  | 1966 | 6.36  |
| LOC_Os08g28570.1 | resistance protein, putative, expressed                                                    | Chr8  | 17451968 | 17456043 + | 4  | 2780 | -7.10 |
| LOC_Os07g43160.1 | uncharacterized glycosyl hydrolase Rv2006/MT2062, putative, expressed                      | Chr7  | 25867212 | 25871233 + | 11 | 1870 | 4.62  |
| LOC_Os06g06210.2 | expressed protein                                                                          | Chr6  | 2874350  | 2877067 +  | 2  | 2306 | 5.42  |
| LOC_Os12g39380.1 | BTBN24 - Bric-a-Brac, Tramtrack, Broad Complex BTB domain with non-phototropic hypocotyl 3 | Chr12 | 24218359 | 24224963 - | 5  | 3233 | 4.37  |
| LOC_Os11g19460.3 | haloacid dehalogenase-like hydrolase family protein, putative, expressed                   | Chr11 | 11202372 | 11207388 + | 5  | 2642 | 4.83  |
| LOC_Os04g48260.1 | zinc RING finger protein, putative, expressed                                              | Chr4  | 28744397 | 28747883 + | 7  | 1528 | 5.74  |
| LOC_Os03g52320.1 | GRF-interacting factor 1, putative, expressed                                              | Chr3  | 30045079 | 30048795 - | 4  | 1484 | 3.87  |
| LOC_Os01g62160.1 | trp repressor/replication initiator, putative, expressed                                   | Chr1  | 35983819 | 35987592 - | 2  | 1915 | 6.49  |
| LOC_Os06g06820.1 | hydrolase, alpha/beta fold family domain containing protein, expressed                     | Chr6  | 3219079  | 3222414 -  | 9  | 1781 | 4.80  |
| LOC_Os07g24820.1 | thionin-like peptide, putative, expressed                                                  | Chr7  | 14106655 | 14107221 + | 2  | 388  | -6.58 |
| LOC_Os08g35930.2 | OsFBL50 - F-box domain and LRR containing protein, expressed                               | Chr8  | 22656289 | 22659552 - | 4  | 2749 | 4.36  |
| LOC_Os03g05300.1 | cyclin-dependent kinases regulatory subunit 1, putative, expressed                         | Chr3  | 2572063  | 2572534 +  | 3  | 369  | 3.58  |
| LOC_Os06g14420.1 | hydrolase, NUDIX family, domain containing protein, expressed                              | Chr6  | 8068591  | 8070044 -  | 1  | 1486 | 3.87  |
| LOC_Os03g45970.3 | expressed protein                                                                          | Chr3  | 25979871 | 25990239 - | 9  | 2646 | 4.17  |
| LOC_Os06g39680.1 | transposon protein, putative, unclassified, expressed                                      | Chr6  | 23556493 | 23559285 + | 2  | 2755 | 5.45  |
| LOC_Os01g58690.2 | endonuclease/exonuclease/phosphatase family domain containing protein, expressed           | Chr1  | 33926609 | 33929814 + | 8  | 1643 | 4.72  |
| LOC_Os08g33430.1 | formin, putative, expressed                                                                | Chr8  | 20855162 | 20858214 + | 4  | 2934 | 4.88  |
| LOC_Os10g27080.1 | expressed protein                                                                          | Chr10 | 14271508 | 14272625 + | 3  | 849  | 3.48  |
| LOC_Os08g35930.1 | OsFBL50 - F-box domain and LRR containing protein, expressed                               | Chr8  | 22656289 | 22659552 - | 5  | 2689 | 4.36  |
| LOC_Os01g34870.1 | expressed protein                                                                          | Chr1  | 19252668 | 19257404 + | 7  | 1644 | 4.51  |
| LOC_Os01g58690.1 | endonuclease/exonuclease/phosphatase family domain containing protein, expressed           | Chr1  | 33926601 | 33929805 + | 8  | 1646 | 4.72  |
| LOC_Os07g19070.1 | prefoldin, putative, expressed                                                             | Chr7  | 11287871 | 11292049 - | 3  | 1340 | 3.68  |
| LOC_Os11g28540.1 | expressed protein                                                                          | Chr11 | 16454525 | 16456582 - | 5  | 919  | -6.58 |
| LOC_Os03g23970.1 | diphthine synthase, putative, expressed                                                    | Chr3  | 13605475 | 13608086 - | 7  | 1545 | 5.55  |
| LOC_Os11g40890.1 | expressed protein                                                                          | Chr11 | 24476579 | 24480870 - | 5  | 2662 | -6.86 |
| LOC_Os07g36190.1 | hydrolase, NUDIX family, domain containing protein, expressed                              | Chr7  | 21625619 | 21628826 + | 6  | 1340 | 6.46  |
| LOC_Os03g23860.1 | retrotransposon protein, putative, Ty3-gypsy subclass, expressed                           | Chr3  | 13539616 | 13545172 + | 2  | 5359 | 5.13  |
| LOC_Os04g40720.1 | expressed protein                                                                          | Chr4  | 24161435 | 24167928 - | 6  | 4567 | 4.80  |
| LOC_Os03g12000.1 | DEAD-box ATP-dependent RNA helicase, putative, expressed                                   | Chr3  | 6286011  | 6288451 -  | 2  | 2194 | 5.22  |
| LOC_Os01g57490.1 | D-mannose binding lectin family protein, expressed                                         | Chr1  | 33218394 | 33223744 + | 11 | 2746 | 5.46  |
| LOC_Os03g16874.1 | expressed protein                                                                          | Chr3  | 9375951  | 9377728 +  | 3  | 698  | 3.96  |
| LOC_Os03g49730.4 | zinc finger protein, putative, expressed                                                   | Chr3  | 28309011 | 28312269 - | 10 | 2125 | 6.13  |
| LOC_Os06g10140.1 | expressed protein                                                                          | Chr6  | 5186447  | 5188307 -  | 3  | 1702 | 4.34  |
| LOC_Os05g34160.1 | mTERF domain containing protein, expressed                                                 | Chr5  | 20196728 | 20198598 + | 1  | 1903 | 6.14  |
| LOC_Os02g04730.1 | cycloartenol synthase, putative, expressed                                                 | Chr2  | 2148473  | 2153358 -  | 12 | 2241 | 5.21  |
| LOC_Os10g41860.1 | expressed protein                                                                          | Chr10 | 22522023 | 22524862 - | 5  | 1710 | 5.00  |
| LOC_Os12g01930.2 | lipase-related, putative, expressed                                                        | Chr12 | 555086   | 558636 -   | 10 | 2390 | 5.55  |
| LOC_Os01g18320.1 | protoporphyrinogen oxidase, chloroplast precursor, putative, expressed                     | Chr1  | 10291889 | 10295536 + | 9  | 2301 | 5.02  |
| LOC_Os03g32150.1 | expressed protein                                                                          | Chr3  | 18391035 | 18392132 - | 3  | 507  | 2.99  |
| LOC_Os08g37690.1 | expressed protein                                                                          | Chr8  | 23869795 | 23871110 - | 2  | 1251 | 4.95  |
| LOC_Os07g10250.1 | DEAD-box ATP-dependent RNA helicase 52B, putative, expressed                               | Chr7  | 5500195  | 5506490 -  | 7  | 2923 | 5.85  |
| LOC_Os02g26300.1 | expressed protein                                                                          | Chr2  | 15447211 | 15451795 + | 4  | 2651 | 4.12  |

|                  |                                                                                              |       |          |            |    |      |       |
|------------------|----------------------------------------------------------------------------------------------|-------|----------|------------|----|------|-------|
| LOC_Os05g16720.1 | retrotransposon protein, putative, Ty3-gypsy subclass, expressed                             | Chr5  | 9504921  | 9511639 -  | 3  | 5508 | 3.78  |
| LOC_Os03g16874.3 | expressed protein                                                                            | Chr3  | 9375951  | 9377728 +  | 3  | 692  | 3.96  |
| LOC_Os04g37904.2 | protein phosphatase 2C, putative, expressed                                                  | Chr4  | 22534358 | 22541033 - | 6  | 1957 | -4.91 |
| LOC_Os04g37904.1 | protein phosphatase 2C, putative, expressed                                                  | Chr4  | 22534358 | 22541033 - | 6  | 1960 | -4.91 |
| LOC_Os08g31110.1 | PPR repeat domain containing protein, putative, expressed                                    | Chr8  | 19215829 | 19217809 + | 1  | 2013 | 3.88  |
| LOC_Os11g29110.1 | Leucine Rich Repeat family protein, expressed                                                | Chr11 | 16860235 | 16864216 + | 3  | 3489 | 5.37  |
| LOC_Os04g38680.1 | transmembrane amino acid transporter protein, putative, expressed                            | Chr4  | 22977814 | 22980352 + | 3  | 1942 | 4.84  |
| LOC_Os02g14860.1 | prefoldin subunit, putative, expressed                                                       | Chr2  | 8262546  | 8265723 +  | 5  | 1020 | 4.67  |
| LOC_Os03g58820.1 | aminoacyl-tRNA synthetase, putative, expressed                                               | Chr3  | 33495989 | 33500471 - | 9  | 1782 | 5.37  |
| LOC_Os01g04350.1 | hsp20/alpha crystallin family protein, putative, expressed                                   | Chr1  | 1941003  | 1941953 +  | 1  | 983  | -5.87 |
| LOC_Os05g43920.1 | auxin response factor 14, putative, expressed                                                | Chr5  | 25555850 | 25561791 + | 10 | 3150 | 4.38  |
| LOC_Os04g54380.1 | aluminum resistance protein, putative, expressed                                             | Chr4  | 32359202 | 32362652 + | 12 | 2409 | 6.01  |
| LOC_Os08g01660.3 | mago nashi, putative, expressed                                                              | Chr8  | 384088   | 388246 +   | 3  | 867  | 4.07  |
| LOC_Os06g43250.1 | expressed protein                                                                            | Chr6  | 25990413 | 25993227 + | 10 | 1566 | 3.26  |
| LOC_Os05g33010.1 | heat shock protein DnaJ, putative, expressed                                                 | Chr5  | 19353553 | 19357897 + | 6  | 1237 | 4.33  |
| LOC_Os05g33010.2 | heat shock protein DnaJ, putative, expressed                                                 | Chr5  | 19353553 | 19357897 + | 6  | 1228 | 4.33  |
| LOC_Os12g37050.1 | retrotransposon protein, putative, unclassified, expressed                                   | Chr12 | 22705056 | 22707035 - | 2  | 520  | 3.02  |
| LOC_Os05g50624.2 | transposon protein, putative, unclassified, expressed                                        | Chr5  | 29021911 | 29023638 + | 1  | 1760 | 4.36  |
| LOC_Os06g05630.1 | GDSL-like lipase/acylhydrolase, putative, expressed                                          | Chr6  | 2546752  | 2549257 +  | 5  | 1864 | 4.03  |
| LOC_Os04g45280.3 | histidine triad family protein, putative, expressed                                          | Chr4  | 26754330 | 26757287 - | 6  | 1191 | 5.27  |
| LOC_Os04g17100.1 | heavy metal-associated domain containing protein, expressed                                  | Chr4  | 9367935  | 9369158 -  | 3  | 1043 | -4.91 |
| LOC_Os03g05220.1 | expressed protein                                                                            | Chr3  | 2531043  | 2532705 +  | 6  | 967  | 5.03  |
| LOC_Os01g12260.1 | vacuolar ATP synthase subunit E, putative, expressed                                         | Chr1  | 6699462  | 6703371 +  | 6  | 1527 | 6.56  |
| LOC_Os04g39910.1 | receptor-like protein kinase, putative, expressed                                            | Chr4  | 23770072 | 23772456 + | 1  | 2417 | 5.20  |
| LOC_Os04g25784.7 | expressed protein                                                                            | Chr4  | 14956367 | 14957850 + | 4  | 1034 | 4.34  |
| LOC_Os05g12300.1 | expressed protein                                                                            | Chr5  | 7061991  | 7066152 +  | 4  | 2609 | 4.42  |
| LOC_Os03g62720.1 | exosome complex exonuclease, putative, expressed                                             | Chr3  | 35494074 | 35497784 + | 7  | 1569 | 4.10  |
| LOC_Os03g62720.2 | exosome complex exonuclease, putative, expressed                                             | Chr3  | 35494058 | 35497784 + | 7  | 1546 | 4.10  |
| LOC_Os02g25960.1 | ankyrin repeat family protein, putative, expressed                                           | Chr2  | 15233137 | 15238844 - | 4  | 2904 | 3.44  |
| LOC_Os07g43530.1 | helix-loop-helix DNA-binding domain containing protein, expressed                            | Chr7  | 26039678 | 26042226 - | 5  | 1408 | 3.21  |
| LOC_Os02g17650.1 | tocopherol cyclase, chloroplast precursor, putative, expressed                               | Chr2  | 10155843 | 10164747 - | 10 | 2321 | 5.87  |
| LOC_Os07g04860.1 | transposon protein, putative, unclassified, expressed                                        | Chr7  | 2140732  | 2143984 -  | 3  | 2707 | 5.03  |
| LOC_Os09g31490.1 | reductase, putative, expressed                                                               | Chr9  | 18994539 | 18998420 - | 6  | 1537 | 5.78  |
| LOC_Os09g01680.2 | DNA repair protein RAD51 homolog 4, putative, expressed                                      | Chr9  | 485012   | 490813 -   | 7  | 3032 | 5.04  |
| LOC_Os03g49730.3 | zinc finger protein, putative, expressed                                                     | Chr3  | 28309011 | 28312269 - | 12 | 1974 | 6.13  |
| LOC_Os03g58260.2 | indole-3-glycerol phosphate lyase, chloroplast precursor, putative, expressed                | Chr3  | 33193735 | 33198078 - | 10 | 2135 | 5.56  |
| LOC_Os07g30830.2 | SNF7 family protein, putative, expressed                                                     | Chr7  | 18250922 | 18253311 + | 3  | 824  | 4.12  |
| LOC_Os07g43530.2 | helix-loop-helix DNA-binding domain containing protein, expressed                            | Chr7  | 26039679 | 26042226 - | 4  | 1453 | 3.21  |
| LOC_Os01g63780.1 | nsp1-like C-terminal region family protein, expressed                                        | Chr1  | 37005746 | 37011356 - | 7  | 1543 | 8.08  |
| LOC_Os05g49740.1 | EMB2744, putative, expressed                                                                 | Chr5  | 28534151 | 28536925 - | 1  | 2807 | 5.42  |
| LOC_Os03g38950.2 | chloroplast post-illumination chlorophyll fluorescence increase protein, putative, expressed | Chr3  | 21634872 | 21637243 + | 6  | 1530 | 4.36  |
| LOC_Os02g07709.1 | expressed protein                                                                            | Chr2  | 4015963  | 4016812 +  | 1  | 882  | 3.40  |
| LOC_Os12g42150.1 | WD domain, G-beta repeat domain containing protein, expressed                                | Chr12 | 26128587 | 26130776 + | 3  | 1412 | 5.34  |
| LOC_Os09g20430.1 | SCO1 protein homolog, mitochondrial precursor, putative, expressed                           | Chr9  | 12289592 | 12294955 - | 8  | 1843 | 5.90  |
| LOC_Os08g36980.2 | AGAP010609-PA, putative, expressed                                                           | Chr8  | 23386886 | 23388722 + | 2  | 996  | 5.01  |



|                   |                                                                                              |       |          |            |    |      |       |
|-------------------|----------------------------------------------------------------------------------------------|-------|----------|------------|----|------|-------|
| LOC_Os05g43582.1  | tRNA methyltran, putative, expressed                                                         | Chr5  | 25346734 | 25349386 + | 6  | 1713 | 5.03  |
| LOC_Os11g43895.1  | expressed protein                                                                            | Chr11 | 26505492 | 26507776 - | 5  | 1077 | 4.23  |
| LOC_Os11g14130.1  | mTERF family protein, expressed                                                              | Chr11 | 7869285  | 7871990 +  | 2  | 2088 | 5.36  |
| LOC_Os02g06530.1  | armadillo/beta-catenin repeat family protein, putative, expressed                            | Chr2  | 3263668  | 3265606 +  | 2  | 1901 | 5.74  |
| LOC_Os02g58670.2  | bZIP transcription factor domain containing protein, expressed                               | Chr2  | 35853347 | 35854731 - | 2  | 1289 | 5.32  |
| LOC_Os01g59540.1  | GRF zinc finger family protein                                                               | Chr1  | 34425818 | 34427049 + | 4  | 1040 | 3.37  |
| LOC_Os03g38950.1  | chloroplast post-illumination chlorophyll fluorescence increase protein, putative, expressed | Chr3  | 21634867 | 21637243 + | 7  | 1485 | 4.36  |
| LOC_Os11g19220.1  | mitosis protein dim1, putative, expressed                                                    | Chr11 | 10977450 | 10982223 - | 5  | 2274 | 7.19  |
| LOC_Os01g63780.2  | nsp1-like C-terminal region family protein, expressed                                        | Chr1  | 37005746 | 37011356 - | 6  | 1581 | 8.08  |
| LOC_Os04g11060.1  | expressed protein                                                                            | Chr4  | 6011867  | 6012149 +  | 2  | 241  | -5.36 |
| LOC_Os08g01660.1  | mago nashi, putative, expressed                                                              | Chr8  | 384088   | 388246 +   | 3  | 891  | 4.07  |
| LOC_Os02g12480.10 | expressed protein                                                                            | Chr2  | 6508812  | 6513830 +  | 3  | 2667 | -4.38 |
| LOC_Os05g09000.1  | expressed protein                                                                            | Chr5  | 4983551  | 4986913 -  | 3  | 1660 | 3.66  |
| LOC_Os11g07100.2  | receptor-like protein kinase precursor, putative, expressed                                  | Chr11 | 3536286  | 3540184 +  | 3  | 3637 | 6.16  |
| LOC_Os10g09430.1  | retrotransposon protein, putative, Ty3-gypsy subclass, expressed                             | Chr10 | 5083921  | 5087974 +  | 3  | 1839 | 3.46  |
| LOC_Os12g38260.1  | expressed protein                                                                            | Chr12 | 23494447 | 23499242 + | 6  | 3258 | 3.40  |
| LOC_Os01g67120.1  | rhodanese-like domain containing protein, putative, expressed                                | Chr1  | 38961303 | 38966131 - | 13 | 2761 | 6.18  |
| LOC_Os01g03490.1  | heavy-metal-associated domain-containing protein, putative, expressed                        | Chr1  | 1404155  | 1407187 +  | 3  | 2525 | 4.12  |
| LOC_Os02g49820.1  | RNA recognition motif family protein, expressed                                              | Chr2  | 30444896 | 30448425 + | 9  | 2234 | 4.43  |
| LOC_Os10g27270.1  | expressed protein                                                                            | Chr10 | 14394956 | 14395372 - | 1  | 449  | 2.92  |
| LOC_Os03g10500.1  | adenylyl-sulfate kinase, putative, expressed                                                 | Chr3  | 5341101  | 5347082 -  | 7  | 1599 | 3.61  |
| LOC_Os01g55740.1  | OsRhmbd4 - Putative Rhomboid homologue, expressed                                            | Chr1  | 32094403 | 32098715 + | 8  | 1390 | 4.79  |
| LOC_Os08g21690.1  | retrotransposon protein, putative, unclassified, expressed                                   | Chr8  | 12957169 | 12963433 + | 5  | 5020 | -5.96 |
| LOC_Os01g37360.1  | retrotransposon protein, putative, Ty3-gypsy subclass, expressed                             | Chr1  | 20857354 | 20860554 - | 7  | 2327 | 4.90  |
| LOC_Os02g57100.1  | expressed protein                                                                            | Chr2  | 34963624 | 34966602 - | 5  | 1396 | 5.08  |
| LOC_Os08g04840.1  | MYB family transcription factor, putative, expressed                                         | Chr8  | 2433787  | 2436913 +  | 3  | 1748 | 7.16  |
| LOC_Os03g01920.1  | expressed protein                                                                            | Chr3  | 567974   | 570856 -   | 11 | 1637 | 5.10  |
| LOC_Os02g39340.2  | glycine-rich protein, putative, expressed                                                    | Chr2  | 23745236 | 23747925 + | 3  | 851  | 5.42  |
| LOC_Os01g60920.1  | OsFBX30 - F-box domain containing protein, expressed                                         | Chr1  | 35238064 | 35240993 + | 3  | 2284 | 4.70  |
| LOC_Os02g50560.2  | DSHCT domain containing protein, expressed                                                   | Chr2  | 30872771 | 30882871 + | 15 | 4924 | 5.60  |
| LOC_Os09g25420.1  | ZOS9-06 - C2H2 zinc finger protein, expressed                                                | Chr9  | 15234823 | 15237824 - | 4  | 2113 | 5.14  |
| LOC_Os02g12654.1  | expressed protein                                                                            | Chr2  | 6608063  | 6609105 +  | 3  | 599  | 4.03  |
| LOC_Os02g40900.1  | RNA recognition motif containing protein, putative, expressed                                | Chr2  | 24783195 | 24786565 - | 6  | 1459 | 5.70  |
| LOC_Os10g07340.1  | expressed protein                                                                            | Chr10 | 3868240  | 3871296 +  | 1  | 3089 | 6.27  |
| LOC_Os06g11410.1  | cyclin, putative, expressed                                                                  | Chr6  | 6019597  | 6021853 +  | 6  | 1772 | 6.23  |
| LOC_Os02g12480.5  | expressed protein                                                                            | Chr2  | 6508832  | 6513830 -  | 3  | 2647 | -4.38 |
| LOC_Os08g31130.1  | integral membrane protein DUF6 containing protein, expressed                                 | Chr8  | 19222064 | 19227521 - | 7  | 1617 | 5.32  |
| LOC_Os01g39270.1  | NAD binding domain of 6-phosphogluconate dehydrogenase containing protein, expressed         | Chr1  | 22088204 | 22091020 - | 11 | 1608 | 4.85  |
| LOC_Os04g15820.1  | expressed protein                                                                            | Chr4  | 8588650  | 8594339 +  | 12 | 3583 | 7.47  |
| LOC_Os02g50280.1  | pentatricopeptide, putative, expressed                                                       | Chr2  | 30698990 | 30701615 + | 1  | 2658 | 6.12  |
| LOC_Os11g06220.2  | expressed protein                                                                            | Chr11 | 2971164  | 2974447 +  | 1  | 3316 | 3.54  |
| LOC_Os02g06480.1  | SCO1 protein homolog, mitochondrial precursor, putative, expressed                           | Chr2  | 3227508  | 3233934 -  | 8  | 3858 | 5.67  |
| LOC_Os02g06480.2  | SCO1 protein homolog, mitochondrial precursor, putative, expressed                           | Chr2  | 3227508  | 3233934 -  | 8  | 3852 | 5.67  |
| LOC_Os02g40010.3  | phosphoribosyl transferase, putative, expressed                                              | Chr2  | 24223305 | 24228766 + | 8  | 1298 | 6.29  |
| LOC_Os03g35840.1  | transposon protein, putative, unclassified, expressed                                        | Chr3  | 19858185 | 19860916 - | 6  | 2520 | 5.02  |

|                  |                                                                               |       |          |            |    |      |       |
|------------------|-------------------------------------------------------------------------------|-------|----------|------------|----|------|-------|
| LOC_Os06g05630.2 | GDSL-like lipase/acylhydrolase, putative, expressed                           | Chr6  | 2546752  | 2549257 +  | 4  | 1932 | 4.03  |
| LOC_Os02g18784.1 | expressed protein                                                             | Chr2  | 10947696 | 10948612 - | 1  | 949  | 4.04  |
| LOC_Os05g31350.1 | conserved hypothetical protein                                                | Chr5  | 18223304 | 18224715 - | 2  | 1063 | 3.07  |
| LOC_Os04g24220.1 | OsWAK32 - OsWAK receptor-like protein kinase, expressed                       | Chr4  | 13863249 | 13868260 + | 6  | 3358 | 4.93  |
| LOC_Os06g03990.1 | aminotransferase, classes I and II, domain containing protein, expressed      | Chr6  | 1629717  | 1633629 +  | 4  | 2514 | 4.73  |
| LOC_Os01g62870.1 | oxidoreductase, aldo/keto reductase family protein, putative, expressed       | Chr1  | 36410638 | 36414610 + | 7  | 1736 | 3.67  |
| LOC_Os04g22830.1 | transposon protein, putative, CACTA, En/Spm sub-class, expressed              | Chr4  | 12927728 | 12930463 + | 7  | 2252 | 3.94  |
| LOC_Os04g12480.1 | pumilio-family RNA binding repeat containing protein, expressed               | Chr4  | 6902844  | 6909634 -  | 10 | 2769 | 5.02  |
| LOC_Os07g37640.1 | IKI3 family protein, expressed                                                | Chr7  | 22565757 | 22571603 + | 6  | 4880 | 5.10  |
| LOC_Os03g22610.2 | peptidyl-tRNA hydrolase, mitochondrial precursor protein, putative, expressed | Chr3  | 13031190 | 13034719 + | 9  | 1601 | 5.93  |
| LOC_Os07g33224.1 | BNR/Asp-box repeat family protein, putative, expressed                        | Chr7  | 19856175 | 19857873 + | 7  | 1340 | 3.65  |
| LOC_Os03g01160.2 | protein kinase family protein, putative, expressed                            | Chr3  | 110086   | 114398 -   | 9  | 3293 | -4.18 |
| LOC_Os08g08030.1 | double-strand break repair protein MRE11, putative, expressed                 | Chr8  | 4551510  | 4557530 -  | 20 | 2488 | 4.05  |
| LOC_Os09g07320.1 | ethanol tolerance protein GEKO1, putative, expressed                          | Chr9  | 3620063  | 3633216 +  | 10 | 1944 | 5.25  |
| LOC_Os06g44320.1 | expressed protein                                                             | Chr6  | 26756214 | 26757596 - | 2  | 1266 | 4.73  |
| LOC_Os09g12500.1 | EMB1381, putative, expressed                                                  | Chr9  | 7166573  | 7171386 +  | 12 | 2655 | 4.90  |
| LOC_Os09g12500.2 | EMB1381, putative, expressed                                                  | Chr9  | 7166573  | 7171386 +  | 12 | 2648 | 4.90  |
| LOC_Os05g39580.1 | bet v I allergen family protein, putative, expressed                          | Chr5  | 23239202 | 23240677 - | 1  | 1508 | 6.25  |
| LOC_Os02g43430.1 | protein kinase domain containing protein, expressed                           | Chr2  | 26208969 | 26213007 - | 4  | 2240 | 4.19  |
| LOC_Os12g40100.1 | expressed protein                                                             | Chr12 | 24793134 | 24798337 - | 5  | 1077 | 3.30  |
| LOC_Os04g24220.3 | OsWAK32 - OsWAK receptor-like protein kinase, expressed                       | Chr4  | 13863222 | 13868260 + | 5  | 3381 | 4.93  |
| LOC_Os02g12480.7 | expressed protein                                                             | Chr2  | 6508832  | 6513830 -  | 3  | 2339 | -4.49 |
| LOC_Os05g34670.1 | KH domain containing protein, putative, expressed                             | Chr5  | 20568919 | 20573667 - | 7  | 2100 | 6.70  |
| LOC_Os02g53680.1 | RPA1A - Putative single-stranded DNA binding complex subunit 1, expressed     | Chr2  | 32832832 | 32836481 - | 2  | 2655 | 6.17  |
| LOC_Os05g38984.1 | expressed protein                                                             | Chr5  | 22870780 | 22873243 + | 3  | 2082 | 5.13  |
| LOC_Os01g59580.1 | retrotransposon protein, putative, unclassified, expressed                    | Chr1  | 34458723 | 34466010 - | 11 | 3100 | 4.61  |
| LOC_Os03g19980.1 | tetratricopeptide-like helical, putative, expressed                           | Chr3  | 11252327 | 11255319 + | 2  | 2640 | 5.47  |
| LOC_Os11g13620.1 | expressed protein                                                             | Chr11 | 7460403  | 7461781 +  | 1  | 1411 | 4.78  |
| LOC_Os05g34480.1 | expressed protein                                                             | Chr5  | 20442734 | 20446077 + | 6  | 1473 | 3.93  |
| LOC_Os04g14204.1 | expressed protein                                                             | Chr4  | 7961018  | 7964447 -  | 4  | 1502 | 5.27  |
| LOC_Os04g14204.2 | expressed protein                                                             | Chr4  | 7961018  | 7964447 -  | 4  | 1502 | 5.27  |
| LOC_Os04g14204.3 | expressed protein                                                             | Chr4  | 7961018  | 7964447 -  | 4  | 1502 | 5.27  |
| LOC_Os09g36520.1 | ki1 protein, putative, expressed                                              | Chr9  | 21061116 | 21062797 - | 1  | 1714 | 3.83  |
| LOC_Os02g40010.1 | phosphoribosyl transferase, putative, expressed                               | Chr2  | 24223305 | 24228766 + | 7  | 1341 | 6.29  |
| LOC_Os04g51390.1 | aldose 1-epimerase, putative, expressed                                       | Chr4  | 30433199 | 30438364 + | 9  | 1840 | 7.83  |
| LOC_Os02g50560.1 | DSHCT domain containing protein, expressed                                    | Chr2  | 30872771 | 30882871 + | 16 | 5056 | 5.60  |
| LOC_Os11g43950.1 | dnaJ domain containing protein, expressed                                     | Chr11 | 26542837 | 26549304 + | 8  | 3583 | 4.14  |
| LOC_Os06g13640.1 | expressed protein                                                             | Chr6  | 7555463  | 7558367 -  | 8  | 1190 | 3.53  |
| LOC_Os04g51792.1 | PAP fibrillin family domain containing protein, expressed                     | Chr4  | 30688097 | 30689790 - | 4  | 1135 | 5.40  |
| LOC_Os05g46470.1 | expressed protein                                                             | Chr5  | 26922146 | 26923380 - | 3  | 768  | 5.10  |
| LOC_Os03g12430.1 | PPR repeat containing protein, putative, expressed                            | Chr3  | 6563354  | 6565219 -  | 1  | 1898 | 6.08  |
| LOC_Os09g30100.2 | NOL1/NOP2/sun family protein, putative, expressed                             | Chr9  | 18293017 | 18300990 + | 19 | 2374 | 5.91  |
| LOC_Os07g35920.4 | expressed protein                                                             | Chr7  | 21486604 | 21504497 - | 4  | 1096 | 3.30  |
| LOC_Os02g12480.3 | expressed protein                                                             | Chr2  | 6508832  | 6513830 -  | 4  | 2611 | -4.40 |
| LOC_Os09g26800.1 | polygalacturonase, putative, expressed                                        | Chr9  | 16282795 | 16287189 + | 5  | 2235 | -5.10 |

|                  |                                                                                             |       |          |            |    |      |       |
|------------------|---------------------------------------------------------------------------------------------|-------|----------|------------|----|------|-------|
| LOC_Os03g15690.2 | phosphate carrier protein, mitochondrial precursor, putative, expressed                     | Chr3  | 8656387  | 8660017 +  | 5  | 2066 | 4.63  |
| LOC_Os03g52258.1 | expressed protein                                                                           | Chr3  | 30013876 | 30014195 - | 2  | 232  | 5.65  |
| LOC_Os06g51050.1 | CHIT7 - Chitinase family protein precursor, expressed                                       | Chr6  | 30887215 | 30888471 + | 1  | 1289 | -9.96 |
| LOC_Os01g55890.6 | amino acid kinase, putative, expressed                                                      | Chr1  | 32185406 | 32189756 - | 10 | 2617 | 5.43  |
| LOC_Os05g17100.1 | retrotransposon protein, putative, Ty3-gypsy subclass, expressed                            | Chr5  | 9761271  | 9767991 -  | 3  | 5457 | 4.11  |
| LOC_Os06g36490.1 | ethylene-responsive element-binding protein, putative, expressed                            | Chr6  | 21431258 | 21435702 - | 4  | 1290 | 3.81  |
| LOC_Os01g05560.1 | expressed protein                                                                           | Chr1  | 2652648  | 2655639 +  | 2  | 1617 | 5.17  |
| LOC_Os04g44540.2 | mitochondrial carrier protein, putative, expressed                                          | Chr4  | 26369059 | 26371832 - | 6  | 1547 | 4.76  |
| LOC_Os05g49770.1 | CTP synthase, putative, expressed                                                           | Chr5  | 28551310 | 28557309 - | 21 | 3150 | -3.23 |
| LOC_Os07g40240.1 | GASR9 - Gibberellin-regulated GASA/GAST/Snakin family protein precursor, expressed          | Chr7  | 24125333 | 24127487 + | 2  | 2118 | 4.11  |
| LOC_Os06g11410.2 | cyclin, putative, expressed                                                                 | Chr6  | 6019597  | 6021861 +  | 5  | 1858 | 6.23  |
| LOC_Os12g40330.1 | expressed protein                                                                           | Chr12 | 24974393 | 24975145 + | 1  | 785  | 3.84  |
| LOC_Os04g54740.1 | expressed protein                                                                           | Chr4  | 32552399 | 32556341 + | 2  | 3741 | 6.59  |
| LOC_Os07g19070.2 | prefoldin, putative, expressed                                                              | Chr7  | 11287871 | 11292046 - | 1  | 4208 | 4.97  |
| LOC_Os01g27880.1 | sucrose-phosphatase, putative, expressed                                                    | Chr1  | 15568776 | 15573377 - | 9  | 2038 | 5.72  |
| LOC_Os03g10590.1 | splicing factor, putative, expressed                                                        | Chr3  | 5393933  | 5396987 -  | 4  | 1589 | 3.62  |
| LOC_Os11g47460.3 | MYB family transcription factor, putative, expressed                                        | Chr11 | 28703899 | 28705276 - | 3  | 1295 | -4.61 |
| LOC_Os01g22870.1 | expressed protein                                                                           | Chr1  | 12848912 | 12853410 + | 6  | 1300 | 3.71  |
| LOC_Os01g60680.1 | expressed protein                                                                           | Chr1  | 35088901 | 35093120 - | 11 | 1618 | 4.54  |
| LOC_Os05g42220.1 | leucine rich repeat domain containing protein, putative, expressed                          | Chr5  | 24691255 | 24695487 + | 5  | 2967 | 5.32  |
| LOC_Os01g55020.6 | expressed protein                                                                           | Chr1  | 31635593 | 31638417 + | 4  | 1057 | 4.15  |
| LOC_Os03g52280.1 | expressed protein                                                                           | Chr3  | 30022814 | 30024703 - | 3  | 925  | 3.88  |
| LOC_Os11g06880.1 | acyl-CoA synthetase, putative, expressed                                                    | Chr11 | 3374944  | 3377966 +  | 7  | 1767 | 5.74  |
| LOC_Os07g35610.1 | kelch repeat-containing protein, putative, expressed                                        | Chr7  | 21315434 | 21320392 - | 11 | 2584 | 3.24  |
| LOC_Os11g36450.1 | OsFBO15 - F-box and other domain containing protein, expressed                              | Chr11 | 21490562 | 21493404 - | 2  | 2093 | 4.35  |
| LOC_Os01g55890.5 | amino acid kinase, putative, expressed                                                      | Chr1  | 32185406 | 32189756 - | 9  | 2653 | 5.43  |
| LOC_Os08g24310.1 | receptor-like protein kinase precursor, putative, expressed                                 | Chr8  | 14673019 | 14679422 + | 2  | 3341 | -8.35 |
| LOC_Os05g04860.1 | agenet domain containing protein, putative, expressed                                       | Chr5  | 2334712  | 2339664 -  | 8  | 1720 | 4.62  |
| LOC_Os12g40480.2 | H-BTB9 - Bric-a-Brac, Tramtrack, Broad Complex BTB domain with H family conserved sequence, | Chr12 | 25045199 | 25048597 + | 3  | 2930 | 5.29  |
| LOC_Os03g15690.1 | phosphate carrier protein, mitochondrial precursor, putative, expressed                     | Chr3  | 8656387  | 8660017 +  | 6  | 2023 | 4.65  |
| LOC_Os09g36240.2 | deoxyribodipyrimidine photolyase family protein, expressed                                  | Chr9  | 20897579 | 20901393 + | 8  | 2055 | 6.51  |
| LOC_Os01g15530.1 | tetratricopeptide-like helical, putative, expressed                                         | Chr1  | 8732427  | 8734486 +  | 1  | 2092 | 5.04  |
| LOC_Os02g40010.4 | phosphoribosyl transferase, putative, expressed                                             | Chr2  | 24223305 | 24228766 + | 7  | 1374 | 6.30  |
| LOC_Os01g68010.5 | TBC domain containing protein, expressed                                                    | Chr1  | 39539150 | 39541096 + | 3  | 1425 | 4.71  |
| LOC_Os05g49770.2 | CTP synthase, putative, expressed                                                           | Chr5  | 28551310 | 28557309 - | 21 | 3138 | -3.23 |
| LOC_Os01g60050.1 | HEAT, putative, expressed                                                                   | Chr1  | 34731210 | 34735202 - | 9  | 1458 | 5.50  |
| LOC_Os02g08440.2 | WRKY71, expressed                                                                           | Chr2  | 4542914  | 4544983 +  | 3  | 1929 | -4.62 |
| LOC_Os05g02150.1 | expressed protein                                                                           | Chr5  | 658106   | 660255 -   | 2  | 1842 | 5.90  |
| LOC_Os04g47170.1 | ATROPGEF7/ROPGEF7, putative, expressed                                                      | Chr4  | 28013719 | 28017003 + | 7  | 2885 | -6.29 |
| LOC_Os03g48060.1 | class I glutamine amidotransferase, putative, expressed                                     | Chr3  | 27334203 | 27337910 + | 4  | 1283 | 5.39  |
| LOC_Os08g24390.4 | expressed protein                                                                           | Chr8  | 14725904 | 14732048 - | 12 | 2397 | 3.91  |
| LOC_Os10g10170.1 | PPR repeat domain containing protein, putative, expressed                                   | Chr10 | 5577483  | 5585549 -  | 18 | 3798 | -5.02 |
| LOC_Os04g27860.1 | 40S ribosomal protein S27, putative, expressed                                              | Chr4  | 16458037 | 16459244 + | 4  | 389  | 3.77  |
| LOC_Os09g30100.1 | NOL1/NOP2/sun family protein, putative, expressed                                           | Chr9  | 18293017 | 18300993 + | 21 | 2536 | 5.92  |
| LOC_Os03g01442.1 | expressed protein                                                                           | Chr3  | 305842   | 308488 -   | 1  | 2679 | 4.44  |

|                  |                                                                                              |       |          |            |    |      |       |
|------------------|----------------------------------------------------------------------------------------------|-------|----------|------------|----|------|-------|
| LOC_Os05g11900.1 | expressed protein                                                                            | Chr5  | 6773865  | 6774685 +  | 2  | 763  | 3.09  |
| LOC_Os01g59110.1 | indole-3-acetate beta-glucosyltransferase, putative, expressed                               | Chr1  | 34146161 | 34149193 + | 2  | 1674 | 3.87  |
| LOC_Os08g33140.1 | F-box domain containing protein, expressed                                                   | Chr8  | 20591459 | 20596596 + | 4  | 1826 | 3.70  |
| LOC_Os01g56960.1 | acid phosphatase, putative, expressed                                                        | Chr1  | 32903910 | 32905663 - | 7  | 1268 | 3.52  |
| LOC_Os09g31120.1 | pirin, putative, expressed                                                                   | Chr9  | 18707883 | 18710315 + | 4  | 1618 | 4.40  |
| LOC_Os01g43120.1 | DEAD/DEAH box helicase, putative, expressed                                                  | Chr1  | 24598181 | 24601892 + | 10 | 2725 | 5.71  |
| LOC_Os03g17560.1 | expressed protein                                                                            | Chr3  | 9757006  | 9759331 +  | 5  | 1115 | 4.71  |
| LOC_Os01g22550.2 | galactosyltransferase family protein, putative, expressed                                    | Chr1  | 12667343 | 12672757 - | 6  | 2201 | 4.50  |
| LOC_Os04g17660.3 | rhodanese-like domain containing protein, putative, expressed                                | Chr4  | 9671229  | 9674123 -  | 4  | 2258 | 4.34  |
| LOC_Os11g44700.1 | calmodulin binding protein, putative, expressed                                              | Chr11 | 27029845 | 27034055 + | 8  | 1414 | -5.71 |
| LOC_Os01g54040.3 | ATP-dependent protease La, putative, expressed                                               | Chr1  | 31078609 | 31088007 - | 12 | 2783 | 4.48  |
| LOC_Os03g29630.1 | ulp1 protease family protein, putative, expressed                                            | Chr3  | 16888876 | 16892201 + | 9  | 1482 | 3.81  |
| LOC_Os01g10400.2 | expressed protein                                                                            | Chr1  | 5478476  | 5479836 +  | 3  | 811  | 4.39  |
| LOC_Os01g66890.2 | BTBZ1 - Bric-a-Brac, Tramtrack, and Broad Complex BTB domain with TAZ zinc finger and Calmod | Chr1  | 38843729 | 38846536 + | 5  | 2261 | 4.57  |
| LOC_Os12g06180.1 | HVA22, putative, expressed                                                                   | Chr12 | 2927943  | 2934406 +  | 8  | 1133 | 3.52  |
| LOC_Os02g35210.1 | resistance protein, putative, expressed                                                      | Chr2  | 21166678 | 21169952 + | 2  | 2908 | 6.66  |
| LOC_Os05g03060.1 | expressed protein                                                                            | Chr5  | 1195078  | 1199241 +  | 8  | 2514 | 4.91  |
| LOC_Os04g46010.1 | PPR repeat domain containing protein, putative, expressed                                    | Chr4  | 27256245 | 27258942 - | 2  | 1896 | 5.97  |
| LOC_Os11g01875.1 | lipase-related, putative, expressed                                                          | Chr11 | 477308   | 480695 -   | 9  | 2333 | 6.04  |
| LOC_Os02g48630.1 | expressed protein                                                                            | Chr2  | 29783348 | 29786105 + | 7  | 1937 | 5.84  |
| LOC_Os07g01770.1 | expressed protein                                                                            | Chr7  | 452093   | 460151 -   | 8  | 1906 | 4.75  |
| LOC_Os06g24250.1 | expressed protein                                                                            | Chr6  | 14197703 | 14198849 + | 3  | 435  | 3.10  |
| LOC_Os05g39770.1 | aminotransferase, putative, expressed                                                        | Chr5  | 23355342 | 23360051 - | 9  | 2936 | -3.58 |
| LOC_Os01g62500.1 | OsFtsH3 FtsH protease, homologue of AtFtsH3/10, expressed                                    | Chr1  | 36182449 | 36187998 - | 8  | 3155 | 6.43  |
| LOC_Os10g06740.1 | receptor-like protein kinase precursor, putative, expressed                                  | Chr10 | 3500565  | 3504202 +  | 2  | 3616 | 4.36  |
| LOC_Os03g22330.1 | blue-light photoreceptor PHR2, putative, expressed                                           | Chr3  | 12794504 | 12797944 + | 4  | 1957 | 3.14  |
| LOC_Os06g42060.2 | expressed protein                                                                            | Chr6  | 25269114 | 25270617 - | 1  | 1536 | 4.81  |
| LOC_Os02g12480.9 | expressed protein                                                                            | Chr2  | 6508812  | 6513830 -  | 5  | 2574 | -4.39 |
| LOC_Os07g10495.1 | expressed protein                                                                            | Chr7  | 5652015  | 5653854 +  | 7  | 977  | 4.56  |
| LOC_Os09g21450.1 | cyclin, putative, expressed                                                                  | Chr9  | 12969478 | 12971905 - | 4  | 959  | 3.45  |
| LOC_Os06g14190.1 | NF-X1-type zinc finger protein, putative, expressed                                          | Chr6  | 7920479  | 7924037 -  | 1  | 3591 | 5.54  |
| LOC_Os05g39770.2 | aminotransferase, putative, expressed                                                        | Chr5  | 23355342 | 23360051 - | 8  | 2990 | -3.58 |
| LOC_Os03g15890.3 | RNA recognition motif containing protein, expressed                                          | Chr3  | 8767518  | 8770510 -  | 5  | 1987 | 5.09  |
| LOC_Os01g13170.1 | ubiquitin-conjugating enzyme E2, putative, expressed                                         | Chr1  | 7340717  | 7345465 +  | 7  | 2089 | 5.16  |
| LOC_Os03g57530.1 | DUF593 domain containing protein, expressed                                                  | Chr3  | 32800592 | 32802990 + | 3  | 1622 | 5.37  |
| LOC_Os02g08440.1 | WRKY71, expressed                                                                            | Chr2  | 4542762  | 4544983 +  | 4  | 2004 | -4.62 |
| LOC_Os04g49590.1 | regulatory protein, putative, expressed                                                      | Chr4  | 29577953 | 29581134 - | 4  | 1911 | 5.26  |
| LOC_Os08g40860.1 | RNA pseudouridine synthase, putative, expressed                                              | Chr8  | 25853729 | 25857347 + | 8  | 2395 | 3.90  |
| LOC_Os08g41550.1 | ubiquitin carboxyl-terminal hydrolase, putative, expressed                                   | Chr8  | 26245378 | 26250946 - | 2  | 4916 | 5.25  |
| LOC_Os02g49840.3 | OsMADS57 - MADS-box family gene with MIKCC type-box, expressed                               | Chr2  | 30456666 | 30461554 + | 3  | 1067 | 6.82  |
| LOC_Os02g11060.1 | WD domain, G-beta repeat domain containing protein, expressed                                | Chr2  | 5924720  | 5930096 +  | 7  | 1893 | 5.55  |
| LOC_Os06g21620.1 | expressed protein                                                                            | Chr6  | 12472950 | 12476347 - | 6  | 1535 | 6.62  |
| LOC_Os03g26080.1 | nucleoside-triphosphatase, putative, expressed                                               | Chr3  | 14938457 | 14942303 + | 8  | 2155 | 3.34  |
| LOC_Os01g47110.1 | expressed protein                                                                            | Chr1  | 26916205 | 26916570 + | 1  | 398  | 2.84  |
| LOC_Os04g24165.1 | retrotransposon protein, putative, unclassified, expressed                                   | Chr4  | 13818100 | 13820532 - | 2  | 1008 | 3.40  |

|                  |                                                                                                |       |          |            |    |      |       |
|------------------|------------------------------------------------------------------------------------------------|-------|----------|------------|----|------|-------|
| LOC_Os01g65560.1 | snRK1-interacting protein 1, putative, expressed                                               | Chr1  | 38055633 | 38057842 - | 4  | 1030 | 3.24  |
| LOC_Os03g60790.3 | heat shock protein DnaJ, putative, expressed                                                   | Chr3  | 34539897 | 34541316 + | 3  | 1101 | 4.15  |
| LOC_Os12g43110.1 | OsSAUR58 - Auxin-responsive SAUR gene family member, expressed                                 | Chr12 | 26768220 | 26768893 + | 1  | 706  | 3.06  |
| LOC_Os03g55640.2 | OsSigP2 - Putative Type I Signal Peptidase homologue%3B employs a putative Ser/Lys catalytic d | Chr3  | 31682861 | 31685057 - | 4  | 2043 | 4.55  |
| LOC_Os12g43930.1 | zinc finger, C3HC4 type domain containing protein, expressed                                   | Chr12 | 27263719 | 27265922 + | 2  | 1291 | 3.46  |
| LOC_Os08g42550.1 | AP2 domain containing protein, expressed                                                       | Chr8  | 26887946 | 26895503 + | 8  | 2284 | 4.66  |
| LOC_Os09g12750.2 | Myb-like DNA-binding domain containing protein, putative, expressed                            | Chr9  | 7316075  | 7322324 +  | 5  | 2980 | 4.67  |
| LOC_Os12g17070.1 | radical SAM enzyme, putative, expressed                                                        | Chr12 | 9766670  | 9772331 -  | 2  | 3663 | 6.01  |
| LOC_Os02g44930.1 | HMG1/2, putative, expressed                                                                    | Chr2  | 27225275 | 27227213 + | 7  | 1325 | 5.04  |
| LOC_Os10g42860.1 | ribosomal protein L35, putative, expressed                                                     | Chr10 | 23111980 | 23113864 - | 3  | 868  | 3.55  |
| LOC_Os07g37790.1 | expressed protein                                                                              | Chr7  | 22659562 | 22663678 + | 11 | 1559 | 4.43  |
| LOC_Os08g34170.1 | CAF1 family ribonuclease containing protein, putative, expressed                               | Chr8  | 21418716 | 21421093 + | 1  | 2410 | 4.43  |
| LOC_Os04g43150.2 | nuclear transport factor 2, putative, expressed                                                | Chr4  | 25543324 | 25549593 + | 9  | 3075 | 5.36  |
| LOC_Os08g39830.2 | ethylene-insensitive 3, putative, expressed                                                    | Chr8  | 25211515 | 25214797 + | 3  | 2552 | 7.20  |
| LOC_Os05g37150.2 | syntaxin 6, N-terminal domain containing protein, expressed                                    | Chr5  | 21708253 | 21711677 - | 6  | 1879 | 4.44  |
| LOC_Os06g12060.1 | mTERF family protein, expressed                                                                | Chr6  | 6461154  | 6465270 -  | 4  | 3073 | 4.38  |
| LOC_Os08g01030.1 | metal cation transporter, putative, expressed                                                  | Chr8  | 18912    | 24200 -    | 13 | 1801 | 4.07  |
| LOC_Os01g65940.1 | expressed protein                                                                              | Chr1  | 38283278 | 38286847 - | 7  | 2101 | 3.84  |
| LOC_Os07g25430.1 | photosystem I reaction center subunit IV A, chloroplast precursor, putative, expressed         | Chr7  | 14533304 | 14534386 + | 3  | 939  | 4.11  |
| LOC_Os01g64920.1 | nuclear matrix protein 1, putative, expressed                                                  | Chr1  | 37686056 | 37689486 - | 10 | 2211 | 4.82  |
| LOC_Os02g55530.1 | neurochondrin family protein, putative, expressed                                              | Chr2  | 34000669 | 34006651 + | 18 | 2517 | 5.81  |
| LOC_Os02g37834.1 | expressed protein                                                                              | Chr2  | 22835797 | 22837146 + | 3  | 780  | 4.97  |
| LOC_Os07g49300.1 | expressed protein                                                                              | Chr7  | 29522442 | 29530773 + | 24 | 4417 | 4.20  |
| LOC_Os08g30020.3 | membrane protein, putative, expressed                                                          | Chr8  | 18452698 | 18458174 + | 13 | 2455 | -4.66 |
| LOC_Os11g02860.1 | expressed protein                                                                              | Chr11 | 969861   | 970384 -   | 2  | 547  | 2.92  |
| LOC_Os12g42120.1 | PPR repeat containing protein, expressed                                                       | Chr12 | 26117865 | 26120045 + | 1  | 2213 | 5.40  |
| LOC_Os03g13190.1 | transposon protein, putative, unclassified, expressed                                          | Chr3  | 7110944  | 7115128 -  | 7  | 1508 | -3.48 |
| LOC_Os01g19130.1 | protein phosphatase 2C, putative, expressed                                                    | Chr1  | 10805496 | 10808081 - | 4  | 1804 | -3.08 |
| LOC_Os02g08440.3 | WRKY71, expressed                                                                              | Chr2  | 4542762  | 4544983 +  | 3  | 2083 | -4.62 |
| LOC_Os02g40010.2 | phosphoribosyl transferase, putative, expressed                                                | Chr2  | 24223305 | 24228766 + | 6  | 1459 | 6.31  |
| LOC_Os03g05220.3 | expressed protein                                                                              | Chr3  | 2530961  | 2532705 +  | 4  | 1027 | 4.96  |
| LOC_Os12g36930.1 | expressed protein                                                                              | Chr12 | 22641390 | 22643087 + | 3  | 708  | -4.88 |
| LOC_Os03g12080.1 | retrotransposon protein, putative, Ty3-gypsy subclass, expressed                               | Chr3  | 6339016  | 6340809 +  | 2  | 712  | 4.72  |
| LOC_Os09g03690.1 | expressed protein                                                                              | Chr9  | 1861957  | 1864446 +  | 2  | 1052 | 3.20  |
| LOC_Os03g59070.1 | phosphatase, putative, expressed                                                               | Chr3  | 33627374 | 33630350 - | 8  | 2159 | 4.43  |
| LOC_Os05g40200.1 | inactive receptor kinase At2g26730 precursor, putative, expressed                              | Chr5  | 23605419 | 23611006 - | 3  | 2966 | 6.05  |
| LOC_Os06g39900.3 | agenet domain containing protein, putative, expressed                                          | Chr6  | 23721773 | 23726847 - | 5  | 2869 | 5.90  |
| LOC_Os03g02080.2 | expressed protein                                                                              | Chr3  | 658651   | 661585 +   | 2  | 2893 | 6.31  |
| LOC_Os08g35910.1 | expressed protein                                                                              | Chr8  | 22647366 | 22652881 - | 8  | 2570 | 4.13  |
| LOC_Os04g35640.1 | retrotransposon protein, putative, unclassified, expressed                                     | Chr4  | 21716811 | 21719152 + | 2  | 2122 | 3.84  |
| LOC_Os07g42250.1 | strictosidine synthase, putative, expressed                                                    | Chr7  | 25287511 | 25290131 + | 6  | 1751 | 5.71  |
| LOC_Os02g39410.1 | protein phosphatase 2C, putative, expressed                                                    | Chr2  | 23776248 | 23782298 - | 10 | 2575 | 5.52  |
| LOC_Os07g28260.5 | expressed protein                                                                              | Chr7  | 16512603 | 16521870 + | 18 | 4893 | 3.96  |
| LOC_Os02g55310.1 | pentatricopeptide, putative, expressed                                                         | Chr2  | 33857140 | 33859405 - | 2  | 2046 | 4.39  |
| LOC_Os01g68490.1 | tetratricopeptide-like helical, putative, expressed                                            | Chr1  | 39794226 | 39799341 - | 3  | 4136 | 5.21  |

|                  |                                                                                      |       |          |            |    |      |       |
|------------------|--------------------------------------------------------------------------------------|-------|----------|------------|----|------|-------|
| LOC_Os01g68940.1 | ubiquitin family domain containing protein, expressed                                | Chr1  | 40061847 | 40063523 - | 3  | 402  | 5.22  |
| LOC_Os06g40630.1 | SFT2, putative, expressed                                                            | Chr6  | 24223752 | 24226794 + | 4  | 1318 | 5.15  |
| LOC_Os01g10280.3 | phosphoribosylaminoimidazole carboxylase, chloroplast precursor, putative, expressed | Chr1  | 5406048  | 5412768 +  | 16 | 3208 | 5.22  |
| LOC_Os02g37090.1 | hydrolase, alpha/beta fold family domain containing protein, expressed               | Chr2  | 22426234 | 22428905 + | 6  | 1834 | 5.29  |
| LOC_Os01g63710.2 | CDC6 - Putative DNA replication initiation protein, expressed                        | Chr1  | 36952783 | 36956735 + | 16 | 2547 | 5.49  |
| LOC_Os08g30020.2 | membrane protein, putative, expressed                                                | Chr8  | 18452699 | 18458174 + | 13 | 2505 | -4.66 |
| LOC_Os05g18524.1 | expressed protein                                                                    | Chr5  | 10720401 | 10723770 - | 5  | 1846 | 4.13  |
| LOC_Os04g17100.2 | heavy metal-associated domain containing protein, expressed                          | Chr4  | 9367935  | 9369140 -  | 2  | 1149 | -4.95 |
| LOC_Os05g51590.1 | N-rich protein, putative, expressed                                                  | Chr5  | 29584730 | 29586168 - | 1  | 1471 | -4.83 |
| LOC_Os05g05330.1 | expressed protein                                                                    | Chr5  | 2625971  | 2630241 -  | 11 | 1987 | 4.91  |
| LOC_Os10g41220.1 | protein kinase family protein, putative, expressed                                   | Chr10 | 22136928 | 22141736 + | 10 | 3231 | 4.83  |
| LOC_Os07g08460.2 | OsIAA24 - Auxin-responsive Aux/IAA gene family member, expressed                     | Chr7  | 4355211  | 4356575 -  | 2  | 1342 | 4.64  |
| LOC_Os03g20640.1 | expressed protein                                                                    | Chr3  | 11677890 | 11680211 + | 9  | 1504 | 4.80  |
| LOC_Os02g02550.1 | peptidyl-prolyl cis-trans isomerase, FKBP-type, putative, expressed                  | Chr2  | 924454   | 926632 +   | 7  | 1614 | 5.28  |
| LOC_Os10g27090.1 | expressed protein                                                                    | Chr10 | 14278731 | 14283314 + | 4  | 3022 | 4.81  |
| LOC_Os04g51390.2 | aldose 1-epimerase, putative, expressed                                              | Chr4  | 30433199 | 30438328 + | 8  | 2219 | 7.83  |
| LOC_Os03g63660.1 | expressed protein                                                                    | Chr3  | 35955546 | 35960595 - | 4  | 2213 | 3.84  |
| LOC_Os08g39830.1 | ethylene-insensitive 3, putative, expressed                                          | Chr8  | 25211493 | 25214797 + | 4  | 2661 | 7.21  |
| LOC_Os09g30105.1 | expressed protein                                                                    | Chr9  | 18301264 | 18304037 - | 6  | 1143 | 4.57  |
| LOC_Os02g30974.1 | expressed protein                                                                    | Chr2  | 18501203 | 18509632 - | 12 | 2960 | 5.82  |
| LOC_Os02g51830.1 | tRNA synthetase class II core domain containing protein, expressed                   | Chr2  | 31748768 | 31754456 - | 11 | 2735 | 6.87  |
| LOC_Os08g09780.1 | expressed protein                                                                    | Chr8  | 5652681  | 5655649 +  | 5  | 2239 | 5.45  |
| LOC_Os08g30020.1 | membrane protein, putative, expressed                                                | Chr8  | 18452605 | 18458174 + | 13 | 2551 | -4.66 |
| LOC_Os03g06654.2 | flavin monooxygenase, putative, expressed                                            | Chr3  | 3355041  | 3360485 +  | 7  | 3918 | 4.40  |
| LOC_Os01g39840.1 | expressed protein                                                                    | Chr1  | 22472670 | 22474413 - | 2  | 1696 | 5.68  |
| LOC_Os10g33960.3 | START domain containing protein, expressed                                           | Chr10 | 18085536 | 18089851 + | 13 | 2220 | 4.89  |
| LOC_Os12g10560.1 | clathrin adaptor complex small chain domain containing protein, expressed            | Chr12 | 5602144  | 5605797 +  | 6  | 648  | 5.16  |
| LOC_Os07g30110.1 | expressed protein                                                                    | Chr7  | 17767542 | 17771514 + | 9  | 1539 | 4.71  |
| LOC_Os11g08314.1 | methyltransferase, putative, expressed                                               | Chr11 | 4380785  | 4387947 +  | 6  | 3769 | 4.74  |
| LOC_Os03g11910.1 | DnaK family protein, putative, expressed                                             | Chr3  | 6243990  | 6247317 -  | 2  | 2384 | 6.99  |
| LOC_Os12g02970.1 | RNA binding protein, putative, expressed                                             | Chr12 | 1098580  | 1101299 -  | 7  | 1667 | 5.45  |
| LOC_Os04g04254.1 | sterol 3-beta-glucosyltransferase, putative, expressed                               | Chr4  | 1985634  | 1997948 -  | 14 | 2830 | 5.00  |
| LOC_Os09g29404.1 | glycogen operon protein glgX, putative, expressed                                    | Chr9  | 17857352 | 17868669 - | 23 | 4179 | 6.65  |
| LOC_Os06g01440.1 | integral membrane protein, putative, expressed                                       | Chr6  | 266681   | 271992 +   | 9  | 2794 | -6.31 |
| LOC_Os05g43820.3 | ras-related protein, putative, expressed                                             | Chr5  | 25474799 | 25477947 + | 9  | 1405 | 4.86  |
| LOC_Os07g08460.1 | OsIAA24 - Auxin-responsive Aux/IAA gene family member, expressed                     | Chr7  | 4355211  | 4356575 -  | 3  | 1262 | 4.64  |
| LOC_Os03g51459.1 | expressed protein                                                                    | Chr3  | 29448143 | 29450245 - | 3  | 843  | 3.09  |
| LOC_Os01g26920.1 | expressed protein                                                                    | Chr1  | 14993201 | 14998107 - | 9  | 1692 | 4.74  |
| LOC_Os04g01590.1 | arginase, putative, expressed                                                        | Chr4  | 396481   | 400947 +   | 6  | 1801 | 4.76  |
| LOC_Os01g03144.1 | white-brown complex homolog protein 7, putative, expressed                           | Chr1  | 1222905  | 1230507 -  | 12 | 3968 | 6.38  |
| LOC_Os06g46670.3 | glutamate receptor, putative, expressed                                              | Chr6  | 28345652 | 28349161 + | 3  | 2058 | 5.22  |
| LOC_Os10g22560.1 | peptide transporter PTR2, putative, expressed                                        | Chr10 | 11691142 | 11695039 - | 5  | 3249 | 5.83  |
| LOC_Os01g55020.3 | expressed protein                                                                    | Chr1  | 31635593 | 31638351 + | 4  | 795  | 3.20  |
| LOC_Os04g33050.1 | HIRAN domain containing protein, putative, expressed                                 | Chr4  | 20009913 | 20015529 + | 12 | 3672 | 4.30  |
| LOC_Os11g06410.1 | homeodomain, putative, expressed                                                     | Chr11 | 3091535  | 3096323 +  | 3  | 2965 | 5.85  |

|                  |                                                                     |       |          |          |   |    |      |      |
|------------------|---------------------------------------------------------------------|-------|----------|----------|---|----|------|------|
| LOC_Os09g26580.1 | expressed protein                                                   | Chr9  | 16097465 | 16102821 | + | 10 | 2699 | 3.72 |
| LOC_Os05g08854.2 | expressed protein                                                   | Chr5  | 4886631  | 4890243  | - | 4  | 1762 | 3.69 |
| LOC_Os12g43730.1 | expressed protein                                                   | Chr12 | 27162465 | 27167702 | + | 7  | 3429 | 5.27 |
| LOC_Os06g39900.2 | agenet domain containing protein, putative, expressed               | Chr6  | 23721773 | 23726847 | - | 4  | 2936 | 5.90 |
| LOC_Os12g41780.2 | glycosyl transferase family 17 protein, putative, expressed         | Chr12 | 25882977 | 25885922 | + | 2  | 2197 | 3.84 |
| LOC_Os02g07220.1 | peptidyl-prolyl cis-trans isomerase, FKBP-type, putative, expressed | Chr2  | 3711144  | 3713440  | - | 4  | 1141 | 3.41 |
| LOC_Os12g41780.1 | glycosyl transferase family 17 protein, putative, expressed         | Chr12 | 25882977 | 25885922 | + | 2  | 2202 | 3.84 |
| LOC_Os06g42540.1 | expressed protein                                                   | Chr6  | 25582962 | 25585092 | + | 3  | 1093 | 3.28 |
| LOC_Os03g58650.2 | expressed protein                                                   | Chr3  | 33402553 | 33405439 | + | 8  | 1482 | 5.35 |
| LOC_Os03g06654.1 | flavin monooxygenase, putative, expressed                           | Chr3  | 3355041  | 3360485  | + | 7  | 3980 | 4.40 |

**Table S5.** Expression patterns of genes involved in different hormone pathways as determined by mRNA-Seq analysis. Log2FC of expression in 7 dai complete galls (vs. control root tips; data extracted from Kyndt et al., 2012a), and the here-generated data of 7 dai giant cells and 14 dai giant cells versus the uninfected control cells.

|                 | Locus number     | Annotation                                      | 7 dai gall | 7 dai GC | 14 dai GC |
|-----------------|------------------|-------------------------------------------------|------------|----------|-----------|
| SA-biosynthesis | loc_os03g14990.1 | chorismate synthase 2, chloroplast precursor    | 0,55       | -3,70    | -4,81     |
|                 | loc_os04g43800.1 | phenylalanine ammonia-lyase                     | 0,11       | -0,65    | -0,97     |
|                 | loc_os02g41670.1 | phenylalanine ammonia-lyase                     | -0,22      | -3,13    | -6,06     |
|                 | loc_os11g48110.1 | phenylalanine ammonia-lyase                     | 2,17       | -2,61    | -1,70     |
|                 | loc_os12g33610.1 | phenylalanine ammonia-lyase                     | 3,91       | -0,19    | -0,54     |
|                 | loc_os04g43760.1 | phenylalanine ammonia-lyase                     | 0,64       | -1,25    | -1,36     |
|                 | loc_os02g41680.1 | phenylalanine ammonia-lyase                     | -1,88      | -5,31    | -5,37     |
|                 | loc_os02g41650.1 | phenylalanine ammonia-lyase                     | 0,88       | -3,47    | -4,56     |
|                 | loc_os02g41630.1 | phenylalanine ammonia-lyase                     | 1,13       | -3,11    | -4,87     |
|                 | loc_os05g35290.1 | phenylalanine ammonia-lyase                     | 1,59       | -3,74    | -2,75     |
|                 | LOC_Os09g19734   | isochorismate synthase 1, chloroplast precursor | -0,87      | 2,17     | -1,54     |
| JA-biosynthesis | loc_os08g39850.1 | lipoxigenase 8, chloroplast precursor           | 0,95       | -0,637   | -1,699    |
|                 | loc_os03g49380.1 | lipoxigenase 4                                  | -0,05      | 0,366    | -7,716    |
|                 | loc_os03g49260.1 | lipoxigenase 1                                  | -0,22      | 2,452    | -3,269    |
|                 | loc_os08g39840.1 | lipoxigenase 7, chloroplast precursor           | 1,00       | 0,00     | 0,849     |
|                 | loc_os03g08220.1 | lipoxigenase 6                                  | 0,66       | -2,212   | 3,499     |
|                 | loc_os03g52860.1 | lipoxigenase 2                                  | -1,57      | -0,271   | -2,335    |
|                 | loc_os02g19790.1 | lipoxigenase 3, putative                        | 2,00       | 0,481    | 0,00      |
|                 | loc_os03g49350.1 | lipoxigenase 3                                  | 0,65       | -1,326   | -5,368    |
|                 | loc_os04g37430.1 | lipoxigenase 5                                  | 1,12       | -4,208   | -5,491    |
|                 | loc_os02g10120.1 | lipoxigenase 2.3, chloroplast precursor         | 1,59       | 3,827    | 3,681     |
|                 | loc_os05g23880.1 | lipoxigenase A                                  | 0,08       | -1,811   | -6,087    |
|                 | loc_os03g55800.1 | allene oxide synthase 1, chloroplast precursor  | 0,12       | -4,956   | -2,017    |
|                 | loc_os02g12690.1 | allene oxide synthase 4                         | -0,88      | -6,205   | -6,655    |
|                 | loc_os03g12500.1 | allene oxide synthase 2                         | 4,41       | -1,633   | 0,00      |
|                 | loc_os02g12680.1 | allene oxide synthase 3                         | 0,08       | 0,00     | 0,00      |
|                 | loc_os03g32314.1 | allene oxide cyclase 4, chloroplast precursor   | 0,12       | -2,177   | 0,5       |
|                 | loc_os08g35740.1 | 12-oxophytodienoate reductase 3                 | 0,54       | -0,013   | 0,729     |
|                 | loc_os06g11290.1 | 12-oxophytodienoate reductase 2                 | -0,10      | -3,238   | -4,53     |
|                 | loc_os06g11200.1 | 12-oxophytodienoate reductase 2                 | 3,00       | -0,811   | -0,925    |



|                      |                  |                                               |       |        |        |
|----------------------|------------------|-----------------------------------------------|-------|--------|--------|
|                      | loc_os06g11240.1 | 12-oxophytodienoate reductase 2               | 3,06  | -7,008 | 0,849  |
|                      | loc_os02g35310.1 | 12-oxophytodienoate reductase 2               | -3,07 | -3,221 | 1,977  |
|                      | loc_os01g27230.1 | 12-oxophytodienoate reductase 2               | 2,95  | 3,468  | -3,32  |
|                      | loc_os06g11210.1 | 12-oxophytodienoate reductase 2               | 1,07  | -5,413 | -6,188 |
|                      | loc_os06g11280.1 | 12-oxophytodienoate reductase 2               | 1,39  | -2,899 | -5,293 |
|                      |                  |                                               |       |        |        |
| ABA-<br>biosynthesis | loc_os07g07050.1 | abscisic-aldehyde oxidase                     | 1,60  | -1,669 | 5,075  |
|                      | loc_os07g18120.1 | abscisic-aldehyde oxidase 1                   | 0,14  | 6,402  | 7,309  |
|                      | loc_os10g04860.1 | abscisic-aldehyde oxidase                     | 0,03  | -3,813 | -7,92  |
|                      | loc_os07g18158.1 | abscisic-aldehyde oxidase                     | 0,00  | -3,373 | 0,486  |
|                      | loc_os07g18154.1 | aldehyde oxidase 1                            | -1,32 | -3,912 | 5,676  |
|                      | loc_os03g57690.1 | aldehyde oxidase 1                            | 0,78  | -2,108 | -4,395 |
|                      | loc_os04g46470.1 | dioxygenase RAMOSUS5                          | 0,49  | -1,038 | -3,074 |
|                      | loc_os03g57680.1 | aldehyde oxidase 1                            | 0,83  | -1,544 | -4,146 |
|                      | loc_os04g37619.1 | zeaxanthin epoxidase                          | 1,41  | -1,179 | -0,914 |
|                      | loc_os07g05940.1 | 9-cis-epoxycarotenoid dioxygenase             | 2,00  | 0,00   | 0,849  |
|                      | loc_os12g42280.1 | 9-cis-epoxycarotenoid dioxygenase             | 2,81  | 0,186  | -3,184 |
|                      | loc_os08g28240.1 | 9-cis-epoxycarotenoid dioxygenase             | 1,59  | 2,827  | 2,297  |
|                      | loc_os12g44310.1 | 9-cis-epoxycarotenoid dioxygenase             | 1,61  | -3,177 | -1,284 |
|                      | loc_os02g47510.1 | 9-cis-epoxycarotenoid dioxygenase             | 4,09  | 0,492  | 0,00   |
|                      | loc_os03g44380.1 | 9-cis-epoxycarotenoid dioxygenase             | 3,81  | 0,858  | -6,886 |
|                      | loc_os06g45860.1 | molybdenum cofactor sulfurase                 | 0,53  | -1,506 | 6,841  |
| ABA-<br>degradation  | loc_os08g36860.1 | 8-hydroxylase                                 | 4,03  | 9,972  | 5,696  |
|                      |                  |                                               |       |        |        |
| GA-<br>biosynthesis  | loc_os04g09900.1 | ent-kaurene synthase A, chloroplast precursor | 2,83  | -2,621 | -9,446 |
|                      | loc_os02g36210.1 | ent-kaurene synthase A, chloroplast precursor | 5,21  | -2,689 | 0      |
|                      | loc_os02g17780.1 | ent-kaurene synthase A, chloroplast precursor | 2,00  | 0,067  | 2,203  |
|                      | loc_os04g52230.1 | ent-kaurene synthase B, chloroplast precursor | 3,46  | 7,152  | 6,087  |
|                      | loc_os04g10060.1 | ent-kaurene synthase B, chloroplast precursor | 1,74  | 1,575  | -6,684 |
|                      | loc_os06g37330.1 | ent-kaurene oxidase                           | 0,53  | 2,14   | -0,978 |
|                      | loc_os06g37224.1 | ent-kaurene oxidase                           | 3,32  | 1,129  | 0      |
|                      | loc_os06g37300.1 | ent-kaurene oxidase                           | 7,75  | -2,254 | 0      |
|                      | loc_os03g42130.1 | gibberellin 20 oxidase 2                      | 3,14  | 2,432  | 6,85   |
|                      | loc_os03g63970.1 | gibberellin 20 oxidase 1                      | 5,70  | 0      | -6,076 |
|                      | loc_os01g66100.1 | gibberellin 20 oxidase 2                      | 3,92  | 2,71   | 1,333  |
|                      | loc_os05g34854.1 | gibberellin 20 oxidase 2                      | 3,12  | 0,858  | 1,694  |
| GA-<br>degradation   | loc_os01g55240.1 | gibberellin 2-beta-dioxygenase                | 0,35  | -7,764 | -2,371 |
|                      | loc_os02g41954.1 | gibberellin 2-beta-dioxygenase 7              | 5,43  | 3,041  | 4,814  |
|                      | loc_os01g11150.1 | gibberellin 2-beta-dioxygenase                | 4,81  | 0,841  | -2,185 |
|                      | loc_os05g06670.1 | gibberellin 2-oxidase                         | -0,40 | 4,64   | -2,186 |

|                     |                  |                                              |       |       |       |
|---------------------|------------------|----------------------------------------------|-------|-------|-------|
|                     | loc_os04g44150.1 | gibberellin 2-beta-dioxygenase 7             | -1,00 | 3,022 | 0     |
|                     | loc_os05g11810.1 | gibberellin 2-beta-dioxygenase 1             | 1,48  | 3,482 | 1,442 |
| DELLA proteins      | loc_os03g49990.1 | DELLA protein SLR1                           | 0,95  | 3,604 | 2,597 |
|                     | loc_os01g45860.1 | DELLA protein RGA                            | 2,50  | 0,841 | 0     |
|                     |                  |                                              |       |       |       |
| ET-<br>biosynthesis | loc_os04g48850.1 | 1-aminocyclopropane-1-carboxylate synthase   | -3,59 | 0,00  | -0,38 |
|                     | loc_os01g09700.1 | 1-aminocyclopropane-1-carboxylate synthase 7 | -3,56 | -3,52 | 0,97  |
|                     | loc_os06g03990.1 | aminotransferase ACS12                       | -0,46 | 2,32  | 4,73  |
|                     | loc_os09g28050.1 | asparate aminotransferase                    | -1,09 | -0,34 | 0,11  |
|                     | loc_os03g48430.1 | 1-aminocyclopropane-1-carboxylate oxidase    | 2,62  | 0,49  | 0,00  |
|                     | loc_os06g14390.1 | 1-aminocyclopropane-1-carboxylate oxidase    | 1,22  | 1,76  | 1,62  |
|                     | loc_os05g05670.1 | 1-aminocyclopropane-1-carboxylate oxidase    | 5,94  | -1,13 | -3,61 |
|                     | loc_os06g37590.1 | 1-aminocyclopropane-1-carboxylate oxidase 2  | -2,00 | 2,52  | 0,49  |
|                     | loc_os03g64280.1 | 1-aminocyclopropane-1-carboxylate oxidase    | 1,30  | 0,84  | 0,00  |
|                     | loc_os05g05680.1 | 1-aminocyclopropane-1-carboxylate oxidase    | 5,30  | -3,47 | -2,33 |
|                     | loc_os08g30080.1 | 1-aminocyclopropane-1-carboxylate oxidase    | 1,32  | 1,78  | 0,00  |
|                     | loc_os01g39860.1 | 1-aminocyclopropane-1-carboxylate oxidase 1  | 1,22  | 4,41  | 4,61  |
|                     | loc_os03g63900.1 | 1-aminocyclopropane-1-carboxylate oxidase 2  | 1,90  | -4,30 | -3,37 |
|                     | loc_os06g14400.1 | 1-aminocyclopropane-1-carboxylate oxidase    | 1,05  | 5,05  | 3,16  |
|                     | loc_os11g08380.1 | 1-aminocyclopropane-1-carboxylate oxidase    | -1,69 | -5,98 | -0,54 |
|                     | loc_os02g53180.1 | 1-aminocyclopropane-1-carboxylate oxidase 1  | 5,02  | 4,78  | 3,41  |
|                     | loc_os09g27750.1 | 1-aminocyclopropane-1-carboxylate oxidase 1  | 4,71  | -2,91 | 0,00  |
